# Supplementary material for: Identification of autophagy-related genes in intestinal ischemia-reperfusion injury and their role in immune infiltration
Source: Front Physiol. 2025 May 26;16:1601968. doi: 10.3389/fphys.2025.1601968 (PMC12146356; doi:10.3389/fphys.2025.1601968)
Supplement: Supplementary file 1 [file Table1.xls]

## Sheet: All genes
	logFC	AveExpr	t	P.Value	adj.P.Val	B	sig
Fosb	5.53311	8.96994	31.7489400055114	3.42031078814582e-12	7.13100596220523e-08	16.7528424070218	Up
Thbs1	5.73346	12.0802	25.6313035196893	3.5193465447566e-11	3.66874280558151e-07	15.2152823893896	Up
Ch25h	4.1195	6.42923	23.0744896511319	1.09961782938338e-10	6.86262520587369e-07	14.3744054330757	Up
Adamts1	5.15416	9.27445	22.5298713487646	1.42378646399706e-10	6.86262520587369e-07	14.1761232558238	Up
Ly6g	4.82346	7.50106	22.2298466080604	1.64579241351472e-10	6.86262520587369e-07	14.0637314312026	Up
Adamts4	6.92645	7.76735	20.4075171070168	4.14034021253222e-10	1.43869921818474e-06	13.3289216214501	Up
Cebpd	3.48761	12.2786	20.0531845285573	4.99909053879356e-10	1.4889434091901e-06	13.1748553196918	Up
Tnfaip6	4.61263	7.60115	19.1750809754712	8.0875983781791e-10	2.1077292323332e-06	12.7758377065336	Up
S100a8	4.86303	5.90907	18.5372225033677	1.16237203526402e-09	2.69269939591329e-06	12.4696877356717	Up
Lilrb4b	3.51241	9.02027	18.3188948921842	1.31959335064898e-09	2.75122017676805e-06	12.3615702447905	Up
Areg	5.11174	11.4783	17.6759152711615	1.93356632067559e-09	3.34297998951215e-06	12.0328155933696	Up
Selp	5.93945	9.41311	17.6342364545741	1.98293605184268e-09	3.34297998951215e-06	12.0109562660573	Up
Apol7c	-4.16858	8.33261	-17.5449	2.09339515689475e-09	3.34297998951215e-06	11.9638897445982	Down
Itga5	3.56003	9.08114	17.4305299230871	2.24479446751259e-09	3.34297998951215e-06	11.9031280180051	Up
Tnfrsf12a	5.75664	11.0168	17.2214153691519	2.55323392787724e-09	3.54882494415417e-06	11.7907012172169	Up
Sphk1	3.82132	6.96785	16.6266242676707	3.71247108146906e-09	4.83758184859678e-06	11.4609759757879	Up
Csrnp1	3.67885	7.5745	16.1966037405379	4.90458671835274e-09	6.01504285240802e-06	11.213032713116	Up
Tnfaip2	2.91887	10.4205	15.8783830213643	6.05380813074394e-09	6.94470867368661e-06	11.0241429746657	Up
Hmox1	4.58754	10.325	15.739945376924	6.6425002687838e-09	6.94470867368661e-06	10.9404880667705	Up
Lilrb4a	2.90156	12.0273	15.6994646569185	6.82618976763269e-09	6.94470867368661e-06	10.9158537796934	Up
Ccl2	3.61254	9.2421	15.6632923453076	6.99500609849003e-09	6.94470867368661e-06	10.8937747470924	Up
Rnd1	4.76177	7.86623	15.5747143805348	7.42787438135056e-09	7.03926149894445e-06	10.8394411135067	Up
Sik1	2.88035	8.66225	15.2128325595755	9.52433408052375e-09	8.51194551430351e-06	10.6134555544518	Up
Hspb1	4.15972	8.77374	15.1649990847784	9.84650213433585e-09	8.51194551430351e-06	10.5830943432879	Up
Pde4b	4.01949	11.2577	15.1134986413701	1.02066592094387e-08	8.51194551430351e-06	10.5502754392875	Up
Ankrd22	2.2773	7.06297	14.841189797919	1.23650052065898e-08	9.91530744431502e-06	10.3744712380552	Up
Nr4a3	4.74241	9.52947	14.7708132752388	1.30002680634005e-08	1.00386144019939e-05	10.3284047651011	Up
Nuak2	-2.78346	9.90823	-14.6479	1.41962944471437e-08	1.05706622474464e-05	10.2473285445911	Down
Pgap1	2.26764	11.4638	14.2861069191982	1.8468053112089e-08	1.26265850225352e-05	10.0038730348381	Up
Gem	4.08902	11.4155	14.2766262041694	1.85973004582391e-08	1.26265850225352e-05	9.99739625472733	Up
Ctla4	3.97349	8.83135	14.263762503798	1.87742402848381e-08	1.26265850225352e-05	9.98860031145595	Up
C330018D20Rik	-1.89255	8.69404	-14.1183	2.09080938713125e-08	1.34755372509985e-05	9.88845683453735	Down
Emb	2.49747	9.96044	14.0914531216095	2.13292114385797e-08	1.34755372509985e-05	9.86987660684273	Up
Pard6b	2.00877	11.395	14.0386373278651	2.21861674099327e-08	1.36046883626379e-05	9.83314661034468	Up
Nrg1	2.71811	10.3726	13.9753850960852	2.32619875488996e-08	1.38568336687717e-05	9.78894705730504	Up
Il4ra	2.13398	13.2501	13.8944397746261	2.47221632997853e-08	1.39682132825781e-05	9.73204481759612	Up
Mmp19	4.2185	9.17899	13.8380574435726	2.57979418501245e-08	1.39682132825781e-05	9.69218301638096	Up
Clec2e	-2.7089	12.4694	-13.7986	2.65809807178757e-08	1.39682132825781e-05	9.66417576285601	Down
Maff	2.58706	8.23134	13.7782027361986	2.69958660437729e-08	1.39682132825781e-05	9.64966109871673	Up
Rdh10	1.93881	9.92109	13.7701680909601	2.71612158965461e-08	1.39682132825781e-05	9.64393697205631	Up
Zan	-2.18823	6.69686	-13.7434	2.77203457551361e-08	1.39682132825781e-05	9.62482975008959	Down
Cxcl5	3.45827	6.08906	13.7237273056452	2.81387576319382e-08	1.39682132825781e-05	9.61077584877452	Up
Gfpt2	4.12216	9.83022	13.6780577887395	2.91374266839064e-08	1.41275862542503e-05	9.57803978147844	Up
Errfi1	2.89158	13.755	13.3383736834392	3.7892322496894e-08	1.79549325394941e-05	9.33057707108252	Up
Il6	5.8148	7.72934	13.1796636119931	4.29293640618471e-08	1.98896513627878e-05	9.2125018138011	Up
Cxcl2	6.13146	8.24944	12.8157294646845	5.7447535517571e-08	2.60374710436052e-05	8.93564477155742	Up
Plat	2.94175	9.41739	12.5340927354614	7.2340123058574e-08	3.20897707584725e-05	8.71537399874393	Up
Ccl3	2.67616	7.20268	12.5053028755875	7.40839149552147e-08	3.21786571437765e-05	8.69255326045242	Up
Arl5b	2.19358	9.4031	12.4475458336775	7.7721336166179e-08	3.30696354638503e-05	8.64659873021748	Up
Kcne4	4.96389	7.95598	12.4043	8.0573858758037e-08	3.31148193897923e-05	8.61201204017868	Up
Stxbp4	-2.09642	7.24586	-12.3979	8.10041627358342e-08	3.31148193897923e-05	8.60689908220875	Down
Sbno2	2.14913	11.1608	12.3485417098451	8.44151745670455e-08	3.3406043866952e-05	8.56728628721386	Up
Abl2	2.33258	9.46992	12.3414077366774	8.49211149191067e-08	3.3406043866952e-05	8.5615447457121	Up
Socs3	3.71707	7.66034	12.2898478998785	8.86770096442073e-08	3.42375365568903e-05	8.51994194257913	Up
Tubb6	2.95967	8.88593	12.2462451388518	9.19940371848346e-08	3.48724305684839e-05	8.48461283736636	Up
Zfp493	-1.96689	5.68947	-12.2204	9.40270488756956e-08	3.50066061073103e-05	8.46357197746432	Down
Rnf152	-2.46999	11.2851	-12.126	1.01862630074283e-07	3.7258490779276e-05	8.38644915746683	Down
Slc10a6	2.51138	6.90603	12.0792399570794	1.060004478822e-07	3.8103505825793e-05	8.34803989073527	Up
Fbxo34	2.0142	10.0356	12.0549691386527	1.08221640036893e-07	3.82425927649013e-05	8.32802426715483	Up
Sipa1l2	2.18741	9.25633	12.0063372155041	1.12825695597385e-07	3.92050487918312e-05	8.28778938168763	Up
Ccr1	2.45174	7.42583	11.9714239457046	1.16261821868707e-07	3.97367659695192e-05	8.2587976700599	Up
Akap12	3.26636	10.3453	11.9324607014236	1.20231051567999e-07	3.98480789907757e-05	8.22633702089135	Up
Akr1b8	2.81203	9.89014	11.9251954651417	1.20987295633562e-07	3.98480789907757e-05	8.22027188958348	Up
Map3k8	2.46212	7.07454	11.9124988016148	1.22321313032263e-07	3.98480789907757e-05	8.20966314372928	Up
Stc1	2.75861	7.86502	11.8906675964895	1.24652518704469e-07	3.99827748072228e-05	8.19139406582271	Up
Ada	-5.82886	11.9697	-11.8195	1.32593400848543e-07	4.14982427216703e-05	8.13158728007953	Down
Nfkbia	1.73494	13.9778	11.8128856114925	1.33358063329268e-07	4.14982427216703e-05	8.12601509317588	Up
Trmt1l	-1.74663	11.4493	-11.7877	1.36320848189961e-07	4.17963729987132e-05	8.10471723760263	Down
Trib1	2.29933	9.20819	11.6423710340137	1.54838749818732e-07	4.67859868836339e-05	7.9810969190642	Up
Ppm1k	-1.74388	7.8204	-11.5538	1.67448921633081e-07	4.92159413112017e-05	7.90497226422654	Down
Nckap5	-2.21111	9.07897	-11.5281	1.71312245971916e-07	4.92159413112017e-05	7.88277536087687	Down
Rnd3	1.95173	12.4097	11.5218616222933	1.72272025389328e-07	4.92159413112017e-05	7.87733720998378	Up
Dab2	2.11587	11.0167	11.5215284815978	1.72323071404754e-07	4.92159413112017e-05	7.87704881570838	Up
Plekho2	2.44445	8.39521	11.4448935189818	1.8451297703301e-07	5.19852845697463e-05	7.81047721058996	Up
Lama3	-3.06857	11.546	-11.4167	1.89234194226186e-07	5.21647842204728e-05	7.78584901901749	Down
Cdca4	1.70205	10.5864	11.4112663317313	1.90154136925317e-07	5.21647842204728e-05	7.78112054176921	Up
Mt2	5.08269	14.8893	11.3663177296312	1.97988334940769e-07	5.36085557815596e-05	7.74174097830874	Up
Csf3	1.94421	6.20407	11.2792768828194	2.14171797948748e-07	5.72470232747879e-05	7.66502821240361	Up
Bcl2l11	2.11736	7.8387	11.1059790181666	2.50827028898646e-07	6.56683179748182e-05	7.51047938125134	Up
Castor2	-1.75395	8.90688	-11.101	2.51976854428772e-07	6.56683179748182e-05	7.50599933582329	Down
Klf10	1.88237	11.8755	11.0738871159748	2.58333031230138e-07	6.64936465199647e-05	7.48159119397076	Up
Bivm	-1.55211	8.58756	-11.025	2.70227966765468e-07	6.87071082816248e-05	7.43746147510648	Down
Lrfn4	2.16321	8.92654	10.8593667896459	3.15207315944155e-07	7.91777991580684e-05	7.28629461803069	Up
Sema7a	2.76493	10.0217	10.8203374207665	3.26944052097882e-07	8.11482921689136e-05	7.25034785230798	Up
Cxcl1	3.56425	6.40392	10.7677902265664	3.4349938423343e-07	8.4254337198621e-05	7.20174653819663	Up
Gpr4	2.07227	6.81205	10.751315928818	3.48874927641934e-07	8.45778298419381e-05	7.18646081445215	Up
Ifi207	2.27561	11.7796	10.7227519200753	3.58412467499884e-07	8.58912820104032e-05	7.15990250118481	Up
Procr	3.52585	7.8718	10.6899512934244	3.69714195772938e-07	8.75928553144316e-05	7.12931853530378	Up
Ets2	1.9265	13.067	10.670967380158	3.76431107303901e-07	8.81821590581914e-05	7.11157515048643	Up
Tnfsf10	-1.50744	12.9234	-10.6363	3.89028999297663e-07	9.0120728959522e-05	7.07912208635156	Down
S100a9	3.70889	7.6855	10.5864519941709	4.0798007236492e-07	9.34722695465517e-05	7.03220306432217	Up
Rnf122	1.98573	8.864	10.5373128303572	4.27630861200904e-07	9.62754198503244e-05	6.9857675670615	Up
Icam1	2.19264	8.81937	10.5328867170063	4.29450527415232e-07	9.62754198503244e-05	6.98157456844681	Up
Zswim4	1.68618	11.6983	10.4885695392562	4.48139474149929e-07	9.93963818782113e-05	6.93949622106514	Up
Ier3	3.41442	9.58862	10.4299717102389	4.74214516377875e-07	0.000104072615283814	6.88359147547157	Up
Ildr1	1.97507	9.85972	10.4164548941669	4.8045949619209e-07	0.000104344792042801	6.87065247496583	Up
Mpzl3	1.68457	10.0478	10.3721608348641	5.0155580454128e-07	0.000107803473905991	6.82813731522539	Up
Il1r2	3.41664	8.6394	10.3404066209295	5.17295894406825e-07	0.000108693327068847	6.79754991971015	Up
Gadd45g	2.90414	10.0373	10.3379868169049	5.18517088663645e-07	0.000108693327068847	6.79521530535427	Up
Smim3	3.42993	8.16479	10.3324247432923	5.21335925314628e-07	0.000108693327068847	6.78984704144865	Up
Crispld2	2.65081	10.3316	10.2674837222779	5.55503608857431e-07	0.000114670244961075	6.72696154710944	Up
Fhl2	2.4954	11.0949	10.2274613380958	5.7776246901908e-07	0.000118095781535086	6.68801482766851	Up
Ptch1	-1.65799	9.4203	-10.2163	5.84134377807652e-07	0.000118239006241862	6.6771381127343	Down
Gcnt2	1.43075	13.1923	10.1856562090416	6.02047430122679e-07	0.000120693142986805	6.64717665946441	Up
Lcn2	5.72315	10.0076	10.1258652898205	6.38719970891783e-07	0.000126825454029741	6.58848891303758	Up
Rcan1	2.37349	10.7759	10.0570264335345	6.83960570801408e-07	0.000133784107089312	6.52050932195014	Up
Tnfrsf1b	2.78238	8.71279	10.0455333914764	6.91845831790434e-07	0.000133784107089312	6.50911664400101	Up
Havcr2	2.30908	8.20287	10.0438403984564	6.9301566337214e-07	0.000133784107089312	6.50743738953082	Up
Plekhg3	2.04036	10.5437	10.0232032310809	7.07448923318959e-07	0.000135317455066761	6.48694607453777	Up
Mpzl2	1.82325	11.1548	9.98341401259162	7.36203042282408e-07	0.0001395150470969	6.44732498021293	Up
Hs3st1	2.56614	10.8708	9.97455238549828	7.42777602175446e-07	0.0001395150470969	6.4384804590187	Up
Rasd1	3.87019	6.3848	9.9193058781228	7.85225116497928e-07	0.000145971043595253	6.38317277383079	Up
Dusp5	3.00699	10.6977	9.91184971340225	7.91151994161046e-07	0.000145971043595253	6.37568613146727	Up
Cd14	2.67201	9.22269	9.8948872614275	8.04816398116666e-07	0.000147189623546793	6.35863459030145	Up
Baiap2	2.68328	7.37767	9.85277656833369	8.39855304254395e-07	0.000152262115116521	6.31618374892676	Up
Ier2	1.68886	10.3079	9.82604326256387	8.62953027797712e-07	0.000154495800381818	6.28914615765716	Up
Spry2	2.30425	9.05252	9.81852299637329	8.69573709346711e-07	0.000154495800381818	6.2815278877041	Up
Blnk	1.6685	11.908	9.81307235802139	8.74406659554632e-07	0.000154495800381818	6.27600280610962	Up
Cep350	-1.30407	12.4186	-9.71697	9.64564434644024e-07	0.000168293186117526	6.17811709720233	Down
Rgs16	3.16554	6.16694	9.71285983600403	9.68640334505402e-07	0.000168293186117526	6.17390828948082	Up
Cd44	2.09432	12.947	9.69118147758775	9.90436683998009e-07	0.000169525796913546	6.1516940122291	Up
Paqr8	2.08762	8.71669	9.68964935244833	9.91997084917866e-07	0.000169525796913546	6.15012226829672	Up
Slc25a28	1.97009	10.2883	9.64614524471587	1.03743208222251e-06	0.000175848955140301	6.10539691891368	Up
Spsb1	2.54529	10.3687	9.60361532173427	1.08403138586158e-06	0.000182265890030871	6.06149261533848	Up
Plaur	4.22983	9.71462	9.58215635025233	1.10839818807801e-06	0.000183511250004374	6.03927213969577	Up
Slc23a4	-2.783	7.72667	-9.5816	1.10904204041207e-06	0.000183511250004374	6.0386915691632	Down
Frmd4b	2.10988	12.5803	9.5622949518735	1.13147908646459e-06	0.000185749665147245	6.01866511521903	Up
Phactr2	-1.42802	10.4189	-9.54918	1.1470069484439e-06	0.000186827717719584	6.00503404133737	Down
Fosl1	3.22632	9.33152	9.53892536816933	1.15930411512044e-06	0.000187366910822838	5.99436781963348	Up
Csnk1e	1.72566	11.3328	9.52518654506492	1.17600678600761e-06	0.000187498693463237	5.98005811366824	Up
Trim30d	-1.56051	10.9748	-9.52347	1.17810584889846e-06	0.000187498693463237	5.97827400715377	Down
Hcar2	1.76507	5.85372	9.50398198042276	1.20229836787322e-06	0.000189899383877188	5.95793531108931	Up
Cish	2.11619	7.08775	9.49588689456902	1.2125024350174e-06	0.000190071152388555	5.94947776854686	Up
Ereg	2.72553	12.6151	9.48566622781981	1.22551973802346e-06	0.000190678067298888	5.93879005736074	Up
Polr3g	-1.61099	7.02608	-9.42814	1.30165816245572e-06	0.000201024229844735	5.87844075373066	Down
Egr1	3.84845625000001	11.6598	9.41273105025338	1.32291368753297e-06	0.00020280461376011	5.86221579870877	Up
Myc	2.48116	12.5047	9.3999613457353	1.34081026649676e-06	0.000204047833913803	5.84875346692952	Up
Rad54l2	1.35432	9.85974	9.37057111283653	1.38300206595007e-06	0.000208943551253573	5.81770598077936	Up
Krt23	3.34425	6.84971	9.33351206216031	1.43825936746596e-06	0.0002157285579302	5.77843135813864	Up
Fzd2	-2.18868	6.98052	-9.30734	1.47872192814073e-06	0.000220065315798316	5.75060746023704	Down
Ccn1	3.04073	10.8428	9.30119483321316	1.48839564293007e-06	0.000220065315798316	5.74406694381955	Up
D6Wsu163e	-1.23465	8.68924	-9.29461	1.4988380662555e-06	0.000220065315798316	5.7370537166186	Down
Klf7	1.31483	11.3813	9.27187486929617	1.53551801519643e-06	0.000223874231460353	5.71279649059371	Up
Zfp182	-1.25581	8.3812	-9.21114	1.63832916992335e-06	0.000234597221758466	5.64774264324988	Down
Zfp318	-1.61409	8.32382	-9.20912	1.64188205864757e-06	0.000234597221758466	5.64556742469977	Down
Tm4sf1	3.28198	11.3351	9.20858524581551	1.64282192799348e-06	0.000234597221758466	5.64499277849365	Up
Gm13889	2.1276	6.04096	9.15698369737451	1.73630680661623e-06	0.000246260276266271	5.58940160636881	Up
Nags	-1.90894	10.2254	-9.14834	1.75252956624589e-06	0.000246881681936896	5.58005714952612	Down
Epha4	1.67264	8.36214	9.13966037076229	1.76896636877844e-06	0.000247524696796387	5.57067628987512	Up
Retnlg	4.00571	7.63879	9.13091147847276	1.78571220566153e-06	0.000248202091838915	5.5612073405861	Up
Il10	2.02661	6.1635	9.11950897018608	1.8077946271829e-06	0.000249607352199579	5.54885426576913	Up
Sele	2.07115	4.99294	9.09127754619001	1.86374751185519e-06	0.000255639946543875	5.51821024586054	Up
Mboat1	2.22668	11.5191	9.06958578528684	1.90800923337064e-06	0.000260000552330356	5.49460741416301	Up
Kctd21	-1.57058	7.16152	-9.05069	1.94749489671045e-06	0.000262182832253556	5.47400437428002	Down
Zfp260	-1.41044	10.5396	-9.04989	1.94917449274791e-06	0.000262182832253556	5.47313717935735	Down
S100a6	1.71545	11.1256	9.04218514178998	1.96554918629944e-06	0.000262690608879211	5.4647212800171	Up
Dennd2a	1.81849	5.40934	9.00171198098739	2.05399551019819e-06	0.000271157414621316	5.4204303397584	Up
Irak3	2.32249	10.722	8.99621743750221	2.06633031857388e-06	0.000271157414621316	5.41440399257183	Up
Hspa1b	2.78329	9.96095	8.99551263836258	2.06791831381789e-06	0.000271157414621316	5.41363074342397	Up
Adamts9	2.98721	9.93804	8.98584681694876	2.08982998787397e-06	0.000272317908857402	5.40302080221981	Up
Hspa1a	2.96123	10.0838	8.98012060821438	2.10292899218816e-06	0.000272322773652988	5.39673054923985	Up
Jdp2	1.74098	7.89338	8.97108489108508	2.12377929091346e-06	0.000273325150841078	5.38679762761914	Up
Medag	2.71724	10.5115	8.9621155988714	2.14469718927508e-06	0.0002736246576216	5.3769290413974	Up
Fam107a	1.68276	6.51574	8.95885574425777	2.15235473403724e-06	0.0002736246576216	5.37334019592789	Up
Lig4	-1.89562	8.26345	-8.92475	2.23427117975099e-06	0.000282317089858354	5.33572053248196	Down
Arc	1.61799	6.65386	8.90117469986759	2.29284712713236e-06	0.00028797331176857	5.30964808984707	Up
Csf1	1.47723	12.2449	8.8480400436796	2.43105262236319e-06	0.00030350309056078	5.25065672673658	Up
Ccr8	1.50316	4.64747	8.82516363280094	2.49330084674952e-06	0.000309421603296909	5.22516392197634	Up
Dennd4a	2.49168	12.0963	8.80181256647002	2.55861854588175e-06	0.000313591667146002	5.19908303533176	Up
Ttc41	-1.30203	5.75975	-8.79704	2.5721831738504e-06	0.000313591667146002	5.19374953690814	Down
Arf2	1.3095	11.0989	8.79249200855392	2.58520361025545e-06	0.000313591667146002	5.18865614951321	Up
Tfb1m	-1.54432	7.0763	-8.79184	2.58706732932574e-06	0.000313591667146002	5.18792917177946	Down
Nlrp1b	-1.47501	8.86298	-8.77497	2.6359923612051e-06	0.000317675171900377	5.16902833729215	Down
Fgfr1	1.38393	6.21032	8.74755853819493	2.7176178764383e-06	0.000325629971872771	5.13825487374533	Up
Marf1	-1.43337	12.4844	-8.71722	2.81114856848073e-06	0.000334912208595741	5.10409923446057	Down
Stx11	1.72147	6.43269	8.70418453449718	2.85240104419246e-06	0.000337896075968003	5.08939093832748	Up
Zfp1008	-1.32087	7.9619	-8.69386	2.8855431780266e-06	0.000339890902365405	5.07772619688371	Down
Gm14305	-1.30352	11.4136	-8.68746	2.90627445610934e-06	0.000340409641210246	5.07049688628154	Down
Sh3pxd2b	1.86868	9.42937	8.68201816541416	2.92405193292697e-06	0.000340578540500527	5.06433818590848	Up
Ripk3	1.72274	11.2005	8.66216147826061	2.98988726400635e-06	0.000346311997595936	5.04184932710433	Up
Nlrp9b	-2.65052	11.2708	-8.65583	3.01122017400875e-06	0.000346855963579604	5.03466730877741	Down
Cd93	1.59551	8.61789	8.64511999967502	3.0476643991265e-06	0.000346952935815395	5.02251369725783	Up
Ttc9	1.62732	5.4329	8.64459322064296	3.04946946280911e-06	0.000346952935815395	5.02191548410493	Up
Adam8	1.8396	5.7439	8.64094977835031	3.06198571586324e-06	0.000346952935815395	5.01777711943558	Up
Pvr	2.05493	10.5089	8.62011776409717	3.13462207778462e-06	0.000352295871806277	4.99408669117569	Up
Apold1	2.37903	8.163	8.61776715802321	3.14293405707552e-06	0.000352295871806277	4.99141049134634	Up
Cenpj	-1.1412	7.01137	-8.59474	3.22561110312219e-06	0.000358462471173825	4.96516650737623	Down
Il1rl2	1.23549	8.28521	8.59124	3.23840660362911e-06	0.000358462471173825	4.9611645305982	Up
Nr4a1	2.44267	7.60141	8.58428945910414	3.26393069308143e-06	0.000358462471173825	4.95322809851972	Up
Zfp661	-1.42652	5.731	-8.58208	3.27207822259813e-06	0.000358462471173825	4.95070766059176	Down
Epha7	-2.36618	8.80357	-8.57889	3.28391443206871e-06	0.000358462471173825	4.94705718864151	Down
Osmr	2.78066	9.26854	8.56684943211306	3.32894550432538e-06	0.000359684689291206	4.93328707493255	Up
Lrat	-1.75583	7.60416	-8.56667	3.32961509104527e-06	0.000359684689291206	4.93308371698682	Down
Ephb4	-1.35054	10.1462	-8.55779	3.36326908726712e-06	0.000359983235435942	4.92291464022659	Down
Clic4	1.80088	12.2062	8.55444802838557	3.37602592223177e-06	0.000359983235435942	4.91908630206757	Up
Tas2r135	1.45549	5.10227	8.55024002018147	3.39216387268131e-06	0.000359983235435942	4.91426377701041	Up
Il1rn	3.81294	9.46517	8.54783007762093	3.40144358870357e-06	0.000359983235435942	4.91150099388494	Up
Id3	-1.6667	9.06393	-8.48713	3.64445717198228e-06	0.000383753977669993	4.84169125219154	Down
Gucy1a1	-1.4073	8.4146	-8.47051	3.71420355291121e-06	0.000389132813440431	4.82250665392356	Down
Mex3c	1.2647	12.8688	8.46261914333877	3.74781231660099e-06	0.000390099740585371	4.81338930101332	Up
Ctla2a	2.00063	8.799	8.45957864023202	3.76085413485824e-06	0.000390099740585371	4.80987314074967	Up
Zyx	1.50772	10.3798	8.43519343134079	3.86723823613605e-06	0.000399148762302973	4.78163471303715	Up
Hif1a	1.19521	14.4062	8.42963990353104	3.89191711740177e-06	0.000399717142762116	4.77519408969849	Up
Nrarp	-1.78008	7.09276	-8.40696	3.99447376057811e-06	0.000408239134481828	4.74885593169006	Down
Kcne3	-1.37833	12.8515	-8.38645	4.08972642149372e-06	0.000414332981888282	4.72498732959651	Down
Adam4	-1.5036	7.67401	-8.38558	4.09384595275486e-06	0.000414332981888282	4.72396752530708	Down
Pfkfb3	2.14002	12.5811	8.36133202570652	4.20975291027544e-06	0.000421755045540016	4.69568383329839	Up
Prrg4	2.27659	8.90181	8.3583735402663	4.22413639885621e-06	0.000421755045540016	4.69222795421059	Up
Thbd	3.04177	9.97136	8.35760792674164	4.22786726067742e-06	0.000421755045540016	4.69133345679207	Up
Tubb2a	2.0816	9.70294	8.34050881019833	4.31212413937985e-06	0.000428111791342527	4.67133811030501	Up
Dusp4	2.51055	7.71693	8.32155424518515	4.40764391511399e-06	0.000433865615657752	4.64913326514456	Up
Schip1	1.89000799999999	9.15268	8.32075941135535	4.41169890735496e-06	0.000433865615657752	4.64820122019742	Up
Bcl11b	-1.9388	6.65981	-8.31168	4.45831395414925e-06	0.000436391491220928	4.63754730186506	Down
Ccn3	1.51849	8.99642	8.3005513000373	4.51615673843872e-06	0.0004399876254192	4.62447982754703	Up
Cyth3	1.89935	11.603	8.29459602895787	4.54744633950414e-06	0.00044097538945266	4.61748009529166	Up
Junb	1.61629	10.9744	8.28370121636161	4.60529510923415e-06	0.00044451758209455	4.60466375653678	Up
Ackr1	1.49365	8.00328	8.27627804752751	4.64516429397197e-06	0.000445321735848749	4.59592338980562	Up
Glul	2.14117	12.6074	8.27164488630673	4.67023700830168e-06	0.000445321735848749	4.59046482489557	Up
Mblac2	-1.3864	5.60799	-8.27027	4.67770445349303e-06	0.000445321735848749	4.58884470889832	Down
Pgf	1.54961	6.69896	8.25542219273366	4.75918312753841e-06	0.000451019131936583	4.57133216979549	Up
Mab21l2	-2.16696	11.8053	-8.24676	4.80740893373501e-06	0.000453527913391137	4.56110637521705	Down
Sema6a	-1.4353	12.7999	-8.23317	4.8841525689662e-06	0.000457850452392198	4.54504161969068	Down
Gpr31b	1.55425	5.82307	8.23089448153352	4.89714858666891e-06	0.000457850452392198	4.54234597544567	Up
Adamts6	-1.35792	6.77406	-8.22446	4.93404245258599e-06	0.000459240406669488	4.53473191381523	Down
Rep15	-1.36626	7.36703	-8.21934	4.96360549907572e-06	0.000459938715778798	4.52867141760341	Down
Vmn1r91	-1.79923	6.50137	-8.21045	5.01544802112917e-06	0.000462686176073106	4.51812952193377	Down
Gmeb1	1.19799	9.34109	8.19286611341522	5.11964530255787e-06	0.000470217995211582	4.49726466721421	Up
Fam120b	-1.20982	8.97882	-8.18757	5.15150948344113e-06	0.000471069391316948	4.49096812230044	Down
Tnfrsf11b	1.64973	7.93271	8.16831777747216	5.2690420861717e-06	0.000478802455859539	4.46807248784551	Up
Serpina3n	2.52165	9.63132	8.16622287862602	5.28200704339267e-06	0.000478802455859539	4.46557797967761	Up
Gm7694	-1.31414	6.84282	-8.15271	5.36648351335774e-06	0.000484354176493487	4.4494716270983	Down
Trappc2b	-1.07203	8.49381	-8.1316	5.50130211271516e-06	0.000494382102362062	4.42428093002948	Down
Chst15	2.03319	10.8997	8.10750879232121	5.65972449787082e-06	0.000506436034575574	4.39545123439062	Up
Epcip	1.63278	5.67234	8.10174135793064	5.69836734146682e-06	0.00050771478932582	4.3885405255578	Up
Inhbb	1.23301	8.03411	8.09031873769718	5.77574229122624e-06	0.000510394082532192	4.37484184042116	Up
Trim8	1.44089	10.6902	8.0888220379527	5.78596424602118e-06	0.000510394082532192	4.37304574949205	Up
Epha2	1.85221	11.866	8.08649730128461	5.80188006907427e-06	0.000510394082532192	4.37025545280589	Up
Ppl	1.65433	7.04147	8.0806559427378	5.84208017598373e-06	0.000511527591547386	4.36324141949729	Up
Mafk	1.62359	7.92676	8.07751284936173	5.86383492636698e-06	0.000511527591547386	4.35946564228026	Up
Il1r1	2.34851	11.0533	8.05833174458854	5.99850114978252e-06	0.000521094793632565	4.33639776226074	Up
Mllt10	-1.26267	12.7291	-8.05339	6.03376128556424e-06	0.000521982942086012	4.33044271369713	Down
Prag1	1.85697	7.16714	8.03413211684447	6.17317232809309e-06	0.000531836652348813	4.30723119044662	Up
Slc7a1	1.14833	10.7469	8.02170387082553	6.26500053810273e-06	0.000536499013158482	4.29222457981219	Up
Fgf2	1.62212	7.95292	8.01543966751551	6.31184125425736e-06	0.000536499013158482	4.28465372340202	Up
Krt18	1.96151	13.6144	8.01432779260985	6.3201946597031e-06	0.000536499013158482	4.28330942563384	Up
Ptgs1	1.26666	10.1502	8.01046774332963	6.34928735078529e-06	0.000536499013158482	4.27864132164822	Up
Sh3bp4	1.39882	9.04842	8.00958606918734	6.35595262363398e-06	0.000536499013158482	4.27757482647889	Up
Snx13	-1.01727	11.8564	-7.9865	6.53321720332119e-06	0.000549209899748794	4.2496111704737	Down
Pdp1	1.55904	10.2156	7.98316543437967	6.55922418521031e-06	0.000549209899748794	4.24557202307076	Up
Thap2	-1.16866	7.17082	-7.96931	6.66863131877338e-06	0.000551962079546741	4.22875231287983	Down
Runx1	1.59829	8.31744	7.9678205183803	6.68048739363282e-06	0.000551962079546741	4.22694609601195	Up
Sdc4	1.70206	13.6759	7.96291443529047	6.71976519688399e-06	0.000551962079546741	4.22098496087141	Up
Rap2b	1.58157	8.95058	7.96030557550345	6.74075276383291e-06	0.000551962079546741	4.21781387228504	Up
Pakap	1.5292	8.78793	7.95898240848275	6.75142424537745e-06	0.000551962079546741	4.21620523588386	Up
Gadd45b	2.03564	7.9477	7.95555856044201	6.77912245642686e-06	0.000551962079546741	4.2120417121846	Up
Trpv3	1.52784	8.28837	7.95095989798875	6.81651733537628e-06	0.000551962079546741	4.20644732217892	Up
Timp3	2.24146	8.31834	7.95078121906791	6.81797477087362e-06	0.000551962079546741	4.20622990266126	Up
Rhoj	1.96452	11.6364	7.94709171775199	6.84814413563734e-06	0.000551962079546741	4.20173958469444	Up
Prkcg	2.20515	6.51366	7.94248892127938	6.8859832290716e-06	0.000551962079546741	4.19613540898748	Up
Ccdc191	-1.60852	8.5945	-7.94162	6.89317981131479e-06	0.000551962079546741	4.19507301706983	Down
Foxf1	1.52134	9.90006	7.93960759920358	6.90978477441121e-06	0.000551962079546741	4.19262591312252	Up
S100a14	2.20715	7.80318	7.93361291654297	6.95958894761359e-06	0.000552849566837668	4.18532104445195	Up
Cpne8	1.44053	8.14237	7.93189549045325	6.97392853749852e-06	0.000552849566837668	4.18322745167419	Up
Ganc	-1.16571	10.6823	-7.91491	7.11744382286627e-06	0.000562089341905071	4.16250644262974	Down
Csrp1	1.39585	14.0663	7.89979033000667	7.24792772383302e-06	0.000570234132506395	4.14402385514907	Up
Ninj1	1.28832	11.7543	7.84007397236344	7.78888815643633e-06	0.000610490711178726	4.07076739301241	Up
Gm4787	-1.93537	7.79939	-7.83171	7.86808288364132e-06	0.000614388239854075	4.06046909479895	Down
Cfap97	-1.53412	7.75367	-7.82431	7.93883854363259e-06	0.000617600167149985	4.05135489306893	Down
Aqp7	-2.51126	10.6174	-7.81881	7.99190931498746e-06	0.000619417536461611	4.04457151468555	Down
Ddit4	1.57142	9.29332	7.81096768488551	8.06817007915385e-06	0.000623012140667699	4.03490196981966	Up
Sema6b	1.52409	8.07811	7.80663988350529	8.11060850633917e-06	0.000623978142984005	4.02956019241922	Up
Papolg	-1.21169	10.6465	-7.7934	8.24195006376841e-06	0.000630220068339766	4.01320225168048	Down
Bcl7a	-1.32168	8.6706	-7.79002	8.27578751862333e-06	0.000630220068339766	4.0090299049751	Down
Abcc1	1.14015	9.33036	7.78936385509587	8.28242595448682e-06	0.000630220068339766	4.00821333728589	Up
Tbx3	-2.01763	10.604	-7.78209	8.35597151631538e-06	0.000631869385666874	3.99921003383784	Down
Mst1r	1.37098	11.4446	7.78122583548343	8.36471535536751e-06	0.000631869385666874	3.99814486927522	Up
AI987944	-1.55837	10.3437	-7.77803	8.39726620700993e-06	0.000632038278519675	3.99418925975989	Down
F3	4.78101	10.6344	7.77353058395254	8.443337242291e-06	0.000633219921455126	3.9886166195904	Up
Sdccag8	-1.24338	9.4499	-7.76658	8.51507660919874e-06	0.000636311226613564	3.97999904807784	Down
Tfcp2	-1.38464	7.63622	-7.76036	8.57974559290579e-06	0.000638853985237474	3.97229237522104	Down
Slc2a1	2.3053	13.1868	7.75649607007879	8.62022026700794e-06	0.000639583531483446	3.96749826665071	Up
Susd2	-2.45668	12.6942	-7.74917	8.69747184049414e-06	0.000643026916320789	3.95840978572851	Down
Axin2	-1.69827	11.0408	-7.73871	8.80914997850107e-06	0.000648982218734165	3.94541185473666	Down
Wdcp	-1.11393	6.5259	-7.72441	8.96432133876696e-06	0.000657135786653185	3.92762101410646	Down
Gm14295	-1.1443	11.1641	-7.72272	8.98286244885404e-06	0.000657135786653185	3.92551571515909	Down
Cysltr1	-1.46565	6.9356	-7.7106	9.11699360252936e-06	0.000664616082584387	3.91041279707569	Down
Tlr13	1.36539	7.55415	7.69103613527971	9.33795838285285e-06	0.000678352245031704	3.88600747633251	Up
D630039A03Rik	-1.18965	8.49348	-7.68171	9.44536159625978e-06	0.000683483257828521	3.8743513723801	Down
5730507C01Rik	-1.223	10.658	-7.67923	9.47415518789595e-06	0.000683483257828521	3.87124888288075	Down
Ppp2r2d	1.17179	10.3344	7.67013829144781	9.58042807918616e-06	0.000688766706975698	3.85987858885437	Up
Gm20939	-1.41467	7.54585	-7.66369	9.65658546377732e-06	0.000691856186715785	3.8518072135545	Down
Ip6k2	1.17601	9.85121	7.65670329000916	9.73987971358538e-06	0.000695434082700485	3.8430515497202	Up
Ifitm1	1.55852	11.91	7.65043354855367	9.81526605396619e-06	0.000698424853102871	3.83519104458505	Up
Ntf3	-1.02008	5.85237	-7.64463	9.88562178284294e-06	0.000701038532484668	3.8279090078838	Down
Rbm5	-1.0893	12.515	-7.64133	9.92578805913661e-06	0.000701500865237082	3.82377472999616	Down
S100a16	1.31191	10.1575	7.62312908623936	1.01509650326264e-05	0.000714991452585232	3.80090093702558	Up
Rnf170	-1.23497	7.979	-7.62023	1.01873563300741e-05	0.000715138694025979	3.79725164868718	Down
Arel1	-1.11146	14.7967	-7.59909	1.04567095515983e-05	0.000731583682688834	3.77063720073283	Down
Cx3cr1	-1.19776	5.28326	-7.5962	1.04942069175418e-05	0.000731751571986047	3.76698626227002	Down
Slc35e4	1.17431	4.73982	7.58366919176553	1.06581094364521e-05	0.000740703078801966	3.75117856708951	Up
Spry4	1.85635	8.2597	7.58062751697212	1.06983170471621e-05	0.000741027282778344	3.74733761940477	Up
Scd2	-1.47338	14.8042	-7.57525	1.07698384405141e-05	0.00074233075511904	3.74054065356661	Down
Cyb5d2	-1.29264	8.90147	-7.57386	1.07883456665101e-05	0.00074233075511904	3.73878914294026	Down
Anxa1	2.56665	10.0981	7.56845177619381	1.08609076406057e-05	0.000744865340128249	3.73195061512733	Up
Snx10	0.992687500000002	10.7055	7.56274530032398	1.09380225078332e-05	0.000746001927905558	3.7247325958833	NS
Gm14326	-1.0615	14.4183	-7.56069	1.09659336735226e-05	0.000746001927905558	3.72213254523876	Down
Cdh5	1.46114	10.8923	7.55930306998865	1.09848238221021e-05	0.000746001927905558	3.72037657225016	Up
Zfp85	-1.04956	7.52055	-7.55378	1.10603193075957e-05	0.000748690250792414	3.71338856978213	Down
Vim	1.93057	13.928	7.54599025157357	1.11678644487123e-05	0.000751191103330179	3.70351542539604	Up
Csf3r	2.17789	6.78186	7.54588502065903	1.11693242856902e-05	0.000751191103330179	3.70338205662316	Up
Aldh1a3	1.60183	8.40856	7.53995957868341	1.12518580981584e-05	0.000754308647873007	3.69586991797779	Up
Plk3	3.05437	9.78458	7.52652716211198	1.14413922237931e-05	0.000760252380433803	3.67882398226695	Up
Gxylt1	0.982208750000002	10.1869	7.52607069710013	1.14478930370702e-05	0.000760252380433803	3.67824431569264	NS
Wsb2	1.79827	11.4662	7.52592888080672	1.1449913542914e-05	0.000760252380433803	3.67806421723478	Up
Bdkrb1	1.90513	8.06016	7.51696405956377	1.15784198005181e-05	0.000766344363241274	3.66667418586279	Up
Fhip1a	1.19076	7.51832	7.48173032361061	1.20987016052835e-05	0.000796965534645494	3.62180893189976	Up
1700109H08Rik	1.10124	9.2675	7.48048694073201	1.21175152037326e-05	0.000796965534645494	3.62022274255562	Up
Naip6	-1.0289	14.942	-7.47545	1.21940975957817e-05	0.000799480316900796	3.61379118653828	Down
Zscan22	-1.38133	7.58663	-7.45768	1.24682984551086e-05	0.000814895155142818	3.59108796701961	Down
Pgpep1	-1.71833	9.37048	-7.44182	1.27186099671577e-05	0.000828657185016471	3.57079199449077	Down
Hmga1b	1.04326	12.4101	7.43686806832268	1.27978229325392e-05	0.000828735735302031	3.56445183321541	Up
Spry3	-2.18757	6.25324	-7.43678	1.2799314440369e-05	0.000828735735302031	3.56433282835152	Down
Zfp638	-1.36462	11.8555	-7.40749	1.32790870687774e-05	0.000856317739994443	3.52675078841202	Down
Yrdc	1.18601	8.59115	7.40567705629544	1.33094194651697e-05	0.000856317739994443	3.52442034507925	Up
Ptges	2.45081	8.2937	7.40334646085024	1.33485186578826e-05	0.000856317739994443	3.52142412580364	Up
Gpr35	-1.08378	9.60649	-7.37825	1.37773997769871e-05	0.000881119656289584	3.48911960037043	Down
Tlr3	-1.37091	11.8828	-7.37287	1.38713850951345e-05	0.000884417455194067	3.48217403671075	Down
Lonrf3	1.42402	7.60124	7.35638000019035	1.41633350037409e-05	0.000900278571624983	3.46089346364576	Up
Zwint	1.45044	10.2757	7.34780418702569	1.43178032464191e-05	0.000907330941898455	3.44980988531861	Up
Ramp3	1.58473	5.92512	7.34298292876261	1.44054380382922e-05	0.000910118114122283	3.44357456510007	Up
Taf4b	1.24928	9.16196	7.33576326349474	1.45377472529227e-05	0.000915702394187874	3.4342317145397	Up
Zkscan7	-1.12903	5.52681	-7.32653	1.47087746733952e-05	0.000923684467366313	3.42227934487945	Down
Tamalin	1.1723	7.47443	7.31917704056389	1.48466802881561e-05	0.00092954485684014	3.41274194357729	Up
Ctps1	1.11665	9.07188	7.31289372162938	1.49655479542809e-05	0.000934181764367671	3.40459162194535	Up
Stk40	2.12825	11.3933	7.30110457001639	1.5191342072223e-05	0.000945445644369483	3.38928552516995	Up
Lrp12	-1.25641	9.4794	-7.29471	1.53152677218742e-05	0.000950321478373078	3.38098076503788	Down
Hilpda	1.09657	8.22262	7.29010155823287	1.54053829623042e-05	0.000953076645047715	3.37498364246834	Up
Fam83b	-1.11698	13.4495	-7.28223	1.55604918554877e-05	0.000959824540517936	3.36474247719859	Down
Serpina3f	1.90553	8.98632	7.2792118292822	1.56204123546083e-05	0.000960678398764687	3.36081335265603	Up
Kcnk1	1.5243	13.1663	7.26150776361417	1.59769081129412e-05	0.000977477236152351	3.33774260395733	Up
Ccl7	1.7188	6.31742	7.26099684842784	1.59873249329921e-05	0.000977477236152351	3.33707620111627	Up
Hdc	2.94118	8.76233	7.24352571360632	1.63479616404558e-05	0.000996604246321237	3.31426734482253	Up
Gm14391	-1.18681	13.6588	-7.22231	1.67977365937588e-05	0.00102103793073842	3.28651220923464	Down
Itpkb	1.4222	9.80627	7.21384977976137	1.69807021465802e-05	0.00102843899497253	3.27543257352632	Up
Axl	1.51958	10.6063	7.21213072895683	1.70181521063612e-05	0.00102843899497253	3.27317940665701	Up
Robo4	1.19187	7.6413	7.20280727991362	1.72228165212517e-05	0.00103482549808424	3.26095230818466	Up
Rnh1	1.27129	12.0374	7.20279437072048	1.72231017235949e-05	0.00103482549808424	3.26093537063329	Up
Slc12a4	1.49693	7.91578	7.18527045702174	1.76149723991328e-05	0.00105440794530159	3.23792268797001	Up
Id4	-1.29164	8.30934	-7.1817	1.76959385919154e-05	0.00105440794530159	3.23323146777353	Down
Ptgs2	3.59369	9.42396	7.17928170570965	1.77510788510688e-05	0.00105440794530159	3.23004882283168	Up
Mettl4	-0.930564	8.86904	-7.17876	1.77630205332476e-05	0.00105440794530159	3.22936085581497	NS
Ubtd2	1.21687	7.69431	7.17705863252997	1.78018896228193e-05	0.00105440794530159	3.22712476795253	Up
Tubb2b	1.42732	6.56664	7.16541648225031	1.80705458549901e-05	0.0010672884151011	3.21180087792982	Up
Csf2rb2	1.78739	9.37688	7.14978715126487	1.84380750834415e-05	0.00108553625625993	3.19120054474446	Up
Rin1	1.30632	6.69136	7.14787289507819	1.84836381108099e-05	0.00108553625625993	3.18867521227795	Up
Pln	-1.73297	7.51853	-7.13817	1.87164474411949e-05	0.00109478164269533	3.17586766756323	Down
Apol9a	-1.76297	8.40418	-7.13694	1.87460811761826e-05	0.00109478164269533	3.17424881117265	Down
Ackr3	1.44442	7.47235	7.12898078839949	1.89398444985173e-05	0.00110300787136756	3.16372609509674	Up
Il18rap	1.17531	7.41766	7.12667114216771	1.89964415422939e-05	0.00110322231118464	3.16067268540263	Up
Cemip2	2.0022	9.18248	7.12246022875961	1.91000961314506e-05	0.00110616084512393	3.15510392027427	Up
Hba-a2	4.10942	13.2194	7.11207625664143	1.93583078874024e-05	0.00111800931064945	3.14136140817179	Up
Rgcc	1.72728	7.1737	7.10051779857678	1.965013746431e-05	0.0011304000204487	3.12604758533226	Up
Or8b53	1.40304	7.0772	7.09929485360073	1.9681289626499e-05	0.0011304000204487	3.12442625749045	Up
Hba-a1	3.86889	13.2912	7.08837683172596	1.99617653148869e-05	0.00114085342315985	3.10994273870833	Up
Gpr171	1.37389	10.2365	7.08795326537712	1.99727324789365e-05	0.00114085342315985	3.10938052658523	Up
Manbal	1.52919	8.79099	7.07333749291325	2.03551593713371e-05	0.0011595210867022	3.08996584468382	Up
Zfp948	1.28263	10.6355	7.06196242094625	2.06582279654574e-05	0.00117357873256627	3.07483607131346	Up
Tiparp	1.62321	10.4456	7.04882389929759	2.10143179145002e-05	0.00119056389728102	3.05733912979041	Up
Calca	1.11141	4.5347	7.04308720378366	2.11718584791868e-05	0.00119623869222917	3.04969212865361	Up
Art2b	-1.83978	5.57163	-7.01428	2.19822986747876e-05	0.00123781265705844	3.01122748484235	Down
Pla1a	0.961221249999999	6.45022	7.01042171976786	2.20934036347274e-05	0.00123781265705844	3.00606462828278	NS
Rb1	-1.0709	9.89376216666667	-7.00988	2.21090817635735e-05	0.00123781265705844	3.00533817414243	Down
6430548M08Rik	1.87682	8.83858	7.00863123562181	2.21451446631876e-05	0.00123781265705844	3.0036691256638	Up
Gab2	1.04313	9.95636	6.99858900496602	2.2437762136645e-05	0.00125081524809334	2.99022552265326	Up
Hdx	1.75486	5.40632	6.98944926626406	2.27076890153413e-05	0.0012624869554156	2.97797824422911	Up
Btg3	1.47013	9.63888	6.98270761479178	2.29090237028029e-05	0.00127029317866952	2.96893716902443	Up
Scmh1	1.08402	7.70622	6.9784816657005	2.30362043389037e-05	0.00127327774437292	2.96326670836026	Up
Ncoa7	1.30733	9.46729	6.97686720666089	2.30849914803091e-05	0.00127327774437292	2.96109975746961	Up
Spryd7	-1.05161	10.8369	-6.97303	2.3201307084282e-05	0.00127631675831186	2.95595177016355	Down
Fndc4	1.21033	5.66425	6.96862350315342	2.33358405296144e-05	0.00128033931368929	2.95002943194347	Up
Ccne2	-1.08242	9.14477	-6.95654	2.37089113877219e-05	0.00129739394625358	2.93378249084334	Down
Lyset	1.23907	12.4327	6.95363227652911	2.37995341995697e-05	0.00129894368724301	2.92987436548633	Up
Cyp2r1	-1.11172	5.63785	-6.94699	2.40082850696216e-05	0.00130691575826773	2.92092802640122	Down
Ifit1	-2.23279	8.91002	-6.93652	2.43410241485528e-05	0.00132157815748223	2.90682686044962	Down
Rhbdf1	1.33734	7.64961	6.93115955553295	2.4513242564011e-05	0.00132747167329108	2.89960360098596	Up
Cd80	1.61767	7.383	6.9272456412539	2.46398738815103e-05	0.00133087235895236	2.89432453793368	Up
Slc9a9	-1.08588	8.78085	-6.91868	2.49194031115514e-05	0.00134249259812076	2.88276639367409	Down
Emsy	-1.24294	10.8891	-6.91231	2.5129631007843e-05	0.0013503290641302	2.87415850142108	Down
Rabgef1	1.12265	10.8642	6.89883061210728	2.55805180896747e-05	0.00137102370604532	2.8559359881888	Up
Scml4	-1.08963	7.42175	-6.88564	2.60303557117079e-05	0.00138904029332336	2.83807185637123	Down
Gm3604	-1.35362	7.35833	-6.88507	2.60499186862408e-05	0.00138904029332336	2.83730195580516	Down
Slc46a3	-1.95674	12.4777	-6.87787	2.6299024340567e-05	0.00139874581244	2.82754843783195	Down
Gpr146	1.32429	7.96255	6.8673215316695	2.66687979464433e-05	0.00141480348189669	2.81323860784344	Up
Bcl2l14	0.993912750000002	7.38139	6.86411174736205	2.67824135282159e-05	0.00141722471992328	2.80888147245313	NS
Tmem181c-ps	1.93962	14.0953	6.84662998596304	2.74103862196214e-05	0.00144049758044769	2.7851260246208	Up
Tinagl1	1.39037	11.7071	6.84641857057883	2.74180765013763e-05	0.00144049758044769	2.78483848235385	Up
Plk2	2.30419	8.25102	6.84610478150192	2.74294949128368e-05	0.00144049758044769	2.78441169217422	Up
Gm14434	-1.2231	13.7377	-6.83499	2.78370739909039e-05	0.0014582290342622	2.76929221442975	Down
Flnc	1.39285	6.60143	6.82791799610809	2.81000782121557e-05	0.00146831711941161	2.75965245120634	Up
Map3k13	-1.07518	8.2072	-6.82291	2.82879645294916e-05	0.00147443943118843	2.75282081699816	Down
Zfp467	-1.29553	6.21737	-6.81538	2.85726100122319e-05	0.0014855619604614	2.74255659423435	Down
Slc28a2	-3.64173	11.6599	-6.79933	2.91899140523127e-05	0.00151388188576286	2.72064237393444	Down
Tgfbr3	1.32287	9.91052	6.7935679145185	2.94150487830201e-05	0.00152177258579947	2.71276481403975	Up
Grpr	-1.23824	5.72369	-6.78764	2.96486742019615e-05	0.00153006239712053	2.7046534049218	Down
Gfap	1.19163	6.58042	6.78555411932548	2.97312189960032e-05	0.00153053378974733	2.70180268596669	Up
Chic1	-1.07828	10.2413	-6.77949	2.99729090491419e-05	0.0015376571042047	2.69350093231889	Down
Ccdc71l	1.85823	8.95629	6.77838636370082	3.00170963313019e-05	0.0015376571042047	2.69199036668873	Up
Nr5a2	-1.21729	12.2065	-6.76317	3.0633988843862e-05	0.0015650288533745	2.67112983644545	Down
Adm	3.01848	10.8785	6.76151798308886	3.07015588771726e-05	0.0015650288533745	2.66887039890864	Up
Bcr	1.09601	10.8997	6.7543660960431	3.09967895516707e-05	0.00157622454966532	2.65905609940295	Up
Acnat1	-1.76073	9.74395	-6.75132	3.11232639112815e-05	0.00157880518074528	2.65488019439567	Down
Lrrc8a	1.19465	10.0967	6.74254466775165	3.14914685253912e-05	0.00159360589147058	2.64281845105176	Up
Gm14325	-0.959632	12.6427	-6.74056	3.15755225825863e-05	0.00159399048504683	2.64008468691587	NS
Cdc7	-0.90984	10.7686	-6.73678	3.17356667582586e-05	0.00159820511169791	2.63489618322809	NS
Rpl6l	1.03031	10.9841	6.72857946963127	3.20867770018482e-05	0.00161199328605189	2.62361127437557	Up
Slc66a2	1.33336	7.264	6.72629448215448	3.21853237372473e-05	0.00161262602039884	2.62046602488662	Up
Asb2	-1.14358	9.91849	-6.7247	3.22540673656442e-05	0.00161262602039884	2.61827765663919	Down
Egr2	1.06031	7.22016	6.72101442231165	3.24142840246234e-05	0.00161307401216905	2.61319534016303	Up
Epb41l4a	-1.22222	11.1114	-6.71893	3.25050642415468e-05	0.00161307401216905	2.61032674987741	Down
Ms4a6d	1.72489	8.61592	6.71871888289895	3.25143695499657e-05	0.00161307401216905	2.6100331598868	Up
Eid3	1.0225	10.5805	6.71738897097549	3.25725051140664e-05	0.00161307401216905	2.60820082898661	Up
Nol8	-1.02789	9.52951	-6.71413	3.27152628723682e-05	0.00161630453939812	2.60371514322107	Down
Eng	1.19359	10.5132	6.7041868979531	3.31556948011665e-05	0.00163419168063717	2.58999793537406	Up
Cbx5	-1.04346	11.8238	-6.70155	3.32736944176732e-05	0.00163613975215582	2.58635368102203	Down
Ece1	1.31861	9.42039	6.69925535274947	3.33764019490496e-05	0.00163732848055467	2.58319216785723	Up
Tia1	-1.02366	10.5056	-6.6969	3.34822789111891e-05	0.00163866674417695	2.57994322471212	Down
Lad1	0.889172500000001	13.8422	6.69112636642973	3.37436498031412e-05	0.00164759099472059	2.57196641374085	NS
Slc28a2b	-1.88858	9.24953	-6.68763	3.39029949687803e-05	0.00164855764841023	2.56713348997455	Down
Riok1	0.983862250000003	10.1716	6.68578139067794	3.39874796510033e-05	0.00164855764841023	2.56458025078618	NS
Ovol1	-1.77907	7.29356	-6.68549	3.40006613658401e-05	0.00164855764841023	2.56418245228077	Down
Hexim1	-1.03356	10.2942	-6.6788	3.43088708297119e-05	0.00165964187454446	2.55492483248583	Down
Usf3	-1.02304	11.7789	-6.66413	3.49948468949628e-05	0.00168890639563213	2.53461432930991	Down
C2cd4b	2.87699	6.50534	6.65273201215033	3.55376717609683e-05	0.00171114299894787	2.51882149792161	Up
Mgat3	-1.49532	8.98962	-6.64682	3.58230073814951e-05	0.00172090755967002	2.51061612728455	Down
Per1	2.7183	9.52334	6.64212737555664	3.6050995800338e-05	0.00172787864699137	2.50410656003823	Up
Carhsp1	1.0082	9.06058	6.63523784370586	3.6388738443167e-05	0.00174006607293942	2.49453828424968	Up
Gm11437	-1.711	12.5856	-6.62889	3.67031421447651e-05	0.00175108423472816	2.48571041102281	Down
Atat1	-1.35495	9.69888	-6.62597	3.68482060845938e-05	0.00175399143529154	2.48166266153984	Down
Pdpn	1.70255	8.69559	6.61806821705944	3.72452677635316e-05	0.00176645136124081	2.4706640652113	Up
Trim12c	-1.21886	9.63935	-6.61739	3.72794186265988e-05	0.00176645136124081	2.46972355128968	Down
Cdr2l	1.59029	5.77948	6.60430179759537	3.79476130426654e-05	0.00179403579212365	2.45149224857593	Up
Nudt7	-0.957258	6.79423	-6.59945	3.81985193076366e-05	0.0018018120566627	2.44472892226719	NS
Il1a	1.18892	5.45633	6.59520918498473	3.84192730471881e-05	0.00180655039288729	2.4388148899833	Up
Zfyve1	-1.08327	9.98329	-6.59419	3.84722708255532e-05	0.00180655039288729	2.43740011178415	Down
Vps13c	-1.05843	10.4589	-6.58898	3.87458332966679e-05	0.00181530759191512	2.43012810133375	Down
Klhl24	-0.864415	11.8117	-6.57663	3.94025609522153e-05	0.00183825790684983	2.41287735663312	NS
Myb	-1.25209	13.2337	-6.57646	3.94120238074668e-05	0.00183825790684983	2.41263088887972	Down
Spata13	1.03075	8.13053	6.57394293683949	3.95470936619445e-05	0.00184044052624527	2.40911930003927	Up
Lrrfip1	0.997087499999999	12.2599	6.56591618947912	3.99819465018139e-05	0.00185653363611652	2.39789451292217	NS
Vps37b	1.50574	8.08162	6.55740782124763	4.04484845268368e-05	0.00187402323088893	2.38598635641388	Up
Ovol2	-0.911484	6.80946	-6.54658	4.10506585654461e-05	0.00189492624182073	2.37081696250266	NS
Gdnf	1.36323	4.94723	6.54603110978732	4.10814265098072e-05	0.00189492624182073	2.37004785382431	Up
F2r	1.02823	10.4686	6.54263409624823	4.12724676470694e-05	0.00189548954604063	2.36528519694803	Up
Nfya	-0.868166	9.79063	-6.54258	4.12754690346034e-05	0.00189548954604063	2.36521054780177	NS
1110002L01Rik	-0.89206	6.13138	-6.53521	4.16933535519492e-05	0.00190300810194347	2.35486958549577	NS
Ccrl2	2.68358	7.7618	6.5350583620619	4.17019443364758e-05	0.00190300810194347	2.35465808363053	Up
Klf11	1.04797	8.23628	6.53360429681206	4.17849226021694e-05	0.00190300810194347	2.35261742310754	Up
Inf2	0.921723499999999	7.0273	6.5332653005337	4.18042932845752e-05	0.00190300810194347	2.3521416271231	NS
Zfp975	-1.03372	7.77585	-6.53094	4.1937146809082e-05	0.00190489667499466	2.34888429845018	Down
Arid5a	1.16867	6.15718	6.52713704969384	4.21561314463159e-05	0.00191068083592226	2.3435375766998	Up
Slc25a48	-2.47928	9.90947	-6.52415	4.23285513839655e-05	0.0019143339865603	2.33934722364417	Down
Gnl2	1.14047	12.6176	6.5218503447491	4.24622005532376e-05	0.00191622168687111	2.33611081381456	Up
Nr4a2	2.0737	9.66513	6.51796215458149	4.26888210150234e-05	0.00192150662634784	2.33064617650165	Up
Ankrd37	-1.85082	7.66356	-6.51462	4.28845882077201e-05	0.00192150662634784	2.32594875517738	Down
Il20rb	1.01094	7.05287	6.51312153199847	4.29727633677766e-05	0.00192150662634784	2.32383997641074	Up
Zfp781a	-0.997166	8.24228	-6.51152	4.30670009010952e-05	0.00192150662634784	2.32159097465946	NS
Golgb1	-1.0445	10.8266	-6.51076	4.31117916734177e-05	0.00192150662634784	2.32052375147129	Down
Prmt2	-1.62204	6.6209	-6.51042	4.31322893726695e-05	0.00192150662634784	2.32003572441606	Down
Samd9l	-1.27867	12.6065	-6.50541	4.34291881723295e-05	0.00193060798337931	2.31299271262562	Down
Fcgr3	1.29496	11.273	6.50313352694879	4.35650486665038e-05	0.00193095712261098	2.30978583352845	Up
Irf4	-1.76141	5.51455	-6.50096	4.36948203299448e-05	0.00193095712261098	2.30673197315534	Down
Zfp273	-0.916872	9.20286	-6.50047	4.3724529440782e-05	0.00193095712261098	2.30603411357928	NS
Cep76	-0.881764	6.25341	-6.49838	4.38501650990628e-05	0.00193095712261098	2.30308818062416	NS
Slc16a6	1.87222	11.4937	6.49537769539761	4.4030989867822e-05	0.00193095712261098	2.29886289937598	Up
Adgrf5	1.04824	11.071	6.49385445430333	4.41231252812954e-05	0.00193095712261098	2.29671664566664	Up
Tfe3	0.965301	9.40931	6.49368170961162	4.41335870054586e-05	0.00193095712261098	2.2964732269646	NS
Kbtbd8	-1.6876	5.72599	-6.49295	4.41779724440232e-05	0.00193095712261098	2.29544112589455	Down
Ptpn1	1.38853	11.6226	6.48474143131718	4.46786654272829e-05	0.00194654423039037	2.28386952540423	Up
Atf7ip	-1.01009	10.112	-6.48405	4.47213145166188e-05	0.00194654423039037	2.28288983806492	Down
Ly6c1	1.38553	12.0358	6.47994822903604	4.49738632351208e-05	0.00195345848872715	2.27710759174265	Up
Itpkc	1.39886	10.7275	6.47287686875157	4.54131813663355e-05	0.00196843953909923	2.26712586717373	Up
Slc25a35	-1.20842	9.92651	-6.46822	4.57047800325207e-05	0.00197184136600648	2.26055348919406	Down
Map3k21	-1.14147	7.38131	-6.46727	4.57648838519983e-05	0.00197184136600648	2.25920399983892	Down
Eif3g	0.939693249999999	10.1236	6.46710141099534	4.57753955176332e-05	0.00197184136600648	2.25896816677263	NS
Slc5a3	1.17194	9.74445	6.44419957113687	4.72424239193839e-05	0.00203083978617574	2.22657348308473	Up
Gclc	1.71657	12.1545	6.43682839001299	4.77252351380671e-05	0.00204534747736666	2.21613117138292	Up
Gal3st1	-0.868117	8.79087	-6.43529	4.78268485196017e-05	0.00204534747736666	2.21394688414102	NS
Zfp616	-1.15089	4.77348	-6.43457	4.78742178979773e-05	0.00204534747736666	2.21293021019421	Down
Dnajb4	1.50255	11.3299	6.43176298983379	4.80600757719579e-05	0.00204908899748374	2.20895086743646	Up
Zfp324	-1.41556	6.71723	-6.41785	4.89924843054591e-05	0.00208458021486636	2.18921617598252	Down
Sox6	-1.02144	10.8641	-6.40802	4.96636964107761e-05	0.00210883585838752	2.17524028079079	Down
Mga	-0.989022	11.5225	-6.40266	5.00332858149622e-05	0.0021202113332442	2.16762493850837	NS
Klhl9	-0.861507	12.4924	-6.39351	5.06714234839074e-05	0.00214289758258821	2.15460730102084	NS
Hbb-bt	2.92333	14.2842	6.39063498689121	5.08736234788116e-05	0.00214709347350151	2.15051663087317	Up
Ctnnal1	1.09932	9.23339	6.38831823318886	5.10372652484243e-05	0.00214964837002909	2.14721787920012	Up
Rgs1	2.15372	11.2587	6.38459142527214	5.13016868760873e-05	0.00215642917274102	2.14190979873214	Up
Msr1	0.916296750000001	7.4259	6.38126246447129	5.15391194552887e-05	0.00215815984115642	2.13716670425085	NS
Flt1	1.25459	9.9089	6.37957032952214	5.16602582880139e-05	0.00215815984115642	2.13475515200269	Up
Naip5	-0.854495	14.9471	-6.37869	5.17233811066888e-05	0.00215815984115642	2.13350077859754	NS
Mfhas1	-1.40376	9.63016	-6.37822	5.17569149876834e-05	0.00215815984115642	2.1328350158996	Down
Zfp931	-1.11391	12.4648	-6.37397	5.20633047145169e-05	0.00215838899819241	2.12677197431991	Down
Zdhhc13	1.46461	13.8633	6.37223305497347	5.21890617221266e-05	0.00215838899819241	2.1242937064181	Up
Gprc5a	1.86477	13.688	6.37186795000878	5.22155258344425e-05	0.00215838899819241	2.12377294213989	Up
Niban2	1.26026	10.7031	6.37085746538664	5.22888441977817e-05	0.00215838899819241	2.12233154753007	Up
Chic2	1.08196	12.7518	6.37043438722192	5.23195744248408e-05	0.00215838899819241	2.12172800929815	Up
Sprr2h	2.00468	5.15158	6.36924128011523	5.2406339648494e-05	0.00215838899819241	2.12002585649792	Up
Tubal3	-1.02878	12.7001	-6.36813	5.24870843725624e-05	0.00215838899819241	2.11844433645248	Down
Ly6a	1.53721	13.9325	6.36669573288617	5.25919717558021e-05	0.00215844491956047	2.11639356174444	Up
Dpyd	-1.08576	12.4006	-6.35867	5.31818894360448e-05	0.00217443876259817	2.10493485307791	Down
Gm5141	-1.05727	10.183	-6.35761	5.32600909234636e-05	0.00217443876259817	2.1034253731637	Down
Rps6ka5	-0.899513	9.4028	-6.35715	5.32945564625482e-05	0.00217443876259817	2.1027608057101	NS
Chordc1	-1.19307	11.5496	-6.35219	5.3663350359982e-05	0.00218520935870169	2.09567640491252	Down
Csf2rb	1.10848	8.84435	6.34681758876755	5.40659756447126e-05	0.00219731291660158	2.08799735206142	Up
Tacr1	1.2958	7.11324	6.34182145989228	5.4443351625346e-05	0.0022083452101884	2.08085147715559	Up
Gm2007	-1.1986	13.637	-6.33848	5.46973781430475e-05	0.00221434104253281	2.07606907808256	Down
Fer1l6	-1.00342	9.955	-6.33139	5.5240472967864e-05	0.00223199345137015	2.06591845545518	Down
Plscr1	1.85834	13.2894	6.32723945592707	5.55609742692392e-05	0.00224060106874152	2.05997478439953	Up
Hectd4	-0.96261	11.6294	-6.32399	5.58132209735896e-05	0.0022457502716474	2.05532089142663	NS
Dusp1	3.31328	14.0713	6.32282552507056	5.59040908909301e-05	0.0022457502716474	2.05364950153682	Up
Rfx3	-1.03772	8.65277	-6.31914	5.61925494039886e-05	0.00225299704331492	2.04836172186185	Down
Depp1	1.14368	6.94564	6.31724244830834	5.63413381990031e-05	0.0022546267948388	2.04564482642229	Up
Pcdh18	-1.12488	6.19027	-6.31467	5.6543916010012e-05	0.0022583986683769	2.04195722314792	Down
Ppp3cc	-1.20128	9.34402	-6.31129	5.68116990307806e-05	0.00226475547436471	2.03710283767809	Down
Slc25a40	-0.999443	10.3203	-6.30359	5.74261410323689e-05	0.00228296090603313	2.02604992676201	NS
Pcgf3	-0.882493	13.2231	-6.30283	5.74873843190269e-05	0.00228296090603313	2.02495472251925	NS
Nup54	0.883395	12.5699	6.30074440334185	5.76549010924998e-05	0.00228526051877857	2.0219649815731	NS
Gm5431	-1.71705	9.03763	-6.29918	5.77811965458177e-05	0.00228592062008302	2.01971665863199	Down
Ublcp1	-0.92725	10.8343	-6.29591	5.80463343878831e-05	0.00229206065464579	2.01501255792999	NS
Adat1	-1.38281	6.13758	-6.29104	5.84430238337794e-05	0.00230147679072362	2.00801433359982	Down
Ptprr	-1.61811	13.0689	-6.29027	5.85055733648387e-05	0.00230147679072362	2.0069151888123	Down
Naip2	-0.927333	12.3838	-6.28878	5.86279879937347e-05	0.00230194900504967	2.0047674593987	NS
Sema4a	-1.00682	10.5641	-6.28623	5.88376159405394e-05	0.00230583732094794	2.00109996683837	Down
Rnf217	1.11557	7.32089	6.28194098385198	5.91920344981866e-05	0.00231537472280055	1.99492887783813	Up
Pds5b	-0.850058	10.59	-6.27986	5.93647838389568e-05	0.00231778347988466	1.99193433971152	NS
Gvin-ps6	-2.11108	7.53737	-6.27689	5.96126728901432e-05	0.00231984660026931	1.98765243962036	Down
Hbb-bs	3.09686	14.1257	6.27655723033182	5.96401639284546e-05	0.00231984660026931	1.98717866914748	Up
Tnrc18	-0.992543	10.7804	-6.27194	6.00276809857297e-05	0.00232968102098064	1.98052342646005	NS
Fhl3	1.35488	7.89042	6.27088208647321	6.01164750965314e-05	0.00232968102098064	1.97900450758428	Up
Rapgef2	1.05079	11.8517	6.25812	6.12024780399179e-05	0.00236736635371846	1.96060625782477	Up
Mapk6	0.981799999999998	13.295	6.25665010243294	6.13289237264896e-05	0.00236786431624737	1.95848531421572	NS
Supt3	-0.898016	6.69234	-6.25431	6.15306566756633e-05	0.00237126185033439	1.95511055220571	NS
Avpr1a	1.96487	6.80016	6.24865289014845	6.20216625451262e-05	0.00238136397548982	1.94694250090831	Up
Pim3	2.22391	8.64027	6.24832825990049	6.20499588027486e-05	0.00238136397548982	1.94647	Up
Rell1	1.04616	11.3611	6.24734841457107	6.21354502693876e-05	0.00238136397548982	1.94505881265234	Up
Mtf2	-0.874013	10.895	-6.24542	6.23040513837428e-05	0.00238220312523026	1.94227404013501	NS
Ptprd	-1.14817	11.9683	-6.24449	6.23858653353025e-05	0.00238220312523026	1.94092543346498	Down
Apol10b	-1.11902	8.13014	-6.24284	6.25307419556454e-05	0.00238337008964031	1.93854163650268	Down
Fkbp5	3.17849	13.2448	6.24014965931886	6.27674125872917e-05	0.0023880251551687	1.93465929210858	Up
Hoxb6	-2.42476	6.96698	-6.2322	6.34732363145363e-05	0.00240806903042167	1.92316711023489	Down
Rhobtb2	-0.912905	6.71616	-6.23162	6.35252514140686e-05	0.00240806903042167	1.92232525486099	NS
Mt1	1.76548499999999	16.7186	6.22811232022863	6.38395325477406e-05	0.0024155905881812	1.91725325653303	Up
Rnf186	-1.02213	9.45872	-6.22308	6.42933816418474e-05	0.00242835636567188	1.90997265176278	Down
Mb21d2	-1.13258	8.82445	-6.22149	6.44376420720244e-05	0.00242940397750386	1.90766917745407	Down
Cpn1	-2.161	6.49877	-6.21247	6.52623236089374e-05	0.0024560544854201	1.8945990949589	Down
Klhl42	-1.44991	8.70577	-6.19383	6.70013646710135e-05	0.00251695757121795	1.86756959832614	Down
Polg2	-1.10511	8.07165	-6.18655	6.76943261450255e-05	0.00253599735858875	1.85699365311149	Down
Kmt2d	-0.901723	9.56449	-6.18471	6.78701578364254e-05	0.00253599735858875	1.85432730357709	NS
Lrrc25	0.869986249999999	5.57501	6.18372806723947	6.79648552659543e-05	0.00253599735858875	1.8528941462248	NS
Art2a	-1.732	5.66226	-6.18247	6.80857830468147e-05	0.00253599735858875	1.85106691152228	Down
Pot1b	-1.01056	9.34491	-6.18215	6.81163854769869e-05	0.00253599735858875	1.85060501830286	Down
AW146154	-1.18626	9.02209	-6.17986	6.83376764763966e-05	0.00253970092131264	1.84727114611603	Down
Cd86	1.30931	7.34493	6.17522041739435	6.87876312893723e-05	0.00255187424333118	1.84052542546795	Up
Pcmtd2	-1.14879	9.00105	-6.17088	6.92112588750745e-05	0.00256187490696754	1.83421453056984	Down
Rpl23a	0.824672500000002	13.1643	6.16994696875429	6.93029616542611e-05	0.00256187490696754	1.83285348608559	NS
Utp4	1.00981	11.1915	6.16469395229419	6.98203955619873e-05	0.00257643438419801	1.82520730346242	Up
Adamts3	1.08757	4.94998	6.15956568101933	7.03295225455441e-05	0.00259063642323683	1.8177388756715	Up
Xcr1	-1.27216	6.78043	-6.15617	7.06685285489062e-05	0.00259585969841087	1.81279583526875	Down
Epn3	1.53597	7.48278	6.15565594995824	7.07203371239567e-05	0.00259585969841087	1.81204250086844	Up
Pld2	1.01887	9.54598	6.15408826370728	7.08776928388817e-05	0.00259706330052345	1.80975780680645	Up
Nufip1	0.880869999999998	10.8572	6.14888954784602	7.14021920089141e-05	0.00261169175648044	1.80217884387527	NS
Zyg11a	-1.02469	5.40286	-6.14707	7.1587169701742e-05	0.00261387198093103	1.79951918175275	Down
Stard13	1.70392	9.86534	6.13705589511793	7.26116044285363e-05	0.00264664220407439	1.78491263893582	Up
Sqstm1	1.05404	13.4098	6.13063523841654	7.32769376887858e-05	0.00266122185323601	1.77553598639548	Up
Ccdc171	-1.43168	7.82179	-6.13043	7.32978107433348e-05	0.00266122185323601	1.77524319564719	Down
Lmna	1.75262	11.4705	6.12950690777526	7.33945304624061e-05	0.00266122185323601	1.7738875731141	Up
Ppat	-1.00161	6.85626	-6.12556	7.38078833879352e-05	0.00267156347353309	1.76811404763408	Down
Trem1	2.05776	5.7877	6.11805860337629	7.45991088526426e-05	0.00269430230810582	1.75715203667093	Up
Dennd6a	-0.807075	12.9727	-6.11716	7.46945529322828e-05	0.00269430230810582	1.75583756103924	NS
Rapgef3	0.937818749999999	7.78843	6.11317438517514	7.51194272149289e-05	0.00270476147065559	1.75000637634415	NS
Proz	-0.851744	8.68506	-6.11201	7.52439758731949e-05	0.00270476147065559	1.74830324811788	NS
Map2k3	1.51021	12.1876	6.10587044358587	7.59047600393973e-05	0.00272381814468398	1.73931423170203	Up
Kbtbd11	-1.31379	11.1836	-6.10074	7.6462057896618e-05	0.00273634602426197	1.73179351424426	Down
Mmp14	0.886344750000001	9.85753	6.10023787534689	7.6516366835087e-05	0.00273634602426197	1.73106354507906	NS
Lmo3	-1.09242	5.296	-6.09335	7.72710901391286e-05	0.00275860438066899	1.72097246599837	Down
Flnb	1.04659	15.0282	6.09119597559394	7.75091965366926e-05	0.0027623747668265	1.71780925764708	Up
Pmepa1	1.11113	11.9382	6.08915744992455	7.77349268089584e-05	0.00276569196081907	1.71481940920697	Up
Dcun1d2	-1.17838	8.11749	-6.08315	7.84041607040916e-05	0.00278475016442863	1.70600593046005	Down
Cd163	1.12979	6.45251	6.08193868630492	7.8539933357424e-05	0.00278482835130771	1.70422703849811	Up
Map3k6	1.53488	8.43273	6.07965311675236	7.87966610906715e-05	0.00278918775395485	1.70087176939929	Up
Cd200l1	-1.67139	12.6185	-6.07791	7.89928800043139e-05	0.00278962737176806	1.69831466259548	Down
Atf4	0.768050000000002	14.2361	6.07716920343465	7.90766836162369e-05	0.00278962737176806	1.69722447363613	NS
Faxc	-1.17153	7.04904	-6.0734	7.95036395085891e-05	0.00279821282136339	1.69168811380781	Down
Apol7a	-3.22756	9.42856	-6.07265	7.9588479210921e-05	0.00279821282136339	1.69059152870448	Down
Ccl11	2.60088	12.9446	6.06767476295652	8.01568597282236e-05	0.00281345179877733	1.68327495876334	Up
Il1b	3.48314	8.83016	6.05947166482431	8.11028005372994e-05	0.00284186939227253	1.67121226022486	Up
Rad51c	-1.56378	7.20045	-6.05187	8.19895582166218e-05	0.00286812130748045	1.66003115713251	Down
Cmah	-1.79977	9.27819	-6.04591	8.26925303799202e-05	0.00288304912026374	1.65125286595417	Down
Arfgef3	1.18067	8.23516	6.04591021990389	8.26928569196468e-05	0.00288304912026374	1.6512488056616	Up
Arih2	0.966247500000001	11.8829	6.04314	8.30215194505826e-05	0.00288967555763806	1.64717021298287	NS
Rhbdf2	0.957164750000002	8.49105	6.03967186145715	8.34354320763961e-05	0.0028992422056013	1.64205657068786	NS
Eif2ak4	0.853778000000002	8.65155	6.03591464254145	8.38860976917021e-05	0.00291005199796056	1.63651759116673	NS
Pappa	1.45225	9.0017	6.03453576622853	8.40521399588282e-05	0.00291096854817543	1.63448430869252	Up
Zfp449	-0.992599	5.16294	-6.03076	8.45081801325051e-05	0.00292190886829618	1.62892040352386	NS
Skp2	-1.12214	7.49341	-6.02761	8.48914867921525e-05	0.00293030233134038	1.62426702206854	Down
Sik3	0.88951	11.7101	6.02346036076528	8.53986101044406e-05	0.00294293491250823	1.61814263106274	NS
Ceacam18	-2.11004	11.6967	-6.00337	8.79006904763271e-05	0.00302416088406096	1.5884476577904	Down
Capn2	1.44481	11.949	5.99949136146757	8.83920064779109e-05	0.00303605427192416	1.58271591712404	Up
Ogt	-1.03486	12.758	-5.98857	8.97932425061659e-05	0.00307548415998853	1.56654205892901	Down
Plin2	1.44868	11.0679	5.98824435105757	8.98349970470053e-05	0.00307548415998853	1.56606398069322	Up
Icos	1.22735	9.36747	5.98633538363168	9.0082401193601e-05	0.00307889833194326	1.5632358147899	Up
Sntb2	1.52656	9.42399	5.98510245192424	9.02425765147581e-05	0.00307932484084483	1.5614089267547	Up
Il34	1.25106	7.55475	5.98230671707094	9.06069083578077e-05	0.00308670495482342	1.55726555207287	Up
Usp6nl	0.956867500000001	12.1843	5.97420320770789	9.16718233977666e-05	0.00311788881895601	1.54524949100111	NS
2010315B03Rik	-0.87751	11.939	-5.97109	9.2084365558968e-05	0.00312681911651291	1.54063195969688	NS
Entpd1	1.30573	11.5709	5.96733783078788	9.25844743022112e-05	0.00313410042278801	1.53506193167276	Up
Tril	-1.49096	6.58476	-5.96714	9.26104868330766e-05	0.00313410042278801	1.53477303635595	Down
Batf2	-2.12948	9.00935	-5.9661	9.27497702940287e-05	0.00313410042278801	1.53322753086619	Down
Lgi2	-0.983336	6.99426	-5.96431	9.29897176765882e-05	0.0031371239867948	1.53057047508462	NS
Elk3	-1.23296	7.01575	-5.96225	9.32668313149137e-05	0.00314138960595256	1.52751036651863	Down
Lrrc56	-0.963354	6.0105	-5.95968	9.36145634996716e-05	0.00314801618452364	1.52368325343321	NS
Ndrg1	2.42477	11.2175	5.95654606930154	9.40387179647518e-05	0.00315718716722562	1.51903421862907	Up
Clec4d	2.31227	6.50321	5.95114574769441	9.47755632194913e-05	0.00317680983531057	1.51100744345605	Up
Gm14288	-0.92792	14.3965	-5.94962	9.498460112926e-05	0.00317870617808016	1.50874165035679	NS
Zfp1009	-0.924532	14.4047	-5.9475	9.52764059449753e-05	0.00318045073986753	1.50558704931492	NS
Gtpbp4	0.931519999999999	11.1027	5.9470259561937	9.5341825143518e-05	0.00318045073986753	1.50488114926672	NS
Zfp607b	-0.832763	11.0914	-5.93752	9.6662424286483e-05	0.0032193528497586	1.49073386354473	NS
Cdc42ep3	-1.022	8.81191	-5.93526	9.6978629792361e-05	0.00322473277917215	1.48737507406763	Down
Ssh1	1.37794	7.99415	5.93082074726322	9.76044596472208e-05	0.00324037480761928	1.48075953102462	Up
Rgs4	1.47753	7.75079	5.92758672743252	9.80628194342303e-05	0.00325041609282077	1.47594111102557	Up
Cxcl16	1.32044	12.7593	5.92076768676923	9.90368228485813e-05	0.0032774900310636	1.46577634785105	Up
Phf11b	-1.39609	7.5313	-5.9114	0.00010039185126631	0.00331706768153931	1.45180005013447	Down
Mxd1	-0.905315	15.4269	-5.90666	0.000101085273361685	0.00333047046323049	1.44472054248937	NS
Steap4	2.39798	8.94772	5.90568972814414	0.000101227292714414	0.00333047046323049	1.44327657956947	Up
Invs	-0.863632	7.18527	-5.90535	0.000101276717045812	0.00333047046323049	1.44277453888557	NS
P2ry14	-0.843419	8.26271	-5.90403	0.000101472282988648	0.00333164665831547	1.44079042354976	NS
Cnksr3	0.929038	8.36884	5.9008893086727	0.000101935470783127	0.00334159218609655	1.43610634591855	NS
Mterf3	-0.859277	11.6592	-5.89901	0.000102213484146516	0.00334378131753938	1.43330508131683	NS
Rab7b	1.37946	8.10695	5.89764274050034	0.000102417409906563	0.00334378131753938	1.43125515887479	Up
Tasor	-1.37361	10.4671	-5.89681	0.000102542134027726	0.00334378131753938	1.43000340349739	Down
Lamc2	1.47642	9.58362	5.89612346086923	0.000102643773956794	0.00334378131753938	1.42898444980148	Up
Fryl	-0.822827	12.9242	-5.88766	0.000103914583806135	0.00337414733497129	1.41632882020085	NS
Cytip	2.08487	8.99288	5.88701071649615	0.000104012759114517	0.00337414733497129	1.41535756351708	Up
Abhd18	-1.06575	7.78348	-5.88669	0.000104061429151832	0.00337414733497129	1.41487640619914	Down
Chrm4	-1.64227	6.56398	-5.88407	0.0001044592478962	0.00338178704873894	1.41095193483498	Down
Bhlha15	-1.3995	7.57353	-5.88031	0.000105032432618801	0.00338449920158409	1.40532365896853	Down
Mpv17l	-0.82481	5.95423	-5.87996	0.000105084786408735	0.00338449920158409	1.40481111137689	NS
Lyve1	1.37141	10.4567	5.87979524094103	0.000105110521588223	0.00338449920158409	1.40455925552509	Up
Zfp825	-0.997635	12.337	-5.87926	0.00010519235851247	0.00338449920158409	1.40375877241876	NS
Pdk4	1.51492	7.84019	5.86944935083152	0.000106706138096404	0.00342524949035546	1.38906297034975	Up
Klf9	2.06166	12.0269	5.86892635866824	0.000106787479914195	0.00342524949035546	1.38827921023978	Up
Tti1	-0.996969	9.45251	-5.86699	0.000107089300308062	0.00342965410464329	1.38537625660845	NS
Tpst2	1.02973	9.40463	5.86394969566726	0.00010756482198248	0.00343959965262688	1.38081916159859	Up
Cryab	2.18055	8.75144	5.86270119835337	0.000107760778507729	0.00344058877658137	1.37894709330703	Up
Adgrg1	1.30284	9.86904	5.85973035576792	0.000108228594716811	0.00345024154625503	1.37449153378406	Up
Agpat4	1.08143	11.3343	5.85021497666005	0.000109741593595305	0.00348907012532443	1.36021211224137	Up
Ndst1	1.09323	12.3712	5.84955569789759	0.000109847254002847	0.00348907012532443	1.35922226785731	Up
Fbxo25	-0.92099	12.4103	-5.84892	0.000109948634099388	0.00348907012532443	1.35827341602567	NS
Slc22a1	0.8495	9.6036	5.84646325352729	0.000110344318149215	0.00349630499862155	1.35457841586813	NS
Arl14	2.74546	8.8721	5.84300295906255	0.000110903350595822	0.00350868582180925	1.34938052871575	Up
Tmem154	-1.24111	6.59652	-5.83402	0.000112368547281123	0.00354824894266501	1.33588036885888	Down
Cacna1a	-0.957535	6.59131	-5.83326	0.000112494246779297	0.00354824894266501	1.33473039157982	NS
Aplf	-1.02315	7.72882	-5.8288	0.000113230198663622	0.00356606708751943	1.32802310395751	Down
Gm14403	-1.11335	10.1496	-5.82446	0.00011395064131524	0.00358040667396028	1.32149922526465	Down
Gon4l	-0.771477	9.68191	-5.8237	0.000114078098948393	0.00358040667396028	1.32034934072124	NS
Zfp964	-0.99888	5.32045	-5.82296	0.000114200702104829	0.00358040667396028	1.31924446254394	NS
Plvap	1.41514	10.1503	5.82080092897967	0.000114562776520944	0.00358636535688462	1.31598841693147	Up
Slc19a2	0.864639000000004	9.59382	5.81834566417297	0.000114975291318688	0.00359388283163918	1.3122912817476	NS
Sema4c	2.01081	7.78975	5.81527063207777	0.00011549416730636	0.00359992447951532	1.30765966881979	Up
Shb	1.06793	7.99745	5.81515393032186	0.000115513908427059	0.00359992447951532	1.30748386564791	Up
Banp	-1.42667	9.69675	-5.81401	0.000115707004489788	0.00360056020389192	1.30576584350042	Down
Myof	0.835585500000001	10.4674	5.8097000942389	0.000116440492413834	0.00361798483805667	1.29926583404685	NS
Tmem35b	-1.39108	7.76622	-5.79714	0.000118605035137493	0.00367975651425833	1.28032000042349	Down
Slitrk6	-1.71369	11.2201	-5.79026	0.000119807765856478	0.00371154845518828	1.26994151778246	Down
Riok2	0.851296250000003	10.2765	5.78591107917404	0.000120575698546586	0.00372979634866139	1.26336927436734	NS
Lrrc32	1.61889	7.91973	5.78218357239021	0.000121237690564065	0.00374471794158547	1.25773719631962	Up
Cd160	-1.1005	6.64072	-5.77851	0.000121893799679256	0.00375941394898344	1.25218541319222	Down
Apol10a	-1.2607	11.6285	-5.77513	0.000122501473795294	0.00377160619623959	1.24707004706984	Down
Rpl22l1	0.910792499999999	10.6228	5.77429804514413	0.000122650918559664	0.00377160619623959	1.24581591496227	NS
Cebpb	1.03498	7.31579	5.77139656153959	0.000123175321620345	0.00378215357947361	1.24142720405009	Up
Nos2	-1.4496	12.6442	-5.76399	0.000124525231758115	0.00381798023077199	1.23021519773764	Down
Fgf11	-1.21209	5.37211	-5.76147	0.000124988115403279	0.00382417167076377	1.22639855593274	Down
Polr1d	0.795349999999999	11.2079	5.76061881926246	0.000125144248072686	0.00382417167076377	1.22511437159918	NS
Gne	-0.814318	13.6325	-5.7599	0.000125277435422881	0.00382417167076377	1.22402017651038	NS
Cyyr1	1.30392	9.54559	5.75654023874973	0.000125898056574848	0.00383378206198648	1.21894	Up
Zcchc17	-0.94989	10.9725	-5.75621	0.000125960032253861	0.00383378206198648	1.21843051741297	NS
Vwf	0.826689	6.75544	5.74865224504425	0.00012736967347162	0.0038697605815436	1.20698242490581	NS
9030624G23Rik	-0.883589	8.0663	-5.74789	0.00012751333490913	0.0038697605815436	1.20582282859265	NS
Zfp974	-0.95654	10.3052	-5.74572	0.000127922054377326	0.00387652167400126	1.20253088393675	NS
Crebl2	-1.22305	8.22208	-5.73603	0.000129762342655045	0.00392606675076014	1.18783773993342	Down
Tep1	-0.969075	11.0242	-5.73514	0.000129933620702408	0.00392606675076014	1.18648084050157	NS
Mmp3	1.26205	6.20513	5.72882010392756	0.000131151129035232	0.00395711995550732	1.17688670959231	Up
Dock8	-1.3335	10.7174	-5.72752	0.000131403292548953	0.00395899891091491	1.17491075896624	Down
Adcy4	1.03165	5.35941	5.72579111561744	0.000131739115546041	0.00396338935067737	1.17228513063141	Up
Rorc	-1.06104	9.84433	-5.71831	0.000133204238339652	0.00400041132321782	1.16090781064048	Down
Tmc7	1.34886	8.84475	5.71754839860427	0.0001333534399557	0.00400041132321782	1.1597562206023	Up
Fmnl2	1.08934	9.77478	5.71655221329649	0.000133549962659951	0.0040005505337605	1.1582413538839	Up
Slc35e2	-1.03626	12.2563	-5.71538	0.000133782137539746	0.00400175578990842	1.15645453637779	Down
Tmem184c	-0.923501	9.53151	-5.71328	0.000134198347980869	0.00400845466626523	1.15325912714056	NS
Lmcd1	1.8795	7.34032	5.70831784409535	0.000135186251020204	0.00403218619101607	1.14571410348199	Up
Tppp	-1.44858	8.50117	-5.707	0.000135449758840536	0.00403427431723761	1.14371089650975	Down
Il15	-1.33378	9.65643	-5.70586	0.00013567926752823	0.00403534529057927	1.14196932533121	Down
Tle3	-0.778418	14.3336	-5.70417	0.000136019219426056	0.00403833609764922	1.13939508689101	NS
Ptafr	1.01976	8.03761	5.70343198443225	0.000136167215532994	0.00403833609764922	1.13827641586151	Up
Eps8l3	1.0811	15.0262	5.7021776044641	0.000136420285233783	0.00404009449835105	1.13636632922217	Up
Prlr	-1.20659	11.8896	-5.70023	0.000136814263893689	0.00404601501832558	1.13339974677977	Down
Atm	-0.977427	7.87313	-5.69448	0.000137984867856838	0.00407485341352298	1.12463545138211	NS
Agrn	-1.18016	10.2451	-5.6922	0.000138450784685114	0.00408282943408761	1.12116780176375	Down
Zfp971	-0.941683	14.5813	-5.68877	0.000139157140113208	0.00409750280234337	1.11593284261326	NS
Edn1	1.27703	6.09144	5.68732211005915	0.00013945571590299	0.00409750280234337	1.11372801352021	Up
Btc	1.95845	9.11616	5.68692439194287	0.000139537962955719	0.00409750280234337	1.11312149025362	Up
Zfp605	-1.14568	7.71956	-5.68515	0.000139906288192403	0.00410254036923123	1.1104096869298	Down
Ppp1r3c	-1.18013	6.67514	-5.6768	0.000141649286219315	0.00414229944610513	1.09767287627625	Down
Zfp518a	-0.996707	11.1486	-5.67675	0.000141659528278237	0.00414229944610513	1.0975984973095	NS
Slc38a2	0.873835	14.6731	5.6711290815777	0.000142846475147788	0.00416153494767617	1.08901497223468	NS
Hsd17b2	-1.33118	10.9532	-5.67019	0.000143045693666772	0.00416153494767617	1.08758129552084	Down
Fhdc1	2.15136	10.8629	5.6699767091627	0.000143091097469236	0.00416153494767617	1.08725482625207	Up
Gpatch11	-0.905144	8.95858	-5.6693	0.000143235124729621	0.00416153494767617	1.08621990466965	NS
Bbs4	1.07808	8.13529	5.66892205368164	0.000143315367280517	0.00416153494767617	1.08564376541096	Up
Sesn3	-0.902041	9.70334	-5.66459	0.000144240437436377	0.00416825957017124	1.07902498190918	NS
Arhgap31	0.800759999999999	10.6047	5.66435019870204	0.000144291893131497	0.00416825957017124	1.07865806869257	NS
Glt28d2	0.857146999999998	8.6616	5.66417035185815	0.000144330451934427	0.00416825957017124	1.07838320460497	NS
Cdkl2	-0.933697	5.42051	-5.66346	0.00014448188297155	0.00416825957017124	1.07730444754814	NS
Trex2	1.77785	4.94539	5.6631632224772	0.00014454658109424	0.00416825957017124	1.0768438988362	Up
Zfp977	-1.00923	4.80825	-5.66192	0.000144814358299064	0.00417021347538284	1.07493993630334	Down
Trappc13	-0.867078	12.2147	-5.66017	0.000145191331623892	0.00417386882201054	1.07226551968171	NS
Crot	-1.01263	12.4012	-5.65947	0.000145341683763233	0.00417386882201054	1.07120079091501	Down
Znrf1	1.11709	10.6679	5.65799134212245	0.000145661898714461	0.00417731076519642	1.06893683289132	Up
Plch1	-1.15769	9.42557	-5.65476	0.000146362651328956	0.00419164137027116	1.06399973976915	Down
H6pd	2.1985	10.0058	5.65128870604328	0.000147120960808573	0.00420757875431816	1.05868369075952	Up
Alas2	1.81681	6.26944	5.64737025043626	0.00014798114255987	0.00421572164698967	1.05268654253842	Up
Tph1	1.02057	7.21213	5.64730619752427	0.000147995247847455	0.00421572164698967	1.05258849185323	Up
Zfp397	-0.944482	9.5157	-5.64723	0.000148012290546138	0.00421572164698967	1.05247003468243	NS
Tmem140	-1.37124	9.31853	-5.64126	0.000149332199013929	0.00424245333574477	1.04333705067904	Down
Abcg2	-1.00555	15.2979	-5.64115	0.000149357798860217	0.00424245333574477	1.04316071396194	Down
Zfp973	-0.970645	14.2801	-5.63583	0.000150545492610091	0.00426385710342269	1.03501270142158	NS
Fgd4	-1.0678	11.7616	-5.63559	0.000150599981729106	0.00426385710342269	1.03464042997559	Down
Slc43a3	1.81047	12.5392	5.63372299438231	0.000151018994939563	0.00426385710342269	1.03178221007338	Up
Synpo	-0.814569	10.4367	-5.63352	0.000151065117971698	0.00426385710342269	1.03146807509151	NS
Efhd2	0.970625000000002	12.588	5.63321259994011	0.000151133886489969	0.00426385710342269	1.03099988417312	NS
Tbc1d5	-0.84747	11.2182	-5.62939	0.000151997364807821	0.00428242305253818	1.02513920047364	NS
Cdc20	1.04199	9.25179	5.62783936179212	0.000152349076651792	0.00428653967491661	1.02276156436912	Up
Frat2	0.841519	6.54649	5.62131510793657	0.000153838558801981	0.00431685884942745	1.01275286752872	NS
Synrg	-0.876117	11.46	-5.62131	0.000153840765750137	0.00431685884942745	1.01273810977454	NS
Tjp2	1.12033	12.4017	5.61732561481839	0.000154756980064429	0.0043365244248978	1.00662964552856	Up
Smarcad1	-0.743045	9.79866	-5.61646	0.000154957585330177	0.0043365244248978	1.0052970229564	NS
Hacl1	-0.907083	7.31019	-5.61504	0.000155286384656155	0.00433990058136216	1.00311653286753	NS
Mtnap1	-1.03552	8.03997	-5.60768	0.000157000937256847	0.0043771656283899	0.991820470177027	Down
Tnfrsf18	0.979773500000002	7.18221	5.60751801371542	0.000157039660896717	0.0043771656283899	0.991566772481383	NS
Adgrl4	0.995535	11.3144	5.6051538881096	0.000157595239067362	0.00438678656784438	0.987933777301441	NS
Bag2	1.20522	7.78726	5.60087136388295	0.000158606976067985	0.00440906245872189	0.981350682042614	Up
Gbp2b	1.22363	8.0743	5.59176617205299	0.000160781076952574	0.00446354816695635	0.967345354866044	Up
Zranb3	-0.756703	7.66792	-5.58134	0.000163309842430537	0.00452772194791791	0.95129165130078	NS
Scoc	-1.10984	10.7424	-5.56689	0.000166884664838452	0.00462044414149123	0.929016279304737	Down
Slc27a2	1.25097	9.577	5.56603750972827	0.000167097457081126	0.00462044414149123	0.927705423282171	Up
Ctdsp1	-1.03042	13.6919	-5.56421	0.000167556226356572	0.00462699306398434	0.924884955427714	Down
Timp1	1.18622	4.85468	5.56147716749676	0.00016824427545211	0.00463492305055774	0.920669344532244	Up
Il2rb	1.6948	7.61542	5.56130390540775	0.000168288011380508	0.00463492305055774	0.920401961888139	Up
Atp23	-0.861221	6.52079	-5.56013	0.000168584765070652	0.00463697066881006	0.918589571226654	NS
Pdlim4	0.919984499999999	6.16379	5.55620139333082	0.000169581452843365	0.00465330734111031	0.912525682223192	NS
Sass6	-0.880957	11.4423	-5.55603	0.000169625093733217	0.00465330734111031	0.912260984560361	NS
Apol8	0.902755	6.52708	5.54902239106196	0.000171419184025785	0.00469622444324312	0.901437736000932	NS
Jund	1.07065	13.3986	5.54816516934377	0.000171640031932048	0.00469622444324312	0.900113261416019	Up
Nop53	0.933410000000002	11.6676	5.54468954874171	0.000172538566595099	0.00471462198550619	0.894742066481253	NS
Pcmtd1	-0.818965	11.1935	-5.538	0.000174281819533671	0.00475186332750949	0.884400713387643	NS
Bdkrb2	1.14411	7.73645	5.53771297881928	0.000174357304693019	0.00475186332750949	0.883955259615036	Up
Gramd1a	1.29244	7.92987	5.53603726540723	0.000174797177231383	0.00475763230822076	0.881363310790752	Up
Gpx1	0.749515000000001	15.2166	5.53045481734162	0.000176271089331526	0.00478560652523803	0.872725599100163	NS
Zfp109	-0.967423	8.03751	-5.53041	0.000176284033353293	0.00478560652523803	0.872650062454853	NS
Tdrd3	-0.768088	10.3942	-5.52643	0.000177340693890964	0.00480803137442485	0.866502412105288	NS
Tra2a	-0.91083	14.1987	-5.52491	0.000177748870112706	0.00480999732088861	0.864137449319593	NS
Ldlrap1	1.30137	7.91776	5.52443749274422	0.000177874619137854	0.00480999732088861	0.863409957217629	Up
Dctn4	0.790524999999997	10.3324	5.51409581417423	0.000180666840961763	0.00487710538591199	0.847387394693339	NS
Gimap1	-0.909205	6.43709	-5.51352	0.000180824138486736	0.00487710538591199	0.846492162629692	NS
Avpi1	0.833002499999999	6.55307	5.50708275465171	0.000182586815972684	0.00491828491758978	0.836513130556728	NS
Tnfaip3	1.66098	11.9209	5.50615056433254	0.000182843650430961	0.00491884808752916	0.835067165839139	Up
Gja1	1.53299	11.4165	5.50485434735491	0.000183201418483574	0.00492212161593304	0.83305633339147	Up
F8a	0.861527000000001	8.30962	5.49836878490707	0.000185002696683232	0.00496026062338498	0.822991579368955	NS
Slc4a4	-1.15812	12.3436	-5.49779	0.000185163986577807	0.00496026062338498	0.822095149569515	Down
Donson	1.0592	11.1171	5.49667994871836	0.000185474828894635	0.00496026062338498	0.820369726925135	Up
Ift80	-0.818731	7.38023	-5.49633	0.000185572607138965	0.00496026062338498	0.819827577844459	NS
Zfp953	-0.887327	10.0615	-5.49395	0.000186239403348922	0.0049677304313857	0.816138008810472	NS
Tmem63a	0.74306	12.7483	5.49363750005444	0.000186328610357505	0.0049677304313857	0.815645404238835	NS
Zbtb40	-1.53856	6.44196	-5.49156	0.000186915045954709	0.00497700101291152	0.812412946441438	Down
Iigp1c	-0.785078	7.86809	-5.48888	0.000187672624931755	0.0049907991801048	0.808252127349812	NS
R3hdml	0.84958	5.36371	5.48569048851124	0.000188578477357291	0.00500158723545568	0.803298956644579	NS
Cotl1	0.895073500000002	10.4813	5.48520832024141	0.000188715908473076	0.00500158723545568	0.802549568382488	NS
Or2m13	-1.83916	10.2345	-5.48448	0.000188922636143029	0.00500158723545568	0.801423345726354	Down
Txlng	-0.980619	9.23868	-5.48408	0.000189037879108786	0.00500158723545568	0.800796053758171	NS
Nos1ap	-0.86759	12.5196	-5.46722	0.00019392015225408	0.00512426014492434	0.7745663790513	NS
Rab31	0.797339999999998	11.3745	5.46594618556419	0.00019429407685038	0.00512680224016895	0.772584817108437	NS
Cxcr2	1.40299	7.52708	5.4645190948984	0.000194714260093582	0.00512680224016895	0.770362661993278	Up
Mark1	0.924827249999998	7.78788	5.46438409362908	0.000194754058909962	0.00512680224016895	0.77015243325562	NS
Mdfi	1.05568	5.18297	5.46257967621725	0.000195286837135954	0.0051295998978919	0.767342278412061	Up
Slc30a2	1.39985	9.43711	5.46231364753991	0.000195365516447293	0.0051295998978919	0.766927932233116	Up
Hoxc6	-1.30901	8.31846	-5.46091	0.000195779959182891	0.0051295998978919	0.764748119119089	Down
Phlda1	2.88488	9.78444	5.45988851732369	0.000196084314715796	0.0051295998978919	0.763150261846053	Up
5830417I10Rik	-0.813933	10.0422	-5.45987	0.000196090513627505	0.0051295998978919	0.763117743542587	NS
Lrrc8e	0.860577	4.34933	5.45544653778409	0.000197408190471273	0.005157598199418	0.756228708066418	NS
Gbp7	-0.801353	11.812	-5.45212	0.000198406487145742	0.00517719255381924	0.751040012978097	NS
Surf6	0.832545499999999	7.76292	5.44951881847155	0.00019918967287674	0.00518809890175278	0.746987622133835	NS
Nrip3	0.882467	6.65298	5.4488896725024	0.000199379752233285	0.00518809890175278	0.746006510432154	NS
Cmas	0.940917499999998	12.3552	5.44825737442425	0.000199570977946459	0.00518809890175278	0.745020425730933	NS
Acod1	2.1858	5.39916	5.44743102884488	0.000199821182952945	0.00518813430060517	0.743731632207036	Up
Ccr5	1.31651	5.47944	5.44368125545869	0.000200960749477682	0.00520095463270434	0.737882135629399	Up
Tmem260	-0.886599	8.78787	-5.44335	0.000201062834866989	0.00520095463270434	0.737359743183977	NS
Sting1	1.37974	9.6411	5.44306042124943	0.000201150087476852	0.00520095463270434	0.73691346352969	Up
Snx18	1.42228	8.01037	5.44187478601471	0.000201512201209656	0.00520095463270434	0.735063392161957	Up
Golim4	-0.752505	14.2224	-5.44171	0.000201562249663058	0.00520095463270434	0.734807951870809	NS
Ajuba	-0.774221	5.94861	-5.43813	0.000202659310071007	0.00522279846189175	0.72922459678388	NS
Zfp281	0.828951249999999	9.53444	5.43347818769854	0.000204096556984773	0.00525334458836487	0.721955499495344	NS
Spry1	1.24896	8.06133	5.43167741935953	0.000204655376667841	0.00526123298168659	0.719143005115321	Up
Ldb3	-1.48638	9.6876	-5.42477	0.000206815570195399	0.00531021899384713	0.708342730857585	Down
C87436	-1.29553	5.7271	-5.42384	0.000207107074959666	0.00531030319388411	0.706893952899518	Down
Spred1	1.24632	11.0964	5.42274076402044	0.000207452757055728	0.00531030319388411	0.705178556378352	Up
Plp2	0.95842	15.1204	5.42232793610721	0.000207582958559909	0.00531030319388411	0.704533192127592	NS
Tasp1	-0.713525	9.25687	-5.41909	0.000208606727393969	0.00532995301401576	0.699472791991491	NS
Mep1a	-0.751585	14.8776	-5.41812	0.000208913538228492	0.00533116678184201	0.697961092463557	NS
Scaper	-0.82329	9.96966	-5.41733	0.000209165639960994	0.00533116678184201	0.696720614262119	NS
D16Ertd472e	0.862120499999999	6.51727	5.41619113709586	0.000209528700674125	0.00533389973181299	0.694936783935409	NS
Nbeal1	-0.951345	11.8564	-5.41335	0.000210435068610116	0.00534868574006399	0.690496982330608	NS
Hmg20a	-0.956095	8.83982	-5.41277	0.000210622619434627	0.00534868574006399	0.689580663433154	NS
Pde6d	-0.809514	8.90423	-5.40609	0.000212773259767969	0.0053967271203192	0.67913124551832	NS
Dedd2	0.846456	7.84902	5.39899361234359	0.000215085210982973	0.0054423769488123	0.66801531016746	NS
Neurl4	-0.875064	9.03753	-5.39896	0.000215095141532991	0.0054423769488123	0.667967822165532	NS
Slx4ip	-1.16947	8.68404	-5.39678	0.000215812878871187	0.00544825148732559	0.664541392126457	Down
Bach1	0.881599999999995	13.1369	5.39666368072836	0.000215849955802721	0.00544825148732559	0.664364699288554	NS
Podnl1	-0.783763	4.03612	-5.39105	0.000217704606998216	0.00548842001367086	0.655564769264691	NS
Yju2b	-1.00583	8.86073	-5.38296	0.000220408287362929	0.00554987002805519	0.642869886959203	Down
Fnip2	0.925927500000002	8.08108	5.38204115699122	0.000220715805901657	0.00555090933322515	0.641435845837816	NS
Asxl2	-0.733028	12.821	-5.37757	0.000222228207100726	0.00557952057746096	0.634412094295721	NS
Acsl1	0.958469999999998	9.45192	5.37709282166443	0.000222388680506022	0.00557952057746096	0.633669648414805	NS
Sema6d	-1.51683	11.7844	-5.37448	0.000223276758177638	0.00559506866736247	0.629570541684342	Down
Herc2	-0.852457	10.0136	-5.37011	0.000224772028194794	0.00562577672969178	0.622705545951105	NS
Tubd1	-0.838943	7.4508	-5.36664	0.000225967804102299	0.00564892415794825	0.617248387337033	NS
Cables1	1.55183	8.41042	5.36324274491331	0.000227142864057616	0.00567149888950567	0.61191385857893	Up
Cstb	1.11187	10.2744	5.35876372850202	0.000228703310648856	0.00570363076999761	0.604872298275287	Up
Mitd1	-1.22635	9.93111	-5.35674	0.000229413358917151	0.00570896011362482	0.601684091748426	Down
Ceacam12	2.20703	5.42898	5.35659016397943	0.000229464654190493	0.00570896011362482	0.601454152212961	Up
Acer2	1.20991	7.60979	5.35559691678057	0.000229813457569185	0.00571033298592221	0.599891946721105	Up
Nop14	0.744254999999999	10.7736	5.35487	0.000230067615145794	0.00571033298592221	0.5987551309305	NS
Manea	-1.00916	11.5426	-5.35364	0.000230502732217503	0.00571432992152523	0.596811820850153	Down
Pank1	-1.08322	9.07165	-5.34263	0.000234417550936649	0.00580447923928527	0.57949090789213	Down
Dst	1.10128	10.0801	5.33545587528669	0.000237009157677244	0.00585814677214618	0.568183063288487	Up
Syde2	-0.936089	9.22493	-5.33423	0.000237453535917131	0.00585814677214618	0.566256567095285	NS
Nek6	1.27971	11.8364	5.33404456512018	0.000237522249290596	0.00585814677214618	0.5659589988594	Up
Kif27	-0.889996	5.94697	-5.33353	0.000237708867055286	0.00585814677214618	0.565151271804759	NS
Ppp1r21	-0.837902	9.98679	-5.32892	0.000239395812914866	0.00589275478566947	0.557878436327953	NS
Cep290	-0.898371	7.34762	-5.3256	0.000240618133749595	0.00591036214162816	0.552640699871759	NS
Nlk	-0.80927	11.0466	-5.32543	0.0002406780880734	0.00591036214162816	0.552384476930764	NS
AW554918	-0.913428	7.54801	-5.32151	0.000242129760211131	0.00593901573016691	0.546199987732112	NS
Rnf32	-1.28459	9.0855	-5.31604	0.000244173442490065	0.0059768320847163	0.537556017172795	Down
Cpt1a	1.10966	12.7215	5.31584645333712	0.000244244852807247	0.0059768320847163	0.537255291035106	Up
Ssx2ip	-0.854703	11.0163	-5.3126	0.00024546436298084	0.00598774752523403	0.532133182800568	NS
Mgat4b	0.910662	9.78257	5.31249599423542	0.000245504394545554	0.00598774752523403	0.531965477028642	NS
Rasd2	-1.79418	6.71925	-5.31237	0.000245552502953384	0.00598774752523403	0.531763970847884	Down
Rbm10	-0.972303	9.46964	-5.30992	0.000246476709104331	0.0060032627431264	0.52790050930035	NS
Hykk	-1.32435	7.02396	-5.30362	0.000248876149336216	0.00605463108227628	0.517937442374854	Down
Tnip2	1.01555	8.52184	5.30268141841972	0.000249233791729123	0.00605548114305163	0.516460664671511	Up
Themis3	-0.914335	13.339	-5.30201	0.000249491980520953	0.00605548114305163	0.515395869230476	NS
Plek	2.20973	9.34007	5.29925376669954	0.000250550361673939	0.00606827967769837	0.511042504657891	Up
Zfp426	-1.07521	10.7472	-5.29912	0.000250601410259403	0.00606827967769837	0.510832995866604	Down
Adat2	0.947957000000001	8.3488	5.29813454516621	0.000250981852744063	0.00607044158684567	0.50927296435495	NS
Pmaip1	1.19646	11.6412	5.29592956515813	0.000251834240384265	0.00607836626555092	0.505786266663538	Up
Dusp8	0.968351250000003	8.72707	5.29577893344327	0.000251892582542856	0.00607836626555092	0.505548049923687	NS
Trip4	-0.937211	6.86718	-5.29273	0.000253075099865596	0.00609655367481583	0.500731587761412	NS
Tbccd1	-0.948489	6.23998	-5.29233	0.0002532311133575	0.00609655367481583	0.500097819039268	NS
Cutal	-0.85826	6.67665	-5.29118	0.00025368141497257	0.00610035042763912	0.498270763366234	NS
Map3k2	0.690704999999998	11.4105	5.28241179150579	0.000257127383777247	0.00617343376077983	0.48439565998007	NS
Grin2a	-0.891795	6.78949	-5.28194	0.000257312769826739	0.00617343376077983	0.483654495456606	NS
Kyat1	-1.55363	10.7676	-5.27699	0.000259282252759215	0.00621353527330675	0.475813449714391	Down
Ccnyl1	-0.73939	11.5747	-5.27453	0.000260266467104403	0.00622996047377693	0.471917347737478	NS
Cblb	1.0809	10.7265	5.26809891579516	0.00026286061470862	0.00628484054594039	0.461718451629915	Up
Lsm10	-1.00302	6.98264	-5.26724	0.000263206947231893	0.00628591253475113	0.460364477328746	Down
Tmco4	1.16757	8.74937	5.26227991563822	0.000265230098784816	0.00632698207044007	0.452490520329695	Up
Rnase6	-0.902757	12.5443	-5.2574	0.000267235235905255	0.00636752849530132	0.44474580116608	NS
C5ar1	1.17263	6.40038	5.2544248159817	0.000268464639541212	0.00638951971437754	0.440026033123059	Up
Ppfibp1	0.988883	5.18309	5.2496056853197	0.000270469708198384	0.00641031411514833	0.432374677688633	NS
Sfn	2.12869	11.7058	5.24880895839794	0.00027080272354536	0.00641031411514833	0.431109392256463	Up
P2ry6	0.850485750000001	8.66468	5.24848558816723	0.000270938009527685	0.00641031411514833	0.430595820829744	NS
Slc15a3	1.70087	9.08806	5.24843227020908	0.000270960322638893	0.00641031411514833	0.4305111406722	Up
Cyld	-0.815898	10.1122	-5.2483	0.000271016055822938	0.00641031411514833	0.430299658996335	NS
Ppil6	-2.42678	6.51034	-5.24675	0.000271666205785922	0.00641031411514833	0.427835853053169	Down
Tex9	-0.82856	7.36297	-5.24666	0.000271704933429256	0.00641031411514833	0.427689277336185	NS
Vmn1r112	-1.02054	5.78672	-5.24643	0.000271798056395565	0.00641031411514833	0.427336912770017	Down
Aloxe3	2.30199	7.12175	5.24473849547469	0.000272510885680238	0.00641986379157884	0.424643662716548	Up
Stk38	-0.858637	11.711	-5.24324	0.00027314219018926	0.00642747350254614	0.422264319037336	NS
Chac2	-1.05048	8.81498	-5.24187	0.000273723226431949	0.00643154194849165	0.420079295488152	Down
Fzd7	-0.885642	8.84255	-5.24137	0.000273932047113079	0.00643154194849165	0.419295146712192	NS
Pf4	1.03341	6.44595	5.23889419425881	0.000274983426008044	0.00644896450938325	0.415356155983032	Up
Tuft1	1.34472	10.2333	5.23565724500568	0.000276363095399606	0.00647403839998471	0.41021004783173	Up
Nras	0.843119999999999	10.8328	5.23293892592042	0.000277527376713845	0.00649401602368907	0.405887307999099	NS
Zfp970	-0.854458	13.396	-5.23163	0.000278089555769903	0.00649987572673398	0.403806549899897	NS
Gm4832	0.787647250000002	7.39409	5.22669738187315	0.000280220396038324	0.0065423460660728	0.395957872129796	NS
Rlig1	-0.755782	7.58402	-5.22431	0.000281258836055607	0.00655924549544	0.392154550383284	NS
Spice1	-0.904098	6.5733	-5.22063	0.00028286538827724	0.00658934131865049	0.386298122953082	NS
Cidec	1.46866	9.44599	5.21841263830209	0.00028383782157404	0.00660461466740755	0.382769438844389	Up
Ercc6l2	-0.785753	10.557	-5.21665	0.000284612625971295	0.00661526046697385	0.379966551084912	NS
Atp10a	0.894124750000001	8.21759	5.21346627049187	0.000286021143698104	0.00664059557345409	0.37489069958819	NS
Lrrc58	0.705355000000001	12.7356	5.20622757850489	0.00028924841657562	0.00670805365649066	0.3633544121552	NS
Ccdc8	-0.746379	4.24932	-5.20436	0.000290086000562678	0.00672000336192364	0.360381436888545	NS
Zbtb6	-0.928234	7.5841	-5.20113	0.00029154262274787	0.00674253653706117	0.355231628883599	NS
Mmp8	2.24797	6.39333	5.20077352508522	0.000291705499373072	0.00674253653706117	0.354657390395347	Up
C130050O18Rik	0.878559749999999	5.40574	5.19908764371361	0.000292469463583001	0.00674997694791176	0.351968234451602	NS
Plek2	0.817547	11.3614	5.19852888768263	0.000292723133496136	0.00674997694791176	0.351076871656036	NS
Tgfbr2	1.14167	11.292	5.19792256106663	0.000292998663622243	0.00674997694791176	0.350109571215675	Up
Gas1	-0.964908	5.00595	-5.18773	0.000297672602823782	0.00684498504126776	0.333838225961418	NS
Sat2	-1.14824	7.58008	-5.1875	0.000297779338693935	0.00684498504126776	0.333469643585372	Down
Fam220a	1.03363	8.07776	5.18603650410359	0.000298455817426837	0.00685181746448243	0.331136687292335	Up
Zfp654	-0.831514	9.12065	-5.18544	0.000298733851753779	0.00685181746448243	0.330179372540078	NS
Hint3	-0.755275	12.0392	-5.18269	0.000300013707208381	0.00687361074899728	0.325784114689688	NS
Tcp11l2	1.30241	6.4832	5.17880188708448	0.000301829996695055	0.0069059289396013	0.319578781675087	Up
Cdk17	0.852281250000001	9.29227	5.17809442959451	0.000302162111535241	0.0069059289396013	0.318448161754083	NS
Gbp11	-0.80329	9.12301	-5.17755	0.000302418011504436	0.0069059289396013	0.317577849327837	NS
Nemp1	-1.41806	10.0147	-5.17245	0.000304826796227513	0.00695331933757923	0.309421577359004	Down
Zfp235	-0.849529	5.94357	-5.17096	0.000305534173654308	0.00696183823663243	0.307038623053036	NS
Rpl38	0.829387500000001	13.4353	5.16996333695204	0.000306007140529157	0.0069650031363454	0.30544841295267	NS
Il6ra	0.989556250000003	7.66391	5.16246019558167	0.000309601194995853	0.00703912248033647	0.293444325612838	NS
Mtrf1l	-0.675835	10.7305	-5.15875	0.000311392999042517	0.0070666463113073	0.2875117815949	NS
Gcnt1	-1.70791	10.4926	-5.15808	0.000311720092397704	0.0070666463113073	0.286432489957183	Down
Bod1l	-0.83797	11.4432	-5.15786	0.000311828605995622	0.0070666463113073	0.286074684361656	NS
Unc45a	0.910906999999998	9.41618	5.15553144558627	0.000312959811603341	0.00708458101207172	0.282352132866377	NS
Slc39a2	-0.727052	5.61175	-5.15426	0.000313579116543988	0.00709090130241389	0.28031984177095	NS
Endod1	-1.39003	10.6231	-5.15137	0.0003149957722422	0.00711521869499201	0.275686070986619	Down
Zfp709	-0.81499	7.45563	-5.14955	0.000315887862812902	0.00712013910205884	0.272778814396641	NS
Zfp1003	-0.903265	13.8943	-5.14954	0.000315896621871765	0.00712013910205884	0.272750310078967	NS
Ctsl	1.29272	10.1676	5.14873631678357	0.000316291136524937	0.00712133251124018	0.271467274425673	Up
Por	1.37588	12.637	5.14577220502109	0.000317756036257004	0.00714222574505018	0.266717136926892	Up
Ccdc120	1.0619	9.47032	5.14547313293472	0.000317904239599336	0.00714222574505018	0.266237790150857	Up
Sema3f	0.858796	8.43346	5.14473326831223	0.000318271189436866	0.00714277290481079	0.265051895718933	NS
Helq	-0.917786	7.48509	-5.14353	0.000318867523354338	0.00714846128431677	0.263127605813246	NS
Acvr1c	-1.37278	7.86306	-5.14122	0.000320017500541458	0.00716653584187848	0.259426943514483	Down
Hoxb8	-0.972282	5.59999	-5.13906	0.000321101160821915	0.00718308809224905	0.255951865482595	NS
Ppox	-0.819209	9.1194	-5.13511	0.000323084907377638	0.00721310829170821	0.249620732535966	NS
Dusp19	-0.938586	9.19949	-5.13501	0.000323135073358697	0.00721310829170821	0.249461133106819	NS
Has1	1.42792	6.84275	5.13432301954896	0.000323482148652673	0.00721313295963592	0.248357617872765	Up
Nfatc2	0.915689	5.62314	5.13255839063217	0.000324374365480616	0.00722530036955701	0.245526277981442	NS
Poglut3	-0.788854	8.90083	-5.13098	0.00032517439308756	0.0072353905245278	0.242994117319395	NS
Orai3	-1.00788	7.99133	-5.12946	0.000325949601770521	0.00724490751312749	0.240546459056607	Down
Ifitm6	1.13864	6.79997	5.1257476154515	0.000327842470239667	0.00727766483251259	0.234594307708753	Up
Gm14322	-1.10662	11.9075	-5.1252	0.000328121489882576	0.00727766483251259	0.233719839984952	Down
Yap1	1.14544	9.36596	5.12268640014731	0.000329414028461589	0.00729856862847575	0.229678627929405	Up
Mlh3	-0.744656	5.92522	-5.12171	0.000329918697822442	0.00730199037250542	0.228105055702447	NS
Bhlhe40	1.03398	14.2346	5.11978544680194	0.000330910669565541	0.00730856439214151	0.225019079969074	Up
A1cf	-1.06557	14.0796	-5.11977	0.00033091682028786	0.00730856439214151	0.224999974304628	Down
Serpina3m	1.21294	5.5263	5.11863645733923	0.000331505436466192	0.00731381676707263	0.223173231547036	Up
Rad50	-0.783746	10.5424	-5.11705	0.000332326663298943	0.00732418456989394	0.22063001614668	NS
Itpr2	-1.2142	12.5562	-5.11366	0.000334094036397366	0.00735536068093842	0.215178024026649	Down
Ddx21	0.729029999999998	12.456	5.11180511836044	0.000335065068215839	0.00736895739159497	0.212194874688867	NS
Lmod1	-0.795286	8.78903	-5.10675	0.000337727720622434	0.00741968940701489	0.204059061571388	NS
Xpo6	0.798630000000003	12.3748	5.1026991401119	0.000339872956237862	0.00745895922589809	0.197550853400793	NS
Tbc1d4	-0.911251	9.73132	-5.10164	0.000340437992957822	0.00746350338083872	0.195843496458924	NS
Adcy8	-0.926629	9.39894	-5.10007	0.000341273625686265	0.00747396409866906	0.193323685213859	NS
Ddx19b	0.836581999999998	9.4878	5.09933729396947	0.000341666385817761	0.00747471403768572	0.192141470915559	NS
Zfp322a	-1.01934	9.38521	-5.09829	0.000342227895088747	0.00747915029843321	0.190453682367092	Down
Zfp595	-1.02689	7.86079	-5.09591	0.000343504489631857	0.00749918859092628	0.18662679025207	Down
Cspp1	-0.82659	10.2283	-5.09344	0.000344837021074781	0.00751277130317071	0.182647388684643	NS
Ddx3y	0.684647500000004	12.4249	5.09342015360487	0.000344847337384737	0.00751277130317071	0.1826166407584	NS
Vcl	1.37891	12.9575	5.09180628781658	0.000345720350082319	0.00752118855174932	0.180017946912186	Up
Trim13	0.959400249999999	5.38431	5.09137288881501	0.000345955193108907	0.00752118855174932	0.179320013031349	NS
Bcl2a1a	1.06686	8.39762	5.09016985908437	0.00034660795550482	0.00752753048366666	0.177382549037483	Up
Lrif1	-1.1596	9.13593	-5.08725	0.000348199585824587	0.00755422805916423	0.172673718809644	Down
Zfand5	1.1018	14.3882	5.08233800317359	0.000350889484195471	0.00760467240747543	0.164764491810836	Up
Nt5c3	0.792512000000002	10.5575	5.08109477557954	0.000351574261905399	0.00761160102436726	0.162760713887666	NS
Ptrh1	0.988962750000001	8.8086	5.07838694573872	0.000353070648403058	0.00763606841136447	0.158395608133943	NS
Ccdc66	-0.728454	10.1012	-5.07677	0.000353969969162165	0.00763977482581666	0.15578111358545	NS
Slc40a1	-2.43248	11.5607	-5.07676	0.000353974890006182	0.00763977482581666	0.155766826089107	Down
Rtp4	-1.15858	7.46242	-5.07412	0.000355440473693606	0.00766347304657497	0.151520390644754	Down
Cracd	-1.0769	11.5491	-5.06521	0.000360451139657166	0.00776347707718208	0.137133732237682	Down
Zkscan3	-1.03067	9.10781	-5.06381	0.000361240147053272	0.0077724415128108	0.134886612817009	Down
Nek1	-1.2357	9.69345	-5.06006	0.000363378179696455	0.0078103831633932	0.128822064482732	Down
Sephs1	-0.683598	8.6407	-5.05789	0.000364620531686868	0.00782901489715707	0.12531453110353	NS
Pbx3	-0.925962	8.31994	-5.05315	0.000367344942092597	0.00787939783712815	0.117664457788254	NS
Prrg1	-1.10454	7.41501	-5.05097	0.000368606940429119	0.00789834131655366	0.114140053519042	Down
Snx24	0.96421	7.9848	5.04784444738461	0.000370423091205058	0.0079291078321707	0.109089229983415	NS
Slfn10-ps	1.02783	7.31171	5.04667656640812	0.000371104253699564	0.00793428345962428	0.107201275186712	Up
Commd8	-0.824817	12.2649	-5.04613	0.000371425999165106	0.00793428345962428	0.106310711917744	NS
Nr2f2	-1.69866	10.9454	-5.04537	0.000371869044763189	0.0079356169030376	0.105085665319636	Down
Tbc1d2	0.872809999999999	8.01759	5.04445432212035	0.000372404029727532	0.00793890758260666	0.103608349653968	NS
Gbp10	-0.885155	11.5606	-5.04335	0.000373048981770961	0.00794453342282203	0.101830195053072	NS
Patj	-0.901142	12.2313	-5.04084	0.000374526851675406	0.00796786768426586	0.0977672521580812	NS
Etl4	0.731875000000002	14.3103	5.04010817040688	0.000374959995743969	0.00796895102065853	0.0965795026814495	NS
Ep300	-0.718842	11.7412	-5.03915	0.000375527341238026	0.00797288140272057	0.095025830734806	NS
Tmem198b	0.754540250000003	8.77177	5.03768294050788	0.000376394325888057	0.00797673230307548	0.0926561385764284	NS
Tbck	-0.863847	8.75187	-5.03755	0.00037647391175722	0.00797673230307548	0.092438884190468	NS
Rpl39	0.952234999999998	13.7548	5.03285724932682	0.000379265617775157	0.00802772473603478	0.0848470460810704	NS
Acsl4	1.25724	11.1805	5.03185732763313	0.000379863462940305	0.00803222448158461	0.0832285349282404	Up
Rmi1	-0.820478	11.3219	-5.0277	0.000382358368944323	0.00806882800681183	0.0765016748122207	NS
Rnf19b	0.736839999999999	12.6611	5.02768545975831	0.000382368558239248	0.00806882800681183	0.07647429237125	NS
Fn1	0.921149999999999	12.353	5.02212185514029	0.000385736557903358	0.00812412543897145	0.0674630704534067	NS
Lipg	-0.944121	7.4138	-5.02207	0.000385768343065938	0.00812412543897145	0.0673784042023291	NS
Dhx32	0.744732499999998	12.3392	5.01978647617617	0.000387159639762161	0.008145198112413	0.0636792391464702	NS
Clec4e	1.39872	6.89171	5.01261760826284	0.00039156281115345	0.00822952928401036	0.0520593594067043	Up
Hltf	-0.823507	10.8728	-5.01187	0.000392022027281576	0.00823088343080925	0.0508550497037152	NS
Ifi213	-2.4777	8.82528	-5.01071	0.000392746058328368	0.00823778930592369	0.0489591241287028	Down
Slc30a5	-0.866897	11.9887	-5.00685	0.000395146431136787	0.00827980697765918	0.0426985546326657	NS
Inava	1.31899	9.26185	5.00538656465055	0.000396057819840117	0.00828268353512679	0.0403314843520484	Up
Fgf9	-0.996659	8.45355	-5.00535	0.000396078252411215	0.00828268353512679	0.0402784792346189	NS
Jup	0.691562	14.9504	5.0045790424299	0.000396563171281159	0.00828451458721532	0.0390213318106154	NS
Trappc14	-0.76002	9.08457	-5.00282	0.000397668086728469	0.00829553664049838	0.0361625970086639	NS
Ints6l	-1.4421	9.77317	-5.00247	0.000397886548059781	0.00829553664049838	0.0355983176495824	Down
Itgb6	-0.752888	12.6084	-5.00146	0.000398522417685701	0.00830049339293625	0.0339576509113844	NS
Chd9	-0.901362	11.8747	-4.9981	0.00040064467974075	0.00833521531301395	0.0285007413791645	NS
Sun2	0.950647	5.85273	4.99670126761547	0.000401529018347372	0.00833521531301395	0.0262354176731883	NS
Tnfrsf9	1.00007	6.02929	4.99651615207193	0.000401646495198066	0.00833521531301395	0.0259348652026405	Up
Tkfc	0.984394999999999	12.2538	4.99629223959966	0.000401788641641279	0.00833521531301395	0.0255713159427096	NS
Cd300a	0.686477	6.43216	4.99527907243001	0.000402432495670426	0.00834027346146393	0.0239262285917139	NS
Cxcl3	1.18607	7.51973	4.99374910208572	0.000403406837977307	0.00834595192929123	0.0214417349936511	Up
Lmf2	0.829014249999998	10.433	4.99359188501874	0.00040350710080702	0.00834595192929123	0.021186414460419	NS
Creb3l4	-0.780175	9.82343	-4.99055	0.000405451946176482	0.00837786682441375	0.0162463866873415	NS
Gemin6	-0.907325	8.64825	-4.98896	0.000406474333471691	0.00838483084707101	0.0136589796989783	NS
Rpl7a	0.652022500000003	13.9571	4.98861353658152	0.000406695623228505	0.00838483084707101	0.0130998097171409	NS
Keap1	-0.764193	10.3078	-4.98815	0.000406995482624388	0.00838483084707101	0.0123425912423158	NS
Ube4b	-1.02909	11.4858	-4.98662	0.000407982664107656	0.00839687123788797	0.00985366254280162	Down
Syne3	0.794312249999999	8.2694	4.98462558174014	0.000409269020342846	0.00841503925555028	0.00661948640550403	NS
Dguok	-0.730823	9.35412	-4.98195	0.000411007210152243	0.00844245253641785	0.00226545886092655	NS
Ccdc167	-0.794766	7.322	-4.97949	0.000412610019123427	0.00846703374872473	-0.00173312	NS
Ercc1	0.682338	6.41666	4.97711063879865	0.000414165220560784	0.00848466299800893	-0.00559807	NS
Hcn4	1.0988	5.60827	4.97648379627123	0.000414576412879506	0.00848466299800893	-0.00661752	Up
Slx4	-0.689608	6.82586	-4.97631	0.000414689989686368	0.00848466299800893	-0.00689893	NS
Slc13a1	-1.1194	16.6729	-4.97222	0.000417385927677466	0.00853145020210538	-0.013556	Down
Dbn1	0.96193	5.87091	4.97092939839289	0.000418238848281035	0.00853506317564528	-0.0156532	NS
Fgl2	0.967962500000001	13.4855	4.97071419165224	0.000418381436304354	0.00853506317564528	-0.0160033	NS
Zfp607a	-0.740762	11.1107	-4.96488	0.000422264621549379	0.00860586030760802	-0.0254941	NS
Serpine1	1.85472	7.6077	4.96368836908067	0.000423064800711337	0.00861197155138111	-0.0274389	Up
Rpl35rt	0.682739999999999	13.1193	4.96263987785607	0.000423768452227845	0.00861197155138111	-0.0291461	NS
Ttll1	-0.727064	8.09164	-4.96199	0.000424206403516975	0.00861197155138111	-0.0302072	NS
Mmp10	1.79898	9.33652	4.96197285743298	0.000424216738609449	0.00861197155138111	-0.0302322	Up
Zswim6	0.925311750000001	9.8249	4.96009469084292	0.000425481696265294	0.00862282845550943	-0.0332908	NS
Flrt2	-1.09429	6.95077	-4.95995	0.000425578707886192	0.00862282845550943	-0.033525	Down
Cep19	-0.967366	8.48283	-4.95761	0.00042716462564222	0.00864655852428605	-0.0373459	NS
Tmem125	1.03228	7.57751	4.95671930248783	0.000427765066057314	0.00865031412437338	-0.0387888	Up
Pibf1	-0.72423	9.84965	-4.95469	0.00042914461807963	0.00866980246350989	-0.0420964	NS
S1pr1	1.5123	6.98178	4.95398084439585	0.000429627075566881	0.00867114704597668	-0.0432506	Up
Mmp16	-0.947972	6.39565	-4.95085	0.000431763802636034	0.00870105631814867	-0.0483467	NS
Ppara	-1.01067	8.97708	-4.94963	0.000432605185899255	0.00870105631814867	-0.0503465	Down
Smim9	-1.49874	6.12378	-4.94956	0.000432652536093118	0.00870105631814867	-0.0504589	Down
Rpl35a	0.672283	12.318	4.94937472532828	0.000432778329988017	0.00870105631814867	-0.0507575	NS
Spag9	0.955355	10.6575	4.94861273960936	0.000433301987464667	0.00870319184648444	-0.0519997	NS
Actmap	-0.713266	6.60942	-4.94505	0.000435761770527851	0.00874417435393183	-0.0578144	NS
Abraxas1	-0.789548	10.0906	-4.94015	0.000439162382871682	0.00879939243058589	-0.0657992	NS
Hnf4a	-0.71212	14.1642	-4.93962	0.000439535005975119	0.00879939243058589	-0.0666703	NS
Lekr1	-1.17329	8.36552	-4.93927	0.000439779697475682	0.00879939243058589	-0.067242	Down
Nudt13	-0.774888	10.1625	-4.9371	0.000441293775353838	0.00882122140206344	-0.0707722	NS
Hacd4	-1.01467	8.33343	-4.9341	0.000443403758454676	0.00885281724437552	-0.0756716	Down
Klhl38	-0.673585	4.9106	-4.93365	0.000443723632806006	0.00885281724437552	-0.0764123	NS
Prkcz	-0.81668	12.2537	-4.93303	0.000444159188945667	0.00885303530624112	-0.0774201	NS
Dzip3	-1.14488	7.56877	-4.92819	0.000447586145465744	0.00890459005657529	-0.0853144	Down
Cldn23	0.891982499999997	12.1944	4.92817502628576	0.000447599903078848	0.00890459005657529	-0.085346	NS
Ddx47	0.801531499999996	10.4095	4.92688690849725	0.00044851757963581	0.00890619343576845	-0.0874496	NS
Amn1	-0.891499	9.97202	-4.92674	0.00044862506523691	0.00890619343576845	-0.0876957	NS
Yes1	-0.680519	10.2041	-4.92626	0.00044896202700334	0.00890619343576845	-0.0884669	NS
Gbp8	-1.31792	10.7008	-4.91767	0.00045514422376645	0.00901922581580664	-0.102513	Down
Specc1l	0.715295000000001	12.8982	4.91714130874974	0.000455525194687725	0.00901922581580664	-0.103372	NS
Ptgr2	-0.870402	10.3346	-4.91637	0.000456085576220394	0.00902175349015084	-0.104635	NS
Adamts8	0.678125500000001	4.30047	4.91567736653581	0.000456587792964285	0.00902312691517761	-0.105765	NS
Tspo	1.05966	9.28132	4.91222101537324	0.000459106969985048	0.009064319334487	-0.111416	Up
Zfp111	-0.767131	9.08354	-4.91007	0.000460682370861558	0.00908681811740077	-0.114935	NS
Zfp60	-0.794518	11.0047	-4.90886	0.000461573369845678	0.00908866882297582	-0.116919	NS
Crybg2	0.887062500000003	10.8051	4.90875482796277	0.000461648054272694	0.00908866882297582	-0.117085	NS
Nudt12	-1.87688	8.3753	-4.90785	0.000462315420949545	0.00909322095412931	-0.118569	Down
Zfp1010	-0.763678	9.05551	-4.90599	0.000463686287813485	0.00910846010834323	-0.121609	NS
Bag3	1.7636	9.95986	4.90561328992971	0.000463963961583794	0.00910846010834323	-0.122224	Up
Zbtb16	2.26618	10.4934	4.90321431028103	0.000465740718634796	0.00912816139384484	-0.12615	Up
Tgds	-0.943857	8.29231	-4.90308	0.000465843144661658	0.00912816139384484	-0.126375	NS
Tlr8	1.09095	7.49331	4.8991689077013	0.000468753150178676	0.00917257326478431	-0.132771	Up
Lrrc8c	0.829193249999998	10.0273	4.89885260930939	0.000468989548671882	0.00917257326478431	-0.133288	NS
Plekhf1	0.820209499999999	7.26176	4.89760545077798	0.000469922890201934	0.00918221399983141	-0.13533	NS
Sowahc	1.55972	10.2229	4.89617840242808	0.000470993261877259	0.00919451171992413	-0.137667	Up
Fgfr4	1.25725	5.91488	4.88967112036513	0.000475906829465309	0.00928174133538094	-0.148324	Up
Zfp934	-1.04081	10.1968	-4.88907	0.00047636471652137	0.00928198876145237	-0.149312	Down
Frmd6	0.837640500000001	7.9707	4.88240615806055	0.000481456480828449	0.00936302719028007	-0.16023	NS
Krt19	0.72716	15.6887	4.88235005532004	0.000481499602032282	0.00936302719028007	-0.160322	NS
Meis2	-1.1902	9.68307	-4.88184	0.000481895152854084	0.00936302719028007	-0.161165	Down
Prkab2	1.15587	8.52353	4.88128359234578	0.000482320073018409	0.00936302719028007	-0.16207	Up
Lrch1	0.850862500000003	12.3571	4.87981609961363	0.000483451483847469	0.00936821898982308	-0.164476	NS
Poglut2	-0.899326	8.46976	-4.87977	0.00048348619276942	0.00936821898982308	-0.16455	NS
Dtx3l	-1.21946	11.4551	-4.87546	0.000486825221645229	0.00942415881716006	-0.171617	Down
Gin1	-1.10562	8.76387	-4.87418	0.000487820478064727	0.00943466525711641	-0.173714	Down
Dgke	0.815450250000001	6.57536	4.8719825954144	0.000489538528840971	0.00945911843170103	-0.177324	NS
B4galt3	0.985492749999999	10.8083	4.8685394296757	0.000492239581191278	0.00950250280394162	-0.182974	NS
Ihh	-0.658381	8.42665	-4.86668	0.000493706149421374	0.00952199769591696	-0.186028	NS
Adamts10	-1.09668	7.71437	-4.86374	0.000496034259161795	0.00955805755015182	-0.190859	Down
Zfp873	-0.657735	8.99087	-4.85761	0.000500921777157538	0.00964081108577171	-0.200926	NS
Parp14	-1.14261	10.8293	-4.85719	0.000501253739602692	0.00964081108577171	-0.201606	Down
Lyl1	-1.10813	5.92996	-4.85503	0.000502992183874769	0.00966533091392171	-0.205161	Down
Fpgt	-0.911843	10.0014	-4.8533	0.000504384236627696	0.00968315557039672	-0.207998	NS
Ifnlr1	0.999298	9.53853	4.84863821538305	0.000508162584577648	0.00974671731909787	-0.215661	NS
Fjx1	1.13747	5.01335	4.84784260116181	0.00050881034280853	0.00975017172538148	-0.216969	Up
Tnrc6c	-1.05926	10.6271	-4.84505	0.000511093204341935	0.00978471921155077	-0.221565	Down
Zmat1	-1.19644	7.02835	-4.84406	0.000511902836005005	0.00978471921155077	-0.22319	Down
Mapk14	-0.820073	12.0497	-4.84391	0.000512021135776387	0.00978471921155077	-0.223427	NS
Bcl9l	-0.817841	9.11957	-4.84142	0.000514071900046154	0.00979696643961967	-0.227531	NS
Ctsz	0.861545000000001	13.1456	4.84106239212389	0.000514365984842747	0.00979696643961967	-0.228118	NS
Arid5b	0.967784999999999	13.9189	4.8394428904081	0.000515702431524597	0.00979696643961967	-0.230782	NS
Gm5485	-1.09204	10.8418	-4.83942	0.000515721464829831	0.00979696643961967	-0.23082	Down
Ccnl1	0.844745	13.6886	4.83903838800834	0.000516036806550956	0.00979696643961967	-0.231447	NS
Cd33	1.00464	7.92363	4.8389467649652	0.000516112576933485	0.00979696643961967	-0.231598	Up
Tmcc3	1.37332	13.1241	4.8386322090198	0.00051637279755728	0.00979696643961967	-0.232115	Up
Fcgr4	0.976256	7.70841	4.83857368830969	0.000516421224861721	0.00979696643961967	-0.232212	NS
Cdc42ep2	-1.11549	6.78114	-4.83523	0.00051919976010276	0.00983208752305104	-0.23772	Down
Tnfrsf11a	-0.86253	10.9008	-4.83488	0.000519490348288954	0.00983208752305104	-0.238295	NS
Slc23a2	1.33366	9.62044	4.83464018762534	0.000519687296772135	0.00983208752305104	-0.238684	Up
Capn10	-0.978752	7.34596	-4.83296	0.000521091317479111	0.00984971249149771	-0.241454	NS
Atp8a1	1.00618	11.3573	4.82092860764675	0.000531243661131527	0.0100325172925102	-0.261261	Up
Osbpl1a	-1.25958	8.14514	-4.81707	0.00053454137296015	0.0100801639977924	-0.267614	Down
Gabarapl1	1.09798	11.3291	4.81684953870249	0.00053473362662758	0.0100801639977924	-0.267983	Up
Maf	-1.70158	12.1795	-4.81326	0.000537823600153392	0.0101292540556441	-0.273897	Down
Lrsam1	-0.703111	7.15629	-4.81083	0.000539931613588386	0.0101597781694082	-0.277913	NS
Sec22a	-0.77935	11.4636	-4.80799	0.000542400265483034	0.0101934044366807	-0.282595	NS
Anxa3	1.71649	7.9214	4.8076466770269	0.000542696480632912	0.0101934044366807	-0.283156	Up
Degs1	0.815327500000002	12.2639	4.80624303975734	0.000543921933628612	0.0102072262774284	-0.285471	NS
Gm14308	-1.07214	11.6557	-4.80519	0.000544843850051165	0.0102153322209683	-0.287209	Down
Dtx4	0.787401750000001	8.43257	4.80237147437767	0.000547317166103659	0.0102524848123048	-0.291858	NS
Prdm15	-0.767974	6.75854	-4.79869	0.000550563734965324	0.0103040424688438	-0.297928	NS
Smndc1	0.631923	11.3685	4.79765063475524	0.000551487434658714	0.0103120731167709	-0.299649	NS
Ogfod1	-0.63886	10.582	-4.79561	0.000553296137805724	0.0103366229185587	-0.30301	NS
Rtl6	-0.67247	5.19482	-4.79273	0.000555865833111084	0.0103753328151594	-0.307765	NS
Srf	0.941095000000001	11.019	4.78977358974522	0.000558520542739945	0.0104155588511495	-0.312655	NS
Arl6ip5	0.844767500000005	11.6304	4.7877761440866	0.000560318965899731	0.0104313385603515	-0.315955	NS
Ift81	-0.776342	7.42718	-4.78772	0.000560367364746205	0.0104313385603515	-0.316043	NS
Fpr1	1.14707	4.68582	4.78453896738642	0.000563246566036956	0.0104755822081218	-0.321303	Up
Sec14l2	-1.362	9.51701	-4.78319	0.000564471204380573	0.0104890019074247	-0.323532	Down
Phlda2	1.80009	5.66424	4.78163044562247	0.000565890689310986	0.0105003647578888	-0.32611	Up
Plpp3	0.753497499999998	12.0833	4.78097980364078	0.000566483973112424	0.0105003647578888	-0.327185	NS
Fancb	-0.691015	7.81429	-4.78086	0.000566593618524862	0.0105003647578888	-0.327384	NS
Zfp606	-0.68573	7.20863	-4.77749	0.000569674565336795	0.0105423493533474	-0.332949	NS
Cep78	-0.808893	7.61283	-4.77728	0.000569870388086841	0.0105423493533474	-0.333302	NS
Rel	0.98399	11.9357	4.77442975814626	0.000572493230874701	0.0105814817114421	-0.338014	NS
Tram2	-1.11318	11.6067	-4.77298	0.000573835825107882	0.0105842001293334	-0.340418	Down
Rps27rt	0.727524	13.3224	4.77293366093667	0.000573875206334988	0.0105842001293334	-0.340488	NS
Arhgap12	-0.763732	11.9771	-4.77262	0.00057416328583031	0.0105842001293334	-0.341003	NS
Ankmy2	-0.930207	9.42803	-4.77147	0.000575233868744855	0.0105945356741162	-0.342915	NS
Erg	1.21126	7.60618	4.77092058830203	0.000575740271417031	0.0105945356741162	-0.343818	Up
Zfp937	-0.787387	6.89053	-4.76634	0.000580004401102439	0.0106605854020136	-0.35139	NS
Smarcd1	0.735767249999999	9.78168	4.76597194863674	0.00058035226779632	0.0106605854020136	-0.352006	NS
Smox	1.01565	11.3102	4.76384203565568	0.000582349254273514	0.0106878517626307	-0.355531	Up
Psca	0.79075	5.39028	4.7628	0.000583325202618506	0.0106963475368454	-0.357249	NS
Pla2g4a	-0.769979	10.4785	-4.76131	0.000584734813399407	0.0107127733959264	-0.359726	NS
Ttf1	-1.03471	8.21891	-4.75991	0.000586056078465103	0.0107275532747313	-0.362042	Down
Tbrg1	0.852517499999998	13.365	4.75925840274369	0.000586671417726133	0.0107288087940813	-0.363119	NS
Hspb8	2.45475	8.39	4.7577024997299	0.000588146236951211	0.0107288087940813	-0.365695	Up
Ylpm1	-0.74928	11.0747	-4.75764	0.000588203497032615	0.0107288087940813	-0.365795	NS
Tas2r143	1.5554	4.5426	4.75748955930892	0.00058834838389007	0.0107288087940813	-0.366048	Up
Bmp8a	-0.896775	7.53376	-4.75712	0.000588697647869396	0.0107288087940813	-0.366657	NS
Vldlr	0.847815750000001	8.35164	4.75641448633218	0.0005893700818577	0.0107316828267696	-0.367828	NS
Trim12a	-0.972375	12.2891	-4.75528	0.000590452235917949	0.0107379246834598	-0.36971	NS
P2ry10	1.53228	7.26182	4.75447829900827	0.000591214858425885	0.0107379246834598	-0.371035	Up
Chac1	0.740951249999998	4.92022	4.75436041237042	0.000591327375688342	0.0107379246834598	-0.37123	NS
Setdb2	-0.698942	10.7042	-4.75346	0.0005921909374326	0.0107379246834598	-0.372727	NS
4931414P19Rik	-0.747371	5.02364	-4.75335	0.000592288041919456	0.0107379246834598	-0.372896	NS
Bcar3	0.985235000000003	11.3079	4.75247700972297	0.000593128057130234	0.0107438113493556	-0.37435	NS
Mpst	-0.735299	8.21147	-4.75145	0.000594110688176115	0.010752268869604	-0.376048	NS
Nfatc2ip	-1.0092	7.75177	-4.75007	0.000595433611276002	0.0107668650143047	-0.378331	Down
Ndel1	1.21784	12.3657	4.74895680406477	0.000596509154626195	0.0107769665206252	-0.380182	Up
Knl1	-0.646917	9.60729	-4.74731	0.000598095453174214	0.010796270219246	-0.382907	NS
Mkks	-0.775917	11.5512	-4.74563	0.000599722694963483	0.0108100191763209	-0.385695	NS
Ubn2	-0.68327	11.9488	-4.74545	0.000599894104609494	0.0108100191763209	-0.385988	NS
Plau	2.30461	8.7893	4.74468716436572	0.000600637333915063	0.0108140654359198	-0.387259	Up
Stradb	-0.787202	11.2246	-4.74052	0.000604690771175772	0.01086232050511	-0.39416	NS
Slc11a1	1.04221	8.32383	4.74052169119748	0.00060469380345364	0.01086232050511	-0.394165	Up
Ywhag	0.741435	10.2596	4.74033065923663	0.000604880526952502	0.01086232050511	-0.394482	NS
Penk	0.816959749999997	9.18714	4.73281732843938	0.000612272773073132	0.0109856067519808	-0.406944	NS
Golph3l	-0.951745	12.6584	-4.7274	0.000617657457968639	0.0110683977307679	-0.415928	NS
Trim34b	-1.18749	9.02213	-4.72711	0.00061794882050045	0.0110683977307679	-0.416411	Down
Ash1l	-0.66316	13.2141	-4.7256	0.000619467367609208	0.0110860730877977	-0.418929	NS
Zfp781b	-0.658495	9.35372	-4.71976	0.00062534858129015	0.0111671553021622	-0.428623	NS
Zfp114	-0.674208	7.86572	-4.71954	0.000625574253666951	0.0111671553021622	-0.428993	NS
Rapgefl1	-0.913495	5.46918	-4.71886	0.000626255309805721	0.0111671553021622	-0.43011	NS
Angptl4	1.58084	10.1744	4.71831757337447	0.000626809089785949	0.0111671553021622	-0.431016	Up
Rint1	-0.632278	11.697	-4.71797	0.00062716491013786	0.0111671553021622	-0.431598	NS
Epg5	-0.907973	9.17372	-4.71792	0.00062721180194887	0.0111671553021622	-0.431675	NS
Rps27a	0.621987499999999	13.635	4.71697017153952	0.000628178218789508	0.011174818842613	-0.433255	NS
Gadd45a	1.37432	12.1305	4.71607159203053	0.000629093037808123	0.0111815522124992	-0.434747	Up
Ppp1r14a	-1.24698	8.29293	-4.71544	0.000629739244716373	0.0111835038442007	-0.435801	Down
Aimp1	0.790283000000001	8.88112	4.71454567440017	0.000630649747055074	0.0111901417671074	-0.437283	NS
Tmem117	-0.859808	13.7679	-4.71232	0.000632927216199067	0.0112064556941805	-0.440981	NS
Slfn9	-0.866297	10.5788	-4.71221	0.00063303912807601	0.0112064556941805	-0.441162	NS
Bcl2a1d	1.01812	7.54621	4.71207227435336	0.000633181678149771	0.0112064556941805	-0.441393	Up
Slf2	-0.794496	10.0624	-4.70995	0.000635366191511918	0.0112355807691535	-0.444926	NS
Sh3gl2	-0.949404	9.15447	-4.70796	0.00063741556908978	0.0112622688135193	-0.448229	NS
Serpina3h	0.759661250000001	4.44957	4.70407340016404	0.000641443356979919	0.0113174162710304	-0.454691	NS
Lrrc57	-0.838713	10.1978	-4.70349	0.000642052117639441	0.0113174162710304	-0.455664	NS
Setd1b	-0.924527	11.2205	-4.70338	0.000642165257260732	0.0113174162710304	-0.455845	NS
Rad54b	-0.907185	6.45912	-4.70229	0.000643303061226876	0.0113209176928294	-0.45766	NS
Cdon	-0.949695	8.34297	-4.70215	0.00064344992402527	0.0113209176928294	-0.457895	NS
Tnfrsf10b	0.923811500000002	8.0145	4.70144316396087	0.000644184737873023	0.0113237758548921	-0.459065	NS
Cirbp	1.38639	10.0689	4.70095140885839	0.000644698639731256	0.0113237758548921	-0.459883	Up
Brms1l	-0.777583	7.50954	-4.69853	0.000647230990192974	0.0113586859549944	-0.463904	NS
Cenpa	0.670377500000004	11.7502	4.69760139397005	0.00064821102897279	0.0113663176981108	-0.465456	NS
Uck2	0.642544999999998	12.8013	4.69693160333261	0.000648915696997201	0.0113691120728526	-0.466571	NS
Tmem119	1.22114	8.10263	4.69626815219424	0.000649614490291919	0.0113715613600209	-0.467675	Up
Exoc4	-0.62917	13.4067	-4.69576	0.000650146344723721	0.0113715613600209	-0.468514	NS
Ifi30	0.853145	13.8656	4.69442389788923	0.000651561152232229	0.0113867547886754	-0.470744	NS
Filip1	1.07548	7.73353	4.69246343133201	0.00065363721285867	0.0114134692218513	-0.474007	Up
Zfp696	-0.648735	7.99266	-4.68986	0.000656408488594792	0.0114522682667053	-0.478346	NS
Tead4	1.12974	4.47218	4.6873417197541	0.000659093831576621	0.0114852998197259	-0.482534	Up
Gstp2	0.787137499999996	12.1966	4.68705238300942	0.000659403514998891	0.0114852998197259	-0.483015	NS
Arl4c	0.892045	6.84804	4.68567060545447	0.000660884574836324	0.0115014878971307	-0.485316	NS
Nt5e	-1.84889	8.46298	-4.68419	0.000662473317689854	0.011513071321328	-0.487779	Down
Zfp84	-0.756367	10.9937	-4.68355	0.000663159232563708	0.011513071321328	-0.48884	NS
Stc2	-1.66032	7.66725	-4.68351	0.000663206804015296	0.011513071321328	-0.488914	Down
Tubg1	-0.830518	8.03096	-4.67531	0.00067210465921395	0.011657828652206	-0.502582	NS
Clec2d	-0.87074	14.0878	-4.67362	0.000673948530296594	0.0116713455643372	-0.505392	NS
Icosl	1.39681	11.8167	4.67357146194327	0.000674003552182933	0.0116713455643372	-0.505476	Up
Ppip5k2	-0.825228	13.613	-4.67254	0.000675131511862088	0.0116811758429981	-0.50719	NS
Adck1	-0.694162	6.8388	-4.66768	0.000680493769449165	0.0117548909641738	-0.515303	NS
S1pr3	1.52223	7.88195	4.66765372225122	0.000680519612152035	0.0117548909641738	-0.515342	Up
Irgm2	-0.643493	11.3907	-4.66644	0.000681869596713589	0.0117684596207629	-0.517375	NS
Cxcl10	1.13013	7.91175	4.66524488591758	0.000683190945817511	0.0117720632899498	-0.51936	Up
Zfp623	0.676891750000001	9.46378	4.66522984201291	0.000683207663717169	0.0117720632899498	-0.519385	NS
Ttk	-0.959756	8.11657	-4.664	0.0006845805921221	0.0117859791619766	-0.521444	NS
Cep57l1	-0.747966	7.80201	-4.66184	0.00068698461995632	0.0118176091926314	-0.525039	NS
Nr2f6	-0.836009	5.78869	-4.66125	0.000687645138733248	0.0118192197011125	-0.526024	NS
Nat2	-1.02272	9.38579	-4.65963	0.000689458015931848	0.0118406179358839	-0.528724	Down
Parp10	-0.708487	11.299	-4.65548	0.000694136277011219	0.0119111499912814	-0.535658	NS
Fcgr2b	1.22222	10.5796	4.65421637353175	0.000695562889087344	0.0119203443962496	-0.537764	Up
Rps21	0.825962499999999	13.6859	4.65349909069561	0.000696375666780262	0.0119203443962496	-0.538961	NS
Wdr91	1.0748	7.02644	4.65348880288952	0.000696387331509039	0.0119203443962496	-0.538978	Up
Acnat2	-1.2808	8.86824	-4.65212	0.000697945222684248	0.01193721078568	-0.54127	Down
Tmem129	-0.86938	8.77087	-4.64852	0.000702042135893088	0.0119974397469139	-0.547271	NS
Prdx6	1.07257	10.439	4.64591222739412	0.000705034019564965	0.0120387012890335	-0.551631	Up
Insig2	-1.55615	9.39906	-4.64334	0.000707996858901122	0.0120699221704397	-0.555931	Down
Iyd	-0.64703	10.7888	-4.64294	0.000708455268975069	0.0120699221704397	-0.556595	NS
Oga	1.05716	14.1801	4.64281668426969	0.000708599200758701	0.0120699221704397	-0.556803	Up
Col18a1	0.894669750000002	9.12624	4.64135768264245	0.000710286123050168	0.0120887799016106	-0.559241	NS
Slc35f6	0.998192249999999	10.6815	4.63644654370083	0.000715995567137737	0.0121683735887691	-0.56745	NS
Ephb2	0.987194750000001	7.4343	4.63633140334709	0.000716130001123303	0.0121683735887691	-0.567642	NS
Ffar2	-0.810522	7.00851	-4.6334	0.00071956089996411	0.012216714334977	-0.572542	NS
Inpp5j	-0.92994	10.9471	-4.63011	0.000723430754450039	0.0122654070903875	-0.578041	NS
Gnpnat1	-0.858342	12.3646	-4.62996	0.000723605483293039	0.0122654070903875	-0.578289	NS
Chmp5	-0.730142	11.8653	-4.62619	0.000728069808363168	0.012331053967964	-0.584594	NS
Rplp2	0.669857499999999	13.5526	4.62525022197771	0.000729193029127038	0.0123383272391041	-0.586175	NS
Ttc39b	0.976854999999999	12.8327	4.62450403621965	0.000730081624841641	0.0123383272391041	-0.587423	NS
Zfp935	-0.666598	10.1116	-4.62434	0.000730274632502971	0.0123383272391041	-0.587694	NS
Rpl10	0.802050000000001	15.8659	4.62098160876635	0.000734291707951108	0.0123916325274817	-0.593318	NS
Ednrb	1.07957	12.6856	4.62070921406444	0.000734618341597554	0.0123916325274817	-0.593774	Up
Arhgef3	-0.713365	12.5045	-4.61848	0.000737292544243416	0.0124266873524098	-0.597499	NS
Arg2	0.976944999999999	11.4188	4.61736462992614	0.000738641371216925	0.0124386754518183	-0.599372	NS
Kctd10	1.28755	9.47743	4.61690418316464	0.000739197030303747	0.0124386754518183	-0.600143	Up
Fzd5	-0.723963	12.4073	-4.61042	0.00074706701196832	0.0125568701268161	-0.610999	NS
Stat2	-1.13544	11.2898	-4.61013	0.000747425575681271	0.0125568701268161	-0.611491	Down
Irs2	1.26579	12.0244	4.60683199196945	0.000751462553571342	0.0126062235635645	-0.617013	Up
Kbtbd4	-0.963366	8.11195	-4.60652	0.000751848554811566	0.0126062235635645	-0.617539	NS
Zfp93	-0.831699	8.51642	-4.60611	0.000752351477565303	0.0126062235635645	-0.618225	NS
Meox2	-1.02828	4.31478	-4.60576	0.000752781828223791	0.0126062235635645	-0.618811	Down
Baz1b	-0.848405	11.9834	-4.60428	0.000754600866172416	0.0126265437069251	-0.621285	NS
Nmd3	0.702859249999999	9.74313	4.60231982058704	0.000757026512254374	0.012646990104298	-0.624574	NS
Zfp1	0.771189	7.80336	4.60150420957181	0.000758036854479457	0.012646990104298	-0.625941	NS
Lrrc19	-0.95245	13.0301	-4.60148	0.000758065141726885	0.012646990104298	-0.625979	NS
Zbtb21	0.85708	7.25741	4.60133293407393	0.000758249202857328	0.012646990104298	-0.626228	NS
Med10	1.04342	10.2363	4.59662078449764	0.000764115941915673	0.012722572313481	-0.634128	Up
Rpl24	0.691912500000001	14.0477	4.59586082630313	0.000765066566533524	0.012722572313481	-0.635402	NS
Rfx7	-0.797875	11.5749	-4.59582	0.000765115648661514	0.012722572313481	-0.635468	NS
Ppme1	0.833479499999999	9.71134	4.59559520423953	0.000765399123757199	0.012722572313481	-0.635848	NS
Peak1	0.81069	9.56893	4.59524975562981	0.000765831850612435	0.012722572313481	-0.636427	NS
Pwwp2a	-0.692447	10.3393	-4.59363	0.000767867966722444	0.012737799701674	-0.639149	NS
Mavs	-1.13799	11.7339	-4.59355	0.000767970369082653	0.012737799701674	-0.639285	Down
Spindoc	0.910804	8.48748	4.59213666550827	0.000769743086773782	0.0127472397285306	-0.641648	NS
Grb7	-1.05144	10.5679	-4.59212	0.000769762330002396	0.0127472397285306	-0.641674	Down
Emilin2	0.853918499999999	4.96943	4.59084900426898	0.000771367015550922	0.0127636753231914	-0.643808	NS
Crebzf	-0.671322	10.7309	-4.58898	0.000773729176333741	0.0127894022723789	-0.646942	NS
Siah1b	0.769624250000001	7.71896	4.58771789661367	0.000775330838437464	0.0127894022723789	-0.649061	NS
Marchf7	0.703174999999998	13.3773	4.58770373766572	0.000775348811480116	0.0127894022723789	-0.649085	NS
Tob1	-0.986997	9.35096	-4.58768	0.000775375532269508	0.0127894022723789	-0.64912	NS
Cytl1	1.17802	5.98106	4.58690201930692	0.000776367208871249	0.0127956363144322	-0.65043	Up
Adgrl2	0.727758750000003	8.52199	4.58416103636168	0.000779859623027862	0.0128393938594342	-0.65503	NS
Mphosph9	-0.708407	7.41402	-4.58385	0.000780253826078141	0.0128393938594342	-0.655548	NS
Zfp458	-0.831604	7.65403	-4.58192	0.000782723149647934	0.0128698698320266	-0.658786	NS
Mybl1	-1.46906	6.73102	-4.58082	0.000784144076138669	0.0128830731626597	-0.660645	Down
Scarb2	1.04977	12.2544	4.57959703942521	0.000785711499921345	0.01289866067863	-0.662692	Up
Oxnad1	-0.78897	13.0168	-4.57743	0.000788506607466356	0.0129340211989112	-0.666331	NS
Atad2	-0.922164	10.4835	-4.57671	0.000789435302827716	0.0129340211989112	-0.667537	NS
Ttc9c	-0.935322	11.276	-4.57649	0.000789726556967432	0.0129340211989112	-0.667915	NS
Slitrk3	-0.811064	3.89892	-4.57573	0.000790707232000381	0.012939917645193	-0.669187	NS
Lrrc75b	-0.625889	4.8393	-4.5683	0.00080040139322685	0.0130882891352052	-0.681674	NS
Kansl2	-0.659478	9.8914	-4.56442	0.000805503801210876	0.0131614018428257	-0.688185	NS
Als2cl	1.41572	7.11794	4.56330733907401	0.000806976863026258	0.0131751453541382	-0.690058	Up
Odc1	0.90279	12.3092	4.56265483859799	0.000807841161434333	0.0131789361304729	-0.691154	NS
Slc7a5	1.27109	9.91728	4.56136217986428	0.000809556282321852	0.0131965902502958	-0.693328	Up
Casp14	-0.743743	5.4128	-4.55783	0.000814258278081812	0.0132628678435373	-0.699262	NS
Npc1l1	-1.10028	14.977	-4.55201	0.000822080783840798	0.0133798300252122	-0.709058	Down
Pid1	-0.777603	8.40411	-4.54751	0.000828174994446653	0.0134685026982982	-0.716625	NS
Tent4b	-0.716038	13.2874	-4.54644	0.00082963841515105	0.0134817859060672	-0.718434	NS
Bend7	-1.21375	12.5528	-4.54405	0.000832904364554418	0.0135243170534229	-0.722459	Down
H1f0	0.816845000000001	13.2983	4.54328875367589	0.000833941078167899	0.0135306128706012	-0.723733	NS
Cfap69	0.755291500000001	4.74418	4.53540423337149	0.000844819446632477	0.0136964546211824	-0.737011	NS
Dgkb	-1.11798	10.1182	-4.53422	0.000846471703232122	0.0137125785086919	-0.739012	Down
Cp	0.938469500000002	10.6681	4.53063694485591	0.000851469123247651	0.0137828258933154	-0.745042	NS
Dnah8	-0.802614	8.92809	-4.53002	0.000852337892702969	0.013786185201679	-0.746087	NS
Kctd3	1.28877	9.90475	4.52920214238683	0.000853481205662584	0.0137915598937096	-0.74746	Up
Tnfrsf19	-0.752135	6.73776	-4.52884	0.000853993180621567	0.0137915598937096	-0.748074	NS
Pim1	1.52113	12.94	4.52232847551428	0.000863189903930987	0.0139292928073198	-0.759047	Up
Slc7a11	1.71486	8.75861	4.51990433538198	0.000866641471366934	0.0139741748155678	-0.763134	Up
Vmn2r29	-0.985212	7.60165	-4.51825	0.000869010053813855	0.0140015383400039	-0.76593	NS
Trip6	0.773756749999999	5.58739	4.51772573615503	0.000869755791254337	0.014002732426148	-0.766808	NS
Ppp1r15a	0.798571	3.61125	4.51651525287536	0.000871491258784575	0.0140198466469133	-0.76885	NS
Dhrs7	0.764693249999999	9.4192	4.5159234328008	0.000872341072694163	0.0140226977830382	-0.769849	NS
Zswim5	-0.926993	9.02329	-4.51481	0.000873935347798616	0.0140375023622907	-0.771719	NS
Msl2	-0.721158	10.6839	-4.51126	0.000879060895938644	0.0141089612158774	-0.777708	NS
Runx1t1	-1.08155	6.74653	-4.50944	0.000881711990380235	0.0141406256057212	-0.780792	Down
Rasa1	-0.743375	11.376	-4.5067	0.000885699018044666	0.0141936501362131	-0.785413	NS
Mier1	-0.645737	11.6129	-4.50331	0.000890654837518418	0.0142615909165453	-0.791128	NS
Lpin2	-0.66253	13.1715	-4.50238	0.000892033006835735	0.0142615909165453	-0.792711	NS
Tmem88	0.699479500000001	8.34326	4.50215526985475	0.000892358687690155	0.0142615909165453	-0.793085	NS
Tbc1d8b	-0.750198	10.5905	-4.50194	0.000892674763590175	0.0142615909165453	-0.793448	NS
Parvb	0.810188250000002	5.98703	4.50024956019075	0.000895167161665739	0.0142904595356577	-0.796303	NS
Med15	0.613289999999997	13.2692	4.49755775375623	0.000899149932300317	0.0143373086308407	-0.800849	NS
Car14	0.979426749999998	7.13452	4.49705326518029	0.000899898435446915	0.0143373086308407	-0.801702	NS
H3f3b	0.818082499999997	15.9213	4.49655816675041	0.000900633642270374	0.0143373086308407	-0.802538	NS
Mpp7	1.14825	9.93054	4.49641084960937	0.000900852525608009	0.0143373086308407	-0.802787	Up
Apol9b	-1.12501	5.90999	-4.49474	0.000903343654573681	0.0143562463677129	-0.805615	Down
Zfp708	-0.852203	9.99604	-4.49469	0.000903419599714104	0.0143562463677129	-0.805701	NS
Cyp4a14	0.798894	4.14329	4.49368796594867	0.000904908243642548	0.0143689504734985	-0.807387	NS
Pstpip2	-1.51165	12.5945	-4.49295	0.00090601422641032	0.0143755636274191	-0.808638	Down
Slc38a9	-1.11899	11.737	-4.48364	0.000920048158156632	0.0145871361592453	-0.824378	Down
Zfp976	-1.06387	7.86858	-4.48157	0.000923194310352046	0.0146258952709193	-0.827873	Down
Itprid2	0.777004999999997	12.697	4.48099638590503	0.000924066616890853	0.0146285990095348	-0.82884	NS
Stat3	0.852810000000002	13.1124	4.47688842759145	0.000930358498473467	0.0147170290854881	-0.835788	NS
Gm13547	1.35983	11.3958	4.47545551074819	0.000932563758483246	0.0147407291892473	-0.838212	Up
Pgs1	1.11417	8.29815	4.47259835762382	0.000936977301541999	0.0147992725453403	-0.843047	Up
Mfsd2a	2.02934	8.9132	4.4701938591067	0.000940708590755344	0.0148469594312325	-0.847116	Up
Tmem128	0.681219999999998	10.6851	4.4688	0.00094287209884227	0.0148698490081411	-0.849468	NS
Pola1	-0.847579	8.13979	-4.46829	0.000943681595289172	0.0148713662737596	-0.850346	NS
Krit1	-0.70283	9.95811	-4.46714	0.000945474811761092	0.0148783041007454	-0.85229	NS
Pigh	-0.980569	6.46626	-4.46709	0.000945549087893311	0.0148783041007454	-0.85237	NS
Zfp287	-0.720186	7.7578	-4.46647	0.000946516768672647	0.0148822987255324	-0.853418	NS
Ms4a10	1.52708	10.5252	4.46534326146532	0.000948283235916316	0.0148988373667063	-0.855326	Up
Camta2	-1.53754	11.139	-4.46332	0.000951457374752834	0.0149374509082996	-0.858748	Down
Clasp2	0.859740749999998	9.25512	4.46284838757732	0.000952204092728943	0.0149379256051962	-0.859551	NS
Pdgfc	-1.49026	10.3491	-4.45779	0.000960211213185406	0.0150393324982204	-0.868123	Down
Trim6	1.39974	7.47556	4.45725205087619	0.000961061070654003	0.0150393324982204	-0.869029	Up
Rasgrp1	-1.07784	8.90237	-4.45702	0.00096142988295355	0.0150393324982204	-0.869422	Down
Gbp2	1.10638	11.2796	4.45694245607823	0.000961553562287294	0.0150393324982204	-0.869553	Up
Kctd6	0.716495	9.13198	4.45607462050286	0.00096293549332716	0.0150486566845054	-0.871024	NS
H2-Q4	0.784635000000002	11.9126	4.45566198588944	0.000963593298182874	0.0150486566845054	-0.871723	NS
Lrrc1	-1.22342	12.876	-4.45457	0.000965339162946001	0.015064637880435	-0.873576	Down
Orai1	0.611162	9.88024	4.45336906435277	0.00096725717211927	0.0150832795673258	-0.875608	NS
Gmip	-0.729921	9.74059	-4.45136	0.000970478537916346	0.0151222025687727	-0.879011	NS
Zbtb18	-0.862478	10.9906	-4.45089	0.000971240394013595	0.0151227714524193	-0.879815	NS
Map2k5	-0.611805	10.9531	-4.44831	0.000975397826409146	0.0151720577934668	-0.884187	NS
Sgk2	-1.06777	8.21466	-4.44802	0.000975861168451193	0.0151720577934668	-0.884673	Down
Smad3	0.868964999999998	11.3758	4.44396126098411	0.000982443572567598	0.0152630149362607	-0.891554	NS
Mgp	0.761802499999998	10.9643	4.4429582345158	0.000984077375988307	0.0152770135606703	-0.893255	NS
Tmem170	-1.05376	12.1503	-4.4421	0.000985479499484777	0.0152873973844926	-0.894712	Down
Ltb4r1	-0.741531	5.09056	-4.44124	0.000986875461556467	0.0152976702587292	-0.896161	NS
Ubtd1	0.891238	8.45951	4.44067732591823	0.000987803301014648	0.0153006768371875	-0.897123	NS
Gnal	0.910957	5.89672	4.43687783666478	0.000994042741209401	0.0153858924361357	-0.903568	NS
Rpl13	0.956209999999997	11.4369	4.43333931405538	0.000999890789026091	0.0154649280863538	-0.909571	NS
Vcf1	0.726087750000001	8.60906	4.43150732337124	0.00100293264322015	0.015500476411043	-0.91268	NS
Prkg2	-0.773135	9.17735	-4.43018	0.00100514463793464	0.0155231559676291	-0.914935	NS
Anks4b	-1.02685	11.4759	-4.42742	0.00100975522078143	0.0155828176151532	-0.919619	Down
Senp8	-1.38904	8.47689	-4.42691	0.00101060248834202	0.0155843574552092	-0.920477	Down
Sh3tc1	0.70502	6.5958	4.42466156567285	0.00101438552131706	0.0156311335801473	-0.924301	NS
Srsf10	-0.659642	11.7914	-4.42313	0.00101696872081324	0.0156593654802328	-0.926904	NS
Hnf4g	-0.940885	15.223	-4.42211	0.00101869077907028	0.015674305574049	-0.928635	NS
Sh3yl1	-0.601361	9.35037	-4.42049	0.00102142838410134	0.015704838038443	-0.931382	NS
Poli	-1.02028	7.81871	-4.41901	0.00102394124212983	0.0157318724813299	-0.933896	Down
Pkd2l2	-0.814541	5.21437	-4.41803	0.00102561096794321	0.0157442927212717	-0.935563	NS
Ptgr1	1.21651	9.38194	4.41750830085688	0.00102649941201244	0.0157442927212717	-0.936449	Up
Hp	2.726	7.03889	4.41720574492663	0.00102701511347928	0.0157442927212717	-0.936963	Up
Ptprj	-0.647133	13.9182	-4.41176	0.00103634336302772	0.0158736094056418	-0.946216	NS
Map4k4	0.717357499999997	11.6706	4.41139442051553	0.00103697328459323	0.0158736094056418	-0.946838	NS
Acrbp	-1.72045	9.5659	-4.41075	0.00103808560665156	0.0158789778525886	-0.947935	Down
Clock	-0.697647	14.574	-4.40946	0.00104030716060552	0.0158840677663419	-0.950122	NS
Get4	0.613513250000002	9.25284	4.40928857800646	0.00104060674550885	0.0158840677663419	-0.950417	NS
Klrb1b	1.60577	8.52825	4.40923234948414	0.00104070394593616	0.0158840677663419	-0.950512	Up
Abi3bp	-1.22524	11.2446	-4.40721	0.00104420321018307	0.0159258176511388	-0.953947	Down
Rdh12	0.977735750000001	8.17503	4.40474042744889	0.00104849980546138	0.0159702704633212	-0.958148	NS
Eif4a3	0.901050000000003	11.9723	4.40454876230117	0.00104883380386691	0.0159702704633212	-0.958474	NS
Sectm1b	-1.04755	14.6432	-4.40421	0.00104941582496762	0.0159702704633212	-0.959042	Down
Kntc1	-0.726578	8.18131	-4.40224	0.00105287054642721	0.0160111582950115	-0.962405	NS
Trim31	-0.661582	13.0568	-4.39898	0.00105858299690256	0.0160779598573286	-0.967941	NS
Actg1	0.692195000000002	16.0467	4.39885568346341	0.00105880564459265	0.0160779598573286	-0.968156	NS
Parp12	-1.15887	13.0244	-4.39635	0.00106323273782484	0.0161322171270349	-0.972425	Down
Isg20l2	0.908502	7.74376	4.39595403522385	0.00106392625783841	0.0161322171270349	-0.973092	NS
C920006O11Rik	0.741449250000001	5.69271	4.39478834540363	0.0010659906792041	0.0161517730165163	-0.975075	NS
Arl6ip6	-0.904745	10.1295	-4.39227	0.00107046737653803	0.0162078244977788	-0.979363	NS
Ice2	-0.879896	7.68904	-4.39064	0.00107337262017745	0.0162389163567627	-0.982135	NS
Gmeb2	0.888148249999997	8.91923	4.39024409103081	0.00107407864434629	0.0162389163567627	-0.982808	NS
Zscan26	-0.72121	9.44493	-4.38874	0.00107677829178277	0.016267935221289	-0.985376	NS
Mpv17	-0.710468	12.3656	-4.38103	0.00109067010734628	0.0164658805706464	-0.99849	NS
Slc17a5	-0.8018	12.4703	-4.37941	0.00109362890211423	0.0164986027352964	-1.00126	NS
Pxylp1	-0.69649	5.28312	-4.37787	0.00109643166379147	0.0165289253495215	-1.00388	NS
Gipc1	0.814160249999997	9.45743	4.3763916356016	0.00109913256134627	0.0165464669676898	-1.0064	NS
Arrdc3	1.42693	10.7608	4.3758741860163	0.00110008020976171	0.0165464669676898	-1.00728	Up
Clec7a	1.18153	9.00908	4.3756595055965	0.00110047362294579	0.0165464669676898	-1.00764	Up
Gsdme	-1.37626	11.6028	-4.3755	0.00110076980594685	0.0165464669676898	-1.00792	Down
Trim16	0.943112500000002	12.2433	4.3750373040412	0.00110161467263442	0.0165472365344057	-1.0087	NS
Macc1	1.42036	5.73195	4.37366611024988	0.00110413366831866	0.0165637182774875	-1.01104	Up
Acot9	0.651844	10.4335	4.37357522269842	0.00110430084923534	0.0165637182774875	-1.01119	NS
Rbp1	0.909597	8.6224	4.37025833302955	0.00111042019334293	0.0166399589004436	-1.01685	NS
Slc30a9	-0.717773	10.3581	-4.36975	0.001111354126502	0.0166399589004436	-1.01771	NS
Nrep	-0.963102	6.52458	-4.36952	0.00111177815474689	0.0166399589004436	-1.0181	NS
Slc35a5	-1.16087	11.2328	-4.36862	0.0011134641732997	0.0166523729752567	-1.01965	Down
Taf1d	0.584484999999999	12.9463	4.36821640063971	0.00111420501225397	0.0166523729752567	-1.02033	NS
Gprc5b	0.648650000000001	6.53543	4.36719475023943	0.00111610375759659	0.0166688017493777	-1.02207	NS
Rps18	0.699937499999999	15.0607	4.3663099109593	0.0011177509762331	0.0166814531878911	-1.02358	NS
Nr3c1	-0.763525	10.0653	-4.36479	0.00112057888427826	0.0167034173853265	-1.02616	NS
Pygo1	-0.617164	5.914	-4.36466	0.00112082502384151	0.0167034173853265	-1.02639	NS
Clic1	0.696424999999998	13.4204	4.36336030640566	0.00112326037584537	0.0167277539828572	-1.02861	NS
Cry2	1.8526	10.8085	4.36198882002697	0.00112583177440104	0.0167540804171929	-1.03094	Up
Dcaf17	-0.663081	10.5137	-4.36003	0.0011295229807709	0.016794489849704	-1.03429	NS
Qsox1	1.09841	12.8484	4.35968862914697	0.00113015824543789	0.016794489849704	-1.03487	Up
Iars1	-0.696358	11.04	-4.35859	0.00113223849682691	0.0168134191028093	-1.03675	NS
Fbxw8	0.845544250000003	10.7599	4.35735837203955	0.00113455902150866	0.0168358868608071	-1.03884	NS
Card14	0.650119500000002	7.88783	4.35541934941381	0.00113823461100089	0.0168784163618474	-1.04215	NS
Ccdc86	0.639702249999999	7.94921	4.35412307163122	0.00114069877131124	0.0169029343873974	-1.04436	NS
Atf2	-0.57483	13.4794	-4.34786	0.00115268415703781	0.0170684034020464	-1.05505	NS
Zfp788	-0.820308	9.09308	-4.34733	0.00115369910216416	0.0170713077225128	-1.05595	NS
Pde1c	0.754397499999998	7.11746	4.34424994959952	0.00115965130998249	0.017147212880727	-1.06121	NS
Cenpt	0.693105999999998	8.15652	4.34272854303886	0.00116260099832932	0.0171675700724373	-1.06381	NS
Plekhm2	0.685668750000001	9.35095	4.34228037762073	0.00116347139361435	0.0171675700724373	-1.06457	NS
Ifnar2	0.626382500000002	11.6448	4.34226651790076	0.00116349832185495	0.0171675700724373	-1.0646	NS
Hdhd2	-0.651792	11.2453	-4.33931	0.00116925613131082	0.0172337496078858	-1.06965	NS
Brd3	-0.97084	8.919	-4.33912	0.00116963670656427	0.0172337496078858	-1.06998	NS
Dus4l	-0.747561	7.9629	-4.33766	0.00117248426500054	0.0172635059611556	-1.07246	NS
2010106E10Rik	-0.70166	15.4789	-4.33679	0.0011741846604107	0.0172763415560357	-1.07395	NS
Odr4	-0.651493	9.25736	-4.33553	0.00117665958264989	0.017300546994829	-1.0761	NS
Zfp780b	-0.685556	10.1138	-4.33508	0.00117753970761577	0.0173012863735597	-1.07686	NS
Prdm9	-1.05532	8.07361	-4.33453	0.00117862602941185	0.0173050521740899	-1.07781	Down
Mob4	-0.565695	12.9497	-4.3329	0.00118184616308035	0.0173401200943435	-1.0806	NS
Pof1b	-1.12757	12.7978	-4.33244	0.00118276109282772	0.0173413403828166	-1.08139	Down
Tomm20	0.901754999999998	12.1149	4.33142284267663	0.00118476786134471	0.0173585559670948	-1.08312	NS
Fhip1b	0.605521249999999	9.68115	4.33056783451238	0.00118646214954894	0.0173588868656487	-1.08458	NS
Ston2	0.813966000000001	7.36732	4.33016093555084	0.00118726935266281	0.0173588868656487	-1.08528	NS
Tubg2	-0.643964	7.23836	-4.33015	0.00118728824741787	0.0173588868656487	-1.08529	NS
Fam78a	-1.12684	7.58201	-4.3281	0.00119137306840336	0.0174064030155162	-1.0888	Down
Uba6	-0.652862	11.2425	-4.32726	0.00119304396747563	0.0174186090181368	-1.09024	NS
Naip1	-0.693315	14.6152	-4.32642	0.00119472573968823	0.0174309565757592	-1.09168	NS
Gcnt4	-0.918615	12.8059	-4.32321	0.00120114196568372	0.017512313875902	-1.09715	NS
Cdin1	-0.606167	8.272	-4.32122	0.00120515455069633	0.0175585375454002	-1.10056	NS
Tirap	1.00226	9.03263	4.31860970179643	0.00121042594638127	0.017623024131357	-1.10502	Up
Lemd3	0.702636500000001	9.97928	4.31691545046842	0.00121386192132658	0.017660716816286	-1.10792	NS
Zfp141	-0.663487	11.397	-4.31596	0.00121579944434634	0.0176765708613507	-1.10955	NS
Eml2	0.782212499999998	5.41423	4.31459590579595	0.00121858255919838	0.0177046883461513	-1.11189	NS
Ell	1.13062	10.0241	4.31286753749565	0.00122211254452395	0.0177209665520401	-1.11485	Up
Chodl	-0.857336	6.06492	-4.31281	0.00122222404138399	0.0177209665520401	-1.11494	NS
Chn2	-1.01972	10.9828	-4.31252	0.00122282781959227	0.0177209665520401	-1.11544	Down
Cd180	-2.58835	7.48314	-4.31238	0.00122310282835559	0.0177209665520401	-1.11567	Down
Rangap1	0.762396000000001	8.82578	4.30778058535248	0.00123256424148826	0.0178331329651662	-1.12355	NS
Zfp760	-0.619432	7.24478	-4.30763	0.00123286960449679	0.0178331329651662	-1.1238	NS
Ifit1bl2	-2.34449	12.5541	-4.30737	0.00123341060654082	0.0178331329651662	-1.12425	Down
Uaca	-0.78424	12.3827	-4.30618	0.00123588126952907	0.0178564716482408	-1.1263	NS
Il1rap	0.891368	8.0977	4.30502694857628	0.00123826085111355	0.0178784629396581	-1.12826	NS
Ncor1	-0.64938	13.2319	-4.30372	0.00124097543768686	0.0179036543458412	-1.1305	NS
Myadm	0.878472499999997	11.7468	4.30335984375864	0.0012417230650912	0.0179036543458412	-1.13112	NS
Rhpn2	0.737432500000002	12.653	4.29748142925331	0.00125401226307509	0.018068349462925	-1.14118	NS
Ifit3	-1.14487	9.72517	-4.29646	0.00125616912416009	0.0180869268436558	-1.14294	Down
Arhgap39	-0.632898	10.6651	-4.2947	0.00125988070207539	0.018127848693975	-1.14595	NS
Mtm1	-0.91779	10.8043	-4.29114	0.0012674115491766	0.0182147635812697	-1.15204	NS
Ifih1	-0.959465	13.7152	-4.29102	0.00126766856714578	0.0182147635812697	-1.15225	NS
Hspa2	1.31402	10.0713	4.29033	0.00126912583185199	0.0182231435731971	-1.15343	Up
Havcr1	-1.29473	4.94175	-4.28963	0.00127063045356767	0.0182321915529473	-1.15464	Down
Pip4p2	-0.610434	9.53907	-4.28718	0.00127585086059617	0.0182945079728814	-1.15883	NS
Crem	1.85939	10.0429	4.28602195475075	0.00127833608374733	0.0183175457113732	-1.16081	Up
Clk1	0.687512500000002	12.2757	4.28205061191441	0.00128688031658998	0.0184273129949069	-1.16762	NS
Meis1	-1.19099	9.59425	-4.28032	0.00129061230215146	0.0184680685570047	-1.17058	Down
Caap1	-0.59049	8.03344	-4.27862	0.00129429936864041	0.0185081258825678	-1.1735	NS
Eif1ad4	0.774303499999998	8.88854	4.27757628434278	0.00129657827909772	0.0185280058539467	-1.17529	NS
Glcci1	-0.789214	10.2005	-4.27343	0.00130564429379026	0.0186447793707076	-1.18241	NS
Fzd6	0.618511499999997	8.34201	4.27172557279478	0.00130937491754666	0.0186852550690831	-1.18533	NS
Mtus1	-0.647297	11.432	-4.2705	0.00131207629229888	0.0187048862640779	-1.18743	NS
Sox4	-0.653774	6.88862	-4.27029	0.00131254489924437	0.0187048862640779	-1.1878	NS
Zfp939	-1.06406	7.9296	-4.2673	0.00131914830502471	0.0187861495979919	-1.19293	Down
Gaa	0.561730000000003	11.7499	4.26605009499425	0.00132191447479048	0.0188126927542025	-1.19507	NS
Apbb1ip	-0.834742	8.14253	-4.26453	0.00132530090386613	0.0188305467645291	-1.19768	NS
P2ry4	-1.16511	9.91251	-4.26447	0.00132543495764998	0.0188305467645291	-1.19778	Down
Igfbp5	-0.722561	9.98651	-4.26427	0.00132587858651871	0.0188305467645291	-1.19812	NS
Psmd5	-0.740443	9.67056	-4.263	0.00132869435046319	0.01884366072509	-1.20029	NS
Tnc	1.1902	12.8826	4.26299473483302	0.00132871698489059	0.01884366072509	-1.20031	Up
Gucy1b1	-1.01548	9.65961	-4.26264	0.00132951340239855	0.01884366072509	-1.20092	Down
Mill2	-0.805998	4.26047	-4.26215	0.00133061243039975	0.018846425653128	-1.20177	NS
Clec4n	0.823124249999999	7.73896	4.2615750974565	0.00133189013083786	0.0188499291034759	-1.20275	NS
Exog	-0.775177	7.8622	-4.26123	0.00133266801757991	0.0188499291034759	-1.20334	NS
Gnl3	0.679732500000002	10.9181	4.26076717994737	0.00133369950750239	0.0188517295131643	-1.20413	NS
Bcl11a	-1.01742	8.02208	-4.25943	0.00133669151340388	0.0188812204356081	-1.20642	Down
Hells	-0.694937	10.8756	-4.25802	0.00133986629762724	0.0189132514822142	-1.20885	NS
Slc1a5	0.819779999999998	11.9573	4.25708487690276	0.00134197882676845	0.0189192888410032	-1.21045	NS
Leng9	-0.926245	7.83453	-4.25679	0.00134264172959544	0.0189192888410032	-1.21096	NS
Tmem106b	-0.573047	11.5024	-4.25663	0.00134301633098396	0.0189192888410032	-1.21124	NS
Rabggta	0.642321	8.94967	4.25548518897015	0.00134559229602573	0.018930697992332	-1.2132	NS
Lrp8	1.44331	6.04953	4.25546312367615	0.00134564220944103	0.018930697992332	-1.21324	Up
Cd9	0.766680000000001	13.7919	4.2548047594355	0.00134713237110768	0.0189346716854386	-1.21437	NS
Bcorl1	-0.695363	9.44658	-4.25454	0.00134774103224091	0.0189346716854386	-1.21483	NS
Nfkb2	1.14121	8.49639	4.25322979055183	0.00135070420473619	0.0189635232084478	-1.21708	Up
Ccn2	0.863620750000001	7.2159	4.25250428032657	0.00135235289970627	0.0189738934091359	-1.21832	NS
Polq	-0.711286	7.1634	-4.25088	0.00135605343110307	0.0190130181473221	-1.22111	NS
Chp2	-1.0977	12.7215	-4.24682	0.00136535118778209	0.0191305153992398	-1.22809	Down
Fgd2	-0.738032	5.2452	-4.24502	0.00136947854268942	0.0191754587888057	-1.23117	NS
Srsf7	-0.672648	9.98049	-4.24423	0.0013712979621344	0.0191880477936511	-1.23253	NS
Pld1	-0.634953	13.2235	-4.24126	0.00137816856580857	0.0192712517964741	-1.23764	NS
Apbb3	0.889625000000001	8.32489	4.24022141224867	0.00138058668320277	0.0192921258432269	-1.23943	NS
Fam114a2	-0.742192	9.36944	-4.23941	0.00138247076879187	0.0192925645911791	-1.24082	NS
Zfp551	-0.608349	4.06546	-4.23899	0.00138344359849451	0.0192925645911791	-1.24154	NS
H1f1	-0.69996	10.5549	-4.2383	0.00138506510734748	0.0192925645911791	-1.24273	NS
Gvin3	-1.43341	7.3884	-4.23814	0.00138543350346474	0.0192925645911791	-1.243	Down
Chmp1b2	-0.583135	10.9277	-4.23807	0.00138560184766105	0.0192925645911791	-1.24313	NS
Ctdp1	0.826402750000001	6.27081	4.23782346340594	0.00138617016440051	0.0192925645911791	-1.24355	NS
Mfsd8	-0.891928	10.4569	-4.23691	0.00138829604599704	0.0193092623502283	-1.24511	NS
Ezh1	-0.59819	12.5759	-4.23645	0.00138936946714813	0.0193113093470475	-1.2459	NS
Mdm1	-0.634567	6.51636	-4.23559	0.00139138666613312	0.0193264627596332	-1.24738	NS
Wnt11	0.609555	4.70218	4.23486903840848	0.00139308181966562	0.0193371257378219	-1.24863	NS
Adrb2	1.15371	8.98363	4.23399983941964	0.00139512209169568	0.0193525618694367	-1.25012	Up
Fam43a	0.838827000000001	6.47819	4.23078077207877	0.00140270543897041	0.0194448176177487	-1.25566	NS
Phf11	-1.00482	6.32199	-4.22885	0.00140727944927806	0.0194952619521584	-1.25898	Down
Msh6	-0.628877	8.65539	-4.22766	0.00141010623009593	0.0195214507246149	-1.26103	NS
Six5	-0.979624	5.78205	-4.22694	0.00141180093536663	0.0195319427348765	-1.26226	NS
Eif3i	0.659433	9.6866	4.22616764908991	0.00141364798694286	0.0195445271086019	-1.26359	NS
Rab19	-1.45305	8.6589	-4.22532	0.00141566129893827	0.0195535611597097	-1.26505	Down
Zfp846	-0.650353	7.90313	-4.22511	0.00141617714764073	0.0195535611597097	-1.26542	NS
Rack1	0.658267499999999	14.4591	4.22300635170532	0.00142119818977779	0.0196099014286414	-1.26903	NS
Clec12a	-1.00069	6.0808	-4.222	0.00142361652144258	0.019630278343622	-1.27077	Down
Cul4a	-0.658337	11.0621	-4.2212	0.00142552945922971	0.0196436640419566	-1.27214	NS
Ptger2	0.993286999999998	7.18521	4.21705642091681	0.00143552299549164	0.0197683084101752	-1.27927	NS
Rps28	0.657367499999999	13.2389	4.21497412993429	0.00144057178077184	0.019821149098111	-1.28286	NS
4931406C07Rik	-0.7626	14.6017	-4.21462	0.00144142335216373	0.019821149098111	-1.28346	NS
Orc6	0.537989	9.30126	4.21429918485082	0.00144221224911671	0.019821149098111	-1.28402	NS
Atg4c	-0.718812	9.16986	-4.21377	0.0014435094855046	0.0198259086055899	-1.28494	NS
Rps9	0.765274999999999	13.2371	4.21222662971229	0.00144726184064136	0.0198306627754835	-1.28759	NS
Rlim	0.766114999999997	12.9437	4.21222239600764	0.0014472721745492	0.0198306627754835	-1.28759	NS
Cmpk2	-1.41794	10.0285	-4.21194	0.00144797128620965	0.0198306627754835	-1.28809	Down
Lrrc55	-0.835163	6.02046	-4.21158	0.00144883093975246	0.0198306627754835	-1.28869	NS
Pdzk1	-1.11016	9.973	-4.21155	0.00144892580212826	0.0198306627754835	-1.28876	Down
Hps5	-0.776724	10.5651	-4.21128	0.0014495625722978	0.0198306627754835	-1.28921	NS
Bmal2	0.760781749999998	6.18383	4.21071145911547	0.00145096509440527	0.0198368336086922	-1.2902	NS
Zfp738	-0.698583	8.76567	-4.20953	0.00145385092121184	0.01986326202906	-1.29223	NS
Ppp4c	0.674575000000001	10.9326	4.20847721633989	0.00145644390554664	0.0198743707824281	-1.29404	NS
Cbx1	-0.689777	10.0557	-4.20843	0.00145657050964316	0.0198743707824281	-1.29413	NS
Herc6	-1.53561	11.1958	-4.20793	0.00145778084050636	0.0198778762221826	-1.29498	Down
Zfp217	1.34405	10.6638	4.2070105590559	0.00146005218290165	0.0198958352688343	-1.29657	Up
Trim65	-1.03126	8.0444	-4.20611	0.00146228382573642	0.0199132302304237	-1.29813	Down
Mid1ip1	0.955812250000003	8.07987	4.20181621811956	0.00147290656260014	0.0200447969475525	-1.30552	NS
Reps1	0.999895000000002	11.5725	4.20106354987412	0.00147477895979353	0.0200571862574921	-1.30682	NS
Nos3	0.739329	4.71836	4.20008590241677	0.00147721474366525	0.0200772165519406	-1.3085	NS
Slc34a2	-2.08811	14.6191	-4.19921	0.00147940808313558	0.020093927768921	-1.31002	Down
Mtmr7	-0.658453	10.6779	-4.19713	0.00148460980538316	0.0201389174800745	-1.3136	NS
Pold3	-0.62144	10.9034	-4.19711	0.00148465231746724	0.0201389174800745	-1.31363	NS
Lif	1.13395	8.54708	4.19599470461428	0.00148745350747328	0.020163795954038	-1.31555	Up
Kazn	0.651530750000001	8.69232	4.19433839945237	0.00149161967060971	0.0202071335364144	-1.31841	NS
Map2k6	-0.600161	8.73854	-4.19249	0.00149627681091786	0.0202570618381991	-1.32159	NS
H2bc6	-0.7425	4.6098	-4.19106	0.00149991038312036	0.0202930769485246	-1.32406	NS
Atp2c2	0.831898749999999	7.56933	4.18954790913145	0.00150373805655053	0.0203316697412594	-1.32667	NS
Mex3b	-1.01766	5.43893	-4.18784	0.00150807166244261	0.0203770486651108	-1.3296	Down
Zfp457	-0.701104	7.18129	-4.18608	0.0015125729330674	0.0204246328248201	-1.33264	NS
Rbm22	0.73771	11.944	4.18547225260454	0.00151412903736422	0.0204302202004622	-1.33369	NS
Sox9	1.33834	11.9071	4.18515284254813	0.00151494654083719	0.0204302202004622	-1.33424	Up
Irak4	-0.735627	11.6613	-4.18394	0.00151805458587166	0.0204356177027505	-1.33634	NS
Mctp1	1.58299	7.73347	4.18391441054364	0.00151812056235663	0.0204356177027505	-1.33638	Up
Smco4	-0.656392	7.16944	-4.18385	0.00151828729538877	0.0204356177027505	-1.33649	NS
Parp3	0.844344	10.7045	4.17774714145549	0.0015340305254338	0.0206341951127543	-1.34702	NS
Gpr39	0.941387	7.2631	4.17720817649056	0.00153542915808241	0.0206396921449775	-1.34795	NS
Kcnj2	0.722591	5.074	4.17668257585239	0.001536794391372	0.0206447334186306	-1.34886	NS
Acy1	0.891832500000001	12.0162	4.17478289287284	0.00154173933718143	0.0206921388912378	-1.35214	NS
Rgs3	-0.635212	11.1475	-4.17456	0.00154230820840249	0.0206921388912378	-1.35251	NS
Rfesd	-0.556367	6.86388	-4.16811	0.00155925428657827	0.0209036685763843	-1.36366	NS
Lgr5	-0.806458	9.40458	-4.16779	0.00156008001845911	0.0209036685763843	-1.3642	NS
Srek1ip1	-1.02221	11.6565	-4.16741	0.00156109190521891	0.0209037926344952	-1.36486	Down
Hoxb9	-2.35749	5.82338	-4.16629	0.00156406327103156	0.0209301380858389	-1.36681	Down
Eci2	0.90404	11.8998	4.16496	0.00156757328794755	0.0209636532908393	-1.36909	NS
Zfp983	-0.712539	8.27621	-4.16444	0.00156896254322515	0.0209687820921161	-1.37	NS
Ikbkb	0.794875749999997	9.53993	4.16360384441446	0.00157117706867829	0.0209849267808288	-1.37144	NS
Ankhd1	-0.612598	11.0536	-4.15996	0.0015808897944105	0.0211011340100284	-1.37772	NS
Pigw	-0.714063	8.33105	-4.15859	0.00158456051767223	0.0211310957011718	-1.38009	NS
Ube2g2	0.851039499999999	9.06369	4.1583142940906	0.0015853098043301	0.0211310957011718	-1.38057	NS
Exo1	-0.742586	7.56183	-4.15799	0.00158617510539277	0.0211310957011718	-1.38113	NS
Phkb	-0.66541	12.0926	-4.15701	0.00158882611112814	0.0211394267552914	-1.38283	NS
Zfp967	-0.851635	14.2781	-4.15701	0.00158882832392641	0.0211394267552914	-1.38283	NS
B4galt6	0.981470000000002	13.4681	4.15573216474886	0.00159225689560949	0.0211715331738279	-1.38503	NS
Fasl	0.753429250000002	4.87734	4.1550909327403	0.00159398701540293	0.0211810294991305	-1.38614	NS
Pcgf5	-0.589218	9.86331	-4.15367	0.00159782887326462	0.0212185568017159	-1.3886	NS
Ifit1bl1	-2.32829	13.0632	-4.15241	0.00160123566017311	0.0212502624309034	-1.39077	Down
Cimap1b	-0.783525	6.7373	-4.15074	0.00160577405996804	0.0212969359899959	-1.39366	NS
Armc6	-0.652778	5.64842	-4.1503	0.00160698350440833	0.0212994272621801	-1.39443	NS
Sde2	1.15162	9.42886	4.14954302931393	0.00160903803096197	0.0213131092169798	-1.39573	Up
Pithd1	0.583436	9.34939	4.14866322229498	0.00161143845895294	0.0213313526544189	-1.39725	NS
Kdm1b	-1.05937	9.76049	-4.14755	0.00161449155336677	0.0213550511905652	-1.39918	Down
Ifitm5	0.676709	4.83511	4.14725905576381	0.00161527726641668	0.0213550511905652	-1.39968	NS
Pttg1ip2	0.761512499999998	4.91313	4.14674962420133	0.0016166723421031	0.0213599503552012	-1.40056	NS
Ccdc68	-0.786095	10.8264	-4.14507	0.00162129327404539	0.0214074372834531	-1.40347	NS
Ifi211	1.35787	9.5255	4.14435005426151	0.00162326046966753	0.0214198465393028	-1.40471	Up
Cyp2d22	-0.710158	8.62921	-4.1431	0.00162670801910646	0.0214463826232525	-1.40687	NS
Kcnn4	0.911313249999997	10.2635	4.14287334212337	0.00162732875965205	0.0214463826232525	-1.40726	NS
Edn2	-0.870491	7.51101	-4.1414	0.00163139306907771	0.0214863639274802	-1.4098	NS
Srxn1	0.697374999999999	13.9054	4.14092443284272	0.00163271421736312	0.021490188584472	-1.41063	NS
Impdh2	0.832965000000003	11.7885	4.13883652549485	0.00163850439438706	0.021552793765663	-1.41424	NS
Prok2	0.737899	4.31771	4.13806798161879	0.00164064110474231	0.0215672928075489	-1.41557	NS
Slc30a10	-1.30714	10.8201	-4.13654	0.0016448960290025	0.0216096013287165	-1.41821	Down
Rab25	0.665153	12.8668	4.13483943283283	0.001649648921275	0.0216564779460494	-1.42115	NS
Pot1a	-0.961624	7.77412	-4.13452	0.00165054167855881	0.0216564779460494	-1.42171	NS
Gigyf2	-0.773488	10.1283	-4.13082	0.00166094755948972	0.0217793054514473	-1.42812	NS
Btrc	-0.74598	9.24408	-4.12897	0.00166616933593719	0.021834044302297	-1.43132	NS
Pip5k1a	0.647606250000003	9.60603	4.12767810012723	0.00166981391927172	0.0218680592983016	-1.43355	NS
Katnip	-0.680785	9.86133	-4.1266	0.00167286507306905	0.0218864968721319	-1.43541	NS
Slc25a33	0.876292250000001	5.70644	4.12644170500065	0.00167332131105464	0.0218864968721319	-1.43569	NS
Srr	-0.663207	9.5678	-4.12517	0.00167694180096963	0.0219201000679723	-1.43789	NS
Zbtb3	-0.653708	6.08097	-4.12474	0.00167817174750256	0.0219224328093238	-1.43864	NS
Zc4h2	-0.673727	5.62128	-4.12136	0.00168782347683903	0.0220347098738991	-1.44449	NS
Zfp810	-0.628486	8.88415	-4.1209	0.0016891348353359	0.022038030151388	-1.44528	NS
Gsta5	1.07224	8.39443	4.11990242440483	0.00169200001040821	0.0220616061394626	-1.44701	Up
H1f2	0.927922499999999	10.8342	4.11722453340602	0.00169971169590367	0.0221483057174348	-1.45164	NS
Yeats2	-0.672229	10.0133	-4.11596	0.00170336339383888	0.0221721115277714	-1.45383	NS
Dkk2	-0.803804	6.05374	-4.11586	0.00170366553155978	0.0221721115277714	-1.45401	NS
Prkce	-0.966156	10.6484	-4.11466	0.00170713149633768	0.022203056672414	-1.45608	NS
Srgn	0.869067500000002	14.4641	4.11430079976946	0.0017081731930813	0.022203056672414	-1.45671	NS
Osr1	-2.67045	8.02285	-4.11248	0.00171346541288463	0.0222407695928384	-1.45986	Down
Msmp	0.571615	4.8487	4.11210961300613	0.00171454341722808	0.0222407695928384	-1.4605	NS
Mtap	-0.68756	10.5419	-4.1119	0.00171514674409263	0.0222407695928384	-1.46086	NS
Akt1	0.750582500000002	12.603	4.11183564973627	0.00171534162335288	0.0222407695928384	-1.46098	NS
Usp27x	0.612137	5.79864	4.11110378581589	0.00171747584619948	0.0222546015645823	-1.46224	NS
Stox2	0.867090749999999	8.27337	4.1092661152526	0.00172284696973456	0.0223076573295474	-1.46543	NS
Ufl1	-0.633097	11.3315	-4.10897	0.00172371029583677	0.0223076573295474	-1.46594	NS
Ccser2	-0.845154	10.405	-4.10642	0.00173121305765793	0.0223908567240138	-1.47037	NS
Ecm1	1.16461	10.5189	4.10588042872293	0.00173278849648266	0.02239733872484	-1.47129	Up
Vgf	0.666080250000001	5.34879	4.10506919204196	0.00173517942836221	0.0224143469032984	-1.4727	NS
Sdc1	0.781217500000004	12.4357	4.10415731843749	0.00173787106818311	0.022435216037492	-1.47428	NS
Gipc2	-0.580732	13.1787	-4.10302	0.00174124739852854	0.0224542098482066	-1.47626	NS
Ppp1r18	0.858087250000001	7.76087	4.10293146983496	0.00174149634632597	0.0224542098482066	-1.4764	NS
Tmod4	-0.793856	5.75294	-4.10201	0.00174423802622257	0.0224747418680961	-1.47801	NS
Gal	1.3646	6.14358	4.10166679168107	0.00174524471602703	0.0224747418680961	-1.4786	Up
Usp22	0.676254999999999	12.955	4.10082966251652	0.00174773049929871	0.0224928599875796	-1.48005	NS
Hexd	-0.975434	7.84571	-4.10043	0.00174893013435466	0.022494413554078	-1.48075	NS
Fam83h	1.17589	12.4184	4.09934228888359	0.00175215623119916	0.0225220131099083	-1.48263	Up
Pacs2	-0.672325	8.52209	-4.09897	0.00175327268891943	0.0225224783063963	-1.48327	NS
Pla2g7	1.33968	10.5114	4.09838349818357	0.00175501533394726	0.022530981956568	-1.48429	Up
Man2a2	0.717023	9.04329	4.0977936724573	0.00175677660171393	0.0225323254131374	-1.48531	NS
Txnip	0.805872	15.7827	4.09762471617007	0.00175728145818799	0.0225323254131374	-1.4856	NS
Cyp1b1	0.809928000000003	7.76597	4.09585286591809	0.00176258501777272	0.0225864382517169	-1.48867	NS
Zfp759	-0.955437	7.31075	-4.0953	0.00176423816395992	0.0225937355530715	-1.48963	NS
Abcg8	-0.93243	13.0205	-4.09442	0.0017668757787988	0.0226136237643807	-1.49115	NS
Irf1	-0.64054	13.6221	-4.08958	0.001781492203778	0.0227867061083236	-1.49955	NS
Tmem181b-ps	1.10184	14.9014	4.08804937594298	0.00178614186317926	0.0228112280442434	-1.50221	Up
Pank2	-0.625635	13.5251	-4.08796	0.00178642819506008	0.0228112280442434	-1.50237	NS
Rfc1	-0.55854	11.4714	-4.08777	0.00178698206540885	0.0228112280442434	-1.50269	NS
Pde11a	-0.694583	8.00583	-4.08704	0.00178921220833765	0.0228112280442434	-1.50396	NS
Cyth1	0.684359999999996	11.3098	4.0868354030952	0.00178983592658873	0.0228112280442434	-1.50431	NS
Timm21	-0.612841	9.51039	-4.08679	0.00178997405536871	0.0228112280442434	-1.50439	NS
Slc38a4	0.926478499999998	5.44023	4.08593342811187	0.0017925857468922	0.0228305560396796	-1.50588	NS
Cdkn3	0.562523249999998	9.78971	4.08265827869028	0.00180260763476304	0.022939311084097	-1.51156	NS
Sp100	-1.1714	12.7996	-4.08242	0.00180332538092163	0.022939311084097	-1.51197	Down
Gpr141b	-0.85326	6.86162	-4.08196	0.00180473825921761	0.0229432853453829	-1.51276	NS
Apol11a	-0.850024	5.51283	-4.07968	0.0018117871261258	0.0230188603245563	-1.51674	NS
Slc20a2	0.749451500000001	9.88284	4.07746542461959	0.00181861743204832	0.0230915681125307	-1.52057	NS
Hic2	0.572057	6.49327	4.07199845782477	0.00183563241562677	0.0232934268006101	-1.53006	NS
Slc5a4b	1.54518	7.58883	4.07005743507103	0.00184171331380278	0.0233563752308236	-1.53343	Up
Gbp4	-0.759803	11.6684	-4.06841	0.00184688820265588	0.0234077642171261	-1.53629	NS
Phospho2	-0.603293	9.77058	-4.0665	0.00185291542968249	0.023469886873299	-1.53961	NS
Bysl	0.544141	8.61617	4.06603210130616	0.00185439095134278	0.0234743150847272	-1.54042	NS
Rora	0.834379999999999	7.77475391666667	4.06409788213841	0.00186051498692532	0.0235375467004891	-1.54378	NS
Igfbp3	1.05741	9.29797	4.06225627939392	0.0018663653526797	0.0235897951873388	-1.54698	Up
Sntg2	-1.02118	7.24705	-4.06209	0.00186690786412341	0.0235897951873388	-1.54728	Down
Zfp438	-0.615008	7.48102	-4.0608	0.00187101860385857	0.0236274178509069	-1.54952	NS
Fbxl12os	-1.1401	5.60262	-4.06021	0.00187289152001581	0.0236367526033957	-1.55054	Down
Creb1	-0.762084	10.0212	-4.05944	0.00187534075686515	0.023650753720797	-1.55187	NS
Taco1	-0.607072	9.83789	-4.05915	0.0018762696845987	0.023650753720797	-1.55237	NS
Xiap	-0.603977	13.1448	-4.05763	0.00188116175579697	0.0236840285123131	-1.55503	NS
Pop4	0.621409999999999	11.3792	4.05751279695998	0.00188152270870757	0.0236840285123131	-1.55522	NS
Brpf1	0.603073999999999	9.76519	4.05726520088722	0.00188231738907875	0.0236840285123131	-1.55565	NS
Rgn	0.843606249999999	5.48933	4.05662355590317	0.00188437842876999	0.0236956609538151	-1.55677	NS
Rcor3	-1.09451	9.55564	-4.05519	0.00188898237784484	0.0237291221840058	-1.55925	Down
Nfatc3	-0.65139	13.1291	-4.05509	0.00188931569022254	0.0237291221840058	-1.55943	NS
Acbd5	-0.643558	11.8767	-4.05304	0.00189593159691483	0.0237978795087762	-1.56299	NS
Eif6	0.939640000000001	14.0041	4.05255833295516	0.00189749110862909	0.0237984034223232	-1.56383	NS
Ccdc32	-0.676554	8.54242	-4.05232	0.00189825626607144	0.0237984034223232	-1.56424	NS
Lix1l	0.876035250000003	8.30592	4.04998993259262	0.00190582459979989	0.0238789285343918	-1.5683	NS
Tmem126b	-0.663693	9.47404	-4.0483	0.00191134097008113	0.0239336623935265	-1.57124	NS
Ric1	0.576992499999999	11.4282	4.04766157442325	0.00191341216263107	0.0239397073462211	-1.57234	NS
Ppbp	0.690859	3.90424	4.04744479140788	0.00191412020462135	0.0239397073462211	-1.57272	NS
Ugt2a3	1.39331	9.04117	4.04686679089082	0.0019160093637242	0.0239489683598836	-1.57372	Up
Hid1	0.691360750000001	10.6233	4.04494554404447	0.00192230279674856	0.0240031769823104	-1.57707	NS
Tmem220	-0.679047	8.73634	-4.04484	0.00192264883497809	0.0240031769823104	-1.57725	NS
Cep162	-0.710105	9.03652	-4.04071	0.00193626488735693	0.0241586993635575	-1.58444	NS
Ehd4	0.989955000000002	11.8456	4.03925651916647	0.00194106481468382	0.0241858337792181	-1.58696	NS
Kcnrg	0.623566	4.7507	4.03917811471633	0.00194132471428534	0.0241858337792181	-1.5871	NS
Klhl13	-0.669654	6.52804	-4.03886	0.00194239125460455	0.0241858337792181	-1.58765	NS
Aspa	-0.856053	15.4353	-4.03861	0.00194322356136474	0.0241858337792181	-1.58809	NS
Pkp2	0.999256000000001	8.75234	4.03829943592926	0.00194423988747516	0.0241858337792181	-1.58862	NS
Hirip3	-0.708495	7.51383	-4.0379	0.00194557386322207	0.0241879961087161	-1.58932	NS
Fcer1g	1.04878	10.5923	4.03483756102445	0.00195576966910805	0.0243002633082442	-1.59465	Up
Szt2	-0.583392	8.42297	-4.03016	0.00197147595074714	0.0244808231668416	-1.60279	NS
Rps13	0.728829999999999	12.2059	4.02918546703029	0.00197474710419932	0.0245035840663676	-1.60448	NS
Ankrd26	-0.663485	8.30367	-4.02892	0.00197565949520667	0.0245035840663676	-1.60495	NS
Cftr	-0.80954	13.9686	-4.02855	0.00197687717445568	0.0245041095185651	-1.60558	NS
Rcl1	0.678059999999999	10.837	4.02811819126193	0.0019783520322574	0.024507820273639	-1.60634	NS
Atp7b	0.76742	5.83375	4.02731903008872	0.00198105583374137	0.0245267417325855	-1.60773	NS
Coq10b	0.892647499999999	10.9158	4.02523906843204	0.00198811100345501	0.0245969118869603	-1.61135	NS
Foxa3	-0.564473	7.14215	-4.02495	0.00198908309470071	0.0245969118869603	-1.61185	NS
Max	-0.897922	13.5616	-4.02426	0.00199144653956219	0.024611540547322	-1.61306	NS
Rfx1	-0.90568	8.93074	-4.02353	0.00199392131154457	0.0246275269101852	-1.61432	NS
Gm12216	-0.681314	6.69136	-4.02315	0.00199522546982323	0.0246290442986054	-1.61499	NS
Chrm2	-0.80926	8.11298	-4.01995	0.00200615331003147	0.0247492842371871	-1.62055	NS
Pdcd4	0.712002500000001	15.0249	4.0194684405355	0.00200782197518605	0.0247552219755494	-1.62139	NS
2310033P09Rik	-0.5747	11.1939	-4.01847	0.00201123713810036	0.0247657340571483	-1.62312	NS
Rnps1	0.663582	11.2843	4.01826512630175	0.00201195773461104	0.0247657340571483	-1.62349	NS
Mmp11	-0.895365	5.17611	-4.01818	0.00201223816455509	0.0247657340571483	-1.62363	NS
Hdac5	0.719351	7.70917	4.01712395474149	0.00201588809715585	0.0247902414633865	-1.62548	NS
Fyco1	-0.695111	8.79723	-4.01692	0.00201660748822022	0.0247902414633865	-1.62584	NS
Vcpip1	-0.855688	11.9337	-4.0162	0.00201906641523113	0.0248058430708036	-1.62708	NS
Styx-ps	-0.542015	11.3847	-4.01445	0.00202511705506328	0.0248655273739778	-1.63013	NS
Zfp966	-0.754204	14.2187	-4.01132	0.00203601456101069	0.0249711548507021	-1.63559	NS
Mms22l	-0.876314	9.11888	-4.01129	0.00203611507727918	0.0249711548507021	-1.63564	NS
Tnfsf4	0.551881750000001	5.67901	4.01051825483555	0.00203879652487586	0.024989340827241	-1.63698	NS
Gsta13	1.20567	11.2753	4.00920873052351	0.00204336999044746	0.0250306820980253	-1.63926	Up
Eif1	0.572960000000002	16.0467	4.00726631436359	0.00205017346444133	0.0250862478055537	-1.64265	NS
Klrb1f	-0.755835	5.34878	-4.00723	0.00205031254547765	0.0250862478055537	-1.64272	NS
Furin	0.552812500000002	10.5436	4.00581353539248	0.00205527733700705	0.0251322446916481	-1.64518	NS
Rbms1	0.832587500000002	13.7316	4.00424288539743	0.00206081017658216	0.025185129760587	-1.64791	NS
Rps12	0.578762	15.6124	4.00339009477925	0.00206382073831061	0.0252071462056461	-1.6494	NS
Kif18b	0.923124999999999	8.33877	4.00077893932874	0.00207306722986972	0.0253052568358043	-1.65395	NS
Zfp961	-0.770772	9.93736	-4.00023	0.0020750341569728	0.0253144453708169	-1.65492	NS
Bmf	0.760897749999999	6.50353	3.99833362787617	0.00208176549882014	0.0253668758500864	-1.65821	NS
B4galnt3	-0.741995	8.03152	-3.99803	0.00208283408630334	0.0253668758500864	-1.65874	NS
Mgme1	-0.801645	5.83146	-3.99799	0.00208298198740217	0.0253668758500864	-1.65881	NS
Nts	-1.16307	10.4934	-3.99761	0.00208433390537797	0.0253685216539552	-1.65947	Down
Ezh2	-0.773543	11.2563	-3.99442	0.00209577707603458	0.0254929149698045	-1.66504	NS
Tsc22d2	1.21324	13.2005	3.99387737144175	0.00209771465217282	0.0255016051213709	-1.66598	Up
Cdc45	-0.93006	8.17032	-3.99182	0.00210511650326902	0.0255766748115709	-1.66957	NS
Zc3h12a	1.39671	11.9397	3.98581712697635	0.00212688610140237	0.02581141693023	-1.68004	Up
Timm23	0.530827500000003	13.3288	3.98580968012319	0.00212691324697276	0.02581141693023	-1.68005	NS
Amotl1	0.81445	7.2496	3.98532996998011	0.00212866266470647	0.0258176194860181	-1.68089	NS
Oxsm	-0.76138	9.37573	-3.98348	0.00213540850235409	0.0258843789916165	-1.68411	NS
Atxn1	-0.625465	11.6636	-3.98108	0.00214423476827316	0.0259762641974009	-1.6883	NS
Zfp39	-0.715694	9.00355	-3.97999	0.00214824503520986	0.0260097332979619	-1.69021	NS
Abhd2	1.0741	14.1266	3.97938459149692	0.00215046894368641	0.026021547885617	-1.69126	Up
Bcl2a1b	1.1031	8.81033	3.97697522496826	0.00215937192635765	0.0261042876968299	-1.69546	Up
Nob1	0.592467499999996	10.6272	3.97661171810377	0.00216071846201736	0.0261042876968299	-1.6961	NS
Ap5b1	-0.970978	7.29319	-3.97652	0.0021610629078003	0.0261042876968299	-1.69626	NS
Zbtb8os	-0.584684	9.79183	-3.97489	0.00216709075708037	0.0261549012149419	-1.69909	NS
Tbl3	0.754883749999999	7.26181	3.97471410107771	0.00216776196937117	0.0261549012149419	-1.69941	NS
Hoxb4	-0.931043	7.48759	-3.97161	0.00217933542960839	0.0262793316205351	-1.70483	NS
Rnf4	0.667010000000003	12.9219	3.97040841339612	0.00218383228647774	0.0263183348790603	-1.70692	NS
Rcc1l	0.624482749999997	10.6061	3.96676017595375	0.00219754562865373	0.0264683008733689	-1.71329	NS
Tac1	1.35819	12.3215	3.96604700621694	0.00220023679597783	0.0264854139488117	-1.71454	Up
Pds5a	-0.565908	12.9686	-3.96385	0.00220854098008888	0.0265700351378379	-1.71837	NS
Prr15	-1.04606	14.6877	-3.96186	0.00221609351019462	0.0266455211038338	-1.72184	Down
Cdc42se1	0.972083999999999	10.6814	3.96102733106745	0.00221927580494786	0.0266684041829153	-1.7233	NS
Rad9b	-0.725033	5.57929	-3.95974	0.00222417469266873	0.0267118768245682	-1.72555	NS
Zfp78	-0.923173	4.93206	-3.95874	0.00222800223974011	0.02674244023969	-1.7273	NS
Slc27a1	1.15511	8.7833	3.95781352505149	0.00223155516118498	0.0267696740825924	-1.72892	Up
Sugct	-0.797739	6.809	-3.95472	0.0022434514777915	0.0268932161009128	-1.73432	NS
Csk	-0.82579	10.9622	-3.95446	0.00224443359468503	0.0268932161009128	-1.73477	NS
Camk2n1	-0.635887	9.88888	-3.95383	0.00224688094456781	0.0269070768600197	-1.73588	NS
Izumo1	0.551042250000001	4.84711	3.95270641677724	0.00225121384625783	0.0269298615174992	-1.73784	NS
Rnf216	-0.597234	9.67922	-3.95267	0.00225136690608668	0.0269298615174992	-1.73791	NS
Hoxc8	-1.78375	9.49796	-3.95139	0.00225632241521149	0.0269736617171699	-1.74014	Down
Wdr82	-0.768877	11.9522	-3.95024	0.00226078056861047	0.027011469383931	-1.74215	NS
Mgat4c	-0.689012	16.414	-3.94946	0.00226381948360034	0.0270322866057179	-1.74352	NS
Rap2c	-0.81946	12.7991	-3.94675	0.00227436592383518	0.0271426760996221	-1.74824	NS
Noc4l	0.848254499999999	9.33219	3.94588166710102	0.0022777653633383	0.0271676945424716	-1.74976	NS
Tlr4	0.961386750000001	9.50776	3.94215393058082	0.00229240514415051	0.027326675157458	-1.75628	NS
Ldah	-0.643167	10.6645	-3.94041	0.00229929460757061	0.0273891507351396	-1.75933	NS
Eif2b2	0.803602749999998	8.84494	3.93961929172773	0.00230241509354713	0.0273891507351396	-1.76071	NS
Kbtbd7	-1.0116	7.73701	-3.93956	0.00230266707910422	0.0273891507351396	-1.76082	Down
Tmem248	0.644234999999998	11.0842	3.93949656645287	0.00230290091796728	0.0273891507351396	-1.76092	NS
Hsp90ab1	0.598762499999996	15.6401	3.93800824512845	0.00230880111591185	0.0274436684524779	-1.76353	NS
Faap100	0.672601750000002	8.65554	3.93719328130982	0.00231203854954572	0.02746649100825	-1.76495	NS
Rgmb	-0.665022	9.80566	-3.93685	0.00231339520936386	0.027466957129856	-1.76555	NS
Tab1	-0.580094	7.90404	-3.93601	0.00231673914772643	0.0274910042634879	-1.76702	NS
Zfyve26	-0.976558	9.21926	-3.93526	0.00231973441970391	0.0275108890309481	-1.76833	NS
Smad6	-0.991142	9.16523	-3.934	0.00232477526528432	0.0275549968765849	-1.77054	NS
Ptbp1	0.833762499999999	13.4804	3.93046639358104	0.00233894168576568	0.0276931126745929	-1.77672	NS
Lrrtm2	0.670178500000001	4.53021	3.93043091461178	0.00233908443666162	0.0276931126745929	-1.77678	NS
Pecam1	0.623594	9.81755	3.92970676219465	0.00234200006658535	0.0277118952260147	-1.77804	NS
H2-Q8	0.962049999999996	11.2979	3.92845010598897	0.00234706865475778	0.0277561170635536	-1.78024	NS
Olfml3	0.638020499999998	9.21068	3.92515380134842	0.00236041812178846	0.027898161803383	-1.78601	NS
2700097O09Rik	-0.615239	9.07938	-3.92287	0.00236971275254313	0.0279921479760747	-1.79	NS
Wnt2b	0.809358000000001	9.44587	3.91908429220775	0.00238520512510724	0.0281515472781982	-1.79663	NS
Sat1	0.635097500000004	15.8119	3.91843933367993	0.00238785487326234	0.0281515472781982	-1.79776	NS
Iqcc	-0.729686	6.90558	-3.91844	0.00238785783783039	0.0281515472781982	-1.79776	NS
Oaf	1.07233	8.91955	3.91825616770709	0.00238860794930848	0.0281515472781982	-1.79808	Up
Ephx4	-0.766815	5.80734	-3.91542	0.00240029784422548	0.0282587607864552	-1.80304	NS
Ptp4a3	-1.21682	10.1639	-3.91521	0.00240115996601453	0.0282587607864552	-1.80341	Down
Cep95	-0.729853	7.1075	-3.91506	0.00240177102564145	0.0282587607864552	-1.80366	NS
Mrpl52	0.745841749999999	9.56466	3.9145	0.002404114292778	0.0282703772645958	-1.80466	NS
Rrp1b	0.624141499999999	8.19896	3.91354619322692	0.00240805761705549	0.0282864351155753	-1.80632	NS
Crybg1	-0.639922	12.7125	-3.91314	0.00240973282995924	0.0282864351155753	-1.80703	NS
Ube2j2	0.592615000000002	13.3011	3.91302079261297	0.0024102374046883	0.0282864351155753	-1.80724	NS
Zscan25	0.632989249999998	9.26408	3.9128595530139	0.00241090676772878	0.0282864351155753	-1.80752	NS
Cul7	-0.732235	8.79589	-3.9122	0.00241363890967204	0.0283025633451926	-1.80867	NS
Pold1	-0.648169	6.19227	-3.90943	0.00242519394809956	0.0284220734254793	-1.81353	NS
Scn3b	-1.00797	5.30873	-3.90875	0.00242801410075925	0.0284391381947919	-1.81471	Down
Mier3	-0.64061	11.7767	-3.90775	0.00243221890450514	0.028472393003946	-1.81647	NS
Isx	-1.28234	10.7791	-3.90727	0.0024342173266209	0.0284797963202689	-1.8173	Down
Galm	-0.577055	13.329	-3.90552	0.00244158471206326	0.0285353517209626	-1.82037	NS
Ube2s	0.547622	10.3039	3.9052392104328	0.00244276249840121	0.0285353517209626	-1.82087	NS
Nol10	0.737336	7.85724	3.90502779458994	0.0024436524917425	0.0285353517209626	-1.82124	NS
Gfm2	-0.636598	10.5156	-3.90477	0.00244474700933557	0.0285353517209626	-1.82169	NS
Hoxb7	-0.974632	8.37278	-3.90434	0.00244653101797151	0.0285353517209626	-1.82243	NS
Ggt6	-0.94141	7.97335	-3.90419	0.00244717774843307	0.0285353517209626	-1.8227	NS
Heatr5b	-0.96545	9.28172	-3.90162	0.00245804884121019	0.0286441035170038	-1.82721	NS
Cmtm3	0.728047499999999	10.094	3.90133507845859	0.00245925201666443	0.0286441035170038	-1.8277	NS
Trim56	-0.5846	11.54	-3.90003	0.00246479041011424	0.0286925825016593	-1.82999	NS
Nadsyn1	-1.05558	9.30746	-3.89874	0.00247028314200824	0.0287404761315456	-1.83225	Down
Hrh2	-0.692142	4.71451	-3.89811	0.00247295036414143	0.0287554613173367	-1.83335	NS
Pdgfa	0.675114999999998	11.4695	3.89731099381162	0.00247636904599947	0.0287688007156965	-1.83475	NS
L3mbtl3	-0.658734	9.70133	-3.8972	0.00247685727299512	0.0287688007156965	-1.83495	NS
Rimoc1	-0.558508	12.3251	-3.89633	0.00248054732372905	0.0287956186817522	-1.83646	NS
Slc25a39	0.675427	12.5721	3.89422369989083	0.00248958504354888	0.0288844510700894	-1.84016	NS
Npc2	0.756130750000001	9.65924	3.89257977925861	0.00249665211668755	0.0289364848835868	-1.84304	NS
Ldlr	0.972165000000002	12.9504	3.89253481303252	0.00249684571469004	0.0289364848835868	-1.84312	NS
Chd3	-1.07197	8.14948	-3.88835	0.00251493178805479	0.029129896027308	-1.85045	Down
Mmut	-0.519825	11.258	-3.88786	0.0025170477469653	0.029138216810927	-1.85131	NS
Adamtsl5	-1.15974	10.5484	-3.88743	0.00251892428076283	0.0291437582295362	-1.85206	Down
Trp53bp1	-0.606536	7.70381	-3.88594	0.00252539516643498	0.0291790379077331	-1.85467	NS
Myo1f	-0.642345	7.9568	-3.88582	0.00252592590506545	0.0291790379077331	-1.85488	NS
Tlr2	0.858062499999999	9.31957	3.88545897118107	0.00252750492834834	0.0291790379077331	-1.85552	NS
Tmtc4	-0.690467	11.1225	-3.88544	0.00252757170422399	0.0291790379077331	-1.85555	NS
Zfp809	-0.571345	12.76	-3.87982	0.00255219685429559	0.0294470128473762	-1.8654	NS
Gata6os	-0.825248	9.17255	-3.87933	0.00255435824554218	0.029449409853971	-1.86626	NS
Lox	1.20745	7.54652	3.87913660032406	0.00255522962376294	0.029449409853971	-1.8666	Up
Slc23a3	0.674589750000002	6.27551	3.87829865612368	0.00255892774868614	0.0294757373659432	-1.86807	NS
Gata4	2.26676	8.91322	3.87755369812786	0.00256222015413313	0.02949736498814	-1.86938	Up
Rps25	0.730137499999998	13.509	3.87612	0.00256857728753841	0.0295542317151702	-1.8719	NS
Tmem89	-0.932869	7.67838	-3.87515	0.00257287143832258	0.0295549418435353	-1.87359	NS
Usp21	-0.586215	6.07691	-3.87505	0.00257332504444676	0.0295549418435353	-1.87377	NS
Ankrd1	0.572387999999999	6.87536	3.87489352788725	0.00257401288840499	0.0295549418435353	-1.87404	NS
Mapk4	-1.07259	6.63971	-3.87456	0.00257550557528672	0.0295549418435353	-1.87463	Down
Vmn1r100	-0.636657	5.56673	-3.87419	0.00257714443242109	0.0295549418435353	-1.87528	NS
Vmn1r148	-0.636657	5.56673	-3.87419	0.00257714443242109	0.0295549418435353	-1.87528	NS
Rpl19	0.546462499999999	15.9827	3.87314150486733	0.00258181045840512	0.0295921749572778	-1.87711	NS
Chrnb1	0.736855000000001	6.64328	3.87244266866998	0.00258492753310329	0.0295980239251423	-1.87834	NS
Bcl9	-1.07053	10.3616	-3.87239	0.00258516003490259	0.0295980239251423	-1.87843	Down
Khdc4	0.596331	7.7719	3.87180719202476	0.00258776538672888	0.0296115919582384	-1.87945	NS
P2ry1	-0.764348	9.82273	-3.87087	0.00259195219090613	0.0296432316117399	-1.8811	NS
Smad1	0.822405	12.6071	3.86972590002462	0.00259708246116919	0.0296687997694379	-1.88311	NS
Phf11d	-0.697813	7.10165	-3.86953	0.00259798131331256	0.0296687997694379	-1.88346	NS
Akap17b	-0.619385	7.36138	-3.86942	0.00259845692258591	0.0296687997694379	-1.88364	NS
Nt5c2	0.849936999999997	9.5119	3.86772320878269	0.00260608050178593	0.0297395579538779	-1.88662	NS
Mt4	0.816080999999998	6.04707	3.86642572749868	0.00261192729540348	0.029789973841284	-1.88889	NS
Rpl37	0.590999999999998	14.1555	3.86384957307193	0.00262357645839287	0.0299064765341897	-1.89341	NS
Slco3a1	0.742705000000001	11.0595	3.8609404839029	0.00263679588289176	0.0300407417280931	-1.89852	NS
Msantd3	0.64354	6.57589	3.86045645257662	0.00263900209774638	0.0300494564368729	-1.89937	NS
2410002F23Rik	0.87547	11.7367	3.85982400510214	0.00264188767651034	0.0300658931045655	-1.90048	NS
Prkca	-0.79466	13.2053	-3.85879	0.00264662215842344	0.0301033417244792	-1.9023	NS
Dnajc24	-0.574792	8.24014	-3.85772	0.00265150409406976	0.0301424257673175	-1.90417	NS
Tango2	-0.831064	9.34959	-3.85676	0.00265591521971207	0.0301435048122002	-1.90586	NS
Bcl2a1c	0.683134249999999	7.15122	3.85662860830126	0.0026565169352019	0.0301435048122002	-1.90609	NS
Sod2	0.552185000000001	12.7412	3.85617220742314	0.00265861328388309	0.0301435048122002	-1.90689	NS
Zfp433	-0.729302	9.4421	-3.85591	0.00265984024932302	0.0301435048122002	-1.90735	NS
Tmt1b	-1.11735	9.3419	-3.85566	0.0026609862050077	0.0301435048122002	-1.90779	Down
Rnf39	1.57486	7.97439	3.85562801204607	0.00266111513252901	0.0301435048122002	-1.90784	Up
Ehd1	0.965742500000001	12.6587	3.85538171495518	0.00266224824463634	0.0301435048122002	-1.90827	NS
Map3k4	-0.603434	8.32975	-3.85518	0.00266316542107885	0.0301435048122002	-1.90862	NS
Rps15a	0.529868	13.5732	3.85401727331746	0.00266853454472125	0.0301755848072633	-1.91067	NS
Rdh5	-0.77958	5.67648	-3.85394	0.00266889435390635	0.0301755848072633	-1.91081	NS
Akt2	0.740543249999998	8.83433	3.85295637127355	0.00267343299468278	0.0302105173475021	-1.91253	NS
Tnfaip8	0.815223249999999	7.2615	3.85216217590298	0.00267710609038729	0.0302356364455496	-1.91392	NS
Mmp12	1.11223	5.75923	3.85166452834402	0.00267941033839466	0.0302452767434706	-1.9148	Up
Arid2	-0.525917	11.2079	-3.84962	0.00268890966620953	0.030336080969049	-1.91839	NS
Osm	1.10427	4.95975	3.84862794161329	0.00269351518265426	0.0303642240632235	-1.92013	Up
Esam	0.539587	6.9478	3.84845582246267	0.00269431697045247	0.0303642240632235	-1.92043	NS
Gtf2a1	-0.801477	12.8371	-3.84721	0.00270012048879607	0.0304015437820247	-1.92262	NS
Trim7	-0.869167	6.69059	-3.84712	0.00270054482633746	0.0304015437820247	-1.92278	NS
Neto2	-0.895839	7.57509	-3.8457	0.00270716745007449	0.0304559845162066	-1.92526	NS
Piezo1	0.715445	5.36636	3.84519874899725	0.00270953619316681	0.0304559845162066	-1.92615	NS
Adam17	-0.786565	11.405	-3.84511	0.00270996965142459	0.0304559845162066	-1.92631	NS
Mettl3	-0.681172	8.64634	-3.84484	0.00271122390820085	0.0304559845162066	-1.92678	NS
Ckap5	-0.544843	12.9897	-3.84439	0.00271333119827367	0.0304632429471231	-1.92757	NS
C1qtnf7	-0.629754	5.29292	-3.84375	0.0027163386069116	0.0304805939803552	-1.9287	NS
Zbtb44	-0.64477	10.9362	-3.84315	0.00271913284991178	0.0304815190070726	-1.92974	NS
Gabpb1	0.633298499999999	10.5612	3.84310957451801	0.00271934506945921	0.0304815190070726	-1.92982	NS
Fam3b	-1.30133	12.9625	-3.84269	0.00272132371722083	0.0304873069211914	-1.93056	Down
Uchl1	0.795210249999998	6.98163	3.84056468283724	0.00273134329608647	0.0305802150155191	-1.93429	NS
Ehmt1	-0.638128	11.1521	-3.84031	0.00273255026974493	0.0305802150155191	-1.93474	NS
Tlr9	-0.644696	5.73547	-3.83844	0.00274138290581518	0.0306626031133802	-1.93801	NS
Cdcp1	0.888437499999998	11.9111	3.83784796751057	0.00274421213595145	0.0306777902533254	-1.93906	NS
Fam133b	0.590527	11.3878	3.83721274914524	0.00274723015752939	0.0306950705007129	-1.94018	NS
Mir692-3	0.829845000000001	13.3367	3.83686961735322	0.0027488618600639	0.0306968510554216	-1.94078	NS
Cbfa2t3	-1.22188	7.20303	-3.83635	0.00275131199417068	0.0307077643289424	-1.94168	Down
Septin9	0.520307499999999	12.4377	3.83530254591118	0.00275632656065971	0.0307472725859787	-1.94353	NS
AU041133	-0.638526	6.59095	-3.83426	0.002761308842948	0.0307815473439687	-1.94536	NS
Trub1	-0.66688	6.82356	-3.83404	0.00276235191522689	0.0307815473439687	-1.94575	NS
Mrpl13	0.688564999999999	10.9097	3.83319744140739	0.00276638722400006	0.0308100465989195	-1.94723	NS
Cdc6	-0.872733	7.66417	-3.83183	0.00277294158911659	0.0308665558950837	-1.94963	NS
Dctd	-1.3926	10.6752	-3.83084	0.00277769544115454	0.0308686711307376	-1.95137	Down
Foxp4	0.658164499999998	9.43529	3.83084056622347	0.00277769628060913	0.0308686711307376	-1.95137	NS
Cox4i1	0.625747500000001	13.8084	3.83057169992168	0.00277898942776168	0.0308686711307376	-1.95184	NS
Prkd2	-0.600695	10.8337	-3.8305	0.00277935778546835	0.0308686711307376	-1.95198	NS
Pik3r3	-0.721856	9.22847	-3.83025	0.00278053452844382	0.0308686711307376	-1.95241	NS
Eif4a1	0.761474999999999	14.9191	3.82845836527949	0.0027891755164725	0.0309359180943145	-1.95556	NS
Upf2	-0.557108	11.5436	-3.82838	0.00278955950008687	0.0309359180943145	-1.9557	NS
Mpp2	0.551195	5.54142	3.82686353949536	0.00279688802959566	0.0309884189375597	-1.95836	NS
Sorcs2	0.852858	8.06782	3.82678544276662	0.00279726626890917	0.0309884189375597	-1.9585	NS
Sra1	0.701481000000005	9.23205	3.82641350571804	0.00279906836723814	0.0309919152355539	-1.95915	NS
Or10g6	0.566889000000001	4.10773	3.82386597324213	0.00281144395467821	0.0311124177341221	-1.96363	NS
Mup6	-0.714512	5.24582	-3.82226	0.00281929657695806	0.0311827662244024	-1.96646	NS
Sin3a	-1.00886	12.5047	-3.8211	0.00282496550432989	0.0312289002119692	-1.9685	Down
Ubxn10	-0.710247	5.91247	-3.82007	0.00282996811453293	0.0312563199994241	-1.97029	NS
Adck2	-0.615543	6.25188	-3.81998	0.00283044424955214	0.0312563199994241	-1.97046	NS
Flvcr2	-1.51112	7.86626	-3.8166	0.00284703047232062	0.0314228365894191	-1.97639	Down
Pi15	1.07133	6.45362	3.81546263826147	0.00285266943812418	0.0314684154050005	-1.9784	Up
Pank3	-0.580973	13.8467	-3.81281	0.00286579497326405	0.0315909182234708	-1.98306	NS
Slc2a3	1.32799	5.8628	3.81261018418635	0.00286680499202872	0.0315909182234708	-1.98341	Up
Cdc14a	-0.964111	10.3979	-3.81182	0.00287073837576571	0.0316175511866558	-1.98481	NS
Il1rl1	1.51802	10.9407	3.81123193722136	0.00287366096045351	0.0316208255602977	-1.98584	Up
Epb41l2	0.536135	12.5233	3.81115001825931	0.00287406899308188	0.0316208255602977	-1.98598	NS
Vmn1r132	-0.808888	4.43944	-3.80867	0.0028864621309696	0.0316902968804455	-1.99035	NS
Vmn1r139	-0.808888	4.43944	-3.80867	0.0028864621309696	0.0316902968804455	-1.99035	NS
Trip10	0.705776	9.34976	3.80863202807952	0.00288664022037924	0.0316902968804455	-1.99041	NS
Rps14	0.735612499999998	13.7118	3.80848192160092	0.00288739143172589	0.0316902968804455	-1.99067	NS
Tctn1	-0.529326	8.19305	-3.80836	0.00288798331204597	0.0316902968804455	-1.99088	NS
Tyk2	-0.690975	10.9778	-3.80654	0.00289710619758008	0.0317710650718368	-1.99408	NS
Bag4	-0.635316	7.89345	-3.80629	0.00289839156634052	0.0317710650718368	-1.99453	NS
Tcaim	-0.824271	5.66865	-3.80381	0.0029108907683686	0.0318913093167193	-1.9989	NS
Pcyox1l	-0.612739	5.81077	-3.80348	0.00291255528807764	0.0318927863451316	-1.99948	NS
Sdsl	0.62529	7.87595	3.80202373417046	0.00291990394037844	0.031956470998924	-2.00203	NS
Litaf	0.806900000000001	10.9297	3.80154871956386	0.0029223102189562	0.0319660261044165	-2.00287	NS
Slc44a3	0.605527499999997	11.9889	3.80021536397828	0.00292907556032776	0.0320208487246979	-2.00521	NS
Zfp446	-0.728033	4.66996	-3.79996	0.0029303937535001	0.0320208487246979	-2.00567	NS
Or2l13	-0.563491	4.42845	-3.79945	0.00293298780607659	0.03203240585065	-2.00657	NS
Samd4b	0.626681250000001	8.74051	3.79888431161382	0.00293584538151664	0.0320468274132149	-2.00756	NS
Aoc1	-0.635032	14.8851	-3.79741	0.0029433435640595	0.0321082548035343	-2.01014	NS
Trpv4	0.542603499999998	5.07186	3.79717694181148	0.00294455288907658	0.0321082548035343	-2.01056	NS
Vopp1	0.829125000000001	10.6964	3.79652071276464	0.00294790673229117	0.032120273614396	-2.01172	NS
Mrpl57	0.681240000000001	11.046	3.79623411206817	0.00294937272562954	0.032120273614396	-2.01222	NS
Kat7	0.674187499999995	10.5569	3.79584339609624	0.00295137249500642	0.032120273614396	-2.01291	NS
Ccdc127	-0.519282	11.8264	-3.79561	0.00295257715497454	0.032120273614396	-2.01332	NS
Tbc1d31	-0.701103	9.17434	-3.79546	0.00295335817155726	0.032120273614396	-2.01359	NS
Prkdc	-1.00934	8.29266	-3.79475	0.00295695954575961	0.0321426744366748	-2.01483	Down
Txnrd3	0.9096	6.289	3.79270095616291	0.00296750728939627	0.032236239838516	-2.01844	NS
Mmgt2	-0.767564	8.10638	-3.79233	0.00296939838053436	0.032236239838516	-2.01908	NS
Cplane2	-1.13921	4.56275	-3.79218	0.00297020560841236	0.032236239838516	-2.01936	Down
Herpud1	1.38949	14.5266	3.79053246389862	0.00297869456224986	0.0322986217582486	-2.02225	Up
Srm	-0.568547	10.3364	-3.79012	0.00298084848080901	0.0322986217582486	-2.02299	NS
Kif20b	-1.05959	10.3171	-3.78946	0.00298426433980348	0.0322986217582486	-2.02415	Down
Mbd4	-0.739839	6.29364	-3.78942	0.00298444391634263	0.0322986217582486	-2.02421	NS
Arhgap4	-0.71741	7.01425	-3.78935	0.00298480083942562	0.0322986217582486	-2.02433	NS
Fam107b	1.08608	13.849	3.78926600465953	0.00298524841134563	0.0322986217582486	-2.02448	Up
Ndst2	0.644894	8.25441	3.78856820733923	0.00298886584201498	0.0323195837285888	-2.02571	NS
Snx19	-0.597678	9.23787	-3.78829	0.00299028620137406	0.0323195837285888	-2.02619	NS
Tox4	0.731352	12.0492	3.78768062224922	0.00299347369924768	0.0323372710650854	-2.02727	NS
Gpr137	-0.754239	8.5133	-3.78704	0.00299679276192987	0.0323563605869891	-2.0284	NS
Tsen54	-0.712216	8.08053	-3.78605	0.00300195964952264	0.0323953709797606	-2.03014	NS
Nfasc	-0.640388	6.22589	-3.78474	0.00300877575248052	0.0324521291585444	-2.03244	NS
Tspan4	1.42927	8.5018	3.78393869495766	0.00301298068256043	0.0324806795505183	-2.03386	Up
Vsig10	-0.546641	9.94274	-3.78312	0.00301728605279725	0.0325102826432919	-2.03531	NS
Nmnat1	-0.962183	8.56676	-3.78191	0.00302361159161571	0.0325616105752045	-2.03743	NS
Fam83f	1.05615	9.76036	3.78077	0.00302961149787445	0.032609380546817	-2.03944	Up
Pkp3	0.861934499999998	8.6946	3.78007817061832	0.00303324376403831	0.0326250268001571	-2.04066	NS
Hmgxb4	-0.566583	9.27553	-3.7799	0.00303419477986976	0.0326250268001571	-2.04097	NS
Chek1	-0.624319	9.47863	-3.77807	0.00304386073090357	0.0327120888549529	-2.0442	NS
Zeb1	0.657997499999997	11.6379	3.77635126130569	0.00305293925736448	0.0327814362200137	-2.04722	NS
Ifit3b	-1.10943	9.08923	-3.77625	0.00305345815814987	0.0327814362200137	-2.04739	Down
Ddr2	0.866731	10.3959	3.7752118637912	0.00305898696087266	0.0328238904514843	-2.04923	NS
Rubcn	-0.960331	7.96549	-3.77445	0.00306304983457354	0.0328505792186336	-2.05057	NS
Napepld	-1.64146	9.51	-3.77195	0.00307639152485442	0.0329162478585872	-2.05498	Down
Tmem37	0.806026500000002	5.58382	3.77171	0.00307766672731781	0.0329162478585872	-2.0554	NS
Ago1	-0.542626	8.71143	-3.77166	0.00307790870952448	0.0329162478585872	-2.05548	NS
Clec2h	-0.51374	16.7881	-3.77159	0.00307830987124292	0.0329162478585872	-2.05561	NS
Treh	-0.973139	10.1541	-3.77154	0.00307855299984746	0.0329162478585872	-2.05569	NS
I830077J02Rik	-1.05456	8.48732	-3.77152	0.00307864565802892	0.0329162478585872	-2.05572	Down
Cdc42ep4	0.839938500000001	6.7134	3.7698604759185	0.00308755727590246	0.0329946087366942	-2.05865	NS
Pole4	-0.599795	11.8147	-3.76929	0.00309059282449925	0.0330101279702791	-2.05965	NS
Hspb7	2.08316	10.3096	3.76751083032014	0.00310018874178968	0.0330956656823211	-2.06279	Up
Mospd2	-0.538825	9.9501	-3.76473	0.00311519702092667	0.0332388652452918	-2.06769	NS
Gtf2a2	0.655839500000001	9.73435	3.76200754555873	0.00312998341808449	0.0333795520632448	-2.07249	NS
Slc7a6	0.680565499999999	7.91683	3.76110338060116	0.00313490679137856	0.0334149650784518	-2.07408	NS
Spred2	0.727507	12.5979	3.75943682799784	0.00314400251793193	0.0334947922822498	-2.07702	NS
Trmt1	1.00718	9.87703	3.7587399017179	0.00314781429418546	0.0335182738608135	-2.07824	Up
Arl5a	-0.648117	11.7515	-3.75829	0.00315026266633077	0.0335272211997602	-2.07903	NS
Bid	-0.87522	5.89139	-3.75784	0.00315273769531224	0.0335364429640637	-2.07983	NS
Gata5	-0.687083	11.7059	-3.75717	0.00315641799641886	0.0335552189146938	-2.08101	NS
Lamb1	0.901214	10.2833	3.75636957315361	0.00316081438648561	0.0335552189146938	-2.08242	NS
Ddx3x	0.514842500000002	15.7635	3.75626683242615	0.00316137912234812	0.0335552189146938	-2.0826	NS
C3ar1	0.861822999999998	9.34775	3.75611813445508	0.00316219665650616	0.0335552189146938	-2.08286	NS
Zfp821	0.533878999999999	8.12346	3.75605387664268	0.00316255001042608	0.0335552189146938	-2.08298	NS
Midn	1.04337	13.9141	3.75430966315839	0.00317215705112163	0.0336400317186342	-2.08605	Up
D1Pas1	0.539987250000002	4.7509	3.75396129133424	0.00317407947691916	0.0336433060570857	-2.08666	NS
9930111J21Rik1	-1.11105	11.0916	-3.75242	0.00318258735592032	0.033703120674297	-2.08938	Down
Atoh1	-0.709397	9.79905	-3.75233	0.00318310074529047	0.033703120674297	-2.08954	NS
St6gal1	-1.15861	9.17874	-3.75206	0.00318457229259749	0.033703120674297	-2.09001	Down
Id1	-1.24271	14.1686	-3.75166	0.00318678990226068	0.0337094787784033	-2.09072	Down
Vip	1.0462	10.8209	3.75126995716226	0.00318897175284591	0.0337154523707325	-2.09141	Up
Pdzd8	-0.617712	12.5012	-3.74955	0.00319850026968434	0.0337990532806127	-2.09443	NS
Rars2	-0.55235	8.88702	-3.74925	0.00320019206983495	0.0337997996271473	-2.09497	NS
Phf6	-0.558866	8.76858	-3.74818	0.00320615309820445	0.0338176577092059	-2.09685	NS
Ubl4a	0.671889750000002	9.29845	3.74801729543943	0.00320706651097498	0.0338176577092059	-2.09714	NS
Hoxc5	-0.594881	4.17826	-3.74782	0.00320818425953852	0.0338176577092059	-2.0975	NS
Hyal2	-0.763572	10.0626	-3.74778	0.00320837099855194	0.0338176577092059	-2.09755	NS
Tifab	-0.847774	3.94829	-3.7461	0.00321778338186258	0.0338997300295366	-2.10052	NS
Slc38a6	-0.710475	11.347	-3.74461	0.00322615604383912	0.0339707713929302	-2.10316	NS
Uba7	-0.557034	9.05073	-3.7436	0.00323183251548829	0.0340133650254495	-2.10494	NS
Tepsin	-0.784801	10.6761	-3.74283	0.0032361296341746	0.0340358688514715	-2.10628	NS
Cox6b2	-1.46816	6.15451	-3.74264	0.00323723573948237	0.0340358688514715	-2.10663	Down
Rps20	0.581510000000002	14.1524	3.74207962271145	0.00324037228177077	0.0340516742452816	-2.10761	NS
Ccl4	0.605566	6.24239	3.73967913613229	0.00325393842530695	0.0341670620104897	-2.11184	NS
Gulp1	-0.789228	8.69302	-3.73956	0.00325463020542149	0.0341670620104897	-2.11206	NS
Cdhr2	-0.75534	14.6822	-3.73909	0.00325729277224439	0.0341778042317682	-2.11289	NS
Mthfd1l	0.789574749999998	10.0549	3.73757617249369	0.00326587136287857	0.034215243523602	-2.11555	NS
Ypel2	-1.6365	8.87634	-3.73745	0.00326661443933126	0.034215243523602	-2.11578	Down
Cdc42ep1	0.708150000000002	7.98882	3.73733376003621	0.00326724979751892	0.034215243523602	-2.11598	NS
Iqgap2	-0.750905	15.3918	-3.7373	0.00326742528924608	0.034215243523602	-2.11604	NS
Socs4	-0.592125	11.1602	-3.73601	0.00327478552916804	0.034275102157442	-2.11831	NS
Gm9396	0.516957499999997	13.9873	3.73551503266579	0.00327761085228787	0.0342874604412192	-2.11919	NS
Adam9	0.696547499999998	11.1452	3.73351249280347	0.00328905833383933	0.0343899584765377	-2.12272	NS
Mgat2	-0.696317	13.0204	-3.73107	0.00330306210614574	0.0345068936267036	-2.12702	NS
Rpl32	0.493688	15.233	3.73098734533465	0.00330355219333783	0.0345068936267036	-2.12717	NS
Myo6	-0.629315	13.2646	-3.73055	0.0033060740191394	0.0345159425263082	-2.12795	NS
Grpel1	0.606424999999998	12.4037	3.72867124965892	0.00331690414395457	0.0346116789275819	-2.13126	NS
Rassf9	-0.910339	5.95318	-3.72778	0.00332207324597715	0.0346482766910343	-2.13284	NS
[truncated: 18,850 more rows]

## Sheet: Grouping
	GSM2539097	GSM2539098	GSM2539099	GSM2539100	GSM2539105	GSM2539106	GSM2539107	GSM2539108
0610009L18Rik	9.69194	10.6771	10.5632	10.5566	10.8193	10.4572	10.436	10.7041
0610010K14Rik	7.13821	6.64761	5.9191	5.75886	6.67528	7.01865	6.9762	6.38991
0610030E20Rik	8.62388	9.03043	8.90678	8.82804	8.09864	8.43182	8.44673	8.05027
0610040J01Rik	7.22041	7.93262	8.0817	8.01308	8.03046	8.45902	8.28738	8.32975
1110002E22Rik	5.39479	5.12951	4.93307	5.20704	5.39199	5.40925	6.13616	5.53718
1110002L01Rik	6.56391	6.65717	6.48979	6.59874	5.7608	5.5645	5.84387	5.57221
1110004F10Rik	10.8675	11.1325	11.4156	11.1683	11.6567	11.2621	11.6678	11.4049
1110032F04Rik	3.586	3.86585	3.73574	3.46331	3.83882	3.80507	3.93933	3.94142
1110038F14Rik	5.54302	5.47068	5.32784	5.4674	5.10674	5.48727	5.38767	5.33694
1110059E24Rik	11.2718	10.8559	10.881	10.1948	10.268	10.1046	9.96368	10.0046
1110059G10Rik	9.28901	9.29846	9.21128	8.99179	9.06076	9.37936	9.30955	8.8051
1110065P20Rik	6.30337	6.19787	6.41798	6.04006	6.79073	6.12644	6.21338	6.46293
1190005I06Rik	5.67219	6.05709	5.60923	5.78805	6.34375	6.20478	6.01761	5.97049
1500004A13Rik	5.74131	6.5139	6.41791	6.69251	6.33047	6.45818	6.70747	6.30813
1500009L16Rik	7.58078	8.01341	7.43414	7.38305	8.02115	8.20818	8.52967	8.30669
1500011B03Rik	8.27752	7.96695	7.99289	8.14516	7.90299	8.43531	8.70105	8.30464
1600012H06Rik	10.4666	11.1179	11.22	11.0788	10.6348	11.2216	11.397	11.0661
1600014C10Rik	6.29186	7.55871	7.02219	7.70346	7.30603	6.79582	7.05276	6.92028
1600014C23Rik	5.09818	5.2014	5.11705	5.02982	4.89482	5.2433	5.30811	5.0671
1700001F09Rik	4.14641	3.53444	3.63044	4.019	4.36071	4.05747	4.16594	4.18425
1700001G17Rik	4.10766	4.4452	4.26755	4.37217	4.07647	3.933	4.52051	4.45861
1700001J03Rik	5.87155	6.31559	6.03033	6.36196	6.67509	6.62497	6.18974	6.374
1700001J11Rik	4.39277	4.3239	4.94525	4.24011	5.07782	4.30687	4.66855	5.04448
1700001K19Rik	4.81433	4.78468	4.56243	4.56991	5.13773	4.56768	4.68135	4.64607
1700001O22Rik	7.07209	7.36955	6.93529	7.45253	7.06221	7.44483	7.04311	7.29223
1700003E16Rik	3.47004	3.96427	3.60493	4.10312	4.02032	3.67569	3.83261	3.68212
1700003E24Rik	6.23068	5.30381	5.20043	5.52617	5.24936	5.31021	5.20121	5.29599
1700003F12Rik	5.49917	5.61906	5.6198	5.40699	5.60158	5.44542	5.60017	5.49878
1700006A11Rik	4.75091	4.43321	4.08897	4.03775	4.61013	4.30038	4.03562	4.8765
1700008J07Rik	7.14186	6.45419	6.43206	6.11157	5.81409	6.10466	6.21908	6.00392
1700008O03Rik	3.82477	3.42716	3.38632	3.44223	3.18621	3.68213	3.2807	3.3216
1700008P02Rik	3.99639	4.042	3.94872	3.76463	3.71895	4.2115	3.92988	3.59508
1700009J07Rik	5.38694	5.37145	5.41066	5.17721	5.45848	4.97356	5.1598	5.40595
1700009N14Rik	2.93059	3.10338	2.94695	2.94369	2.94164	2.79638	2.98559	3.0227
1700010B08Rik	4.37654	3.77521	3.82967	4.05327	4.26431	4.18774	4.59503	4.46523
1700010D01Rik	3.80394	3.48586	3.23223	3.35798	3.74031	3.5439	3.77371	3.54858
1700010I14Rik	7.59925	7.02029	7.12102	6.60373	7.22645	7.02654	6.91196	7.13808
1700011L22Rik	4.33224	3.72039	3.68982	4.12161	3.67951	4.2147	4.10242	3.88856
1700012A03Rik	4.50525	3.89896	4.05509	4.20249	4.42215	4.47932	4.63696	4.59761
1700012B07Rik	5.07055	4.84275	4.46626	3.80689	4.86656	4.51893	3.81675	4.40167
1700012B09Rik	7.60398	7.68421	7.07316	7.71853	7.65696	7.52152	7.88038	7.93186
1700013D24Rik	4.928	5.03227	4.57481	4.60876	4.98391	4.23648	5.19841	4.85531
1700013G24Rik	3.39225	3.22502	3.37613	3.95638	3.25985	3.43686	3.34091	3.22669
1700013H16Rik	4.95922	5.86896	5.31741	5.39423	5.57683	5.5766	5.67237	6.31103
1700016H13Rik	3.93459	3.41699	3.91689	3.48856	4.29842	3.74204	3.74988	4.00486
1700017B05Rik	10.1505	9.57734	9.46028	9.42802	9.3554	10.4457	10.6471	9.76958
1700017N19Rik	4.27269	4.03008	4.47717	4.77209	4.53209	4.63828	4.35511	4.40751
1700018B08Rik	4.76783	5.27473	5.47688	5.29065	5.37831	5.11106	5.28702	4.9211
1700018B24Rik	4.00589	4.30251	4.21789	3.55956	4.02161	3.73508	3.73042	4.5321
1700018F24Rik	7.10487	6.28693	6.13705	5.85076	6.43962	6.28479	6.01913	6.52683
1700018L02Rik	3.28881	2.99864	2.99571	3.70801	3.80194	3.56016	3.75492	3.18991
1700019A02Rik	7.23776	7.0546	6.90369	6.65925	7.13338	6.28375	6.16507	6.46351
1700019D03Rik	9.85594	9.99433	10.1578	9.64156	9.94847	9.24272	10.1809	9.48809
1700019M22Rik	5.55019	5.84348	5.46135	4.97463	5.59902	5.006	5.49634	5.12187
1700020A23Rik	5.12397	4.98134	5.06212	4.67542	4.97709	5.24995	4.97855	5.38117
1700020L24Rik	6.299	6.20794	6.17795	5.65466	6.5439	6.17178	5.99763	6.24533
1700020N01Rik	5.77934	5.34186	5.60535	5.56439	5.61544	5.39318	5.52021	5.45086
1700020N15Rik	7.5507	7.45708	6.95587	6.83085	7.82026	7.2377	6.75906	7.50822
1700022A21Rik	4.45339	3.95412	4.1797	4.06093	4.20835	4.07273	3.9916	4.26038
1700024G13Rik	5.34951	4.84415	4.90937	4.44774	5.05816	5.32624	4.64184	5.21318
1700025B11Rik	4.56044	3.85822	4.56689	4.10965	4.35222	4.1892	4.1818	4.20136
1700025C18Rik	4.19397	4.08499	3.92509	3.82169	4.3533	4.01799	3.90929	4.21034
1700025G04Rik	14.1334	13.3173	13.6058	13.2663	13.4203	12.8396	12.9497	13.0739
1700028J19Rik	3.87055	3.51315	3.73481	3.28039	3.54641	3.82686	3.66239	3.65928
1700029F12Rik	4.70388	4.82081	4.68855	4.78139	4.79042	4.99628	4.7438	5.16971
1700029H14Rik	6.11738	6.73285	6.7273	6.57632	6.99221	7.25278	6.91771	7.39451
1700030C10Rik	4.10081	4.11168	4.16676	4.19084	4.49151	3.98513	4.17909	4.4556
1700030J22Rik	7.95975	7.45083	7.63984	7.342	7.59309	7.35125	7.56895	7.3543
1700030K09Rik	4.6675	5.66668	5.69555	5.60872	5.08073	5.12798	5.39069	5.54534
1700031F05Rik	4.27884	3.92837	3.70686	3.83796	4.39731	3.94623	3.91179	4.11954
1700031M16Rik	4.15204	3.88326	4.06983	3.83115	3.82486	3.69711	3.70759	3.98183
1700034E13Rik	5.62755	5.13083	5.20695	5.44326	5.72384	5.51124	5.28803	5.53847
1700034H15Rik	7.04601	6.43996	5.90474	5.74	6.3524	5.69655	6.01647	6.3679
1700034J05Rik	3.64806	3.54782	3.84246	3.43938	4.03558	3.76979	3.98484	4.28418
1700037C18Rik	4.06663	4.06379	4.11638	3.73809	3.99439	3.98565	3.97584	3.76772
1700048O20Rik	5.08091	5.22897	5.23444	5.29704	5.37643	4.72569	5.37475	5.02848
1700049E17Rik2	4.09392	4.03513	3.8011	3.37139	4.92567	4.14253	4.24924	4.49544
1700049L16Rik	8.17619	7.03625	6.82913	7.14245	6.97501	7.80644	7.73475	7.45499
1700052K11Rik	7.69589	7.5363	7.50734	7.20392	7.70256	6.42818	7.268	6.91805
1700056E22Rik	5.89837	5.50853	5.30794	5.20698	5.84662	5.65521	6.30794	5.66341
1700060C20Rik	5.02447	5.21597	4.83479	4.57056	5.10036	5.0911	5.46142	4.89105
1700061I17Rik	3.79511	3.47034	3.51841	3.41842	3.58594	3.39801	3.56689	3.68651
1700065D16Rik	3.31393	3.43233	3.40164	3.51265	3.39152	3.4213	3.47795	3.67586
1700066M21Rik	6.36634	5.92908	5.99582	6.1406	5.53891	5.97825	5.67723	5.66666
1700067K01Rik	4.197	3.73085	3.92657	3.79888	4.14761	3.70701	3.52091	3.85709
1700067P10Rik	5.52395	5.01951	4.95534	4.81297	5.36848	5.46763	5.40012	5.36591
1700069L16Rik	3.6421	3.63965	3.32194	3.97216	3.76372	3.96977	3.98968	3.78036
1700071K01Rik	8.10839	7.72414	8.01414	7.40331	8.211	8.24193	8.25584	7.94555
1700084J12Rik	6.57781	6.41876	6.57018	5.99008	6.61666	6.57879	6.5713	6.89771
1700084M14Rik	6.06226	5.58321	5.40281	5.22485	5.41087	5.59133	5.64687	5.44943
1700086L19Rik	6.27583	6.38044	6.20074	6.4062	6.23483	5.94477	6.78896	6.45587
1700088E04Rik	9.99997	9.30003	9.31963	9.4097	10.1364	9.5207	9.18276	9.66015
1700093K21Rik	6.88743	6.34786	5.79368	5.72198	6.42635	5.63823	5.84432	5.88831
1700102P08Rik	6.13648	5.72175	5.22781	5.77176	5.4768	5.26706	5.24101	5.30284
1700109H08Rik	8.73655	8.60693	8.88071	8.64333	9.62131	9.98287	9.95421	9.71409
1700110I01Rik	6.60252	6.62424	6.72031	6.84473	6.42988	6.39966	6.34222	6.50634
1700113H08Rik	4.922	4.9344	5.29006	4.95796	5.09122	5.40131	5.02396	5.07515
1700120K04Rik	4.88246	4.73992	4.64203	4.8462	5.00284	4.90719	4.97627	5.54771
1700122O11Rik	3.43136	3.39153	3.58359	3.81995	3.83561	3.97836	4.1334	3.77635
1700123K08Rik	4.99464	5.39365	5.55936	4.83407	5.82887	5.74062	5.1812	5.35827
1700123O20Rik	10.1088	10.8429	10.7439	10.5214	10.0957	10.7589	10.6466	10.4569
1700128F08Rik	3.27366	3.03188	2.78414	3.25775	3.05241	3.23333	2.95322	2.74826
1700129C05Rik	3.49106	3.76473	3.71134	3.54006	3.91283	3.84869	3.46641	4.23523
1810009J06Rik	4.16236	3.86864	4.05007	3.53591	3.67053	4.18717	4.09728	3.6762
1810009N02Rik	2.88424	2.96861	2.95763	2.83363	3.19325	3.10994	3.06554	2.88324
1810010H24Rik	10.0335	9.3661	8.88233	9.65722	9.38419	8.7512	8.70346	9.1316
1810024B03Rik	7.5013	6.18352	6.04607	6.01638	6.00591	6.56889	6.09899	6.20214
1810030O07Rik	10.9089	11.3399	11.1716	11.1299	11.0499	10.8088	11.0205	10.7953
1810037I17Rik	10.8508	10.9857	10.9105	10.881	10.8778	10.8905	11.0766	10.5733
1810055G02Rik	9.81249	8.41518	9.66646	9.53249	9.83687	10.9806	10.3716	10.399
1810062G17Rik	4.13337	3.79298	3.91731	3.76754	3.75925	4.03619	4.22514	4.07269
1810064F22Rik	3.89942	4.57285	3.69986	3.91324	4.76703	4.26104	4.15346	3.41709
1810065E05Rik	12.1638	13.1605	11.9977	11.8146	10.0911	11.1707	12.4082	11.613
2010003K11Rik	9.09932	10.2476	10.955	10.6708	10.1778	11.1678	10.791	10.5943
2010016I18Rik	9.8689	9.04205	8.92447	8.55855	8.29838	8.54246	8.60038	8.79842
2010106E10Rik	15.9823	15.6521	15.7491	15.9355	14.8427	15.3846	15.0449	15.2402
2010109A12Rik	4.38151	4.71756	4.38256	4.90423	4.83793	4.54058	5.19305	4.93327
2010315B03Rik	12.4854	12.2742	12.3775	12.3737	11.766	11.3076	11.4112	11.516
2200002D01Rik	15.8766	15.59	15.407	15.8287	15.2745	15.8537	15.8459	15.546
2200002J24Rik	3.93812	3.67294	3.55965	3.91055	3.81486	3.5052	3.56782	3.8306
2210016L21Rik	10.8503	10.1474	10.0203	10.3653	10.276	10.0643	10.3833	9.84939
2210408I21Rik	7.33813	7.80624	7.99025	7.61301	7.17291	6.95886	7.36131	7.20282
2300002M23Rik	4.73884	4.61923	4.70838	4.51831	4.66542	4.48219	4.45395	4.68555
2300009A05Rik	8.78105	8.69577	8.99723	9.22086	9.3459	9.53699	9.62787	9.49875
2310001K24Rik	4.09132	4.4262	4.41847	4.23418	4.85238	4.31081	4.59488	4.08826
2310002L09Rik	5.16213	4.56169	4.78199	5.03998	4.50148	4.89198	4.55166	5.09976
2310009B15Rik	4.35959	4.13915	4.18175	4.5294	4.8217	4.45553	4.6455	4.59602
2310011J03Rik	6.10991	6.45693	6.90334	7.02608	6.56142	7.06592	7.10452	7.17138
2310022A10Rik	8.76943	9.33458	9.27712	9.06927	8.91668	9.00124	8.83775	8.99301
2310022B05Rik	6.80067	6.6851	6.40406	6.35321	6.26668	6.85498	6.72168	6.23589
2310030G06Rik	10.0904	9.29152	9.08175	9.20731	9.10628	9.10414	8.95336	8.52533
2310033P09Rik	11.6734	11.3252	11.5736	11.3528	11.0285	10.8933	10.906	10.7984
2310039H08Rik	7.41671	7.19023	7.13119	7.31958	6.90319	7.54841	7.56689	7.22599
2310057J18Rik	5.07582	5.56994	4.76363	4.90114	4.94458	5.47524	5.05207	5.40588
2310057M21Rik	8.45164	8.32959	8.71749	8.45458	8.60338	8.31382	8.22869	8.53877
2310061I04Rik	11.8826	11.5417	11.5799	11.6336	10.9809	11.439	11.4662	11.1374
2310068J16Rik	4.54288	5.01084	5.03827	5.00987	4.99096	4.92748	5.35131	5.02822
2310079G19Rik	3.19406	3.39114	3.30637	3.27357	3.48538	3.20624	3.38309	3.46883
2410002F23Rik	10.9746	11.2975	11.3247	11.599	11.5679	12.6387	12.1852	12.3059
2410004B18Rik	8.49558	8.05363	8.11071	8.2102	7.69657	8.66269	8.27074	8.49128
2410004P03Rik	5.40451	4.74418	4.73747	4.52658	4.85007	4.71907	4.83375	4.62532
2410017I17Rik	4.87989	5.46761	5.26883	5.22621	5.08022	4.90745	5.14376	5.00957
2410124H12Rik	3.04852	2.72963	2.64489	2.69779	2.76543	2.77348	2.57673	2.84638
2410137M14Rik	3.12176	3.81811	3.82626	3.41331	3.20915	3.18481	3.1987	3.18906
2510002D24Rik	6.78569	6.36506	6.15591	6.12637	6.73567	6.42426	6.49028	6.10316
2510009E07Rik	7.96406	7.87161	7.67565	8.14182	7.23238	7.86345	7.26728	7.3179
2510039O18Rik	8.89059	8.99168	8.87664	8.94567	8.81481	9.21122	9.15322	8.94513
2610005L07Rik	16.9166	16.9416	17.0101	17.0984	16.5265	16.4846	16.5314	16.6317
2610008E11Rik	9.20933	9.5959	9.49159	9.42429	8.69203	8.86964	9.02824	9.15907
2610028H24Rik	7.06379	6.50756	6.41746	6.43042	6.71286	6.4051	6.31324	6.44411
2610203C22Rik	5.7039	6.01471	5.62381	5.46319	6.07952	5.70413	5.51255	5.73834
2610306M01Rik	4.81248	4.3723	4.60595	4.48202	4.73963	4.08451	4.39794	4.06729
2610318N02Rik	4.9599	4.6995	4.92738	4.97518	5.13641	5.79213	5.25295	5.06731
2610524H06Rik	6.093	6.42587	5.91865	6.50691	6.23949	6.22957	6.5251	6.48278
2610528J11Rik	11.7784	11.2545	11.0349	10.9306	11.1465	11.6134	11.4613	11.1843
2700046A07Rik	7.09898	7.44771	7.05283	6.63955	7.32685	7.56522	7.09326	6.95922
2700049A03Rik	6.77971	7.31171	7.45731	7.36183	6.70979	6.7469	6.91875	7.0758
2700062C07Rik	8.2987	7.71975	7.51474	7.37167	8.01835	8.06199	8.27195	8.01906
2700097O09Rik	9.63371	9.40354	9.2876	9.22316	8.93164	8.55664	8.92827	8.6705
2810004N23Rik	9.62017	9.11925	9.0811	8.71528	8.568	8.92753	9.00752	8.31366
2810021J22Rik	9.92377	9.68246	9.89652	9.46279	9.43034	9.06514	9.49821	9.61474
2810025M15Rik	8.872	7.93734	8.07185	8.11351	8.31761	7.58456	8.06217	8.25932
2810032G03Rik	5.18983	5.56603	5.25012	5.41984	5.04349	5.14126	5.52663	5.69097
2810408A11Rik	7.06276	7.57329	7.74782	7.54629	8.56784	7.42011	7.19504	7.96063
2810459M11Rik	6.52698	6.20705	6.38974	5.81682	6.0995	5.99177	6.40564	6.10505
2900026A02Rik	11.3849	10.9024	10.7724	11.2219	9.19578	10.8453	10.738	10.2044
2900060B14Rik	14.2412	13.6544	13.7735	13.7554	12.8676	14.056	14.2863	13.9849
2900092C05Rik	4.50047	4.22037	4.19363	3.82244	4.59934	4.45622	4.24317	4.67442
3110009E18Rik	7.80086	7.42845	7.72156	7.48317	8.17117	6.97747	7.17287	6.22656
3110021A11Rik	4.69661	4.4968	4.43113	4.38268	4.48666	4.14133	4.46701	4.54831
3110039M20Rik	5.14603	5.00313	4.54313	5.08371	5.02949	5.05346	5.05915	5.13807
3110040N11Rik	9.54454	8.767	9.03605	8.73331	8.94074	8.01835	8.39707	8.43907
3110070M22Rik	6.64266	6.80368	6.73084	6.62482	6.55317	6.54359	6.83032	6.11898
3110082I17Rik	10.9824	11.3427	10.9679	10.7059	11.4863	11.3058	10.9263	11.2609
3110082J24Rik	6.80709	6.38126	6.40672	6.42591	6.39952	6.64807	6.20298	6.64523
3300002I08Rik	9.2919	9.93595	10.061	10.0789	9.36859	9.30847	9.14744	9.68386
3425401B19Rik	5.65066	5.62858	5.28624	5.60703	5.78438	4.95852	4.88124	5.43573
3830403N18Rik	6.13095	5.1683	6.10813	5.9981	7.55706	5.35661	6.04588	5.13384
3830408C21Rik	6.92409	6.25742	6.35081	6.39469	6.52043	6.56884	6.59909	6.8601
3930402G23Rik	6.0825	5.7631	5.6832	5.71131	6.08435	5.99103	6.19647	5.61431
4632415L05Rik	7.59405	7.77579	7.82645	7.75955	7.21	7.52344	7.55966	7.89723
4732471J01Rik	7.74642	7.44667	7.46595	7.75856	7.61586	7.56549	7.32084	7.44968
4833420G17Rik	11.4026	11.3056	11.4493	11.6102	10.6562	10.8932	11.0186	11.1155
4833439L19Rik	16.1196	14.8819	14.8313	14.7392	14.1949	14.8039	14.8233	14.6224
4921504E06Rik	3.87518	4.09986	3.99989	3.50225	3.91633	3.9519	4.5102	4.2346
4921509C19Rik	6.38727	6.20267	6.13984	6.11928	6.7423	6.24848	6.40412	6.47884
4921511C20Rik	4.68572	5.01158	4.76346	4.79584	4.65046	4.41392	4.43825	4.55626
4921513I03Rik	3.63641	3.84414	3.94879	3.62747	4.45967	4.47093	3.94067	4.17351
4921517D22Rik	5.11324	4.90649	4.71884	5.22575	5.02786	5.07864	4.87235	5.22964
4921524J17Rik	7.55147	7.02718	7.25418	6.78562	6.92344	6.70707	6.55271	6.97063
4921524L21Rik	4.30779	4.23265	4.39571	4.13618	4.47888	4.29361	4.13054	4.38931
4921536K21Rik	5.89296	5.29095	5.25661	5.24555	5.28574	5.06688	5.15464	5.24897
4921539E11Rik	4.52561	4.74894	4.72748	4.87869	4.7981	4.25959	4.32885	4.62427
4930402F06Rik	3.68966	3.40549	3.82058	3.47102	3.54131	3.4072	3.18052	3.60995
4930402K13Rik	4.8147	4.48043	4.70073	4.94123	4.79158	4.87289	4.98507	4.74549
4930407I10Rik	3.62274	3.65546	3.55648	3.63	3.5718	3.98159	3.25656	3.68116
4930426D05Rik	4.40157	5.31454	5.02638	5.20487	5.10292	4.98558	4.9337	5.2593
4930426L09Rik	5.02912	4.72526	4.69091	4.83248	4.65407	4.94416	4.59898	4.74402
4930429B21Rik	4.88777	5.21495	4.60986	4.54201	4.40433	4.43698	4.68835	4.09344
4930431F12Rik	8.16507	8.00733	7.81917	7.61846	8.02218	8.12678	7.88038	8.2917
4930432M17Rik	4.88251	4.35189	4.34394	4.40386	4.3009	4.28402	4.29496	4.30458
4930433I11Rik	3.17248	3.39976	3.58197	3.2571	3.54212	3.08934	3.69299	3.52485
4930433N12Rik	4.56188	4.50206	4.67126	4.55099	4.21125	4.8744	4.15525	4.5926
4930438A08Rik	4.82776	4.56541	4.09669	4.32709	4.35054	4.7155	4.12345	4.16569
4930444P10Rik	4.45905	4.22462	4.4285	4.02437	4.6108	4.1603	3.93248	4.15408
4930447A16Rik	4.41883	3.52128	3.97586	4.05578	4.07533	4.44924	4.37062	4.45854
4930447C04Rik	5.54915	5.3237	4.54896	5.64062	5.05623	4.51829	4.82662	4.55983
4930449E01Rik	6.21762	5.56565	5.56463	5.15937	5.93361	5.79605	5.73077	6.03894
4930449I24Rik	4.7969	3.57663	3.99648	4.08755	3.80268	3.7659	4.09928	3.9207
4930451I11Rik	5.3502	5.97325	5.1015	4.03212	5.8626	5.14171	5.42665	5.82424
4930453H23Rik	4.81072	5.00544	4.62041	4.51429	4.57745	5.2485	4.68573	4.23936
4930453N24Rik	10.8835	11.0427	10.7174	11.1828	10.9519	10.9761	10.9402	10.9586
4930455H04Rik	3.44328	2.8078	3.33406	3.03633	3.14712	3.06532	3.16483	3.38663
4930470P17Rik	2.96841	3.95637	3.66067	3.70575	3.67988	3.59495	3.8062	3.5724
4930474M22Rik	3.88741	4.09414	4.13731	3.86757	4.47186	3.79148	3.95151	4.25617
4930474N05Rik	3.54832	3.23495	3.35408	3.48283	3.62073	3.42248	3.6625	3.39936
4930480E11Rik	4.34637	3.99825	3.43899	4.30082	3.98103	4.07166	4.038	3.85364
4930481A15Rik	6.93791	7.21115	6.94254	7.02651	7.11239	7.02703	6.9643	6.76727
4930486L24Rik	4.44693	4.28824	4.65326	4.74584	5.15812	4.87122	4.81584	4.77101
4930503E14Rik	5.73908	5.2565	4.96516	4.87608	4.99011	4.81551	4.85762	5.30568
4930503L19Rik	7.27336	6.84368	7.12116	7.16671	7.37948	7.28543	7.9432	7.07137
4930505A04Rik	4.02837	4.10624	3.81808	4.27968	3.82291	4.07912	4.01097	3.83878
4930507D05Rik	3.61837	3.33946	3.39742	3.28186	3.47562	3.64901	3.42204	3.89208
4930512B01Rik	6.21333	6.33321	6.40869	5.90764	6.46532	6.04079	6.4632	6.56318
4930512M02Rik	5.4892	5.47276	5.6588	4.76218	5.62348	4.90838	5.85824	5.5845
4930513O06Rik	5.51681	5.19269	5.34991	5.106	5.20017	5.47449	5.15931	5.1817
4930515G01Rik	5.39913	5.11461	4.77194	4.8014	4.6894	4.5362	4.65574	4.27957
4930519F16Rik	3.81883	3.77246	3.50536	3.20468	3.62314	3.15056	3.70108	3.37864
4930519G04Rik	4.20449	4.08471	3.93956	4.15116	4.31902	3.92723	4.66445	4.41021
4930522H14Rik	3.97038	3.9062	3.55209	3.73982	3.78932	3.9354	3.96486	4.11952
4930523C07Rik	7.04159	7.17831	6.66473	7.78033	7.93534	7.17708	7.85168	7.67331
4930524B15Rik	4.58329	4.60455	4.77584	4.48479	4.53588	4.36374	4.70591	4.95532
4930529C04Rik	6.02349	6.21615	6.66321	5.59714	6.32118	6.03683	6.05818	5.78651
4930544D05Rik	8.36819	8.55561	8.7935	8.70726	8.74443	9.05745	8.85328	9.14434
4930544G11Rik	4.6901	4.52823	4.78937	4.28176	5.3533	4.49527	4.63599	4.76942
4930546C10Rik	4.26175	4.53145	4.85832	4.2721	4.42506	4.47063	4.34625	4.66191
4930548G14Rik	4.63219	5.43827	5.333	4.77327	5.34972	5.36139	4.39259	4.58317
4930550C14Rik	5.92458	6.41106	6.32348	5.92059	6.8446	6.51478	6.31383	7.23885
4930555G01Rik	5.25484	5.33346	5.4451	5.50236	5.49408	5.23538	6.19764	5.49841
4930558K02Rik	5.63452	5.19761	5.45341	5.65411	5.75304	5.25966	5.68699	4.95724
4930562C15Rik	4.70608	4.74417	4.64039	4.96769	5.03646	4.29065	5.11904	4.905
4930562F07Rik	4.03625	3.90594	4.30117	4.00227	3.99152	3.60219	4.52284	4.46898
4930563E22Rik	3.58932	3.65342	3.81228	3.62155	4.01384	3.93232	3.76434	3.50302
4930563M21Rik	4.11712	4.9536	4.15498	4.65303	4.28641	4.18949	4.12717	4.47229
4930564C03Rik	4.30663	3.76004	3.59163	4.01194	3.9215	3.75756	4.03276	4.18726
4930564D02Rik	4.45301	4.35838	4.20126	4.23822	4.05358	4.33487	4.14602	3.9474
4930565D16Rik	4.05804	3.57314	3.84536	3.60013	3.80934	3.61023	3.83559	3.80527
4930568D16Rik	3.88426	3.82617	4.00727	4.13577	3.68474	3.91041	4.29326	3.98024
4930571K23Rik	4.1537	3.83876	3.26438	3.63726	3.53174	4.14541	3.62438	3.72607
4930578I06Rik	5.36516	4.2036	4.26699	4.31218	4.72823	4.47187	4.61686	4.66475
4930579F01Rik	3.25987	3.17678	2.96057	3.00223	3.17334	3.00304	2.88903	3.15565
4930579G24Rik	5.61809	6.02404	5.83624	5.5569	4.82309	5.33973	5.87995	5.26545
4930579K19Rik	5.42945	5.38979	5.37543	5.65721	5.1555	5.01177	5.55159	5.28839
4930583I09Rik	3.51482	3.9286	3.50558	3.19302	3.4596	3.29804	3.45263	3.53425
4930584F24Rik	4.92866	4.27909	4.81064	4.65101	4.5671	5.11515	4.73254	4.76551
4930590J08Rik	5.01109	4.42006	4.2924	4.16048	5.02239	3.80149	4.62645	5.00801
4930591A17Rik	5.15992	4.6577	4.81967	4.45915	5.20655	4.25808	4.98367	4.58109
4930595M18Rik	5.46704	5.54488	5.21479	5.05168	5.24796	5.39824	5.24669	5.07433
4930596D02Rik	3.79077	3.38719	3.39656	3.58815	3.54243	3.38257	3.73579	3.69415
4931406C07Rik	14.5434	14.9247	15.0981	15.3657	14.0872	14.2479	14.3159	14.2305
4931406H21Rik	7.83556	8.03825	8.04946	8.43581	8.13315	7.1895	7.76771	8.11072
4931414P19Rik	5.49605	5.17372	5.65283	5.2667	4.69103	4.46217	4.63005	4.81656
4931429L15Rik	7.77444	6.8374	7.08904	6.71044	7.01911	6.69468	6.67512	7.11851
4931429P17Rik	4.62974	4.27868	4.26507	4.22707	3.96886	4.52253	4.05097	4.02879
4931440P22Rik	4.08415	4.89753	4.77524	4.34319	5.29812	4.87827	4.32862	4.80886
4932414J04Rik	4.704	4.88707	4.90499	5.10057	4.79809	5.0148	4.81298	5.07928
4932414N04Rik	4.9303	5.08594	4.40708	4.25091	4.66041	4.5289	4.5084	5.03674
4932415M13Rik	4.61944	4.97652	3.96211	4.59963	4.57668	4.3195	4.81509	4.59355
4932416K20Rik	4.9917	4.81414	4.76373	4.91451	4.75588	5.48831	4.82583	5.09485
4933401B06Rik	4.50031	4.50306	4.43952	4.20103	4.63214	4.32968	4.10916	4.77287
4933402D24Rik	4.28422	3.94305	4.15182	4.01047	3.89573	3.44739	3.76506	3.70551
4933402J07Rik	5.96899	5.55092	5.61143	5.53496	5.53423	5.79635	5.89263	5.65989
4933402N03Rik	4.48541	4.22783	4.13616	4.20425	4.24335	3.9112	3.97514	4.50984
4933405L10Rik	4.30415	4.0236	3.83084	3.91668	4.09102	4.5	3.9527	4.21299
4933405O20Rik	4.80398	4.20422	4.45968	4.08113	4.27325	4.20993	4.28336	4.16085
4933407L21Rik	6.38448	5.83902	5.73297	5.84362	5.7345	6.13974	5.77477	5.94426
4933408J17Rik	4.18994	4.08612	3.53222	3.74292	3.86799	3.73353	3.79386	3.70592
4933409G03Rik	6.22627	6.06065	6.01484	5.61888	6.0673	5.22391	5.30275	5.87549
4933409K07Rik	5.53001	5.82963	5.64979	5.81839	5.76245	6.42731	5.5381	5.33213
4933411G06Rik	4.08141	4.18622	3.57547	3.90229	3.90166	4.15519	3.90358	3.95571
4933411K16Rik	4.90781	4.55063	4.43533	4.89393	4.88134	5.03953	4.55928	4.49849
4933412E24Rik	4.0034	3.86538	3.51297	3.63467	3.8109	3.97057	3.42107	3.57017
4933414I15Rik	6.32138	6.2653	5.99169	5.77324	6.50651	5.73936	5.93086	6.36799
4933416I08Rik	5.13833	4.05765	4.14664	4.34071	3.8593	4.23507	4.18663	4.05
4933421I07Rik	4.62782	4.41739	4.20431	4.20476	4.26941	4.59265	4.58417	4.7651
4933427D06Rik	4.64442	4.8323	4.60854	4.8801	5.14178	4.69549	4.79034	4.84219
4933427D14Rik	7.92134	8.63185	9.05373	8.86216	7.73646	8.28832	7.9809	8.00304
4933427E11Rik	2.77796	3.06401	3.03935	3.13491	3.23282	2.89171	3.239	2.9922
4933428G20Rik	4.90229	4.73708	5.46781	4.95071	5.17697	4.76191	4.74631	5.05305
4933428M09Rik	5.29246	4.92286	5.14532	5.15887	4.89255	4.8368	4.53286	4.47997
4933430I17Rik	3.90536	3.93926	3.67176	3.7277	4.12567	3.67906	3.73162	4.03517
4933434E20Rik	10.1064	11.3945	11.0473	10.7572	10.3581	10.7714	10.6325	10.4985
4933436I01Rik	3.98222	3.12536	3.13669	2.95029	3.62412	3.01281	3.20211	2.71897
4933440M02Rik	4.30896	3.38863	4.42652	4.21134	4.00502	3.93719	4.37769	4.02886
5031410I06Rik	4.89276	4.67833	4.84729	4.41187	4.95251	5.22227	4.83519	5.06866
5031425E22Rik	6.17793	8.08459	8.17594	8.10103	6.98093	7.03764	7.16901	6.89494
5031434C07Rik	4.11637	4.05022	3.71435	3.95576	4.35906	4.20654	3.89799	4.25941
5031439G07Rik	9.64466	10.5805	10.7962	11.093	11.0746	11.2251	11.5045	11.3424
5330439B14Rik	5.21897	4.7919	4.54679	4.68058	5.87458	4.68193	4.52545	5.1031
5430401F13Rik	4.59954	4.2942	4.2108	4.31696	4.28048	4.34054	3.82111	4.20176
5430402E10Rik	7.22159	5.7556	5.40008	5.97603	6.57958	6.44329	5.43718	5.90341
5430405H02Rik	8.95847	8.95248	8.85909	8.75521	8.73612	8.65717	9.36684	8.49349
5530400C23Rik	4.27783	3.75835	4.06539	4.06655	3.94887	4.49149	4.2801	4.11035
5530401A14Rik	3.86168	3.3975	3.26376	3.73959	3.44118	3.34586	3.21612	3.40271
5730409E04Rik	5.97959	5.73257	5.41732	5.65997	5.83875	5.45285	5.78439	5.7897
5730455P16Rik	6.67238	7.32804	7.44566	7.37301	7.23032	7.55721	7.75861	7.24962
5730460C07Rik	4.35933	4.31292	4.55116	4.50861	4.75937	4.57546	4.23404	4.96485
5730480H06Rik	5.40321	5.7758	6.06342	5.89158	4.70699	4.66161	5.93672	5.34647
5730507C01Rik	11.6325	11.0892	11.293	11.0631	9.99381	10.0275	10.0181	10.1465
5730522E02Rik	5.55087	5.1848	5.26113	4.87815	5.57272	5.33601	5.28802	5.83331
5830417I10Rik	10.3383	10.4299	10.5105	10.5181	9.32301	9.74987	9.71457	9.75362
5830454E08Rik	4.70686	4.92218	5.01015	4.68171	4.89492	4.52005	4.61094	4.80236
5930403L14Rik	3.65118	3.30337	3.43066	3.34863	3.20399	3.24099	3.14355	3.11991
6030458C11Rik	7.03439	7.54679	7.43469	7.42393	7.40019	7.24371	6.94417	7.3388
6030468B19Rik	5.38897	4.56711	4.57435	4.63774	4.42199	4.91375	4.52123	4.58075
6030469F06Rik	7.72237	7.69411	7.56452	7.49744	7.7639	7.83079	7.86225	7.90203
6030498E09Rik	5.88277	5.93361	5.28582	5.3426	5.61272	5.38029	5.64713	5.77949
6330403K07Rik	5.52114	5.0933	5.52836	5.93526	6.37197	5.18765	5.74854	5.6841
6330409D20Rik	4.33514	4.34568	4.29939	4.44374	4.11541	4.08927	4.18021	4.22272
6330415B21Rik	3.72306	4.32903	3.65877	3.8891	4.15649	4.4339	4.87278	4.28439
6430503K07Rik	8.72399	9.2433	8.83533	8.88628	8.99701	9.53998	9.24979	9.5967
6430548M08Rik	7.25107	8.00457	8.51718	7.82782	10.1651	9.29802	9.96601	9.67881
6430550D23Rik	7.19161	7.06732	7.03482	7.19045	7.24895	6.4658	6.60277	7.03905
6430571L13Rik	3.47467	3.43599	3.64649	3.73445	3.82619	3.69598	3.50694	3.8046
6820408C15Rik	5.58618	5.0768	5.50233	4.91803	5.11556	4.84879	5.25921	5.20367
6820431F20Rik	15.4776	15.532	15.6021	15.7431	15.2101	15.2255	15.1183	15.2035
7530416G11Rik	8.22822	7.69707	7.5606	7.88228	7.87957	8.20769	7.74151	8.08841
8430423G03Rik	5.38686	5.29464	4.70523	4.95768	5.66437	4.69026	4.94362	4.95848
9030612E09Rik	3.28814	3.3253	3.41172	2.8534	3.30523	3.39393	3.4458	3.2305
9030619P08Rik	7.79262	7.55946	7.79788	8.20277	8.06113	8.72297	9.13461	8.58333
9030624G23Rik	8.50564	8.7458	8.54635	8.2346	7.69015	7.62066	7.74218	7.44504
9130008F23Rik	8.69968	9.71441	9.17944	8.15359	9.69017	9.80964	10.2844	9.90652
9130023H24Rik	8.35734	8.38594	8.30813	8.2167	7.58802	7.63423	7.56219	7.88873
9130221H12Rik	3.19614	3.04795	3.03797	3.31679	3.19158	3.20162	2.96836	3.23783
9130230L23Rik	8.87907	9.32617	9.15997	8.81779	8.56943	8.2081	8.58964	8.68952
9130401M01Rik	6.94809	7.73592	7.83382	7.67041	7.8767	7.97756	8.50505	8.05253
9230009I02Rik	3.44863	3.04002	2.9587	2.90758	3.00303	2.78064	3.28675	3.04978
9230112D13Rik	5.41351	4.56778	4.41813	5.29334	4.92473	4.5098	4.6234	4.76626
9330151L19Rik	11.0532	10.6282	10.9193	11.0483	10.4829	10.5754	10.3724	10.0801
9330159F19Rik	6.65175	6.51556	5.97056	6.46648	6.51644	5.87025	5.64093	6.42201
9330182O14Rik	3.98517	3.15819	3.60381	2.97617	3.82019	2.88617	3.67201	3.96644
9430015G10Rik	6.91203	7.35527	7.6148	7.22368	6.57187	7.10346	6.65345	6.46666
9430038I01Rik	8.62964	8.49066	8.68641	8.44838	8.24145	8.27939	8.44085	8.11548
9430069I07Rik	3.40487	4.71244	4.64908	4.83478	4.73592	4.58211	5.00931	4.7383
9530002B09Rik	4.47473	4.33212	4.13647	4.32271	4.2126	4.38705	4.36993	3.8515
9530068E07Rik	11.8941	12.672	12.4059	12.4957	12.2752	12.5237	12.8312	12.4671
9630028B13Rik	5.43623	4.53599	4.07766	4.23659	4.6492	4.43438	4.55716	4.13633
9830107B12Rik	4.2331	4.25824	4.06583	4.5094	4.77066	4.21176	4.79374	4.79968
9930012K11Rik	5.46384	5.01699	4.85985	4.6471	5.44907	4.48734	4.96308	4.73554
9930111J21Rik1	10.9044	11.9575	11.2701	12.4565	10.2574	10.8026	10.5155	10.5687
9930111J21Rik2	11.0164	11.7715	11.1612	12.4198	10.1191	10.9147	10.5024	10.4944
A130010J15Rik	6.46884	6.6483	6.4947	6.42464	6.11954	5.92502	6.29118	5.92664
A1bg	4.02228	3.88666	4.00704	3.90577	4.0184	4.01736	4.08143	3.81528
A1cf	14.4901	14.7778	14.8741	14.3078	13.0962	13.993	13.4726	13.6256
A230020J21Rik	4.69439	4.54251	4.98973	4.79714	4.61163	4.73275	4.96443	4.2784
A2m	5.45939	5.03065	4.97413	6.36433	5.1617	4.88303	4.75912	4.94064
A2ml1	7.18272	6.20707	5.74465	6.04776	6.81804	6.40844	6.39432	6.06603
A330009N23Rik	4.70357	4.50796	4.63781	4.46821	4.08087	4.14538	3.87937	4.35343
A330041J22Rik	4.96934	5.42053	5.31498	4.83326	5.21215	5.15014	4.7728	5.32251
A330070K13Rik	5.43208	4.78792	4.90377	4.76656	5.23889	5.20988	5.30164	5.29747
A3galt2	5.17601	4.33805	4.31242	4.5001	5.4681	5.19634	5.29683	5.18912
A430005L14Rik	10.4316	11.0308	11.3003	10.569	11.722	10.9987	11.0806	10.8308
A430033K04Rik	9.17518	9.3878	9.54498	9.18438	9.23395	8.82183	9.11865	8.8518
A430035B10Rik	6.99627	6.40194	6.1355	6.60361	6.02168	6.07553	6.34707	5.81254
A430093F15Rik	5.20113	5.99485	5.42788	5.73837	5.82407	5.57942	5.5875	5.7427
A4galt	10.5161	9.98396	9.75301	9.90149	11.3946	10.4393	10.6761	10.8855
A4gnt	4.88765	4.21356	4.58284	4.79627	4.31853	4.19156	4.31763	4.2083
A530016L24Rik	5.42671	5.68379	5.96934	6.12157	5.93723	5.12837	6.08313	5.84187
A530053G22Rik	3.04032	3.23212	2.83786	2.6971	3.23177	2.85319	3.4373	3.06768
A530064D06Rik	4.64562	3.84204	3.70135	3.76638	4.14667	4.09949	4.04488	4.11656
A530088E08Rik	5.94572	6.11526	5.69521	6.68334	5.56198	5.51567	5.97268	6.45247
A630001G21Rik	6.00826	6.7476	6.16902	7.61207	5.85558	5.76422	5.613	5.7142
A630010A05Rik	4.47197	4.16351	4.01429	4.76255	4.70744	4.76615	4.20075	4.68466
A630012P03Rik	3.36676	3.38845	2.99949	3.75462	3.05264	3.50209	2.90037	3.46649
A630023A22Rik	5.29893	5.11486	5.13641	4.87904	5.0073	5.04746	5.52761	4.77785
A630073D07Rik	5.14713	4.50734	4.77215	4.28618	4.1823	4.07303	4.12595	3.87078
A630076J17Rik	3.42183	3.03258	3.15767	3.05831	3.32319	3.55814	3.29271	3.4078
A630095N17Rik	5.38248	4.26309	4.80168	3.96659	4.2258	4.77646	4.51231	4.45731
A730008H23Rik	11.6707	12.6773	12.7306	12.6302	11.9482	12.4846	12.3128	12.4053
A730018C14Rik	6.44083	5.57276	5.73283	5.36438	5.35546	5.43376	5.14311	5.35181
A730020M07Rik	6.67082	6.54973	6.46481	6.39325	7.43058	6.13333	6.79578	6.58919
A830018L16Rik	6.30225	5.98759	5.68657	5.8237	5.92173	5.70187	5.97152	6.27931
A830082N09Rik	5.9572	6.06073	6.03384	5.80719	5.92715	5.68338	5.62466	6.06169
A930003A15Rik	3.95066	4.05424	3.9679	5.07459	3.98314	3.88472	4.40102	4.10697
A930004D18Rik	5.50337	5.94712	5.62091	6.06581	6.08886	5.80217	6.15592	6.10905
A930005H10Rik	6.47168	6.09493	5.88821	6.01095	5.77626	5.80238	5.92969	5.39685
A930009A15Rik	6.56383	5.77	5.44701	5.47075	5.82523	5.63286	5.82723	5.95806
A930011G23Rik	7.7329	7.99925	7.80279	7.7762	7.71197	7.61935	7.80499	7.99113
A930016O22Rik	5.57307	4.94838	4.88905	5.02215	4.71216	5.12494	5.08722	5.16779
A930017M01Rik	3.40236	3.66321	3.21684	3.4888	3.5588	3.35556	3.47219	3.41685
A930018P22Rik	6.0328	5.90801	5.69027	5.5007	6.57392	5.73902	5.94998	6.34887
AA414768	2.9798	3.42354	3.18606	3.23924	3.30796	3.26226	3.15614	3.18606
AA467197	16.0908	15.594	15.5108	14.5591	13.8506	14.5556	14.6621	14.4758
AA619741	4.78864	4.4124	4.06798	5.45564	4.80381	4.80696	4.04197	4.69549
AA986860	13.5418	12.7125	13.0235	13.2845	12.8123	13.3747	13.4433	13.0726
Aaas	8.86149	8.53212	9.00173	8.35796	8.41929	9.24883	8.85511	8.62686
Aacs	10.7382	11.8154	12.1603	11.7953	10.507	10.9115	11.5651	11.2321
Aadac	4.49599	4.81596	5.15416	6.59494	8.5178	5.64314	5.12327	5.9448
Aadacl2	3.38493	2.8798	3.20252	3.18434	3.1536	3.17791	3.1225	3.24756
Aadacl2fm1	4.40097	3.70677	3.71523	3.84315	3.77385	3.87153	4.17699	3.74027
Aadacl2fm2	4.3042	4.33464	3.90942	3.90295	3.99933	4.54888	3.91227	4.18447
Aadacl2fm3	4.38749	4.05147	3.97943	3.84835	4.30424	4.28472	3.97496	4.61084
Aadacl3	2.92218	3.35122	3.1244	3.16237	3.50089	3.64827	3.50518	3.42679
Aadacl4	4.44243	3.89895	3.78752	3.39734	3.68461	3.19546	3.44164	3.53687
Aadacl4fm1	3.45559	3.06265	2.9007	3.02467	2.81249	2.99499	3.20986	2.99154
Aadacl4fm2	3.28262	3.91689	3.01719	3.39305	3.70817	3.29151	3.02849	3.48193
AAdacl4fm3	4.78176	4.77068	4.85712	4.45612	5.10215	4.38463	4.41252	4.88697
Aadacl4fm4	5.06066	5.1364	4.6775	4.93538	5.13831	5.75249	4.91662	4.92742
Aadacl4fm5	7.30259	7.56467	7.63009	7.32467	7.62153	7.27536	7.5932	7.92526
Aadat	4.3935	3.2559	3.06447	3.04989	3.94229	3.87716	3.77332	3.65209
Aagab	10.2034	10.8716	10.7068	10.1101	9.79286	9.94794	10.004	10.1096
Aak1	12.763	12.7571	12.7493	12.9784	12.4156	12.5373	12.4819	12.5345
Aamdc	10.0953	10.1115	10.3908	9.87992	10.2379	10.2157	10.2192	9.74953
Aamp	8.03387	9.12591	9.05374	8.87875	8.81563	9.11461	9.19258	9.1344
Aanat	3.69372	3.91955	4.26303	3.9704	4.28135	3.90831	3.88863	4.12331
Aar2	5.8857	6.4009	6.59589	6.47847	6.49434	7.43598	7.0673	7.178
Aard	4.21927	4.36924	4.52976	4.37399	4.34647	4.38214	4.29056	4.35557
Aars2	6.21	5.73902	5.91803	5.74803	5.44545	5.92305	6.06587	5.80023
Aasdh	9.26524	9.89495	9.96902	9.79677	9.53143	8.94975	9.33434	9.03265
Aasdhppt	10.1409	10.8199	10.6613	10.765	10.0452	9.89004	10.3041	9.85894
Aass	6.5238	5.70861	5.84366	5.82468	6.36172	5.71875	5.79581	5.62394
Aatf	11.2499	11.1588	11.0934	11.1945	11.749	11.6807	11.5852	11.4002
Aatk	4.01859	3.94909	4.33859	4.10896	4.21127	4.57645	4.27706	4.1468
AB124611	6.29091	6.6825	5.68414	6.96188	6.7612	5.87313	6.40654	6.17452
Abat	12.5023	13.1939	13.3004	13.4949	13.1384	13.1571	13.302	13.0928
Abca1	9.07502	10.4749	11.0625	11.4999	10.9994	10.8037	10.8522	10.9939
Abca12	7.55551	8.49097	8.56413	8.38662	7.19332	6.16617	9.22608	8.11745
Abca13	5.0812	4.6699	5.35874	3.94597	4.0519	4.82929	4.57941	4.66423
Abca14	7.49847	5.8948	6.18455	6.49703	5.59992	5.92029	5.9578	6.03052
Abca15	4.58029	4.52988	3.93538	4.19522	3.83863	3.80403	3.62144	3.80112
Abca16	3.96158	3.99119	3.89586	4.38802	3.97873	4.17864	3.94412	4.27969
Abca17	5.96697	4.78745	4.77437	5.03316	5.35027	4.76341	5.43103	5.45221
Abca2	4.68848	4.42549	4.75458	4.73427	4.57023	4.88598	4.68468	4.64631
Abca3	10.3553	11.0429	10.9519	11.2851	10.8604	10.9391	10.6295	10.8436
Abca4	4.74566	4.95877	4.77608	4.61643	5.1948	5.18485	4.87286	5.17454
Abca5	4.70728	5.26326	4.9922	5.56458	5.45458	5.43473	5.42268	5.62335
Abca6	4.56775	5.18595	5.31567	5.72958	4.90343	5.31841	4.85676	5.25543
Abca7	5.85188	5.9545	6.20546	6.08282	5.52516	5.71123	5.90395	5.70743
Abca8a	6.65377	6.98439	7.2962	8.04287	7.39096	6.61284	6.615	6.64017
Abca8b	7.36272	7.84216	7.29881	8.04633	7.68836	7.02286	7.18421	7.40048
Abca9	6.42429	7.28327	7.55215	7.64934	7.06469	6.78185	7.2348	6.97635
Abcb10	8.24915	9.51886	9.71316	9.99664	8.1543	9.06375	9.1652	9.17563
Abcb11	4.38636	4.11013	3.86722	4.42943	4.28303	3.74211	4.19177	4.20659
Abcb1a	15.6287	16.0709	16.7217	17.5159	15.8109	15.9716	16.3128	16.1793
Abcb1b	13.7182	14.146	14.8698	15.9542	14.1776	14.051	14.397	14.4339
Abcb4	3.6893	3.35576	3.60633	3.84231	3.59472	3.40497	3.61961	3.5748
Abcb5	4.59053	3.64321	3.59509	3.26638	3.21564	3.99627	3.16493	3.20936
Abcb6	5.19314	6.14236	6.36551	6.70237	6.61903	6.42476	6.43018	6.25992
Abcb7	10.4495	11.0022	10.5002	10.6017	10.1915	10.2417	10.2461	10.4
Abcb8	7.93907	8.37517	8.33935	7.94219	8.09615	8.73555	8.92798	8.38443
Abcb9	8.41078	8.82151	9.22086	8.60699	8.87637	9.04718	8.88744	8.84223
Abcc1	8.57523	8.96556	8.69558	8.80477	10.0719	9.77275	9.82721	9.92984
Abcc10	9.74338	9.76196	10.3667	9.97476	9.53341	9.78851	9.79799	9.33498
Abcc12	3.68012	3.80718	3.64378	3.18284	3.6643	3.48308	3.49078	3.55267
Abcc2	12.07	11.5382	13.2554	15.0181	12.9759	13.5077	12.4063	12.9982
Abcc3	12.4909	13.0925	13.0884	12.526	12.0855	13.2604	13.4758	13.0054
Abcc4	7.7572	8.77611	8.57648	8.87783	8.35249	8.39664	8.82209	8.55901
Abcc5	9.57541	9.96776	10.1384	10.8512	9.80669	9.49074	9.67234	9.51308
Abcc6	5.45871	5.36096	5.00162	5.52355	5.03364	5.32075	5.28927	5.54594
Abcc8	6.88138	5.79574	5.75181	5.59275	6.05233	5.66525	6.27465	6.05659
Abcc9	9.20259	10.3129	10.2771	10.251	10.3921	9.19451	9.91297	9.89807
Abcd1	9.3774	9.98694	10.481	10.073	9.05641	10.0449	9.58923	9.48644
Abcd2	5.95587	7.47678	7.1043	7.17368	7.08301	5.86071	7.53702	7.10269
Abcd3	14.2931	14.5358	14.7652	14.721	14.9982	14.905	14.9058	14.9059
Abcd4	7.50333	7.58508	7.97415	7.56518	7.6498	7.95794	7.51845	7.89872
Abce1	13.7934	14.0485	14.1534	13.9102	13.9355	13.7214	13.9245	14.0759
Abcf1	7.99719	8.88228	9.14615	9.25876	9.15582	9.2205	9.6105	9.40557
Abcf2	10.6691	11.3373	11.3597	11.1766	11.4625	11.6055	11.3237	11.2697
Abcf3	9.10416	9.33359	10.0529	9.67168	9.17367	9.23229	9.26147	9.42734
Abcg1	7.37851	7.14649	7.04315	7.44619	7.16715	7.49618	6.95991	6.85811
Abcg2	15.4058	16.0814	15.82	15.8954	14.503	14.8577	14.8707	14.949
Abcg3	7.30993	7.45743	8.05918	8.35735	7.15537	6.75488	7.33113	7.3557
Abcg4	5.92732	5.58901	5.60952	5.15114	5.56136	5.23283	5.30475	5.14822
Abcg5	13.6867	15.0513	15.1255	15.2279	13.2153	14.5604	13.9532	13.9651
Abcg8	13.4118	13.4647	13.5504	13.5201	11.9337	13.1925	12.5147	12.5764
Abhd1	9.32277	8.83905	9.19775	8.8046	8.58619	8.45827	8.47545	8.62466
Abhd10	6.52462	6.54977	6.88161	6.75657	6.8428	6.5251	6.79512	6.76501
Abhd11	9.26761	9.80782	9.8131	9.84046	10.3268	10.2797	10.0129	10.0764
Abhd12	5.68769	6.61438	7.16592	7.83821	6.17707	6.83135	6.61135	6.77048
Abhd12b	5.25029	5.37009	4.70281	4.48646	5.04741	4.63184	4.44653	5.00157
Abhd13	12.2395	12.7502	12.9898	12.8162	12.3185	12.5689	12.4867	12.5219
Abhd14a	7.66258	7.54832	7.46773	7.23589	7.79791	7.6796	7.83926	7.71674
Abhd14b	11.7076	11.1016	11.0818	10.9739	11.3492	11.7524	11.5857	11.2746
Abhd15	4.40391	4.57008	4.69158	4.67107	4.43432	4.73151	4.74178	4.444
Abhd16a	7.693	7.99139	8.25899	8.10982	7.9732	8.07362	8.41783	8.13485
Abhd16b	4.00845	3.93592	4.07218	3.91903	3.90834	4.09384	3.84743	3.6471
Abhd17a	7.2733	7.78076	8.13374	8.01459	7.34596	8.10909	7.35518	7.52426
Abhd17b	12.3146	12.2568	12.1691	11.6886	12.0766	12.2416	12.3665	12.2766
Abhd17c	13.4692	13.8139	13.8889	13.9314	13.4378	14.0702	13.7658	13.6553
Abhd18	8.01559	8.10279	8.66979	8.47724	7.2666	7.50025	7.10948	7.12608
Abhd2	12.6433	13.8127	13.8245	14.0776	14.5342	14.7221	14.6377	14.7605
Abhd3	13.537	13.2846	13.2453	12.1022	11.6074	12.6834	12.303	12.1192
Abhd4	12.4983	12.3049	12.2885	12.0986	11.9585	12.4234	11.9499	12.0555
Abhd5	10.8003	11.171	11.1272	10.8348	11.1391	11.0717	11.1902	11.1432
Abhd6	12.5695	12.41	12.387	13.1782	12.0757	13.5262	13.4308	12.8387
Abhd8	4.36212	4.25312	4.2772	4.38396	4.1619	4.01142	4.31202	4.54367
Abi1	13.2996	12.6673	12.4743	12.3645	12.3387	12.5022	12.4071	12.3821
Abi2	7.62261	8.16568	7.84882	7.93193	7.53866	7.65559	7.46276	7.38549
Abi3	9.44974	9.16295	8.80477	9.26534	8.41235	8.64568	9.05995	8.95577
Abi3bp	12.817	11.6269	11.4376	11.5475	10.8045	10.3721	10.774	10.5774
Abitram	10.7672	11.2727	10.9561	10.9527	10.2746	10.8018	10.7314	10.6353
Abl1	7.90701	7.98131	8.3576	8.62705	7.7155	7.90836	7.96616	8.0542
Abl2	8.32045	8.36294	8.44528	8.08586	11.1271	10.3396	10.415	10.6631
Ablim1	10.7301	11.7648	11.4367	12.2611	10.4642	10.9308	10.9437	10.8306
Ablim2	5.924	5.62942	5.22979	5.1082	5.46063	5.17697	5.0644	4.85473
Ablim3	5.43776	5.517	5.14778	5.14483	5.79712	5.42888	5.52699	5.73031
Abo	3.82425	3.97865	3.66096	4.15062	4.18668	4.19032	4.28318	4.11958
Abr	13.6521	13.7409	14.0064	13.9333	12.8363	13.7699	13.5815	13.4605
Abra	5.58547	5.10014	4.73442	4.98204	5.23459	4.83403	4.88169	5.06554
Abracl	13.4918	13.7162	13.7873	13.5518	14.2118	13.513	13.8325	13.5253
Abraxas1	10.3405	10.5511	10.5297	10.5202	9.9121	9.63931	9.357	9.87492
Abraxas2	11.9873	11.973	11.9434	11.6958	11.5359	11.3313	11.6474	11.6214
Abt1	6.45472	6.90225	6.84202	6.80835	7.14346	7.32605	7.46534	6.91805
Abtb1	4.84573	5.21333	5.13768	5.54886	4.67474	5.3076	5.43273	5.42797
Abtb2	5.47825	4.99385	5.0257	4.97735	5.4613	5.39778	5.70512	5.33165
Abtb3	3.56711	3.89446	3.56141	4.33078	3.88654	4.23989	4.03694	3.98034
Acaa1a	11.2833	11.5019	11.887	12.2199	11.5218	12.0768	11.7445	11.8933
Acaa1b	8.37185	8.63971	8.38556	9.31336	8.44797	9.27479	9.30821	9.09
Acaa2	11.7861	12.0549	12.3677	13.0692	13.3	13.0851	13.1022	13.2086
Acaca	9.63087	11.0015	10.9451	10.7562	9.99079	9.97111	10.6542	10.036
Acacb	8.21417	7.91628	8.50403	8.37848	8.4747	8.27901	8.52547	8.44308
Acad10	6.2305	6.28263	6.34481	6.33943	6.11454	6.24289	6.54755	5.98731
Acad11	9.53659	9.71765	10.1575	9.64705	9.0996	9.97696	9.43285	9.33236
Acad12	8.96597	7.58375	7.39247	7.83189	7.40668	7.14637	6.83249	6.7423
Acad8	9.72706	10.7474	10.5804	9.96848	10.7039	10.6774	10.5958	10.6442
Acad9	8.5936	9.71575	9.92858	9.22807	9.4319	9.14452	9.60826	9.54745
Acadl	13.9151	13.3594	13.4002	13.4772	12.8535	13.8867	14.2204	13.8468
Acadm	12.0128	12.2579	12.3038	12.3008	12.1114	12.116	12.0935	12.1566
Acads	9.66357	9.45906	9.62822	9.71327	9.43863	9.40257	9.82586	9.58381
Acadsb	7.39222	8.45453	8.33241	8.21454	8.7318	7.93869	8.61614	8.68517
Acadvl	10.4796	11.2115	11.6174	11.5316	11.6391	12.4703	12.116	12.1716
Acan	6.82639	7.04523	7.15818	6.78368	7.32496	6.69811	6.92784	7.38006
Acap1	6.79443	7.37318	6.77724	7.90968	5.65535	6.64875	6.33181	6.29671
Acap2	12.815	13.4342	13.3809	13.4489	12.9866	12.98	12.958	13.0834
Acap3	9.27614	9.35819	9.41745	8.90123	10.1621	8.90613	9.24198	9.55028
Acat1	13.0133	12.5389	12.5944	12.5475	13.0538	13.0157	13.1695	12.7747
Acat2	11.3603	11.9758	11.7511	11.55	10.9679	11.5311	11.3834	11.1252
Acat3	8.50466	9.33698	9.03493	8.98974	8.6037	8.77387	9.07856	8.63346
Acbd3	12.0082	12.0747	12.0469	11.8575	12.078	11.8547	11.9356	12.0769
Acbd4	7.57723	8.60337	8.82563	8.40419	8.04561	8.56511	8.42052	7.66083
Acbd5	12.0234	12.2807	12.4602	12.0297	11.3652	11.5359	11.5466	11.7721
Acbd6	10.0322	10.3521	10.2897	10.4033	10.6516	10.9528	10.7106	10.6181
Acbd7	4.32052	4.24402	4.09085	4.4161	4.04263	3.86105	4.11455	4.44906
Accs	5.94282	6.01954	6.10293	6.04587	6.04573	6.35558	5.89437	6.50905
Accsl	5.55447	5.52087	5.12927	4.88794	4.8556	5.50015	5.1016	4.73991
Acd	7.43528	7.59425	7.94238	7.64766	8.11706	8.02451	8.1774	7.54573
Ace	13.4433	13.1819	13.8564	14.1358	12.5548	14.1744	13.3924	13.6357
Ace2	16.7699	16.8519	17.0447	17.1847	16.1248	16.7477	16.514	16.6163
Ace3	4.56502	3.82833	4.20689	4.19251	4.62652	4.0648	4.34329	4.22439
Acer1	5.49399	6.05842	6.68013	7.62936	6.75802	6.03516	5.81273	6.21736
Acer2	6.51053	6.79445	7.42394	7.29041	8.03326	8.14608	8.63383	8.0458
Acer3	9.22352	8.94792	9.41253	8.47878	9.62013	9.7074	9.38195	9.71063
Ache	5.52961	5.66457	5.59754	5.74048	5.96367	5.67387	5.75178	5.59113
Acin1	10.8542	11.001	11.1836	11.2096	10.8238	11.0369	11.0167	11.17
Ackr1	7.4072	7.23424	6.9993	7.38507	9.18246	8.48065	8.64009	8.69722
Ackr2	7.70977	6.70577	6.31161	7.23567	6.80015	6.21995	7.2288	6.85439
Ackr3	7.22973	6.75505	6.68492	6.33086	8.46042	7.94157	8.29428	8.08197
Ackr4	6.13842	6.15714	5.98808	6.17889	6.05592	6.47949	5.91788	6.13473
Acly	11.702	12.8847	12.9368	12.4264	12.3556	11.6304	12.4551	12.2
Acmsd	4.24334	3.98642	3.98725	3.88013	3.90506	4.14594	4.05238	3.53886
Acnat1	9.86774	11.1762	10.8773	10.576	8.52922	9.18283	8.92058	8.82173
Acnat2	8.68064	9.94815	9.70863	9.69716	7.77148	8.43234	8.57475	8.1328
Aco1	12.0539	12.8268	13.2956	13.1241	12.6142	12.8304	12.7326	12.697
Aco2	14.5584	14.5136	14.9068	14.7728	14.112	14.9049	15.0247	14.7123
Acod1	4.21137	4.62854	4.10641	4.27873	7.84134	5.53023	5.95283	6.64384
Acot1	4.16582	3.84452	3.87395	4.33274	4.29434	5.0994	5.38565	4.61399
Acot10	6.57365	6.69445	6.83318	6.75535	7.4941	6.65167	6.84876	6.87722
Acot11	8.60189	9.0283	8.84833	8.6388	8.74766	8.62794	9.03216	8.85708
Acot12	7.69292	5.89903	7.19149	6.67366	6.65783	6.85118	6.57313	6.5441
Acot13	13.436	13.0478	13.0772	12.8643	13.272	13.0205	13.0208	12.7945
Acot2	11.5873	11.0984	10.1935	10.5763	11.3504	11.7789	11.7701	11.6451
Acot3	4.58116	4.70821	3.99655	4.58845	4.10665	4.78332	4.42276	4.57368
Acot4	6.4061	7.14827	7.56959	8.12979	6.45519	7.0574	7.46466	7.07726
Acot5	4.27257	4.11123	4.01751	4.50148	4.67175	4.76425	4.90939	4.61784
Acot6	5.03977	5.57415	5.20116	5.68681	5.45628	5.49862	5.41013	5.78591
Acot7	10.3535	10.182	10.4649	9.83538	9.69669	10.9784	11.3131	10.2782
Acot8	8.47425	8.57049	8.70145	8.70406	8.64326	9.16681	9.38334	8.87927
Acot9	9.87165	10.1454	10.1642	10.2491	10.803	10.7617	10.9217	10.5513
Acox1	13.6611	13.7416	13.9695	14.0186	12.7842	13.9037	13.8292	13.7722
Acox2	8.20829	8.09383	8.20973	9.2318	7.70516	7.8068	7.24697	7.63349
Acox3	10.2239	10.4877	10.775	10.7734	10.129	10.8005	10.5091	10.2946
Acoxl	6.39954	5.71147	5.95305	5.6933	5.44808	5.79442	5.40343	6.09399
Acp1	13.9887	14.3153	14.403	14.1049	14.4223	14.1568	14.3039	14.3335
Acp2	6.0718	6.63785	6.83551	7.00992	6.43325	6.92073	6.40595	6.11332
Acp3	8.28512	7.67659	7.82448	7.14953	7.31624	8.09848	7.87101	7.99355
Acp4	6.05425	6.03976	5.67191	5.74503	5.70373	6.22782	5.99444	6.29226
Acp5	13.8645	14.4517	14.2179	14.2813	13.9796	14.4448	14.5615	14.254
Acp6	10.9237	10.7858	11.0938	11.1948	10.7738	10.7447	10.8612	10.5655
Acp7	4.9219	5.50327	5.2576	4.58319	5.51606	4.9206	4.99783	5.31568
Acr	6.36535	5.97477	6.00885	5.94137	6.21591	6.72645	6.29125	6.44258
Acrbp	11.8254	10.2567	9.95097	9.67147	8.86522	8.39503	9.00746	8.55499
Acrv1	3.86787	3.44547	3.37245	2.91232	3.56824	3.56927	3.48905	3.88416
Acsbg1	6.23219	6.75807	6.50677	6.91597	6.71411	7.24859	6.8079	6.951
Acsbg2	5.12276	5.00417	5.10825	4.62899	5.12443	4.81166	5.0463	5.42584
Acsbg3	3.42345	3.26153	3.24269	3.2593	3.11174	2.97325	3.07712	3.09965
Acsf2	10.6351	10.5076	11.3027	11.3552	9.4597	10.3058	10.4005	9.87346
Acsf3	7.21492	6.8587	7.03121	7.05885	6.66858	7.36731	7.11841	7.14417
Acsl1	8.6342	8.85838	9.11387	9.2843	9.94669	9.77683	10.2059	9.79516
Acsl4	10.7647	10.583	10.2274	10.6323	12.5284	11.2126	11.7416	11.7537
Acsl5	15.613	16.2404	16.3742	16.5385	15.8711	16.5325	16.327	16.5082
Acsl6	4.72924	4.3552	4.76128	4.26845	4.93059	4.1091	4.57151	4.78362
Acsm1	5.09502	4.92269	4.94232	4.52826	4.96883	4.82223	4.76539	4.81564
Acsm2	4.08828	3.52829	3.50752	3.70917	3.6505	3.67795	3.69661	3.85648
Acsm3	7.86532	8.4795	9.17161	9.52415	10.4121	8.9898	9.18811	9.55156
Acsm4	5.6278	5.91707	5.71343	5.32653	5.90428	5.34968	5.72757	5.82084
Acsm5	4.52207	4.71412	5.33583	5.71627	5.75344	5.6547	5.18658	5.23727
Acss1	13.7062	13.3131	13.5007	13.4742	12.9024	13.4388	13.5651	13.2871
Acss2	9.69752	10.3999	10.4137	10.2802	10.649	10.0109	10.3898	10.2613
Acss3	4.75069	4.9579	4.96515	5.14529	5.20658	4.8513	5.06141	4.74574
Acta1	9.29458	9.20284	8.86741	7.59485	8.74821	8.46493	9.27236	8.79946
Acta2	16.373	16.5237	16.2689	16.0928	16.6867	15.9015	16.2296	16.1058
Actb	17.7597	17.8814	17.6965	17.8608	17.7926	17.8226	17.9036	17.8769
Actbl2	4.65556	3.82769	4.46803	3.96503	3.9573	3.9015	3.49507	3.89073
Actc1	5.74775	5.63002	5.71683	5.69259	5.95622	6.13648	5.19972	5.81877
Actg1	15.4094	15.7584	15.9947	15.64	16.5399	16.3289	16.3692	16.3333
Actg2	14.8524	14.6179	14.3184	13.9024	15.4901	14.0798	14.5634	14.5389
Actl10	3.859	4.13272	4.27698	3.86239	4.64299	4.2241	4.43664	4.2939
Actl11	5.41347	4.82897	4.84879	4.83293	5.19047	4.80081	4.78969	5.08337
Actl6a	12.0845	12.4049	12.378	12.1478	12.3311	12.3322	12.5771	12.5821
Actl6b	8.46464	8.84129	8.73332	8.41181	8.79739	8.51904	8.56257	8.71617
Actl7a	4.28821	4.38495	4.04575	3.98258	4.40827	4.38523	3.75307	4.16544
Actl7b	5.08709	4.6269	4.55766	4.45931	5.01092	4.72469	4.33973	4.36671
Actl9	3.6597	3.57614	3.70508	4.00258	4.00557	3.6174	3.66134	3.53726
Actmap	7.12968	6.70479	7.04575	6.984	6.14972	6.27927	6.34033	6.24184
Actn1	10.4431	9.63138	9.90498	9.37793	10.627	10.3012	10.5631	10.3286
Actn2	5.51772	5.15147	5.45466	4.98219	4.9356	5.36451	5.11381	5.70447
Actn3	6.73042	6.76958	6.93321	7.04408	6.95839	7.31455	6.90559	7.20778
Actn4	16.5259	17.1717	17.2315	17.2	16.6094	16.9388	16.8749	17.1384
Actr10	10.7699	11.964	11.8503	11.5785	12.0861	11.391	11.6097	11.5302
Actr1a	12.9136	14.011	13.978	13.7713	13.4004	14.0626	14.101	13.8372
Actr1b	11.5948	12.7673	12.8274	12.5834	12.8603	12.9459	13.1636	13.0356
Actr2	14.514	15.178	15.1882	14.9036	14.8414	14.591	14.7952	14.7644
Actr3	15.414	15.5893	15.7631	15.6084	15.4093	15.3116	15.3301	15.4893
Actr3b	3.40606	4.65469	4.54467	4.84624	4.74116	4.2444	4.28103	4.71136
Actr5	6.42544	6.80208	7.37072	6.8902	6.6567	7.08579	6.97403	7.23463
Actr6	6.3763	6.7226	6.70531	6.65159	6.48989	5.98645	6.63546	6.29627
Actr8	9.56298	10.3933	10.2938	10.4476	10.0104	9.99653	9.98107	10.1084
Actrt1	4.04727	3.83265	3.69684	4.07048	3.90738	3.88343	3.73543	3.93701
Actrt2	4.68281	5.12014	4.90138	4.68286	4.86945	5.22268	4.94498	5.05397
Actrt3	5.83291	5.98972	5.62603	5.53637	6.14837	5.47544	5.55405	5.81391
Acvr1	7.92488	8.88924	8.49556	8.57493	9.24381	8.65132	8.94555	8.8484
Acvr1b	10.8746	11.5983	12.0168	12.0657	11.7239	11.5097	11.5807	11.3229
Acvr1c	8.22457	8.85317	8.58531	8.53473	8.03851	6.73054	6.90985	7.02776
Acvr2a	11.0324	11.5803	11.732	11.216	10.5897	10.7889	10.9127	10.6654
Acvr2b	4.37503	5.1989	4.46563	4.51657	4.14923	4.22217	4.30664	4.43193
Acvrl1	8.40577	8.74464	8.58205	8.47719	8.37668	8.61618	8.93523	8.66066
Acy1	11.1641	11.3478	11.8239	11.9454	12.1589	12.7599	12.6499	12.2799
Acyp1	6.34157	6.57116	6.83547	6.56242	6.72706	6.16757	6.17635	6.65739
Acyp2	6.22513	6.27271	6.38168	5.94192	6.62534	5.74114	6.15102	5.64359
Ada	15.3642	14.9027	15.2058	14.0638	7.72157	10.4991	8.72706	9.27335
Adad1	4.23637	3.82554	4.33153	4.45595	4.35627	4.19266	3.95258	4.25045
Adad2	4.31972	4.31365	4.14595	4.12428	4.29054	4.08078	4.85179	4.24275
Adal	9.74867	10.4561	10.7506	10.7725	9.86013	9.65996	9.35086	9.99259
Adam10	13.8558	14.3149	14.4054	14.0713	13.0305	13.6818	13.7745	13.8725
Adam11	4.60695	4.4618	4.60887	5.05652	5.23405	5.25673	4.91348	4.77298
Adam12	4.69139	5.1459	4.24704	4.35561	4.74689	5.21957	4.63526	4.72354
Adam15	8.86463	7.94406	7.4997	7.73295	7.40677	7.54057	8.13053	7.68239
Adam17	11.2322	12.211	11.9878	11.7623	11.0351	11.0841	11.1164	10.8114
Adam18	3.24658	3.26702	3.18177	3.18175	3.18401	3.3231	3.26884	3.3613
Adam19	9.07436	9.07263	8.64188	8.44984	8.39588	8.00541	8.45852	8.17818
Adam1b	5.8466	5.70236	5.5775	5.51919	5.52701	5.3553	5.44988	5.43126
Adam2	2.97639	2.72589	2.77185	3.60486	3.0352	2.86462	3.4384	3.38143
Adam20	5.12855	4.95988	4.80795	5.43654	4.90728	5.24423	5.08726	4.84705
Adam21	3.53292	3.78052	3.81206	3.9413	3.66296	3.9224	3.8959	3.66177
Adam22	6.89678	6.54641	6.89512	6.3569	6.70604	6.30271	6.48928	6.65762
Adam23	5.98104	5.60031	5.31687	6.18804	5.46957	6.03233	5.80833	5.40053
Adam24	3.75709	3.53764	3.97554	3.32866	3.67188	3.83225	3.35054	4.29788
Adam25	4.8009	4.75137	4.04871	4.94579	4.47409	4.39471	4.45433	4.547
Adam26a	4.02053	3.93395	3.79768	3.73291	3.98397	4.3929	4.02814	3.99389
Adam26b	3.21947	3.1954	3.50689	3.25197	3.60571	3.35044	3.60473	3.3118
Adam28	4.16362	4.13631	4.13042	3.62644	4.08741	3.78545	3.84898	4.32953
Adam29	4.88843	3.61948	3.86461	4.31448	3.45092	3.53849	4.13863	3.63414
Adam3	4.79335	5.44816	5.43889	5.79622	5.87271	4.9454	6.14855	5.50786
Adam30	4.23853	4.72831	3.98479	4.16042	4.33162	4.27283	3.91092	4.06328
Adam32	4.5733	4.11494	4.34135	4.16716	3.96533	4.84577	4.11052	4.30444
Adam33	5.33719	5.3556	5.49446	5.11252	5.46943	5.10803	5.24699	5.27322
Adam34l	4.85493	4.32651	4.47203	4.26373	4.87991	4.71282	4.53489	4.90225
Adam39	3.39281	3.12636	3.47319	3.28261	2.95268	2.99311	3.45579	3.1579
Adam4	8.29521	8.57908	8.28851	8.54042	7.19242	6.4766	7.08598	6.93384
Adam5	4.96722	4.48008	4.83502	4.34931	3.99736	4.458	4.78978	4.307
Adam6a	4.32063	4.23989	4.31178	4.48066	4.65117	4.43017	4.35558	4.58967
Adam6b	4.49942	4.08113	3.52802	3.56677	3.75334	3.46557	4.20237	4.1031
Adam7	3.80828	3.74144	3.666	3.92367	3.88979	3.98813	3.66641	3.79988
Adam8	4.23308	5.05256	4.9147	5.09607	6.94285	6.47152	6.79237	6.44806
Adam9	10.3378	10.9707	10.7758	11.1035	11.5685	11.2288	11.6052	11.5714
Adamdec1	14.0338	15.0492	14.8796	15.3827	15.7373	14.8803	15.0389	15.2925
Adamts1	6.63793	6.66728	6.74336	6.74091	12.5327	11.2866	11.6986	11.8882
Adamts10	7.82876	8.62894	7.87944	8.71372	7.10854	7.23663	6.93344	7.38552
Adamts12	6.17645	6.87647	6.34627	6.2246	6.50404	6.84004	6.68589	6.6437
Adamts13	4.50979	3.68384	3.57044	3.75564	3.88678	3.43188	3.39732	3.69076
Adamts14	6.17023	5.78721	5.678	5.49918	6.03164	6.20078	5.99508	6.10094
Adamts15	5.41274	5.96534	6.29762	6.15893	5.59925	6.05389	5.83552	6.12443
Adamts16	5.19112	5.44022	4.98207	4.85428	5.05392	4.97991	4.7606	4.9803
Adamts17	6.53123	7.10891	6.77859	6.4752	6.43643	6.45432	6.40499	6.56591
Adamts18	5.70896	5.54998	5.81733	4.95206	5.13283	4.90535	4.88595	5.00043
Adamts19	6.48319	6.57996	6.42332	6.27498	6.66295	6.2126	6.40049	6.3008
Adamts2	6.77771	6.67672	6.54191	6.16925	6.13081	6.59495	6.86536	6.58281
Adamts20	5.33324	4.83746	4.94739	5.30965	5.04868	5.08862	4.89406	5.03925
Adamts3	4.39224	4.42618	4.09043	4.71593	5.81878	5.39105	5.3038	5.46143
Adamts4	4.50729	4.81759	4.29939	3.59223	12.1115	10.4678	11.2856	11.0574
Adamts5	3.42948	4.02866	3.91175	3.6949	4.2155	3.6338	4.53081	3.99676
Adamts6	7.23607	7.55273	7.3367	7.68658	5.98446	6.41667	6.00014	5.97914
Adamts7	6.69536	6.93274	6.63036	6.49779	6.82986	6.63981	6.76149	6.95423
Adamts8	3.90505	3.8674	4.16849	3.90469	4.60987	4.59063	4.77159	4.58605
Adamts9	8.37363	8.86179	8.32478	8.21751	12.3791	10.518	11.1683	11.6612
Adamtsl1	6.61632	7.03875	6.82015	6.71427	7.33054	6.67201	6.76232	6.68224
Adamtsl2	5.13355	4.86934	4.76758	4.97784	5.166	5.10192	5.33928	5.52344
Adamtsl3	8.7397	9.05671	8.8106	8.18346	9.28501	7.66349	7.79761	8.57239
Adamtsl4	9.49908	9.14509	8.98574	8.94869	9.20837	9.35661	9.5063	9.38936
Adamtsl5	11.7903	10.768	10.5885	11.3661	9.45359	10.5499	10.1628	9.70767
Adap1	9.79266	10.2395	10.5512	10.7483	10.1181	10.943	10.6651	10.47
Adap2	11.0453	11.4487	11.3796	11.8535	11.063	11.6721	11.5407	11.4925
Adar	10.9797	11.9754	11.7043	12.0166	10.8914	11.2375	11.2248	11.0619
Adarb1	9.64407	8.28634	8.4957	8.64707	9.05282	9.01707	9.30728	9.30525
Adarb2	5.21142	5.37812	5.50343	5.43026	6.05354	5.33106	5.23694	5.38712
Adat1	7.29816	6.85049	6.33348	6.83378	5.38407	5.24679	5.87993	5.2739
Adat2	8.00555	8.07513	7.927	7.49159	8.70506	9.00229	9.02983	8.55393
Adat3	10.2451	10.3707	10.3449	9.75416	9.79353	11.2575	11.5747	10.115
Adck1	6.99472	7.2721	7.41087	7.06584	6.57361	6.44442	6.59933	6.34952
Adck2	6.69571	6.59969	6.51852	6.42467	5.70959	5.99299	5.79197	6.28187
Adck5	11.2168	11.8738	11.6924	11.3641	10.8612	11.1214	11.2012	10.9668
Adcy1	5.87861	6.11416	6.19126	6.14039	6.18255	5.91901	6.04396	5.99088
Adcy10	3.64091	3.65237	4.2675	3.49317	4.38997	4.2636	3.47806	4.07063
Adcy2	5.42486	5.90275	5.45514	5.62383	6.07035	5.83011	6.16481	6.01702
Adcy3	5.721	5.80995	5.99794	6.60279	5.72694	6.05996	5.76708	6.26637
Adcy4	5.14304	4.73004	4.80689	4.69435	6.08953	5.66612	6.15734	5.58793
Adcy5	6.13979	6.68814	7.06141	6.91456	7.35997	6.82637	6.80878	6.78999
Adcy6	11.4254	12.1426	12.3538	11.9865	11.5084	11.2304	11.3927	11.6651
Adcy7	7.6316	8.94114	8.34746	8.9041	7.39444	7.47935	7.6453	7.99025
Adcy8	9.75323	9.86958	9.82077	10.0054	8.59386	9.39718	8.77861	8.97284
Adcy9	8.00568	8.6617	8.8128	8.60287	8.07743	8.25003	8.50705	8.19291
Adcyap1	4.5114	4.39635	4.21871	4.33188	4.51143	4.50097	3.95676	4.5627
Adcyap1r1	6.70579	7.57946	7.53223	7.23977	7.88403	6.58763	7.55963	7.34107
Add1	14.2061	14.4662	14.4838	14.6953	13.9766	14.1537	14.405	14.0696
Add2	3.36797	3.7668	3.42764	3.94702	3.74181	3.58824	3.76097	3.85783
Add3	12.6474	13.4707	13.606	13.7672	13.4657	13.2835	13.0571	13.4221
Adgb	4.36458	5.12653	4.75791	4.70936	5.35145	4.90185	4.83971	4.82286
Adgra1	4.36497	4.20307	3.93915	4.15624	3.89245	3.99912	3.79678	4.56211
Adgra2	10.2915	10.5088	10.3929	10.3475	10.6403	10.1136	10.4411	10.553
Adgra3	9.74508	10.6136	10.6395	10.2398	9.82735	10.2903	10.1626	10.2608
Adgrb1	5.96881	5.94666	5.60536	5.28451	6.04893	5.5131	5.85642	6.21858
Adgrb2	4.87819	4.92215	4.66756	4.76909	4.67544	4.41401	4.53258	4.27252
Adgrb3	4.28318	5.07104	5.50506	5.09086	5.51389	4.4939	4.59127	5.17284
Adgrd1	11.9565	12.1448	12.1589	12.1596	12.5469	11.5744	11.6212	11.7723
Adgre1	8.23125	8.25208	8.53918	7.88448	8.21204	7.68867	8.18084	7.86335
Adgre4	6.87535	6.60677	5.98301	6.22708	6.36356	6.30954	6.39093	5.92372
Adgre5	10.9975	11.0328	10.804	11.1134	11.301	10.9985	11.4598	10.9098
Adgrf1	5.69186	5.76295	5.64606	5.50856	5.46495	6.15297	5.83967	5.70178
Adgrf2	6.13764	5.07384	4.81381	5.26172	5.49367	5.21376	5.2639	5.47179
Adgrf3	5.24541	5.31728	5.10599	5.80099	5.67929	5.81951	5.48787	5.89086
Adgrf4	5.12093	4.8289	5.1891	4.61918	5.03525	4.51828	4.77136	5.05007
Adgrf5	10.3838	10.7061	10.348	10.7497	11.8521	11.4709	11.4459	11.6116
Adgrg1	9.79176	9.25867	9.08409	8.73596	10.8542	10.4366	10.4991	10.2919
Adgrg2	4.84089	5.37276	5.20923	5.18504	6.60951	5.00584	5.51663	5.84549
Adgrg3	5.69117	5.55869	6.41381	5.21665	7.1163	6.30426	6.28112	6.06506
Adgrg5	6.63303	6.52026	6.89126	6.39353	6.01171	7.39258	6.98695	6.46585
Adgrg6	8.59364	9.02196	8.98318	8.80183	8.91101	8.60727	9.2926	8.73682
Adgrg7	16.2229	16.6176	16.4033	16.0485	16.0735	16.1333	16.0667	16.229
Adgrl1	7.18585	7.4122	7.3361	7.79186	8.00279	7.1925	7.55427	7.62423
Adgrl2	8.29274	8.20742	8.12805	8.00423	8.85805	8.97531	9.13967	8.57044
Adgrl3	7.15127	6.97127	6.9222	7.14516	7.19266	6.97352	6.9876	7.1743
Adgrl4	11.2446	10.7999	10.4795	10.7424	11.9722	11.6639	11.8673	11.7452
Adgrv1	3.14184	3.29474	3.35918	3.35398	3.34111	3.22766	3.13443	3.48414
Adh1	8.85963	10.0123	10.4183	11.0198	11.0347	10.9061	10.5981	10.6773
Adh4	3.7962	3.94312	4.30954	4.04024	4.12833	4.34639	4.44844	4.1608
Adh5	6.19521	6.97166	7.04388	6.85381	6.86461	6.96294	7.26577	6.64965
Adh6-ps1	4.65609	4.65457	4.36329	4.53418	4.28448	4.51208	5.05942	4.79647
Adh6a	9.95673	9.47833	11.085	8.46618	9.40675	12.5976	11.1697	11.6569
Adh7	4.67378	4.05375	4.20258	4.68855	4.24917	4.87494	3.9544	4.13647
Adhfe1	6.59031	7.60537	8.0166	7.48442	8.83994	7.22729	8.3855	8.24735
Adi1	10.6439	10.6817	10.6382	10.6272	10.4825	10.7138	10.7729	10.8992
Adig	5.02311	5.37317	5.07131	4.69094	5.21155	5.71496	5.50638	5.19098
Adipoq	3.63686	10.6741	9.97538	10.2153	11.3486	7.72314	12.5113	11.4383
Adipor1	13.5859	14.069	14.1389	13.8894	14.1192	13.9544	13.8704	14.188
Adipor2	14.1904	13.4768	13.8232	13.2951	13.3393	13.7232	13.5468	13.3738
Adissp	7.89603	8.30851	7.92457	7.63269	8.01195	8.03215	8.33499	8.28601
Adk	12.7817	13.6269	13.3835	13.6454	13.5234	12.91	13.029	13.1394
Adm	9.40082	10.0266	9.45018	8.59954	13.7934	11.7696	11.5713	12.4168
Adm2	5.43906	4.99967	4.83139	5.28785	5.41911	4.96378	5.42713	5.307
Adnp	11.0143	10.9995	11.2913	11.0642	11.4088	11.0087	11.1323	11.0279
Adnp2	7.47662	8.17095	8.11851	7.66868	7.89514	7.26923	7.61566	7.43681
Ado	6.62962	7.27307	7.28955	7.2442	6.75521	7.00118	7.46889	7.30972
Adora1	6.6132	6.24845	6.08297	5.9477	6.47275	6.51565	6.19057	6.85872
Adora2a	7.83903	7.78184	8.1636	7.86214	8.35011	7.86262	8.27638	8.12082
Adora2b	4.70784	4.52823	4.71959	4.40551	5.06578	4.67658	4.92885	4.81848
Adpgk	8.11564	8.56793	8.41104	8.58492	8.7586	8.38077	8.31049	8.25206
Adprh	5.88215	6.56031	6.10409	6.47694	6.35341	6.79064	7.25906	6.22374
Adprhl1	4.75801	4.89112	4.04105	3.98863	4.59661	4.45867	4.37229	4.74047
Adprm	11.9453	11.8668	11.8423	11.6126	12.1004	11.7975	11.3645	11.5507
Adprs	5.34931	6.11118	6.11029	5.76342	6.00288	5.7654	6.08401	6.3742
Adra1a	3.55594	3.51051	3.4907	3.44811	3.49361	3.64762	3.19089	3.70919
Adra1b	5.01781	5.01135	4.79571	4.7382	4.94597	4.62676	4.65236	4.94754
Adra1d	4.47431	4.23729	4.31513	4.53401	4.33665	4.21821	4.49372	4.34666
Adra2a	7.7971	8.03981	7.40429	6.99409	7.25753	7.09254	7.16609	7.16232
Adra2b	4.59094	4.46686	4.0789	4.48478	4.19662	4.24606	4.53053	4.58517
Adra2c	3.47666	3.518	3.60958	3.59021	3.60803	3.43948	3.44262	3.60029
Adrb1	3.76097	3.66869	4.28719	3.63816	3.88495	3.7335	3.79206	3.46808
Adrb2	8.27861	8.29961	8.10535	8.94354	10.3146	9.00985	9.45067	9.46683
Adrb3	4.78093	5.68493	5.24468	5.54171	5.62643	4.99269	5.81151	5.5214
Adrm1	10.5736	10.0365	10.3638	10.1999	10.3394	11.0927	11.2685	10.6239
Adsl	8.85882	9.51298	9.39559	9.24428	8.91537	9.4304	9.9099	9.32663
Adss1	4.51421	4.54844	4.78195	4.92256	4.42094	4.58718	4.67351	4.59602
Adss2	13.1335	13.6527	13.5761	13.5892	14.4369	13.8164	13.9128	14.008
Adtrp	14.9572	14.7648	14.7103	14.9358	14.6528	15.1877	14.9793	14.8752
Aebp1	9.12275	9.20363	9.46419	9.64405	9.64311	8.52145	9.36311	9.05377
Aebp2	13.5578	13.6928	13.715	13.8076	14.1858	13.7804	13.796	13.825
Aen	7.16935	7.48066	7.13242	7.41813	7.97188	7.38292	7.41295	7.73113
Afap1	8.46331	8.40908	8.75749	8.05082	9.14814	8.74221	8.58812	8.42421
Afap1l1	6.22064	6.26346	5.959	6.30765	6.63581	6.2587	6.43401	5.89213
Afap1l2	7.33628	6.55522	6.52395	6.59135	6.64835	6.4168	6.69206	6.78154
Afdn	12.2706	11.5031	11.5687	11.277	11.194	11.3694	11.4862	11.3687
Aff1	14.7538	13.7896	13.9676	14.1202	14.5213	14.5214	14.6188	14.4887
Aff2	4.95001	4.65257	4.90511	4.63625	4.5044	4.23687	4.37568	5.03654
Aff4	14.9207	14.9091	14.8276	14.9713	15.3789	14.9821	14.9878	15.2603
Afg1l	7.70906	8.9947	8.88915	8.66923	7.85321	7.7718	7.89068	7.77489
Afg2a	9.38685	10.1602	10.0756	9.84362	10.0406	9.89507	10.0392	9.89931
Afg2b	6.22016	6.66668	6.88046	6.16751	6.8123	6.61453	6.60105	6.62459
Afg3l1	7.84669	8.69947	8.78923	8.21133	8.5073	8.58839	8.91888	8.61267
Afg3l2	12.5795	13.2024	13.4877	13.5085	13.1841	13.3784	13.3687	13.3744
Afm	4.50116	4.17868	4.17131	4.56768	4.63065	4.60649	4.35385	4.3305
Afmid	7.23956	7.37463	7.61034	7.85043	7.7547	8.16659	8.12632	7.75915
Afp	5.93872	5.26293	5.24367	4.97574	5.29632	5.36855	5.23647	5.67758
Aftph	12.1139	12.5524	12.6338	12.7387	12.1982	12.3509	12.3349	12.3419
Aga	8.53403	8.77687	9.0832	8.86396	9.14009	8.84162	8.88531	9.08253
Agap1	11.5078	11.8161	11.8945	11.8721	11.6196	11.6884	11.6494	12.0285
Agap2	5.2711	5.67167	5.67376	6.32922	5.10583	5.96897	5.41018	5.69019
Agap3	7.95392	6.99134	7.13273	7.18337	7.16738	7.20806	7.1765	7.26159
Agbl1	5.5042	4.99879	4.99993	5.3027	4.97062	5.05037	5.29108	5.31806
Agbl2	5.09643	5.56301	4.94012	4.942	5.17266	5.13761	5.01324	5.38703
Agbl3	6.20427	6.22203	5.69162	6.47302	6.55619	6.22867	6.06175	6.47159
Agbl4	3.76732	3.69602	3.72791	3.70006	4.06214	3.70655	3.40934	3.78969
Agbl5	8.45371	8.33428	8.27451	8.05185	7.84768	8.22937	8.00374	8.0234
Ager	4.93476	4.99904	5.04986	4.42598	5.04761	4.65486	4.70975	4.75728
Agfg1	13.0388	13.735	13.6677	13.7981	13.7599	13.9012	13.8517	13.9194
Agfg2	8.49309	8.68655	8.73118	8.74076	8.6192	9.07046	9.13983	8.85165
Aggf1	11.8683	11.8957	12.3224	11.9316	11.8534	11.8906	12.1258	11.9103
Agk	7.88103	7.71961	7.87554	7.84888	7.99387	7.89271	8.30811	7.94722
Agl	9.83008	10.2152	10.8193	10.4799	9.91533	9.81789	10.1465	10.0161
Agmat	5.89706	5.85593	6.14248	5.84114	5.70167	6.17925	6.39497	6.11441
Agmo	13.5958	13.9345	14.2805	14.2311	13.2368	13.795	13.1226	13.3434
Ago1	8.85757	9.0454	8.90165	9.12633	8.54009	8.37038	8.59287	8.25711
Ago2	12.1013	12.5345	12.6473	12.5293	12.4499	12.4008	12.585	12.6675
Ago3	8.87762	9.63498	9.70993	9.68707	9.07529	9.19878	9.4576	9.39941
Ago4	7.12137	7.25231	7.13027	8.02736	6.81597	7.09694	7.15858	7.39978
Agpat1	14.3499	14.6129	14.6937	14.9466	13.7219	14.61	14.2736	14.3347
Agpat2	15.6323	15.432	15.2827	15.1323	15.7698	16.1157	16.0088	15.756
Agpat3	11.8799	13.1612	13.2569	13.2982	13.5795	13.3166	13.2885	13.4049
Agpat4	10.6428	11.2154	10.9431	10.373	11.7817	11.8628	11.9534	11.9021
Agpat5	10.1546	10.0679	9.97975	9.81293	10.2032	9.65504	10.201	9.7637
Agps	11.369	11.3057	11.5755	11.2162	11.6592	12.066	12.0039	11.8984
Agr2	15.4105	15.0608	15.0323	14.9009	15.053	14.927	15.2099	15.1456
Agr3	5.25143	4.9749	5.62982	5.35801	5.65849	5.11523	5.45442	5.64835
Agrn	11.423	10.5112	10.6089	10.7976	9.68036	9.68282	9.4004	9.85656
Agrp	6.47339	6.40489	5.91117	6.16153	6.27378	6.38849	6.55549	6.44283
Agt	8.67981	9.08798	8.50517	8.64438	9.84619	9.21699	9.04829	9.33538
Agtpbp1	7.60946	8.18905	8.29364	8.58647	8.62488	7.68924	8.11686	7.88726
Agtr1a	9.43197	9.1268	8.79617	9.1936	9.36599	8.66659	8.88209	9.07651
Agtr1b	4.99298	4.99608	4.85308	5.11044	5.47988	5.23277	5.4358	5.80738
Agtr2	5.7518	4.7211	4.98508	5.2787	4.61402	5.17782	5.06844	5.45098
Agtrap	7.98176	8.02287	8.10699	7.85988	7.65824	8.16587	8.60421	8.19797
Agxt	4.6981	4.14999	4.00656	4.47929	4.4638	4.39222	4.56691	4.36585
Agxt2	5.48961	5.15004	5.50755	5.30455	5.1814	4.92048	5.19383	5.78413
Ahctf1	9.43992	9.66228	9.54014	9.66224	9.78185	9.49291	9.98012	9.51536
Ahcy	11.8985	11.944	12.2497	11.9815	12.4565	12.1656	12.2866	12.3154
Ahcyl1	15.6377	15.3291	15.3962	15.3555	15.7182	15.3521	15.4358	15.5538
Ahcyl2	11.4612	12.5302	12.689	12.0906	11.7801	12.5912	12.3345	12.3227
Ahdc1	5.2388	5.27955	5.40065	5.3605	5.26872	4.9378	5.16993	4.93299
Ahi1	6.00905	6.11874	5.98888	6.2994	6.49741	5.82731	6.29356	6.19719
Ahnak	11.4121	12.7972	13.1929	13.0042	13.7946	13.2812	13.699	13.7018
Ahr	7.19525	7.61928	7.64432	7.81027	7.69847	8.04657	7.72296	7.32257
Ahrr	6.44883	6.71805	6.89193	6.73352	6.13766	6.41297	6.41251	6.94665
Ahsa1	11.3638	12.0802	12.1168	11.6896	11.2113	11.719	11.7407	11.4807
Ahsa2	9.00413	9.15034	9.79999	9.19855	9.0578	9.01615	9.3214	8.92882
Ahsg	4.83189	4.44008	4.24365	4.35334	3.97024	4.60021	4.10163	3.84541
Ahsp	4.73461	4.98841	4.77698	4.90579	4.77895	4.55869	4.54471	4.88135
AI182371	5.56576	4.90249	5.03934	5.15717	4.8854	5.14379	4.72056	4.6818
AI429214	5.34578	5.14773	4.67945	4.79812	4.62337	4.95678	4.53984	4.70812
AI467606	6.70814	6.20881	6.13185	6.51717	5.65702	5.6566	6.29014	6.13357
AI504432	6.01964	6.11124	6.61766	7.03004	5.88769	6.19974	6.11969	5.35242
AI506816	12.1587	11.8563	12.0861	11.4466	12.1155	12.7471	13.0057	12.2826
AI593442	7.43393	6.19731	6.39598	6.22971	6.56528	6.595	6.43917	6.34648
AI597479	7.47109	8.17809	7.96121	7.58784	7.61407	7.00998	7.45945	7.22211
AI661453	8.7566	8.10264	8.26788	7.86504	8.35789	9.13586	8.47256	8.87594
AI837181	8.264	9.24089	8.8773	8.90207	9.43337	9.60541	9.59939	9.03749
AI987944	10.9788	11.1301	11.1062	11.2765	10.0743	9.13054	9.68715	9.36613
Aicda	3.67187	6.33635	4.14317	7.88221	4.00755	4.03859	3.61904	3.60391
Aida	11.695	11.3161	11.315	11.5877	11.8802	11.6429	11.7252	11.4243
Aif1	9.09003	9.42215	9.25792	9.52739	9.28034	9.05473	9.17482	8.93882
Aif1l	7.20623	7.36234	7.25516	7.00664	7.67471	7.30498	7.19587	7.6109
Aifm1	13.486	13.6302	13.6744	13.56	13.533	12.9821	13.1589	13.3261
Aifm2	4.67719	5.46911	5.85947	6.01211	6.19949	5.85023	6.12191	5.99554
Aifm3	4.49055	4.60917	4.55596	4.39037	4.62419	4.43719	4.65483	4.23489
Aig1	10.4613	10.585	10.6955	10.3617	10.7306	10.6505	10.5701	10.7503
Aim2	8.9576	9.07747	8.93997	8.73879	8.97426	8.78355	9.24376	8.85997
Aimp1	8.48078	8.20582	8.46967	8.78766	9.53859	9.23353	9.25905	9.07388
Aimp2	10.9487	10.594	10.7223	10.7252	10.5759	10.9919	10.9185	10.5083
Aip	5.54634	6.33633	6.62385	6.17175	5.47298	5.92556	6.04115	5.98942
Aipl1	2.88001	2.96303	2.88691	3.15021	3.05485	3.01919	3.04561	2.85844
Aire	3.86742	3.80788	4.00412	3.52428	4.13097	3.71035	3.38393	4.20652
Airim	5.90942	5.99316	5.87261	6.22421	5.68159	5.70848	5.83243	6.19207
Ajap1	4.2537	3.69456	3.94767	3.83881	4.31704	3.97864	4.18384	4.00419
Ajm1	3.24935	3.14606	3.56011	3.10665	3.17801	3.23236	3.13081	3.34336
Ajuba	6.30445	6.24991	6.31478	6.47375	5.6414	5.40228	5.44905	5.75328
Ak1	7.23543	7.21424	7.16399	7.33032	7.2817	6.65598	7.09202	6.62795
Ak2	13.2492	13.9824	14.3142	13.8074	14.4127	14.2403	14.3401	14.3812
Ak3	14.6969	14.7524	14.8645	14.7406	14.3658	14.5952	14.541	14.509
Ak4	7.08864	6.89391	6.95432	6.08776	6.89491	5.77687	5.72411	6.40578
Ak5	4.81254	4.5311	4.52686	4.71245	4.68896	4.56921	4.63209	4.183
Ak7	5.83951	5.21831	5.22361	5.08918	5.94592	5.53576	5.95252	5.54254
Ak8	5.76161	5.60858	5.66503	5.0677	5.85024	5.62089	5.95216	5.34282
Akain1	4.08055	3.51728	3.75748	3.75092	4.16944	3.6684	3.9872	3.82532
Akap1	9.69271	10.3682	10.551	10.2144	9.11869	9.77891	9.71913	9.48508
Akap10	9.85923	10.1307	9.90002	10.1817	9.09598	9.59761	9.86808	9.52196
Akap11	10.7894	11.0835	11.0489	11.0086	11.5639	11.043	11.3451	11.5593
Akap12	8.55765	8.78395	8.72719	8.77986	12.8606	11.2984	11.7781	11.977
Akap13	10.9154	11.3553	11.5822	11.1139	11.5983	11.1301	11.2389	11.7022
Akap14	4.36146	4.63772	5.13844	4.07241	4.35778	4.518	4.59586	4.42947
Akap17b	7.69707	7.68606	7.73617	7.565	7.09002	6.95899	7.39443	6.76332
Akap3	4.08475	3.37613	3.35888	3.68214	3.50138	3.36483	3.86495	3.90868
Akap4	3.67026	3.77269	3.62096	3.87553	3.54183	3.41922	3.65073	3.87824
Akap5	5.45906	5.52283	5.35669	5.95137	5.48688	5.29316	5.61982	5.29316
Akap6	7.34239	7.84195	7.52547	7.12874	7.38973	7.30285	6.65449	7.04817
Akap7	11.735	11.9592	12.0334	12.0036	12.5615	11.4577	11.6691	12.0067
Akap8	9.68597	10.6457	10.8207	10.9687	10.1441	10.3751	10.4962	10.1512
Akap8l	8.63213	9.66117	9.70469	10.0411	9.6871	9.3569	9.69025	9.31072
Akap9	13.7311	13.6366	13.614	13.4348	13.3409	13.121	13.2782	13.0755
Akip1	7.42509	7.68783	7.80509	7.59361	8.24115	8.02665	8.03562	7.80742
Akirin1	10.5923	11.2359	11.406	11.4094	12.0214	11.8819	11.638	11.8324
Akirin2	12.5712	12.9143	12.8207	12.5203	12.6469	12.5586	12.5982	12.5287
Akna	7.5129	8.26117	7.81991	9.30689	7.19989	8.38721	8.18004	8.04307
Aknad1	5.04812	4.92886	5.53217	4.37515	5.47276	4.18614	5.19874	4.70042
Akp3	5.66943	5.54925	5.86103	5.9439	5.72023	5.49934	5.36092	5.52048
Akr1a1	13.9783	14.1888	14.3303	14.3338	14.411	14.8146	14.766	14.5589
Akr1b1	9.54004	10.0453	10.0824	10.3753	10.5588	10.329	10.569	10.5135
Akr1b10	8.61996	9.59666	9.14081	9.08622	9.19698	9.61931	9.22712	9.28184
Akr1b7	12.2532	12.2486	12.6036	12.5503	11.2394	13.0398	12.4139	12.5183
Akr1b8	9.18965	8.36703	8.28502	8.0948	11.1395	11.2217	11.6656	11.1578
Akr1c12	11.1889	11.5225	11.6735	12.529	12.0276	11.604	11.7193	11.7828
Akr1c13	11.1846	11.7977	12.0665	12.7094	12.4215	11.9031	12.3342	12.2745
Akr1c14	11.2783	11.3031	12.2479	13.4971	11.8309	10.8183	11.3009	11.2537
Akr1c18	4.56828	4.02709	4.48505	4.09493	4.35563	3.9848	3.74264	4.33673
Akr1c19	9.58883	9.12377	9.59624	11.0803	8.95067	8.49415	8.63051	8.63796
Akr1c20	2.99446	2.9419	2.98594	3.11119	3.134	3.10967	3.39223	3.51086
Akr1c21	4.62419	4.72327	4.70523	5.38429	5.35092	3.9965	4.54155	4.72944
Akr1c6	3.48934	3.53034	3.33411	3.69002	3.76135	3.62262	3.8234	3.50704
Akr1cl	3.84965	3.63521	3.3509	3.25269	3.50858	3.21984	3.35588	3.39136
Akr1d1	4.21341	4.23119	3.30007	3.48655	4.63287	3.87513	4.04312	2.9976
Akr1e1	11.3	11.6354	11.4182	11.7563	11.4999	10.9658	10.9628	11.0043
Akr7a5	9.39554	9.52879	9.67464	9.59809	10.0518	10.0865	9.7483	10.061
Akt1	11.9175	12.3891	12.3803	12.2238	12.5562	13.1595	13.1739	13.0236
Akt1s1	11.7805	12.0082	11.6935	11.589	11.7851	11.5148	11.6669	11.7828
Akt2	8.05483	8.62308	8.6756	8.50273	9.03486	9.23054	9.59107	8.96194
Akt3	9.77055	10.1771	10.1385	10.4636	10.1692	9.77727	9.66181	9.65571
Aktip	10.1647	10.4782	10.9015	10.914	10.2616	10.2487	10.4668	10.4455
Alad	9.73563	10.273	10.493	10.1467	10.0828	10.1199	10.4633	9.91754
Alas1	14.5259	14.3818	14.6715	14.0703	14.535	13.8817	14.099	14.1276
Alas2	5.29906	5.32569	5.7877	5.03167	7.75019	7.78069	6.22452	6.95597
Alb	5.35851	5.32853	4.85969	5.2491	6.28274	5.64529	5.59856	5.53849
Albfm1	6.69149	6.48707	5.93674	5.70483	6.24375	5.78924	6.38386	6.42815
Alcam	13.1376	13.1245	13.0293	12.4614	13.2182	13.0205	13.2708	13.1101
Aldh16a1	7.39305	8.07897	8.39603	7.7837	7.85177	8.22236	8.15809	8.13862
Aldh18a1	11.1785	11.3038	11.7262	11.2804	10.9278	11.9556	11.4981	10.9642
Aldh1a1	13.3336	14.2309	13.9908	15.1679	13.4971	12.9563	13.4846	13.2797
Aldh1a2	7.81923	7.87227	7.7113	7.16172	8.50089	7.93212	7.39569	7.62055
Aldh1a3	7.04221	7.53461	7.72804	8.12572	9.37628	9.06467	9.21312	9.18385
Aldh1a7	9.34405	9.92758	9.85296	10.6402	9.48041	9.00975	9.22654	9.09858
Aldh1b1	13.0363	13.2203	13.706	13.7726	13.6864	14.2632	14.1829	13.6748
Aldh1l1	11.5781	11.6861	11.9702	11.3601	10.2885	11.625	11.3784	11.24
Aldh1l2	4.9083	4.70118	4.80271	4.60701	4.77148	4.78607	4.88108	4.69032
Aldh2	12.6786	13.7177	13.862	13.8502	13.9449	14.0463	14.1493	14.0047
Aldh3a1	3.12289	3.11057	3.00832	3.22845	3.35546	2.95699	3.15124	3.23938
Aldh3a2	12.836	13.5368	13.6077	13.637	13.6395	13.7385	13.7045	13.5805
Aldh3b1	9.77203	9.52394	9.99659	9.60281	8.67925	9.42975	9.29074	9.17453
Aldh3b2	6.1512	5.73322	5.66566	5.52849	5.96033	5.77068	6.15367	5.56274
Aldh3b3	4.78933	5.38233	5.41304	4.62123	5.05423	5.46144	5.12107	5.54327
Aldh4a1	7.94179	7.77218	9.31534	8.89137	6.62589	8.95506	8.42537	8.18816
Aldh5a1	7.92783	8.38477	8.56645	8.22201	8.489	8.67811	8.70298	8.36425
Aldh6a1	7.82645	9.32139	9.35793	9.52871	9.79079	9.68335	9.71117	9.58349
Aldh7a1	7.72485	8.50992	8.23327	8.09189	8.35772	8.35963	8.73817	8.24289
Aldh8a1	3.77388	3.48234	3.08377	3.34951	3.18278	3.53135	3.31663	3.19397
Aldh9a1	14.0439	14.9367	15.0974	15.0437	14.6518	15.0357	14.9776	14.8575
Aldoa	14.5294	15.4152	15.2714	15.1246	15.1423	15.2008	15.3218	15.3417
Aldoart1	5.42101	5.78536	5.5403	5.43143	5.92813	5.70777	5.72049	6.0437
Aldoart2	6.41967	6.72998	6.84485	6.5416	6.56448	7.01953	7.03087	6.94169
Aldob	17.2146	17.0972	17.1844	17.2543	17.2429	17.1221	16.9856	17.0907
Aldoc	7.17224	7.96733	8.14672	7.83085	7.8489	8.06721	8.07807	7.93706
Alg1	6.45899	6.60875	6.87876	6.66117	6.36608	6.73357	6.60284	6.73756
Alg10b	10.7263	11.1821	11.2317	10.912	10.8514	10.5015	10.8324	10.8051
Alg11	9.10844	9.44063	9.64216	9.2652	9.06384	8.92433	8.8854	9.18357
Alg12	9.83689	9.15039	8.63153	9.09231	8.48695	9.54954	9.46579	8.66984
Alg13	6.62715	6.55132	6.60213	6.36535	6.53423	7.12009	6.96232	6.75597
Alg14	9.695	9.31049	9.24361	8.86527	9.4825	9.3115	9.55286	9.01072
Alg2	9.50944	10.0653	10.7365	10.4339	9.53656	10.1169	10.3534	9.97106
Alg3	9.65639	8.86633	8.66264	8.00539	8.37774	9.07645	9.1118	8.66287
Alg5	11.5196	12.0231	11.9955	11.8523	12.379	12.1744	12.1614	12.0132
Alg6	10.0289	9.56017	9.743	9.37501	9.39242	9.84183	9.95853	9.77817
Alg8	8.70789	8.79378	8.351	8.35614	8.11464	8.48126	8.54285	7.98317
Alg9	9.28577	9.76745	9.98293	9.49269	9.3796	9.98993	10.0263	9.83646
Alk	4.22503	4.20191	4.3941	4.20601	4.19966	4.40237	4.20651	3.95311
Alkal1	4.42492	4.00111	3.64318	3.66926	3.87043	3.70298	3.35207	4.36505
Alkal2	3.52729	3.47277	3.18247	3.62849	3.48514	3.26343	3.71535	3.38895
Alkbh1	6.73102	6.17303	6.31295	6.29382	6.03816	6.55239	6.30527	6.42965
Alkbh2	7.44921	7.2504	6.95515	6.55983	7.00951	7.04074	6.80385	6.92933
Alkbh3	9.58234	10.1647	10.3538	10.0869	10.1079	10.4298	10.6518	10.4127
Alkbh4	7.23626	7.61657	7.60105	7.16463	7.57985	7.89558	7.60817	7.85655
Alkbh5	10.2692	11.4136	11.7623	11.4797	10.6971	11.6583	11.4325	11.2318
Alkbh6	11.0713	11.2228	11.2701	11.2934	11.2905	11.4423	11.1486	10.9002
Alkbh7	8.10107	8.15999	8.84918	8.47269	8.08194	8.29328	8.06865	8.10242
Alkbh8	10.881	10.9631	11.1806	10.9759	10.7867	10.829	10.8032	10.5876
Allc	3.49212	3.16838	3.21745	3.18057	3.33117	3.13433	3.14968	3.18322
Alms1	9.33346	9.46071	9.68977	9.23032	8.85785	8.99792	8.97211	8.99932
Alms1-ps2	5.24416	5.60656	5.86201	5.71616	5.95611	5.37084	6.03263	5.6616
Alox12	5.28344	4.87855	4.76941	4.76287	4.7843	4.63765	4.68531	4.5818
Alox12b	6.00092	6.26692	5.38817	5.21343	5.75306	5.46034	5.51694	5.92666
Alox12e	4.75422	4.07338	3.6184	3.98665	3.99256	3.76703	3.64037	3.83365
Alox15	6.41643	5.93397	5.94106	5.68937	5.98479	5.19963	5.63607	5.62574
Alox5	5.28631	4.81332	5.27752	4.9704	5.40127	5.30404	4.91858	4.63453
Alox5ap	8.55023	8.76087	9.01325	8.65036	9.33137	8.7417	8.91254	9.18899
Alox8	7.12843	6.90438	6.59168	6.58654	7.21238	6.57416	6.89181	6.99336
Aloxe3	6.86027	5.628	5.5439	5.85085	9.64113	7.38011	7.92715	8.1426
Alpi	15.8886	15.5507	15.8498	16.113	14.7361	15.7586	14.8998	15.1381
Alpk1	7.40048	7.93466	8.02261	7.6923	8.05558	8.1612	8.4207	7.94397
Alpk2	4.68188	3.95023	3.62993	4.19992	3.78384	3.80034	3.76597	4.1403
Alpk3	5.11339	5.03212	4.55954	4.98381	4.93957	5.15461	5.61829	5.28352
Alpl	5.08651	5.15079	4.71194	5.47343	5.59149	5.47403	5.55056	5.11584
Alppl2	4.13057	4.12914	3.79836	3.78621	4.66101	3.37795	3.78566	3.94687
Als2	8.34627	8.21978	9.89716	10.4256	9.95745	10.353	10.1877	10.0185
Als2cl	5.5816	6.42218	6.72382	6.91272	8.53273	7.35914	7.68572	7.72561
Alx1	5.58752	5.18105	4.33978	4.63845	4.69403	4.72944	4.79429	5.29537
Alx3	3.92609	3.95073	4.11514	3.4116	3.98637	3.95318	3.70931	3.89944
Alx4	4.50964	4.55414	4.28346	4.24429	4.40672	4.27841	4.09559	4.36187
Alyref	13.5176	13.4941	13.2194	13.1815	13.791	13.451	13.7522	13.4576
Alyref2	7.23179	7.3707	7.46013	7.29096	7.25061	7.25749	7.25165	6.89023
Alyreffm1	4.53764	4.35743	4.23699	3.78108	4.37373	4.0118	4.15915	3.86863
Alyreffm10	4.77765	4.69996	4.40773	4.82823	5.24169	4.40542	4.73433	4.97405
Alyreffm11	3.96004	3.89761	3.86426	3.9557	4.53689	3.90729	4.02549	4.03976
Alyreffm4	4.22039	4.01538	4.02636	3.6362	3.69003	3.81017	3.78653	3.52974
Alyreffm5	5.99475	4.92749	5.33949	5.28954	5.93025	5.23729	5.59363	5.87606
Alyreffm8	5.92369	4.89753	5.4038	5.20389	6.02489	5.23327	5.5397	5.9124
Amacr	6.21654	6.75006	7.05011	6.53483	6.41962	6.49566	6.53324	6.25246
Ambn	4.10039	3.93238	4.13768	4.15831	4.09743	3.69091	4.06421	3.86693
Ambp	4.88879	4.5668	4.62909	4.25451	4.85064	4.44703	5.02849	4.40636
Ambra1	14.5847	13.4218	13.4448	13.5422	13.123	13.9875	13.8856	13.3778
Amd2	9.61315	10.5477	10.8311	10.5417	10.9088	10.2989	10.3677	10.1688
Amdhd1	4.2425	3.7384	3.65899	3.79599	3.81838	3.64437	3.93327	3.96528
Amdhd2	11.112	11.1477	11.5068	11.9329	11.3375	11.8134	11.6419	11.2958
Amelx	4.0907	4.43407	3.69956	4.18377	4.41228	4.60792	3.88944	4.30038
Amer1	7.41127	7.36696	7.10576	7.19475	6.56308	6.9255	7.01482	7.1748
Amer2	4.12264	3.9769	3.86524	3.8055	4.10413	3.77573	4.36373	4.2176
Amer3	3.4213	2.93026	2.95794	3.41651	2.87816	3.06347	2.92693	2.96513
Amfr	9.57671	10.2893	10.0863	10.5093	10.5263	10.7699	10.7418	10.4587
Amh	3.35143	3.24736	3.27657	3.23486	3.43271	3.22911	3.39927	3.13993
Amhr2	3.84323	4.19704	3.87958	3.87019	4.11894	4.37147	4.30419	4.2454
Amigo1	9.10313	9.10304	9.05718	8.81743	8.34675	8.40286	8.92116	8.8845
Amigo2	5.44349	4.883	5.54309	5.31024	5.39294	5.28596	5.40133	5.39753
Amigo3	6.72602	6.41369	6.93928	6.7897	7.01451	6.50141	7.35063	7.16047
Ammecr1	10.6087	10.716	10.7615	10.0874	10.1891	10.3902	10.6336	10.3077
Ammecr1l	11.9123	11.6224	11.5187	11.5147	11.5322	11.492	11.3686	11.2154
Amn	8.82601	9.33909	9.4833	9.86166	8.48565	9.52158	9.20692	8.92741
Amn1	10.4358	10.4106	10.2959	10.5288	9.99189	9.15902	9.48309	9.47109
Amot	7.98706	8.3954	8.38661	8.05143	8.28285	8.29931	8.47381	8.35156
Amotl1	6.77837	6.93966	6.72567	6.92581	7.92664	7.0937	8.04433	7.56263
Amotl2	6.83884	7.40362	7.16648	7.18388	7.45799	7.08168	7.30026	6.94385
Ampd1	3.62341	3.4949	3.24462	3.30368	3.31835	3.88245	4.0709	3.77358
Ampd2	9.33158	9.45734	9.6908	9.62572	9.54443	10.1184	9.55492	9.58582
Ampd3	11.4687	11.5718	11.8584	11.6528	11.4345	10.6647	11.7857	11.1597
Amph	6.20859	6.07077	6.02391	6.33443	5.97264	5.94116	6.18572	6.52593
Amt	4.88204	5.11793	5.06694	5.24699	5.19709	4.52856	4.5771	4.47354
Amtn	4.67333	4.72147	4.69529	4.95516	4.54509	4.35849	4.57316	4.6218
Amy1	4.58304	5.99723	5.27285	5.32073	5.97702	5.16722	6.80996	5.67455
Amy2a1	4.49049	4.70177	5.11266	4.82406	4.94552	4.74397	5.04561	5.1892
Amy2a2	4.49049	4.70177	5.11266	4.82406	4.94552	4.74397	5.04561	5.1892
Amy2a3	4.49762	4.74988	5.13885	4.68022	4.9334	4.79423	5.05814	5.04907
Amy2a4	5.44053	5.35466	5.81973	5.47315	5.53996	5.3957	5.67295	5.88594
Amy2a5	4.3692	4.43168	5.07343	4.77582	4.90506	4.7984	4.71206	4.80078
Amy2b	4.86172	4.20118	4.37432	5.06536	4.37143	4.36029	4.25211	4.24943
Amz1	6.43382	6.6199	6.40009	6.59517	6.19746	6.25709	5.87601	6.77258
Amz2	12.202	12.4206	12.5485	12.4344	12.7442	12.2797	12.3656	12.3625
Anapc1	11.4841	11.8863	11.7218	11.5988	11.0359	11.5058	11.4984	11.427
Anapc10	11.0533	10.2047	10.3821	10.1622	10.068	9.52699	9.36884	9.79633
Anapc11	9.25069	8.82831	8.68527	9.07075	9.06022	8.8905	8.95669	8.89781
Anapc13	14.7881	13.829	13.8122	13.7714	14.4025	14.4318	14.5454	13.9868
Anapc15	11.8662	11.8752	11.8361	11.4652	11.8062	11.1274	11.7356	11.8692
Anapc16	11.5865	12.0776	11.7674	12.108	12.1491	12.4234	12.3378	12.4566
Anapc2	11.6285	11.8813	11.8991	12.0653	11.9153	11.9499	12.2451	11.933
Anapc4	10.6849	10.8097	10.9176	10.8389	11.0214	10.6222	10.9347	10.8391
Anapc5	13.002	14.0829	14.2298	14.2119	14.4007	13.8091	14.0355	14.3733
Anapc7	8.02401	8.81211	8.85624	8.6977	8.60277	8.68147	8.76674	8.76442
Ang	10.8212	10.6579	10.4799	10.1186	11.1649	10.7838	10.9601	10.6805
Ang2	7.35929	6.97407	7.13806	6.97657	7.44889	7.49859	6.87122	7.37326
Ang3	8.39385	7.4549	7.94194	7.77315	8.62619	8.23571	7.92986	8.64758
Ang4	16.2984	15.6652	16.0244	15.9703	16.4917	16.1963	16.0137	16.1049
Ang6	4.86534	4.6975	4.42998	4.39154	5.14834	4.4647	4.76591	4.71373
Angel1	6.15146	5.82607	6.03971	5.9575	5.89615	5.90924	6.0717	6.16746
Angel2	10.3896	11.2884	11.1524	11.2754	10.4779	10.4215	10.5863	10.6468
Angpt1	6.44384	6.96602	7.34662	7.0744	6.82064	6.37929	6.53541	6.79973
Angpt2	6.96285	7.38353	7.83376	7.72034	8.85842	7.63805	8.07077	7.78883
Angpt4	6.69406	6.69942	6.84061	6.35596	7.00056	6.37142	6.53101	6.78136
Angptl1	9.36959	8.85145	8.67174	8.33865	8.77473	7.59244	7.80709	7.75451
Angptl2	7.67899	7.99577	8.58634	8.34145	7.91527	7.95569	8.10356	8.07321
Angptl3	4.1475	4.20954	4.50427	4.36394	4.36664	4.29568	3.97221	4.24073
Angptl4	9.24174	8.9047	9.62149	9.76792	10.0576	10.9216	11.8914	10.9886
Angptl6	6.04224	6.28807	6.27284	5.71544	6.54242	6.05766	5.79208	5.90414
Angptl7	5.87585	6.05524	5.87123	5.86594	5.58816	6.04003	6.03557	6.12031
Angptl8	6.81204	6.34022	5.95926	6.10181	6.22053	6.08547	5.6633	5.85698
Ank	8.68569	9.93051	9.79379	10.2177	8.90823	8.76005	9.33835	8.87664
Ank1	5.84312	5.67867	5.5163	5.32282	5.04336	4.86307	5.17347	5.12431
Ank2	5.59285	6.09434	5.87564	5.75218	5.74489	5.05657	5.38309	6.10082
Ank3	10.5928	10.3523	11.8714	12.863	10.2851	10.7164	10.9535	10.9248
Ankar	5.63677	4.89018	4.66656	4.58592	4.83853	5.1878	4.86622	5.19454
Ankdd1a	6.39359	6.28627	6.47006	6.4743	6.85893	6.59879	6.69957	6.50641
Ankdd1b	4.4135	4.46795	4.37183	3.8439	4.73077	3.6117	3.88408	4.54751
Ankef1	4.79659	4.58143	4.16476	4.49586	4.45165	4.23106	4.64003	4.43227
Ankfn1	3.98627	4.05824	3.99095	3.98071	4.05366	4.10978	4.08609	4.03252
Ankfy1	11.7564	12.4119	12.4951	12.0922	11.6959	11.9347	11.9168	11.954
Ankhd1	11.3495	11.3157	11.3986	11.3758	10.9267	10.4381	10.8228	10.8015
Ankib1	11.0212	10.7865	10.8032	10.5864	10.0393	10.3793	10.3282	10.5946
Ankk1	2.88014	2.78912	2.86036	3.12812	3.17678	2.86118	2.8036	3.07802
Ankle1	7.99827	8.43421	8.39942	8.24415	7.91752	8.00828	8.19693	7.96999
Ankle2	9.44175	10.4622	10.4723	10.6658	10.1175	10.2159	10.2654	10.4714
Ankmy1	4.53538	4.65198	5.00283	4.20563	4.8268	4.43009	4.5804	4.72493
Ankmy2	9.66666	9.63096	10.0391	10.2358	8.5956	9.18203	9.19122	8.88287
Ankra2	11.0009	10.9142	11.1368	11.1333	10.7516	10.7559	10.7262	10.6512
Ankrd1	6.58238	6.78423	6.41537	6.57469	7.02137	7.04173	7.35024	7.23289
Ankrd10	9.28828	10.4586	10.4896	10.6307	10.4385	10.2977	10.1433	10.2723
Ankrd11	10.5896	11.2026	10.8909	10.8364	11.144	11.3188	11.3056	11.221
Ankrd12	12.431	12.3467	12.7066	13.0791	12.3076	12.3222	12.6271	12.5055
Ankrd13a	13.6716	14.4195	14.4926	14.3721	13.6153	14.1765	14.1331	14.1184
Ankrd13b	9.53516	8.6932	8.70383	9.51244	8.93376	9.59685	9.13308	9.17177
Ankrd13c	11.8395	11.677	11.7401	11.4245	11.46	11.2959	11.5409	11.1544
Ankrd13d	6.27941	6.86419	6.77544	7.11975	7.05929	6.09237	6.64794	6.89323
Ankrd16	5.63543	5.97614	6.08699	6.44316	5.875	6.25221	6.12225	5.79042
Ankrd17	13.5319	14.1821	14.3429	14.3711	14.0148	14.0217	14.0062	14.107
Ankrd2	4.40708	4.2314	4.07706	4.10407	4.62274	4.75582	4.57982	4.4439
Ankrd22	5.75109	5.84438	6.11227	5.98952	7.92404	8.29255	8.33064	8.25924
Ankrd23	7.97862	7.67889	7.5368	7.67246	6.88971	7.25495	7.36608	7.12759
Ankrd24	10.5538	10.387	10.7662	10.3587	10.9549	10.4893	10.5376	11.153
Ankrd26	8.9838	8.55096	8.61142	8.39548	7.99974	7.82983	7.87749	8.18065
Ankrd27	8.56241	9.33258	9.46087	9.27925	8.20926	8.87186	8.78182	8.63156
Ankrd28	9.20581	9.54676	9.8228	9.39996	9.70936	9.58359	9.87687	9.80009
Ankrd29	6.43302	5.97396	6.16576	6.66938	6.15218	6.1606	5.62793	6.56584
Ankrd33	3.86148	3.97852	3.56798	3.5284	3.8304	3.68791	3.78448	3.52844
Ankrd33b	6.88343	7.4661	7.21237	7.40425	7.68547	7.86634	6.72817	7.58162
Ankrd34a	3.92779	3.81767	3.6607	3.8395	4.23185	3.73907	4.20261	3.9425
Ankrd34b	5.32754	5.38851	5.31497	5.23728	5.28973	5.38011	5.35134	5.32122
Ankrd34c	3.23764	3.34003	3.18276	3.08127	3.34824	3.19572	3.05253	3.36868
Ankrd35	5.59445	5.52342	6.37488	5.78094	5.52102	5.41804	5.50155	5.95641
Ankrd36	2.9973	2.74401	2.96139	2.92709	3.1686	2.96285	2.59036	2.78277
Ankrd37	9.13334	8.65302	8.6815	7.888	7.23265	6.2525	6.44965	7.0178
Ankrd39	5.07484	5.27123	5.33963	5.56988	5.27264	5.53718	5.10676	5.491
Ankrd40	10.6343	10.8599	10.9134	11.0009	10.7215	10.5916	10.7156	10.5599
Ankrd42	7.26171	7.07381	7.01501	6.9859	6.88718	6.38797	6.50647	6.76704
Ankrd44	8.83542	9.62129	9.30489	10.2481	10.3558	10.1408	10.5971	10.3803
Ankrd45	4.721	4.98168	4.15127	4.30819	4.70329	4.29197	4.10674	4.04792
Ankrd46	10.7285	11.2418	11.1402	10.8478	10.8632	10.8285	10.5813	10.7451
Ankrd49	10.0615	9.98942	10.0111	9.85853	9.60293	9.34058	9.64584	9.10047
Ankrd50	9.52976	9.7652	9.92105	9.35572	9.77432	9.62087	9.93045	9.90083
Ankrd52	9.29086	9.79253	9.65628	9.69371	9.13724	9.88022	9.89981	9.72459
Ankrd53	3.47192	3.43201	3.39851	3.4588	3.48311	3.3025	3.54459	3.48544
Ankrd54	7.92167	7.83418	8.09203	7.97682	7.38078	7.7694	7.49545	7.51468
Ankrd55	5.85251	5.62141	5.65562	6.12398	5.15286	6.00388	5.29646	5.39166
Ankrd6	6.41376	6.17814	6.24627	6.45776	6.50784	6.06931	6.15064	6.31365
Ankrd60	3.60874	3.26923	3.47572	3.71906	3.79409	4.19054	4.01714	3.9762
Ankrd61	4.99456	4.64646	5.02779	4.95682	4.92988	4.59333	4.79507	4.72384
Ankrd63	8.18893	7.19762	7.2606	7.2878	6.99065	7.32321	7.22335	7.35392
Ankrd66	6.51651	6.79387	6.64693	6.59198	7.01333	6.92055	6.66882	7.03529
Ankrd7	4.52412	4.56468	4.60678	4.30615	4.59707	4.75357	4.33269	5.35586
Ankrd9	6.95003	8.57727	8.61856	9.08995	8.78227	9.34937	8.70757	8.98222
Anks1	7.58573	8.12107	7.46983	7.98701	7.31185	7.35546	7.55874	7.53669
Anks1b	4.85399	4.87819	4.32747	4.425	5.5628	4.47966	4.17889	4.86109
Anks3	8.86427	9.19087	8.54639	8.80596	7.94681	8.14212	8.44381	8.31835
Anks4b	11.8428	11.6504	12.1712	12.2928	10.3308	11.3497	11.1479	11.0214
Anks6	5.9218	5.37405	5.10358	5.48911	5.4533	5.21676	5.48305	5.29781
Ankub1	3.91429	3.16582	3.40502	3.07814	3.35728	3.53684	3.40292	3.6254
Ankzf1	9.98483	11.3438	11.2544	10.9617	10.1846	10.0494	10.118	10.1959
Anln	7.79546	7.55095	7.95309	7.72987	7.92815	7.54903	7.99232	7.48681
Ano1	10.5799	11.0746	10.8967	10.7935	11.4781	10.3638	11.0684	10.9349
Ano10	11.3268	11.7971	11.8806	12.0335	11.9648	11.4284	11.4285	11.6283
Ano2	6.59681	6.63797	7.33549	6.77317	7.08737	6.91185	7.11581	7.24536
Ano3	3.82939	3.41608	4.01666	3.30826	3.5067	3.61427	3.13723	3.50917
Ano4	6.40595	5.96413	6.06361	6.2146	5.8193	5.99095	5.91424	5.85233
Ano5	4.26623	4.31397	4.89212	4.17972	4.52202	4.40955	4.5022	5.05819
Ano6	12.0176	11.6864	13.1632	13.1011	13.7634	13.4581	12.9372	13.4486
Ano7	10.7088	10.6373	10.7598	10.4394	10.3403	10.6668	10.8791	10.3404
Ano8	4.14264	4.48792	4.79852	4.66179	4.52296	4.0053	4.39767	4.36543
Ano9	12.2412	13.32	13.3629	12.7345	13.3524	13.3208	13.3106	13.3255
Anp32a	15.3689	14.7899	14.8137	14.7113	15.019	14.5317	14.6039	14.7902
Anp32b	13.9954	13.0138	13.1517	12.8133	13.5266	12.9222	13.1606	13.1856
Anp32e	9.59936	10.5166	10.4663	10.0048	10.5632	10.1176	10.3349	10.2498
Anpep	17.7803	17.6589	17.7153	17.8687	17.2146	17.7744	17.7198	17.6444
Antkmt	9.39664	10.3521	10.327	10.7498	10.2121	9.94062	10.1953	10.17
Antxr1	11.4581	10.8624	10.8918	10.6367	11.4905	11.0969	11.486	11.3377
Antxr2	10.4557	11.5251	11.4967	10.9371	11.5361	11.0477	11.3859	11.4097
Antxrl	5.11316	5.05729	4.80663	4.81869	4.88968	4.74096	4.91893	4.94463
Anxa1	8.45947	9.09222	8.75928	8.9482	12.1586	10.2862	11.7858	11.2952
Anxa10	3.56271	3.30417	3.54861	3.71149	3.44025	3.73815	3.05717	3.60589
Anxa11	13.0375	12.9536	13.0843	12.9845	12.9399	12.9415	13.1304	12.7613
Anxa13	13.7082	13.2434	14.2358	14.0603	14.4949	14.6583	14.054	14.4296
Anxa2	14.5013	14.8142	15.0177	14.9365	15.3516	15.1561	15.2871	15.2575
Anxa3	7.23041	7.12872	6.86435	7.02915	9.83829	7.65435	8.88817	8.73779
Anxa4	16.5142	16.5577	16.8683	16.6618	17.0512	17.1005	16.9955	16.9579
Anxa5	11.5227	12.3572	11.7908	11.9049	13.2089	12.0353	12.6249	12.3395
Anxa6	9.74768	11.3237	11.063	10.9804	11.5639	10.6558	11.2129	11.1456
Anxa7	8.24334	9.86626	10.3348	10.8865	10.8537	10.7873	10.8161	11.0346
Anxa8	4.50797	5.05106	4.81835	5.14504	5.55565	4.94966	5.03621	5.1518
Anxa9	7.53476	7.62318	7.43864	7.16868	7.47508	7.37101	7.66204	7.62288
Aoah	8.96375	9.15612	9.6673	9.53935	9.55331	9.2046	9.4087	9.25527
Aoc1	15.201	15.1523	14.9998	15.4572	14.4344	14.8423	14.3137	14.6797
Aoc1l1	6.10684	5.5467	5.8743	5.93958	5.59747	6.06534	5.43268	5.96023
Aoc1l2	3.74736	3.64404	3.40501	3.46402	3.52751	3.33215	3.34602	3.18587
Aoc1l3	4.99244	5.0941	4.97941	5.32968	5.20044	5.0206	4.98083	5.35686
Aoc2	7.17131	6.88888	6.66132	6.95115	6.99273	6.76011	7.20537	7.06095
Aoc3	9.88847	8.74123	8.40288	8.23626	8.20959	7.49042	9.22848	8.22041
Aopep	6.42418	6.48359	6.36135	6.53682	6.53006	6.04849	6.63479	6.35073
Aox1	4.83013	5.50771	6.18478	6.307	5.5023	5.51002	6.66374	6.05094
Aox2	4.05561	3.81188	3.83239	4.36005	4.15083	3.49157	3.87693	4.31758
Aox3	4.79556	4.59671	4.68782	4.17161	5.14126	4.70808	4.73156	4.69589
Aox4	4.77424	4.56407	4.48946	5.3227	4.8761	4.96451	4.91244	4.58097
Ap1ar	14.2189	13.699	13.584	13.3958	13.4738	13.3525	13.3848	13.3543
Ap1b1	10.8107	12.0613	12.3757	12.0847	11.7993	12.1801	12.1973	12.2032
Ap1g1	14.3802	14.3454	14.1736	13.8618	13.7904	13.8767	13.9359	13.9914
Ap1g2	10.5731	10.4432	10.618	10.3184	9.29866	11.0618	10.9433	10.185
Ap1m1	9.76454	10.1868	9.97111	10.1949	9.25147	9.84243	9.90297	9.4237
Ap1m2	10.6713	11.1882	11.2099	11.1986	10.9164	11.8699	11.6543	11.5617
Ap1s1	12.4909	11.8754	12.0807	11.7037	12.047	12.5153	12.7705	12.3426
Ap1s2	9.47893	9.18449	8.95472	9.29728	9.4152	8.71342	9.32458	8.87392
Ap1s3	7.8259	7.4715	7.47656	7.12278	7.49739	7.30818	7.57802	6.92203
Ap2a1	9.70078	10.2851	10.6084	10.5309	10.5232	10.6844	10.5125	10.483
Ap2a2	10.5822	12.1922	12.2537	12.1261	12.1823	12.1277	12.1546	12.3102
Ap2b1	11.4789	12.44	12.4881	12.4225	12.5264	12.5835	12.6976	12.5458
Ap2m1	15.9589	16.3111	16.3428	16.2006	16.0802	16.1983	16.2442	16.1872
Ap2s1	9.40386	9.98723	10.1843	9.76891	9.54882	10.3984	10.409	9.7734
Ap3b1	13.18	13.5991	13.7865	13.7142	13.5496	13.5066	13.4636	13.4363
Ap3b2	4.22598	4.23106	4.33417	4.47731	4.69631	4.06986	4.63115	4.69237
Ap3d1	13.8268	13.7663	13.7499	13.489	13.3478	13.4752	13.4066	13.4349
Ap3m1	13.7531	14.4161	14.3125	14.4827	13.6375	13.7275	13.8003	13.8003
Ap3m2	6.57786	6.85658	6.8615	6.97323	6.62777	6.21709	6.82596	6.29707
Ap3s1	12.9366	12.6593	13.0349	12.6388	12.9368	12.8492	12.7923	12.2542
Ap3s2	9.35894	9.76056	9.39948	9.08531	8.98594	9.27834	9.6922	9.00945
Ap4b1	6.21305	7.39745	7.07577	6.81494	6.45852	6.41037	6.55846	6.49301
Ap4e1	8.71848	8.74144	8.61746	8.32009	8.5995	8.53041	8.85967	8.61272
Ap4m1	8.12997	8.7221	8.36815	8.16875	8.55085	8.91692	8.94023	8.77234
Ap4s1	8.32218	8.83704	8.89503	8.88753	9.03088	8.85219	8.76374	8.75512
Ap5b1	7.17525	7.87767	8.00395	8.05784	6.27551	7.14505	7.07595	6.73427
Ap5m1	9.67921	10.5651	10.6573	10.0499	9.55881	9.48454	9.49765	9.25597
Ap5s1	9.18956	9.43165	9.72032	9.66346	9.42774	9.39945	9.43523	9.19239
Ap5z1	9.32186	9.6874	9.79823	9.10959	9.65601	9.1446	8.43704	9.12161
Apaf1	12.5585	12.8218	13.1315	12.1861	11.8734	12.6249	12.4365	12.5076
Apba1	8.30055	8.29208	8.02707	8.16833	8.21984	7.73508	7.78866	7.74122
Apba2	5.36087	5.50562	5.89479	5.43134	6.03876	5.48538	5.3614	5.53849
Apba3	9.72467	9.96238	10.6158	10.2017	9.86171	10.5132	10.2268	10.2999
Apbb1	6.62289	6.84749	6.45663	7.15782	6.63032	6.80811	6.30067	6.75141
Apbb1ip	8.53141	8.57152	8.25727	8.87941	7.34358	8.11723	7.80057	7.63925
Apbb2	14.8364	13.9919	14.0884	14.1281	14.3585	14.3759	14.345	14.0349
Apbb3	7.9069	7.72911	7.8685	8.0158	9.42186	8.46299	8.6735	8.52045
Apc	12.3529	12.3929	12.4123	12.6329	11.9355	12.0862	12.0691	12.176
Apc2	5.17076	5.2099	5.09332	4.57765	5.56463	5.3548	5.33863	5.48441
Apcdd1	6.72205	6.70226	6.62669	6.52431	7.1347	6.78879	7.35221	7.15559
Apcs	5.42823	5.48343	5.09766	5.06834	5.43356	5.16474	5.5377	5.5904
Apeh	11.1147	12.2021	12.2466	12.1849	11.6299	12.2049	12.1815	12.0784
Apex1	7.28317	7.95366	7.98285	8.0677	7.72729	8.22072	7.76149	8.04983
Apex2	6.03476	6.0814	6.32993	6.21245	6.51854	6.55114	6.93883	6.56164
Aph1a	13.2238	14.0208	14.0386	14.106	13.8614	14.3056	14.1507	14.0378
Aph1b	8.53637	8.59149	8.29535	8.20269	8.35778	7.93171	7.97047	7.9608
Aph1c	6.41745	6.40237	6.29295	6.47396	6.40928	6.25293	6.15874	6.06862
Api5	12.3694	12.9387	12.7638	12.5354	12.5696	12.6413	12.6112	12.626
Apip	7.27711	7.30139	7.24158	7.21678	7.14671	7.02682	7.17202	7.2122
Aplf	8.70512	8.2363	8.06634	7.95381	7.20328	7.30678	7.21147	7.14742
Apln	4.96335	5.43194	5.96561	5.25182	5.97241	5.73018	5.78255	5.88992
Aplnr	6.9104	6.61204	6.28065	6.53239	6.06687	6.2074	6.08774	6.04017
Aplp1	12.0228	12.0537	12.3553	12.5065	9.73574	12.2024	11.561	11.1005
Aplp2	12.3794	12.5221	12.673	12.3271	12.9164	12.6924	12.677	12.7029
Apmap	9.61246	10.6545	10.8854	10.4681	11.2206	11.1174	11.0621	10.9538
Apoa1	17.2412	17.3493	17.6246	17.4764	16.2132	17.3175	16.8836	17.1712
Apoa2	3.96069	4.01477	3.83139	3.9458	4.17469	3.59549	3.81096	4.05604
Apoa4	14.2065	12.0325	15.5915	14.629	9.7388	15.4751	13.2249	14.1817
Apoa5	4.19191	4.0297	4.41847	4.07284	4.09031	3.92728	3.8826	4.18533
Apob	16.4227	16.5239	16.6649	16.5281	15.455	16.3033	16.0785	16.2569
Apobec1	12.0155	12.0261	11.4911	11.9606	12.1758	12.0153	12.3533	12.2419
Apobec2	4.89258	5.01357	4.63171	4.64531	4.54833	5.03963	5.53667	4.72823
Apobec3	9.17641	10.1242	9.7402	10.7616	9.82175	10.4414	9.95061	9.5817
Apobec4	3.81616	3.34557	3.37255	3.59527	3.68089	3.47602	3.41819	3.29005
Apobr	6.0749	5.57975	5.98257	6.35528	6.25277	6.2505	6.89945	6.07005
Apoc1	4.4487	4.56536	4.29731	4.15582	4.31425	4.12073	5.14374	4.4275
Apoc2	14.6038	12.2503	13.0744	10.3394	9.89793	13.8502	12.2723	12.2601
Apoc3	9.74265	8.70249	10.0266	9.48579	8.58543	10.7824	9.07675	9.09869
Apod	5.92635	7.4927	7.16181	7.40125	8.23976	7.32093	8.39835	7.923
Apoe	13.2334	13.7197	13.6486	14.4088	14.3289	14.2461	14.2743	14.0012
Apof	3.45816	3.7474	3.47903	3.58869	3.62539	3.76808	3.41672	3.34836
Apoh	4.70965	4.47281	4.76698	4.37507	4.53475	5.15362	4.4541	4.36146
Apol10a	12.1788	12.5714	12.4252	11.86	10.5021	11.4099	11.0013	11.0792
Apol10b	8.30269	9.08695	8.81328	8.55569	7.59514	7.46906	7.51998	7.69833
Apol11a	6.38107	5.80061	5.48415	6.08553	4.79901	4.97745	5.26244	5.31237
Apol11b	7.667	7.10582	7.63093	7.11417	6.54336	7.50091	6.94571	6.85175
Apol6	7.61438	7.34868	7.07248	7.03236	7.41851	7.06949	8.10173	7.13231
Apol7a	12.2279	11.4	11.3381	9.20337	7.11077	8.38168	7.70564	8.06102
Apol7b	8.95258	9.10941	9.24485	9.47999	7.8939	8.93505	8.83417	9.0208
Apol7c	9.81376	10.6892	10.7074	10.4573	6.33654	6.70071	5.86727	6.08876
Apol7d	5.90416	5.61375	5.84918	5.49391	5.43104	5.80014	6.09306	5.83794
Apol7e	8.01047	8.12514	8.37937	8.68488	6.90679	8.38778	7.59976	7.3272
Apol8	5.8604	6.05711	6.45412	5.93115	7.10004	6.88118	6.89429	7.03829
Apol9a	8.927	9.09859	10.0754	9.04173	7.28841	7.41225	7.56366	7.82646
Apol9b	6.46815	6.15578	7.22975	6.03631	5.08005	5.55151	5.19957	5.55881
Apold1	6.91855	7.04465	7.19765	6.7331	10.214	8.74987	9.01341	9.43282
Apom	3.09436	3.19538	3.11479	3.14715	2.9612	3.14132	2.83079	2.90511
Apon	2.81265	2.92146	2.95859	2.82866	2.6909	2.75496	2.94905	2.9492
Apoo	12.3086	12.5464	12.4897	12.1323	12.2806	12.2278	12.4055	12.1854
Apool	8.01187	8.15364	8.16221	7.92173	8.58699	8.2461	8.49517	8.55289
App	14.5291	15.0063	15.0607	15.1399	14.5715	14.8288	14.7267	14.7566
Appbp2	11.9959	12.5625	12.603	12.5428	12.604	12.3067	12.4583	12.4797
Appl1	12.8952	12.6882	13.0229	12.6927	13.1291	13.0889	13.1567	13.141
Appl2	10.9275	11.4751	11.6113	11.5013	11.5015	10.9348	11.0024	11.1037
Aprt	12.4961	11.2382	11.3813	11.2057	11.2348	12.3019	12.0472	11.6547
Aptx	8.76767	8.99727	9.12036	8.69147	8.9371	8.86945	8.88615	8.62436
Aqp1	10.2835	11.2259	12.3277	13.026	12.9546	12.6196	12.3319	12.6636
Aqp11	13.0168	13.425	13.7956	14.1066	14.0283	14.0401	13.8666	13.8622
Aqp12	6.3022	5.55403	5.78216	5.64411	5.81677	5.4595	5.88304	5.4204
Aqp2	4.05206	4.28023	4.10898	4.04216	4.27451	3.96528	4.38507	4.57482
Aqp3	5.72874	5.35815	5.81369	5.23451	5.7396	5.83068	4.81154	5.62592
Aqp4	10.3939	10.6252	10.0496	9.27123	9.26596	10.2215	10.7037	10.2535
Aqp5	5.38554	5.3448	4.65907	5.20987	5.25587	5.09967	5.41435	5.54803
Aqp6	4.58137	4.58856	4.67728	4.49642	4.49037	4.77361	4.00157	4.73372
Aqp7	11.3822	11.6179	11.4555	13.0365	9.16331	9.38288	9.60495	9.29594
Aqp8	5.36467	4.9414	5.20081	5.32171	5.06262	5.11595	5.24247	5.06081
Aqp9	3.83669	4.11968	4.27556	4.27839	4.51107	4.37882	4.02897	4.63141
Aqr	9.91136	10.4578	10.2524	9.79061	9.7455	10.0317	10.3284	9.71127
Ar	3.89322	4.84961	4.77968	4.2861	4.51935	4.55749	4.64136	4.42991
Araf	11.7238	11.8207	11.7863	11.6432	11.4414	11.5692	11.7424	11.4514
Arap1	8.66615	8.58895	8.58266	8.60508	8.42138	8.00831	8.23208	8.37792
Arap2	11.8455	11.4253	11.6556	11.2829	11.3469	11.3642	11.5083	11.4518
Arap3	6.51424	6.88267	6.69034	6.32671	7.07914	7.64769	6.98052	7.29864
Arb2a	7.66465	7.72017	7.80961	8.09532	7.63871	7.48446	7.65449	7.54615
Arc	6.16617	5.82873	5.70776	5.6768	7.73977	7.23196	7.67342	7.20628
Arcn1	14.1873	14.5568	14.455	14.4593	14.2974	14.2777	14.3059	14.3723
Areg	9.13876	8.9313	8.95594	8.66384	15.018	13.8354	13.4465	13.837
Arel1	15.1137	15.5433	15.5154	15.2372	14.2363	14.2264	14.2432	14.2578
Arf1	15.6918	16.1701	16.197	16.1228	15.9757	16.1606	16.2213	16.0657
Arf2	10.3149	10.6142	10.3972	10.4502	11.8947	11.5031	11.894	11.7227
Arf3	11.8678	11.8313	11.8798	11.5762	11.6981	12.2232	11.9983	11.7123
Arf4	15.6688	15.2963	15.0446	14.7046	15.1031	15.2076	15.192	15.0167
Arf5	12.0658	12.144	12.0736	12.02	12.0018	12.2075	12.2484	12.1829
Arf6	14.9081	15.1505	15.1438	15.0161	14.9661	14.9654	15.1608	14.9351
Arfgap1	12.0539	12.8909	12.5595	12.8824	12.8724	13.5623	13.5707	12.6872
Arfgap2	9.972	11.119	11.099	10.9836	11.3008	11.0563	11.3246	11.1056
Arfgap3	13.6842	13.8737	13.9279	13.8941	13.7253	13.9609	13.7435	13.7496
Arfgef1	14.7518	14.6629	14.633	14.493	14.0782	14.1942	14.3491	14.2837
Arfgef2	10.7404	11.1183	10.9491	11.1911	10.8442	10.8203	10.9396	10.7303
Arfgef3	7.60131	7.82902	7.98632	7.16265	8.88307	8.69306	9.08029	8.64558
Arfip1	11.5314	11.8208	11.807	11.595	11.6984	11.6215	11.5847	11.3417
Arfip2	11.6765	12.0299	11.8663	11.6911	12.1809	11.9132	11.852	12.1637
Arfrp1	10.1188	10.9893	11.0699	11.0423	11.1219	10.9265	11.0726	10.9789
Arg1	4.86869	4.44745	4.39755	3.81615	4.40556	3.94003	4.03972	4.20106
Arg2	10.6918	10.82	11.1201	11.0896	12.3454	12.1632	11.4586	11.6621
Arglu1	10.0997	10.1544	10.1908	10.301	10.2506	9.78889	10.1144	10.1319
Arhgap1	14.252	13.9694	13.8803	13.8722	13.2642	13.8963	13.9158	13.6122
Arhgap10	6.85963	7.78019	7.66296	7.70141	8.61111	7.89537	8.02569	8.10162
Arhgap11a	10.0923	10.336	10.3229	9.77875	9.8375	10.0673	10.1083	10.2789
Arhgap12	12.0985	12.4755	12.5252	12.3367	11.3343	11.7654	11.73	11.5513
Arhgap15	8.96343	10.6713	10.065	11.428	9.41997	9.56462	9.83624	9.79423
Arhgap17	12.8971	12.714	12.4279	12.2612	12.3323	12.6724	12.8681	12.6567
Arhgap18	13.5967	13.573	13.5424	13.4684	13.3151	13.1918	13.0743	13.0515
Arhgap19	7.6709	8.4694	8.62778	8.41017	8.78874	8.9124	9.0175	8.99656
Arhgap20	5.73892	5.83048	5.94107	5.44043	5.64383	5.54073	5.1012	5.30596
Arhgap21	13.4838	13.6785	13.8341	13.5872	13.8916	13.6695	13.9292	13.748
Arhgap22	5.63705	6.01552	5.66955	5.95542	6.51915	5.59716	6.3689	6.57398
Arhgap23	6.70218	5.95089	6.42747	5.85553	6.96361	5.96842	6.61835	6.67843
Arhgap24	9.0959	8.98294	8.46266	8.3852	8.45608	8.0582	8.21037	8.34201
Arhgap25	5.00892	5.37004	4.99862	6.58817	4.72815	5.24934	4.69795	4.97687
Arhgap26	13.9591	12.4491	11.7903	11.6622	10.7761	11.524	11.2125	11.0677
Arhgap27	9.32583	9.46609	9.71449	9.77535	10.2701	10.0089	9.73093	10.1564
Arhgap28	6.65093	6.90003	6.79852	6.533	8.29601	7.19735	6.95695	7.08046
Arhgap29	9.8404	10.2501	9.70286	9.57729	9.75599	9.31844	9.99003	9.77516
Arhgap30	7.39066	8.92416	8.34039	9.23436	7.80847	8.1633	8.21976	8.14236
Arhgap31	10.1112	10.3498	10.1554	10.2007	11.1261	10.9939	10.7925	11.1077
Arhgap32	13.8855	13.1716	13.1001	12.9783	12.6063	12.9715	13.3227	13.0086
Arhgap33	5.55613	5.82602	5.68778	4.92964	5.1523	5.27018	5.62805	5.54127
Arhgap33os	4.99371	5.13248	5.03624	4.60477	5.11543	4.763	4.65642	5.25814
Arhgap35	11.4442	10.6938	10.5221	10.3294	10.3599	10.1281	10.1995	10.4082
Arhgap36	6.44891	5.45442	5.57649	5.52906	5.69781	6.28145	5.13282	5.23788
Arhgap39	10.7545	11.1198	11.0391	11.0129	10.4977	10.1455	10.353	10.3983
Arhgap4	7.15978	7.70007	6.98984	7.64212	6.43792	6.76481	6.7982	6.62125
Arhgap40	4.32698	4.33716	4.39517	4.25336	4.61754	4.26992	4.26657	4.41594
Arhgap42	12.7179	12.7914	12.9108	12.6118	12.2981	12.5008	12.3004	12.5261
Arhgap44	5.4854	5.09358	4.98946	5.00348	5.69644	5.21792	5.36787	5.46472
Arhgap45	9.56208	9.78683	9.79443	10.5108	9.65067	9.87511	9.62831	9.84917
Arhgap5	14.1726	13.7345	13.5927	13.0771	13.0276	12.8732	13.0296	12.9165
Arhgap6	9.8134	9.53428	8.72725	9.02901	8.97925	8.48173	9.19835	8.67
Arhgap8	9.3958	7.52548	7.68873	7.35818	8.25882	8.64234	8.37722	7.95979
Arhgap9	6.10788	6.59626	6.68109	6.64431	6.56741	6.37701	6.77364	6.50347
Arhgdia	15.511	15.8169	15.8188	15.7535	15.4304	15.8141	15.9349	15.662
Arhgdib	10.1235	11.2106	10.3631	11.9511	9.86149	9.94718	10.2053	9.87676
Arhgdig	6.21543	5.86411	6.26188	6.04413	6.89003	6.30628	6.66223	6.7673
Arhgef1	11.1461	10.5522	10.2652	10.8954	10.1424	11.0614	11.0919	10.6726
Arhgef10	6.24034	6.52564	6.37176	6.77104	6.31087	5.85088	6.04331	6.07564
Arhgef10l	9.96765	10.0149	9.76219	9.06209	9.18371	9.11195	9.17957	9.21279
Arhgef11	11.4908	11.8308	11.6893	11.5872	10.6615	11.294	11.3456	11.0762
Arhgef12	8.73615	10.0058	10.0195	10.0205	10.0945	10.1532	10.1325	10.3533
Arhgef15	5.9249	5.97048	5.17963	6.1801	5.76221	5.86215	5.83111	5.77375
Arhgef16	11.0416	11.2282	11.3457	11.3107	10.4514	11.6862	11.4672	11.2769
Arhgef17	7.617	7.86166	7.59003	7.67338	7.92358	7.57133	8.13564	7.90295
Arhgef18	7.62256	8.63537	8.33318	9.06636	8.08829	8.0236	8.11529	8.18477
Arhgef19	8.1214	8.05257	8.51462	8.37205	8.04598	8.04885	8.25716	8.36324
Arhgef2	9.28571	9.44874	9.65916	9.43833	8.92371	9.39964	8.98653	9.03824
Arhgef25	6.3898	8.05357	7.86613	8.05858	6.92967	6.41742	6.67133	6.3233
Arhgef26	10.1498	9.83493	9.85761	9.9565	9.89678	9.48343	9.53529	9.6446
Arhgef28	9.65508	9.55731	9.41416	9.36505	9.8323	9.24146	9.55307	9.5636
Arhgef3	13.1767	12.8385	12.6658	12.7638	11.9931	12.1443	12.2712	12.1828
Arhgef33	5.96929	5.87659	5.67128	5.58831	5.40325	5.56293	5.87221	6.04049
Arhgef37	6.11909	5.54072	5.79271	5.65907	7.19101	6.17226	6.33652	6.54489
Arhgef38	11.7117	10.4976	10.3262	9.35185	10.4631	10.0039	10.0031	10.121
Arhgef39	7.84833	8.05491	8.28752	7.81184	8.30175	8.07771	8.45058	7.81987
Arhgef4	4.07572	3.84182	4.29781	4.31505	4.78462	4.47876	4.13772	4.40597
Arhgef40	3.70306	3.82653	3.79151	3.75387	3.58038	3.68594	3.90734	3.78195
Arhgef5	10.1126	10.7885	10.9228	10.4419	10.67	10.9371	10.6301	10.8919
Arhgef6	8.49512	9.92462	9.62159	10.6751	8.75962	8.98724	9.15361	8.80222
Arhgef7	11.3974	11.4043	11.692	11.516	11.6636	11.7897	11.7897	11.64
Arhgef9	6.08288	6.05176	6.22729	6.04672	6.14267	5.28489	5.33191	5.53484
Arid1a	13.9484	13.2437	13.1921	13.3229	12.799	13.0017	13.1473	12.8987
Arid1b	8.49291	8.4181	8.5588	8.9384	8.71789	8.76151	8.77374	8.0501
Arid2	11.3961	11.5353	11.3719	11.58	10.7903	11.0671	10.9983	10.9239
Arid3a	9.59136	9.89493	9.62686	10.0478	9.55094	9.8347	9.99696	9.93171
Arid3b	8.08463	7.87097	7.52897	7.99334	8.26211	8.26228	8.00944	8.28313
Arid3c	4.05206	4.2732	4.55903	4.54832	4.35791	4.46893	4.4059	4.28129
Arid4a	11.1798	11.422	11.5713	11.2383	10.9401	10.9078	10.9927	11.0848
Arid4b	10.5899	10.7279	10.8024	10.3672	10.7828	10.7322	10.6375	10.732
Arid5a	5.59245	5.4743	5.68006	5.54456	7.11267	6.431	6.47602	6.94636
Arid5b	13.9258	13.379	13.0685	13.3669	14.6629	14.101	14.4502	14.3972
Arih1	13.1464	13.2875	13.3813	13.2976	13.4057	12.9902	13.239	13.2825
Arih2	11.1094	11.6156	11.527	11.3471	12.2332	12.2616	12.3865	12.5828
Ark2c	5.01988	5.62519	5.75051	5.31492	5.83801	5.29493	5.58929	5.76935
Ark2n	9.42505	10.1303	10.1422	9.97098	9.99603	10.7084	10.3347	10.4143
Arl1	14.9014	15.2547	15.4142	15.1508	15.2971	15.2386	15.3707	15.3913
Arl10	5.67054	6.9665	6.67153	7.00759	6.36483	5.86291	6.31437	5.92753
Arl11	7.15193	7.43425	7.28206	7.10814	7.70869	7.28982	7.43252	7.43993
Arl13a	5.14816	4.6291	4.78501	4.36022	4.52583	4.69641	4.55341	4.85848
Arl13b	7.4168	7.74114	7.78848	7.7534	7.43577	6.67278	7.3925	6.82467
Arl14	7.94133	6.16705	8.21897	7.67013	11.4264	9.82424	9.5891	10.1396
Arl14ep	9.48674	9.20534	9.27613	9.397	9.73499	9.53301	9.58753	9.57568
Arl14epl	5.06283	5.20223	4.56461	4.72958	5.1582	4.97632	4.62441	4.72043
Arl15	8.04489	8.93812	8.35766	8.13084	8.20187	8.68643	8.11079	8.22169
Arl16	7.67507	8.21073	8.25597	8.19816	7.75048	7.55636	7.73896	7.10844
Arl2	8.62331	8.13577	8.24824	7.80524	7.88682	8.14714	8.15307	8.0036
Arl2bp	11.0044	12.4319	12.2547	12.2702	12.6316	12.8954	12.6939	12.9718
Arl3	10.0996	10.6626	10.506	10.3865	11.0861	10.2356	10.5931	10.4444
Arl4a	13.0945	13.3846	12.8161	12.1943	13.6387	13.7904	13.4082	13.6332
Arl4c	5.9173	6.51697	6.35757	6.81624	7.3087	7.33824	7.39828	7.13104
Arl4d	9.60981	9.87436	10.0041	9.90613	10.7459	10.141	10.3027	10.4423
Arl5a	12.4563	12.1029	11.8481	11.895	11.1908	11.5996	11.4672	11.4521
Arl5b	8.08954	8.03721	8.48552	8.61299	10.2723	10.6434	10.6546	10.4292
Arl5c	4.35325	4.74611	4.81517	5.40008	4.69439	4.4419	5.11948	4.81433
Arl6	5.7819	6.41433	6.55105	6.54899	6.79329	6.01327	6.63964	6.25905
Arl6ip1	14.4453	15.1605	15.1488	15.0285	14.6399	14.8381	14.8292	14.7968
Arl6ip4	6.35802	6.40511	7.20935	6.79259	6.92774	6.41223	6.8721	6.61812
Arl6ip5	10.7923	11.275	11.2714	11.4933	12.1124	11.8944	12.264	11.9403
Arl6ip6	11.1259	10.1176	10.5488	10.5354	9.64099	9.64615	9.90885	9.51261
Arl8a	13.4123	13.0606	13.0681	13.3858	12.7972	12.8616	12.903	12.8171
Arl8b	13.2959	13.6664	13.7739	13.7382	13.4488	13.6699	13.6309	13.746
Arl9	4.21353	3.95028	3.85728	4.46889	4.00805	3.96656	4.2956	4.11166
Armc1	11.2105	12.3353	12.282	12.0924	11.1063	11.1785	11.4098	11.4881
Armc10	9.42957	10.3161	10.45	9.78224	10.3708	10.7962	10.5812	10.4598
Armc12	4.15457	4.41388	4.72685	3.95841	4.56874	5.51072	4.44692	4.51796
Armc2	6.6403	7.50375	6.93526	6.78177	6.89361	6.56106	6.51524	6.90567
Armc3	3.43646	2.76349	3.0486	3.18439	3.33305	3.80013	3.55061	3.43841
Armc5	7.49672	7.462	7.73443	7.77254	6.83045	7.86658	7.57052	7.48517
Armc6	6.06632	5.81173	6.13395	5.88723	5.15973	5.15557	5.36086	5.61195
Armc7	8.60706	8.41117	8.52602	8.39118	7.79948	8.6364	9.16003	8.62761
Armc8	11.6822	12.5243	12.4607	12.4512	11.9294	12.2381	12.2097	12.1075
Armc9	4.76912	5.59229	5.45332	5.57957	5.69803	4.89252	5.25563	4.59118
Armcx1	6.75942	6.88106	6.69068	6.51356	6.61676	5.67799	6.52345	6.43908
Armcx2	5.57218	5.60296	5.57592	6.09499	5.32073	5.54784	5.73142	5.11911
Armcx3	10.0253	10.6792	10.8061	10.4406	10.4778	9.97542	10.0732	9.97308
Armcx4	5.95558	5.9558	5.45476	5.86896	6.14264	5.37291	5.901	6.05313
Armcx6	4.85909	5.20114	4.96444	5.37018	5.31431	5.2492	5.11544	5.12566
Armh1	3.91176	3.9436	3.98743	3.81207	4.3196	3.91445	4.45892	3.74888
Armh3	10.2866	9.6915	9.85657	9.30531	9.56436	9.5616	9.74646	9.36583
Armh4	5.83669	5.43863	5.06266	5.75262	5.4209	5.13312	5.65275	4.9576
Armt1	9.33263	9.50255	9.89949	9.3696	9.67287	9.10501	9.42602	9.07158
Arnt	10.2762	10.6794	10.6399	10.7251	10.695	11.1313	11.0998	10.8018
Arnt2	7.42111	6.88123	6.80678	7.28514	6.76159	6.85577	6.91501	7.02948
Arpc1a	10.4262	11.4139	11.7474	11.5644	11.4644	11.5101	11.5199	11.4919
Arpc1b	15.9181	16.0823	15.9037	16.0163	15.7741	15.9345	16.0911	16.0817
Arpc2	16.4118	16.5643	16.5964	16.5219	16.4573	16.5286	16.5561	16.532
Arpc3	12.8259	12.8199	12.8585	12.4624	12.8955	13.3602	13.2522	13.1637
Arpc4	13.7116	13.6933	13.6813	14.0003	13.6304	14.4635	14.4738	14.0767
Arpc5	14.3315	14.8633	14.7977	14.7141	14.5376	14.7236	14.7869	14.7013
Arpc5l	8.97927	8.96277	9.03076	8.95182	8.79217	8.5307	8.92882	8.33115
Arpin	12.277	12.8443	12.9939	12.6335	12.291	12.5889	12.8304	12.6965
Arpp19	7.79809	7.62263	7.46416	7.53054	7.47099	7.89916	7.95594	7.20834
Arpp21	5.69422	6.27551	6.39839	6.24688	5.75895	6.30317	6.2917	6.30268
Arr3	4.63484	3.86923	3.90039	4.34983	4.52194	4.15975	4.52803	4.57545
Arrb1	12.0492	12.4831	11.9866	11.4405	11.8514	11.6917	11.8702	11.6384
Arrb2	8.14311	7.96556	7.91759	8.4913	8.24444	8.71418	8.60878	8.49194
Arrdc1	11.3131	11.8945	11.8115	11.8375	11.8059	11.5706	11.7555	11.9196
Arrdc2	4.7282	5.415	5.01801	5.75107	4.65737	4.47793	4.88172	5.07552
Arrdc3	9.67296	10.1763	10.089	10.251	12.5128	10.7168	11.0934	11.5741
Arrdc4	11.4869	11.8034	11.6255	10.2023	12.5082	11.5989	12.0311	12.0428
Arrdc5	4.60209	4.17493	4.52761	4.14173	4.26138	4.30228	4.82777	4.78462
Arsa	5.79153	5.88673	5.68303	6.11934	5.97463	6.51412	5.63251	5.83965
Arsb	9.37629	10.1796	10.0011	9.58801	9.60393	9.79487	9.84569	9.60671
Arsg	5.04523	4.73048	4.60728	4.8804	5.19379	5.13486	4.4504	5.1781
Arsi	3.75856	3.61252	3.46135	3.37263	3.71735	4.26293	3.76458	3.76009
Arsj	5.21273	5.49166	5.61336	5.35807	6.44853	5.34167	5.4637	5.59024
Arsk	8.70079	9.16631	9.02168	9.4757	8.70652	9.12722	8.83264	8.86258
Art1	4.66802	4.58046	4.62359	4.53011	4.85307	4.67175	4.62829	4.49969
Art2a	6.32517	6.83609	6.18823	6.76355	3.94942	5.19848	5.25116	4.78599
Art2b	6.29138	6.61221	6.41801	6.64445	3.86178	4.57605	5.2984	4.87073
Art3	7.42794	7.48276	7.75735	8.42368	8.59487	7.80954	8.09002	8.27606
Art4	4.55132	4.60001	4.83629	4.84285	4.39428	4.27855	4.25495	4.12146
Art5	8.48142	8.2915	8.37703	8.05035	8.55302	7.78883	8.13962	8.723
Artn	3.77855	3.80964	3.71889	3.67286	3.81523	3.31599	3.98201	3.59529
Arv1	7.61141	6.97819	7.07521	7.33058	7.4406	7.57435	8.04906	7.24033
Arvcf	6.85321	6.97949	7.26821	6.98523	6.76968	6.68699	6.62826	6.6978
Arx	5.4161	5.60453	5.65321	4.92329	5.69211	5.22762	5.21367	5.30081
Arxes1	3.63288	3.42498	3.90357	4.07498	3.93384	3.3794	4.57494	3.79725
Arxes2	5.37451	5.45791	4.47101	5.79966	5.49102	5.30429	5.90437	6.04636
As3mt	11.218	12.2556	12.6922	12.6588	12.58	12.3551	12.2884	12.4112
Asah1	14.0524	14.4696	14.5875	14.3914	14.2428	14.3841	14.3663	14.305
Asah2	13.0736	12.564	13.8329	11.9958	11.704	13.2219	11.2052	12.2613
Asap1	14.3253	13.9122	13.7947	14.2853	13.906	13.301	13.8286	13.6483
Asap2	11.5386	11.2554	11.3054	10.6515	10.2452	10.9345	10.6534	10.6099
Asap3	4.21196	4.33322	4.12194	4.07599	4.17169	4.17531	4.48102	4.31815
Asb1	6.28164	6.65094	6.86741	6.69113	6.61333	6.29472	6.44254	6.22772
Asb10	3.96725	3.59018	3.2731	3.63022	3.63968	3.19944	3.58629	3.36021
Asb11	3.81121	4.20744	4.22617	3.84056	4.09157	3.89227	4.27552	4.3444
Asb12	4.80002	4.66649	4.61407	4.29089	4.74301	4.68379	4.46604	5.21712
Asb13	11.4467	10.8622	10.8698	10.8769	10.3606	10.8932	10.7548	10.6503
Asb14	4.4997	4.64636	5.09969	5.24931	4.99264	5.34312	4.86533	5.35052
Asb15	3.16831	3.34642	3.98742	3.68621	3.8007	4.00299	3.70782	3.68151
Asb16	6.47752	6.25776	6.54338	6.06218	6.15849	5.97318	6.23828	6.31987
Asb17	3.715	3.77009	3.91319	3.70571	3.91034	3.67716	4.07922	3.82077
Asb18	4.65208	4.17968	4.07669	3.94241	4.10074	4.08407	3.82597	4.08571
Asb2	10.1328	10.5188	10.5799	10.7297	9.46984	9.07191	9.37953	9.46552
Asb3	8.45809	8.80505	8.533	9.00955	7.66996	7.81735	8.34159	8.13562
Asb4	4.51923	4.59497	4.38867	4.20748	5.05575	4.73834	5.24097	4.93828
Asb5	4.53346	4.61513	4.17274	4.2334	4.47342	4.62895	4.06407	4.25879
Asb6	7.95637	7.82338	7.89202	7.88666	8.08647	8.70069	9.0884	8.5717
Asb7	8.68764	8.49298	8.52141	8.23247	8.22132	8.16308	8.46204	8.19455
Asb8	11.0114	11.3572	11.1194	10.905	11.0568	11.2166	11.3376	11.1618
Asb9	5.13362	4.81595	4.70691	4.70848	5.03022	4.78215	4.75546	4.7815
Ascc1	5.58368	5.60549	5.82763	6.11374	5.81169	5.79239	6.00078	5.7584
Ascc2	10.812	10.2904	10.7189	10.5496	10.3384	10.6944	10.7815	10.6471
Ascc3	11.251	11.5062	11.3887	11.1706	11.1949	11.339	11.4361	11.4178
Ascl1	4.53903	4.34095	4.31269	4.34837	4.17708	3.95173	4.13908	4.03513
Ascl2	4.31286	3.94494	4.51212	4.37566	3.98788	3.51727	3.9716	3.87761
Ascl3	4.47444	4.18446	4.59767	4.48932	4.36163	4.15909	4.03008	4.71511
Ascl4	4.47771	4.38199	4.25943	4.2795	4.4439	4.39999	4.04619	4.4845
Ascl5	5.07205	4.37495	4.21157	4.22424	4.47573	4.73476	4.20613	4.52673
Asf1a	8.78504	9.08889	8.94457	8.86912	9.14108	8.97309	9.17003	8.75506
Asf1b	10.9974	11.2912	11.4769	11.0245	10.5823	10.7509	10.7549	10.4258
Asgr1	5.77816	4.70414	5.0465	4.82859	5.23659	4.51992	4.76071	5.18867
Asgr2	5.66186	5.33301	5.55222	5.63438	5.93561	5.58526	5.49995	5.5751
Ash1l	13.705	13.4266	13.4412	13.6101	12.8669	12.7218	12.9708	12.9708
Ash2l	11.3308	12.0773	11.9637	12.2307	11.8017	11.9586	11.7037	11.7911
Asic1	5.17326	5.08601	5.03731	5.02947	5.05071	4.65475	4.75442	5.09502
Asic2	6.2148	6.16869	5.96884	5.65788	6.63397	5.989	6.08432	5.78788
Asic3	4.08967	3.93733	3.30912	3.89163	3.71861	3.60027	3.6696	3.50443
Asic4	4.35124	4.87166	4.93682	4.53032	5.11623	4.27567	4.79639	4.61628
Asic5	5.01487	4.31261	4.0926	4.73912	4.29112	4.70693	5.08649	4.04274
Asl	7.6765	8.12659	8.41715	7.90439	8.38616	8.64115	8.30257	8.22684
Asmt	6.34708	5.90973	5.94114	5.59304	5.93588	5.98991	5.95758	5.82649
Asns	12.8275	13.5369	13.5432	12.8715	13.644	13.9513	14.0364	13.8904
Asnsd1	11.7263	11.4837	11.7291	11.7644	11.8195	11.943	11.8895	11.7171
Aspa	15.3246	15.7322	16.071	16.3255	15.089	15.1811	14.7816	14.9773
Aspdh	5.1823	5.28827	5.26568	5.14539	5.26185	5.20581	5.46624	5.25656
Aspg	6.0312	6.971	6.98147	6.82183	7.12571	6.68596	6.74792	7.03114
Asph	15.1365	15.7261	15.9466	15.4752	15.9777	15.3172	15.6382	15.7155
Asphd1	4.79391	5.01021	5.35241	4.5311	5.29444	5.21898	5.18093	5.02751
Asphd2	4.79924	4.64137	4.59786	4.64781	4.7764	4.38291	4.8385	4.78416
Aspm	7.88373	8.17816	8.37536	7.45129	7.51505	7.49922	7.48141	7.67544
Aspn	10.977	10.8784	10.5382	10.0783	11.0339	9.86516	10.5428	10.379
Asprv1	5.71696	5.3233	5.62075	5.39458	5.96274	5.8552	5.54373	5.84781
Aspscr1	9.86873	10.595	10.6933	10.7839	9.9242	10.4028	10.5183	10.3819
Asrgl1	6.90408	7.69417	7.91305	7.69354	7.68055	7.5322	7.72931	7.33803
Ass1	7.55179	7.51771	7.11017	7.14603	8.23855	7.49802	8.1549	7.59867
Aste1	9.18045	9.03234	9.54846	9.29275	9.21857	10.2284	9.96842	10.2062
Astl	4.41575	4.34258	4.83818	4.53886	4.74249	4.3751	4.92254	4.78206
Astn1	4.58105	4.46675	4.08371	4.9874	4.54195	4.18261	4.32871	4.42544
Astn2	6.34336	6.57008	6.34739	6.25577	6.32295	6.00444	6.25089	6.27076
Asxl1	9.78694	10.7973	10.4195	10.7043	11.0656	11.3785	11.3306	11.1176
Asxl2	13.3638	13.1372	13.1469	13.1019	12.4174	12.5744	12.3424	12.4836
Asxl3	6.59134	6.79785	6.4251	6.15324	6.52806	5.85146	5.87655	6.45753
Asz1	4.60103	5.53816	5.55392	5.09455	5.26891	5.24711	5.33696	5.54927
Atad1	13.5395	13.0228	13.0243	12.6396	12.7363	12.3179	12.5435	12.5847
Atad2	11.284	11.1017	10.7963	10.5963	9.65714	9.94435	10.3789	10.1093
Atad2b	12.1896	11.6901	11.7242	11.6115	11.2122	11.349	11.2938	11.4132
Atad3a	9.77361	10.5523	10.758	10.57	10.7066	10.5605	10.8441	10.6009
Atad5	7.11728	7.19464	6.88309	6.44475	6.94785	7.33444	7.49568	7.3092
Atat1	10.7075	10.2979	10.3281	10.1719	9.39937	9.17459	8.99762	8.51402
Atcay	4.38227	4.24031	4.60367	4.4406	4.7805	4.30199	4.04597	4.58329
Ate1	11.0277	12.1342	11.8382	11.7367	12.0227	11.5795	11.6591	11.7977
Atf1	9.33924	9.7033	9.60894	10.0184	9.40384	9.76014	10.1056	9.60481
Atf2	13.783	13.8422	13.6637	13.7785	13.3021	13.1919	13.0577	13.2163
Atf3	13.2995	13.1818	11.9746	10.6036	13.5303	13.3043	12.5298	13.0472
Atf4	13.8522	13.8327	13.869	13.8545	14.6707	14.6652	14.6193	14.5254
Atf5	7.25801	6.52865	6.63855	6.24919	6.92162	7.5724	7.20828	6.56991
Atf6	13.0057	13.0513	13.3958	13.3523	13.3724	13.5817	13.6878	13.6049
Atf6b	11.1515	11.9151	11.9154	11.5731	11.5802	11.4895	11.2832	11.8891
Atf7ip	10.7907	10.5791	10.7439	10.3545	9.411	9.73671	9.74771	9.53247
Atf7ip2	6.57056	6.63363	6.14533	6.2282	6.55626	6.02555	5.7933	6.49485
Atg10	8.31805	8.18387	8.21152	8.40321	8.36676	8.45269	8.37708	8.15126
Atg101	6.78833	7.33188	7.54618	7.42921	7.5608	8.01707	8.27546	7.90967
Atg12	10.3546	11.2296	10.9534	10.7165	10.9214	10.6286	10.6519	10.7037
Atg13	7.58908	7.05586	6.61309	6.74271	6.48517	7.24158	6.41848	6.58638
Atg14	6.3932	6.79934	6.57115	6.92771	6.76933	7.5533	6.73605	6.68677
Atg16l1	8.84846	9.38734	9.82972	9.55384	9.45319	9.65737	9.34351	9.55974
Atg16l2	9.26577	10.4433	10.1008	9.43164	11.16	10.0853	9.71808	10.8477
Atg2a	8.48842	8.70689	8.70311	8.7917	8.11289	8.76216	8.6328	8.62802
Atg2b	9.13862	9.19586	9.43387	9.20348	9.19263	9.03641	8.81443	9.06118
Atg3	12.821	12.5232	12.5402	12.6481	12.4515	12.5381	12.6948	12.6643
Atg4a	10.1662	9.99484	10.0412	9.90383	9.4809	9.49927	9.44582	9.75882
Atg4b	10.6111	10.9035	11.0212	10.9764	10.9263	11.043	10.8489	10.8734
Atg4c	9.21921	9.51722	9.90288	9.47775	8.70478	8.81633	8.70372	9.01699
Atg4d	8.8829	9.52979	9.65937	9.50291	8.22628	9.10649	9.02304	8.71719
Atg5	10.5113	10.6135	10.76	10.6114	9.92643	10.2482	10.4252	10.2462
Atg7	7.6906	6.79226	6.50401	6.82864	6.28622	7.95451	7.52183	7.08408
Atg9a	12.7066	12.8162	12.8524	13.0571	12.147	13.0499	12.928	12.5765
Atg9b	4.2578	4.14997	3.87495	3.63243	4.32843	4.12647	3.95788	4.4113
Atic	10.0459	10.685	10.5659	10.5066	10.2121	10.4962	10.7939	10.4435
Atl1	5.94026	5.54118	5.1676	5.03752	5.53841	4.82946	4.50493	4.59782
Atl2	13.8302	13.8699	13.9983	13.8168	13.637	13.9188	13.6781	13.7728
Atl3	10.0319	11.4391	11.4019	11.5784	10.8483	10.6904	10.9198	10.8207
Atm	8.05291	8.30445	8.45412	8.63589	7.15692	7.60543	7.50762	7.2677
Atmin	9.97024	10.6155	9.97395	10.1439	10.0425	10.6318	10.4803	10.0406
Atn1	13.3377	12.0637	11.9861	11.9331	11.3814	11.7609	11.7404	11.8013
Atoh1	10.2561	10.2017	10.3731	9.78418	9.12495	9.49826	9.81442	9.33979
Atoh7	4.21267	3.67088	3.49425	3.21209	3.85294	3.67703	3.59523	3.87231
Atoh8	7.20466	7.08672	7.15933	7.11491	6.72809	7.11151	7.16306	7.11321
Atosa	8.29635	8.60933	8.77751	9.46343	8.53655	8.36523	8.83272	8.54031
Atosb	6.54736	7.01776	6.79655	7.32523	6.6396	6.94707	6.93215	6.86634
Atox1	8.47191	8.60818	9.15834	8.43023	8.90914	9.76231	9.83422	8.74918
Atp10a	7.58408	7.67821	7.80949	8.01031	8.93923	8.32262	8.78124	8.6155
Atp10b	13.9993	13.292	13.5084	12.6216	12.4329	13.0566	13.0565	12.9142
Atp10d	5.36432	6.07036	5.58434	6.33488	6.47047	6.45807	6.37682	6.21021
Atp11a	9.14155	9.0656	8.57191	9.09584	9.10188	8.96017	9.1969	9.25379
Atp11b	12.8731	13.431	13.4081	13.4697	13.427	13.497	13.67	13.5592
Atp11c	11.9478	11.4636	11.6093	11.5526	11.6033	11.3959	11.6139	11.664
Atp12a	4.22958	4.50047	4.44336	4.06469	4.71336	4.42248	4.94143	5.0735
Atp13a1	10.6053	10.9756	11.0829	11.0544	10.8302	11.4838	11.2598	11.0132
Atp13a2	6.81764	6.42788	6.63158	6.75937	6.4961	6.69962	6.63538	6.71265
Atp13a3	12.2038	13.2599	13.1005	12.9486	13.0643	12.8333	13.0644	12.8899
Atp13a4	2.95913	2.89963	3.11794	2.82903	2.90119	3.13947	3.18589	3.37427
Atp13a5	4.27515	3.78137	3.67374	3.8097	4.53808	3.72986	3.59877	3.96961
Atp1a1	15.9188	16.4193	16.7878	17.0107	16.7342	16.8937	16.783	16.8458
Atp1a2	7.47523	8.53657	8.61552	8.45415	8.25063	8.29621	8.63383	8.46485
Atp1a4	3.942	3.84916	3.54606	3.48415	3.83722	3.46451	4.10597	3.56281
Atp1b1	16.7355	17.0051	17.0878	17.2968	16.8116	17.0852	16.9584	17.1137
Atp1b2	6.21717	5.59958	5.75526	6.05569	5.25812	5.96944	5.98479	5.65
Atp1b3	12.3149	12.3215	11.9104	11.9937	13.0515	11.8842	12.2992	12.4337
Atp1b4	4.82749	4.34449	4.34176	4.34298	4.66	4.5412	4.35451	4.48269
Atp23	7.13281	6.96843	6.77353	6.93085	6.1247	6.26439	5.7954	6.17624
Atp2a1	4.1033	3.59059	3.30448	3.11601	3.54827	3.76746	3.40594	3.5564
Atp2a2	14.8967	15.4142	15.5488	15.4309	15.4011	15.2616	15.4604	15.4113
Atp2a3	10.8971	11.4031	11.4578	11.8241	11.1245	11.1958	11.7273	11.414
Atp2b1	13.2957	13.5184	13.6099	14.0536	12.7125	12.847	13.1957	13.0949
Atp2b2	4.13476	4.60342	5.14516	5.06121	4.87523	4.80505	4.46793	5.00007
Atp2b3	4.88013	4.07225	4.09996	4.34019	4.28804	4.27417	4.30062	4.25171
Atp2b4	11.3219	12.3825	12.2715	11.7748	12.7612	11.6353	11.9131	12.3299
Atp2c1	10.9517	12.0339	12.2448	11.757	12.1316	11.6893	11.8372	12.1325
Atp2c2	7.01306	7.14469	7.46109	6.99468	7.47352	8.15062	8.3046	8.01239
Atp4a	6.00275	6.14055	6.19223	5.99538	6.35064	6.23234	6.12202	6.26877
Atp4b	4.09044	4.82992	4.46027	4.33612	4.49504	4.79951	4.62037	4.64255
Atp5f1a	16.2232	16.8279	16.7495	16.5498	16.7939	16.8637	16.8394	16.8057
Atp5f1b	16.2492	16.667	16.6523	16.6382	16.7436	16.7562	16.7768	16.7636
Atp5f1c	15.4038	15.8165	15.7362	15.7703	15.801	15.9989	15.8995	15.8957
Atp5f1d	14.8037	14.4625	14.3952	14.473	14.8109	15.3016	15.2805	14.668
Atp5f1e	8.20837	9.09553	8.94299	8.45872	8.84131	9.18722	9.35352	9.36558
Atp5if1	15.1071	14.9737	14.8341	14.7568	15.3251	15.1828	15.0897	15.0314
Atp5mc1	15.2706	14.4438	14.5257	14.2322	14.6373	14.8553	14.8641	14.5796
Atp5mc2	13.9167	14.3073	14.0337	13.7893	14.6675	14.6667	14.6011	14.1961
Atp5mc3	14.2757	14.6167	14.8415	14.615	14.9266	15.1197	15.0758	14.8617
Atp5me	6.49312	6.1988	6.49029	6.24628	6.3959	7.0426	6.71185	6.52536
Atp5mf	15.1741	15.4299	15.6202	15.3634	15.5283	15.6921	15.7339	15.6256
Atp5mg	11.6121	11.9889	12.4456	11.802	11.9393	12.3194	12.5992	12.1099
Atp5mj	14.6559	15.0641	15.1926	14.7151	15.4953	15.317	15.3689	15.0966
Atp5mk	14.5909	14.7946	14.9331	14.9183	14.8071	15.0324	15.1761	14.9513
Atp5pb	14.8684	15.0489	15.2401	14.7406	14.8911	14.9812	14.9613	14.9812
Atp5pd	16.3837	15.4407	15.6604	15.455	15.8637	15.9097	16.0613	15.6195
Atp5pf	13.3691	13.6472	13.8498	13.705	13.7972	14.13	14.1683	13.804
Atp5po	14.3528	14.3342	14.6022	14.185	14.2363	14.8346	14.8246	14.5242
Atp6ap1	11.368	12.4414	12.0807	12.1435	11.7795	12.3105	12.5191	12.1245
Atp6ap1l	6.38591	6.63264	6.18961	6.52754	6.29179	6.44963	6.42578	6.02745
Atp6ap2	13.9567	14.6089	14.7427	14.3067	14.6539	14.8641	14.8127	14.8228
Atp6v0a1	13.0233	13.4303	13.5406	13.4388	12.7373	13.2785	13.2022	13.0595
Atp6v0a2	13.504	14.0624	14.2216	14.0113	13.2852	13.5584	13.5158	13.5194
Atp6v0a4	4.18457	4.97249	4.80811	4.08438	4.71301	4.46596	4.67238	4.7126
Atp6v0b	8.63804	9.5256	9.68757	9.63538	9.50638	10.0123	9.36946	9.70338
Atp6v0c	15.9823	15.9505	15.8874	15.923	15.8485	16.3906	16.497	16.1168
Atp6v0d1	11.1407	11.773	11.6833	11.8525	11.6713	12.1348	12.1995	11.7661
Atp6v0d2	4.96802	4.47083	4.28107	5.90581	4.58042	4.04132	4.53358	4.34311
Atp6v0e	10.9477	11.0098	11.3104	11.2152	10.4665	11.2748	11.0388	11.0676
Atp6v0e2	8.32277	8.46289	8.49828	8.47259	8.51296	8.64072	8.70461	8.35913
Atp6v1a	9.58462	9.93444	10.1018	9.92918	10.0926	9.95703	10.1237	10.0904
Atp6v1b1	4.56471	4.15436	4.07355	3.7708	4.31694	4.01818	4.66627	4.16468
Atp6v1b2	11.1122	12.2247	12.4556	12.2599	12.5561	12.4579	12.5796	12.4898
Atp6v1c1	11.0144	11.8853	11.6258	11.871	11.4595	11.6253	11.9268	11.6473
Atp6v1c2	4.78928	4.75508	4.85791	4.40771	5.00694	4.72165	4.66231	5.20866
Atp6v1d	10.4402	10.6867	10.8325	11.4339	10.5715	10.7345	10.827	10.4413
Atp6v1e1	11.1408	11.6524	11.9463	11.7676	11.7098	11.9986	12.049	11.6984
Atp6v1e2	8.16088	7.81203	7.93232	7.37422	7.53439	7.98606	7.96865	7.84453
Atp6v1f	10.7076	10.3881	10.3514	10.484	10.6915	10.7809	10.5563	10.735
Atp6v1g1	10.2503	11.0369	11.1853	11.0089	10.8343	10.9623	10.9767	10.691
Atp6v1g2	7.19891	7.08405	7.05794	6.70209	7.09385	6.60557	6.94959	7.29254
Atp6v1g3	5.43646	5.80235	5.9592	5.42492	5.59443	5.59741	5.24095	5.51713
Atp6v1h	11.1606	10.8087	11.1781	11.4161	11.2894	11.5245	11.5726	11.7108
Atp7a	11.1384	10.6047	11.0553	10.4673	9.42009	9.97867	10.2816	10.3829
Atp7b	5.20818	5.20069	5.63294	5.75837	6.51162	5.96487	6.02001	6.37336
ATP8	16.2129	17.3862	17.338	17.5868	17.6918	17.6964	16.4776	17.4754
Atp8a1	10.7999	11.0362	10.9485	10.6323	11.3699	12.3729	11.7376	11.9613
Atp8a2	7.43642	7.23154	7.61339	7.32697	7.13481	7.56493	7.85816	7.62133
Atp8b1	15.6747	15.9092	16.1381	15.7338	15.0507	15.5939	15.4896	15.5139
Atp8b2	8.22895	8.09134	7.87576	7.82649	7.97003	7.79213	8.19434	8.37954
Atp8b3	6.73944	6.76361	6.62188	5.71725	6.85684	6.71298	6.05273	6.74351
Atp8b4	4.41199	4.88828	4.55809	5.16419	5.37785	4.92886	4.97415	4.16163
Atp8b5	4.09079	4.47967	4.20174	4.12892	4.22088	3.95685	4.48562	3.79879
Atp9a	10.0945	11.5222	11.6098	11.3839	10.8852	11.4401	11.4515	11.3461
Atp9b	9.66132	10.8165	10.7983	10.9308	11.3424	10.8175	11.0603	10.9898
Atpaf1	10.6496	10.4631	10.7521	10.633	10.6316	10.3351	10.4318	10.7462
Atpaf2	8.4044	8.37902	8.52812	8.44554	8.75038	9.05794	9.12898	8.50379
Atpsckmt	7.17583	7.50249	7.37133	7.04937	6.67155	6.70913	7.02039	6.78575
Atr	8.14111	7.95585	7.3577	7.53532	7.80401	6.96009	7.06145	7.5323
Atraid	10.3279	11.2444	11.0103	11.4697	11.3764	11.4885	11.3065	11.2537
Atrn	10.8926	11.4184	11.5849	11.5328	10.7881	11.1643	11.1899	11.3039
Atrnl1	12.7938	13.2618	13.1215	13.3031	13.2503	12.829	12.8354	12.9332
Atrx	13.2058	13.4855	13.573	13.5772	13.5881	13.5055	13.5922	13.335
Atxn1	12.1237	11.7721	11.8614	12.1483	11.119	11.5644	11.3425	11.3777
Atxn10	9.5939	10.4887	10.369	10.8737	10.9758	10.3639	10.6272	10.5295
Atxn1l	8.64186	8.63574	8.80774	8.29959	8.91201	8.84835	8.70458	8.81222
Atxn2	14.2022	12.9671	12.9813	12.9191	13.2514	13.168	13.0446	13.0008
Atxn2l	13.2851	13.4508	13.341	13.4664	13.2695	13.5393	13.3006	13.3358
Atxn3	10.6906	11.3086	11.2437	11.1303	11.5987	11.3542	11.142	11.5021
Atxn7	10.9817	10.3105	10.3129	10.2142	10.2199	10.2688	10.2584	10.0585
Atxn7l1	12.2069	11.3453	10.9859	11.5362	11.1993	11.1092	11.225	11.0421
Atxn7l2	5.56926	5.7643	6.04876	5.8322	5.80352	5.76069	5.61242	5.75166
Atxn7l3	7.74551	8.42879	8.24853	8.53557	8.30806	8.30153	8.51403	8.31593
Atxn7l3b	11.129	11.7084	11.8881	11.7029	10.9958	11.6998	11.3647	11.2375
AU015228	5.85573	5.23536	5.40697	5.25232	5.69718	5.33483	5.29453	5.44541
AU015836	3.70885	3.10367	3.21617	2.977	3.48312	3.18404	3.22798	3.13308
AU016765	4.50075	4.81518	4.78038	4.27798	5.00973	4.55004	4.95438	4.79715
AU018091	4.20306	4.39416	3.81663	3.67101	3.97384	4.17471	3.83222	4.18944
AU021063	2.85226	2.93937	2.85511	2.67315	2.80342	2.69862	2.73458	2.74491
AU021092	5.4379	6.03694	5.38027	5.78664	5.62016	6.2455	6.10506	6.20578
AU022252	8.15501	8.88391	8.31493	8.45565	8.17693	8.05283	8.13083	8.28742
AU040320	13.0061	12.6626	12.8471	12.5873	11.6916	12.8975	12.6903	12.4073
AU040972	4.67384	4.08801	4.01684	4.01934	4.38811	4.00011	4.18329	4.43856
AU041133	7.15546	7.02198	6.80441	6.65901	6.07117	6.11872	6.43108	6.46579
Auh	9.18464	9.86018	9.87344	9.61904	10.4164	10.0097	9.87156	9.93614
Aunip	4.63273	4.8569	4.57274	4.20964	4.73892	4.55001	4.68918	4.65439
Aup1	9.50935	9.23589	9.07432	9.37681	8.80473	9.67564	9.79765	9.25541
Aurka	8.53341	8.32392	8.43141	7.84185	8.19646	8.23742	8.16453	8.20757
Aurkaip1	10.2658	11.8159	11.8601	11.9051	11.4628	11.8477	12.0361	11.7634
Aurkb	10.426	11.5586	11.6835	11.1611	11.2141	11.4084	11.0903	11.3923
Aurkc	5.67172	5.10308	5.0087	4.98659	5.23918	5.03613	5.28357	4.79255
Aven	9.10299	9.91453	10.2161	9.83606	9.96174	10.0864	10.407	10.329
Avil	5.13942	5.85561	5.56016	5.71148	6.31429	6.41065	5.0272	5.8064
Avl9	11.6234	12.4637	12.5775	12.5472	12.0789	12.5386	12.453	12.3206
Avp	6.06771	5.17526	5.5618	5.50003	5.93484	5.53196	5.69732	5.5839
Avpi1	6.0899	5.91493	6.35309	6.18836	7.10351	6.90606	7.07799	6.79073
Avpr1a	6.67615	5.78494	5.2673	5.54248	8.51975	7.54439	7.56022	7.50601
Avpr1b	3.72527	3.04508	3.24128	3.59662	3.21367	3.59267	3.21777	3.43035
Avpr2	3.02017	3.25233	3.42158	2.9989	3.44008	3.18905	3.51075	3.41959
AW011738	4.87871	5.01549	4.79032	5.01479	4.7848	4.16826	4.633	4.69525
AW112010	11.3031	11.655	11.6466	11.6751	11.5649	11.7517	11.7398	11.6815
AW146154	9.38755	9.64451	9.71977	9.70905	8.85845	8.08253	8.17029	8.60456
AW209491	7.5969	7.5718	7.88174	8.03188	8.16267	6.99635	7.42511	7.09382
AW551984	6.58332	6.74557	6.90216	6.45078	7.32779	6.07443	6.91307	7.0565
AW554918	8.1664	8.08878	7.73865	8.02505	7.3079	6.70943	7.15184	7.19601
Awat1	3.31689	3.43327	3.8178	3.3256	3.46494	3.38141	3.52379	3.33914
Awat2	5.35007	5.52955	5.75978	5.67751	5.84291	5.46663	5.78813	5.33895
Axin1	9.34789	9.98387	10.1589	10.5019	10.3516	10.0999	10.0763	10.3322
Axin2	11.4119	11.8993	12.555	11.6934	10.249	10.1913	10.2328	10.0935
Axl	9.50084	9.59904	9.98657	10.2996	11.6435	10.9992	11.3114	11.5104
AY074887	4.86263	5.0471	5.00066	4.9714	5.62321	5.09396	5.3041	5.3882
AY358078	7.14281	7.87383	8.03989	6.88131	7.58413	7.46607	7.3	7.48504
AY761185	6.28341	6.05445	6.43327	6.27101	6.41519	6.33408	6.3273	6.47459
Aym1	5.19963	4.72004	4.39908	4.40022	4.59688	4.57736	4.12615	4.21686
Azgp1	3.99735	3.69669	3.80147	3.66383	3.74905	3.69983	3.55867	3.83255
Azi2	13.275	13.4321	13.3897	13.3995	12.5586	13.1209	12.91	13.0406
Azin1	14.5713	15.5611	15.7093	15.7837	15.8024	15.6083	15.6227	15.5991
Azin2	4.78117	4.8901	4.33236	4.75515	4.93546	4.8485	4.81162	5.46275
B020004C17Rik	5.961	5.62009	5.45641	6.04802	5.6599	5.69755	5.61122	6.04507
B130006D01Rik	6.96997	7.67944	7.48735	7.79336	7.70162	7.80017	7.44651	7.61465
B130024G19Rik	5.79927	6.00963	5.95987	6.3186	5.59452	5.68307	5.58215	5.2377
B230206H07Rik	7.10323	6.7231	6.95814	6.65734	6.74456	6.77656	6.58173	7.24544
B230217C12Rik	6.0385	5.25167	5.28328	5.28176	5.14138	4.66143	5.0016	4.85093
B230219D22Rik	10.7064	10.6617	10.5783	10.5233	10.6338	10.273	10.3232	10.3345
B2m	18.0576	18.1872	18.3088	18.1301	18.1557	18.1763	18.2028	18.1503
B3galnt1	6.03903	7.19045	7.05089	6.9047	6.54883	5.4723	6.07579	6.22564
B3galnt2	9.86379	10.8466	10.9026	10.5944	10.5452	10.052	10.2439	10.2974
B3galt1	6.41125	7.26595	6.77254	6.71989	7.06341	6.9912	6.98699	6.81089
B3galt2	4.69659	6.68726	5.39011	5.45742	5.01848	4.89575	5.51152	5.49443
B3galt4	6.32261	6.94118	7.16898	6.47306	5.79991	6.38858	6.54383	6.44877
B3galt5	8.38529	8.24734	8.54228	6.74207	6.78919	8.61333	8.75384	8.63897
B3galt6	5.59963	6.00222	6.2524	5.97724	5.8104	5.87234	5.85672	5.64739
B3gat1	2.98144	2.93638	3.07227	3.08544	3.22009	2.96658	2.8485	2.85222
B3gat2	5.38483	5.22358	4.64081	5.03352	4.96024	4.85144	5.06899	5.02274
B3gat3	6.83825	6.13622	6.23618	6.08422	5.88162	5.89007	6.22353	5.33462
B3glct	10.3895	9.86258	10.0442	9.35305	8.88288	10.1663	9.99614	9.54292
B3gnt2	10.541	11.5592	11.3331	11.2892	12.1876	11.4594	11.5025	11.4639
B3gnt3	14.1328	14.3138	14.354	14.2626	13.5335	14.4293	14.3149	14.0983
B3gnt4	4.39684	4.46537	4.04601	3.90018	4.33097	4.49209	3.99536	4.17018
B3gnt5	9.07577	9.76119	9.03213	9.38641	8.93106	8.87712	9.52906	9.14259
B3gnt6	6.29536	5.41562	4.9832	5.65265	5.77876	5.48172	5.31557	5.4442
B3gnt7	13.2869	11.9399	12.086	9.67649	9.8467	12.3788	12.3312	11.7855
B3gnt8	8.09808	8.48028	8.12153	8.17457	8.49155	7.94869	8.06775	8.17378
B3gnt9	4.45236	4.25158	4.14714	4.43801	4.46174	4.2145	4.11596	4.50278
B3gntl1	8.8338	8.33197	8.15602	8.43101	8.15478	7.65653	7.79453	8.04217
B4galnt1	13.5081	12.7342	12.9773	13.3653	12.4656	14.0506	13.8114	13.3168
B4galnt2	16.1371	16.5281	16.4388	16.4598	15.9842	16.0802	16.1127	16.1997
B4galnt3	8.85227	8.47997	8.22899	8.04881	7.77517	7.59666	7.49437	7.77588
B4galnt4	6.1581	6.09258	6.83099	7.02542	8.0865	6.84751	6.59433	7.05712
B4galt1	15.0735	15.2927	15.2426	14.6786	14.9544	15.3265	15.3041	15.3712
B4galt2	6.65567	6.81834	6.32204	6.71693	6.43351	6.01809	6.2406	6.29709
B4galt3	9.82398	10.5568	10.556	10.3256	10.9574	11.5148	11.2325	11.4996
B4galt4	9.87456	10.2109	10.0747	9.11589	9.44374	8.63184	8.94912	8.84524
B4galt5	12.0797	11.3569	11.938	12.495	12.4372	11.9872	12.0933	12.2747
B4galt6	12.5462	12.5408	13.1633	13.6593	13.9465	13.865	14.0391	13.9848
B4galt7	7.09183	7.33003	7.2	7.18368	7.17026	7.26118	7.27544	7.29498
B630019K06Rik	6.18989	6.26412	6.31888	6.18928	6.57656	6.23338	6.48353	6.37869
B9d1	6.26171	5.89006	6.03599	5.92093	6.15614	5.76645	5.02904	5.52355
B9d2	6.11024	5.86195	5.8669	6.36069	5.79128	5.84322	5.76974	5.598
Baalc	5.399	4.52759	4.53827	4.48158	4.98115	4.57748	4.6922	4.16083
Baat	5.82036	6.11057	6.19411	6.86336	5.77503	5.74966	5.69003	5.98951
Babam1	11.7046	11.3669	11.5767	11.2306	11.1345	11.5611	11.6468	11.4154
Babam2	13.2732	13.6387	13.5762	13.8167	13.7088	13.8579	13.5817	13.4672
Bace1	7.34568	7.55072	7.46298	7.8146	8.05322	7.40407	7.37427	7.63656
Bace2	8.27946	8.3561	8.39374	8.38958	8.85464	9.17934	9.12216	8.6018
Bach1	12.452	12.4596	12.917	12.9558	13.5461	13.4808	13.6343	13.6496
Bach2	7.63265	9.10879	8.16606	9.08122	8.40359	8.26189	8.48324	8.48317
Bad	7.31638	7.39074	7.5823	7.88154	7.04889	7.05456	7.21568	6.9491
Bag1	11.7562	11.8844	12.2026	11.9314	12.1766	12.1142	12.0639	12.0512
Bag2	7.10032	7.47628	7.15807	7.00392	8.95407	7.90581	8.31937	8.38021
Bag3	10.2213	8.59933	8.91756	8.57402	10.7159	11.0188	11.3852	10.2468
Bag4	8.32522	7.94148	8.29441	8.28333	7.34386	7.58169	7.91149	7.46614
Bag5	10.3392	10.4086	10.9299	10.7302	11.0701	10.7828	10.9638	10.9262
Bag6	10.7908	10.8218	11.0176	11.0299	11.0457	11.3719	11.6336	11.2159
Bahcc1	5.16686	4.58791	4.59574	4.70678	4.24906	4.1526	4.26857	4.06493
Bahd1	6.97844	7.20204	7.46261	7.24595	7.41916	7.36649	7.74321	7.73487
Baiap2	5.58244	6.14348	6.04668	6.37152	9.27946	7.9368	8.92276	8.73822
Baiap2l1	13.2358	13.2598	13.0428	12.0409	13.0845	13.4465	13.3364	13.1306
Baiap2l2	12.5449	13.2167	13.3825	13.4238	13.1324	13.0077	12.7835	12.8665
Baiap3	3.427	3.5339	3.42262	3.50746	3.4991	3.22089	3.49224	3.35227
Bak1	12.357	11.6628	12.0765	11.3969	10.9412	11.7972	11.7345	11.08
Bambi	6.60988	6.74382	6.90871	6.94319	6.60356	6.60597	6.56525	6.40279
Banf1	12.862	12.3836	12.0778	11.9811	12.9693	13.1778	13.0835	12.3463
Banf2	4.25103	3.97321	3.872	3.82049	3.96473	3.75595	3.82283	3.89732
Bank1	8.28511	10.517	7.70915	11.8329	7.39185	7.0748	6.98081	6.77031
Banp	9.99191	10.0697	11.0608	10.5179	9.26692	8.84404	8.63384	9.18886
Bap1	7.54977	8.30978	8.48346	8.56657	8.73676	8.83644	8.82534	8.81493
Bard1	7.44904	7.74321	7.50669	7.40719	7.53496	7.62471	7.58322	7.67229
Barhl1	4.41757	4.24834	3.98626	3.8558	4.43636	4.09826	4.22014	4.37788
Barhl2	6.81081	6.19606	6.0564	5.98958	6.14271	6.55157	6.14003	6.36107
Barx1	5.66686	5.79758	5.59479	5.61531	6.00791	5.74068	5.82948	5.55108
Barx2	8.35465	8.32557	8.77148	7.46796	7.76939	8.43517	7.95022	8.1409
Basp1	5.76483	5.27653	5.85958	5.65755	5.79908	5.6032	5.65163	5.26129
Batf	8.95133	7.63486	7.53322	7.861	8.80242	8.03323	8.31996	8.62924
Batf2	11.0418	9.86507	10.3032	9.08635	7.48829	8.31436	8.22765	7.74817
Batf3	7.19089	6.53579	6.49591	6.10819	6.57905	6.7834	6.67312	6.32177
Bax	9.40629	9.6049	9.87687	9.37431	9.31054	9.56327	9.49597	9.52537
Baz1a	10.3728	11.4821	11.205	11.2027	11.7512	11.4202	11.4817	11.6101
Baz1b	11.9232	12.3871	12.6117	12.7087	11.5639	11.3906	11.6687	11.6138
Baz2a	12.0736	12.1817	12.1384	11.8872	11.6603	11.7384	11.4409	11.5357
Baz2b	12.8217	12.7923	12.5116	12.5544	12.3802	12.6862	12.6036	12.8061
BB014433	4.13581	3.9757	3.968	3.63807	3.76063	3.62468	3.8425	3.66157
BB019430	2.94996	3.45189	3.4309	3.5178	3.19148	3.44365	3.25229	3.12146
Bbc3	6.1151	5.71131	6.25262	5.78559	6.06909	5.85288	5.85065	5.84719
Bbip1	9.0227	8.80186	9.14875	8.54433	9.28991	8.91925	9.08494	8.92082
Bbln	9.18639	8.61557	8.33057	8.49854	8.12326	9.20323	8.89906	8.1189
Bbof1	7.12628	5.92494	6.18486	5.86856	6.24881	6.27587	5.69059	6.3191
Bbox1	5.60466	4.87369	5.54388	4.74477	6.65	5.64863	5.34835	5.52346
Bbs1	6.1992	5.77627	5.58207	5.82929	5.90537	5.52189	5.93703	5.91836
Bbs10	4.68163	4.84497	4.49648	4.49449	4.62093	4.04881	4.21784	4.23059
Bbs12	4.12084	4.43665	4.48302	4.2909	5.30575	4.32986	4.39395	4.31999
Bbs2	7.07782	7.56037	7.24185	7.75735	7.39634	7.41552	7.29078	7.04651
Bbs4	7.17237	7.75135	7.8771	7.58419	9.00476	8.49822	8.48589	8.70846
Bbs5	4.78461	5.20639	5.11839	4.93583	5.47682	4.97741	5.11468	4.94191
Bbs7	6.47929	7.03354	6.82368	7.31095	6.79901	6.88307	6.59366	6.94924
Bbs9	7.81751	7.90601	8.04908	8.2571	7.46738	7.52997	7.57301	7.19367
Bbx	8.96925	9.2167	9.11442	9.32908	9.45924	8.98602	9.29409	9.40122
BC004004	12.3975	12.7434	12.8184	12.7467	12.5457	12.269	12.2357	12.7727
BC005537	15.8806	16.1423	16.2143	16.2042	16.3741	15.8859	16.0169	15.951
BC005624	11.2	11.8366	11.6374	11.4023	11.3626	11.483	11.2187	11.2904
BC006965	5.24606	4.45545	5.18962	4.9401	4.28629	5.06121	4.22787	4.61649
BC016579	11.1456	11.051	10.2034	9.74944	11.3742	11.3452	11.3574	11.2345
BC021767	10.4087	10.9742	11.0103	10.9298	11.0723	11.1181	10.715	11.1273
BC024139	4.42488	4.0117	3.96525	4.10332	4.12894	4.01158	4.08144	4.16804
BC025920	6.4344	6.11729	6.16634	6.24288	6.15949	6.07945	5.96722	5.97283
BC028528	7.39532	7.5858	7.10201	7.76618	7.47464	7.0697	7.07148	6.75487
BC030500	6.42452	6.6113	6.64864	6.32195	6.70755	6.37225	6.7158	6.53153
BC031181	8.98309	9.28286	9.53075	9.30255	8.75354	9.15636	9.09572	8.97275
BC035044	6.89466	7.94998	7.01211	8.08928	6.70535	6.86177	6.74751	7.00026
BC048507	4.5706	3.94757	3.79802	3.64218	3.89398	4.26136	4.47903	3.60408
BC048562	4.33334	3.64384	3.85392	3.60322	3.45678	3.53445	3.48692	3.56788
BC048644	3.13855	3.22392	3.17025	3.11696	3.12243	3.06599	3.21182	3.03651
BC048671	5.0399	5.00707	4.56114	5.04867	4.86835	4.94294	4.65291	4.69118
BC048679	5.91777	6.55589	6.6587	6.35163	6.38406	6.08565	6.38959	6.40481
BC049715	4.84379	5.02385	4.90936	4.67238	4.6824	4.56998	4.68669	4.79852
BC051019	3.88483	4.15265	4.27688	4.42793	4.82494	4.43403	4.52765	4.41889
BC051665	3.61849	3.32573	3.3564	3.31451	3.58148	3.27503	3.17572	3.34546
BC061195	5.63699	5.02717	4.58701	5.19347	4.85541	4.64499	4.80166	4.95494
BC061237	4.35836	3.83472	4.23755	4.62843	4.38698	4.25056	4.38112	4.42658
BC065397	5.42275	6.2199	6.46201	5.39469	5.82056	5.57456	5.64658	6.06921
BC107364	5.22637	5.05582	4.6286	4.44803	4.89127	4.74592	4.89893	4.84878
Bcam	8.12099	8.54875	8.43921	8.24876	8.81821	8.4236	8.86725	8.48729
Bcan	2.90696	2.97736	2.85237	3.13818	3.49359	2.95713	3.13731	3.3416
Bcap29	10.5794	9.93942	9.76418	10.0634	10.5776	9.97699	10.2126	10.3599
Bcap31	13.5892	14.2639	14.2906	14.0801	14.2684	14.3287	14.1893	14.2165
Bcar1	12.8641	11.8621	11.7041	11.8436	11.3715	12.6932	12.4805	12.0551
Bcar3	10.6292	10.7935	10.5371	11.3013	11.3946	12.0521	11.9806	11.7746
Bcas1	11.1702	10.9525	10.4445	10.7935	10.6704	10.3106	10.5441	10.7691
Bcas2	9.87403	9.60983	9.57507	9.5903	9.69554	9.62809	9.53381	9.34162
Bcas3	7.64872	6.36296	6.66353	6.87999	7.20989	7.83653	7.36454	6.89551
Bcat1	6.16915	6.53683	6.29518	6.40096	6.36016	6.6563	6.02664	5.90648
Bcat2	7.3356	8.0767	7.92895	7.91121	7.8097	7.66954	7.81348	7.61674
Bccip	10.5795	10.6208	10.6199	10.1502	10.5387	10.2986	10.4764	10.2213
Bcdin3d	5.53642	6.08623	5.88453	5.8316	5.9824	5.8888	5.76898	5.98175
Bche	9.69969	9.59706	9.54438	10.3964	10.7707	10.1876	9.78158	10.26
Bckdha	6.8895	6.5938	6.65324	6.83353	6.68661	7.40988	7.32795	7.34495
Bckdhb	6.59891	7.50958	7.69096	7.63866	7.78522	7.19195	7.48011	7.14401
Bckdk	8.52552	9.31662	9.31722	9.44481	9.17577	8.90643	9.24357	9.02352
Bcl10	8.03658	8.13821	8.47407	7.81188	8.52566	8.58394	8.7201	8.49986
Bcl11a	8.0914	8.70664	8.10539	9.21973	7.55276	7.63242	7.35512	7.51318
Bcl11b	7.01819	7.46032	8.00965	8.02868	5.41822	5.92212	5.59387	5.82742
Bcl2	10.4761	10.5518	10.2351	11.0702	10.2196	9.74338	9.83663	9.75164
Bcl2a1a	7.53921	7.87896	7.63421	8.40437	9.29103	8.74061	8.83948	8.85306
Bcl2a1b	7.54958	8.49449	7.93778	9.05326	9.56485	9.28016	9.3748	9.22769
Bcl2a1c	6.65175	7.00103	6.48598	7.09985	7.52642	7.45616	7.71895	7.26962
Bcl2a1d	6.65695	7.13205	6.71573	7.64387	8.22899	8.00061	8.11061	7.88087
Bcl2l1	9.07383	10.3996	10.7162	11.1187	11.1236	11.5733	11.4653	11.3041
Bcl2l10	3.70508	3.66503	3.49116	3.55398	3.9698	3.92441	3.77493	3.92112
Bcl2l11	6.47511	6.99829	6.73141	6.91528	9.16395	9.0052	8.98367	8.4367
Bcl2l12	5.37893	5.01294	5.14171	5.65847	4.5145	4.78035	4.74994	4.80887
Bcl2l13	7.49566	8.71655	8.94852	8.70125	9.01526	9.26735	9.21611	9.26612
Bcl2l14	6.84878	7.01293	7.04706	6.62898	7.97633	7.88265	7.82218	7.83225
Bcl2l15	13.8782	14.301	14.3985	14.1006	12.6423	14.3629	14.3234	14.0199
Bcl2l2	9.14919	9.11695	9.32404	9.3886	9.01272	8.80722	8.86261	9.10093
Bcl3	12.7269	11.6426	11.91	10.8989	12.7038	13.1657	13.294	12.6819
Bcl6	7.39787	7.43252	7.02861	7.27623	7.82437	7.58603	7.35663	7.67511
Bcl6b	5.8028	5.83421	6.05386	6.12968	6.31335	6.61115	6.55187	6.07893
Bcl7a	9.1752	9.29562	9.28517	9.56979	8.17552	8.25543	7.6631	7.945
Bcl7b	7.6095	7.94386	7.88405	7.72069	7.88328	8.19717	8.16046	7.78295
Bcl7c	6.77742	5.99674	6.4525	6.65639	6.49187	7.1107	6.76209	6.73931
Bcl9	11.4355	11.0133	10.8366	10.3022	9.31037	10.166	10.295	9.53406
Bcl9l	9.30065	9.7118	9.45383	9.6477	8.76874	9.03589	8.47767	8.56032
Bclaf1	13.5476	12.5645	12.8106	12.6352	12.989	12.6733	12.6565	12.7105
Bclaf3	10.5623	10.7042	10.8936	10.9289	10.3532	10.3057	10.5249	10.446
Bco1	6.99527	8.12931	8.19159	9.8071	7.91901	7.21567	8.55889	8.06232
Bco2	9.91243	9.89897	10.2659	9.76218	9.14773	9.99829	9.09849	9.2946
Bcor	7.48248	8.11316	8.09082	8.13397	8.47403	8.54617	8.62741	8.52498
Bcorl1	9.91843	9.52174	9.92845	9.80843	9.38712	9.01898	8.86812	9.12138
Bcr	10.4658	10.1309	10.2039	10.606	11.4267	11.6667	11.4635	11.2338
Bcs1l	8.48503	8.66807	8.71499	8.31779	8.11603	7.88417	8.45997	8.03579
Bdh1	11.2351	11.66	11.4979	11.1056	11.5791	11.5898	11.4516	11.5541
Bdh2	4.91513	5.18505	5.42942	5.5087	5.20299	5.1742	5.3783	5.45623
Bdkrb1	6.92769	6.95034	6.78425	7.76809	9.59034	8.66761	8.87406	8.91886
Bdkrb2	7.08181	6.65464	7.40579	7.51532	8.11037	8.16918	8.61816	8.3363
Bdnf	3.01402	3.55467	3.31109	3.56837	4.08442	3.53072	3.38305	4.13836
Bdp1	11.1827	10.6123	10.6075	10.6748	10.5559	10.1107	10.028	9.89137
Bean1	7.16293	6.89056	6.85308	6.58521	6.82782	6.53934	6.67401	6.90851
Becn1	10.8124	11.1794	11.0422	10.9215	10.7857	11.2787	11.2651	11.0267
Begain	5.92887	6.19684	5.78724	5.85164	5.90728	6.36523	6.12939	6.11842
Bend3	8.57684	8.22549	8.1351	8.16842	8.11197	8.57292	8.14612	8.4222
Bend4	5.50597	6.22457	6.20196	6.36496	6.19084	5.87815	5.83254	5.95451
Bend5	7.51376	7.78278	7.57976	7.72036	7.03157	7.00369	7.31321	7.17228
Bend6	2.98208	3.37043	3.5877	3.17868	2.93482	3.81456	3.19772	3.16627
Bend7	13.4359	13.1733	13.1643	12.8654	11.0662	12.3968	12.1195	12.2012
Best1	5.56904	5.58666	5.49765	5.30879	5.77413	5.49275	5.0617	4.98661
Best2	3.91816	3.05734	3.08074	3.03647	3.12318	2.81996	3.41763	2.84928
Best3	4.28376	3.8509	3.85621	3.58957	3.74828	3.81939	3.90996	3.99689
Bet1	8.85888	9.25729	9.1709	8.62036	8.82497	8.71511	8.92462	8.38686
Bet1l	6.27269	6.75518	6.89203	6.78374	6.65388	7.52187	7.27414	7.15504
Bex1	9.75051	9.62124	9.47276	10.0275	10.3226	8.88851	9.6496	9.79111
Bex2	7.4701	7.35869	7.23309	6.91969	8.25801	7.11576	7.37379	7.08627
Bex3	9.53993	9.14967	9.22983	9.02878	10.4553	9.40782	9.79971	9.81935
Bex4	5.19479	5.96652	5.49861	5.66558	6.09847	4.87266	5.26323	5.61204
Bex6	3.86385	3.98638	4.28656	3.80347	4.40449	3.94071	3.8206	3.92276
Bfar	11.3296	11.5231	11.4754	11.3587	11.0269	11.1363	11.4751	11.3089
Bfsp1	5.21102	5.48008	6.13612	5.48665	6.61176	6.02509	5.91735	6.31053
Bfsp2	4.30998	4.48648	3.74817	4.74898	4.04171	3.8873	4.08495	4.24038
Bglap	6.60688	5.77339	5.87893	6.05259	5.94925	5.97939	6.09772	5.94705
Bglap2	6.90575	6.18614	6.11766	6.24836	5.86427	6.37875	6.24298	6.14187
Bglap3	7.47858	5.96939	6.59146	6.19823	6.04773	6.11423	6.15979	5.64592
Bgn	14.0615	13.0625	12.6232	12.8859	12.8946	13.4308	13.5912	13.0272
Bhlha15	8.81535	7.87781	8.49534	7.90462	6.42369	7.05683	7.05241	6.96217
Bhlha9	5.95747	5.92139	5.95623	5.652	5.7974	5.47155	5.85599	5.9205
Bhlhb9	6.2025	6.52834	6.16578	6.32685	6.63618	5.91739	5.99954	6.27303
Bhlhe22	4.62006	4.56291	4.40048	4.30228	4.49969	4.68818	5.02503	4.79779
Bhlhe23	2.84721	2.74837	2.8782	2.79235	2.95861	2.86089	2.73397	2.79483
Bhlhe40	13.6287	13.4266	13.8065	14.0088	15.264	14.6054	14.456	14.681
Bhlhe41	6.16297	7.36531	7.79985	8.37153	7.59678	6.94163	7.42244	7.54609
Bhmt	6.7969	7.34556	6.82571	5.65655	5.46551	7.06416	6.16197	6.25962
Bhmt2	5.34978	5.24575	5.27464	4.83792	5.3619	4.67825	5.17724	5.22795
Bicc1	8.51305	9.03576	8.54523	8.78439	9.12877	8.91296	8.99038	9.10545
Bicd1	9.21964	9.63111	9.66366	9.70477	9.67317	8.91659	9.10445	9.28917
Bicd2	6.68241	7.55525	7.01471	7.10963	7.17044	6.72908	7.07332	6.76793
Bicdl1	8.87217	9.59433	9.82802	9.79922	9.82298	9.29081	9.71751	9.51086
Bicdl2	8.86309	8.63247	8.26035	8.60272	8.91478	8.67255	8.68729	8.81828
Bicra	10.7465	9.18047	9.37138	9.47065	8.89301	9.21458	9.12729	9.14792
Bicral	9.72404	10.626	10.4185	10.6176	9.72447	10.3235	10.0385	10.3703
Bid	5.95287	6.83841	6.42726	6.09748	5.90549	5.03527	5.35238	5.522
[truncated: 18,849 more rows]

## Sheet: Original grouping
	GSM2539097	GSM2539098	GSM2539099	GSM2539100	GSM2539101	GSM2539102	GSM2539103	GSM2539104	GSM2539105	GSM2539106	GSM2539107	GSM2539108	GSM2539109	GSM2539110	GSM2539111	GSM2539112	GSM2539113	GSM2539114	GSM2539115	GSM2539116	GSM2539117	GSM2539118	GSM2539119	GSM2539120
0610009L18Rik	9.69194	10.6771	10.5632	10.5566	10.3973	10.3646	10.3476	10.7006	10.8193	10.4572	10.436	10.7041	10.7697	10.3298	10.6216	10.5113	10.6432	10.6592	10.9067	10.6013	10.6696	10.2055	10.7454	10.7051
0610010K14Rik	7.13821	6.64761	5.9191	5.75886	6.89514	6.34414	5.96763	6.9214	6.67528	7.01865	6.9762	6.38991	5.94955	6.48423	6.68039	6.61608	7.05815	5.84201	5.87619	6.29203	6.10153	6.14778	6.53325	5.97224
0610030E20Rik	8.62388	9.03043	8.90678	8.82804	8.94987	9.0604	8.53401	8.97853	8.09864	8.43182	8.44673	8.05027	8.40786	8.49785	7.84079	8.44428	8.84028	8.82383	8.34651	9.28505	8.3711	8.4597	8.60711	8.43342
0610040J01Rik	7.22041	7.93262	8.0817	8.01308	8.22	8.34835	7.89254	7.64892	8.03046	8.45902	8.28738	8.32975	8.30926	8.08539	8.81531	8.44321	7.88214	8.6676	7.78616	8.3638	7.36484	8.03816	8.14631	7.61596
1110002E22Rik	5.39479	5.12951	4.93307	5.20704	5.76803	5.4697	6.02182	5.09635	5.39199	5.40925	6.13616	5.53718	5.4034	5.19807	4.99127	5.60149	3.98274	5.23535	6.08917	5.72104	5.9238	5.14612	4.81391	4.90584
1110002L01Rik	6.56391	6.65717	6.48979	6.59874	6.6871	6.35696	5.99103	7.00996	5.7608	5.5645	5.84387	5.57221	5.72717	5.58325	5.88956	5.7207	6.27093	6.0035	6.22893	6.58702	6.87977	6.3546	6.17712	6.6609
1110004F10Rik	10.8675	11.1325	11.4156	11.1683	11.1495	11.3315	11.6602	11.3076	11.6567	11.2621	11.6678	11.4049	11.3158	11.5668	11.1738	11.5797	11.4888	11.4882	11.4411	11.8347	11.5753	11.5062	11.6975	11.969
1110032F04Rik	3.586	3.86585	3.73574	3.46331	3.83051	3.54873	3.44455	3.53242	3.83882	3.80507	3.93933	3.94142	3.93178	3.6921	4.11872	3.83326	3.68754	3.82782	3.99616	4.36841	3.84678	3.58809	3.79144	3.50453
1110038F14Rik	5.54302	5.47068	5.32784	5.4674	5.54466	5.34312	5.69053	6.2027	5.10674	5.48727	5.38767	5.33694	5.11536	5.30929	5.25209	5.32618	5.35732	5.46766	5.59535	5.52001	5.10605	5.56535	5.50654	5.58362
1110059E24Rik	11.2718	10.8559	10.881	10.1948	10.0669	10.478	10.8696	10.2678	10.268	10.1046	9.96368	10.0046	9.73995	9.99969	10.1134	10.0191	10.0224	10.2753	9.32024	10.5155	10.353	10.4472	10.3583	10.2878
1110059G10Rik	9.28901	9.29846	9.21128	8.99179	9.22037	8.91266	9.32683	8.97087	9.06076	9.37936	9.30955	8.8051	9.25318	9.36346	9.06924	9.23745	9.02617	9.13646	8.65846	8.77338	9.25883	8.99295	9.1737	9.19684
1110065P20Rik	6.30337	6.19787	6.41798	6.04006	5.91847	5.85174	6.22003	6.21923	6.79073	6.12644	6.21338	6.46293	6.33171	6.2214	6.21682	6.47574	6.40376	6.81542	7.16607	6.59251	6.48674	6.28328	6.29119	6.16891
1190005I06Rik	5.67219	6.05709	5.60923	5.78805	5.55231	6.39802	6.09513	6.25291	6.34375	6.20478	6.01761	5.97049	5.93898	5.80279	6.61665	5.91289	6.05103	6.32925	6.76185	5.92115	6.16916	6.04622	6.06064	6.05801
1500004A13Rik	5.74131	6.5139	6.41791	6.69251	6.88971	6.74737	6.5513	6.89467	6.33047	6.45818	6.70747	6.30813	6.31673	6.46287	7.02495	6.03182	6.86478	6.33837	6.39715	6.46409	6.84283	6.23569	7.03893	6.50824
1500009L16Rik	7.58078	8.01341	7.43414	7.38305	8.01665	7.89067	8.3739	7.60309	8.02115	8.20818	8.52967	8.30669	7.26761	8.3017	8.04578	8.35021	7.76971	8.16355	7.97545	7.67339	7.41804	8.0519	7.65915	7.47687
1500011B03Rik	8.27752	7.96695	7.99289	8.14516	8.49988	8.23892	8.1915	8.47423	7.90299	8.43531	8.70105	8.30464	8.36214	8.45983	8.21153	7.9326	8.15697	8.01267	7.81308	7.46198	8.42797	8.46661	8.11516	8.16314
1600012H06Rik	10.4666	11.1179	11.22	11.0788	11.2395	11.417	11.3169	11.2382	10.6348	11.2216	11.397	11.0661	11.1202	11.0601	11.1416	11.1999	11.0795	11.0556	11.0888	11.3045	10.9286	11.3394	10.956	11.0606
1600014C10Rik	6.29186	7.55871	7.02219	7.70346	7.19276	7.51057	7.23732	8.13215	7.30603	6.79582	7.05276	6.92028	7.99592	7.15051	6.7494	6.87936	8.37116	7.1304	8.00886	8.02614	7.91834	7.48259	7.72219	7.70931
1600014C23Rik	5.09818	5.2014	5.11705	5.02982	5.14006	4.95	4.99089	5.44527	4.89482	5.2433	5.30811	5.0671	5.15023	4.9616	4.90236	5.42145	4.81631	4.76945	4.86608	4.9815	4.8323	4.92385	4.86263	5.07238
1700001F09Rik	4.14641	3.53444	3.63044	4.019	4.01545	4.27291	4.76585	3.95237	4.36071	4.05747	4.16594	4.18425	4.11398	4.27725	3.60618	3.95815	3.95182	3.97612	4.49034	3.74546	4.43637	3.37516	3.80916	3.89085
1700001G17Rik	4.10766	4.4452	4.26755	4.37217	4.03444	4.16914	3.88441	4.2214	4.07647	3.933	4.52051	4.45861	4.25448	3.92372	4.24581	4.31892	4.18066	4.24733	4.91425	4.29331	4.76712	4.41678	4.25954	4.40719
1700001J03Rik	5.87155	6.31559	6.03033	6.36196	6.30518	5.96546	6.48649	6.0985	6.67509	6.62497	6.18974	6.374	6.11081	6.35336	6.60711	6.15709	5.84509	6.28223	6.36521	6.08838	6.36367	6.20308	5.94996	6.02026
1700001J11Rik	4.39277	4.3239	4.94525	4.24011	4.36194	4.96172	4.57453	4.55195	5.07782	4.30687	4.66855	5.04448	5.00699	4.19226	4.57034	4.80546	4.56592	4.91792	5.02803	4.74093	4.53874	4.17068	4.26798	4.57367
1700001K19Rik	4.81433	4.78468	4.56243	4.56991	5.30793	4.30419	4.71046	4.33165	5.13773	4.56768	4.68135	4.64607	5.2277	5.18011	5.09255	4.49047	4.50994	4.5694	4.7317	4.36394	4.36235	4.66483	4.5215	4.39052
1700001O22Rik	7.07209	7.36955	6.93529	7.45253	7.60953	7.22398	7.40403	7.31028	7.06221	7.44483	7.04311	7.29223	7.28902	7.19573	7.29348	7.18895	7.24629	6.78414	6.25931	6.19758	7.53332	7.50993	6.86468	7.2648
1700003E16Rik	3.47004	3.96427	3.60493	4.10312	3.5141	3.45638	3.8637	3.63278	4.02032	3.67569	3.83261	3.68212	3.78954	3.63552	3.93036	3.69477	3.53101	3.62631	4.02414	3.48921	3.8994	3.67026	3.52894	3.93108
1700003E24Rik	6.23068	5.30381	5.20043	5.52617	5.50064	5.28102	5.27321	6.20046	5.24936	5.31021	5.20121	5.29599	5.34168	5.32413	5.30834	5.43448	5.24767	5.16012	5.37762	5.64123	5.20145	5.63814	5.17365	5.10154
1700003F12Rik	5.49917	5.61906	5.6198	5.40699	5.31964	5.25166	5.988	5.07317	5.60158	5.44542	5.60017	5.49878	5.48854	5.48169	5.74111	5.70969	5.59629	5.59234	5.70413	5.70287	5.98956	5.53614	5.50083	5.7751
1700006A11Rik	4.75091	4.43321	4.08897	4.03775	3.72324	4.18577	4.31557	4.67585	4.61013	4.30038	4.03562	4.8765	4.3129	4.27581	5.2376	3.75293	3.85996	4.27137	4.45966	4.18457	4.19412	3.61633	4.21261	3.91106
1700008J07Rik	7.14186	6.45419	6.43206	6.11157	6.1653	6.58444	6.45515	6.71801	5.81409	6.10466	6.21908	6.00392	6.1066	5.90405	6.15022	6.20062	6.18333	6.18692	5.27685	6.18689	6.22074	6.17255	6.28786	6.62308
1700008O03Rik	3.82477	3.42716	3.38632	3.44223	3.62037	3.15785	3.63091	3.54459	3.18621	3.68213	3.2807	3.3216	3.27135	3.2632	3.27284	3.47819	3.6187	3.58673	3.76094	3.6642	3.61293	3.46613	3.34661	3.16956
1700008P02Rik	3.99639	4.042	3.94872	3.76463	3.97052	4.91157	3.9366	4.58571	3.71895	4.2115	3.92988	3.59508	4.23911	4.00652	4.27955	4.76438	4.19981	4.0211	3.85802	4.002	3.47193	4.60059	3.89217	4.33608
1700009J07Rik	5.38694	5.37145	5.41066	5.17721	5.18837	4.80983	4.85345	5.05999	5.45848	4.97356	5.1598	5.40595	5.48347	5.15318	5.58414	5.4658	4.9735	5.44211	5.98102	5.43031	5.37492	5.23848	5.61398	5.33207
1700009N14Rik	2.93059	3.10338	2.94695	2.94369	3.12502	2.88526	3.15773	3.05648	2.94164	2.79638	2.98559	3.0227	2.88673	3.05074	2.87489	2.64739	3.04589	3.02487	2.92613	3.29762	2.88475	3.24042	3.01998	3.09273
1700010B08Rik	4.37654	3.77521	3.82967	4.05327	3.84861	4.3704	4.37626	4.1229	4.26431	4.18774	4.59503	4.46523	4.51984	4.42385	4.38986	4.24968	4.00714	4.12703	5.11982	4.47614	4.18592	3.88852	3.99628	4.38199
1700010D01Rik	3.80394	3.48586	3.23223	3.35798	3.4872	3.87381	3.04206	3.3441	3.74031	3.5439	3.77371	3.54858	4.2565	3.63036	3.35941	3.69125	3.53345	3.80397	4.00066	3.66795	3.31425	3.8105	3.60524	3.66851
1700010I14Rik	7.59925	7.02029	7.12102	6.60373	6.60523	6.56527	6.77155	6.94385	7.22645	7.02654	6.91196	7.13808	6.93917	7.05318	7.28796	7.45828	7.53574	7.37429	7.72276	7.52135	7.29865	7.05814	7.36069	7.15765
1700011L22Rik	4.33224	3.72039	3.68982	4.12161	3.78399	3.90739	4.03401	3.78096	3.67951	4.2147	4.10242	3.88856	3.64906	3.94249	3.90604	3.93995	3.64269	4.23678	3.57128	3.81334	3.48039	3.82167	3.33851	4.16631
1700012A03Rik	4.50525	3.89896	4.05509	4.20249	4.31065	3.80703	4.29207	4.33348	4.42215	4.47932	4.63696	4.59761	4.06098	4.70422	4.27089	4.07678	3.64754	4.11283	4.2176	3.89269	4.22186	4.08846	3.97338	3.73767
1700012B07Rik	5.07055	4.84275	4.46626	3.80689	4.44764	4.06797	4.55391	4.57913	4.86656	4.51893	3.81675	4.40167	5.01642	4.21992	5.449	4.74077	4.67885	4.56769	5.36375	4.4471	4.8971	4.39172	4.5591	4.21492
1700012B09Rik	7.60398	7.68421	7.07316	7.71853	7.98701	7.67222	7.35931	8.01451	7.65696	7.52152	7.88038	7.93186	7.88593	7.81944	7.93741	7.35716	7.43714	7.98038	8.26802	7.71995	8.1393	7.85316	7.62849	7.47071
1700013D24Rik	4.928	5.03227	4.57481	4.60876	4.52087	4.52229	4.47063	4.22574	4.98391	4.23648	5.19841	4.85531	4.73821	4.67585	4.85656	5.11245	5.42838	4.6461	5.5326	5.03475	5.1004	4.5802	5.15483	4.88074
1700013G24Rik	3.39225	3.22502	3.37613	3.95638	3.50914	3.52829	3.17193	3.24586	3.25985	3.43686	3.34091	3.22669	3.36871	3.16141	3.27745	3.10832	3.40604	3.33159	3.40277	2.84293	3.07676	3.52592	3.30119	3.04895
1700013H16Rik	4.95922	5.86896	5.31741	5.39423	5.21671	5.23596	5.26942	5.29721	5.57683	5.5766	5.67237	6.31103	5.00581	4.97527	5.30113	5.51994	5.57902	5.43233	5.51248	5.47375	5.56712	5.88417	6.11354	5.80375
1700016H13Rik	3.93459	3.41699	3.91689	3.48856	3.71678	3.47085	3.62851	3.6643	4.29842	3.74204	3.74988	4.00486	3.48456	3.93406	4.36871	4.21508	3.86987	4.01574	4.01006	3.91335	3.48476	3.96126	3.93166	3.61776
1700017B05Rik	10.1505	9.57734	9.46028	9.42802	9.90618	9.61241	9.42605	9.63106	9.3554	10.4457	10.6471	9.76958	9.14297	10.4475	9.72493	10.1356	11.0435	10.2062	9.98025	10.2717	9.45309	9.75912	9.41742	9.28952
1700017N19Rik	4.27269	4.03008	4.47717	4.77209	4.04255	4.77033	4.38327	4.03489	4.53209	4.63828	4.35511	4.40751	4.74884	4.15814	4.7304	4.16431	4.5791	4.39245	4.26525	4.11618	4.23081	4.74885	4.32409	4.09615
1700018B08Rik	4.76783	5.27473	5.47688	5.29065	5.42163	5.01405	5.40088	5.05321	5.37831	5.11106	5.28702	4.9211	5.29936	4.94902	5.56839	4.96352	4.86184	5.30068	5.74533	5.25107	5.08023	5.09968	5.29774	5.04214
1700018B24Rik	4.00589	4.30251	4.21789	3.55956	3.73638	4.04405	4.07142	3.91862	4.02161	3.73508	3.73042	4.5321	3.56926	4.04129	3.69725	3.88499	4.11797	3.73629	4.74556	3.64989	3.34418	3.91218	3.57164	3.48182
1700018F24Rik	7.10487	6.28693	6.13705	5.85076	6.52137	6.05417	6.30159	6.46475	6.43962	6.28479	6.01913	6.52683	6.11163	5.72365	6.30977	5.87347	6.87809	6.04082	6.0121	6.00282	6.5215	6.18813	6.34581	5.95587
1700018L02Rik	3.28881	2.99864	2.99571	3.70801	3.61542	3.20277	3.51279	3.37571	3.80194	3.56016	3.75492	3.18991	3.21093	3.68603	3.80505	3.59364	3.27027	3.41151	3.14394	3.50738	3.33358	3.75545	2.94893	3.44808
1700019A02Rik	7.23776	7.0546	6.90369	6.65925	7.64361	6.36327	6.51983	7.24593	7.13338	6.28375	6.16507	6.46351	7.31181	6.45148	6.57827	7.04266	6.72521	6.43052	7.09586	7.2688	6.86797	7.10368	7.19231	6.9286
1700019D03Rik	9.85594	9.99433	10.1578	9.64156	10.0308	10.1991	10.1579	9.51658	9.94847	9.24272	10.1809	9.48809	8.83574	9.11015	9.85423	9.80861	8.63202	9.28869	9.38813	9.36148	9.5388	8.95706	9.33875	9.28984
1700019M22Rik	5.55019	5.84348	5.46135	4.97463	4.96183	5.34532	5.67018	4.80444	5.59902	5.006	5.49634	5.12187	5.47243	5.24754	6.22881	5.76679	5.27693	5.64954	6.00544	5.2364	6.08262	5.91987	5.31095	4.9409
1700020A23Rik	5.12397	4.98134	5.06212	4.67542	5.05681	4.86354	5.01203	5.07796	4.97709	5.24995	4.97855	5.38117	5.33809	5.0099	5.30825	5.17203	5.04862	5.02216	5.36111	5.18222	5.1991	4.75362	5.08744	5.19947
1700020L24Rik	6.299	6.20794	6.17795	5.65466	6.11388	5.85382	5.98216	6.3205	6.5439	6.17178	5.99763	6.24533	5.93694	6.53313	6.9392	6.29353	6.45273	6.24549	6.57082	6.22052	6.15225	5.86893	6.17014	6.17511
1700020N01Rik	5.77934	5.34186	5.60535	5.56439	5.59997	5.19013	5.41393	5.32238	5.61544	5.39318	5.52021	5.45086	5.81052	5.67915	5.09774	5.57119	5.53998	5.46524	5.52289	5.68782	5.99721	5.48764	5.60811	5.39972
1700020N15Rik	7.5507	7.45708	6.95587	6.83085	7.25385	6.93965	7.00485	7.09283	7.82026	7.2377	6.75906	7.50822	7.4309	7.62769	7.6905	7.54125	7.33229	7.75009	7.38066	7.22929	7.58205	7.08767	7.21926	7.189
1700022A21Rik	4.45339	3.95412	4.1797	4.06093	4.44398	4.04496	3.78236	4.42361	4.20835	4.07273	3.9916	4.26038	4.03062	3.92019	4.2624	4.15475	4.41417	4.30265	4.57458	4.37806	4.20798	3.95917	4.10913	4.22273
1700024G13Rik	5.34951	4.84415	4.90937	4.44774	4.57122	4.63816	4.8841	4.46872	5.05816	5.32624	4.64184	5.21318	5.07358	4.81712	4.90817	4.95006	4.99365	5.13898	5.29875	5.36219	5.07182	4.57073	5.0221	4.53674
1700025B11Rik	4.56044	3.85822	4.56689	4.10965	4.1175	3.87936	4.27133	3.94204	4.35222	4.1892	4.1818	4.20136	4.0432	3.67014	3.68976	4.2155	4.28621	3.80954	4.51791	4.28191	4.32864	4.37772	4.28927	4.40097
1700025C18Rik	4.19397	4.08499	3.92509	3.82169	3.88239	3.43189	3.74924	3.33604	4.3533	4.01799	3.90929	4.21034	4.35025	4.06584	4.40295	4.20376	3.87846	3.97688	4.46694	4.31979	4.19487	4.05955	3.92231	3.79566
1700025G04Rik	14.1334	13.3173	13.6058	13.2663	13.2298	13.1897	13.616	13.2468	13.4203	12.8396	12.9497	13.0739	13.1436	13.2886	12.4682	12.9413	12.7517	13.0882	12.6975	13.1805	12.9245	13.254	13.0601	13.1099
1700028J19Rik	3.87055	3.51315	3.73481	3.28039	3.45873	3.72433	3.65726	3.60771	3.54641	3.82686	3.66239	3.65928	3.58979	3.58914	4.53542	3.74854	3.66592	3.69438	3.57842	3.68704	3.86115	3.45383	3.57995	3.54533
1700029F12Rik	4.70388	4.82081	4.68855	4.78139	4.89554	4.71361	4.70261	5.05309	4.79042	4.99628	4.7438	5.16971	5.08742	4.84563	5.06217	5.17064	4.74566	4.94844	5.59591	5.15773	4.88582	4.82191	4.85408	4.64699
1700029H14Rik	6.11738	6.73285	6.7273	6.57632	6.49761	6.06292	6.94755	6.76713	6.99221	7.25278	6.91771	7.39451	7.62603	6.91175	7.67166	7.01432	6.94117	7.06661	6.93061	6.75512	7.33243	6.61942	6.93274	6.61586
1700030C10Rik	4.10081	4.11168	4.16676	4.19084	3.81552	4.18494	4.16761	4.20597	4.49151	3.98513	4.17909	4.4556	4.28672	4.19827	4.27346	4.14711	3.93427	4.16418	4.73901	4.05899	4.48771	4.09462	4.33321	4.31503
1700030J22Rik	7.95975	7.45083	7.63984	7.342	7.74969	7.4068	7.51319	7.32615	7.59309	7.35125	7.56895	7.3543	7.46223	7.34431	7.42086	7.09534	7.35744	7.44911	7.29431	7.13832	7.34283	7.22312	7.38798	6.95133
1700030K09Rik	4.6675	5.66668	5.69555	5.60872	5.25173	5.4664	5.33709	5.70404	5.08073	5.12798	5.39069	5.54534	5.45029	5.39076	5.10992	4.98378	5.5907	5.9051	5.76122	5.82183	6.05494	5.94824	6.02866	5.60469
1700031F05Rik	4.27884	3.92837	3.70686	3.83796	3.71841	4.34246	4.18055	3.82301	4.39731	3.94623	3.91179	4.11954	3.83633	3.70691	4.04554	4.30839	3.95449	4.14342	3.80051	4.00492	3.82918	4.11336	3.70884	3.82134
1700031M16Rik	4.15204	3.88326	4.06983	3.83115	3.75969	4.02441	3.75096	3.69334	3.82486	3.69711	3.70759	3.98183	3.77332	3.61221	3.71509	3.76512	3.57843	3.86892	3.90984	3.76483	3.92086	4.01758	3.98826	3.75508
1700034E13Rik	5.62755	5.13083	5.20695	5.44326	5.4539	5.23665	5.57015	5.01186	5.72384	5.51124	5.28803	5.53847	5.58634	5.36874	5.92039	5.4152	5.6679	5.51632	6.11925	5.16804	5.50845	5.75491	5.57475	5.57322
1700034H15Rik	7.04601	6.43996	5.90474	5.74	5.91191	5.88342	5.79264	6.02134	6.3524	5.69655	6.01647	6.3679	5.70601	5.68223	6.40308	6.11607	5.99149	6.21819	6.08466	5.6996	6.13138	6.15673	5.58985	5.72025
1700034J05Rik	3.64806	3.54782	3.84246	3.43938	3.86829	3.97161	3.64948	3.53182	4.03558	3.76979	3.98484	4.28418	3.64946	3.49153	4.01035	4.51124	3.36048	3.94817	4.46362	4.25151	3.82583	4.05068	4.18477	3.89031
1700037C18Rik	4.06663	4.06379	4.11638	3.73809	4.65691	3.92748	3.95095	3.81807	3.99439	3.98565	3.97584	3.76772	4.27012	3.86347	4.36604	3.76797	4.21331	3.90797	4.34603	3.94603	3.83372	3.88733	4.02886	4.20021
1700048O20Rik	5.08091	5.22897	5.23444	5.29704	5.61208	5.09737	5.11336	5.58874	5.37643	4.72569	5.37475	5.02848	5.25688	4.88213	4.89062	5.1278	5.02372	5.46212	5.32925	5.62855	5.76763	5.48636	5.84241	5.58391
1700049E17Rik2	4.09392	4.03513	3.8011	3.37139	4.47669	3.68636	3.71967	4.1604	4.92567	4.14253	4.24924	4.49544	4.21418	4.10109	4.96331	4.10114	4.21491	4.48777	3.93502	4.08454	4.55908	3.52294	3.67596	4.26543
1700049L16Rik	8.17619	7.03625	6.82913	7.14245	7.18729	7.6413	7.1509	7.57254	6.97501	7.80644	7.73475	7.45499	7.33308	7.23203	7.26771	7.0341	6.90269	7.17452	7.32009	7.17684	7.19089	6.92213	7.17816	7.04613
1700052K11Rik	7.69589	7.5363	7.50734	7.20392	7.7535	7.21147	7.32303	7.40787	7.70256	6.42818	7.268	6.91805	7.08946	7.30857	6.66594	7.27094	7.46168	7.30897	7.46216	7.60298	7.79272	7.43487	7.7247	7.42886
1700056E22Rik	5.89837	5.50853	5.30794	5.20698	5.37329	5.29714	5.5243	5.05211	5.84662	5.65521	6.30794	5.66341	5.75273	5.59452	5.8098	5.86724	5.19498	5.72628	5.50972	5.58819	5.12349	5.49841	5.47131	5.7129
1700060C20Rik	5.02447	5.21597	4.83479	4.57056	4.95817	4.82756	4.94929	4.99248	5.10036	5.0911	5.46142	4.89105	5.12866	5.04077	5.31405	5.02341	4.85922	5.73618	5.5643	4.91765	5.07851	5.05724	4.8348	5.05414
1700061I17Rik	3.79511	3.47034	3.51841	3.41842	3.91451	3.01161	3.18708	3.6871	3.58594	3.39801	3.56689	3.68651	3.69594	3.43098	3.66551	3.49019	3.34907	3.30987	3.40784	4.10195	3.51768	3.54856	3.65894	3.03004
1700065D16Rik	3.31393	3.43233	3.40164	3.51265	3.36364	3.63898	3.34558	3.39717	3.39152	3.4213	3.47795	3.67586	3.35184	3.49196	3.52065	3.61583	3.56739	3.42458	3.82942	3.48044	3.31266	3.5599	3.37455	3.76547
1700066M21Rik	6.36634	5.92908	5.99582	6.1406	6.18722	5.82858	6.2342	6.21133	5.53891	5.97825	5.67723	5.66666	5.65447	5.84113	6.19854	5.63656	6.05969	5.45006	6.57306	6.1352	5.86097	6.31716	6.19221	6.16933
1700067K01Rik	4.197	3.73085	3.92657	3.79888	4.06778	3.82083	3.46437	3.72714	4.14761	3.70701	3.52091	3.85709	3.47701	3.78359	3.83894	3.32902	3.35778	3.9871	3.68778	3.57577	3.94192	3.4942	4.01809	3.91711
1700067P10Rik	5.52395	5.01951	4.95534	4.81297	5.05653	4.93741	4.75329	5.08062	5.36848	5.46763	5.40012	5.36591	5.42285	4.9727	5.8763	5.21206	5.21711	5.30281	5.94999	5.41379	5.82513	5.06816	5.11262	5.21424
1700069L16Rik	3.6421	3.63965	3.32194	3.97216	4.09035	3.7614	3.47292	3.75378	3.76372	3.96977	3.98968	3.78036	3.94053	3.98312	3.54074	3.63985	3.71246	3.54812	3.52136	3.76616	3.53478	3.69316	3.87276	3.52871
1700071K01Rik	8.10839	7.72414	8.01414	7.40331	7.88873	8.22451	8.19437	7.87239	8.211	8.24193	8.25584	7.94555	7.69405	7.85231	8.22101	8.18582	8.39698	7.95603	7.28024	8.0186	7.46094	8.26328	8.0729	7.69282
1700084J12Rik	6.57781	6.41876	6.57018	5.99008	6.94933	6.65743	6.52372	6.42257	6.61666	6.57879	6.5713	6.89771	6.51507	6.21248	7.03629	6.54238	6.60863	6.61941	6.76103	6.00988	6.74091	6.91008	6.6514	6.07876
1700084M14Rik	6.06226	5.58321	5.40281	5.22485	5.50056	5.21153	5.5405	5.96753	5.41087	5.59133	5.64687	5.44943	5.83184	5.44675	5.36768	5.12022	5.43708	5.69706	5.71083	5.46611	5.45057	5.52229	5.61599	5.55746
1700086L19Rik	6.27583	6.38044	6.20074	6.4062	6.69752	6.02829	6.24156	6.39618	6.23483	5.94477	6.78896	6.45587	6.08515	6.27975	5.83318	6.08071	6.33817	5.97776	6.00941	5.78852	6.1765	6.3263	6.12339	6.61759
1700088E04Rik	9.99997	9.30003	9.31963	9.4097	9.60066	9.22959	9.53283	9.14315	10.1364	9.5207	9.18276	9.66015	9.57385	9.19528	9.61328	9.74067	9.66707	9.32773	9.55279	9.0499	9.44814	9.12302	9.7702	9.49386
1700093K21Rik	6.88743	6.34786	5.79368	5.72198	5.73191	6.13651	5.75108	5.64871	6.42635	5.63823	5.84432	5.88831	5.87082	5.2002	5.91416	5.75189	5.473	5.80592	6.10773	5.86026	5.6366	6.00776	6.10855	6.36349
1700102P08Rik	6.13648	5.72175	5.22781	5.77176	5.66819	6.30557	5.54913	5.49428	5.4768	5.26706	5.24101	5.30284	5.29269	5.28439	5.73361	5.3878	5.40922	5.58318	5.38721	5.12588	5.44361	5.69766	5.76647	5.21643
1700109H08Rik	8.73655	8.60693	8.88071	8.64333	8.25286	8.36889	8.67947	8.84006	9.62131	9.98287	9.95421	9.71409	10.4975	9.79913	9.68727	9.7308	8.87651	9.58291	8.74876	9.27189	9.3697	9.22926	9.44484	9.47411
1700110I01Rik	6.60252	6.62424	6.72031	6.84473	6.64011	6.20602	6.33958	6.0792	6.42988	6.39966	6.34222	6.50634	6.33215	6.31236	6.81971	6.61943	6.22623	6.4158	6.33716	5.94622	6.6362	6.3487	6.13737	6.22554
1700113H08Rik	4.922	4.9344	5.29006	4.95796	5.63422	4.95016	4.90524	4.98999	5.09122	5.40131	5.02396	5.07515	5.16039	4.93218	5.07308	5.28683	5.03614	4.83757	5.22621	5.06087	5.15932	5.33947	5.26182	5.13509
1700120K04Rik	4.88246	4.73992	4.64203	4.8462	5.10068	5.10567	5.07926	5.26681	5.00284	4.90719	4.97627	5.54771	5.3941	5.12239	5.16524	4.8961	4.96223	4.86846	5.03053	5.06947	5.01318	5.31942	4.74399	4.69466
1700122O11Rik	3.43136	3.39153	3.58359	3.81995	3.77162	3.85482	4.01466	3.42217	3.83561	3.97836	4.1334	3.77635	3.74898	3.71446	3.75571	3.76005	4.19075	3.84811	4.01883	3.73727	3.73027	3.83409	3.83034	3.63862
1700123K08Rik	4.99464	5.39365	5.55936	4.83407	5.25821	5.7832	5.15801	5.21683	5.82887	5.74062	5.1812	5.35827	5.30763	5.3847	5.79745	5.15989	5.33466	5.42873	5.65787	5.15612	5.26955	5.37011	5.24693	4.87957
1700123O20Rik	10.1088	10.8429	10.7439	10.5214	10.5277	10.6452	10.8004	10.9799	10.0957	10.7589	10.6466	10.4569	10.3809	10.2198	10.411	10.2842	10.9502	10.8787	10.9117	10.7871	10.8292	10.4697	10.7831	10.7136
1700128F08Rik	3.27366	3.03188	2.78414	3.25775	2.90304	2.77431	2.95944	3.02976	3.05241	3.23333	2.95322	2.74826	3.0513	2.97953	2.60008	3.00374	2.86984	2.90845	2.59916	3.13587	2.75939	2.84318	2.76177	2.93404
1700129C05Rik	3.49106	3.76473	3.71134	3.54006	3.91035	3.63307	3.58813	3.79338	3.91283	3.84869	3.46641	4.23523	3.53369	3.68036	4.1143	3.98412	3.72495	3.80321	4.1321	3.66345	3.88587	3.99719	3.55556	3.72034
1810009J06Rik	4.16236	3.86864	4.05007	3.53591	3.74257	3.78766	3.53104	3.49577	3.67053	4.18717	4.09728	3.6762	3.88035	4.04943	4.25011	3.91	4.23427	3.94143	4.57895	3.90862	4.21493	3.75414	3.45011	3.63891
1810009N02Rik	2.88424	2.96861	2.95763	2.83363	2.75713	3.10615	2.7717	2.86405	3.19325	3.10994	3.06554	2.88324	2.8714	2.96614	3.20652	2.84717	3.10963	3.36288	3.08087	3.04584	2.86592	2.72395	2.86748	3.08086
1810010H24Rik	10.0335	9.3661	8.88233	9.65722	9.82039	9.7789	9.411	9.41801	9.38419	8.7512	8.70346	9.1316	9.34746	8.68926	8.88199	9.24263	9.02983	8.36999	7.78494	8.64489	9.04056	9.05891	8.80938	8.8831
1810024B03Rik	7.5013	6.18352	6.04607	6.01638	6.42673	6.1143	5.91261	6.47766	6.00591	6.56889	6.09899	6.20214	5.93819	6.12466	6.30267	6.2137	6.59942	6.22193	6.45383	6.35405	6.04805	6.07587	6.20316	5.95807
1810030O07Rik	10.9089	11.3399	11.1716	11.1299	11.1532	11.4035	11.3006	11.2159	11.0499	10.8088	11.0205	10.7953	10.997	10.9564	10.8093	10.902	11.2228	11.3034	11.1441	11.3694	11.2783	11.2226	11.4056	11.1381
1810037I17Rik	10.8508	10.9857	10.9105	10.881	11.2363	10.9021	11.0168	10.6878	10.8778	10.8905	11.0766	10.5733	10.6715	11.0521	10.7738	10.6181	10.4437	10.8422	10.4032	10.4762	10.0577	10.5608	10.6928	10.8757
1810055G02Rik	9.81249	8.41518	9.66646	9.53249	9.17994	9.38587	8.52564	8.69522	9.83687	10.9806	10.3716	10.399	12.1548	10.0776	9.21965	10.3359	9.65092	9.26854	9.55951	10.3015	8.88606	9.7047	9.21257	8.93633
1810062G17Rik	4.13337	3.79298	3.91731	3.76754	4.62176	3.79341	4.25445	4.00676	3.75925	4.03619	4.22514	4.07269	3.82964	3.6509	3.95959	4.43188	3.82948	3.60851	3.95095	3.91223	4.02734	3.99163	4.19714	4.2558
1810064F22Rik	3.89942	4.57285	3.69986	3.91324	4.44548	3.97794	5.12048	4.14431	4.76703	4.26104	4.15346	3.41709	4.52313	4.59073	4.19126	4.44539	4.57013	4.53352	4.03273	4.11009	4.72116	3.84594	4.31374	4.06056
1810065E05Rik	12.1638	13.1605	11.9977	11.8146	13.2908	12.7009	13.2121	12.1183	10.0911	11.1707	12.4082	11.613	8.60696	9.10036	12.1855	11.3422	10.1109	11.8546	11.4241	10.5449	11.8277	10.309	11.2936	11.7585
2010003K11Rik	9.09932	10.2476	10.955	10.6708	10.7111	10.7242	10.4213	10.337	10.1778	11.1678	10.791	10.5943	11.7955	11.2523	10.8133	11.414	10.6322	10.335	10.4227	10.5762	9.14526	11.043	10.3256	10.2279
2010016I18Rik	9.8689	9.04205	8.92447	8.55855	8.65996	8.82126	8.89213	9.11391	8.29838	8.54246	8.60038	8.79842	7.96179	8.18809	8.7338	8.49388	8.60251	8.27341	8.03575	8.12008	8.82807	8.16924	8.37433	8.31542
2010106E10Rik	15.9823	15.6521	15.7491	15.9355	15.4395	15.8141	15.7767	15.747	14.8427	15.3846	15.0449	15.2402	16.2829	15.2234	15.0714	15.2156	14.7045	13.8654	14.4501	14.7031	15.1114	14.8821	15.0185	15.0201
2010109A12Rik	4.38151	4.71756	4.38256	4.90423	4.86561	4.47662	4.69326	5.18764	4.83793	4.54058	5.19305	4.93327	4.28958	4.12267	4.07001	4.4532	4.7478	4.49169	3.93721	4.50656	4.91824	4.71111	4.5366	4.64055
2010315B03Rik	12.4854	12.2742	12.3775	12.3737	11.8917	12.1002	12.2141	12.1065	11.766	11.3076	11.4112	11.516	12.2023	11.5105	11.3702	11.6937	11.7426	11.1285	11.2243	11.7868	12.2524	11.5567	12.2449	12.3102
2200002D01Rik	15.8766	15.59	15.407	15.8287	15.885	15.9799	15.5365	15.7711	15.2745	15.8537	15.8459	15.546	15.5222	15.7314	15.7658	15.7082	15.6541	15.5719	15.4098	15.4302	15.6216	15.901	15.7871	15.6752
2200002J24Rik	3.93812	3.67294	3.55965	3.91055	4.04247	3.7001	3.54278	3.78687	3.81486	3.5052	3.56782	3.8306	3.90285	3.78151	3.99619	3.52439	3.75544	3.55659	3.65495	3.49606	3.45111	3.97724	3.40619	3.4574
2210016L21Rik	10.8503	10.1474	10.0203	10.3653	10.1818	10.1764	10.2985	10.2705	10.276	10.0643	10.3833	9.84939	9.73493	10.0635	9.80408	9.81509	9.78843	10.0658	9.68161	10.0061	10.3439	10.1382	9.96631	10.0482
2210408I21Rik	7.33813	7.80624	7.99025	7.61301	7.86959	8.3358	7.98321	7.96385	7.17291	6.95886	7.36131	7.20282	6.98732	7.26105	7.3661	7.74649	7.57723	7.19072	7.11051	8.05216	8.1666	7.56067	7.76357	7.8052
2300002M23Rik	4.73884	4.61923	4.70838	4.51831	4.46167	4.01431	4.47223	4.21422	4.66542	4.48219	4.45395	4.68555	4.70045	4.60801	4.8491	4.56118	4.57285	4.81182	4.99028	4.78519	4.87549	4.43752	4.6744	4.30039
2300009A05Rik	8.78105	8.69577	8.99723	9.22086	9.28299	9.1907	8.88746	9.01014	9.3459	9.53699	9.62787	9.49875	8.89919	9.28906	8.92334	9.12087	9.56352	9.58334	9.45815	9.5732	9.01782	9.6676	9.37477	9.4132
2310001K24Rik	4.09132	4.4262	4.41847	4.23418	3.94536	3.96267	4.15398	4.24487	4.85238	4.31081	4.59488	4.08826	4.66632	4.3165	4.70428	4.30403	4.28399	4.12815	5.71177	4.61809	4.16293	4.04428	4.30147	4.00659
2310002L09Rik	5.16213	4.56169	4.78199	5.03998	5.45862	4.82463	4.66454	4.47794	4.50148	4.89198	4.55166	5.09976	5.09302	5.33807	4.96138	4.87958	4.67309	4.80807	4.7542	4.82123	4.38807	4.84601	4.33286	4.47423
2310009B15Rik	4.35959	4.13915	4.18175	4.5294	3.94627	3.83709	4.23922	4.41599	4.8217	4.45553	4.6455	4.59602	3.81637	4.2651	4.03923	4.32551	4.23242	4.45308	4.04688	4.28855	4.2762	4.92611	4.42609	4.50441
2310011J03Rik	6.10991	6.45693	6.90334	7.02608	6.90872	6.83456	6.80217	6.85284	6.56142	7.06592	7.10452	7.17138	6.7359	6.79548	6.87405	6.98672	7.30922	7.10344	6.81638	7.70106	6.59286	7.12354	6.80326	6.92718
2310022A10Rik	8.76943	9.33458	9.27712	9.06927	8.87763	8.9367	8.89139	9.15335	8.91668	9.00124	8.83775	8.99301	9.04127	8.8674	9.02051	8.74358	9.56684	9.53169	9.68257	9.26498	9.52847	9.25927	9.20278	9.14173
2310022B05Rik	6.80067	6.6851	6.40406	6.35321	6.21602	6.80386	6.77237	6.343	6.26668	6.85498	6.72168	6.23589	6.32102	6.83643	6.27253	6.52069	6.33224	6.26285	6.22054	6.58204	5.83031	6.15827	5.97566	5.57888
2310030G06Rik	10.0904	9.29152	9.08175	9.20731	9.12581	9.0402	9.25819	9.6479	9.10628	9.10414	8.95336	8.52533	9.03753	8.29575	8.36413	8.16128	8.26788	8.40267	8.57595	8.6321	8.70642	8.89414	8.65321	8.38458
2310033P09Rik	11.6734	11.3252	11.5736	11.3528	11.3569	11.1054	11.577	11.0853	11.0285	10.8933	10.906	10.7984	11.2663	11.3126	10.7495	11.248	11.0012	11.1106	10.6494	11.65	11.2254	11.2589	11.4838	11.1872
2310039H08Rik	7.41671	7.19023	7.13119	7.31958	7.46194	7.19629	7.38103	7.23063	6.90319	7.54841	7.56689	7.22599	7.29828	7.15799	7.22995	7.66743	7.33977	7.72665	7.21787	7.2255	7.20954	7.51689	7.56161	7.27857
2310057J18Rik	5.07582	5.56994	4.76363	4.90114	5.63537	4.709	5.41723	5.09284	4.94458	5.47524	5.05207	5.40588	5.60687	5.4743	4.76232	5.31542	4.98249	5.2636	5.26321	4.97662	5.11809	5.28278	5.02964	4.88101
2310057M21Rik	8.45164	8.32959	8.71749	8.45458	8.2549	8.31397	8.19332	7.70664	8.60338	8.31382	8.22869	8.53877	8.51241	8.77597	8.59571	8.68307	9.06469	9.30646	8.94848	9.06403	8.42403	9.17107	8.76678	8.53651
2310061I04Rik	11.8826	11.5417	11.5799	11.6336	11.8952	11.761	11.6766	11.6973	10.9809	11.439	11.4662	11.1374	11.8222	11.5272	11.9075	11.6929	11.6263	11.5556	11.5757	11.6196	10.8156	11.5019	11.6364	11.3589
2310068J16Rik	4.54288	5.01084	5.03827	5.00987	5.23753	4.70645	4.86349	4.96738	4.99096	4.92748	5.35131	5.02822	4.54117	4.93627	4.62419	5.04308	4.77223	4.88479	4.76907	4.76391	4.86433	4.82678	5.02452	4.91909
2310079G19Rik	3.19406	3.39114	3.30637	3.27357	3.17239	3.30345	3.06788	2.88187	3.48538	3.20624	3.38309	3.46883	3.6292	2.96583	4.03684	3.18408	3.83583	3.37552	4.24456	3.33222	3.38838	2.93856	3.33288	2.87063
2410002F23Rik	10.9746	11.2975	11.3247	11.599	11.4883	11.5092	11.1383	11.4319	11.5679	12.6387	12.1852	12.3059	12.281	12.9804	12.0514	12.8672	12.4963	12.6103	12.3346	12.6489	12.4285	12.3841	12.3526	12.1524
2410004B18Rik	8.49558	8.05363	8.11071	8.2102	8.51414	8.28165	8.2633	8.52962	7.69657	8.66269	8.27074	8.49128	8.05281	8.06183	8.40658	8.18348	8.20111	7.97426	7.58441	8.37381	7.91925	8.36955	7.96244	7.94061
2410004P03Rik	5.40451	4.74418	4.73747	4.52658	4.78962	5.06381	4.9062	4.49008	4.85007	4.71907	4.83375	4.62532	5.11962	4.46549	4.7612	4.84623	4.80879	5.1465	4.64736	4.93254	5.1412	4.89657	4.71621	4.93076
2410017I17Rik	4.87989	5.46761	5.26883	5.22621	5.03708	5.09966	5.00204	5.28347	5.08022	4.90745	5.14376	5.00957	5.20553	5.40592	4.94912	4.88018	4.9501	5.0031	5.312	4.99975	5.10491	4.80029	4.8054	5.22846
2410124H12Rik	3.04852	2.72963	2.64489	2.69779	2.71241	2.62826	2.71702	2.86177	2.76543	2.77348	2.57673	2.84638	2.83809	2.72226	2.8602	2.7264	2.75951	2.83328	2.70913	2.78998	2.80641	2.77244	2.54765	2.60307
2410137M14Rik	3.12176	3.81811	3.82626	3.41331	3.26582	3.33524	3.00795	3.37321	3.20915	3.18481	3.1987	3.18906	3.58602	3.13405	3.28212	3.23897	3.31831	3.36321	3.39953	3.3449	3.5049	3.53586	3.11963	3.16693
2510002D24Rik	6.78569	6.36506	6.15591	6.12637	6.27873	6.38359	6.92963	6.66263	6.73567	6.42426	6.49028	6.10316	5.94249	6.46212	6.02745	6.12478	5.78688	6.40146	5.93509	6.25051	6.42737	6.70383	6.46486	6.30679
2510009E07Rik	7.96406	7.87161	7.67565	8.14182	7.92854	7.67511	8.1832	7.77537	7.23238	7.86345	7.26728	7.3179	7.03819	7.28782	6.86904	7.25115	7.20571	7.07234	6.86089	7.35195	7.71421	7.35072	7.40457	7.86296
2510039O18Rik	8.89059	8.99168	8.87664	8.94567	9.05377	9.09314	9.0873	8.75396	8.81481	9.21122	9.15322	8.94513	8.75634	9.2404	9.12594	8.9629	8.77127	8.99883	8.13178	9.03214	8.80753	9.14034	9.16763	8.88097
2610005L07Rik	16.9166	16.9416	17.0101	17.0984	16.714	16.9051	16.6787	16.8073	16.5265	16.4846	16.5314	16.6317	16.7096	16.592	16.5986	16.6249	16.7289	16.6182	16.6024	16.7722	17.0198	17.0784	17.059	17.0439
2610008E11Rik	9.20933	9.5959	9.49159	9.42429	8.98572	9.30154	9.51241	9.63904	8.69203	8.86964	9.02824	9.15907	9.39882	8.4306	9.01139	8.50734	9.0955	8.83685	8.73834	9.25963	9.65424	9.17227	9.43784	9.5176
2610028H24Rik	7.06379	6.50756	6.41746	6.43042	6.57273	6.27768	6.2397	6.39349	6.71286	6.4051	6.31324	6.44411	6.83777	6.19176	6.92332	6.36141	6.57128	6.66321	7.67334	6.66699	6.67171	6.4595	6.55823	6.54404
2610203C22Rik	5.7039	6.01471	5.62381	5.46319	6.13243	5.40238	5.73657	5.78994	6.07952	5.70413	5.51255	5.73834	5.98896	5.52978	5.99146	5.25237	5.52735	5.49596	6.02197	5.60244	5.71371	5.70585	5.63946	5.86118
2610306M01Rik	4.81248	4.3723	4.60595	4.48202	4.33623	4.7276	4.39689	4.30734	4.73963	4.08451	4.39794	4.06729	4.42167	3.98863	4.16422	3.8891	4.52354	4.2008	4.6086	4.5511	4.68852	4.49804	4.22051	4.4736
2610318N02Rik	4.9599	4.6995	4.92738	4.97518	5.09974	5.15778	5.04381	5.07174	5.13641	5.79213	5.25295	5.06731	5.03481	5.07943	5.18316	5.62841	5.64804	5.08505	4.3806	5.18317	4.89259	4.63505	5.24617	5.20544
2610524H06Rik	6.093	6.42587	5.91865	6.50691	6.72391	6.49087	6.1781	6.55771	6.23949	6.22957	6.5251	6.48278	6.26642	5.82708	6.46058	5.82436	6.87824	6.64069	6.48804	6.55343	6.60825	5.72092	6.83682	7.18759
2610528J11Rik	11.7784	11.2545	11.0349	10.9306	11.6499	11.3	10.604	11.0312	11.1465	11.6134	11.4613	11.1843	10.7353	11.7653	11.411	11.4175	10.8993	11.2399	10.8317	10.6371	9.99686	11.5819	11.265	10.7527
2700046A07Rik	7.09898	7.44771	7.05283	6.63955	7.06319	6.54036	6.80524	7.13519	7.32685	7.56522	7.09326	6.95922	6.91417	7.10991	7.50809	6.89644	7.01604	7.31866	7.41083	6.61796	7.21587	6.98174	6.73267	7.16535
2700049A03Rik	6.77971	7.31171	7.45731	7.36183	7.34303	7.44091	7.41769	7.36294	6.70979	6.7469	6.91875	7.0758	6.8054	6.61109	7.20335	6.95772	7.11307	6.6307	7.24913	7.46458	7.61204	6.94017	7.44657	7.5627
2700062C07Rik	8.2987	7.71975	7.51474	7.37167	7.85561	7.93575	7.88628	8.14913	8.01835	8.06199	8.27195	8.01906	7.88948	8.43913	7.7603	8.11231	8.11375	7.61025	8.09897	8.10892	8.01895	8.18195	8.0867	8.13965
2700097O09Rik	9.63371	9.40354	9.2876	9.22316	9.57158	9.39483	9.39128	9.66946	8.93164	8.55664	8.92827	8.6705	8.10832	8.81226	8.81291	8.69383	8.49301	8.36856	7.86279	8.44659	8.54245	9.11103	8.61942	8.36457
2810004N23Rik	9.62017	9.11925	9.0811	8.71528	8.69401	8.83846	9.23815	9.25775	8.568	8.92753	9.00752	8.31366	8.96571	8.99126	8.72061	8.93146	9.21544	9.62689	8.92208	9.79622	9.09982	9.09003	9.00851	9.07936
2810021J22Rik	9.92377	9.68246	9.89652	9.46279	9.31736	9.60695	9.64123	9.93663	9.43034	9.06514	9.49821	9.61474	9.61775	9.21133	9.29754	9.538	9.82724	9.89226	10.2136	9.98138	10.2322	9.51542	9.79876	10.0802
2810025M15Rik	8.872	7.93734	8.07185	8.11351	7.62354	7.9232	8.12993	7.97428	8.31761	7.58456	8.06217	8.25932	8.00414	7.95294	8.53338	7.98849	7.57842	7.83901	7.53431	7.5444	7.71185	7.93988	7.84606	7.79458
2810032G03Rik	5.18983	5.56603	5.25012	5.41984	5.04857	5.60998	5.38098	5.53212	5.04349	5.14126	5.52663	5.69097	5.5313	5.56639	5.4854	5.43989	5.73596	5.61388	5.86406	5.40285	5.18337	5.1085	5.30992	5.23474
2810408A11Rik	7.06276	7.57329	7.74782	7.54629	7.52932	7.48829	7.30788	7.3314	8.56784	7.42011	7.19504	7.96063	8.06473	7.75581	7.41116	7.66786	7.39663	6.94124	7.22479	7.64754	7.75799	7.68129	7.74969	7.49965
2810459M11Rik	6.52698	6.20705	6.38974	5.81682	6.01608	5.90139	6.13659	6.27355	6.0995	5.99177	6.40564	6.10505	6.34731	6.08669	6.45888	6.21497	6.15824	6.19294	6.24214	6.402	5.94257	6.12172	6.34995	6.12157
2900026A02Rik	11.3849	10.9024	10.7724	11.2219	11.0776	11.1013	10.725	10.5719	9.19578	10.8453	10.738	10.2044	10.424	10.6632	10.7474	10.3781	10.2473	10.0935	9.57823	10.1719	10.2749	10.2739	10.2792	10.0484
2900060B14Rik	14.2412	13.6544	13.7735	13.7554	13.5349	13.9219	14.0607	14.2915	12.8676	14.056	14.2863	13.9849	13.8861	13.8816	14.0434	13.9656	14.193	13.8349	14.1001	14.0043	14.1012	13.9636	14.0134	14.3716
2900092C05Rik	4.50047	4.22037	4.19363	3.82244	3.99383	4.94541	3.9739	3.95838	4.59934	4.45622	4.24317	4.67442	5.44614	4.86902	4.13826	3.81537	4.12262	4.45347	4.72403	4.40235	3.76562	4.36273	4.7669	4.41854
3110009E18Rik	7.80086	7.42845	7.72156	7.48317	6.91605	6.50677	7.40432	7.18813	8.17117	6.97747	7.17287	6.22656	7.88204	7.28273	8.37768	8.03976	7.79226	7.80855	8.25937	8.25376	7.68766	7.42736	8.02093	7.74148
3110021A11Rik	4.69661	4.4968	4.43113	4.38268	4.79208	3.90636	4.39919	4.2576	4.48666	4.14133	4.46701	4.54831	4.34989	3.87071	4.29108	4.30068	4.28911	4.18565	4.21824	4.4001	4.38935	3.70112	3.96501	3.9321
3110039M20Rik	5.14603	5.00313	4.54313	5.08371	5.13815	5.0486	4.81072	5.10376	5.02949	5.05346	5.05915	5.13807	4.99143	4.88499	5.39307	5.22101	5.17715	4.96902	4.57352	5.0369	4.89426	4.97977	5.09761	4.77074
3110040N11Rik	9.54454	8.767	9.03605	8.73331	8.49761	8.49511	8.90613	8.69896	8.94074	8.01835	8.39707	8.43907	8.27652	8.29051	8.48503	8.49017	8.39963	8.31195	8.46608	7.97229	8.73062	8.32108	8.6553	8.25975
3110070M22Rik	6.64266	6.80368	6.73084	6.62482	6.25785	6.58099	6.57537	6.48343	6.55317	6.54359	6.83032	6.11898	6.86624	6.59982	6.74752	6.78837	7.1777	6.76802	7.72834	7.03338	6.53152	6.45021	6.97624	6.67133
3110082I17Rik	10.9824	11.3427	10.9679	10.7059	11.0741	10.6191	11.0486	10.8488	11.4863	11.3058	10.9263	11.2609	11.2845	11.189	11.4122	11.576	10.9698	11.5156	11.3313	11.0882	11.3706	11.1822	11.3234	11.1793
3110082J24Rik	6.80709	6.38126	6.40672	6.42591	6.61168	6.77569	6.34695	6.33087	6.39952	6.64807	6.20298	6.64523	6.45199	6.32737	6.79321	6.23761	6.18103	6.23851	6.38528	6.24167	6.46682	6.43271	6.3851	6.54932
3300002I08Rik	9.2919	9.93595	10.061	10.0789	9.77393	9.76652	9.70428	10.1573	9.36859	9.30847	9.14744	9.68386	10.7909	9.88018	8.8976	9.71804	9.99717	9.62082	9.62186	10.1715	10.5635	9.77956	10.3762	10.3986
3425401B19Rik	5.65066	5.62858	5.28624	5.60703	5.41766	5.34118	5.04057	5.82919	5.78438	4.95852	4.88124	5.43573	5.47256	5.12998	5.88898	5.35246	5.43353	5.06024	5.89185	5.09819	5.53602	5.10629	5.44238	6.19953
3830403N18Rik	6.13095	5.1683	6.10813	5.9981	5.57514	6.48031	6.32318	6.56058	7.55706	5.35661	6.04588	5.13384	5.82385	6.15491	5.87276	5.15623	5.97429	5.63304	5.96527	6.016	5.71332	5.742	5.50129	6.20893
3830408C21Rik	6.92409	6.25742	6.35081	6.39469	6.97941	6.37617	6.48221	6.72298	6.52043	6.56884	6.59909	6.8601	6.48101	6.19757	6.29322	6.48104	6.10674	6.40576	5.96323	6.3198	6.47761	7.09304	6.03148	6.48312
3930402G23Rik	6.0825	5.7631	5.6832	5.71131	5.75408	5.61621	5.79153	5.68767	6.08435	5.99103	6.19647	5.61431	6.23593	6.35473	6.21581	6.52319	5.78128	6.35074	6.08546	6.3328	5.89845	6.51927	5.87224	5.97575
4632415L05Rik	7.59405	7.77579	7.82645	7.75955	7.63157	7.94105	8.00728	7.66883	7.21	7.52344	7.55966	7.89723	7.73099	7.50507	7.37072	7.38847	7.88704	7.30124	7.38289	8.0591	7.82682	7.37027	7.69314	7.85729
4732471J01Rik	7.74642	7.44667	7.46595	7.75856	7.56502	7.5621	7.16999	7.75372	7.61586	7.56549	7.32084	7.44968	7.31799	7.00276	7.38559	7.62234	7.65827	7.48651	7.42952	6.74836	7.57109	7.35355	7.63853	7.44696
4833420G17Rik	11.4026	11.3056	11.4493	11.6102	11.1766	11.3421	11.3095	11.5638	10.6562	10.8932	11.0186	11.1155	11.3374	10.3252	11.1998	10.8812	11.4595	10.5822	10.681	11.4472	12.2167	11.2468	11.9475	12.2579
4833439L19Rik	16.1196	14.8819	14.8313	14.7392	14.7178	14.8959	14.6526	14.6702	14.1949	14.8039	14.8233	14.6224	14.7456	14.714	14.6401	14.7787	14.5209	14.5974	14.6715	15.0413	14.6372	14.7777	14.541	14.2899
4921504E06Rik	3.87518	4.09986	3.99989	3.50225	4.29877	4.3896	4.33291	4.57345	3.91633	3.9519	4.5102	4.2346	4.22305	4.86542	4.12185	4.28111	4.42362	4.06211	4.58497	4.03033	4.29375	4.12919	4.41195	4.26805
4921509C19Rik	6.38727	6.20267	6.13984	6.11928	6.31938	5.95167	6.41593	6.24497	6.7423	6.24848	6.40412	6.47884	6.37496	6.15904	6.0184	6.37986	6.15694	6.10107	6.44781	6.16788	6.437	6.32703	6.11174	6.28526
4921511C20Rik	4.68572	5.01158	4.76346	4.79584	4.86444	4.48236	4.52764	4.5824	4.65046	4.41392	4.43825	4.55626	4.80154	4.73089	5.26548	4.55096	4.57158	4.74904	4.53159	4.55431	4.59765	4.63764	4.46042	4.13126
4921513I03Rik	3.63641	3.84414	3.94879	3.62747	4.10966	4.23393	3.71854	4.01899	4.45967	4.47093	3.94067	4.17351	3.98503	4.44034	3.95725	4.2128	4.18023	3.80791	4.51065	3.91907	3.91885	3.83028	3.98801	4.06291
4921517D22Rik	5.11324	4.90649	4.71884	5.22575	4.66657	4.68084	4.9414	4.6575	5.02786	5.07864	4.87235	5.22964	4.86004	4.97785	5.15661	4.8193	4.85733	4.93214	5.18556	4.56538	4.94348	4.76922	4.97106	4.88398
4921524J17Rik	7.55147	7.02718	7.25418	6.78562	6.87019	6.52981	7.16536	7.16053	6.92344	6.70707	6.55271	6.97063	6.86726	6.74661	6.98205	7.13832	6.85548	7.30666	6.96179	7.42974	6.96295	6.8448	6.82721	7.02673
4921524L21Rik	4.30779	4.23265	4.39571	4.13618	4.16683	3.8416	4.27467	4.00885	4.47888	4.29361	4.13054	4.38931	4.40726	3.97833	4.52172	4.3636	4.43234	4.32424	5.65618	4.49737	4.66129	3.78815	4.37323	4.16116
4921536K21Rik	5.89296	5.29095	5.25661	5.24555	5.43102	5.16868	5.20596	5.58803	5.28574	5.06688	5.15464	5.24897	5.46913	5.59195	5.85617	5.3283	4.96818	5.117	4.97471	5.13572	5.25087	5.46953	5.00663	4.78387
4921539E11Rik	4.52561	4.74894	4.72748	4.87869	4.82493	4.20432	4.40941	4.72816	4.7981	4.25959	4.32885	4.62427	4.65625	4.33884	4.59028	4.39825	3.94786	4.82203	4.79101	4.45472	4.72235	4.39021	4.14483	3.92387
4930402F06Rik	3.68966	3.40549	3.82058	3.47102	3.46737	3.25057	3.52054	3.69834	3.54131	3.4072	3.18052	3.60995	3.71766	3.54486	3.45106	3.52786	3.50626	3.48076	3.52966	3.52005	3.43532	3.55401	3.29441	3.36222
4930402K13Rik	4.8147	4.48043	4.70073	4.94123	4.67495	4.39309	5.03303	4.96723	4.79158	4.87289	4.98507	4.74549	4.59833	4.18457	4.76481	4.94306	4.66478	4.60596	4.86161	4.69082	4.94261	4.6156	5.38364	4.52865
4930407I10Rik	3.62274	3.65546	3.55648	3.63	3.92514	3.45246	3.86368	3.68414	3.5718	3.98159	3.25656	3.68116	3.69777	3.9008	3.96597	3.85442	3.39277	3.80583	4.00323	3.56555	4.23225	3.60136	3.74419	3.77363
4930426D05Rik	4.40157	5.31454	5.02638	5.20487	5.0584	5.22601	4.62495	6.89292	5.10292	4.98558	4.9337	5.2593	5.06283	5.04738	4.91136	4.77322	5.92213	5.0309	5.22734	5.28994	6.20367	4.94249	6.00136	5.7388
4930426L09Rik	5.02912	4.72526	4.69091	4.83248	4.59277	4.85668	4.71476	5.25615	4.65407	4.94416	4.59898	4.74402	4.68983	4.8896	4.56158	4.72227	4.62888	4.66676	5.19136	4.65943	4.76917	4.77135	4.63612	4.84568
4930429B21Rik	4.88777	5.21495	4.60986	4.54201	4.46452	4.8863	5.02351	4.45969	4.40433	4.43698	4.68835	4.09344	4.11934	4.21447	4.09216	3.80474	3.71807	4.55153	3.80889	3.74026	4.34809	4.58282	4.50351	4.51465
4930431F12Rik	8.16507	8.00733	7.81917	7.61846	7.54425	7.53409	7.73354	7.84365	8.02218	8.12678	7.88038	8.2917	8.30719	7.70045	8.364	7.77941	7.90079	8.22785	7.93188	7.70442	8.1677	7.84669	7.98864	7.88129
4930432M17Rik	4.88251	4.35189	4.34394	4.40386	4.55737	4.16759	4.38002	4.84063	4.3009	4.28402	4.29496	4.30458	4.62457	4.34753	4.24937	4.11127	4.34604	4.35227	4.22954	4.47832	4.15844	4.50242	4.29854	4.04971
4930433I11Rik	3.17248	3.39976	3.58197	3.2571	3.33229	3.5073	3.6302	3.2919	3.54212	3.08934	3.69299	3.52485	3.27001	3.71806	3.59988	3.3337	3.14005	3.45505	4.02984	3.89616	4.11266	3.85321	3.36697	3.38799
4930433N12Rik	4.56188	4.50206	4.67126	4.55099	4.27101	4.49768	4.29449	4.42288	4.21125	4.8744	4.15525	4.5926	4.38875	4.35784	4.94117	4.65381	4.26458	4.13031	4.45758	4.4491	4.3025	4.28377	4.2259	4.83981
4930438A08Rik	4.82776	4.56541	4.09669	4.32709	4.15254	4.1107	4.40294	4.42709	4.35054	4.7155	4.12345	4.16569	4.38853	4.41806	4.16697	4.19081	4.43159	4.61413	4.22265	4.03051	4.39937	4.27531	4.53362	4.64001
4930444P10Rik	4.45905	4.22462	4.4285	4.02437	3.74689	3.83187	4.47585	4.32789	4.6108	4.1603	3.93248	4.15408	4.25677	4.45527	4.64835	4.13884	4.26419	4.43529	3.83268	4.44406	4.08194	3.95788	4.28946	4.8771
4930447A16Rik	4.41883	3.52128	3.97586	4.05578	3.97828	3.54958	3.44038	4.15382	4.07533	4.44924	4.37062	4.45854	4.27739	3.69023	3.77615	4.0289	3.46226	3.60638	4.1193	3.6621	3.85075	3.75584	3.73042	3.62912
4930447C04Rik	5.54915	5.3237	4.54896	5.64062	5.61146	5.17725	5.01201	4.34042	5.05623	4.51829	4.82662	4.55983	5.84128	4.56328	5.456	5.05175	5.58057	5.45439	5.94897	5.20082	4.91124	5.21522	4.80195	4.97251
4930449E01Rik	6.21762	5.56565	5.56463	5.15937	5.62102	5.74242	5.52273	5.44376	5.93361	5.79605	5.73077	6.03894	5.5205	5.55329	5.58573	5.42849	5.47777	5.71985	5.84154	5.6625	5.63634	5.59088	5.38334	5.75808
4930449I24Rik	4.7969	3.57663	3.99648	4.08755	3.5405	3.55675	4.00552	3.97601	3.80268	3.7659	4.09928	3.9207	3.93401	3.83649	3.98179	3.97088	3.93723	3.91296	4.72007	4.18915	4.10535	3.84818	4.04529	3.94448
4930451I11Rik	5.3502	5.97325	5.1015	4.03212	4.72009	4.90382	5.16352	5.00143	5.8626	5.14171	5.42665	5.82424	5.63152	5.12425	5.97648	5.56078	5.4353	5.50182	6.11672	5.15418	5.62287	4.53512	5.58189	5.26322
4930453H23Rik	4.81072	5.00544	4.62041	4.51429	4.29775	4.84786	4.65972	4.33495	4.57745	5.2485	4.68573	4.23936	4.6542	5.00061	4.17648	4.79185	4.42422	4.65263	4.89233	4.61217	4.47968	4.46608	4.39544	4.9348
4930453N24Rik	10.8835	11.0427	10.7174	11.1828	10.8485	10.8804	10.8256	10.6771	10.9519	10.9761	10.9402	10.9586	11.0312	11.0881	10.9304	11.026	10.8459	11.0604	10.6862	11.0708	10.9054	11.1193	10.9119	10.9774
4930455H04Rik	3.44328	2.8078	3.33406	3.03633	3.22634	2.99877	3.12078	4.01334	3.14712	3.06532	3.16483	3.38663	2.96107	3.53128	3.27758	3.42878	2.83957	3.10689	3.3181	3.2495	3.22032	3.09098	2.8349	3.03062
4930470P17Rik	2.96841	3.95637	3.66067	3.70575	3.12887	3.14729	3.39865	3.75545	3.67988	3.59495	3.8062	3.5724	3.63937	3.56765	3.86864	3.58038	3.63486	3.6634	3.66186	3.52516	3.43132	4.17346	3.51136	3.60328
4930474M22Rik	3.88741	4.09414	4.13731	3.86757	4.05823	3.60553	3.71666	3.8822	4.47186	3.79148	3.95151	4.25617	4.26135	3.69616	4.3274	4.09908	4.08967	3.79891	4.15021	3.94133	4.22569	3.87103	4.10193	4.01211
4930474N05Rik	3.54832	3.23495	3.35408	3.48283	3.45578	3.56769	3.56556	3.45195	3.62073	3.42248	3.6625	3.39936	3.19928	3.55952	3.48485	3.89184	3.23333	3.40533	3.59733	3.62834	3.46267	3.81423	3.38482	3.82959
4930480E11Rik	4.34637	3.99825	3.43899	4.30082	4.49444	3.5052	3.80281	4.37903	3.98103	4.07166	4.038	3.85364	4.08016	4.21526	3.88314	4.15163	4.09484	3.73107	4.38244	4.25796	3.82668	3.8864	4.21582	4.13135
4930481A15Rik	6.93791	7.21115	6.94254	7.02651	7.09185	6.99308	6.97212	7.67867	7.11239	7.02703	6.9643	6.76727	6.87261	5.60928	6.84244	6.71481	6.79549	5.76313	6.83371	7.10362	7.94629	6.87648	7.43572	8.05291
4930486L24Rik	4.44693	4.28824	4.65326	4.74584	5.29221	4.36165	4.37028	4.06696	5.15812	4.87122	4.81584	4.77101	4.65314	5.11624	4.58984	4.83553	4.83903	4.59692	5.15535	4.78596	4.6819	4.84212	4.36738	4.35287
4930503E14Rik	5.73908	5.2565	4.96516	4.87608	5.60033	5.34577	5.1284	5.65385	4.99011	4.81551	4.85762	5.30568	5.18688	5.15028	5.17272	5.37875	4.98269	5.1037	5.09278	4.49899	5.27361	5.04363	4.53552	4.81463
4930503L19Rik	7.27336	6.84368	7.12116	7.16671	6.67299	7.20013	7.08448	7.39143	7.37948	7.28543	7.9432	7.07137	6.59339	7.76176	7.23488	7.43945	7.60446	7.67957	7.33663	7.805	7.19954	7.20847	7.31349	6.95887
4930505A04Rik	4.02837	4.10624	3.81808	4.27968	3.96868	3.56718	3.94086	4.11924	3.82291	4.07912	4.01097	3.83878	4.00018	4.04338	4.1684	3.8536	3.96015	3.9622	4.44852	3.8591	4.0233	3.88307	3.77501	3.62284
4930507D05Rik	3.61837	3.33946	3.39742	3.28186	3.13394	2.72573	3.73196	3.59303	3.47562	3.64901	3.42204	3.89208	3.34202	3.45996	3.57767	3.38996	3.67534	3.62936	3.58201	3.76705	3.09389	3.39511	3.30091	3.61655
4930512B01Rik	6.21333	6.33321	6.40869	5.90764	6.40121	6.55109	6.65581	7.14904	6.46532	6.04079	6.4632	6.56318	6.45635	6.17711	6.02583	6.44287	6.20208	6.09127	6.48642	6.37014	6.56303	6.74502	6.19459	6.41313
4930512M02Rik	5.4892	5.47276	5.6588	4.76218	5.44391	5.29537	5.22071	5.35579	5.62348	4.90838	5.85824	5.5845	5.63881	5.35804	5.82724	5.87604	6.23132	5.74929	6.20098	5.55084	5.59259	5.44589	6.3155	5.45688
4930513O06Rik	5.51681	5.19269	5.34991	5.106	5.25408	5.27995	5.31138	5.57493	5.20017	5.47449	5.15931	5.1817	5.82486	5.17767	6.35904	5.19395	4.80138	5.28059	5.24313	5.56335	4.93602	5.89569	5.00537	5.07382
4930515G01Rik	5.39913	5.11461	4.77194	4.8014	5.18825	5.00208	5.09097	4.80644	4.6894	4.5362	4.65574	4.27957	4.76256	4.78089	4.70933	4.48318	4.69066	4.75157	5.07586	4.55489	4.88101	4.85866	4.90857	4.87277
4930519F16Rik	3.81883	3.77246	3.50536	3.20468	3.68689	3.83851	3.51646	3.38933	3.62314	3.15056	3.70108	3.37864	3.75804	3.62005	3.63003	3.56463	3.52026	3.85376	3.37273	3.62593	3.65852	4.03423	3.59918	3.72268
4930519G04Rik	4.20449	4.08471	3.93956	4.15116	3.93671	3.82396	4.05384	4.02206	4.31902	3.92723	4.66445	4.41021	4.20983	4.05024	4.29358	4.36596	4.24508	4.31382	4.50364	4.20682	4.17822	3.9261	4.26482	3.97942
4930522H14Rik	3.97038	3.9062	3.55209	3.73982	3.93777	4.01621	3.88022	4.08043	3.78932	3.9354	3.96486	4.11952	3.79153	4.33607	4.33482	3.68432	3.78564	3.89995	4.19485	3.95198	4.0358	3.99664	3.81602	3.88806
4930523C07Rik	7.04159	7.17831	6.66473	7.78033	7.2304	7.12461	7.17841	8.49717	7.93534	7.17708	7.85168	7.67331	7.29885	7.55348	7.00978	7.34076	7.43966	6.75318	7.04824	7.4348	7.90682	6.85455	7.62585	8.09281
4930524B15Rik	4.58329	4.60455	4.77584	4.48479	4.37787	4.20275	4.4337	4.79054	4.53588	4.36374	4.70591	4.95532	4.53471	4.59735	4.95788	4.68053	4.64497	4.75058	5.03563	4.40225	4.80309	4.38405	4.55211	5.38506
4930529C04Rik	6.02349	6.21615	6.66321	5.59714	6.3625	5.99152	6.27832	6.10024	6.32118	6.03683	6.05818	5.78651	5.85222	6.22546	6.48883	6.5615	6.56582	6.16155	6.1576	6.28664	6.11471	6.37759	6.11129	5.83935
4930544D05Rik	8.36819	8.55561	8.7935	8.70726	8.83716	8.75732	8.67962	8.8042	8.74443	9.05745	8.85328	9.14434	8.86001	8.77488	8.77465	8.80562	8.60588	8.99586	8.66541	8.5248	8.80625	8.49781	8.67616	8.71949
4930544G11Rik	4.6901	4.52823	4.78937	4.28176	4.44264	4.18941	4.37101	4.77776	5.3533	4.49527	4.63599	4.76942	4.89969	4.60595	5.38198	4.64879	4.67611	5.18945	5.2834	4.53009	4.90913	4.50116	4.76894	4.61786
4930546C10Rik	4.26175	4.53145	4.85832	4.2721	4.14694	4.31526	4.18104	4.3585	4.42506	4.47063	4.34625	4.66191	4.30429	4.35349	4.56698	4.39687	4.47816	4.83981	5.25614	4.8567	4.66284	4.43969	4.44645	3.84559
4930548G14Rik	4.63219	5.43827	5.333	4.77327	4.33052	5.05062	4.52196	4.47853	5.34972	5.36139	4.39259	4.58317	5.11467	4.84912	4.75234	4.71151	4.15357	5.13431	5.45064	4.36702	5.70065	4.90804	4.81054	4.50824
4930550C14Rik	5.92458	6.41106	6.32348	5.92059	6.17136	5.86392	6.64056	6.11804	6.8446	6.51478	6.31383	7.23885	6.22077	6.37842	7.05559	6.21115	6.63593	6.96885	6.96511	6.73472	6.89011	5.99735	6.01925	6.14379
4930555G01Rik	5.25484	5.33346	5.4451	5.50236	5.41542	5.34086	5.64136	5.62179	5.49408	5.23538	6.19764	5.49841	5.93298	5.06141	5.57071	5.50211	5.34031	6.07836	5.71642	5.77099	4.88364	5.84023	5.40224	5.27647
4930558K02Rik	5.63452	5.19761	5.45341	5.65411	5.79164	6.02704	5.75794	5.34892	5.75304	5.25966	5.68699	4.95724	5.13392	5.0648	5.96894	5.31859	5.44596	5.4212	4.33301	5.35471	5.78146	5.8943	5.42723	5.3569
4930562C15Rik	4.70608	4.74417	4.64039	4.96769	4.65014	4.59865	4.57221	5.1648	5.03646	4.29065	5.11904	4.905	4.96186	5.0572	4.69595	5.44494	4.51027	5.09099	5.38375	4.45804	4.85643	5.13533	4.69385	4.48428
4930562F07Rik	4.03625	3.90594	4.30117	4.00227	3.99767	4.13648	3.9846	4.66727	3.99152	3.60219	4.52284	4.46898	3.79499	4.28799	4.73167	4.14243	4.26991	4.35747	3.9864	3.97806	4.79859	4.20639	3.88458	4.09071
4930563E22Rik	3.58932	3.65342	3.81228	3.62155	3.85593	3.67917	3.68803	4.12602	4.01384	3.93232	3.76434	3.50302	4.11561	4.22128	3.88571	3.76661	3.89757	3.86799	4.20801	3.56997	4.09253	3.9289	3.94791	3.80537
4930563M21Rik	4.11712	4.9536	4.15498	4.65303	3.89855	4.20166	4.32888	3.8741	4.28641	4.18949	4.12717	4.47229	4.09321	4.55943	4.60903	4.55817	4.12578	4.14397	4.63092	4.28603	4.23137	4.48278	4.17141	4.30062
4930564C03Rik	4.30663	3.76004	3.59163	4.01194	3.68419	3.86081	3.81443	3.95344	3.9215	3.75756	4.03276	4.18726	3.954	3.7551	4.23409	3.87478	4.2609	3.83177	3.54106	3.87267	4.08498	3.3819	3.60353	3.91991
4930564D02Rik	4.45301	4.35838	4.20126	4.23822	4.30419	4.02742	3.78489	4.84209	4.05358	4.33487	4.14602	3.9474	4.71903	4.61458	4.43294	4.49519	3.69863	4.53866	4.38172	4.01769	4.08131	4.27759	4.05068	4.44254
4930565D16Rik	4.05804	3.57314	3.84536	3.60013	3.51563	3.49656	3.37878	3.56321	3.80934	3.61023	3.83559	3.80527	3.7476	3.34009	4.31592	3.55319	3.51914	4.30792	4.25645	3.87158	4.3323	3.53771	4.36935	3.61447
4930568D16Rik	3.88426	3.82617	4.00727	4.13577	4.1926	3.71586	4.08452	3.29995	3.68474	3.91041	4.29326	3.98024	3.76554	3.64006	3.89537	3.94525	3.77192	3.76716	4.25338	3.39119	3.70676	3.83021	3.50793	4.09068
4930571K23Rik	4.1537	3.83876	3.26438	3.63726	3.80418	4.11516	3.40985	3.47864	3.53174	4.14541	3.62438	3.72607	3.97811	3.87729	3.84653	3.54466	3.6186	3.39201	3.81961	3.70834	3.35249	3.7699	3.35331	3.93651
4930578I06Rik	5.36516	4.2036	4.26699	4.31218	4.41385	4.47255	4.29788	4.23864	4.72823	4.47187	4.61686	4.66475	4.87425	4.68811	4.51587	4.71415	4.06803	4.36129	4.19722	4.25345	4.47382	4.79181	3.97157	4.33156
4930579F01Rik	3.25987	3.17678	2.96057	3.00223	3.25078	3.07493	2.83809	3.13553	3.17334	3.00304	2.88903	3.15565	3.17618	3.26217	2.83945	2.93938	2.93352	3.45301	3.12191	2.82826	3.50796	3.11453	2.72179	2.82413
4930579G24Rik	5.61809	6.02404	5.83624	5.5569	5.66929	5.57295	5.39421	5.46166	4.82309	5.33973	5.87995	5.26545	5.15582	5.16491	5.40743	5.2254	5.92136	4.86651	5.63838	5.58161	5.38823	5.50605	5.09935	6.00231
4930579K19Rik	5.42945	5.38979	5.37543	5.65721	5.33353	5.50558	5.67834	5.37282	5.1555	5.01177	5.55159	5.28839	5.42896	5.19543	4.886	5.32327	5.36069	5.10153	4.84064	5.08659	5.59312	5.43994	5.47617	5.29129
4930583I09Rik	3.51482	3.9286	3.50558	3.19302	3.18296	3.50908	3.26283	3.69488	3.4596	3.29804	3.45263	3.53425	3.62172	3.41326	3.40235	3.64504	3.44152	3.28836	4.14758	3.75655	3.24101	3.4845	3.38885	3.88451
4930584F24Rik	4.92866	4.27909	4.81064	4.65101	4.56469	4.21537	4.79001	4.86284	4.5671	5.11515	4.73254	4.76551	4.11097	4.55624	5.64066	4.88094	4.40143	4.65658	4.4114	4.75632	4.96872	4.82812	4.65791	4.06825
4930590J08Rik	5.01109	4.42006	4.2924	4.16048	4.41382	4.82233	4.43162	3.93495	5.02239	3.80149	4.62645	5.00801	4.69231	5.0602	5.28127	4.87478	5.0336	4.84864	5.22419	4.7089	4.93662	4.88205	4.89008	4.16857
4930591A17Rik	5.15992	4.6577	4.81967	4.45915	5.34056	4.717	4.30395	5.09507	5.20655	4.25808	4.98367	4.58109	4.93082	4.38021	4.73946	4.96555	4.82208	4.27067	5.15371	5.11122	4.8821	4.22145	4.4929	3.9784
4930596D02Rik	3.79077	3.38719	3.39656	3.58815	3.42928	3.22525	3.3196	3.60576	3.54243	3.38257	3.73579	3.69415	3.48497	3.41445	3.63908	3.54335	2.9781	3.12456	3.60378	3.37923	3.35609	3.24518	3.35481	3.4271
4931406C07Rik	14.5434	14.9247	15.0981	15.3657	14.7715	15.1516	15.1351	14.8852	14.0872	14.2479	14.3159	14.2305	15.0819	14.5743	14.1027	14.5653	13.1177	14.0306	13.5644	13.6705	14.2195	14.1135	14.1544	14.1704
4931406H21Rik	7.83556	8.03825	8.04946	8.43581	7.65125	8.1223	7.44189	7.84062	8.13315	7.1895	7.76771	8.11072	7.50949	7.39451	7.45009	7.62309	6.81285	6.60147	6.89863	7.14771	7.88294	7.7669	7.86627	7.43504
4931414P19Rik	5.49605	5.17372	5.65283	5.2667	5.06846	5.02161	5.22066	5.47801	4.69103	4.46217	4.63005	4.81656	5.06949	4.6807	4.74429	4.4003	4.604	4.62016	4.98555	4.75268	4.78609	4.95207	4.89074	5.1363
4931429L15Rik	7.77444	6.8374	7.08904	6.71044	6.85117	6.74874	6.75588	6.5895	7.01911	6.69468	6.67512	7.11851	7.02056	7.01001	7.50692	7.09699	6.65045	6.77717	7.03623	7.03649	7.34153	6.67414	6.70197	6.58503
4931429P17Rik	4.62974	4.27868	4.26507	4.22707	4.26451	4.35958	4.13154	4.33777	3.96886	4.52253	4.05097	4.02879	4.45005	4.14509	4.71637	4.23349	4.1863	4.34144	4.14644	4.04675	4.22441	4.17742	4.26868	4.12846
4931440P22Rik	4.08415	4.89753	4.77524	4.34319	4.69825	4.37409	4.55083	4.44894	5.29812	4.87827	4.32862	4.80886	4.77458	4.59991	4.93311	4.90424	4.81452	4.73605	5.0308	4.97943	4.87339	4.42222	4.88541	4.90718
4932414J04Rik	4.704	4.88707	4.90499	5.10057	4.788	4.53239	5.03144	5.08063	4.79809	5.0148	4.81298	5.07928	5.0687	4.43646	5.14629	5.07186	5.29737	5.09663	5.07678	4.50428	5.06763	5.02744	4.79223	4.42069
4932414N04Rik	4.9303	5.08594	4.40708	4.25091	4.30164	4.56469	4.52845	3.92387	4.66041	4.5289	4.5084	5.03674	4.86959	4.58625	5.2534	4.71952	4.41837	4.78868	5.42469	4.65247	4.72851	4.06451	4.4613	4.79042
4932415M13Rik	4.61944	4.97652	3.96211	4.59963	4.30312	4.03503	4.47314	4.43838	4.57668	4.3195	4.81509	4.59355	4.62584	4.4544	4.62996	4.24115	4.53027	4.91136	5.29402	4.95916	4.84472	4.3363	4.78935	4.39636
4932416K20Rik	4.9917	4.81414	4.76373	4.91451	5.10994	4.76835	4.32856	4.7989	4.75588	5.48831	4.82583	5.09485	4.94246	4.54284	5.26175	4.70937	4.85093	4.60345	4.63725	4.45635	4.90394	5.31349	4.80065	4.61119
4933401B06Rik	4.50031	4.50306	4.43952	4.20103	4.44516	4.33831	4.02037	4.29495	4.63214	4.32968	4.10916	4.77287	4.69398	4.34464	4.58285	4.34528	4.47561	4.64499	4.38445	4.36872	4.42859	4.02378	4.86062	4.46055
4933402D24Rik	4.28422	3.94305	4.15182	4.01047	3.88462	3.56473	3.79603	4.42884	3.89573	3.44739	3.76506	3.70551	3.90943	3.75638	4.04117	3.64818	3.86415	3.73395	4.21829	4.10542	4.01434	4.02324	3.72417	3.44153
4933402J07Rik	5.96899	5.55092	5.61143	5.53496	5.57229	5.59718	5.43095	5.82021	5.53423	5.79635	5.89263	5.65989	5.62545	5.67669	6.21654	5.60753	5.43523	5.55044	5.86789	5.87254	5.48883	5.62367	5.20885	5.38258
4933402N03Rik	4.48541	4.22783	4.13616	4.20425	4.14586	4.34364	4.23116	4.21025	4.24335	3.9112	3.97514	4.50984	4.39245	4.23885	4.51389	4.82448	4.20892	4.12682	4.32355	4.20988	3.86646	3.90236	4.14788	3.58006
4933405L10Rik	4.30415	4.0236	3.83084	3.91668	4.02005	3.9884	4.09546	3.86895	4.09102	4.5	3.9527	4.21299	4.21485	4.11195	4.32722	3.96999	4.11859	3.81269	3.97216	4.06689	3.81244	3.81173	3.77367	3.7637
4933405O20Rik	4.80398	4.20422	4.45968	4.08113	4.51906	4.01542	4.33881	4.28995	4.27325	4.20993	4.28336	4.16085	4.583	4.23923	4.30396	4.15351	4.10141	4.07857	4.56623	4.57196	4.41929	4.02414	4.28769	4.66544
4933407L21Rik	6.38448	5.83902	5.73297	5.84362	6.19931	5.9635	5.98193	6.2385	5.7345	6.13974	5.77477	5.94426	5.7847	5.88336	6.42607	5.75545	5.62884	5.84593	5.6385	5.69677	5.85768	5.64423	5.81437	5.45164
4933408J17Rik	4.18994	4.08612	3.53222	3.74292	3.44242	3.68976	3.94864	3.75246	3.86799	3.73353	3.79386	3.70592	3.81695	3.80209	3.25873	3.36253	4.15762	3.81466	4.19929	3.80035	3.53427	3.46041	3.49223	3.76924
4933409G03Rik	6.22627	6.06065	6.01484	5.61888	6.12593	5.59652	5.83354	5.42697	6.0673	5.22391	5.30275	5.87549	5.92713	5.45078	6.23285	5.61756	6.10239	4.99403	6.24488	5.66254	5.65295	5.35201	5.32867	5.34182
4933409K07Rik	5.53001	5.82963	5.64979	5.81839	6.16006	5.89398	6.12078	5.46323	5.76245	6.42731	5.5381	5.33213	5.57387	5.96713	5.62978	5.58915	5.61792	5.92445	5.27849	5.37343	5.75708	5.749	6.2415	5.92033
4933411G06Rik	4.08141	4.18622	3.57547	3.90229	3.71234	3.56702	3.65202	4.46408	3.90166	4.15519	3.90358	3.95571	3.71462	3.79805	3.86644	3.65163	3.81491	4.06717	4.08448	4.09536	3.72118	3.54085	3.79051	3.37933
4933411K16Rik	4.90781	4.55063	4.43533	4.89393	4.78922	4.42377	4.65336	4.39084	4.88134	5.03953	4.55928	4.49849	4.70935	4.72165	4.61676	4.76192	4.75521	4.82545	5.23825	4.86524	4.71217	5.23824	4.96275	4.72433
4933412E24Rik	4.0034	3.86538	3.51297	3.63467	3.95933	3.41449	3.75965	3.96402	3.8109	3.97057	3.42107	3.57017	4.19399	3.52488	4.16181	3.79063	3.59784	4.10564	3.88952	3.64639	4.01866	3.88294	3.77203	4.19366
4933414I15Rik	6.32138	6.2653	5.99169	5.77324	6.17813	5.42095	5.73356	6.19524	6.50651	5.73936	5.93086	6.36799	6.46	5.89805	6.73271	6.32679	6.31957	6.1119	6.92795	6.40244	5.99582	5.94317	6.65982	5.83183
4933416I08Rik	5.13833	4.05765	4.14664	4.34071	4.54983	4.10977	3.7796	4.27406	3.8593	4.23507	4.18663	4.05	3.73409	4.13948	3.88786	4.24952	4.17361	4.00888	3.19852	3.72422	3.17053	3.91204	3.84471	4.45631
4933421I07Rik	4.62782	4.41739	4.20431	4.20476	4.59128	4.9461	4.59392	4.09389	4.26941	4.59265	4.58417	4.7651	4.30236	4.1567	4.56239	4.42773	4.40692	4.57186	4.58127	4.7309	4.58951	4.59444	4.24079	4.39347
4933427D06Rik	4.64442	4.8323	4.60854	4.8801	4.54709	4.4619	4.76856	4.53329	5.14178	4.69549	4.79034	4.84219	5.08999	4.92262	5.35731	4.99988	4.6212	4.80895	5.66582	4.82269	4.8654	4.69228	4.63985	4.65431
4933427D14Rik	7.92134	8.63185	9.05373	8.86216	8.38799	9.29159	8.32377	8.54874	7.73646	8.28832	7.9809	8.00304	7.78746	7.56093	8.22792	8.04499	8.53539	8.45366	8.00949	8.20524	8.57672	8.47749	8.45379	8.49184
4933427E11Rik	2.77796	3.06401	3.03935	3.13491	3.38914	2.85706	2.95147	3.04025	3.23282	2.89171	3.239	2.9922	3.88021	3.15155	2.8036	2.75646	2.92312	3.10406	2.85484	2.84843	3.01839	3.87838	3.39317	3.07074
4933428G20Rik	4.90229	4.73708	5.46781	4.95071	4.66628	4.42589	4.89039	4.76509	5.17697	4.76191	4.74631	5.05305	5.0071	4.64342	5.2817	4.74721	5.21526	4.84441	5.57247	4.57645	4.87128	4.75993	4.67516	5.00912
4933428M09Rik	5.29246	4.92286	5.14532	5.15887	4.8641	4.88712	4.82897	5.3218	4.89255	4.8368	4.53286	4.47997	4.74774	5.23453	5.05222	4.95897	5.1225	5.13508	5.0053	4.78859	4.79646	4.69147	5.01978	4.82135
4933430I17Rik	3.90536	3.93926	3.67176	3.7277	3.73838	3.38231	3.63388	3.93635	4.12567	3.67906	3.73162	4.03517	3.91942	3.69106	3.91723	3.99598	3.73059	3.79057	4.12126	3.83095	3.94154	3.72596	3.81534	4.02494
4933434E20Rik	10.1064	11.3945	11.0473	10.7572	10.886	11.0099	11.079	10.8673	10.3581	10.7714	10.6325	10.4985	10.5236	10.344	10.8046	10.7403	10.8207	10.8022	11.0436	11.0489	10.8868	10.7174	10.9622	10.9848
4933436I01Rik	3.98222	3.12536	3.13669	2.95029	3.53002	3.34628	3.10705	3.10831	3.62412	3.01281	3.20211	2.71897	3.58166	3.40458	3.07415	3.54783	3.03417	3.46688	2.83123	3.24747	3.21966	3.72395	3.06434	3.21215
4933440M02Rik	4.30896	3.38863	4.42652	4.21134	3.94012	3.61185	4.27168	3.9864	4.00502	3.93719	4.37769	4.02886	3.99464	3.93153	4.22539	4.18203	4.17827	3.72336	4.59646	4.03529	4.13509	3.70281	3.94738	3.77877
5031410I06Rik	4.89276	4.67833	4.84729	4.41187	5.15872	4.73491	5.19442	5.35976	4.95251	5.22227	4.83519	5.06866	5.06795	4.73652	5.27893	5.12007	4.82352	5.03713	5.08558	4.71305	5.29161	5.08586	4.83684	4.67092
5031425E22Rik	6.17793	8.08459	8.17594	8.10103	7.55012	7.87429	7.49236	8.08449	6.98093	7.03764	7.16901	6.89494	6.8892	7.08814	7.33348	7.32044	7.84687	7.39155	8.09427	7.97577	7.81855	7.41465	7.62292	7.71805
5031434C07Rik	4.11637	4.05022	3.71435	3.95576	4.33635	3.98085	3.98021	4.43483	4.35906	4.20654	3.89799	4.25941	4.87642	4.33892	4.18581	4.17757	4.35829	4.25174	4.31292	4.21705	4.06324	4.4068	4.12073	4.62157
5031439G07Rik	9.64466	10.5805	10.7962	11.093	11.4672	11.2493	11.0552	10.8364	11.0746	11.2251	11.5045	11.3424	10.9427	11.148	11.2811	11.2774	11.0015	11.1389	11.0777	10.8152	11.1417	11.3618	11.4671	11.3636
5330439B14Rik	5.21897	4.7919	4.54679	4.68058	4.54738	4.80476	4.46651	4.9232	5.87458	4.68193	4.52545	5.1031	4.96622	4.84497	5.06149	4.76923	5.00756	4.57779	5.43165	4.83238	5.40663	4.72218	5.19937	5.18351
5430401F13Rik	4.59954	4.2942	4.2108	4.31696	4.38152	4.42902	4.2177	4.57705	4.28048	4.34054	3.82111	4.20176	4.0488	4.00163	4.3413	4.06937	4.02211	4.44247	3.86142	4.40191	4.21896	4.70554	3.7987	4.22998
5430402E10Rik	7.22159	5.7556	5.40008	5.97603	6.108	5.79125	6.09938	5.83108	6.57958	6.44329	5.43718	5.90341	6.74713	6.30404	6.43294	5.95727	6.40924	5.99875	5.70416	6.10702	5.86822	6.34526	5.64551	5.88947
5430405H02Rik	8.95847	8.95248	8.85909	8.75521	9.20202	8.83375	9.14497	9.56608	8.73612	8.65717	9.36684	8.49349	8.93197	8.9936	8.82034	8.73775	8.95199	8.90422	8.50037	9.0751	9.18731	8.74049	9.03287	9.11246
5530400C23Rik	4.27783	3.75835	4.06539	4.06655	3.79917	3.94122	4.17258	3.92086	3.94887	4.49149	4.2801	4.11035	4.01381	4.02592	4.04514	4.56684	4.01183	3.82438	4.12844	3.69414	4.01315	3.69497	4.09388	3.95126
5530401A14Rik	3.86168	3.3975	3.26376	3.73959	3.27116	3.24156	3.29124	3.64165	3.44118	3.34586	3.21612	3.40271	3.27229	3.20403	3.42268	3.26952	3.72921	3.22485	3.09536	3.30956	3.28152	3.32725	3.59515	3.29464
5730409E04Rik	5.97959	5.73257	5.41732	5.65997	6.16729	5.54982	5.76265	5.8386	5.83875	5.45285	5.78439	5.7897	5.80718	5.38285	5.9856	5.49254	5.81103	5.52126	5.8836	5.53026	5.90207	5.60996	5.61793	5.38617
5730455P16Rik	6.67238	7.32804	7.44566	7.37301	7.17736	7.23234	7.39933	7.50263	7.23032	7.55721	7.75861	7.24962	7.62465	7.50111	7.51138	7.27752	8.01473	7.51818	7.25512	7.44584	7.79943	7.75939	8.0122	7.62778
5730460C07Rik	4.35933	4.31292	4.55116	4.50861	4.74475	4.50563	4.3409	4.76255	4.75937	4.57546	4.23404	4.96485	4.6015	4.66179	4.53234	4.57175	4.7145	4.85998	4.42128	4.91382	4.92223	4.70778	4.2624	4.38579
5730480H06Rik	5.40321	5.7758	6.06342	5.89158	5.17903	5.54462	5.92888	6.0587	4.70699	4.66161	5.93672	5.34647	5.19201	4.84501	5.33642	5.19773	5.99877	5.40182	4.51126	5.49763	5.54306	5.48068	5.83437	6.13863
5730507C01Rik	11.6325	11.0892	11.293	11.0631	10.9122	10.546	10.653	10.3566	9.99381	10.0275	10.0181	10.1465	9.94499	10.0814	10.1278	10.1048	10.0565	10.4167	9.78107	10.5924	10.4471	10.6278	10.4239	10.3552
5730522E02Rik	5.55087	5.1848	5.26113	4.87815	5.03419	4.29115	5.03852	5.00138	5.57272	5.33601	5.28802	5.83331	5.72116	5.00398	5.54826	5.86343	5.70879	5.62553	5.96799	5.40728	5.42333	4.73938	5.6484	4.75814
5830417I10Rik	10.3383	10.4299	10.5105	10.5181	10.291	10.6062	10.3506	10.728	9.32301	9.74987	9.71457	9.75362	9.57166	9.94856	9.36926	10.0352	10.3089	10.4278	10.4485	10.3781	10.4406	10.7083	10.6219	10.6977
5830454E08Rik	4.70686	4.92218	5.01015	4.68171	4.5794	4.23543	4.84731	4.78462	4.89492	4.52005	4.61094	4.80236	4.83321	4.3464	4.84203	4.81846	4.8537	4.67382	5.16381	4.74536	4.92963	4.49173	4.93012	4.80805
5930403L14Rik	3.65118	3.30337	3.43066	3.34863	3.03197	3.31742	3.60158	3.22625	3.20399	3.24099	3.14355	3.11991	4.10689	3.20932	3.57594	3.26885	3.28243	3.30985	3.89302	3.44664	4.1128	3.19542	3.60153	3.12586
6030458C11Rik	7.03439	7.54679	7.43469	7.42393	7.54666	7.53747	7.22791	7.40226	7.40019	7.24371	6.94417	7.3388	7.18105	7.41742	6.78561	7.30706	7.33257	7.30694	7.26439	7.92453	7.41741	7.74193	7.3921	7.25892
6030468B19Rik	5.38897	4.56711	4.57435	4.63774	4.64921	4.57515	4.32693	4.43708	4.42199	4.91375	4.52123	4.58075	4.56195	4.47094	4.9015	4.64872	4.59119	4.78425	4.92593	4.78982	5.05135	4.50855	4.70273	4.81236
6030469F06Rik	7.72237	7.69411	7.56452	7.49744	7.75138	7.55676	7.47568	7.57935	7.7639	7.83079	7.86225	7.90203	7.77174	7.69653	8.22265	7.92406	7.76351	7.80212	7.72693	7.85927	8.13388	7.62257	7.59415	7.44144
6030498E09Rik	5.88277	5.93361	5.28582	5.3426	5.00831	4.70774	4.8348	5.21071	5.61272	5.38029	5.64713	5.77949	5.76926	5.70393	6.2786	5.99638	5.68114	5.98343	6.13316	5.49277	6.2598	5.39207	5.06538	5.59256
[truncated: 20,533 more rows]

## Sheet: Heatmap grouping
id	GSM2539097	GSM2539098	GSM2539099	GSM2539100	GSM2539105	GSM2539106	GSM2539107	GSM2539108
[truncated: 1,027 more rows]
