# Supplementary material for: Identification of autophagy-related genes in intestinal ischemia-reperfusion injury and their role in immune infiltration
Source: Front Physiol. 2025 May 26;16:1601968. doi: 10.3389/fphys.2025.1601968 (PMC12146356; doi:10.3389/fphys.2025.1601968)
Supplement: Supplementary file 3 [file Table10.xls]

## Sheet: raw date
Grouping	original number	Self numbering	mean CT score						2^-△△Ct
			β-actin	Sqstm1	Myc	Hif1a	Gabarapl1	Zfyve1	Sqstm1	Myc	Hif1a	Gabarapl1	Zfyve1
Sham	542	1	22.46	31.3	31.77	27.73	32.21	29.2	1	1	1	1	1
	544	2	22.3	31	31.52	27.79	31.81	29.34	1.10191	1.06437	0.858565	1.18099	0.812252
	545	3	22.31	31.11	31.31	27.82	31.83	29.14	1.02811	1.23971	0.846745	1.17283	0.939523
II/R	514	4	22.4	29.23	29.17	25.73	31.23	26.86	4.02782	5.81589	3.83706	1.89212	4.85678
	517	5	22.31	29.04	29.29	25.78	30.74	26.86	4.31691	5.02805	3.4822	2.49666	4.56305
	518	6	22.23	28.73	29.33	25.82	30.76	26.87	5.06303	4.62675	3.20428	2.32947	4.28709
				8.84	9.31	5.27	9.75	6.74
