# Supplementary material for: Identification of autophagy-related genes in intestinal ischemia-reperfusion injury and their role in immune infiltration
Source: Front Physiol. 2025 May 26;16:1601968. doi: 10.3389/fphys.2025.1601968 (PMC12146356; doi:10.3389/fphys.2025.1601968)
Supplement: Supplementary file 4 [file Table4.xls]

## Sheet: string_interactions
#node1	node2	node1_string_id	node2_string_id	neighborhood_on_chromosome	gene_fusion	phylogenetic_cooccurrence	homology	coexpression	experimentally_determined_interaction	database_annotated	automated_textmining	combined_score
Bag3	Sqstm1	10090.ENSMUSP00000033136	10090.ENSMUSP00000099835	0	0	0	0	0.079	0.281	0	0.66	0.755
Bag3	Hspb8	10090.ENSMUSP00000033136	10090.ENSMUSP00000037007	0	0	0	0	0.307	0.637	0.72	0.997	0.999
Gabarapl1	Zfyve1	10090.ENSMUSP00000032264	10090.ENSMUSP00000152501	0	0	0	0	0.128	0.082	0	0.339	0.425
Gabarapl1	Sqstm1	10090.ENSMUSP00000032264	10090.ENSMUSP00000099835	0	0	0	0	0.196	0.508	0.9	0.664	0.984
Hif1a	Sphk1	10090.ENSMUSP00000021530	10090.ENSMUSP00000131010	0	0	0	0	0	0	0	0.411	0.411
Hif1a	Sqstm1	10090.ENSMUSP00000021530	10090.ENSMUSP00000099835	0	0	0	0	0.054	0.093	0	0.457	0.493
Hif1a	Myc	10090.ENSMUSP00000021530	10090.ENSMUSP00000022971	0	0	0	0	0.098	0.38	0	0.933	0.959
Hspb8	Bag3	10090.ENSMUSP00000037007	10090.ENSMUSP00000033136	0	0	0	0	0.307	0.637	0.72	0.997	0.999
Hspb8	Sqstm1	10090.ENSMUSP00000037007	10090.ENSMUSP00000099835	0	0	0	0	0.082	0.061	0	0.502	0.533
Myc	Hif1a	10090.ENSMUSP00000022971	10090.ENSMUSP00000021530	0	0	0	0	0.098	0.38	0	0.933	0.959
Myc	Rb1	10090.ENSMUSP00000022971	10090.ENSMUSP00000022701	0	0	0	0	0	0.213	0	0.456	0.553
Myc	Sqstm1	10090.ENSMUSP00000022971	10090.ENSMUSP00000099835	0	0	0	0	0.047	0.066	0	0.382	0.402
Rb1	Myc	10090.ENSMUSP00000022701	10090.ENSMUSP00000022971	0	0	0	0	0	0.213	0	0.456	0.553
Sphk1	Hif1a	10090.ENSMUSP00000131010	10090.ENSMUSP00000021530	0	0	0	0	0	0	0	0.411	0.411
Sqstm1	Hif1a	10090.ENSMUSP00000099835	10090.ENSMUSP00000021530	0	0	0	0	0.054	0.093	0	0.457	0.493
Sqstm1	Myc	10090.ENSMUSP00000099835	10090.ENSMUSP00000022971	0	0	0	0	0.047	0.066	0	0.382	0.402
Sqstm1	Gabarapl1	10090.ENSMUSP00000099835	10090.ENSMUSP00000032264	0	0	0	0	0.196	0.508	0.9	0.664	0.984
Sqstm1	Bag3	10090.ENSMUSP00000099835	10090.ENSMUSP00000033136	0	0	0	0	0.079	0.281	0	0.66	0.755
Sqstm1	Hspb8	10090.ENSMUSP00000099835	10090.ENSMUSP00000037007	0	0	0	0	0.082	0.061	0	0.502	0.533
Sqstm1	Zfyve1	10090.ENSMUSP00000099835	10090.ENSMUSP00000152501	0	0	0	0	0.071	0	0	0.511	0.526
Zfyve1	Gabarapl1	10090.ENSMUSP00000152501	10090.ENSMUSP00000032264	0	0	0	0	0.128	0.082	0	0.339	0.425
Zfyve1	Sqstm1	10090.ENSMUSP00000152501	10090.ENSMUSP00000099835	0	0	0	0	0.071	0	0	0.511	0.526

## Sheet: Degree
Top 9 in network string_interactions_short%20(7).tsv ranked by Degree method
Rank	Name	Score
1	Sqstm1	6
2	Myc	3
2	Hif1a	3
4	Gabarapl1	2
4	Zfyve1	2
4	Bag3	2
4	Hspb8	2
8	Rb1	1
8	Sphk1	1

## Sheet: Closeness
Top 9 in network string_interactions_short%20(7).tsv ranked by Closeness method
Rank	Name	Score
1	Sqstm1	7
2	Myc	5.5
2	Hif1a	5.5
4	Gabarapl1	4.666666666666666
4	Zfyve1	4.666666666666666
4	Bag3	4.666666666666666
4	Hspb8	4.666666666666666
8	Rb1	3.666666666666667
8	Sphk1	3.666666666666667

## Sheet: Betweenness
Top 9 in network string_interactions_short%20(7).tsv ranked by Betweenness method
Rank	Name	Score
1	Sqstm1	40
2	Myc	14
2	Hif1a	14
4	Gabarapl1	0
4	Zfyve1	0
4	Bag3	0
4	Hspb8	0
4	Rb1	0
4	Sphk1	0

## Sheet: Heatmap grouping
#group	Sham	Sham	Sham	Sham	II/R	II/R	II/R	II/R
id	GSM2539097	GSM2539098	GSM2539099	GSM2539100	GSM2539105	GSM2539106	GSM2539107	GSM2539108
Myc	11.6111	11.0758	11.324	11.0458	13.0419	14.1827	14.2459	13.5108
Hif1a	13.5467	13.8303	13.9198	13.9375	15.0178	14.9328	15.0178	15.0467
Zfyve1	10.4237	10.657	10.7133	10.3058	9.21387	9.71958	9.32836	9.50482
Sqstm1	12.5645	13.1323	12.9566	12.8778	14.2609	13.8857	13.8024	13.7983
Gabarapl1	10.3902	10.8514	10.8312	11.0475	12.4649	11.6874	11.4376	11.9223
