# Supplementary material for: Identification of autophagy-related genes in intestinal ischemia-reperfusion injury and their role in immune infiltration
Source: Front Physiol. 2025 May 26;16:1601968. doi: 10.3389/fphys.2025.1601968 (PMC12146356; doi:10.3389/fphys.2025.1601968)
Supplement: Supplementary file 5 [file Table2.xls]

## Sheet: GO
ONTOLOGY	ID	Description	GeneRatio	BgRatio	RichFactor	FoldEnrichment	zScore	pvalue	p.adjust	qvalue	geneID	Count
BP	GO:0006935	chemotaxis	77/997	481/28928	0.160083	4.64482	15.2295	1.09125e-29	3.96958e-26	2.33393e-26	Thbs1/Ch25h/Tnfaip6/S100a8/Ccl2/Hspb1/Pde4b/Nrg1/Cxcl5/Cxcl2/Ccl3/Ccr1/Sema7a/Cxcl1/S100a9/Ccn1/Retnlg/Csf1/Ccr8/Fgfr1/Adam8/Nr4a1/Epha7/Ccn3/Pgf/Sema6a/Epha2/Fgf2/S100a14/Ninj1/Sema6b/Abcc1/Cysltr1/Ntf3/Cx3cr1/Anxa1/Csf3r/Gpr35/Ccl7/Tubb2b/Ackr3/Eng/Ccrl2/Fcgr3/Flt1/Dusp1/Sema4a/Xcr1/Trem1/Ccl11/Il1b/Il34/Cxcl16/Sema4c/Ptafr/Agrn/Edn1/Cxcr2/Ccr5/Sema6d/C5ar1/Pf4/Cxcl3/Serpine1/Flrt2/S1pr1/Fpr1/C…	77
BP	GO:0042330	taxis	77/997	483/28928	0.15942	4.62559	15.1812	1.44822e-29	3.96958e-26	2.33393e-26	Thbs1/Ch25h/Tnfaip6/S100a8/Ccl2/Hspb1/Pde4b/Nrg1/Cxcl5/Cxcl2/Ccl3/Ccr1/Sema7a/Cxcl1/S100a9/Ccn1/Retnlg/Csf1/Ccr8/Fgfr1/Adam8/Nr4a1/Epha7/Ccn3/Pgf/Sema6a/Epha2/Fgf2/S100a14/Ninj1/Sema6b/Abcc1/Cysltr1/Ntf3/Cx3cr1/Anxa1/Csf3r/Gpr35/Ccl7/Tubb2b/Ackr3/Eng/Ccrl2/Fcgr3/Flt1/Dusp1/Sema4a/Xcr1/Trem1/Ccl11/Il1b/Il34/Cxcl16/Sema4c/Ptafr/Agrn/Edn1/Cxcr2/Ccr5/Sema6d/C5ar1/Pf4/Cxcl3/Serpine1/Flrt2/S1pr1/Fpr1/C…	77
BP	GO:0050727	regulation of inflammatory response	66/997	403/28928	0.163772	4.75184	14.3298	3.65326e-26	6.67573e-23	3.92501e-23	Tnfaip6/S100a8/Sphk1/Il6/Ccl3/Sbno2/Socs3/Map3k8/Ada/Nfkbia/Sema7a/Gpr4/S100a9/Ier3/Tnfrsf1b/Cd44/Il10/Nlrp1b/Nlrp9b/Adam8/Il1rl2/Ctla2a/Ccn3/Gpr31b/Il1r1/Foxf1/Ninj1/Abcc1/Arel1/Cx3cr1/Anxa1/Cdh5/Ptges/Ptgs2/Rb1/Fndc4/Rabgef1/Bcr/C2cd4b/Il20rb/Fcgr3/Mfhas1/Cd200l1/Il1b/Cebpb/Gbp2b/Tnfaip3/Acod1/Ccr5/Sting1/Pf4/Mmp8/Serpine1/Ppara/Nt5e/Fcgr2b/Ednrb/Gbp2/Tnc/Trim65/Fcer1g/Tac1/Osm/Il1rl1/Napepld/I…	66
BP	GO:0002237	response to molecule of bacterial origin	73/997	494/28928	0.147773	4.28765	13.9247	5.62654e-26	7.71117e-23	4.53381e-23	S100a8/Lilrb4a/Ccl2/Pde4b/Cxcl5/Il6/Cxcl2/Sbno2/Akap12/Nfkbia/Trib1/Csf3/Cxcl1/Tnfrsf1b/Havcr2/Cd14/Trim30d/Il10/Irak3/Nr4a1/Thbd/Gpr31b/S100a14/Cx3cr1/Vim/Bdkrb1/Axl/Ptgs2/Cd80/Adm/Bcr/Trim12c/Il1a/F2r/Arid5a/Plscr1/Cd86/Map2k3/Il1b/Capn2/Ogt/Cxcl16/Cebpb/Nos2/Ptafr/Edn1/Gbp2b/Tnfaip3/Gja1/Acod1/Ccr5/Tnip2/C5ar1/Pf4/Mmp8/Inava/Cxcl3/Serpine1/Tspo/Slc11a1/Cxcl10/Fcgr2b/Ednrb/Slc7a5/Trim6/Gbp2/Tir…	73
BP	GO:0060326	cell chemotaxis	59/997	337/28928	0.175074	5.07979	14.2329	4.78822e-25	5.24981e-22	3.08664e-22	Thbs1/Ch25h/Tnfaip6/S100a8/Ccl2/Hspb1/Pde4b/Cxcl5/Cxcl2/Ccl3/Ccr1/Cxcl1/S100a9/Retnlg/Csf1/Ccr8/Fgfr1/Adam8/Nr4a1/Ccn3/Pgf/Epha2/Fgf2/S100a14/Ninj1/Abcc1/Cx3cr1/Anxa1/Csf3r/Gpr35/Ccl7/Ackr3/Eng/Ccrl2/Fcgr3/Flt1/Dusp1/Xcr1/Trem1/Ccl11/Il1b/Il34/Cxcl16/Edn1/Cxcr2/Ccr5/C5ar1/Pf4/Cxcl3/Serpine1/S1pr1/Cxcl10/Ednrb/Tirap/Hoxb9/Pla2g7/Fcer1g/Lox/Il17ra	59
BP	GO:0050900	leukocyte migration	64/997	409/28928	0.156479	4.54025	13.6234	2.77454e-24	2.535e-21	1.49046e-21	Thbs1/Ch25h/Tnfaip6/S100a8/Selp/Ccl2/Pde4b/Cxcl5/Cxcl2/Ccl3/Abl2/Ccr1/Ada/Cxcl1/S100a9/Icam1/Retnlg/Sele/Csf1/Ripk3/Adam8/Ccn3/Pgf/Il1r1/S100a14/Ninj1/Cx3cr1/Anxa1/Csf3r/Bdkrb1/Gpr35/Ccl7/Rabgef1/Bcr/Asb2/Il1a/Fcgr3/Flt1/Tacr1/Dusp1/Trem1/Ccl11/Il1b/Il34/Cxcl16/Lyve1/Plvap/Dock8/Ptafr/Edn1/Cxcr2/C5ar1/Pf4/Gcnt1/Cxcl3/Serpine1/S1pr1/Cxcl10/Ednrb/Tirap/Ecm1/Pla2g7/Fcer1g/Il17ra	64
BP	GO:0032496	response to lipopolysaccharide	69/997	476/28928	0.144958	4.20596	13.3248	4.10918e-24	3.21808e-21	1.89208e-21	S100a8/Lilrb4a/Ccl2/Pde4b/Cxcl5/Il6/Cxcl2/Sbno2/Akap12/Nfkbia/Trib1/Csf3/Cxcl1/Tnfrsf1b/Havcr2/Cd14/Trim30d/Il10/Irak3/Nr4a1/Thbd/S100a14/Cx3cr1/Vim/Bdkrb1/Axl/Ptgs2/Cd80/Adm/Bcr/Trim12c/Il1a/F2r/Arid5a/Plscr1/Cd86/Map2k3/Il1b/Capn2/Ogt/Cxcl16/Cebpb/Nos2/Ptafr/Edn1/Gbp2b/Tnfaip3/Gja1/Acod1/Ccr5/Tnip2/Pf4/Mmp8/Cxcl3/Serpine1/Tspo/Slc11a1/Cxcl10/Ednrb/Slc7a5/Trim6/Gbp2/Tirap/Cd180/Havcr1/Nfkb2/Cmpk…	69
BP	GO:0045765	regulation of angiogenesis	55/997	319/28928	0.172414	5.00259	13.5813	4.2747e-23	2.92924e-20	1.72225e-20	Thbs1/Adamts1/Itga5/Tnfrsf12a/Sphk1/Hmox1/Ccl2/Hspb1/Gpr4/Spry2/Il10/Adamts9/Hif1a/Glul/Pgf/Sema6a/Epha2/Fgf2/Runx1/Rhoj/Ninj1/F3/Cysltr1/Cx3cr1/Cdh5/Tlr3/Rnh1/Cemip2/Rgcc/Plk2/Adm/Eng/Il1a/Flt1/Sema4a/Stard13/Ccl11/Il1b/Cd160/Cxcr2/Spred1/C5ar1/Pf4/Tgfbr2/Serpine1/Anxa3/Gadd45a/Cxcl10/Adrb2/Lif/Ecm1/Sp100/Zc3h12a/Gata4/Id1	55
BP	GO:1901342	regulation of vasculature development	55/997	326/28928	0.168712	4.89518	13.3627	1.25551e-22	7.64742e-20	4.49633e-20	Thbs1/Adamts1/Itga5/Tnfrsf12a/Sphk1/Hmox1/Ccl2/Hspb1/Gpr4/Spry2/Il10/Adamts9/Hif1a/Glul/Pgf/Sema6a/Epha2/Fgf2/Runx1/Rhoj/Ninj1/F3/Cysltr1/Cx3cr1/Cdh5/Tlr3/Rnh1/Cemip2/Rgcc/Plk2/Adm/Eng/Il1a/Flt1/Sema4a/Stard13/Ccl11/Il1b/Cd160/Cxcr2/Spred1/C5ar1/Pf4/Tgfbr2/Serpine1/Anxa3/Gadd45a/Cxcl10/Adrb2/Lif/Ecm1/Sp100/Zc3h12a/Gata4/Id1	55
BP	GO:0071216	cellular response to biotic stimulus	59/997	378/28928	0.156085	4.5288	13.0475	2.03625e-22	1.11627e-19	6.56316e-20	Lilrb4a/Ccl2/Pde4b/Cxcl5/Il6/Cxcl2/Sbno2/Nfkbia/Trib1/Csf3/Bcl2l11/Cxcl1/Tnfrsf1b/Havcr2/Cd14/Trim30d/Il10/Irak3/Cx3cr1/Vim/Axl/Ptgs2/Cd80/Bcr/Trim12c/Il1a/Arid5a/Plscr1/Cd86/Map2k3/Il1b/Capn2/Ogt/Cxcl16/Cebpb/Nos2/Ptafr/Gbp2b/Tnfaip3/Acod1/Ccr5/Tnip2/Pf4/Mmp8/Cxcl3/Serpine1/Tspo/Cxcl10/Fcgr2b/Ednrb/Slc7a5/Gbp2/Clec7a/Tirap/Cd180/Cmpk2/Zc3h12a/Traf6/Cda	59
BP	GO:0071219	cellular response to molecule of bacterial origin	56/997	349/28928	0.160458	4.65571	12.9813	6.26592e-22	3.12271e-19	1.836e-19	Lilrb4a/Ccl2/Pde4b/Cxcl5/Il6/Cxcl2/Sbno2/Nfkbia/Trib1/Csf3/Cxcl1/Tnfrsf1b/Havcr2/Cd14/Trim30d/Il10/Irak3/Cx3cr1/Vim/Axl/Ptgs2/Cd80/Bcr/Trim12c/Il1a/Arid5a/Plscr1/Cd86/Map2k3/Il1b/Capn2/Ogt/Cxcl16/Cebpb/Nos2/Ptafr/Gbp2b/Tnfaip3/Acod1/Ccr5/Tnip2/Pf4/Mmp8/Cxcl3/Serpine1/Tspo/Cxcl10/Fcgr2b/Ednrb/Slc7a5/Gbp2/Tirap/Cd180/Cmpk2/Zc3h12a/Traf6	56
BP	GO:0071222	cellular response to lipopolysaccharide	54/997	340/28928	0.158824	4.60827	12.6445	5.60742e-21	2.56166e-18	1.50613e-18	Lilrb4a/Ccl2/Pde4b/Cxcl5/Il6/Cxcl2/Sbno2/Nfkbia/Trib1/Csf3/Cxcl1/Tnfrsf1b/Havcr2/Cd14/Trim30d/Il10/Irak3/Cx3cr1/Vim/Axl/Ptgs2/Cd80/Bcr/Trim12c/Il1a/Arid5a/Plscr1/Cd86/Map2k3/Il1b/Capn2/Ogt/Cxcl16/Cebpb/Nos2/Ptafr/Gbp2b/Tnfaip3/Acod1/Ccr5/Tnip2/Pf4/Mmp8/Cxcl3/Serpine1/Tspo/Cxcl10/Ednrb/Slc7a5/Gbp2/Cd180/Cmpk2/Zc3h12a/Traf6	54
BP	GO:0030595	leukocyte chemotaxis	45/997	243/28928	0.185185	5.37316	12.9338	2.09892e-20	8.851e-18	5.20397e-18	Thbs1/Ch25h/Tnfaip6/S100a8/Ccl2/Pde4b/Cxcl5/Cxcl2/Ccl3/Ccr1/Cxcl1/S100a9/Retnlg/Csf1/Adam8/Ccn3/Pgf/S100a14/Ninj1/Cx3cr1/Anxa1/Csf3r/Gpr35/Ccl7/Fcgr3/Flt1/Dusp1/Trem1/Ccl11/Il1b/Il34/Cxcl16/Edn1/Cxcr2/C5ar1/Pf4/Cxcl3/Serpine1/S1pr1/Cxcl10/Ednrb/Tirap/Pla2g7/Fcer1g/Il17ra	45
BP	GO:0097529	myeloid leukocyte migration	46/997	256/28928	0.179688	5.21364	12.7939	2.83326e-20	1.10942e-17	6.52289e-18	Thbs1/Tnfaip6/S100a8/Ccl2/Pde4b/Cxcl5/Cxcl2/Ccl3/Ccr1/Cxcl1/S100a9/Retnlg/Csf1/Adam8/Ccn3/Pgf/Il1r1/S100a14/Ninj1/Cx3cr1/Anxa1/Csf3r/Gpr35/Ccl7/Rabgef1/Bcr/Il1a/Fcgr3/Flt1/Dusp1/Trem1/Ccl11/Il1b/Il34/Edn1/Cxcr2/C5ar1/Pf4/Cxcl3/Serpine1/Cxcl10/Ednrb/Tirap/Pla2g7/Fcer1g/Il17ra	46
BP	GO:0002833	positive regulation of response to biotic stimulus	60/997	434/28928	0.138249	4.0113	11.942	4.56369e-20	1.66788e-17	9.80633e-18	S100a8/Nfkbia/Cxcl1/Ifi207/S100a9/Havcr2/Cd14/Fosl1/Trim30d/Ereg/Polr3g/Irak3/Hspa1b/Nlrp1b/Adam8/Pvr/S100a14/Ninj1/Tlr13/Rnf170/Tlr3/Il18rap/Hexim1/Atat1/Trim12c/Irf4/Mfhas1/Plscr1/Cd86/Sqstm1/Ogt/Tril/Rab7b/Cd160/Znrf1/Gbp2b/Tnfaip3/Acod1/Sting1/Cpt1a/Tnip2/Slc15a3/Clec4e/Ifi213/Inava/Tlr8/Mavs/Trim6/Rasgrp1/Gbp2/Clec7a/Gsdme/Tirap/Cd180/Ifi211/Mmp12/Sin3a/Prkdc/Traf6/Ifi204	60
BP	GO:0045088	regulation of innate immune response	64/997	496/28928	0.129032	3.74388	11.6455	9.66062e-20	3.30997e-17	1.94611e-17	S100a8/Ccr1/Nfkbia/Ifi207/S100a9/Havcr2/Cd14/Fosl1/Trim30d/Ereg/Polr3g/Irak3/Hspa1b/Nlrp1b/Adam8/Pvr/S100a14/Ninj1/Tlr13/Rnf170/Tlr3/Il18rap/Hexim1/Atat1/Trim12c/Irf4/Mfhas1/Plscr1/Cd86/Sqstm1/Ogt/Tril/Rab7b/Cd160/Znrf1/Gbp2b/Tnfaip3/Acod1/Sting1/Cpt1a/Tnip2/Sfn/Slc15a3/Clec4e/Ifi213/Inava/Tlr8/Parp14/Stat2/Mavs/Pim1/Trim6/Rasgrp1/Gbp2/Klrb1b/Clec7a/Tirap/Lrp8/Ifi211/Mmp12/Sin3a/Prkdc/Traf6/Ifi204	64
BP	GO:0045089	positive regulation of innate immune response	57/997	404/28928	0.141089	4.09371	11.831	1.51179e-19	4.87507e-17	2.86631e-17	S100a8/Nfkbia/Ifi207/S100a9/Havcr2/Cd14/Fosl1/Trim30d/Ereg/Polr3g/Irak3/Hspa1b/Nlrp1b/Adam8/Pvr/S100a14/Ninj1/Tlr13/Rnf170/Tlr3/Il18rap/Hexim1/Atat1/Trim12c/Irf4/Mfhas1/Plscr1/Cd86/Sqstm1/Ogt/Tril/Rab7b/Cd160/Znrf1/Gbp2b/Tnfaip3/Acod1/Sting1/Cpt1a/Tnip2/Slc15a3/Clec4e/Ifi213/Inava/Tlr8/Mavs/Trim6/Rasgrp1/Gbp2/Clec7a/Tirap/Ifi211/Mmp12/Sin3a/Prkdc/Traf6/Ifi204	57
BP	GO:0002274	myeloid leukocyte activation	46/997	279/28928	0.164875	4.78384	11.9988	1.01457e-18	3.08994e-16	1.81674e-16	Thbs1/Lilrb4b/Sphk1/Hmox1/Lilrb4a/Nr4a3/Il4ra/Cxcl5/Ccl3/Sbno2/Havcr2/D6Wsu163e/Il10/Stx11/Foxf1/Cx3cr1/Anxa1/Tlr3/Il18rap/Gab2/Rabgef1/Bcr/Fcgr3/Irf4/Adgrf5/Mfhas1/Plscr1/Pld2/Batf2/Ndrg1/Clec4d/Il15/Ptafr/Jund/Cxcr2/Tnip2/C5ar1/Mmp8/Tgfbr2/Anxa3/Slc11a1/Rasgrp1/Havcr1/Fcer1g/Il1rl1/Traf6	46
BP	GO:0002685	regulation of leukocyte migration	43/997	257/28928	0.167315	4.85466	11.727	7.86742e-18	2.26996e-15	1.33463e-15	Thbs1/Tnfaip6/Selp/Ccl2/Ccl3/Abl2/Ccr1/Ada/Icam1/Sele/Csf1/Ripk3/Adam8/Ccn3/Pgf/Il1r1/S100a14/Ninj1/Cx3cr1/Anxa1/Bdkrb1/Ccl7/Rabgef1/Bcr/Il1a/Tacr1/Dusp1/Trem1/Il1b/Il34/Lyve1/Plvap/Dock8/Ptafr/Edn1/Cxcr2/C5ar1/Gcnt1/Serpine1/Cxcl10/Tirap/Ecm1/Pla2g7	43
BP	GO:0070371	ERK1 and ERK2 cascade	50/997	362/28928	0.138122	4.0076	10.8794	6.51574e-17	1.78596e-14	1.05006e-14	Nrg1/Errfi1/Il6/Ccl3/Abl2/Ccr1/Akap12/Dab2/Sema7a/Icam1/Gcnt2/Havcr2/Spry2/Cd44/Myc/Ccn1/Epha4/Epha7/Dusp4/Sema6a/Epha2/Fgf2/Spry4/Spry3/Ramp3/Ackr3/Ece1/Il1a/F2r/Ptpn1/Mfhas1/Dusp1/Ptprr/Rapgef2/Lmo3/Ccl11/Il1b/Edn1/Spry1/Spred1/C5ar1/Fgfr4/Pdgfc/Rasgrp1/Tirap/Lif/Sox9/Slc30a10/Fermt2/Fgf15	50
BP	GO:1990868	response to chemokine	26/997	96/28928	0.270833	7.85824	12.7165	1.40275e-16	3.49541e-14	2.05514e-14	Ccl2/Cxcl5/Cxcl2/Ccl3/Ccr1/Cxcl1/Ccr8/Hif1a/Ackr1/Cx3cr1/Gpr35/Ccl7/Ackr3/Ccrl2/Dusp1/Xcr1/Ccl11/Dock8/Edn1/Cxcr2/Ccr5/Pf4/Cxcl3/Cxcl10/Zc3h12a/Lox	26
BP	GO:1990869	cellular response to chemokine	26/997	96/28928	0.270833	7.85824	12.7165	1.40275e-16	3.49541e-14	2.05514e-14	Ccl2/Cxcl5/Cxcl2/Ccl3/Ccr1/Cxcl1/Ccr8/Hif1a/Ackr1/Cx3cr1/Gpr35/Ccl7/Ackr3/Ccrl2/Dusp1/Xcr1/Ccl11/Dock8/Edn1/Cxcr2/Ccr5/Pf4/Cxcl3/Cxcl10/Zc3h12a/Lox	26
BP	GO:0009615	response to virus	53/997	412/28928	0.128641	3.73252	10.5542	1.6856e-16	4.01759e-14	2.36215e-14	Hspb1/Il6/Ifi207/Lcn2/Trim30d/Polr3g/Irak3/Nlrp1b/Ripk3/Nlrp9b/Hif1a/Trim8/Ddit4/Mst1r/Tlr13/Ifitm1/Tlr3/Ifit1/Trim12c/Plscr1/Cd86/Il1b/Skp2/Il15/Gbp2b/Acod1/Sting1/Yju2b/Pmaip1/Ifitm6/Rtp4/Ifi213/Tlr8/Dtx3l/Trim34b/Cxcl10/Stat2/Mavs/Trim6/Gbp2/Gsdme/Ifit1bl2/Ifit3/Trim65/Ifit1bl1/Zc3h12a/Mmp12/Sin3a/Ifit3b/Il17ra/Bcl3/Traf6/Oasl2	53
BP	GO:0002218	activation of innate immune response	46/997	324/28928	0.141975	4.11942	10.6681	3.98237e-16	9.09639e-14	5.34825e-14	S100a8/Nfkbia/Ifi207/S100a9/Havcr2/Cd14/Fosl1/Trim30d/Irak3/Hspa1b/Nlrp1b/S100a14/Ninj1/Tlr13/Rnf170/Tlr3/Hexim1/Atat1/Trim12c/Irf4/Mfhas1/Cd86/Sqstm1/Ogt/Tril/Rab7b/Znrf1/Gbp2b/Tnfaip3/Acod1/Sting1/Tnip2/Slc15a3/Clec4e/Ifi213/Inava/Tlr8/Mavs/Gbp2/Clec7a/Tirap/Ifi211/Sin3a/Prkdc/Traf6/Ifi204	46
BP	GO:0070372	regulation of ERK1 and ERK2 cascade	46/997	333/28928	0.138138	4.00808	10.4309	1.14889e-15	2.51928e-13	1.48122e-13	Nrg1/Errfi1/Il6/Ccl3/Abl2/Ccr1/Akap12/Dab2/Sema7a/Icam1/Gcnt2/Havcr2/Spry2/Cd44/Ccn1/Epha4/Epha7/Dusp4/Sema6a/Epha2/Fgf2/Spry4/Spry3/Ramp3/Ackr3/Ece1/Il1a/F2r/Ptpn1/Mfhas1/Dusp1/Ptprr/Rapgef2/Lmo3/Il1b/Spry1/Spred1/C5ar1/Fgfr4/Pdgfc/Rasgrp1/Tirap/Lif/Slc30a10/Fermt2/Fgf15	46
BP	GO:0060485	mesenchyme development	45/997	328/28928	0.137195	3.98072	10.2573	3.04613e-15	6.42265e-13	3.77621e-13	Thbs1/Rdh10/Il6/Dab2/Sema7a/Gcnt2/Spry2/Plaur/Myc/Epha4/Fgfr1/Adam8/Hif1a/Sema6a/Timp3/Foxf1/Sema6b/Tbx3/Axin2/Rgcc/Tgfbr3/Eng/Usf3/Pdpn/Gdnf/Kbtbd8/Sema4a/Il1b/Tasor/Aplf/Sema4c/Edn1/Gja1/Spry1/Spred1/Sema6d/Tgfbr2/Yap1/Ednrb/Sox9/Osr1/Gata4/Cplane2/Fermt2/Fgf15	45
BP	GO:0071621	granulocyte chemotaxis	29/997	138/28928	0.210145	6.09736	11.3402	3.87085e-15	7.85925e-13	4.62087e-13	Thbs1/Tnfaip6/S100a8/Ccl2/Pde4b/Cxcl5/Cxcl2/Ccl3/Cxcl1/S100a9/Csf1/S100a14/Anxa1/Csf3r/Ccl7/Fcgr3/Trem1/Ccl11/Il1b/Il34/Edn1/Cxcr2/C5ar1/Pf4/Cxcl3/Cxcl10/Tirap/Fcer1g/Il17ra	29
BP	GO:0097530	granulocyte migration	32/997	170/28928	0.188235	5.46166	11.0229	4.10067e-15	8.02852e-13	4.72039e-13	Thbs1/Tnfaip6/S100a8/Ccl2/Pde4b/Cxcl5/Cxcl2/Ccl3/Cxcl1/S100a9/Csf1/Adam8/Il1r1/S100a14/Anxa1/Csf3r/Ccl7/Il1a/Fcgr3/Trem1/Ccl11/Il1b/Il34/Edn1/Cxcr2/C5ar1/Pf4/Cxcl3/Cxcl10/Tirap/Fcer1g/Il17ra	32
BP	GO:0032635	interleukin-6 production	33/997	182/28928	0.181319	5.26097	10.8946	4.78369e-15	9.04283e-13	5.31676e-13	Lilrb4b/Lilrb4a/Il6/Havcr2/Ereg/Ccn1/Il10/Irak3/Il1rl2/Tlr3/Il18rap/Rabgef1/Il1a/F2r/Arid5a/Il1b/Capn2/Rab7b/Cebpb/Nos2/Ptafr/Tnfaip3/Ccr5/Inava/Tlr8/Mavs/Clec7a/Tirap/Fcer1g/Zc3h12a/Il17ra/Traf6/Bank1	33
BP	GO:0007159	leukocyte cell-cell adhesion	52/997	434/28928	0.119816	3.47646	9.82098	6.31868e-15	1.11899e-12	6.57912e-13	Thbs1/S100a8/Lilrb4b/Selp/Itga5/Lilrb4a/Ccl2/Hspb1/Nr4a3/Ctla4/Il4ra/Il6/Abl2/Ada/S100a9/Icam1/Havcr2/Cd44/Sele/Adam8/Il1rl2/Ephb4/Nrarp/Slc7a1/Runx1/Sdc4/Cx3cr1/Anxa1/Itpkb/Cd80/Il1a/Il20rb/Cd86/Il1b/Icos/Shb/Lrrc32/Cd160/Cebpb/Dock8/Il15/Ptafr/Cblb/Pf4/Tgfbr2/Gcnt1/Ppara/Nt5e/Icosl/Rasgrp1/Zc3h12a/Traf6	52
BP	GO:0045859	regulation of protein kinase activity	56/997	494/28928	0.11336	3.28915	9.69562	6.32773e-15	1.11899e-12	6.57912e-13	Thbs1/Lilrb4b/Lilrb4a/Hspb1/Nrg1/Errfi1/Trib1/Gadd45g/Spry2/Ereg/Ccn1/Epha4/Irak3/Csf1/Fgfr1/Ripk3/Fgf2/Rap2b/Gadd45b/Mst1r/Ip6k2/Ntf3/Spry4/Rgcc/Rb1/Map3k13/Ptpn1/Flt1/Gprc5a/Chordc1/Dusp1/Rapgef2/Map2k3/Il1b/Il34/Shb/Prlr/Agrn/Edn1/Fgd4/Tnfaip3/Spry1/Spred1/C5ar1/Sfn/Nr2f2/Slc11a1/Gadd45a/Pim1/Pdgfc/Rasgrp1/Tirap/Lrp8/Adrb2/Fermt2/Traf6	56
BP	GO:0032675	regulation of interleukin-6 production	32/997	173/28928	0.184971	5.36694	10.8843	6.88946e-15	1.18025e-12	6.93932e-13	Lilrb4b/Lilrb4a/Il6/Havcr2/Ereg/Ccn1/Il10/Irak3/Il1rl2/Tlr3/Rabgef1/Il1a/F2r/Arid5a/Il1b/Capn2/Rab7b/Cebpb/Nos2/Ptafr/Tnfaip3/Ccr5/Inava/Tlr8/Mavs/Clec7a/Tirap/Fcer1g/Zc3h12a/Il17ra/Traf6/Bank1	32
BP	GO:0050867	positive regulation of cell activation	50/997	407/28928	0.12285	3.5645	9.84405	7.83026e-15	1.30077e-12	7.64793e-13	Thbs1/Lilrb4b/Selp/Lilrb4a/Ccl2/Nr4a3/Il4ra/Il6/Abl2/Ada/Havcr2/Il10/Fgfr1/Adam8/Il1rl2/Ephb4/Slc7a1/Runx1/Anxa1/Itpkb/Axl/Cd80/Pdpn/Il1a/Myb/Tacr1/Cd86/Il1b/Icos/Clec4d/Shb/Cd160/Dock8/Il15/Prlr/Jund/Tnip2/Plek/Mmp8/Tgfbr2/Icosl/Irs2/Rasgrp1/Clec7a/Tirap/Havcr1/Tac1/Il1rl1/Prkdc/Traf6	50
BP	GO:0042060	wound healing	49/997	394/28928	0.124365	3.60847	9.84938	9.0282e-15	1.45566e-12	8.55862e-13	Thbs1/Selp/Itga5/Tnfrsf12a/Hmox1/Lilrb4a/Ccl2/Nrg1/Il6/Plat/Gpr4/Procr/S100a9/Cd44/Plaur/Ccn1/Hif1a/Prrg4/Thbd/Ppl/Fgf2/Sdc4/Rap2b/F3/Anxa1/Axl/Eng/Pdpn/Il1a/F2r/Entpd1/Elk3/Timp1/Dst/Plek/Pf4/Yap1/Prrg1/Serpine1/Ppara/Plau/Slc11a1/Slc7a11/Clec7a/Fcer1g/Gata4/Mmp12/Mertk/Fermt2	49
BP	GO:0032102	negative regulation of response to external stimulus	51/997	426/28928	0.119718	3.47363	9.71758	1.19399e-14	1.87013e-12	1.09955e-12	Thbs1/Tnfaip6/Plat/Socs3/Ccr1/Ada/Trib1/Ifi207/Ier3/Tnfrsf1b/Havcr2/Cd44/Plaur/Epha4/Il10/Irak3/Ctla2a/Thbd/Ccn3/Gpr31b/Fgf2/Foxf1/Cx3cr1/Cdh5/Rb1/Fndc4/Rabgef1/Bcr/Il20rb/Mfhas1/Dusp1/Cd200l1/Tnfaip3/Acod1/Sfn/Pf4/Ifi213/Serpine1/Ppara/Parp14/Plau/Nt5e/Fcgr2b/Stat2/Mavs/Pim1/Ptgr1/Klrb1b/Trim65/Mmp12/St6gal1	51
BP	GO:0002697	regulation of immune effector process	55/997	487/28928	0.112936	3.27685	9.57377	1.30042e-14	1.98026e-12	1.1643e-12	Lilrb4b/Hmox1/Lilrb4a/Ccl2/Nr4a3/Il4ra/Cxcl5/Il6/Sema7a/Cxcl1/S100a9/Tnfrsf1b/Havcr2/D6Wsu163e/Il10/Irak3/Ripk3/Pvr/Ppl/Il1r1/Foxf1/Cx3cr1/Anxa1/Tlr3/Axl/Il18rap/Gab2/Cd80/Rabgef1/Bcr/Arid5a/Il20rb/Fcgr3/Cd86/Pld2/Il1b/Tril/Aplf/Shb/Cd160/Ptafr/Tnfaip3/Pf4/Inava/Fcgr2b/Mavs/Trim6/Rasgrp1/Klrb1b/Clec7a/Tirap/Fcer1g/Zc3h12a/Prkdc/Traf6	55
BP	GO:0001666	response to hypoxia	45/997	343/28928	0.131195	3.80664	9.87917	1.60778e-14	2.38212e-12	1.40058e-12	Hmox1/Ccl2/Plat/Stc1/Ada/Egr1/Myc/Epha4/Adam8/Hif1a/Pgf/Ddit4/Slc2a1/Cysltr1/Plk3/Hilpda/Ptgs2/Rgcc/Adm/Eng/Ece1/Il1a/Nr4a2/Prmt2/Ptpn1/Flt1/Ptprd/Pld2/Lmna/Capn2/Ogt/Ndrg1/Cryab/Nos2/Edn1/Alas2/Cpt1a/Itpr2/Ppara/Plau/Angptl4/Stc2/Adrb2/Lif/Cbfa2t3	45
BP	GO:0048762	mesenchymal cell differentiation	39/997	263/28928	0.148289	4.30261	10.1652	1.66514e-14	2.40218e-12	1.41237e-12	Rdh10/Il6/Dab2/Sema7a/Gcnt2/Spry2/Plaur/Epha4/Fgfr1/Adam8/Hif1a/Sema6a/Timp3/Sema6b/Tbx3/Axin2/Rgcc/Tgfbr3/Eng/Usf3/Pdpn/Gdnf/Kbtbd8/Sema4a/Il1b/Tasor/Aplf/Sema4c/Edn1/Gja1/Spry1/Spred1/Sema6d/Tgfbr2/Ednrb/Sox9/Osr1/Fermt2/Fgf15	39
BP	GO:1903555	regulation of tumor necrosis factor superfamily cytokine production	34/997	202/28928	0.168317	4.88372	10.4651	1.83211e-14	2.57529e-12	1.51415e-12	Thbs1/Lilrb4b/Lilrb4a/Ccl2/Hspb1/Errfi1/Il6/Ccl3/Akap12/Havcr2/Cd14/Ccn1/Il10/Irak3/Adam8/Cx3cr1/Tlr3/Axl/Il1a/Arid5a/Fcgr3/Ptafr/Tnfaip3/Ccr5/Mmp8/Tspo/Fcgr2b/Mavs/Rasgrp1/Clec7a/Tirap/Fcer1g/Zc3h12a/Bcl3	34
BP	GO:0002687	positive regulation of leukocyte migration	32/997	180/28928	0.177778	5.15823	10.573	2.21041e-14	3.02936e-12	1.78112e-12	Thbs1/Selp/Ccl2/Ccl3/Abl2/Ccr1/Icam1/Sele/Csf1/Adam8/Pgf/Il1r1/S100a14/Cx3cr1/Bdkrb1/Ccl7/Il1a/Tacr1/Trem1/Il1b/Il34/Lyve1/Plvap/Dock8/Ptafr/Edn1/Cxcr2/C5ar1/Serpine1/Cxcl10/Tirap/Pla2g7	32
BP	GO:0070661	leukocyte proliferation	47/997	378/28928	0.124339	3.60769	9.64173	3.22266e-14	4.30893e-12	2.53345e-12	Lilrb4b/Lilrb4a/Ctla4/Il6/Ada/Tnfrsf1b/Havcr2/Cd44/Myc/Il10/Csf1/Ripk3/Junb/Slc7a1/Sdc4/Anxa1/Ctps1/Csf2rb2/Cd80/Il1a/Il20rb/Csf2rb/Tacr1/Cd86/Il1b/Il34/Shb/Lrrc32/Cebpb/Dock8/Il15/Prlr/Gja1/Cblb/Tgfbr2/Tnfrsf9/Slc11a1/Icosl/Fcgr2b/Irs2/Rasgrp1/Tirap/Cd180/Gal/Tac1/St6gal1/Traf6	47
BP	GO:0071347	cellular response to interleukin-1	22/997	82/28928	0.268293	7.78452	11.6236	3.77375e-14	4.85365e-12	2.85372e-12	Ccl2/Il6/Cxcl2/Akap12/Nfkbia/Il1r2/Egr1/Irak3/Il1rl2/Il1rn/Hif1a/Inhbb/Il1r1/Il1b/Cebpb/Edn1/Acod1/Tnip2/Serpine1/Sox9/Zc3h12a/Traf6	22
BP	GO:2000106	regulation of leukocyte apoptotic process	27/997	129/28928	0.209302	6.07292	10.9099	3.80713e-14	4.85365e-12	2.85372e-12	Nr4a3/Ada/Bcl2l11/Cd44/Hcar2/Myc/Il10/Ripk3/Adam8/Hif1a/Bcl11b/Anxa1/Itpkb/Axl/Rapgef2/Dock8/Rorc/Cxcr2/Ccr5/Bcl2a1a/Fcgr2b/Irs2/Slc7a11/Fcer1g/St6gal1/Mertk/Bcl3	27
BP	GO:0071706	tumor necrosis factor superfamily cytokine production	34/997	208/28928	0.163462	4.74284	10.2352	4.45141e-14	5.54606e-12	3.26082e-12	Thbs1/Lilrb4b/Lilrb4a/Ccl2/Hspb1/Errfi1/Il6/Ccl3/Akap12/Havcr2/Cd14/Ccn1/Il10/Irak3/Adam8/Cx3cr1/Tlr3/Axl/Il1a/Arid5a/Fcgr3/Ptafr/Tnfaip3/Ccr5/Mmp8/Tspo/Fcgr2b/Mavs/Rasgrp1/Clec7a/Tirap/Fcer1g/Zc3h12a/Bcl3	34
BP	GO:0002366	leukocyte activation involved in immune response	44/997	339/28928	0.129794	3.76596	9.67839	4.6446e-14	5.65815e-12	3.32673e-12	Hmox1/Lilrb4a/Nr4a3/Il4ra/Il6/Ccl3/Sbno2/Ada/Icam1/Gadd45g/Havcr2/D6Wsu163e/Il10/Lig4/Stx11/Foxf1/Cx3cr1/Anxa1/Gab2/Rabgef1/Bcr/Myb/Irf4/Sema4a/Pld2/Clec4d/Aplf/Shb/Cd160/Rorc/Ptafr/Tnfaip3/Sema6d/Pf4/Clec4e/Anxa3/Slc11a1/Icosl/Rasgrp1/Clec7a/Cd180/Fcer1g/Zc3h12a/Bcl3	44
BP	GO:0032680	regulation of tumor necrosis factor production	33/997	199/28928	0.165829	4.81154	10.1935	6.89088e-14	8.08144e-12	4.75151e-12	Thbs1/Lilrb4b/Lilrb4a/Ccl2/Hspb1/Errfi1/Il6/Ccl3/Akap12/Havcr2/Cd14/Ccn1/Il10/Irak3/Cx3cr1/Tlr3/Axl/Il1a/Arid5a/Fcgr3/Ptafr/Tnfaip3/Ccr5/Mmp8/Tspo/Fcgr2b/Mavs/Rasgrp1/Clec7a/Tirap/Fcer1g/Zc3h12a/Bcl3	33
BP	GO:0002263	cell activation involved in immune response	44/997	343/28928	0.12828	3.72205	9.58141	7.06933e-14	8.08144e-12	4.75151e-12	Hmox1/Lilrb4a/Nr4a3/Il4ra/Il6/Ccl3/Sbno2/Ada/Icam1/Gadd45g/Havcr2/D6Wsu163e/Il10/Lig4/Stx11/Foxf1/Cx3cr1/Anxa1/Gab2/Rabgef1/Bcr/Myb/Irf4/Sema4a/Pld2/Clec4d/Aplf/Shb/Cd160/Rorc/Ptafr/Tnfaip3/Sema6d/Pf4/Clec4e/Anxa3/Slc11a1/Icosl/Rasgrp1/Clec7a/Cd180/Fcer1g/Zc3h12a/Bcl3	44
BP	GO:0051607	defense response to virus	43/997	329/28928	0.130699	3.79224	9.62346	7.07605e-14	8.08144e-12	4.75151e-12	Il6/Ifi207/Trim30d/Polr3g/Nlrp1b/Ripk3/Nlrp9b/Trim8/Ddit4/Ifitm1/Tlr3/Ifit1/Trim12c/Plscr1/Cd86/Il1b/Skp2/Il15/Gbp2b/Acod1/Sting1/Pmaip1/Ifitm6/Rtp4/Ifi213/Tlr8/Dtx3l/Trim34b/Cxcl10/Stat2/Mavs/Trim6/Gbp2/Ifit1bl2/Ifit3/Trim65/Ifit1bl1/Zc3h12a/Mmp12/Sin3a/Ifit3b/Traf6/Oasl2	43
BP	GO:0070555	response to interleukin-1	24/997	103/28928	0.23301	6.76079	11.0655	8.04313e-14	8.99846e-12	5.29067e-12	Ccl2/Il6/Cxcl2/Akap12/Nfkbia/Il1r2/Egr1/Sele/Irak3/Il1rl2/Il1rn/Hif1a/Inhbb/Il1r1/Gclc/Il1b/Cebpb/Edn1/Acod1/Tnip2/Serpine1/Sox9/Zc3h12a/Traf6	24
BP	GO:0070098	chemokine-mediated signaling pathway	22/997	85/28928	0.258824	7.50978	11.3556	8.50851e-14	9.32873e-12	5.48485e-12	Ccl2/Cxcl5/Cxcl2/Ccl3/Ccr1/Cxcl1/Ccr8/Hif1a/Ackr1/Cx3cr1/Gpr35/Ccl7/Ackr3/Ccrl2/Xcr1/Ccl11/Edn1/Cxcr2/Ccr5/Pf4/Cxcl3/Cxcl10	22
BP	GO:0040013	negative regulation of locomotion	45/997	360/28928	0.125	3.62688	9.47562	9.40395e-14	1.01083e-11	5.94322e-12	Thbs1/Tnfaip6/Nrg1/Stc1/Ada/Trib1/Epha4/Adamts9/Clic4/Il1rn/Ccn3/Fgf2/Rap2b/Ifitm1/Cx3cr1/Robo4/Rgcc/Rabgef1/Tgfbr3/Bcr/Eng/Ptpn1/Dusp1/Ptprr/Stard13/Ogt/Adgrg1/Timp1/Gja1/Spred1/Sema6d/Acvr1c/Has1/Nr2f2/Serpine1/Gadd45a/Meox2/Ptgr1/Arrdc3/Mctp1/Sp100/Igfbp3/Abhd2/Sin3a/St6gal1	45
BP	GO:0030217	T cell differentiation	44/997	348/28928	0.126437	3.66857	9.46222	1.1837e-13	1.2479e-11	7.33705e-12	Lilrb4b/Lilrb4a/Hspb1/Ctla4/Il4ra/Il6/Abl2/Ada/Gadd45g/Mpzl2/Cd44/Egr1/Lig4/Ripk3/Adam8/Il1rl2/Ctla2a/Nrarp/Bcl11b/Runx1/Anxa1/Itpkb/Il1a/Myb/Irf4/Sema4a/Il1b/Clec4d/Shb/Rorc/Il15/Pf4/Tgfbr2/Ctsl/Clec4e/Tnfrsf9/Bcl2a1d/Rasgrp1/Bcl11a/Fcer1g/Zc3h12a/Prkdc/Bcl3/Hmga1	44
BP	GO:0032640	tumor necrosis factor production	33/997	205/28928	0.160976	4.67071	9.9648	1.6447e-13	1.70117e-11	1.00021e-11	Thbs1/Lilrb4b/Lilrb4a/Ccl2/Hspb1/Errfi1/Il6/Ccl3/Akap12/Havcr2/Cd14/Ccn1/Il10/Irak3/Cx3cr1/Tlr3/Axl/Il1a/Arid5a/Fcgr3/Ptafr/Tnfaip3/Ccr5/Mmp8/Tspo/Fcgr2b/Mavs/Rasgrp1/Clec7a/Tirap/Fcer1g/Zc3h12a/Bcl3	33
BP	GO:0003018	vascular process in circulatory system	37/997	256/28928	0.144531	4.19358	9.69672	1.76635e-13	1.79317e-11	1.0543e-11	Akap12/Gpr4/Icam1/Dusp5/Gucy1a1/Hif1a/Ptgs1/Abcc1/Slc2a1/Cysltr1/Cdh5/Ptgs2/Calca/Tgfbr3/Adm/Bcr/Ece1/C2cd4b/F2r/Gclc/Tacr1/Avpr1a/Plvap/Edn1/Abcg2/Tjp2/Bdkrb2/Gja1/Cxcr2/Ednrb/Mfsd2a/Adrb2/Nts/Slc27a1/Ptp4a3/Flvcr2/Fermt2	37
BP	GO:0002221	pattern recognition receptor signaling pathway	39/997	283/28928	0.137809	3.99854	9.57711	1.8725e-13	1.86637e-11	1.09734e-11	S100a8/Nfkbia/Ifi207/S100a9/Havcr2/Cd14/Fosl1/Irak3/Hspa1b/Nlrp1b/S100a14/Ninj1/Tlr13/Rnf170/Tlr3/Atat1/Irf4/Mfhas1/Cd86/Sqstm1/Ogt/Tril/Rab7b/Znrf1/Tnfaip3/Acod1/Sting1/Tnip2/Slc15a3/Clec4e/Ifi213/Inava/Tlr8/Mavs/Gbp2/Clec7a/Tirap/Prkdc/Traf6	39
BP	GO:1903706	regulation of hemopoiesis	51/997	458/28928	0.111354	3.23093	9.09246	2.10189e-13	2.0576e-11	1.20977e-11	Tnfaip6/Lilrb4b/Lilrb4a/Hspb1/Ctla4/Il4ra/Il6/Ccl3/Ccr1/Ada/Nfkbia/Trib1/Csf3/Klf10/Cd44/Myc/Il10/Hspa1b/Csf1/Adam8/Il1rl2/Ctla2a/Hif1a/Nrarp/Tnfrsf11b/Runx1/Ninj1/Anxa1/Csf3r/Itpkb/Axl/Gpr171/Rb1/Myb/Il34/Rab7b/Shb/Cebpb/Rorc/Il15/Tjp2/Pf4/Tgfbr2/Meis2/Rasgrp1/Meis1/Lif/Zc3h12a/Lox/Prkdc/Traf6	51
BP	GO:0030336	negative regulation of cell migration	42/997	326/28928	0.128834	3.73813	9.39337	2.26363e-13	2.17705e-11	1.28e-11	Thbs1/Tnfaip6/Nrg1/Stc1/Ada/Trib1/Epha4/Adamts9/Clic4/Il1rn/Ccn3/Fgf2/Rap2b/Ifitm1/Cx3cr1/Robo4/Rgcc/Rabgef1/Tgfbr3/Bcr/Eng/Ptpn1/Dusp1/Ptprr/Stard13/Ogt/Adgrg1/Timp1/Gja1/Spred1/Sema6d/Acvr1c/Has1/Nr2f2/Serpine1/Gadd45a/Meox2/Mctp1/Sp100/Igfbp3/Abhd2/Sin3a	42
BP	GO:0032943	mononuclear cell proliferation	43/997	343/28928	0.125364	3.63745	9.28366	3.02706e-13	2.86109e-11	1.68219e-11	Lilrb4b/Lilrb4a/Ctla4/Il6/Ada/Tnfrsf1b/Havcr2/Cd44/Myc/Il10/Csf1/Ripk3/Slc7a1/Sdc4/Anxa1/Ctps1/Cd80/Il1a/Il20rb/Tacr1/Cd86/Il1b/Shb/Lrrc32/Cebpb/Dock8/Il15/Prlr/Gja1/Cblb/Tgfbr2/Tnfrsf9/Slc11a1/Icosl/Fcgr2b/Irs2/Rasgrp1/Tirap/Cd180/Gal/Tac1/St6gal1/Traf6	43
BP	GO:0030522	intracellular receptor signaling pathway	46/997	388/28928	0.118557	3.43993	9.14159	3.44566e-13	3.20155e-11	1.88236e-11	Nr4a3/Errfi1/Nfkbia/Dab2/Ifi207/Havcr2/Hspa1b/Nlrp1b/Nr4a1/Fam120b/Tlr13/Rnf170/Aldh1a3/Tlr3/Nr5a2/Per1/Atat1/Nr4a2/Prmt2/Flt1/Cd86/Lmo3/Skp2/Ogt/Rab7b/Klf9/Rorc/Jund/Tnfaip3/Sting1/Tnip2/Slc15a3/Aloxe3/Nr2f2/Ifi213/Inava/Ppara/Tlr8/Mavs/Pim1/Gbp2/Cry2/Tirap/Prkdc/Hmga1/Traf6	46
BP	GO:0043542	endothelial cell migration	35/997	237/28928	0.147679	4.28492	9.59362	4.18235e-13	3.77339e-11	2.21857e-11	Thbs1/Hmox1/Hspb1/Stc1/S100a9/Lcn2/Adamts9/Fgfr1/Adam8/Nr4a1/Ephb4/Hif1a/Ccn3/Glul/Epha2/Fgf2/Rhoj/Anxa1/Cdh5/Robo4/Ptgs2/Rgcc/Plk2/Tgfbr3/Sema4a/Stard13/Map2k3/Spred1/Nr2f2/Anxa3/Gadd45a/Meox2/Sp100/Zc3h12a/Ptp4a3	35
BP	GO:0071887	leukocyte apoptotic process	29/997	164/28928	0.176829	5.13071	10.0225	4.19877e-13	3.77339e-11	2.21857e-11	Nr4a3/Il6/Ada/Plekho2/Bcl2l11/Cd44/Hcar2/Myc/Il10/Ripk3/Adam8/Hif1a/Bcl11b/Anxa1/Itpkb/Axl/Rapgef2/Dock8/Rorc/Cxcr2/Ccr5/Bcl2a1a/Fcgr2b/Irs2/Slc7a11/Fcer1g/St6gal1/Mertk/Bcl3	29
BP	GO:0031348	negative regulation of defense response	39/997	292/28928	0.133562	3.8753	9.32984	5.15828e-13	4.56091e-11	2.6816e-11	Tnfaip6/Socs3/Ccr1/Ada/Ifi207/Ier3/Tnfrsf1b/Havcr2/Cd44/Il10/Irak3/Ctla2a/Ccn3/Gpr31b/Foxf1/Cx3cr1/Cdh5/Rb1/Fndc4/Rabgef1/Bcr/Il20rb/Mfhas1/Cd200l1/Tnfaip3/Acod1/Sfn/Pf4/Ifi213/Ppara/Parp14/Nt5e/Fcgr2b/Stat2/Mavs/Pim1/Klrb1b/Trim65/Mmp12	39
BP	GO:1903037	regulation of leukocyte cell-cell adhesion	46/997	393/28928	0.117048	3.39616	9.03607	5.46492e-13	4.75535e-11	2.79592e-11	Lilrb4b/Selp/Lilrb4a/Ccl2/Hspb1/Nr4a3/Ctla4/Il4ra/Il6/Abl2/Ada/Icam1/Havcr2/Cd44/Sele/Adam8/Il1rl2/Ephb4/Nrarp/Slc7a1/Runx1/Sdc4/Anxa1/Itpkb/Cd80/Il1a/Il20rb/Cd86/Il1b/Icos/Shb/Lrrc32/Cd160/Cebpb/Dock8/Il15/Ptafr/Cblb/Pf4/Tgfbr2/Gcnt1/Ppara/Icosl/Rasgrp1/Zc3h12a/Traf6	46
BP	GO:0036293	response to decreased oxygen levels	45/997	379/28928	0.118734	3.44506	9.05252	5.91541e-13	5.06692e-11	2.97911e-11	Hmox1/Ccl2/Plat/Stc1/Ada/Egr1/Myc/Epha4/Adam8/Hif1a/Pgf/Ddit4/Slc2a1/Cysltr1/Plk3/Hilpda/Ptgs2/Rgcc/Adm/Eng/Ece1/Il1a/Nr4a2/Prmt2/Ptpn1/Flt1/Ptprd/Pld2/Lmna/Capn2/Ogt/Ndrg1/Cryab/Nos2/Edn1/Alas2/Cpt1a/Itpr2/Ppara/Plau/Angptl4/Stc2/Adrb2/Lif/Cbfa2t3	45
BP	GO:0002758	innate immune response-activating signaling pathway	39/997	294/28928	0.132653	3.84893	9.27622	6.42308e-13	5.41713e-11	3.18502e-11	S100a8/Nfkbia/Ifi207/S100a9/Havcr2/Cd14/Fosl1/Irak3/Hspa1b/Nlrp1b/S100a14/Ninj1/Tlr13/Rnf170/Tlr3/Atat1/Irf4/Mfhas1/Cd86/Sqstm1/Ogt/Tril/Rab7b/Znrf1/Tnfaip3/Acod1/Sting1/Tnip2/Slc15a3/Clec4e/Ifi213/Inava/Tlr8/Mavs/Gbp2/Clec7a/Tirap/Prkdc/Traf6	39
BP	GO:0001776	leukocyte homeostasis	27/997	145/28928	0.186207	5.4028	10.0416	7.47434e-13	6.20823e-11	3.65015e-11	Lilrb4a/Ccl2/Pde4b/Cxcl5/Il6/Ada/Bcl2l11/Cd44/Hcar2/Csf1/Ripk3/Hif1a/Anxa1/Itpkb/Axl/F2r/Il20rb/Bbs4/Tnfaip3/Cxcr2/Pmaip1/Bcl2a1a/Slc40a1/Fcgr2b/Slc7a11/Fcer1g/Mertk	27
BP	GO:0002696	positive regulation of leukocyte activation	45/997	383/28928	0.117493	3.40908	8.96688	8.56706e-13	7.00965e-11	4.12134e-11	Thbs1/Lilrb4b/Lilrb4a/Ccl2/Nr4a3/Il4ra/Il6/Abl2/Ada/Havcr2/Il10/Adam8/Il1rl2/Ephb4/Slc7a1/Runx1/Anxa1/Itpkb/Axl/Cd80/Il1a/Tacr1/Cd86/Il1b/Icos/Clec4d/Shb/Cd160/Dock8/Il15/Prlr/Jund/Tnip2/Mmp8/Tgfbr2/Icosl/Irs2/Rasgrp1/Clec7a/Tirap/Havcr1/Tac1/Il1rl1/Prkdc/Traf6	45
BP	GO:0002367	cytokine production involved in immune response	28/997	158/28928	0.177215	5.14191	9.86313	1.00567e-12	8.10745e-11	4.7668e-11	Lilrb4b/Hmox1/Lilrb4a/Nr4a3/Il6/Sema7a/Tnfrsf1b/Il10/Irak3/Il1r1/Tlr3/Axl/Il18rap/Rabgef1/Arid5a/Trem1/Il1b/Tril/Cd160/Inava/Slc11a1/Mavs/Trim6/Rasgrp1/Clec7a/Tirap/Fcer1g/Traf6	28
BP	GO:0048872	homeostasis of number of cells	48/997	431/28928	0.111369	3.23137	8.81795	1.075e-12	8.54083e-11	5.02161e-11	Hmox1/Lilrb4a/Ccl2/Pde4b/Cxcl5/Il6/Ada/Bcl2l11/Cd44/Hcar2/Hspa1b/Csf1/Ripk3/Hif1a/Ccn3/Cx3cr1/Anxa1/Itpkb/Axl/Hba-a2/Hba-a1/Rb1/Tgfbr3/Bcr/Myb/F2r/Il20rb/Adgrf5/Sox6/Mfhas1/Hoxb6/Adgrg1/Bbs4/Alas2/Tnfaip3/Cxcr2/Pmaip1/Nemp1/Bcl2a1a/Slc40a1/Fcgr2b/Slc7a11/Sox9/Fcer1g/Prkdc/Napepld/Mertk/Hmga1	48
BP	GO:2000146	negative regulation of cell motility	42/997	342/28928	0.122807	3.56325	9.00914	1.14425e-12	8.96114e-11	5.26873e-11	Thbs1/Tnfaip6/Nrg1/Stc1/Ada/Trib1/Epha4/Adamts9/Clic4/Il1rn/Ccn3/Fgf2/Rap2b/Ifitm1/Cx3cr1/Robo4/Rgcc/Rabgef1/Tgfbr3/Bcr/Eng/Ptpn1/Dusp1/Ptprr/Stard13/Ogt/Adgrg1/Timp1/Gja1/Spred1/Sema6d/Acvr1c/Has1/Nr2f2/Serpine1/Gadd45a/Meox2/Mctp1/Sp100/Igfbp3/Abhd2/Sin3a	42
BP	GO:0048545	response to steroid hormone	43/997	357/28928	0.120448	3.49481	8.96117	1.19328e-12	9.18374e-11	5.39961e-11	Fosb/Areg/Ccl2/Errfi1/Il6/Cxcl2/Stc1/Dab2/Paqr8/Fosl1/Il10/Fam107a/Il1rn/Junb/Ddit4/Axin2/Anxa1/Ptgs2/Adm/Per1/Gdnf/Prmt2/Tacr1/Avpr1a/Cpn1/Lmo3/Pappa/Skp2/Klf9/Ptafr/Edn1/Jund/Acod1/Pf4/Ctsl/Por/Yap1/Ppara/Tspo/Anxa3/Cry2/Abhd2/Lox	43
BP	GO:0070663	regulation of leukocyte proliferation	38/997	286/28928	0.132867	3.85515	9.16781	1.20738e-12	9.18374e-11	5.39961e-11	Lilrb4b/Lilrb4a/Ctla4/Il6/Ada/Tnfrsf1b/Havcr2/Cd44/Il10/Csf1/Ripk3/Slc7a1/Sdc4/Anxa1/Csf2rb2/Cd80/Il1a/Il20rb/Csf2rb/Tacr1/Cd86/Il1b/Il34/Lrrc32/Cebpb/Il15/Prlr/Cblb/Tgfbr2/Tnfrsf9/Icosl/Fcgr2b/Irs2/Tirap/Gal/Tac1/St6gal1/Traf6	38
BP	GO:0051090	regulation of DNA-binding transcription factor activity	44/997	372/28928	0.11828	3.43189	8.91912	1.22293e-12	9.18374e-11	5.39961e-11	Sphk1/Sik1/Il6/Nfkbia/Trib1/Ptch1/Havcr2/Trim30d/Fzd2/Il10/Irak3/Hspa1b/Ripk3/Id3/Trim8/Tlr3/Il18rap/Rgcc/Map3k13/Tgfbr3/Trim12c/Prmt2/Sox6/Il1b/Rab7b/Edn1/Tnfaip3/Acod1/Sting1/Bhlhe40/Anxa3/Fcgr2b/Mavs/Cytl1/Pim1/Clec7a/Tirap/Sp100/Nts/Zc3h12a/Id1/Bcl3/Ifrd1/Traf6	44
BP	GO:0045766	positive regulation of angiogenesis	30/997	184/28928	0.163043	4.73071	9.59143	1.47957e-12	1.09608e-10	6.44443e-11	Thbs1/Itga5/Sphk1/Hmox1/Hspb1/Il10/Hif1a/Pgf/Fgf2/Runx1/Ninj1/F3/Cysltr1/Cx3cr1/Cdh5/Tlr3/Adm/Eng/Il1a/Flt1/Ccl11/Il1b/Cxcr2/C5ar1/Tgfbr2/Serpine1/Anxa3/Ecm1/Zc3h12a/Gata4	30
BP	GO:1904018	positive regulation of vasculature development	30/997	187/28928	0.160428	4.65482	9.4731	2.27232e-12	1.66091e-10	9.76538e-11	Thbs1/Itga5/Sphk1/Hmox1/Hspb1/Il10/Hif1a/Pgf/Fgf2/Runx1/Ninj1/F3/Cysltr1/Cx3cr1/Cdh5/Tlr3/Adm/Eng/Il1a/Flt1/Ccl11/Il1b/Cxcr2/C5ar1/Tgfbr2/Serpine1/Anxa3/Ecm1/Zc3h12a/Gata4	30
BP	GO:0030098	lymphocyte differentiation	50/997	472/28928	0.105932	3.07363	8.58165	2.38436e-12	1.71988e-10	1.01121e-10	Lilrb4b/Lilrb4a/Hspb1/Ctla4/Il4ra/Il6/Abl2/Ada/Gadd45g/Mpzl2/Cd44/Egr1/Il10/Lig4/Ripk3/Adam8/Il1rl2/Ctla2a/Nrarp/Bcl11b/Runx1/Anxa1/Itpkb/Axl/Lrrc8a/Il1a/Myb/Irf4/Sema4a/Il1b/Clec4d/Shb/Rorc/Il15/Tnfaip3/Pf4/Tgfbr2/Ctsl/Clec4e/Tnfrsf9/Lyl1/Bcl2a1d/Rasgrp1/Bcl11a/Fcer1g/Zc3h12a/Prkdc/Mertk/Bcl3/Hmga1	50
BP	GO:0046651	lymphocyte proliferation	41/997	336/28928	0.122024	3.54053	8.84967	2.62054e-12	1.86569e-10	1.09694e-10	Lilrb4b/Lilrb4a/Ctla4/Il6/Ada/Tnfrsf1b/Havcr2/Cd44/Myc/Il10/Ripk3/Slc7a1/Sdc4/Anxa1/Ctps1/Cd80/Il1a/Il20rb/Tacr1/Cd86/Il1b/Shb/Lrrc32/Cebpb/Dock8/Il15/Prlr/Gja1/Cblb/Tgfbr2/Tnfrsf9/Slc11a1/Icosl/Fcgr2b/Irs2/Rasgrp1/Tirap/Cd180/Gal/Tac1/Traf6	41
BP	GO:0032612	interleukin-1 production	25/997	131/28928	0.19084	5.53722	9.8335	2.97619e-12	2.09173e-10	1.22984e-10	Lilrb4b/Sphk1/Lilrb4a/Hspb1/Errfi1/Il6/Ccl3/Ifi207/Il1r2/Havcr2/Egr1/Ccn1/Nlrp1b/Cx3cr1/Anxa1/F2r/Il1b/Tnfaip3/Ccr5/Ifi213/Inava/Tlr8/S1pr3/Clec7a/Zc3h12a	25
BP	GO:0070482	response to oxygen levels	48/997	444/28928	0.108108	3.13676	8.57241	3.16921e-12	2.19919e-10	1.29302e-10	Hmox1/Ccl2/Plat/Stc1/Ada/Egr1/Myc/Epha4/Adam8/Gucy1a1/Hif1a/Pgf/Ddit4/Slc2a1/Cysltr1/Plk3/Hilpda/Ptgs2/Rgcc/Adm/Eng/Ece1/Il1a/Nr4a2/Prmt2/Ptpn1/Flt1/Ptprd/Pld2/Lmna/Capn2/Ogt/Ndrg1/Cryab/Nos2/Edn1/Alas2/Cpt1a/Itpr2/Ppara/Plau/Angptl4/Stc2/Slc7a5/Gucy1b1/Adrb2/Lif/Cbfa2t3	48
BP	GO:0071674	mononuclear cell migration	33/997	228/28928	0.144737	4.19955	9.1637	3.44325e-12	2.35949e-10	1.38727e-10	Thbs1/Ch25h/Ccl2/Ccl3/Abl2/Ccr1/Icam1/Retnlg/Csf1/Ripk3/Adam8/Ccn3/S100a14/Ninj1/Cx3cr1/Anxa1/Gpr35/Ccl7/Bcr/Asb2/Flt1/Dusp1/Trem1/Il34/Cxcl16/Dock8/C5ar1/Serpine1/S1pr1/Cxcl10/Ednrb/Ecm1/Pla2g7	33
BP	GO:0050729	positive regulation of inflammatory response	27/997	155/28928	0.174194	5.05423	9.56177	3.89098e-12	2.63338e-10	1.5483e-10	S100a8/Il6/Ccl3/Map3k8/Nfkbia/Gpr4/S100a9/Nlrp1b/Adam8/Ninj1/Abcc1/Ptgs2/C2cd4b/Fcgr3/Il1b/Cebpb/Gbp2b/Ccr5/Mmp8/Serpine1/Gbp2/Fcer1g/Tac1/Osm/Il1rl1/Napepld/Il17ra	27
BP	GO:0032609	type II interferon production	26/997	145/28928	0.17931	5.2027	9.58518	4.8963e-12	3.27336e-10	1.92458e-10	Lilrb4b/Lilrb4a/Pde4b/Abl2/Gadd45g/Havcr2/Cd14/Il10/Ripk3/Il1r1/Runx1/Tlr3/Axl/Il18rap/Arid5a/Il20rb/Il1b/Cd160/Tlr8/Slc11a1/Slc7a5/Rasgrp1/Clec7a/Zc3h12a/Il1rl1/Bcl3	26
BP	GO:0010563	negative regulation of phosphorus metabolic process	44/997	388/28928	0.113402	3.29037	8.58123	5.16004e-12	3.36754e-10	1.97996e-10	Lilrb4b/Lilrb4a/Hspb1/Errfi1/Socs3/Trib1/Ier3/Gadd45g/Spry2/Irak3/Gadd45b/Ddit4/Ntf3/Spry4/Bdkrb1/Rb1/Rabgef1/Ptpn1/Gprc5a/Chordc1/Dusp1/Il1b/Ogt/Entpd1/Shb/Ctdsp1/Bdkrb2/Tnfaip3/Spry1/Spred1/Plek/Nr2f2/Ppara/Tspo/Parp14/Gadd45a/Irs2/Igfbp3/Zc3h12a/Slc27a1/Cbfa2t3/Prkdc/Midn/Cda	44
BP	GO:0045936	negative regulation of phosphate metabolic process	44/997	388/28928	0.113402	3.29037	8.58123	5.16004e-12	3.36754e-10	1.97996e-10	Lilrb4b/Lilrb4a/Hspb1/Errfi1/Socs3/Trib1/Ier3/Gadd45g/Spry2/Irak3/Gadd45b/Ddit4/Ntf3/Spry4/Bdkrb1/Rb1/Rabgef1/Ptpn1/Gprc5a/Chordc1/Dusp1/Il1b/Ogt/Entpd1/Shb/Ctdsp1/Bdkrb2/Tnfaip3/Spry1/Spred1/Plek/Nr2f2/Ppara/Tspo/Parp14/Gadd45a/Irs2/Igfbp3/Zc3h12a/Slc27a1/Cbfa2t3/Prkdc/Midn/Cda	44
BP	GO:0002262	myeloid cell homeostasis	33/997	232/28928	0.142241	4.12714	9.03518	5.60056e-12	3.61203e-10	2.1237e-10	Hmox1/Lilrb4a/Ccl2/Pde4b/Il6/Bcl2l11/Cd44/Hcar2/Hspa1b/Csf1/Hif1a/Anxa1/Itpkb/Axl/Hba-a2/Hba-a1/Rb1/Tgfbr3/Myb/Adgrf5/Sox6/Mfhas1/Hoxb6/Bbs4/Alas2/Cxcr2/Nemp1/Fcgr2b/Slc7a11/Fcer1g/Prkdc/Mertk/Hmga1	33
BP	GO:0032652	regulation of interleukin-1 production	24/997	125/28928	0.192	5.57089	9.67593	7.05754e-12	4.49877e-10	2.64507e-10	Lilrb4b/Sphk1/Lilrb4a/Hspb1/Errfi1/Il6/Ccl3/Ifi207/Il1r2/Havcr2/Egr1/Ccn1/Nlrp1b/Cx3cr1/Anxa1/F2r/Tnfaip3/Ccr5/Ifi213/Inava/Tlr8/S1pr3/Clec7a/Zc3h12a	24
BP	GO:0045637	regulation of myeloid cell differentiation	33/997	236/28928	0.139831	4.05719	8.90951	9.00642e-12	5.67508e-10	3.33668e-10	Tnfaip6/Lilrb4b/Lilrb4a/Ccl3/Ccr1/Nfkbia/Trib1/Csf3/Klf10/Myc/Hspa1b/Csf1/Adam8/Hif1a/Tnfrsf11b/Runx1/Ninj1/Csf3r/Itpkb/Gpr171/Rb1/Myb/Il34/Rab7b/Cebpb/Tjp2/Pf4/Meis2/Meis1/Lif/Lox/Prkdc/Traf6	33
BP	GO:0048659	smooth muscle cell proliferation	31/997	210/28928	0.147619	4.28317	9.02158	9.21587e-12	5.74107e-10	3.37548e-10	Thbs1/Adamts1/Hmox1/Nr4a3/Il6/Trib1/Ereg/Egr1/Myc/Il10/Hif1a/Ccn3/Fgf2/Timp3/Ptgs2/Myb/Flt1/Tacr1/Skp2/Il15/Ptafr/Edn1/Ldlrap1/Tnfaip3/Gja1/Tgfbr2/S1pr1/Igfbp3/Prkdc/Vip/Traf6	31
BP	GO:0032944	regulation of mononuclear cell proliferation	35/997	264/28928	0.132576	3.84669	8.7787	9.96211e-12	6.13621e-10	3.6078e-10	Lilrb4b/Lilrb4a/Ctla4/Il6/Ada/Tnfrsf1b/Havcr2/Cd44/Il10/Csf1/Ripk3/Slc7a1/Sdc4/Anxa1/Cd80/Il1a/Il20rb/Tacr1/Cd86/Il1b/Lrrc32/Cebpb/Il15/Prlr/Cblb/Tgfbr2/Tnfrsf9/Icosl/Fcgr2b/Irs2/Tirap/Gal/Tac1/St6gal1/Traf6	35
BP	GO:0035456	response to interferon-beta	19/997	77/28928	0.246753	7.15956	10.2252	1.05172e-11	6.40615e-10	3.76651e-10	Ifi207/Ifitm1/Tlr3/Ifit1/Plscr1/Gm5431/Capn2/Gbp2b/Acod1/Sting1/Ifitm6/Ifi213/Mavs/Trim6/Gbp2/Ifit3/Ifi211/9930111J21Rik1/Ifi204	19
BP	GO:0033002	muscle cell proliferation	37/997	293/28928	0.12628	3.66402	8.65921	1.1067e-11	6.65611e-10	3.91348e-10	Thbs1/Adamts1/Hmox1/Nr4a3/Nrg1/Il6/Trib1/Ereg/Egr1/Myc/Il10/Fgfr1/Hif1a/Ccn3/Fgf2/Timp3/Ptgs2/Tgfbr3/Myb/Flt1/Tacr1/Skp2/Il15/Ptafr/Edn1/Ldlrap1/Tnfaip3/Gja1/Tgfbr2/Yap1/S1pr1/Pim1/Igfbp3/Gata4/Prkdc/Vip/Traf6	37
BP	GO:0050863	regulation of T cell activation	44/997	397/28928	0.110831	3.21577	8.39882	1.11704e-11	6.65611e-10	3.91348e-10	Lilrb4b/Lilrb4a/Ccl2/Hspb1/Ctla4/Il4ra/Il6/Abl2/Ada/Tnfrsf1b/Havcr2/Cd44/Ripk3/Adam8/Il1rl2/Ephb4/Ctla2a/Nrarp/Slc7a1/Runx1/Sdc4/Anxa1/Itpkb/Cd80/Il1a/Il20rb/Cd86/Il1b/Icos/Shb/Lrrc32/Cd160/Cebpb/Dock8/Rorc/Il15/Cblb/Pf4/Tgfbr2/Tnfrsf9/Icosl/Rasgrp1/Zc3h12a/Traf6	44
BP	GO:1990266	neutrophil migration	24/997	128/28928	0.1875	5.44032	9.51216	1.1992e-11	7.06882e-10	4.15613e-10	Tnfaip6/S100a8/Ccl2/Pde4b/Cxcl5/Cxcl2/Ccl3/Cxcl1/S100a9/Adam8/Il1r1/Csf3r/Il1a/Fcgr3/Trem1/Il1b/Edn1/Cxcr2/C5ar1/Pf4/Cxcl3/Cxcl10/Tirap/Fcer1g	24
BP	GO:0044706	multi-multicellular organism process	35/997	266/28928	0.131579	3.81777	8.72266	1.23751e-11	7.21707e-10	4.2433e-10	Fosb/Itga5/Ccl2/Errfi1/Stc1/Havcr2/Fosl1/Sh3pxd2b/Thbd/Junb/Slc2a1/Ptgs2/Adm/Tacr1/Ppp3cc/Avpr1a/Pappa/Capn2/Klf9/Aplf/Ptafr/Edn1/Abcg2/Timp1/Gja1/Acod1/Ctsl/Acvr1c/A1cf/Nr2f2/Acsl4/Tead4/Stc2/Lif/Mmp12	35
BP	GO:0002440	production of molecular mediator of immune response	37/997	295/28928	0.125424	3.63918	8.60799	1.35535e-11	7.82108e-10	4.59843e-10	Lilrb4b/Hmox1/Lilrb4a/Nr4a3/Il4ra/Il6/Sema7a/Tnfrsf1b/Il10/Irak3/Lig4/Ppl/Il1r1/Tlr3/Axl/Il18rap/Rabgef1/Arid5a/Cd86/Trem1/Il1b/Tril/Aplf/Cd160/Tnfaip3/Inava/Slc11a1/Icosl/Fcgr2b/Mavs/Trim6/Rasgrp1/Clec7a/Tirap/Fcer1g/Prkdc/Traf6	37
BP	GO:0048660	regulation of smooth muscle cell proliferation	30/997	201/28928	0.149254	4.3306	8.95224	1.49854e-11	8.49075e-10	4.99216e-10	Thbs1/Adamts1/Hmox1/Nr4a3/Il6/Trib1/Ereg/Egr1/Myc/Il10/Hif1a/Fgf2/Timp3/Ptgs2/Myb/Flt1/Tacr1/Skp2/Il15/Ptafr/Edn1/Ldlrap1/Tnfaip3/Gja1/Tgfbr2/S1pr1/Igfbp3/Prkdc/Vip/Traf6	30
BP	GO:0002700	regulation of production of molecular mediator of immune response	31/997	214/28928	0.14486	4.20311	8.88564	1.51828e-11	8.49075e-10	4.99216e-10	Lilrb4b/Hmox1/Lilrb4a/Nr4a3/Il4ra/Il6/Sema7a/Tnfrsf1b/Il10/Irak3/Ppl/Il1r1/Tlr3/Axl/Rabgef1/Arid5a/Cd86/Il1b/Tril/Aplf/Cd160/Tnfaip3/Inava/Fcgr2b/Mavs/Trim6/Clec7a/Tirap/Fcer1g/Prkdc/Traf6	31
BP	GO:0050678	regulation of epithelial cell proliferation	46/997	432/28928	0.106481	3.08956	8.26726	1.51948e-11	8.49075e-10	4.99216e-10	Thbs1/Hmox1/Ccl2/Nr4a3/Errfi1/Il6/Stxbp4/Dab2/Ptch1/Myc/Il10/Fgfr1/Nr4a1/Nrarp/Bcl11b/Glul/Pgf/Fgf2/F3/Rgcc/Rb1/Tgfbr3/Eng/Ovol1/Flt1/Tacr1/Ccl11/Klf9/Tnfaip3/Gja1/C5ar1/Sfn/Ctsl/Yap1/Nr2f2/Plau/Ednrb/Irs2/Sox9/Osr1/Ecm1/Mmp12/Prkdc/Id1/Vip/Osr2	46
BP	GO:0022409	positive regulation of cell-cell adhesion	40/997	340/28928	0.117647	3.41353	8.4578	1.53335e-11	8.49075e-10	4.99216e-10	Lilrb4b/Selp/Lilrb4a/Ccl2/Nr4a3/Il4ra/Il6/Abl2/Ada/Icam1/Gcnt2/Havcr2/Cd44/Plaur/Sele/Adam8/Il1rl2/Ephb4/Slc7a1/Runx1/Anxa1/Itpkb/Cd80/Pdpn/Il1a/Cd86/Il1b/Icos/Shb/Cd160/Dock8/Il15/Ptafr/Ccr5/Tgfbr2/Gcnt1/Icosl/Rasgrp1/Mex3b/Traf6	40
BP	GO:0002040	sprouting angiogenesis	25/997	141/28928	0.177305	5.14451	9.32053	1.6231e-11	8.89782e-10	5.2315e-10	Thbs1/Itga5/Hmox1/Il10/Adamts9/Nr4a1/Ephb4/Hif1a/Nrarp/Glul/Pgf/Sema6a/Epha2/Fgf2/Rhoj/Anxa1/Ptgs2/Cemip2/Plk2/Tgfbr3/Flt1/Stard13/Spred1/Meox2/Flvcr2	25
BP	GO:0007162	negative regulation of cell adhesion	39/997	326/28928	0.119632	3.47113	8.47737	1.64946e-11	8.95281e-10	5.26383e-10	Thbs1/Lilrb4b/Lilrb4a/Rnd1/Hspb1/Ctla4/Il4ra/Abl2/Gcnt2/Havcr2/Cd44/Epha4/Il10/Fam107a/Adam8/Il1rn/Nrarp/Sema6a/Runx1/Sdc4/Spry4/Anxa1/Rgcc/Cd80/Il20rb/Ptpn1/Dusp1/Cd86/Lrrc32/Cebpb/Tnfaip3/Acer2/Cblb/Pf4/Serpine1/Ppara/Tnc/Zc3h12a/Mmp12	39
BP	GO:0032611	interleukin-1 beta production	22/997	110/28928	0.2	5.80301	9.53529	2.26378e-11	1.21667e-09	7.15347e-10	Lilrb4b/Sphk1/Lilrb4a/Hspb1/Errfi1/Il6/Ccl3/Ifi207/Egr1/Ccn1/Nlrp1b/Cx3cr1/F2r/Il1b/Tnfaip3/Ccr5/Ifi213/Inava/Tlr8/S1pr3/Clec7a/Zc3h12a	22
BP	GO:0032649	regulation of type II interferon production	24/997	132/28928	0.181818	5.27546	9.30165	2.37177e-11	1.26233e-09	7.42193e-10	Lilrb4b/Lilrb4a/Pde4b/Abl2/Havcr2/Cd14/Il10/Ripk3/Il1r1/Runx1/Tlr3/Axl/Arid5a/Il20rb/Il1b/Cd160/Tlr8/Slc11a1/Slc7a5/Rasgrp1/Clec7a/Zc3h12a/Il1rl1/Bcl3	24
BP	GO:0030593	neutrophil chemotaxis	21/997	100/28928	0.21	6.09316	9.63909	2.42025e-11	1.27575e-09	7.50081e-10	Tnfaip6/S100a8/Ccl2/Pde4b/Cxcl5/Cxcl2/Ccl3/Cxcl1/S100a9/Csf3r/Fcgr3/Trem1/Il1b/Edn1/Cxcr2/C5ar1/Pf4/Cxcl3/Cxcl10/Tirap/Fcer1g	21
BP	GO:0001780	neutrophil homeostasis	13/997	33/28928	0.393939	11.4302	11.3264	2.70832e-11	1.414e-09	8.31366e-10	Lilrb4a/Pde4b/Il6/Cd44/Hcar2/Csf1/Anxa1/Itpkb/Axl/Cxcr2/Fcgr2b/Slc7a11/Mertk	13
BP	GO:0002526	acute inflammatory response	23/997	122/28928	0.188525	5.47005	9.34774	2.85264e-11	1.4753e-09	8.67408e-10	Il6/Icam1/Adam8/Il1rn/Serpina3n/F3/Ptges/Ptgs2/C2cd4b/Il1a/Il20rb/Fcgr3/Plscr1/Cd163/Il1b/Bdkrb2/Cxcr2/Ccr5/Fcgr2b/Ednrb/Hp/Fcer1g/Tac1	23
BP	GO:0010594	regulation of endothelial cell migration	28/997	181/28928	0.154696	4.48852	8.89487	2.98797e-11	1.53085e-09	9.00067e-10	Thbs1/Hmox1/Hspb1/Stc1/Lcn2/Adamts9/Fgfr1/Hif1a/Glul/Epha2/Fgf2/Rhoj/Anxa1/Robo4/Ptgs2/Rgcc/Plk2/Tgfbr3/Sema4a/Stard13/Map2k3/Spred1/Nr2f2/Anxa3/Gadd45a/Meox2/Sp100/Zc3h12a	28
BP	GO:0002718	regulation of cytokine production involved in immune response	24/997	134/28928	0.179104	5.19672	9.19958	3.30192e-11	1.67603e-09	9.85426e-10	Lilrb4b/Hmox1/Lilrb4a/Nr4a3/Il6/Sema7a/Tnfrsf1b/Il10/Irak3/Il1r1/Tlr3/Axl/Rabgef1/Arid5a/Il1b/Tril/Cd160/Inava/Mavs/Trim6/Clec7a/Tirap/Fcer1g/Traf6	24
BP	GO:1903557	positive regulation of tumor necrosis factor superfamily cytokine production	23/997	123/28928	0.186992	5.42558	9.29276	3.39582e-11	1.70788e-09	1.00415e-09	Thbs1/Ccl2/Hspb1/Il6/Ccl3/Akap12/Havcr2/Cd14/Ccn1/Adam8/Tlr3/Il1a/Arid5a/Fcgr3/Ptafr/Ccr5/Mmp8/Fcgr2b/Mavs/Rasgrp1/Clec7a/Tirap/Fcer1g	23
BP	GO:0050920	regulation of chemotaxis	32/997	235/28928	0.13617	3.95098	8.58161	3.7747e-11	1.88117e-09	1.10604e-09	Thbs1/Tnfaip6/Ccl2/Hspb1/Ccl3/Ccr1/Csf1/Fgfr1/Ccn3/Pgf/Fgf2/S100a14/Ninj1/Ntf3/Cx3cr1/Ccl7/Tubb2b/Dusp1/Trem1/Il1b/Il34/Agrn/Edn1/Cxcr2/C5ar1/Serpine1/S1pr1/Cxcl10/Ptgr1/Tirap/Pla2g7/St6gal1	32
BP	GO:0032651	regulation of interleukin-1 beta production	21/997	104/28928	0.201923	5.85881	9.37832	5.31475e-11	2.62482e-09	1.54327e-09	Lilrb4b/Sphk1/Lilrb4a/Hspb1/Errfi1/Il6/Ccl3/Ifi207/Egr1/Ccn1/Nlrp1b/Cx3cr1/F2r/Tnfaip3/Ccr5/Ifi213/Inava/Tlr8/S1pr3/Clec7a/Zc3h12a	21
BP	GO:0001763	morphogenesis of a branching structure	33/997	252/28928	0.130952	3.79959	8.43318	5.41827e-11	2.65205e-09	1.55928e-09	Areg/Rdh10/Il6/Socs3/Ptch1/Spry2/Cd44/Myc/Il10/Csf1/Fgfr1/Epha7/Clic4/Nrarp/Pgf/Epha2/Fgf2/Foxf1/Tbx3/Map3k13/Adm/Eng/Gdnf/Flt1/Ccl11/Il1b/Edn1/Spry1/Tgfbr2/Yap1/Tnc/Bcl11a/Sox9	33
BP	GO:0050728	negative regulation of inflammatory response	27/997	174/28928	0.155172	4.50233	8.75466	6.24716e-11	3.0307e-09	1.78191e-09	Tnfaip6/Socs3/Ada/Ier3/Tnfrsf1b/Cd44/Il10/Ctla2a/Ccn3/Gpr31b/Foxf1/Cx3cr1/Cdh5/Rb1/Fndc4/Rabgef1/Bcr/Il20rb/Mfhas1/Cd200l1/Tnfaip3/Acod1/Pf4/Ppara/Nt5e/Fcgr2b/Trim65	27
BP	GO:0003158	endothelium development	25/997	150/28928	0.166667	4.83584	8.89881	6.55593e-11	3.1526e-09	1.85358e-09	Nrg1/Stc1/Icam1/Lcn2/Fzd2/Apold1/Clic4/Cdh5/Robo4/Pdpn/Rapgef2/Stard13/Il1b/Edn1/Tjp2/Gja1/Vcl/Slc40a1/Nr2f2/S1pr1/S1pr3/Cxcl10/Ednrb/Flvcr2/Id1	25
BP	GO:0071900	regulation of protein serine/threonine kinase activity	34/997	268/28928	0.126866	3.68101	8.33075	6.66232e-11	3.1759e-09	1.86728e-09	Thbs1/Trib1/Spry2/Epha4/Irak3/Fgfr1/Fgf2/Mst1r/Ip6k2/Ntf3/Spry4/Rgcc/Rb1/Map3k13/Ptpn1/Flt1/Chordc1/Dusp1/Rapgef2/Il1b/Il34/Edn1/Fgd4/Tnfaip3/Spry1/Sfn/Nr2f2/Gadd45a/Pim1/Rasgrp1/Tirap/Adrb2/Fermt2/Traf6	34
BP	GO:0031400	negative regulation of protein modification process	44/997	420/28928	0.104762	3.03967	7.95532	7.18385e-11	3.39499e-09	1.99609e-09	Lilrb4b/Lilrb4a/Hspb1/Errfi1/Socs3/Trib1/Gadd45g/Spry2/Irak3/Hspa1b/Gadd45b/Prkcg/Ntf3/Spry4/Bdkrb1/Rb1/Ncoa7/Rabgef1/Ptpn1/Gclc/Gprc5a/Chordc1/Dusp1/Sqstm1/Il1b/Ogt/Shb/Tppp/Bag2/Ctdsp1/Bdkrb2/Tnfaip3/Spry1/Spred1/Rasd2/Nr2f2/Tspo/Dtx3l/Parp14/Gadd45a/Oga/Igfbp3/Zc3h12a/Prkdc	44
BP	GO:0062012	regulation of small molecule metabolic process	43/997	405/28928	0.106173	3.08061	7.96667	7.70728e-11	3.59181e-09	2.11182e-09	Ch25h/Sik1/Rdh10/Il6/Dab2/Ier3/Egr1/Myc/Hif1a/Ddit4/Anxa1/Ptgs2/Gpr146/Avpr1a/Il1b/Ogt/Entpd1/Pdk4/Rorc/Ptafr/H6pd/Slc4a4/Cpt1a/Plek/Pmaip1/Por/Acsl4/Ppara/Tspo/Fgfr4/Sec14l2/Insig2/Irs2/Slc7a11/Mfsd2a/Sox9/Igfbp3/Isx/Cbfa2t3/Midn/Dgat2/Fgf15/Cda	43
BP	GO:0043491	phosphatidylinositol 3-kinase/protein kinase B signal transduction	39/997	343/28928	0.113703	3.29909	8.09262	7.73137e-11	3.59181e-09	2.11182e-09	Thbs1/Selp/Nrg1/Errfi1/Il6/Csf3/Gcnt2/Spry2/Fgfr1/Adam8/Fgf2/Mst1r/Cx3cr1/Plk3/Ramp3/Axl/Gab2/Eng/F2r/Ptpn1/Flt1/Mfhas1/Pld2/Cd160/Mmp3/Edn1/Rasd2/Ppara/Wdr91/Irs2/Pdgfc/Rasgrp1/Nts/Lox/Osm/Mertk/Fermt2/Hmga1/Bank1	39
BP	GO:0043534	blood vessel endothelial cell migration	23/997	128/28928	0.179688	5.21364	9.02656	7.90036e-11	3.63062e-09	2.13463e-09	Thbs1/Hmox1/Hspb1/Fgfr1/Adam8/Nr4a1/Ephb4/Hif1a/Epha2/Fgf2/Rhoj/Anxa1/Cdh5/Robo4/Ptgs2/Rgcc/Plk2/Tgfbr3/Stard13/Map2k3/Spred1/Gadd45a/Meox2	23
BP	GO:0006925	inflammatory cell apoptotic process	12/997	29/28928	0.413793	12.0062	11.2035	7.94736e-11	3.63062e-09	2.13463e-09	Il6/Plekho2/Cd44/Hcar2/Anxa1/Itpkb/Cxcr2/Ccr5/Fcgr2b/Slc7a11/St6gal1/Hmga1	12
BP	GO:0050886	endocrine process	22/997	117/28928	0.188034	5.45582	9.12426	8.08279e-11	3.66197e-09	2.15307e-09	Nrg1/Dab2/Hcar2/Fgfr1/Inhbb/Runx1/Tbx3/Ece1/F2r/Niban2/Tacr1/Avpr1a/Il1b/Edn1/Gja1/Tspo/Fgfr4/Ednrb/Cry2/Lif/Gal/Tac1	22
BP	GO:1903039	positive regulation of leukocyte cell-cell adhesion	35/997	285/28928	0.122807	3.56325	8.216	8.71828e-11	3.91751e-09	2.30331e-09	Lilrb4b/Selp/Lilrb4a/Ccl2/Nr4a3/Il4ra/Il6/Abl2/Ada/Icam1/Havcr2/Cd44/Sele/Adam8/Il1rl2/Ephb4/Slc7a1/Runx1/Anxa1/Itpkb/Cd80/Il1a/Cd86/Il1b/Icos/Shb/Cd160/Dock8/Il15/Ptafr/Tgfbr2/Gcnt1/Icosl/Rasgrp1/Traf6	35
BP	GO:0009914	hormone transport	44/997	425/28928	0.103529	3.00391	7.86291	1.05524e-10	4.70312e-09	2.76521e-09	Nrg1/Il6/Stxbp4/Dab2/Ildr1/Hcar2/Klf7/Fgfr1/Il1rn/Hif1a/Ccn3/Glul/Inhbb/Runx1/Tbx3/Anxa1/Lrrc8a/Myb/Niban2/Tacr1/Rfx3/Pim3/Il1b/Nos2/Edn1/Gja1/Cpt1a/Acvr1c/Acsl4/Tspo/Fgfr4/Oga/Irs2/Slc7a5/Cry2/Lif/Gal/Igfbp3/Tac1/Osm/Fam3b/Midn/Vip/Hmga1	44
BP	GO:0050670	regulation of lymphocyte proliferation	33/997	259/28928	0.127413	3.6969	8.23691	1.13093e-10	4.99981e-09	2.93965e-09	Lilrb4b/Lilrb4a/Ctla4/Il6/Ada/Tnfrsf1b/Havcr2/Cd44/Il10/Ripk3/Slc7a1/Sdc4/Anxa1/Cd80/Il1a/Il20rb/Tacr1/Cd86/Il1b/Lrrc32/Cebpb/Il15/Prlr/Cblb/Tgfbr2/Tnfrsf9/Icosl/Fcgr2b/Irs2/Tirap/Gal/Tac1/Traf6	33
BP	GO:0031329	regulation of cellular catabolic process	44/997	428/28928	0.102804	2.98286	7.80812	1.32474e-10	5.7688e-09	3.39179e-09	Hmox1/Rnf152/Bcl2l11/Tnfrsf1b/Trim30d/Myc/Il10/Adam8/Hif1a/Trim8/Sh3bp4/Timp3/Plk3/Plk2/Gfap/Trim12c/Vps13c/Ptpn1/Depp1/Sqstm1/Il1b/Scoc/Timp1/Tnfaip3/Slc4a4/Sting1/Snx18/Acer2/Cpt1a/Zkscan3/Tspo/Bag3/Dtx3l/Hspb8/Trim34b/Irs2/Slc7a5/Mfsd2a/Trim6/Qsox1/Adrb2/Trim65/Zc3h12a/Gata4	44
BP	GO:0061448	connective tissue development	38/997	334/28928	0.113772	3.30111	7.99153	1.32752e-10	5.7688e-09	3.39179e-09	Thbs1/Errfi1/Stc1/Gpr4/Egr1/Ccn1/Klf7/Csf1/Fgfr1/Sh3pxd2b/Mex3c/Hif1a/Ccn3/Fgf2/Runx1/Axin2/Id4/Rb1/Arid5a/Sox6/Lmna/Rorc/Edn1/Bbs4/Timp1/Tgfbr2/Por/Zbtb16/Maf/Cytl1/Arrdc3/Sox9/Osr1/Ecm1/Lox/Osr2/Dgat2/Slc25a25	38
BP	GO:0002703	regulation of leukocyte mediated immunity	37/997	319/28928	0.115987	3.36538	8.02604	1.33644e-10	5.7688e-09	3.39179e-09	Lilrb4b/Hmox1/Lilrb4a/Ccl2/Il4ra/Cxcl5/Il6/Cxcl1/Tnfrsf1b/Havcr2/D6Wsu163e/Ripk3/Pvr/Il1r1/Foxf1/Cx3cr1/Tlr3/Il18rap/Gab2/Cd80/Rabgef1/Bcr/Arid5a/Il20rb/Fcgr3/Pld2/Il1b/Aplf/Cd160/Ptafr/Fcgr2b/Mavs/Rasgrp1/Klrb1b/Clec7a/Fcer1g/Traf6	37
BP	GO:0044703	multi-organism reproductive process	33/997	261/28928	0.126437	3.66857	8.18208	1.38842e-10	5.94632e-09	3.49616e-09	Fosb/Itga5/Ccl2/Errfi1/Stc1/Havcr2/Fosl1/Thbd/Junb/Slc2a1/Ptgs2/Adm/Tacr1/Avpr1a/Pappa/Capn2/Klf9/Aplf/Ptafr/Edn1/Abcg2/Timp1/Gja1/Acod1/Ctsl/Acvr1c/A1cf/Nr2f2/Acsl4/Tead4/Stc2/Lif/Mmp12	33
BP	GO:0032760	positive regulation of tumor necrosis factor production	22/997	121/28928	0.181818	5.27546	8.90395	1.60066e-10	6.8022e-09	3.99937e-09	Thbs1/Ccl2/Hspb1/Il6/Ccl3/Akap12/Havcr2/Cd14/Ccn1/Tlr3/Il1a/Arid5a/Fcgr3/Ptafr/Ccr5/Mmp8/Fcgr2b/Mavs/Rasgrp1/Clec7a/Tirap/Fcer1g	22
BP	GO:2001233	regulation of apoptotic signaling pathway	45/997	447/28928	0.100671	2.92098	7.73312	1.62473e-10	6.85136e-09	4.02828e-09	Thbs1/S100a8/Tnfrsf12a/Hmox1/Hspb1/Nrg1/Dab2/Bcl2l11/Tnfsf10/S100a9/Icam1/Ier3/Cd44/Plaur/Myc/Il10/Hspa1b/Fgfr1/Ripk3/Hif1a/Inhbb/Fgf2/Cx3cr1/Ptgs2/Ackr3/Rb1/Gdnf/Nr4a2/Ptpn1/Gclc/Plscr1/Lmna/Il1b/Bdkrb2/Tnfaip3/Pmaip1/Ctsl/Yap1/Serpine1/Fcgr2b/Gsdme/Sp100/Gata4/Osm/Herpud1	45
BP	GO:0046879	hormone secretion	43/997	415/28928	0.103614	3.00638	7.77806	1.67671e-10	7.01657e-09	4.12541e-09	Nrg1/Il6/Stxbp4/Dab2/Ildr1/Hcar2/Klf7/Fgfr1/Il1rn/Hif1a/Ccn3/Glul/Inhbb/Runx1/Tbx3/Anxa1/Lrrc8a/Myb/Niban2/Tacr1/Rfx3/Pim3/Il1b/Nos2/Edn1/Gja1/Cpt1a/Acvr1c/Acsl4/Tspo/Fgfr4/Oga/Irs2/Cry2/Lif/Gal/Igfbp3/Tac1/Osm/Fam3b/Midn/Vip/Hmga1	43
BP	GO:0001667	ameboidal-type cell migration	34/997	278/28928	0.122302	3.5486	8.06712	1.80854e-10	7.51093e-09	4.41608e-09	Thbs1/Akap12/Sema7a/Fgfr1/Hif1a/Schip1/Ccn3/Sema6a/Fgf2/Sdc4/Sema6b/Vim/Gab2/Tgfbr3/Gdnf/Tacr1/Ptprr/Sema4a/Sema4c/Edn1/Timp1/Gja1/Sema6d/Tgfbr2/Acvr1c/Has1/Zfand5/Serpine1/Ednrb/Irs2/Sox9/Tac1/Mmp12/Fgf15	34
BP	GO:0140353	lipid export from cell	16/997	62/28928	0.258065	7.48775	9.66169	2.17226e-10	8.95363e-09	5.26431e-09	Nrg1/Dab2/Runx1/Ptges/Ptgs2/Il1a/Myb/Il1b/Nos2/Edn1/Acsl4/Tspo/Cry2/Gal/Igfbp3/Tac1	16
BP	GO:1902105	regulation of leukocyte differentiation	40/997	372/28928	0.107527	3.1199	7.77488	2.41657e-10	9.88631e-09	5.81268e-09	Tnfaip6/Lilrb4b/Lilrb4a/Hspb1/Ctla4/Il4ra/Il6/Ccl3/Ccr1/Ada/Trib1/Klf10/Cd44/Myc/Il10/Csf1/Adam8/Il1rl2/Ctla2a/Nrarp/Tnfrsf11b/Runx1/Ninj1/Anxa1/Itpkb/Axl/Rb1/Il34/Shb/Cebpb/Rorc/Il15/Tjp2/Pf4/Tgfbr2/Rasgrp1/Lif/Zc3h12a/Prkdc/Traf6	40
BP	GO:0060562	epithelial tube morphogenesis	42/997	404/28928	0.10396	3.01642	7.71119	2.46716e-10	1.00185e-08	5.8904e-09	Areg/Rdh10/Abl2/Ptch1/Lcn2/Spry2/Cd44/Myc/Epha4/Csf1/Epha7/Clic4/Hif1a/Nrarp/Pgf/Epha2/Fgf2/Sdc4/Foxf1/Tbx3/Adm/Asb2/Eng/Gdnf/Flt1/Stard13/Ccl11/Sema4c/Edn1/Bbs4/Gja1/Cxcr2/Spry1/Tgfbr2/Yap1/Cxcl10/Tnc/Sox9/Osr1/Gata4/Kif20b/Traf6	42
BP	GO:0001837	epithelial to mesenchymal transition	26/997	172/28928	0.151163	4.386	8.41477	2.54166e-10	1.02451e-08	6.02366e-09	Il6/Dab2/Gcnt2/Spry2/Epha4/Fgfr1/Adam8/Hif1a/Tbx3/Axin2/Rgcc/Tgfbr3/Eng/Usf3/Pdpn/Kbtbd8/Il1b/Tasor/Aplf/Edn1/Gja1/Spry1/Spred1/Tgfbr2/Sox9/Fermt2	26
BP	GO:1903531	negative regulation of secretion by cell	28/997	198/28928	0.141414	4.10314	8.27793	2.57621e-10	1.03086e-08	6.06096e-09	Hmox1/Nrg1/Il6/Tnfrsf1b/Klf7/Il1rn/Ccn3/Inhbb/Ptgs1/Foxf1/Anxa1/Rhbdf1/Rabgef1/Bcr/F2r/Pim3/Il1b/Entpd1/Edn1/Gja1/Acvr1c/Acsl4/Tspo/Cry2/Lif/Igfbp3/Osm/Midn	28
BP	GO:0032755	positive regulation of interleukin-6 production	21/997	113/28928	0.185841	5.39218	8.83824	2.72289e-10	1.08166e-08	6.35964e-09	Il6/Ereg/Ccn1/Il1rl2/Tlr3/Il1a/F2r/Arid5a/Il1b/Rab7b/Nos2/Ptafr/Ccr5/Inava/Tlr8/Mavs/Clec7a/Tirap/Fcer1g/Il17ra/Traf6	21
BP	GO:0019216	regulation of lipid metabolic process	41/997	390/28928	0.105128	3.0503	7.70183	2.87455e-10	1.12693e-08	6.62581e-09	Ch25h/Sphk1/Sik1/Rdh10/Dab2/Hcar2/Egr1/Ccn1/Bcl11b/Anxa1/Ptgs2/Gpr146/Il1a/Adgrf5/Avpr1a/Il1b/Capn2/Ogt/Pdk4/Crebl2/Rorc/Bbs4/H6pd/Cpt1a/Cidec/Por/Acsl4/Ppara/Tspo/Fgfr4/Sec14l2/Angptl4/Insig2/Irs2/Mfsd2a/Sox9/Gal/Slc27a1/Isx/Dgat2/Fgf15	41
BP	GO:0097193	intrinsic apoptotic signaling pathway	38/997	343/28928	0.110787	3.21449	7.79487	2.87796e-10	1.12693e-08	6.62581e-09	S100a8/Hmox1/Hspb1/Bcl2l11/Ifi207/S100a9/Ier3/Tnfrsf1b/Cd44/Plaur/Myc/Il10/Nlrp1b/Ripk3/Hif1a/Epha2/Fgf2/Ddit4/Ptgs2/Ackr3/Ptpn1/Plscr1/Rnf186/Cebpb/Bdkrb2/Pmaip1/Sfn/Bcl2a1a/Ifi213/Bcl2a1d/Fcgr2b/Gsdme/Bcl2a1b/Gata4/Prkdc/Herpud1/Bcl3/Ifi204	38
BP	GO:0006869	lipid transport	45/997	456/28928	0.0986842	2.86333	7.57737	3.10431e-10	1.20694e-08	7.09622e-09	Thbs1/Nrg1/Slc10a6/Nfkbia/Dab2/Ptch1/Lrat/Runx1/Abcc1/Slc2a1/Anxa1/Ptges/Ptgs2/Slc66a2/Il1a/Vps13c/Myb/Plscr1/Il1b/Plin2/Nos2/Edn1/Crot/Abcg2/Slc43a3/Slc27a2/Bdkrb2/Gramd1a/Ldlrap1/Cidec/Acsl4/Tspo/Atp8a1/Osbpl1a/Irs2/Scarb2/Npc1l1/Mfsd2a/Cry2/Gal/Igfbp3/Tac1/Slc27a1/Slc10a5/Fgf15	45
BP	GO:0007204	positive regulation of cytosolic calcium ion concentration	28/997	200/28928	0.14	4.06211	8.20991	3.26461e-10	1.25604e-08	7.38494e-09	Cxcl2/Ccl3/Abl2/Ccr1/Cxcl1/Fzd2/Ccr8/Cx3cr1/Gpr35/Ackr3/Adm/F2r/Ccrl2/Tacr1/Avpr1a/Xcr1/Il1b/Edn1/Bdkrb2/Gja1/Cxcr2/Ccr5/C5ar1/Cxcl3/Fpr1/Oga/Ednrb/Tac1	28
BP	GO:0051896	regulation of phosphatidylinositol 3-kinase/protein kinase B signal transduction	35/997	299/28928	0.117057	3.39641	7.86955	3.27644e-10	1.25604e-08	7.38494e-09	Thbs1/Selp/Nrg1/Il6/Csf3/Gcnt2/Spry2/Fgfr1/Adam8/Fgf2/Mst1r/Cx3cr1/Plk3/Ramp3/Axl/Eng/F2r/Ptpn1/Flt1/Mfhas1/Pld2/Mmp3/Rasd2/Ppara/Wdr91/Irs2/Pdgfc/Rasgrp1/Nts/Lox/Osm/Mertk/Fermt2/Hmga1/Bank1	35
BP	GO:0051251	positive regulation of lymphocyte activation	38/997	346/28928	0.109827	3.18662	7.73075	3.70029e-10	1.40868e-08	8.28237e-09	Lilrb4b/Lilrb4a/Ccl2/Il4ra/Il6/Abl2/Ada/Havcr2/Il10/Adam8/Il1rl2/Ephb4/Slc7a1/Runx1/Anxa1/Itpkb/Axl/Cd80/Il1a/Tacr1/Cd86/Il1b/Icos/Shb/Cd160/Dock8/Il15/Prlr/Tnip2/Tgfbr2/Icosl/Irs2/Rasgrp1/Clec7a/Tirap/Tac1/Prkdc/Traf6	38
BP	GO:0051384	response to glucocorticoid	25/997	163/28928	0.153374	4.45016	8.34559	4.08865e-10	1.54579e-08	9.08853e-09	Fosb/Areg/Ccl2/Il6/Cxcl2/Stc1/Fosl1/Il10/Fam107a/Il1rn/Ddit4/Axin2/Anxa1/Ptgs2/Adm/Gdnf/Avpr1a/Cpn1/Pappa/Klf9/Ptafr/Edn1/Ctsl/Por/Anxa3	25
BP	GO:0030856	regulation of epithelial cell differentiation	26/997	177/28928	0.146893	4.2621	8.22457	4.822e-10	1.81056e-08	1.06453e-08	Maff/Errfi1/Ptch1/Spry2/Klf7/Apold1/Fgf2/Tbx3/Cdh5/Il1a/Gdnf/Rfx3/Il1b/Cebpb/Prlr/Spry1/Spred1/Sfn/Yap1/Vcl/Serpine1/S1pr3/Lif/Sox9/Osr1/Id1	26
BP	GO:0002695	negative regulation of leukocyte activation	28/997	204/28928	0.137255	3.98246	8.07649	5.19216e-10	1.93629e-08	1.13845e-08	Lilrb4b/Lilrb4a/Hspb1/Ctla4/Il4ra/Havcr2/Cd44/Il10/Nrarp/Runx1/Sdc4/Anxa1/Axl/Cd80/Rabgef1/Il20rb/Adgrf5/Cd86/Lrrc32/Cebpb/Tnfaip3/Cblb/Pf4/Fcgr2b/Gal/Zc3h12a/Mertk/Bank1	28
BP	GO:0051091	positive regulation of DNA-binding transcription factor activity	29/997	218/28928	0.133028	3.8598	8.00762	5.42404e-10	2.00909e-08	1.18125e-08	Sphk1/Il6/Trim30d/Fzd2/Il10/Irak3/Hspa1b/Ripk3/Trim8/Tlr3/Il18rap/Rgcc/Map3k13/Tgfbr3/Trim12c/Il1b/Rab7b/Edn1/Sting1/Anxa3/Fcgr2b/Mavs/Cytl1/Clec7a/Tirap/Sp100/Nts/Ifrd1/Traf6	29
BP	GO:0002768	immune response-regulating cell surface receptor signaling pathway	36/997	320/28928	0.1125	3.26419	7.69486	5.54006e-10	2.03829e-08	1.19842e-08	Lilrb4b/Lilrb4a/Pde4b/Nr4a3/Ctla4/Ada/Nfkbia/Cd14/Blnk/S100a14/Ninj1/Rabgef1/Fcgr3/Mfhas1/Plscr1/Sqstm1/Tril/Clec4d/Rab7b/Shb/Cd160/Znrf1/Tnfaip3/Acod1/Tnip2/Cblb/C5ar1/Clec4e/Fpr1/Bcl2a1d/Icosl/Clec7a/Tirap/Fcer1g/Zc3h12a/Traf6	36
BP	GO:0002444	myeloid leukocyte mediated immunity	22/997	129/28928	0.170543	4.9483	8.49127	5.76408e-10	2.10658e-08	1.23857e-08	Hmox1/Nr4a3/Il4ra/Cxcl5/Ccl3/Cxcl1/D6Wsu163e/Stx11/Foxf1/Cx3cr1/Gab2/Rabgef1/Bcr/Fcgr3/Pld2/Trem1/Ptafr/Anxa3/Fcgr2b/Mavs/Rasgrp1/Fcer1g	22
BP	GO:0007249	canonical NF-kappaB signal transduction	34/997	291/28928	0.116838	3.39007	7.74195	6.15129e-10	2.23148e-08	1.31201e-08	Lilrb4b/Lilrb4a/Hspb1/Abl2/Nfkbia/Tnfsf10/Trim30d/Irak3/Adam8/Trim8/Cx3cr1/Tlr3/Tgfbr3/Per1/Trim12c/Il1a/F2r/Sqstm1/Il1b/Clec4d/Edn1/Tnfaip3/Tnip2/Inava/Tlr8/Trim34b/Ednrb/Trim6/Clec7a/Tirap/Nfkb2/Zc3h12a/Bcl3/Traf6	34
BP	GO:0051250	negative regulation of lymphocyte activation	26/997	179/28928	0.145251	4.21448	8.15045	6.18726e-10	2.23148e-08	1.31201e-08	Lilrb4b/Lilrb4a/Hspb1/Ctla4/Il4ra/Havcr2/Cd44/Il10/Nrarp/Runx1/Sdc4/Anxa1/Axl/Cd80/Il20rb/Cd86/Lrrc32/Cebpb/Tnfaip3/Cblb/Pf4/Fcgr2b/Gal/Zc3h12a/Mertk/Bank1	26
BP	GO:0016525	negative regulation of angiogenesis	21/997	118/28928	0.177966	5.16369	8.56257	6.27997e-10	2.25012e-08	1.32296e-08	Thbs1/Adamts1/Ccl2/Gpr4/Spry2/Adamts9/Sema6a/Epha2/Rgcc/Plk2/Flt1/Sema4a/Stard13/Cd160/Spred1/Pf4/Serpine1/Gadd45a/Cxcl10/Adrb2/Lif	21
BP	GO:0046631	alpha-beta T cell activation	28/997	206/28928	0.135922	3.94379	8.01105	6.51738e-10	2.32002e-08	1.36406e-08	Lilrb4b/Lilrb4a/Il4ra/Il6/Abl2/Ada/Gadd45g/Cd44/Myc/Bcl11b/Runx1/Anxa1/Itpkb/Cd80/Myb/Irf4/Sema4a/Shb/Cd160/Cebpb/Rorc/Il15/Cblb/Pf4/Tgfbr2/Ctsl/Zc3h12a/Bcl3	28
BP	GO:0051048	negative regulation of secretion	29/997	220/28928	0.131818	3.82471	7.94584	6.74349e-10	2.38502e-08	1.40228e-08	Hmox1/Nrg1/Il6/Ada/Tnfrsf1b/Klf7/Il1rn/Ccn3/Inhbb/Ptgs1/Foxf1/Anxa1/Rhbdf1/Rabgef1/Bcr/F2r/Pim3/Il1b/Entpd1/Edn1/Gja1/Acvr1c/Acsl4/Tspo/Cry2/Lif/Igfbp3/Osm/Midn	29
BP	GO:0002688	regulation of leukocyte chemotaxis	23/997	143/28928	0.160839	4.66676	8.30468	7.81688e-10	2.72943e-08	1.60478e-08	Thbs1/Tnfaip6/Ccl2/Ccl3/Ccr1/Csf1/Ccn3/Pgf/S100a14/Ninj1/Cx3cr1/Ccl7/Dusp1/Trem1/Il1b/Il34/Edn1/Cxcr2/C5ar1/Serpine1/Cxcl10/Tirap/Pla2g7	23
BP	GO:0034341	response to type II interferon	23/997	143/28928	0.160839	4.66676	8.30468	7.81688e-10	2.72943e-08	1.60478e-08	Ccl2/Stxbp4/Stx11/Zyx/Ifitm1/Vim/Tlr3/Flnb/Cxcl16/Rab7b/Nos2/Edn1/Gbp2b/Acod1/Ifitm6/Gbp8/Parp14/Cdc42ep2/Slc11a1/Pim1/Gbp2/Sp100/Myo1c	23
BP	GO:2000181	negative regulation of blood vessel morphogenesis	21/997	120/28928	0.175	5.07763	8.45665	8.65966e-10	3.00457e-08	1.76655e-08	Thbs1/Adamts1/Ccl2/Gpr4/Spry2/Adamts9/Sema6a/Epha2/Rgcc/Plk2/Flt1/Sema4a/Stard13/Cd160/Spred1/Pf4/Serpine1/Gadd45a/Cxcl10/Adrb2/Lif	21
BP	GO:0035458	cellular response to interferon-beta	16/997	68/28928	0.235294	6.82707	9.08893	9.62068e-10	3.31585e-08	1.94956e-08	Ifi207/Tlr3/Ifit1/Gm5431/Capn2/Gbp2b/Acod1/Sting1/Ifi213/Mavs/Trim6/Gbp2/Ifit3/Ifi211/9930111J21Rik1/Ifi204	16
BP	GO:0070498	interleukin-1-mediated signaling pathway	11/997	28/28928	0.392857	11.3988	10.4008	9.67777e-10	3.31585e-08	1.94956e-08	Il6/Nfkbia/Il1r2/Egr1/Irak3/Il1rl2/Il1rn/Il1r1/Il1b/Tnip2/Traf6	11
BP	GO:1901343	negative regulation of vasculature development	21/997	121/28928	0.173554	5.03567	8.40457	1.01421e-09	3.45334e-08	2.0304e-08	Thbs1/Adamts1/Ccl2/Gpr4/Spry2/Adamts9/Sema6a/Epha2/Rgcc/Plk2/Flt1/Sema4a/Stard13/Cd160/Spred1/Pf4/Serpine1/Gadd45a/Cxcl10/Adrb2/Lif	21
BP	GO:0050866	negative regulation of cell activation	29/997	224/28928	0.129464	3.75641	7.82443	1.03385e-09	3.49849e-08	2.05695e-08	Lilrb4b/Lilrb4a/Hspb1/Ctla4/Il4ra/Havcr2/Cd44/Il10/Nrarp/Runx1/Sdc4/Anxa1/Axl/Cd80/Rabgef1/Il20rb/Adgrf5/Gclc/Cd86/Lrrc32/Cebpb/Tnfaip3/Cblb/Pf4/Fcgr2b/Gal/Zc3h12a/Mertk/Bank1	29
BP	GO:0043535	regulation of blood vessel endothelial cell migration	19/997	99/28928	0.191919	5.56854	8.60274	1.08547e-09	3.65064e-08	2.1464e-08	Thbs1/Hmox1/Hspb1/Fgfr1/Hif1a/Epha2/Fgf2/Rhoj/Anxa1/Robo4/Ptgs2/Rgcc/Plk2/Tgfbr3/Stard13/Map2k3/Spred1/Gadd45a/Meox2	19
BP	GO:0031960	response to corticosteroid	26/997	184/28928	0.141304	4.09995	7.96978	1.13526e-09	3.79483e-08	2.23118e-08	Fosb/Areg/Ccl2/Il6/Cxcl2/Stc1/Fosl1/Il10/Fam107a/Il1rn/Ddit4/Axin2/Anxa1/Ptgs2/Adm/Gdnf/Avpr1a/Cpn1/Pappa/Klf9/Ptafr/Edn1/Pf4/Ctsl/Por/Anxa3	26
BP	GO:0048661	positive regulation of smooth muscle cell proliferation	21/997	122/28928	0.172131	4.99439	8.35305	1.18578e-09	3.93967e-08	2.31634e-08	Thbs1/Adamts1/Hmox1/Nr4a3/Il6/Ereg/Egr1/Myc/Hif1a/Fgf2/Ptgs2/Myb/Flt1/Skp2/Ptafr/Edn1/Ldlrap1/Gja1/Tgfbr2/S1pr1/Traf6	21
BP	GO:0001649	osteoblast differentiation	30/997	242/28928	0.123967	3.59691	7.66452	1.52873e-09	5.04848e-08	2.96827e-08	Cebpd/Tnfaip6/Areg/Il6/Ccl3/Fhl2/Ptch1/Ccn1/Fgfr1/Sh3pxd2b/Id3/Junb/Epha2/Fgf2/Axin2/Ifitm1/Id4/Tgfbr3/Lmna/Cebpb/Jund/Gja1/Yap1/Tmem119/Sox9/Igfbp3/Lox/Id1/Fermt2/Ifi204	30
BP	GO:0046883	regulation of hormone secretion	37/997	348/28928	0.106322	3.08493	7.39276	1.55292e-09	5.09768e-08	2.9972e-08	Nrg1/Il6/Stxbp4/Dab2/Ildr1/Hcar2/Klf7/Fgfr1/Hif1a/Ccn3/Glul/Inhbb/Runx1/Anxa1/Lrrc8a/Myb/Tacr1/Rfx3/Pim3/Il1b/Nos2/Edn1/Gja1/Cpt1a/Acvr1c/Acsl4/Tspo/Fgfr4/Oga/Irs2/Cry2/Lif/Gal/Igfbp3/Tac1/Osm/Midn	37
BP	GO:0030198	extracellular matrix organization	36/997	333/28928	0.108108	3.13676	7.4095	1.64564e-09	5.34162e-08	3.14062e-08	Adamts1/Adamts4/Mmp19/Il6/Abl2/Mpzl3/Crispld2/Tnfrsf1b/Ccn1/Adamts9/Sh3pxd2b/Adamts6/Tnfrsf11b/Foxf1/Axin2/Rgcc/Rb1/Tgfbr3/Gfap/Eng/Pdpn/Adamts3/Mmp3/Mmp8/Has1/Mmp10/Flrt2/Fgfr4/Adamts10/Abi3bp/Qsox1/Nfkb2/Sox9/Lox/Mmp12/Bcl3	36
BP	GO:0001959	regulation of cytokine-mediated signaling pathway	24/997	161/28928	0.149068	4.32522	7.9936	1.64672e-09	5.34162e-08	3.14062e-08	Sphk1/Il6/Il1r2/Cish/Irak3/Hspa1b/Csf1/Il1rn/Hif1a/Tnfrsf11b/Il1r1/Naip6/Axl/Rabgef1/Edn1/Tjp2/Sting1/Mmp8/Parp14/Stat2/Mavs/Trim6/Ecm1/Mmp12	24
BP	GO:0046942	carboxylic acid transport	39/997	381/28928	0.102362	2.97004	7.31331	1.67998e-09	5.41743e-08	3.18519e-08	Thbs1/Emb/Slc10a6/Myc/Il1rn/Slc7a1/Abcc1/Slc2a1/Anxa1/Ptges/Kcnk1/Ptgs2/Gfap/Lrrc8a/Il1a/Slc16a6/Avpr1a/Il1b/Plin2/Rgs4/Nos2/Edn1/Crot/Abcg2/Slc43a3/Slc27a2/Bdkrb2/Gja1/Acsl4/Slc23a2/Slc11a1/Irs2/Slc7a5/Slc7a11/Slc38a9/Mfsd2a/Slc27a1/Slc10a5/Fgf15	39
BP	GO:0001818	negative regulation of cytokine production	35/997	318/28928	0.110063	3.19348	7.43095	1.72274e-09	5.52283e-08	3.24717e-08	Thbs1/Lilrb4b/Hmox1/Lilrb4a/Errfi1/Il6/Il1r2/Havcr2/Il10/Irak3/Fgfr1/Inhbb/Epha2/Cx3cr1/Anxa1/Axl/Rgcc/Rabgef1/Tia1/Il20rb/Flt1/Lrrc32/Tnfaip3/Acod1/Ppara/Tspo/Tlr8/Fgfr4/Slc11a1/Fcgr2b/Zc3h12a/Il1rl1/Mertk/Bcl3/Bank1	35
BP	GO:0018212	peptidyl-tyrosine modification	34/997	303/28928	0.112211	3.25581	7.45775	1.77879e-09	5.65545e-08	3.32514e-08	Lilrb4b/Areg/Itga5/Lilrb4a/Nrg1/Errfi1/Il6/Abl2/Socs3/Csf3/Icam1/Cd44/Epha4/Fgfr1/Epha7/Rap2b/Ntf3/Cd80/Gdnf/Ptpn1/Flt1/Gprc5a/Il34/Tpst2/Il15/Prlr/Agrn/Fgfr4/Parp14/Pdgfc/Clec7a/Lif/Osm/Bank1	34
BP	GO:0045229	external encapsulating structure organization	36/997	334/28928	0.107784	3.12737	7.38814	1.78474e-09	5.65545e-08	3.32514e-08	Adamts1/Adamts4/Mmp19/Il6/Abl2/Mpzl3/Crispld2/Tnfrsf1b/Ccn1/Adamts9/Sh3pxd2b/Adamts6/Tnfrsf11b/Foxf1/Axin2/Rgcc/Rb1/Tgfbr3/Gfap/Eng/Pdpn/Adamts3/Mmp3/Mmp8/Has1/Mmp10/Flrt2/Fgfr4/Adamts10/Abi3bp/Qsox1/Nfkb2/Sox9/Lox/Mmp12/Bcl3	36
BP	GO:0043062	extracellular structure organization	36/997	335/28928	0.107463	3.11803	7.36685	1.9349e-09	6.09603e-08	3.58418e-08	Adamts1/Adamts4/Mmp19/Il6/Abl2/Mpzl3/Crispld2/Tnfrsf1b/Ccn1/Adamts9/Sh3pxd2b/Adamts6/Tnfrsf11b/Foxf1/Axin2/Rgcc/Rb1/Tgfbr3/Gfap/Eng/Pdpn/Adamts3/Mmp3/Mmp8/Has1/Mmp10/Flrt2/Fgfr4/Adamts10/Abi3bp/Qsox1/Nfkb2/Sox9/Lox/Mmp12/Bcl3	36
BP	GO:0015849	organic acid transport	39/997	383/28928	0.101828	2.95453	7.27501	1.95037e-09	6.10968e-08	3.5922e-08	Thbs1/Emb/Slc10a6/Myc/Il1rn/Slc7a1/Abcc1/Slc2a1/Anxa1/Ptges/Kcnk1/Ptgs2/Gfap/Lrrc8a/Il1a/Slc16a6/Avpr1a/Il1b/Plin2/Rgs4/Nos2/Edn1/Crot/Abcg2/Slc43a3/Slc27a2/Bdkrb2/Gja1/Acsl4/Slc23a2/Slc11a1/Irs2/Slc7a5/Slc7a11/Slc38a9/Mfsd2a/Slc27a1/Slc10a5/Fgf15	39
BP	GO:0045444	fat cell differentiation	32/997	274/28928	0.116788	3.38862	7.5056	1.9783e-09	6.16195e-08	3.62294e-08	Cebpd/Nr4a3/Jdp2/Medag/Sh3pxd2b/Nr4a1/Mex3c/Fam120b/Inhbb/Axin2/Id4/Ptgs2/Egr2/Atat1/Nr4a2/Adgrf5/Lmo3/Steap4/Cebpb/Crebl2/Rorc/Bbs4/Tph1/Aloxe3/Yap1/Zbtb16/Pim1/Runx1t1/Adrb2/Zc3h12a/Napepld/Fermt2	32
BP	GO:0001781	neutrophil apoptotic process	8/997	13/28928	0.615385	17.8554	11.4843	2.13699e-09	6.61863e-08	3.89144e-08	Il6/Cd44/Hcar2/Anxa1/Itpkb/Cxcr2/Fcgr2b/Slc7a11	8
BP	GO:0042098	T cell proliferation	30/997	246/28928	0.121951	3.53842	7.55409	2.26304e-09	6.96967e-08	4.09784e-08	Lilrb4b/Lilrb4a/Ctla4/Il6/Tnfrsf1b/Havcr2/Cd44/Myc/Ripk3/Slc7a1/Sdc4/Anxa1/Ctps1/Cd80/Il1a/Il20rb/Cd86/Il1b/Lrrc32/Cebpb/Dock8/Il15/Gja1/Cblb/Tgfbr2/Tnfrsf9/Slc11a1/Icosl/Rasgrp1/Traf6	30
BP	GO:0002507	tolerance induction	11/997	30/28928	0.366667	10.6388	9.97948	2.31092e-09	7.07736e-08	4.16116e-08	Lilrb4b/Lilrb4a/Havcr2/Irak3/Runx1/Cd86/Icos/Tnfaip3/Acod1/Cblb/Tgfbr2	11
BP	GO:0007565	female pregnancy	29/997	232/28928	0.125	3.62688	7.58979	2.35511e-09	7.13299e-08	4.19387e-08	Fosb/Itga5/Ccl2/Errfi1/Stc1/Havcr2/Fosl1/Thbd/Junb/Slc2a1/Ptgs2/Adm/Pappa/Capn2/Klf9/Aplf/Abcg2/Timp1/Gja1/Acod1/Ctsl/Acvr1c/A1cf/Nr2f2/Acsl4/Tead4/Stc2/Lif/Mmp12	29
BP	GO:0061138	morphogenesis of a branching epithelium	29/997	232/28928	0.125	3.62688	7.58979	2.35511e-09	7.13299e-08	4.19387e-08	Areg/Rdh10/Il6/Socs3/Ptch1/Spry2/Cd44/Myc/Il10/Csf1/Fgfr1/Clic4/Nrarp/Pgf/Epha2/Fgf2/Foxf1/Tbx3/Adm/Eng/Gdnf/Flt1/Ccl11/Edn1/Spry1/Tgfbr2/Yap1/Tnc/Sox9	29
BP	GO:0002573	myeloid leukocyte differentiation	33/997	292/28928	0.113014	3.2791	7.39527	2.56811e-09	7.73539e-08	4.54804e-08	Tnfaip6/Lilrb4b/Lilrb4a/Ccl3/Sbno2/Ccr1/Trib1/Csf3/Klf10/Ifi207/Myc/Csf1/Adam8/Junb/Tnfrsf11b/Epha2/Runx1/Ninj1/Rb1/Gab2/Irf4/Il34/Batf2/Cebpb/Il15/Tjp2/Tgfbr2/Ifi213/Lif/Fcer1g/Cbfa2t3/Il1rl1/Traf6	33
BP	GO:0072593	reactive oxygen species metabolic process	31/997	263/28928	0.117871	3.42002	7.44865	2.82064e-09	8.44959e-08	4.96796e-08	Thbs1/Cxcl1/Ier3/Lcn2/Ccn1/Sh3pxd2b/Ripk3/Hif1a/Ddit4/Hba-a1/Bcr/Slc5a3/Hbb-bt/Ogt/Pdk4/Cryab/Nos2/Mmp3/Edn1/Acod1/Pmaip1/Tgfbr2/Inava/Ppara/Tspo/Plau/Gadd45a/Prdx6/Ptgr1/Clec7a/Zc3h12a	31
BP	GO:0043122	regulation of canonical NF-kappaB signal transduction	31/997	265/28928	0.116981	3.39421	7.39743	3.38916e-09	1.00975e-07	5.93685e-08	Lilrb4b/Lilrb4a/Hspb1/Abl2/Nfkbia/Tnfsf10/Trim30d/Irak3/Trim8/Cx3cr1/Tlr3/Tgfbr3/Per1/Trim12c/Il1a/F2r/Sqstm1/Il1b/Clec4d/Edn1/Tnfaip3/Tnip2/Inava/Tlr8/Trim34b/Ednrb/Trim6/Clec7a/Tirap/Zc3h12a/Traf6	31
BP	GO:0071675	regulation of mononuclear cell migration	23/997	154/28928	0.149351	4.33342	7.8362	3.45409e-09	1.02284e-07	6.0138e-08	Thbs1/Ccl2/Ccl3/Abl2/Ccr1/Csf1/Ripk3/Adam8/Ccn3/S100a14/Ninj1/Cx3cr1/Ccl7/Bcr/Dusp1/Trem1/Il34/Dock8/C5ar1/Serpine1/Cxcl10/Ecm1/Pla2g7	23
BP	GO:0060252	positive regulation of glial cell proliferation	11/997	31/28928	0.354839	10.2957	9.78342	3.47041e-09	1.02284e-07	6.0138e-08	Nrg1/Il6/Myc/Cysltr1/Vim/Gfap/Myb/Flt1/Il1b/Tspo/Slc7a5	11
BP	GO:0031099	regeneration	29/997	236/28928	0.122881	3.56541	7.47632	3.50209e-09	1.02666e-07	6.03626e-08	Hmox1/Ccl2/Nrg1/Cxcl5/Il6/Ptch1/Epha4/Il10/Ccn3/Ninj1/Anxa1/Axl/Gfap/Adm/Cebpb/Gja1/Cpt1a/Yap1/Serpine1/Tspo/Anxa3/Ndel1/Plau/Slc7a5/Tnc/Lif/Gata4/Bcl9/Ifrd1	29
BP	GO:0045860	positive regulation of protein kinase activity	33/997	296/28928	0.111486	3.23479	7.3015	3.62212e-09	1.05225e-07	6.18671e-08	Thbs1/Nrg1/Ereg/Ccn1/Epha4/Csf1/Fgfr1/Ripk3/Fgf2/Mst1r/Ip6k2/Ntf3/Rgcc/Map3k13/Ptpn1/Flt1/Rapgef2/Map2k3/Il1b/Il34/Prlr/Agrn/Edn1/Fgd4/Slc11a1/Pim1/Pdgfc/Rasgrp1/Tirap/Lrp8/Adrb2/Fermt2/Traf6	33
BP	GO:0060986	endocrine hormone secretion	16/997	74/28928	0.216216	6.27352	8.58163	3.62777e-09	1.05225e-07	6.18671e-08	Nrg1/Dab2/Hcar2/Fgfr1/Inhbb/Runx1/Tbx3/Niban2/Il1b/Gja1/Tspo/Fgfr4/Cry2/Lif/Gal/Tac1	16
BP	GO:0050921	positive regulation of chemotaxis	24/997	169/28928	0.142012	4.12048	7.68659	4.44073e-09	1.28127e-07	7.53325e-08	Thbs1/Ccl2/Hspb1/Ccl3/Ccr1/Csf1/Fgfr1/Pgf/Fgf2/S100a14/Ntf3/Cx3cr1/Ccl7/Trem1/Il1b/Il34/Edn1/Cxcr2/C5ar1/Serpine1/S1pr1/Cxcl10/Tirap/Pla2g7	24
BP	GO:0010721	negative regulation of cell development	34/997	314/28928	0.10828	3.14176	7.20944	4.46654e-09	1.28197e-07	7.53737e-08	Tnfaip6/Lilrb4b/Lilrb4a/Hspb1/Ctla4/Il4ra/Ccl3/Trib1/Cd44/Myc/Epha7/Nrarp/Tnfrsf11b/Runx1/Anxa1/Id4/Rb1/Il1a/Rapgef2/Ccl11/Il1b/Shb/Tjp2/Ctdsp1/Ccr5/Sema6d/Pf4/Tspo/S1pr3/Ednrb/Bcl11a/Zc3h12a/Id1/Ifrd1	34
BP	GO:0018108	peptidyl-tyrosine phosphorylation	33/997	299/28928	0.110368	3.20233	7.23221	4.66708e-09	1.33255e-07	7.83476e-08	Lilrb4b/Areg/Itga5/Lilrb4a/Nrg1/Errfi1/Il6/Abl2/Socs3/Csf3/Icam1/Cd44/Epha4/Fgfr1/Epha7/Rap2b/Ntf3/Cd80/Gdnf/Ptpn1/Flt1/Gprc5a/Il34/Il15/Prlr/Agrn/Fgfr4/Parp14/Pdgfc/Clec7a/Lif/Osm/Bank1	33
BP	GO:0002285	lymphocyte activation involved in immune response	29/997	240/28928	0.120833	3.50598	7.36529	5.15874e-09	1.4653e-07	8.61525e-08	Lilrb4a/Il4ra/Il6/Ada/Icam1/Gadd45g/Havcr2/Il10/Lig4/Stx11/Anxa1/Myb/Irf4/Sema4a/Clec4d/Aplf/Shb/Cd160/Rorc/Tnfaip3/Sema6d/Pf4/Clec4e/Slc11a1/Icosl/Cd180/Fcer1g/Zc3h12a/Bcl3	29
BP	GO:0051347	positive regulation of transferase activity	37/997	364/28928	0.101648	2.94933	7.07103	5.29705e-09	1.49683e-07	8.80063e-08	Thbs1/Nrg1/Trib1/Ereg/Ccn1/Epha4/Csf1/Fgfr1/Ripk3/Fgf2/Mst1r/Ip6k2/Ntf3/Rgcc/Map3k13/Ptpn1/Flt1/Rapgef2/Polg2/Map2k3/Il1b/Il34/Prlr/Agrn/Edn1/Fgd4/Cdc20/Slc11a1/Pim1/Pdgfc/Rasgrp1/Arrdc3/Tirap/Lrp8/Adrb2/Fermt2/Traf6	37
BP	GO:0060759	regulation of response to cytokine stimulus	24/997	171/28928	0.140351	4.07229	7.61279	5.63418e-09	1.57815e-07	9.27877e-08	Sphk1/Il6/Il1r2/Cish/Irak3/Hspa1b/Csf1/Il1rn/Hif1a/Tnfrsf11b/Il1r1/Naip6/Axl/Rabgef1/Edn1/Tjp2/Sting1/Mmp8/Parp14/Stat2/Mavs/Trim6/Ecm1/Mmp12	24
BP	GO:0002548	monocyte chemotaxis	13/997	48/28928	0.270833	7.85824	8.98444	5.64241e-09	1.57815e-07	9.27877e-08	Ccl2/Ccl3/Ccr1/Ccn3/S100a14/Ninj1/Cx3cr1/Anxa1/Flt1/Dusp1/Serpine1/Cxcl10/Pla2g7	13
BP	GO:0070374	positive regulation of ERK1 and ERK2 cascade	28/997	227/28928	0.123348	3.57895	7.36993	5.97007e-09	1.65878e-07	9.75283e-08	Nrg1/Il6/Ccl3/Abl2/Ccr1/Akap12/Sema7a/Icam1/Gcnt2/Havcr2/Spry2/Cd44/Fgf2/Ramp3/Ackr3/Il1a/F2r/Mfhas1/Rapgef2/Il1b/C5ar1/Fgfr4/Pdgfc/Rasgrp1/Tirap/Slc30a10/Fermt2/Fgf15	28
BP	GO:0002429	immune response-activating cell surface receptor signaling pathway	33/997	302/28928	0.109272	3.17052	7.16379	5.9912e-09	1.65878e-07	9.75283e-08	Lilrb4b/Lilrb4a/Pde4b/Nr4a3/Ctla4/Ada/Nfkbia/Cd14/Blnk/S100a14/Ninj1/Rabgef1/Mfhas1/Plscr1/Sqstm1/Tril/Rab7b/Shb/Cd160/Znrf1/Tnfaip3/Acod1/Tnip2/Cblb/C5ar1/Fpr1/Bcl2a1d/Icosl/Clec7a/Tirap/Fcer1g/Zc3h12a/Traf6	33
BP	GO:0033029	regulation of neutrophil apoptotic process	7/997	10/28928	0.7	20.3105	11.5389	6.19961e-09	1.70785e-07	1.00414e-07	Cd44/Hcar2/Anxa1/Itpkb/Cxcr2/Fcgr2b/Slc7a11	7
BP	GO:0031331	positive regulation of cellular catabolic process	30/997	258/28928	0.116279	3.37384	7.23609	6.96463e-09	1.909e-07	1.1224e-07	Hmox1/Rnf152/Bcl2l11/Tnfrsf1b/Trim30d/Myc/Adam8/Hif1a/Trim8/Sh3bp4/Plk3/Plk2/Trim12c/Ptpn1/Sqstm1/Il1b/Scoc/Slc4a4/Sting1/Snx18/Cpt1a/Bag3/Dtx3l/Hspb8/Trim34b/Irs2/Trim6/Adrb2/Trim65/Zc3h12a	30
BP	GO:2000107	negative regulation of leukocyte apoptotic process	17/997	88/28928	0.193182	5.60518	8.17422	7.32717e-09	1.99839e-07	1.17496e-07	Ada/Cd44/Hif1a/Bcl11b/Itpkb/Axl/Dock8/Rorc/Cxcr2/Ccr5/Bcl2a1a/Fcgr2b/Irs2/Fcer1g/St6gal1/Mertk/Bcl3	17
BP	GO:0001659	temperature homeostasis	26/997	201/28928	0.129353	3.75319	7.40023	7.62689e-09	2.06983e-07	1.21696e-07	Il4ra/Gadd45g/Lcn2/Egr1/Il1rn/Ptges/Ptgs2/Rb1/Il1a/Irf4/Sqstm1/Il1b/Ogt/Cebpb/Il15/Prlr/Gja1/Ccr5/Prkab2/Ednrb/Pdgfc/Arrdc3/Adrb2/Slc27a1/Napepld/Id1	26
BP	GO:0042326	negative regulation of phosphorylation	35/997	337/28928	0.103858	3.01343	7.02414	7.87423e-09	2.12643e-07	1.25024e-07	Lilrb4b/Lilrb4a/Hspb1/Errfi1/Socs3/Trib1/Gadd45g/Spry2/Irak3/Gadd45b/Ntf3/Spry4/Bdkrb1/Rb1/Rabgef1/Ptpn1/Gprc5a/Chordc1/Dusp1/Il1b/Ogt/Shb/Ctdsp1/Bdkrb2/Tnfaip3/Spry1/Spred1/Nr2f2/Parp14/Gadd45a/Irs2/Igfbp3/Zc3h12a/Prkdc/Midn	35
BP	GO:0032623	interleukin-2 production	16/997	78/28928	0.205128	5.9518	8.27359	8.15298e-09	2.19091e-07	1.28815e-07	Lilrb4b/Lilrb4a/Pde4b/Abl2/Havcr2/Runx1/Anxa1/Il1a/Il20rb/Irf4/Il1b/Tnfaip3/Slc11a1/Clec7a/Fcer1g/Traf6	16
BP	GO:0042176	regulation of protein catabolic process	37/997	372/28928	0.0994624	2.88591	6.9167	9.49198e-09	2.53829e-07	1.4924e-07	Nrg1/Trib1/Dab2/Ier3/Tnfrsf1b/Csnk1e/Il10/Irak3/Hspa1b/Hspa1a/Adam8/Timp3/Prkcg/Axin2/Plk3/Tiparp/Rhbdf1/Plk2/Gfap/Mgat3/Samd9l/Gclc/Il1b/Ogt/Banp/Nos2/Cdc20/Bag2/Timp1/Tnfaip3/Gja1/Cblb/Wdr91/Sox9/Cbfa2t3/Herpud1/Vip	37
BP	GO:0046890	regulation of lipid biosynthetic process	28/997	233/28928	0.120172	3.48679	7.20061	1.06667e-08	2.83859e-07	1.66896e-07	Sphk1/Sik1/Rdh10/Dab2/Egr1/Ccn1/Anxa1/Ptgs2/Gpr146/Il1a/Adgrf5/Avpr1a/Il1b/Capn2/Ogt/Pdk4/Crebl2/H6pd/Por/Ppara/Tspo/Fgfr4/Sec14l2/Insig2/Mfsd2a/Slc27a1/Dgat2/Fgf15	28
BP	GO:0033674	positive regulation of kinase activity	33/997	310/28928	0.106452	3.0887	6.98543	1.14585e-08	3.03458e-07	1.78419e-07	Thbs1/Nrg1/Ereg/Ccn1/Epha4/Csf1/Fgfr1/Ripk3/Fgf2/Mst1r/Ip6k2/Ntf3/Rgcc/Map3k13/Ptpn1/Flt1/Rapgef2/Map2k3/Il1b/Il34/Prlr/Agrn/Edn1/Fgd4/Slc11a1/Pim1/Pdgfc/Rasgrp1/Tirap/Lrp8/Adrb2/Fermt2/Traf6	33
BP	GO:0002275	myeloid cell activation involved in immune response	19/997	114/28928	0.166667	4.83584	7.75296	1.25909e-08	3.31843e-07	1.95108e-07	Hmox1/Lilrb4a/Nr4a3/Il4ra/Ccl3/Sbno2/Havcr2/D6Wsu163e/Stx11/Foxf1/Cx3cr1/Gab2/Rabgef1/Bcr/Pld2/Ptafr/Anxa3/Rasgrp1/Fcer1g	19
BP	GO:0007599	hemostasis	25/997	192/28928	0.130208	3.778	7.29669	1.28943e-08	3.38213e-07	1.98853e-07	Thbs1/Selp/Lilrb4a/Il6/Plat/Procr/S100a9/Plaur/Prrg4/Thbd/Rap2b/F3/Axl/Pdpn/F2r/Entpd1/Tph1/Plek/Pf4/Prrg1/Serpine1/Plau/Slc7a11/Fcer1g/Mertk	25
BP	GO:1902107	positive regulation of leukocyte differentiation	27/997	221/28928	0.122172	3.54482	7.1749	1.36562e-08	3.54803e-07	2.08607e-07	Lilrb4b/Lilrb4a/Il4ra/Il6/Ccl3/Ccr1/Ada/Trib1/Klf10/Il10/Csf1/Adam8/Il1rl2/Runx1/Ninj1/Anxa1/Itpkb/Axl/Rb1/Il34/Shb/Il15/Tgfbr2/Rasgrp1/Lif/Prkdc/Traf6	27
BP	GO:1903708	positive regulation of hemopoiesis	27/997	221/28928	0.122172	3.54482	7.1749	1.36562e-08	3.54803e-07	2.08607e-07	Lilrb4b/Lilrb4a/Il4ra/Il6/Ccl3/Ccr1/Ada/Trib1/Klf10/Il10/Csf1/Adam8/Il1rl2/Runx1/Ninj1/Anxa1/Itpkb/Axl/Rb1/Il34/Shb/Il15/Tgfbr2/Rasgrp1/Lif/Prkdc/Traf6	27
BP	GO:0032963	collagen metabolic process	20/997	127/28928	0.15748	4.5693	7.61618	1.42916e-08	3.6956e-07	2.17284e-07	Ccl2/Mmp19/Errfi1/Il6/Hif1a/Vim/Rgcc/Tgfbr3/Eng/Myb/F2r/Adamts3/Mmp3/Mmp8/Ctsl/Serpine1/Mmp10/Tram2/Mmp12/Id1	20
BP	GO:0002690	positive regulation of leukocyte chemotaxis	19/997	115/28928	0.165217	4.79379	7.70165	1.46011e-08	3.75789e-07	2.20946e-07	Thbs1/Ccl2/Ccl3/Ccr1/Csf1/Pgf/S100a14/Cx3cr1/Ccl7/Trem1/Il1b/Il34/Edn1/Cxcr2/C5ar1/Serpine1/Cxcl10/Tirap/Pla2g7	19
BP	GO:0015718	monocarboxylic acid transport	25/997	194/28928	0.128866	3.73905	7.23201	1.59275e-08	4.08012e-07	2.39892e-07	Thbs1/Emb/Slc10a6/Myc/Abcc1/Slc2a1/Anxa1/Ptges/Ptgs2/Il1a/Il1b/Plin2/Nos2/Edn1/Crot/Abcg2/Slc43a3/Slc27a2/Bdkrb2/Acsl4/Irs2/Mfsd2a/Slc27a1/Slc10a5/Fgf15	25
BP	GO:0042088	T-helper 1 type immune response	13/997	52/28928	0.25	7.25376	8.52767	1.63447e-08	4.16751e-07	2.4503e-07	Il4ra/Gadd45g/Havcr2/Il1r1/Anxa1/Il18rap/Arid5a/Sema4a/Il1b/Slc11a1/Il1rl1/Bcl3/Traf6	13
BP	GO:0050777	negative regulation of immune response	27/997	223/28928	0.121076	3.51303	7.1175	1.65669e-08	4.20461e-07	2.47212e-07	Lilrb4b/Lilrb4a/Il4ra/Ccr1/Ifi207/Havcr2/Il10/Irak3/Anxa1/Cd80/Bcr/Il20rb/Cd160/Tnfaip3/Acod1/Sfn/Pf4/Ifi213/Parp14/Fcgr2b/Stat2/Mavs/Pim1/Klrb1b/Zc3h12a/Mmp12/Il1rl1	27
BP	GO:0001933	negative regulation of protein phosphorylation	33/997	316/28928	0.10443	3.03005	6.8554	1.83372e-08	4.63246e-07	2.72367e-07	Lilrb4b/Lilrb4a/Hspb1/Errfi1/Socs3/Trib1/Gadd45g/Spry2/Irak3/Gadd45b/Ntf3/Spry4/Bdkrb1/Rb1/Rabgef1/Ptpn1/Gprc5a/Chordc1/Dusp1/Il1b/Ogt/Shb/Ctdsp1/Bdkrb2/Tnfaip3/Spry1/Spred1/Nr2f2/Parp14/Gadd45a/Igfbp3/Zc3h12a/Prkdc	33
BP	GO:1905952	regulation of lipid localization	25/997	196/28928	0.127551	3.7009	7.16819	1.96148e-08	4.93249e-07	2.90007e-07	Thbs1/Nrg1/Nfkbia/Dab2/Ptch1/Lrat/Runx1/Ptges/Hilpda/Il1a/Myb/Il1b/Plin2/Edn1/Ldlrap1/Acsl4/Ppara/Tspo/Atp8a1/Irs2/Cry2/Gal/Igfbp3/Zc3h12a/Tac1	25
BP	GO:0051897	positive regulation of phosphatidylinositol 3-kinase/protein kinase B signal transduction	26/997	211/28928	0.123223	3.57531	7.09346	2.11212e-08	5.28706e-07	3.10854e-07	Thbs1/Selp/Nrg1/Il6/Csf3/Gcnt2/Spry2/Fgfr1/Adam8/Fgf2/Mst1r/Cx3cr1/Ramp3/Axl/Eng/F2r/Flt1/Mfhas1/Pld2/Rasd2/Irs2/Pdgfc/Nts/Osm/Mertk/Fermt2	26
BP	GO:0071902	positive regulation of protein serine/threonine kinase activity	22/997	156/28928	0.141026	4.09187	7.31567	2.20775e-08	5.50132e-07	3.23452e-07	Thbs1/Epha4/Fgfr1/Fgf2/Mst1r/Ip6k2/Ntf3/Rgcc/Map3k13/Ptpn1/Flt1/Rapgef2/Il1b/Il34/Edn1/Fgd4/Pim1/Rasgrp1/Tirap/Adrb2/Fermt2/Traf6	22
BP	GO:0031649	heat generation	10/997	29/28928	0.344828	10.0052	9.16656	2.4943e-08	6.18721e-07	3.63779e-07	Il1rn/Ptges/Ptgs2/Il1a/Il1b/Ccr5/Ednrb/Arrdc3/Adrb2/Slc27a1	10
BP	GO:0046632	alpha-beta T cell differentiation	21/997	145/28928	0.144828	4.20218	7.30327	2.85879e-08	7.05942e-07	4.1506e-07	Lilrb4b/Lilrb4a/Il4ra/Il6/Abl2/Ada/Gadd45g/Bcl11b/Runx1/Anxa1/Itpkb/Myb/Irf4/Sema4a/Shb/Rorc/Pf4/Tgfbr2/Ctsl/Zc3h12a/Bcl3	21
BP	GO:0050730	regulation of peptidyl-tyrosine phosphorylation	28/997	244/28928	0.114754	3.3296	6.90417	2.92963e-08	7.20191e-07	4.23438e-07	Lilrb4b/Areg/Itga5/Lilrb4a/Nrg1/Errfi1/Il6/Socs3/Csf3/Icam1/Cd44/Epha4/Epha7/Rap2b/Ntf3/Cd80/Gdnf/Ptpn1/Gprc5a/Il34/Il15/Agrn/Parp14/Pdgfc/Clec7a/Lif/Osm/Bank1	28
BP	GO:0010717	regulation of epithelial to mesenchymal transition	18/997	108/28928	0.166667	4.83584	7.54539	3.02906e-08	7.41309e-07	4.35855e-07	Il6/Dab2/Gcnt2/Spry2/Epha4/Adam8/Axin2/Rgcc/Tgfbr3/Eng/Usf3/Pdpn/Il1b/Aplf/Spry1/Spred1/Tgfbr2/Fermt2	18
BP	GO:0045862	positive regulation of proteolysis	34/997	339/28928	0.100295	2.91006	6.6835	3.05969e-08	7.45475e-07	4.38304e-07	S100a8/Trib1/Dab2/Bcl2l11/Ifi207/Tnfsf10/S100a9/Tnfrsf1b/Csnk1e/Myc/Ccn1/Epha4/Hspa1b/Hspa1a/Adam8/F3/Axin2/Plk3/Plk2/F2r/Gclc/Il1b/Ogt/Cdc20/Bag2/Acer2/Pmaip1/Acvr1c/Ifi213/Fgfr4/Oga/Clec7a/Cbfa2t3/Herpud1	34
BP	GO:0051348	negative regulation of transferase activity	26/997	215/28928	0.12093	3.5088	6.97592	3.11497e-08	7.55588e-07	4.4425e-07	Lilrb4b/Lilrb4a/Hspb1/Errfi1/Trib1/Gadd45g/Spry2/Irak3/Gadd45b/Spry4/Rb1/Ptpn1/Gprc5a/Chordc1/Dusp1/Il1b/Shb/Bag2/Tnfaip3/Spry1/Spred1/Nr2f2/Dtx3l/Gadd45a/Irs2/Midn	26
BP	GO:0015711	organic anion transport	42/997	477/28928	0.0880503	2.55478	6.46899	3.38255e-08	8.16088e-07	4.79822e-07	Thbs1/Emb/Slc10a6/Myc/Il1rn/Slc7a1/Abcc1/Slc2a1/Anxa1/Ptges/Kcnk1/Ptgs2/Gfap/Lrrc8a/Il1a/Slc16a6/Avpr1a/Il1b/Plin2/Rgs4/Nos2/Edn1/Crot/Abcg2/Slc43a3/Slc27a2/Bdkrb2/Gja1/Slc4a4/Acsl4/Slc23a2/Slc11a1/Irs2/Slc7a5/Slc7a11/Slc38a9/Mfsd2a/Slc27a1/Slc2a3/Slc10a5/Fgf15/Slc25a25	42
BP	GO:0002042	cell migration involved in sprouting angiogenesis	13/997	55/28928	0.236364	6.8581	8.21577	3.39417e-08	8.16088e-07	4.79822e-07	Thbs1/Hmox1/Nr4a1/Ephb4/Fgf2/Rhoj/Anxa1/Ptgs2/Plk2/Tgfbr3/Stard13/Spred1/Meox2	13
BP	GO:0002886	regulation of myeloid leukocyte mediated immunity	15/997	75/28928	0.2	5.80301	7.86873	3.41727e-08	8.18055e-07	4.80978e-07	Hmox1/Il4ra/Cxcl5/Cxcl1/D6Wsu163e/Foxf1/Cx3cr1/Gab2/Rabgef1/Bcr/Fcgr3/Pld2/Ptafr/Mavs/Fcer1g	15
BP	GO:0007596	blood coagulation	24/997	188/28928	0.12766	3.70405	7.02758	3.68955e-08	8.79396e-07	5.17044e-07	Thbs1/Selp/Lilrb4a/Il6/Plat/Procr/S100a9/Plaur/Prrg4/Thbd/Rap2b/F3/Axl/Pdpn/F2r/Entpd1/Plek/Pf4/Prrg1/Serpine1/Plau/Slc7a11/Fcer1g/Mertk	24
BP	GO:0052548	regulation of endopeptidase activity	32/997	310/28928	0.103226	2.9951	6.6724	3.95055e-08	9.3753e-07	5.51223e-07	Thbs1/S100a8/Bcl2l11/Ifi207/Tnfsf10/S100a9/Cd44/Plaur/Myc/Ccn1/Epha4/Hspa1b/Nr4a1/Epha7/Serpina3n/Timp3/F3/Naip6/Serpina3f/Ptgs2/F2r/Cryab/Timp1/Acer2/Pmaip1/Acvr1c/Serpina3m/Ifi213/Serpine1/Bcl2a1d/Clec7a/Serpina3c	32
BP	GO:0070665	positive regulation of leukocyte proliferation	23/997	175/28928	0.131429	3.81341	7.05287	4.09104e-08	9.66684e-07	5.68365e-07	Il6/Ada/Havcr2/Csf1/Slc7a1/Anxa1/Csf2rb2/Cd80/Il1a/Csf2rb/Tacr1/Cd86/Il1b/Il34/Il15/Prlr/Tgfbr2/Icosl/Irs2/Tirap/Tac1/St6gal1/Traf6	23
BP	GO:0032729	positive regulation of type II interferon production	16/997	87/28928	0.183908	5.3361	7.65261	4.20067e-08	9.88329e-07	5.81091e-07	Pde4b/Abl2/Havcr2/Cd14/Il1r1/Runx1/Tlr3/Arid5a/Il1b/Cd160/Tlr8/Slc11a1/Slc7a5/Rasgrp1/Clec7a/Bcl3	16
BP	GO:0043405	regulation of MAP kinase activity	22/997	162/28928	0.135802	3.94031	7.09035	4.42397e-08	1.03642e-06	6.09366e-07	Thbs1/Trib1/Spry2/Epha4/Irak3/Fgfr1/Fgf2/Mst1r/Ntf3/Spry4/Map3k13/Ptpn1/Flt1/Dusp1/Il1b/Il34/Edn1/Fgd4/Spry1/Rasgrp1/Tirap/Traf6	22
BP	GO:0033028	myeloid cell apoptotic process	12/997	47/28928	0.255319	7.4081	8.30669	4.51384e-08	1.05297e-06	6.19098e-07	Il6/Plekho2/Cd44/Hcar2/Anxa1/Itpkb/Cxcr2/Ccr5/Fcgr2b/Slc7a11/Fcer1g/St6gal1	12
BP	GO:0022408	negative regulation of cell-cell adhesion	26/997	219/28928	0.118721	3.44471	6.86114	4.54751e-08	1.05633e-06	6.21074e-07	Lilrb4b/Lilrb4a/Hspb1/Ctla4/Il4ra/Abl2/Havcr2/Cd44/Il10/Adam8/Il1rn/Nrarp/Runx1/Sdc4/Anxa1/Rgcc/Cd80/Il20rb/Cd86/Lrrc32/Cebpb/Tnfaip3/Cblb/Pf4/Ppara/Zc3h12a	26
BP	GO:0002698	negative regulation of immune effector process	21/997	149/28928	0.14094	4.08937	7.14301	4.63939e-08	1.07313e-06	6.30949e-07	Lilrb4b/Hmox1/Lilrb4a/Il4ra/Havcr2/Il10/Irak3/Foxf1/Cx3cr1/Anxa1/Axl/Cd80/Rabgef1/Bcr/Il20rb/Tnfaip3/Pf4/Fcgr2b/Klrb1b/Zc3h12a/Prkdc	21
BP	GO:0097191	extrinsic apoptotic signaling pathway	28/997	250/28928	0.112	3.24969	6.74953	4.94627e-08	1.1393e-06	6.69858e-07	Thbs1/Tnfrsf12a/Hmox1/Nrg1/Dab2/Bcl2l11/Tnfsf10/Icam1/Lcn2/Tnfrsf1b/Hspa1b/Fgfr1/Krt18/Tlr3/Il1a/Gdnf/Gclc/Lmna/Il1b/Tnfaip3/Pmaip1/Yap1/Bcl2a1a/Serpine1/Bag3/Bcl2a1d/Sp100/Bcl2a1b	28
BP	GO:0033673	negative regulation of kinase activity	24/997	191/28928	0.125654	3.64587	6.93139	5.01599e-08	1.15053e-06	6.76457e-07	Lilrb4b/Lilrb4a/Hspb1/Errfi1/Trib1/Gadd45g/Spry2/Irak3/Gadd45b/Spry4/Rb1/Ptpn1/Gprc5a/Chordc1/Dusp1/Il1b/Shb/Tnfaip3/Spry1/Spred1/Nr2f2/Gadd45a/Irs2/Midn	24
BP	GO:0015908	fatty acid transport	19/997	124/28928	0.153226	4.44585	7.26503	5.14816e-08	1.17593e-06	6.91389e-07	Thbs1/Abcc1/Slc2a1/Anxa1/Ptges/Ptgs2/Il1a/Il1b/Plin2/Nos2/Edn1/Crot/Slc43a3/Slc27a2/Bdkrb2/Acsl4/Irs2/Mfsd2a/Slc27a1	19
BP	GO:0002673	regulation of acute inflammatory response	13/997	57/28928	0.22807	6.61747	8.02053	5.37235e-08	1.22204e-06	7.18504e-07	Il6/Adam8/Ptges/Ptgs2/C2cd4b/Il20rb/Fcgr3/Il1b/Ccr5/Fcgr2b/Ednrb/Fcer1g/Tac1	13
BP	GO:0001562	response to protozoan	12/997	48/28928	0.25	7.25376	8.19255	5.83037e-08	1.32075e-06	7.76537e-07	Il4ra/Il6/Ier3/Il10/Irf4/Batf2/Gbp2b/Pf4/Gbp8/Slc11a1/Gbp2/Bcl3	12
BP	GO:0045446	endothelial cell differentiation	19/997	125/28928	0.152	4.41029	7.2191	5.87718e-08	1.32587e-06	7.7955e-07	Nrg1/Stc1/Icam1/Fzd2/Apold1/Clic4/Cdh5/Robo4/Pdpn/Rapgef2/Il1b/Tjp2/Vcl/Nr2f2/S1pr1/S1pr3/Ednrb/Flvcr2/Id1	19
BP	GO:0032677	regulation of interleukin-8 production	15/997	78/28928	0.192308	5.57982	7.65206	5.94494e-08	1.33566e-06	7.85307e-07	Il6/Cd14/Hspa1b/F3/Anxa1/Tlr3/F2r/Il1b/Nos2/Serpine1/Tlr8/Mavs/Clec7a/Tirap/Bcl3	15
BP	GO:0002753	cytoplasmic pattern recognition receptor signaling pathway	24/997	193/28928	0.124352	3.60809	6.86833	6.13269e-08	1.36664e-06	8.03522e-07	Nfkbia/Ifi207/Havcr2/Hspa1b/Nlrp1b/Tlr13/Rnf170/Tlr3/Atat1/Cd86/Ogt/Rab7b/Tnfaip3/Sting1/Tnip2/Slc15a3/Ifi213/Inava/Tlr8/Mavs/Gbp2/Tirap/Prkdc/Traf6	24
BP	GO:0050817	coagulation	24/997	193/28928	0.124352	3.60809	6.86833	6.13269e-08	1.36664e-06	8.03522e-07	Thbs1/Selp/Lilrb4a/Il6/Plat/Procr/S100a9/Plaur/Prrg4/Thbd/Rap2b/F3/Axl/Pdpn/F2r/Entpd1/Plek/Pf4/Prrg1/Serpine1/Plau/Slc7a11/Fcer1g/Mertk	24
BP	GO:0051098	regulation of binding	34/997	349/28928	0.0974212	2.82668	6.48646	6.22665e-08	1.38196e-06	8.1253e-07	Errfi1/Abl2/Dab2/Ifi207/Plaur/Myc/Epha4/Il10/Ip6k2/Pln/Rb1/Irf4/Niban2/Plscr1/Rapgef2/Agrn/Bag2/Ldlrap1/Mdfi/Sting1/Mitd1/Cblb/Fam220a/Ifi213/Dtx3l/Phlda2/Mavs/Runx1t1/Trim6/Lif/Sp100/Lox/Id1/Traf6	34
BP	GO:0009612	response to mechanical stimulus	29/997	269/28928	0.107807	3.12802	6.62486	6.63463e-08	1.46657e-06	8.62277e-07	Fosb/Thbs1/Ccl2/Abl2/Nfkbia/Ptch1/Fosl1/Myc/Fgf2/Slc2a1/Bdkrb1/Tlr3/Ptgs2/Eng/Atat1/Gclc/Tacr1/Il1b/Capn2/Slitrk6/Edn1/Gja1/Bag3/Tlr8/Meis2/Gadd45a/Tnc/Sox9/Gata4	29
BP	GO:0001894	tissue homeostasis	31/997	301/28928	0.10299	2.98826	6.55126	6.7603e-08	1.47815e-06	8.6908e-07	Errfi1/Il6/Ada/Ildr1/Gcnt2/Csf1/Adam8/Tnfrsf11b/Ptgs1/Slc2a1/Ptgs2/Rb1/Slc28a2/Slc28a2b/F2r/Il20rb/Pdk4/Bbs4/Tjp2/Bdkrb2/Yap1/Cracd/Inava/S1pr1/Tmem119/Nt5e/Cytl1/Mfsd2a/Adrb2/Sox9/Traf6	31
BP	GO:0060249	anatomical structure homeostasis	31/997	301/28928	0.10299	2.98826	6.55126	6.7603e-08	1.47815e-06	8.6908e-07	Errfi1/Il6/Ada/Ildr1/Gcnt2/Csf1/Adam8/Tnfrsf11b/Ptgs1/Slc2a1/Ptgs2/Rb1/Slc28a2/Slc28a2b/F2r/Il20rb/Pdk4/Bbs4/Tjp2/Bdkrb2/Yap1/Cracd/Inava/S1pr1/Tmem119/Nt5e/Cytl1/Mfsd2a/Adrb2/Sox9/Traf6	31
BP	GO:0048754	branching morphogenesis of an epithelial tube	24/997	194/28928	0.123711	3.58949	6.83712	6.77362e-08	1.47815e-06	8.6908e-07	Areg/Rdh10/Ptch1/Spry2/Cd44/Myc/Csf1/Clic4/Nrarp/Pgf/Epha2/Fgf2/Foxf1/Tbx3/Eng/Gdnf/Flt1/Ccl11/Edn1/Spry1/Tgfbr2/Yap1/Tnc/Sox9	24
BP	GO:0035710	CD4-positive, alpha-beta T cell activation	20/997	139/28928	0.143885	4.17483	7.08876	6.79483e-08	1.47815e-06	8.6908e-07	Lilrb4a/Il4ra/Il6/Gadd45g/Cd44/Runx1/Anxa1/Myb/Irf4/Sema4a/Shb/Cd160/Cebpb/Rorc/Cblb/Pf4/Tgfbr2/Ctsl/Zc3h12a/Bcl3	20
BP	GO:0045576	mast cell activation	16/997	90/28928	0.177778	5.15823	7.46454	6.91133e-08	1.49755e-06	8.80487e-07	Lilrb4b/Hmox1/Lilrb4a/Nr4a3/Il4ra/D6Wsu163e/Foxf1/Gab2/Rabgef1/Fcgr3/Plscr1/Pld2/Ndrg1/Rasgrp1/Havcr1/Fcer1g	16
BP	GO:0002752	cell surface pattern recognition receptor signaling pathway	15/997	79/28928	0.189873	5.50919	7.58232	7.10628e-08	1.52329e-06	8.95622e-07	Nfkbia/Cd14/S100a14/Ninj1/Mfhas1/Sqstm1/Tril/Rab7b/Znrf1/Tnfaip3/Acod1/Tnip2/Clec7a/Tirap/Traf6	15
BP	GO:0032637	interleukin-8 production	15/997	79/28928	0.189873	5.50919	7.58232	7.10628e-08	1.52329e-06	8.95622e-07	Il6/Cd14/Hspa1b/F3/Anxa1/Tlr3/F2r/Il1b/Nos2/Serpine1/Tlr8/Mavs/Clec7a/Tirap/Bcl3	15
BP	GO:0090049	regulation of cell migration involved in sprouting angiogenesis	11/997	40/28928	0.275	7.97914	8.34505	7.13005e-08	1.52329e-06	8.95622e-07	Thbs1/Hmox1/Fgf2/Rhoj/Anxa1/Ptgs2/Plk2/Tgfbr3/Stard13/Spred1/Meox2	11
BP	GO:0002520	immune system development	27/997	239/28928	0.112971	3.27785	6.68071	7.14128e-08	1.52329e-06	8.95622e-07	Lilrb4b/Lilrb4a/Ada/Bcl2l11/Havcr2/Irak3/Lig4/Ripk3/Bcl11b/Runx1/Pdpn/Myb/Samd9l/Cd86/Icos/Aplf/Rorc/Il15/Tnfaip3/Acod1/Cblb/Tgfbr2/Slc40a1/Icosl/Nfkb2/Prkdc/Bcl3	27
BP	GO:0008630	intrinsic apoptotic signaling pathway in response to DNA damage	18/997	114/28928	0.157895	4.58132	7.23853	7.17536e-08	1.52463e-06	8.96408e-07	Hmox1/Bcl2l11/Ier3/Tnfrsf1b/Cd44/Myc/Epha2/Ddit4/Ackr3/Plscr1/Pmaip1/Sfn/Bcl2a1a/Bcl2a1d/Bcl2a1b/Prkdc/Bcl3/Ifi204	18
BP	GO:0002691	regulation of cellular extravasation	12/997	49/28928	0.244898	7.10573	8.08165	7.48005e-08	1.5711e-06	9.23731e-07	Selp/Ccl2/Icam1/Sele/Ripk3/Adam8/Il1r1/Bcr/Lyve1/Plvap/Ptafr/Gcnt1	12
BP	GO:0043114	regulation of vascular permeability	12/997	49/28928	0.244898	7.10573	8.08165	7.48005e-08	1.5711e-06	9.23731e-07	Akap12/Gpr4/Cdh5/Adm/Bcr/C2cd4b/Tacr1/Plvap/Tjp2/Cxcr2/Ptp4a3/Fermt2	12
BP	GO:1903670	regulation of sprouting angiogenesis	12/997	49/28928	0.244898	7.10573	8.08165	7.48005e-08	1.5711e-06	9.23731e-07	Thbs1/Itga5/Il10/Adamts9/Hif1a/Glul/Sema6a/Fgf2/Rhoj/Cemip2/Flt1/Stard13	12
BP	GO:0010506	regulation of autophagy	32/997	319/28928	0.100313	2.9106	6.48291	7.71001e-08	1.61322e-06	9.48496e-07	Hmox1/Rnf152/Bcl2l11/Trim30d/Il10/Hif1a/Trim8/Sh3bp4/Plk3/Plk2/Gfap/Trim12c/Vps13c/Depp1/Sqstm1/Scoc/Tnfaip3/Sting1/Snx18/Acer2/Zkscan3/Tspo/Bag3/Hspb8/Trim34b/Slc7a5/Trim6/Qsox1/Adrb2/Trim65/Zc3h12a/Gata4	32
BP	GO:0001558	regulation of cell growth	40/997	456/28928	0.0877193	2.54518	6.2836	7.9146e-08	1.64973e-06	9.69962e-07	Tnfrsf12a/Sphk1/Nrg1/Dab2/Sema7a/Cd44/Hspa1b/Hspa1a/Fam107a/Epha7/Ccn3/Sh3bp4/Ip6k2/Bdkrb1/Rb1/Map3k13/Csf2rb/Avpr1a/Pot1b/Rgs4/Cxcl16/Cryab/Edn1/Gja1/Ccr5/Sema6d/Sfn/Yap1/Acsl4/Ppara/Slc23a2/Ndel1/Cirbp/Mfsd2a/Tnc/Bcl11a/Igfbp3/Sin3a/Ifrd1/Cda	40
BP	GO:2000351	regulation of endothelial cell apoptotic process	13/997	59/28928	0.220339	6.39315	7.83445	8.33247e-08	1.73025e-06	1.01731e-06	Thbs1/Abl2/Icam1/Il10/Cdh5/Rgcc/Ptpn1/Cd160/Tnfaip3/Tnip2/Serpine1/Angptl4/Id1	13
BP	GO:0050679	positive regulation of epithelial cell proliferation	27/997	241/28928	0.112033	3.25065	6.62872	8.48739e-08	1.75577e-06	1.03231e-06	Hmox1/Ccl2/Nr4a3/Il6/Stxbp4/Myc/Il10/Fgfr1/Nr4a1/Nrarp/Glul/Pgf/Fgf2/F3/Tacr1/Ccl11/Tnfaip3/C5ar1/Yap1/Irs2/Sox9/Osr1/Ecm1/Mmp12/Id1/Vip/Osr2	27
BP	GO:2001234	negative regulation of apoptotic signaling pathway	28/997	257/28928	0.108949	3.16117	6.57492	8.90786e-08	1.83582e-06	1.07938e-06	Hmox1/Hspb1/Nrg1/Dab2/Icam1/Ier3/Cd44/Plaur/Il10/Hspa1b/Hif1a/Fgf2/Cx3cr1/Ptgs2/Ackr3/Rb1/Gdnf/Nr4a2/Ptpn1/Gclc/Lmna/Il1b/Bdkrb2/Tnfaip3/Yap1/Serpine1/Gata4/Herpud1	28
BP	GO:0062207	regulation of pattern recognition receptor signaling pathway	23/997	183/28928	0.125683	3.6467	6.78586	9.44019e-08	1.93131e-06	1.13552e-06	S100a8/Ifi207/S100a9/Cd14/Irak3/Hspa1b/Ninj1/Rnf170/Atat1/Irf4/Mfhas1/Sqstm1/Ogt/Rab7b/Znrf1/Tnfaip3/Acod1/Slc15a3/Ifi213/Mavs/Gbp2/Tirap/Prkdc	23
BP	GO:0010573	vascular endothelial growth factor production	11/997	41/28928	0.268293	7.78452	8.21327	9.44167e-08	1.93131e-06	1.13552e-06	Ccl2/Il6/Hif1a/Ptgs2/Il1a/Flt1/Adamts3/Il1b/Adgrg1/C5ar1/Gata4	11
BP	GO:0043299	leukocyte degranulation	16/997	92/28928	0.173913	5.04609	7.34376	9.51776e-08	1.93964e-06	1.14042e-06	Hmox1/Nr4a3/Il4ra/Ccl3/D6Wsu163e/Stx11/Foxf1/Gab2/Rabgef1/Bcr/Pld2/Cd160/Ptafr/Anxa3/Rasgrp1/Fcer1g	16
BP	GO:0002286	T cell activation involved in immune response	20/997	142/28928	0.140845	4.08663	6.96616	9.75356e-08	1.97436e-06	1.16083e-06	Il4ra/Il6/Icam1/Gadd45g/Havcr2/Stx11/Anxa1/Myb/Irf4/Sema4a/Clec4d/Shb/Rorc/Sema6d/Pf4/Clec4e/Slc11a1/Fcer1g/Zc3h12a/Bcl3	20
BP	GO:0032663	regulation of interleukin-2 production	14/997	70/28928	0.2	5.80301	7.60126	9.76016e-08	1.97436e-06	1.16083e-06	Lilrb4b/Lilrb4a/Pde4b/Abl2/Havcr2/Runx1/Anxa1/Il1a/Il20rb/Irf4/Il1b/Tnfaip3/Clec7a/Traf6	14
BP	GO:0050878	regulation of body fluid levels	35/997	373/28928	0.0938338	2.72259	6.32633	1.00951e-07	2.03461e-06	1.19625e-06	Thbs1/Selp/Lilrb4a/Il6/Plat/Ada/Procr/S100a9/Plaur/Hif1a/Prrg4/Thbd/Rap2b/Aqp7/F3/Axl/Adm/Pdpn/F2r/Entpd1/Prlr/Edn1/Btc/Tph1/Gja1/Plek/Pf4/Prrg1/Serpine1/Plau/Ednrb/Slc7a11/Adrb2/Fcer1g/Mertk	35
BP	GO:0044060	regulation of endocrine process	13/997	60/28928	0.216667	6.28659	7.7446	1.03034e-07	2.06898e-06	1.21646e-06	Nrg1/Dab2/Fgfr1/Inhbb/Runx1/F2r/Gja1/Tspo/Fgfr4/Cry2/Lif/Gal/Tac1	13
BP	GO:0050870	positive regulation of T cell activation	28/997	259/28928	0.108108	3.13676	6.52613	1.0493e-07	2.09936e-06	1.23433e-06	Lilrb4b/Lilrb4a/Ccl2/Il4ra/Il6/Abl2/Ada/Havcr2/Adam8/Il1rl2/Ephb4/Slc7a1/Runx1/Anxa1/Itpkb/Cd80/Il1a/Cd86/Il1b/Icos/Shb/Cd160/Dock8/Il15/Tgfbr2/Icosl/Rasgrp1/Traf6	28
BP	GO:0007264	small GTPase-mediated signal transduction	39/997	444/28928	0.0878378	2.54862	6.21286	1.10803e-07	2.20882e-06	1.29868e-06	Hmox1/Rnd1/Nrg1/Abl2/Sipa1l2/Rnd3/Gpr4/Baiap2/Spry2/Csf1/Dennd4a/Cyth3/Prag1/Rap2b/Rhoj/Spry4/Spry3/Itpkb/Rb1/Rabgef1/Plk2/Bcr/Pdpn/F2r/Ctnnal1/Rapgef2/Stard13/Arfgef3/Ogt/Cdc42ep3/Adgrg1/Dock8/Eps8l3/Agrn/Spry1/Cdc42ep2/Kctd10/Rasgrp1/Kbtbd7	39
BP	GO:0008217	regulation of blood pressure	26/997	229/28928	0.113537	3.29428	6.58548	1.12293e-07	2.2304e-06	1.31137e-06	Hmox1/Ier3/Gucy1a1/Pgf/Ptgs1/Bdkrb1/Ptgs2/Calca/Adm/Eng/Ece1/F2r/Ptpn1/Tacr1/Avpr1a/Nos2/Ptafr/Edn1/Bbs4/Bdkrb2/Gja1/Nr2f2/Ppara/Ednrb/Adrb2/Tac1	26
BP	GO:0032368	regulation of lipid transport	21/997	157/28928	0.133758	3.88099	6.83865	1.16062e-07	2.29693e-06	1.35049e-06	Thbs1/Nrg1/Nfkbia/Dab2/Ptch1/Lrat/Runx1/Ptges/Il1a/Myb/Il1b/Edn1/Ldlrap1/Acsl4/Tspo/Atp8a1/Irs2/Cry2/Gal/Igfbp3/Tac1	21
BP	GO:0014009	glial cell proliferation	15/997	82/28928	0.182927	5.30763	7.38004	1.19303e-07	2.3526e-06	1.38322e-06	Areg/Nrg1/Il6/Myc/Csf1/Cysltr1/Vim/Rb1/Gfap/Myb/Flt1/Il1b/Il34/Tspo/Slc7a5	15
BP	GO:0006953	acute-phase response	12/997	51/28928	0.235294	6.82707	7.86892	1.20791e-07	2.37222e-06	1.39476e-06	Il6/Il1rn/Serpina3n/Ptges/Ptgs2/Il1a/Plscr1/Cd163/Il1b/Ccr5/Ednrb/Hp	12
BP	GO:0042129	regulation of T cell proliferation	24/997	200/28928	0.12	3.48181	6.65405	1.21164e-07	2.37222e-06	1.39476e-06	Lilrb4b/Lilrb4a/Ctla4/Il6/Tnfrsf1b/Havcr2/Cd44/Ripk3/Slc7a1/Sdc4/Anxa1/Cd80/Il1a/Il20rb/Cd86/Il1b/Lrrc32/Cebpb/Il15/Cblb/Tgfbr2/Tnfrsf9/Icosl/Traf6	24
BP	GO:0071346	cellular response to type II interferon	18/997	118/28928	0.152542	4.42602	7.04556	1.23371e-07	2.40683e-06	1.4151e-06	Ccl2/Stxbp4/Stx11/Zyx/Vim/Tlr3/Flnb/Rab7b/Nos2/Edn1/Gbp2b/Acod1/Gbp8/Parp14/Cdc42ep2/Pim1/Gbp2/Myo1c	18
BP	GO:0032757	positive regulation of interleukin-8 production	13/997	61/28928	0.213115	6.18353	7.65678	1.26831e-07	2.46555e-06	1.44963e-06	Il6/Cd14/Hspa1b/F3/Tlr3/F2r/Il1b/Nos2/Serpine1/Tlr8/Mavs/Clec7a/Tirap	13
BP	GO:0014015	positive regulation of gliogenesis	16/997	94/28928	0.170213	4.93873	7.22643	1.29893e-07	2.51616e-06	1.47938e-06	Nrg1/Il6/Tnfrsf1b/Myc/Cysltr1/Ntf3/Vim/Gfap/Egr2/Myb/Flt1/Il1b/Il34/Tspo/Slc7a5/Lif	16
BP	GO:0071677	positive regulation of mononuclear cell migration	17/997	106/28928	0.160377	4.65336	7.11933	1.30399e-07	2.51707e-06	1.47992e-06	Thbs1/Ccl2/Ccl3/Abl2/Ccr1/Csf1/Adam8/S100a14/Cx3cr1/Ccl7/Trem1/Il34/Dock8/C5ar1/Serpine1/Cxcl10/Pla2g7	17
BP	GO:0045787	positive regulation of cell cycle	34/997	360/28928	0.0944444	2.74031	6.2776	1.31305e-07	2.52566e-06	1.48497e-06	Adamts1/Sphk1/Nr4a3/Stxbp4/Bcl2l11/Fosl1/Ereg/Myc/Il10/Fgfr1/Cenpj/Tbx3/Anxa1/Rgcc/Rb1/Ccne2/Ovol1/Il1a/Plscr1/Il1b/Rad51c/Shb/Edn1/Btc/Cdc20/Gja1/Lsm10/Meis2/Pim1/Prdm9/Hspa2/Gata4/Sin3a/Kif20b	34
BP	GO:0002819	regulation of adaptive immune response	28/997	263/28928	0.106464	3.08905	6.42995	1.44791e-07	2.77532e-06	1.63176e-06	Lilrb4b/Lilrb4a/Il4ra/Il6/Ada/Tnfrsf1b/Havcr2/Cd44/Ripk3/Pvr/Il1r1/Anxa1/Cd80/Arid5a/Il20rb/Fcgr3/Il1b/Aplf/Cd160/Tnfaip3/Pf4/Slc11a1/Fcgr2b/Clec7a/Fcer1g/Zc3h12a/Il1rl1/Traf6	28
BP	GO:0050767	regulation of neurogenesis	41/997	485/28928	0.0845361	2.45282	6.09608	1.48871e-07	2.8436e-06	1.6719e-06	Tnfrsf12a/Nrg1/Il6/Sema7a/Tnfrsf1b/Baiap2/Myc/Epha4/Lig4/Epha7/Hif1a/Fgf2/Cysltr1/Ntf3/Cx3cr1/Vim/Id4/Rb1/Map3k13/Gfap/Egr2/Myb/Flt1/Rapgef2/Ptprd/Ccl11/Il1b/Il34/Ctdsp1/Ccr5/Sema6d/Yap1/Bhlhe40/Tspo/Ndel1/Slc7a5/Bcl11a/Lrp8/Lif/Id1/Ifrd1	41
BP	GO:0035924	cellular response to vascular endothelial growth factor stimulus	13/997	62/28928	0.209677	6.0838	7.57089	1.55445e-07	2.95886e-06	1.73967e-06	Sphk1/Hspb1/Spry2/Nr4a1/Pgf/Sema6a/Anxa1/Flt1/Adamts3/Map2k3/Adgrg1/Ptp4a3/Myo1c	13
BP	GO:0001660	fever generation	7/997	14/28928	0.5	14.5075	9.55084	1.57042e-07	2.9789e-06	1.75145e-06	Il1rn/Ptges/Ptgs2/Il1a/Il1b/Ccr5/Ednrb	7
BP	GO:0046889	positive regulation of lipid biosynthetic process	18/997	120/28928	0.15	4.35226	6.95228	1.60294e-07	3.02976e-06	1.78135e-06	Rdh10/Dab2/Ccn1/Anxa1/Ptgs2/Il1a/Adgrf5/Avpr1a/Il1b/Capn2/Ogt/Crebl2/Por/Ppara/Sec14l2/Mfsd2a/Slc27a1/Dgat2	18
BP	GO:1903038	negative regulation of leukocyte cell-cell adhesion	21/997	160/28928	0.13125	3.80822	6.72966	1.61018e-07	3.02976e-06	1.78135e-06	Lilrb4b/Lilrb4a/Hspb1/Ctla4/Il4ra/Havcr2/Cd44/Adam8/Nrarp/Runx1/Sdc4/Anxa1/Cd80/Il20rb/Cd86/Lrrc32/Cebpb/Cblb/Pf4/Ppara/Zc3h12a	21
BP	GO:0042832	defense response to protozoan	11/997	43/28928	0.255814	7.42245	7.9626	1.61381e-07	3.02976e-06	1.78135e-06	Il4ra/Il6/Il10/Irf4/Batf2/Gbp2b/Pf4/Gbp8/Slc11a1/Gbp2/Bcl3	11
BP	GO:0002643	regulation of tolerance induction	8/997	20/28928	0.4	11.606	8.96426	1.68627e-07	3.15499e-06	1.85498e-06	Lilrb4b/Lilrb4a/Havcr2/Irak3/Runx1/Cd86/Cblb/Tgfbr2	8
BP	GO:0048511	rhythmic process	34/997	364/28928	0.0934066	2.7102	6.20359	1.70726e-07	3.18341e-06	1.87169e-06	Adamts1/Tnfaip6/Sik1/Il6/Ada/Klf10/Csnk1e/Ereg/Egr1/Id3/Schip1/Runx1/Prkcg/Axl/Id4/Pln/Per1/Dpyd/Ogt/Klf9/Nos2/Rorc/Agrn/Tph1/Has1/Bhlhe40/Ppara/Nudt12/Cry2/Crem/Nfkb2/Sin3a/Prkdc/Id1	34
BP	GO:0042063	gliogenesis	37/997	417/28928	0.088729	2.57448	6.11863	1.81523e-07	3.37326e-06	1.98332e-06	S100a8/Areg/Ccl2/Nrg1/Il6/Ccl3/Abl2/S100a9/Tnfrsf1b/Myc/Epha4/Csf1/Pfkfb3/Fgf2/Abcc1/Cysltr1/Ntf3/Cx3cr1/Vim/Id4/Rb1/Gfap/Egr2/Myb/Sox6/Flt1/Il1b/Il34/Ndrg1/Adgrg1/Tppp/C5ar1/Tspo/Slc7a5/Lrp8/Lif/Sox9	37
BP	GO:0052547	regulation of peptidase activity	36/997	400/28928	0.09	2.61135	6.13114	1.87396e-07	3.47063e-06	2.04057e-06	Thbs1/S100a8/Bcl2l11/Ifi207/Tnfsf10/S100a9/Cd44/Plaur/Myc/Ccn1/Epha4/Hspa1b/Nr4a1/Epha7/Serpina3n/Timp3/F3/Naip6/Serpina3f/Ptgs2/F2r/Cryab/Timp1/Cstb/Acer2/Pmaip1/Acvr1c/Serpina3m/Ifi213/Serpine1/Bcl2a1d/Clec7a/Ecm1/Pi15/Serpina3c/Stfa2l1	36
BP	GO:0090025	regulation of monocyte chemotaxis	10/997	35/28928	0.285714	8.29001	8.15309	1.8941e-07	3.49005e-06	2.05199e-06	Ccl2/Ccr1/Ccn3/S100a14/Ninj1/Cx3cr1/Dusp1/Serpine1/Cxcl10/Pla2g7	10
BP	GO:0072577	endothelial cell apoptotic process	13/997	63/28928	0.206349	5.98723	7.48687	1.89718e-07	3.49005e-06	2.05199e-06	Thbs1/Abl2/Icam1/Il10/Cdh5/Rgcc/Ptpn1/Cd160/Tnfaip3/Tnip2/Serpine1/Angptl4/Id1	13
BP	GO:2000116	regulation of cysteine-type endopeptidase activity	24/997	205/28928	0.117073	3.39688	6.50676	1.93074e-07	3.53991e-06	2.0813e-06	Thbs1/S100a8/Bcl2l11/Ifi207/Tnfsf10/S100a9/Cd44/Plaur/Myc/Ccn1/Hspa1b/Nr4a1/Epha7/F3/Naip6/Ptgs2/F2r/Cryab/Acer2/Pmaip1/Acvr1c/Ifi213/Bcl2a1d/Clec7a	24
BP	GO:0140895	cell surface toll-like receptor signaling pathway	14/997	74/28928	0.189189	5.48933	7.30551	2.02633e-07	3.70277e-06	2.17706e-06	Nfkbia/Cd14/S100a14/Ninj1/Mfhas1/Sqstm1/Tril/Rab7b/Znrf1/Tnfaip3/Acod1/Tnip2/Tirap/Traf6	14
BP	GO:0045638	negative regulation of myeloid cell differentiation	16/997	97/28928	0.164948	4.78599	7.05653	2.03798e-07	3.7117e-06	2.18231e-06	Tnfaip6/Lilrb4b/Lilrb4a/Ccl3/Nfkbia/Trib1/Myc/Tnfrsf11b/Runx1/Itpkb/Gpr171/Myb/Tjp2/Pf4/Meis2/Meis1	16
BP	GO:0009895	negative regulation of catabolic process	34/997	367/28928	0.0926431	2.68804	6.14873	2.07267e-07	3.76237e-06	2.2121e-06	Hmox1/Nrg1/Ier3/Hcar2/Il10/Irak3/Timp3/Prkcg/Ddit4/Axin2/Mgat3/Vps13c/Gdnf/Arid5a/Il1b/Ogt/Banp/Nos2/Timp1/Tnfaip3/Cidec/A1cf/Zkscan3/Ppara/Tspo/Slc11a1/Cirbp/Slc7a5/Mfsd2a/Qsox1/Tirap/Gata4/Cbfa2t3/Vip	34
BP	GO:0009266	response to temperature stimulus	22/997	177/28928	0.124294	3.60639	6.57136	2.17315e-07	3.91881e-06	2.30408e-06	Hmox1/Hspb1/Nrg1/Hspa1b/Hspa1a/Il1r1/Trpv3/Rnf170/Ptgs2/Calca/Il1a/Gclc/Chordc1/Cryab/Bag3/Cirbp/Zfp976/Hspa2/Adrb2/Tac1/Slc27a1/Osm	22
BP	GO:0043281	regulation of cysteine-type endopeptidase activity involved in apoptotic process	22/997	177/28928	0.124294	3.60639	6.57136	2.17315e-07	3.91881e-06	2.30408e-06	Thbs1/S100a8/Bcl2l11/Tnfsf10/S100a9/Cd44/Plaur/Myc/Ccn1/Hspa1b/Nr4a1/Epha7/F3/Naip6/Ptgs2/F2r/Cryab/Acer2/Pmaip1/Acvr1c/Bcl2a1d/Clec7a	22
BP	GO:0051345	positive regulation of hydrolase activity	34/997	368/28928	0.0923913	2.68074	6.13057	2.20986e-07	3.97195e-06	2.33532e-06	S100a8/Bcl2l11/Ifi207/Tnfsf10/S100a9/Rgs16/Myc/Ccn1/Epha4/Ripk3/Epha2/Snx13/F3/Ntf3/Bcr/F2r/Rgs1/Rapgef2/Ccl11/Dock8/Agrn/Snx18/Acer2/Plek/Pmaip1/Acvr1c/Ifi213/Ndel1/Rasgrp1/Clec7a/Chn2/Chp2/Mex3b/Fermt2	34
BP	GO:0070373	negative regulation of ERK1 and ERK2 cascade	15/997	86/28928	0.174419	5.06076	7.12525	2.29322e-07	4.1083e-06	2.41549e-06	Errfi1/Dab2/Spry2/Epha4/Dusp4/Sema6a/Spry4/Spry3/Ptpn1/Dusp1/Ptprr/Lmo3/Spry1/Spred1/Lif	15
BP	GO:0006469	negative regulation of protein kinase activity	22/997	178/28928	0.123596	3.58613	6.53879	2.40019e-07	4.28594e-06	2.51993e-06	Lilrb4b/Lilrb4a/Hspb1/Errfi1/Trib1/Gadd45g/Spry2/Irak3/Gadd45b/Spry4/Rb1/Ptpn1/Gprc5a/Chordc1/Dusp1/Il1b/Shb/Tnfaip3/Spry1/Spred1/Nr2f2/Gadd45a	22
BP	GO:0045598	regulation of fat cell differentiation	20/997	151/28928	0.13245	3.84305	6.61769	2.71692e-07	4.83576e-06	2.8432e-06	Jdp2/Medag/Sh3pxd2b/Mex3c/Axin2/Id4/Ptgs2/Atat1/Lmo3/Cebpb/Crebl2/Rorc/Tph1/Yap1/Zbtb16/Pim1/Runx1t1/Zc3h12a/Napepld/Fermt2	20
BP	GO:0003012	muscle system process	39/997	460/28928	0.0847826	2.45997	5.96349	2.76886e-07	4.91227e-06	2.88818e-06	Sphk1/Nr4a3/Errfi1/Kcne4/Stc1/Ada/Tnfrsf1b/Nr4a1/Gucy1a1/Kcne3/Ptgs1/Tbx3/Ptgs2/Pln/Calca/Asb2/Ece1/Gdnf/F2r/Flt1/Tacr1/Lmna/Map2k3/Rgs4/Lmcd1/Ptafr/Agrn/Edn1/Bdkrb2/Hcn4/Ppara/Oga/Ednrb/Camta2/Meis1/Adrb2/Zc3h12a/Scn3b/Gata4	39
BP	GO:0002517	T cell tolerance induction	7/997	15/28928	0.466667	13.5404	9.17836	2.85662e-07	5.05161e-06	2.97011e-06	Lilrb4b/Lilrb4a/Runx1/Cd86/Icos/Cblb/Tgfbr2	7
BP	GO:0071559	response to transforming growth factor beta	29/997	288/28928	0.100694	2.92165	6.19214	2.86672e-07	5.05316e-06	2.97102e-06	Thbs1/Ccl2/Dab2/Gcnt2/Spry2/Zyx/Runx1/Cx3cr1/Cdh5/Fndc4/Tgfbr3/Eng/Gdnf/Sox6/Pmepa1/Ogt/Lrrc32/Edn1/Spry1/Spred1/Tgfbr2/Acvr1c/Serpine1/Ppara/Tnrc6c/Sox9/Lox/Sin3a/Fermt2	29
BP	GO:0090257	regulation of muscle system process	28/997	272/28928	0.102941	2.98684	6.22008	2.91138e-07	5.11545e-06	3.00764e-06	Sphk1/Nr4a3/Errfi1/Stc1/Ada/Tnfrsf1b/Nr4a1/Gucy1a1/Ptgs1/Ptgs2/Pln/Calca/Ece1/F2r/Flt1/Tacr1/Lmna/Rgs4/Lmcd1/Ptafr/Agrn/Edn1/Hcn4/Ppara/Oga/Adrb2/Zc3h12a/Gata4	28
BP	GO:0002246	wound healing involved in inflammatory response	6/997	10/28928	0.6	17.409	9.80516	3.07909e-07	5.39239e-06	3.17047e-06	Hmox1/Cd44/Hif1a/Il1a/F2r/Timp1	6
BP	GO:0019722	calcium-mediated signaling	26/997	241/28928	0.107884	3.13025	6.27413	3.08867e-07	5.39239e-06	3.17047e-06	Sphk1/Nrg1/Ccl3/Ccr1/Ada/Fhl2/Rcan1/Ccr8/Cx3cr1/Ramp3/Pln/Ackr3/Nr5a2/Ccrl2/Ppp3cc/Avpr1a/Xcr1/Bhlha15/Lmcd1/Edn1/Cxcr2/Ccr5/Itpr2/Ednrb/Clec7a/Chp2	26
BP	GO:0010469	regulation of signaling receptor activity	17/997	113/28928	0.150442	4.3651	6.77148	3.3708e-07	5.86627e-06	3.44909e-06	Lilrb4b/Lilrb4a/Ccl2/Errfi1/Il10/Arc/Hif1a/Ramp3/Gprc5a/Edn1/Serpine1/Ppara/Phlda2/Plau/Lrp8/Adrb2/Ly6m	17
BP	GO:0002062	chondrocyte differentiation	18/997	126/28928	0.142857	4.14501	6.68423	3.39798e-07	5.89484e-06	3.46589e-06	Fgfr1/Mex3c/Hif1a/Ccn3/Runx1/Axin2/Rb1/Arid5a/Sox6/Tgfbr2/Por/Zbtb16/Maf/Cytl1/Sox9/Osr1/Ecm1/Osr2	18
BP	GO:0051056	regulation of small GTPase mediated signal transduction	26/997	244/28928	0.106557	3.09177	6.19933	3.93211e-07	6.79995e-06	3.99805e-06	Nrg1/Abl2/Sipa1l2/Gpr4/Spry2/Csf1/Dennd4a/Cyth3/Prag1/Spry4/Spry3/Itpkb/Rabgef1/Bcr/F2r/Stard13/Arfgef3/Ogt/Adgrg1/Dock8/Eps8l3/Agrn/Spry1/Kctd10/Rasgrp1/Kbtbd7	26
BP	GO:0048008	platelet-derived growth factor receptor signaling pathway	13/997	67/28928	0.19403	5.62978	7.16801	4.04803e-07	6.9784e-06	4.10297e-06	Csrnp1/Nr4a3/Plat/Abl2/Schip1/F3/Tiparp/Bcr/Ptpn1/Cblb/Zfand5/Pdgfc/Lox	13
BP	GO:0043406	positive regulation of MAP kinase activity	16/997	102/28928	0.156863	4.55138	6.7883	4.14967e-07	7.13118e-06	4.1928e-06	Thbs1/Epha4/Fgfr1/Fgf2/Mst1r/Ntf3/Map3k13/Ptpn1/Flt1/Il1b/Il34/Edn1/Fgd4/Rasgrp1/Tirap/Traf6	16
BP	GO:0002292	T cell differentiation involved in immune response	15/997	90/28928	0.166667	4.83584	6.88581	4.24027e-07	7.26411e-06	4.27095e-06	Il4ra/Il6/Gadd45g/Anxa1/Myb/Irf4/Sema4a/Clec4d/Shb/Rorc/Pf4/Clec4e/Fcer1g/Zc3h12a/Bcl3	15
BP	GO:0032602	chemokine production	18/997	128/28928	0.140625	4.08024	6.59856	4.31851e-07	7.3751e-06	4.33621e-06	Lilrb4b/Lilrb4a/Il4ra/Cxcl5/Il6/Havcr2/Egr1/Ccn1/Ackr1/Epha2/Tlr3/Trem1/Il1b/Mavs/Clec7a/Tirap/Il1rl1/Il17ra	18
BP	GO:0010596	negative regulation of endothelial cell migration	12/997	57/28928	0.210526	6.10843	7.29374	4.44918e-07	7.55121e-06	4.43976e-06	Thbs1/Stc1/Adamts9/Fgf2/Robo4/Rgcc/Stard13/Spred1/Nr2f2/Gadd45a/Meox2/Sp100	12
BP	GO:0060251	regulation of glial cell proliferation	12/997	57/28928	0.210526	6.10843	7.29374	4.44918e-07	7.55121e-06	4.43976e-06	Nrg1/Il6/Myc/Cysltr1/Vim/Rb1/Gfap/Myb/Flt1/Il1b/Tspo/Slc7a5	12
BP	GO:0048638	regulation of developmental growth	35/997	397/28928	0.0881612	2.558	5.90555	4.50841e-07	7.62812e-06	4.48497e-06	Tnfrsf12a/Nrg1/Bcl2l11/Sema7a/Ptch1/Csf1/Fgfr1/Sh3pxd2b/Epha7/Fgf2/Map3k13/Tgfbr3/Rgs4/Agrn/Edn1/Bbs4/Gja1/Ccr5/Sema6d/Tgfbr2/Yap1/Serpine1/Ppara/Slc23a2/Ndel1/Stc2/Pim1/Mfsd2a/Bcl11a/Adrb2/Gata4/Sin3a/Prkdc/Ifrd1/Mbd5	35
BP	GO:0006979	response to oxidative stress	37/997	434/28928	0.0852535	2.47363	5.84404	4.86528e-07	8.2066e-06	4.8251e-06	Areg/Sphk1/Hmox1/Hspb1/Nr4a3/Il6/Lcn2/Rcan1/Fosl1/Ripk3/Hif1a/Ptgs1/Abcc1/Anxa1/Plk3/Axl/Ptgs2/Il18rap/Ncoa7/Mgat3/Il1a/Nr4a2/Gclc/Tacr1/Pld2/Capn2/Cryab/Mmp3/Edn1/Tnfaip3/Slc23a2/Stc2/Prdx6/Slc7a11/Mctp1/Zc3h12a/Sin3a	37
BP	GO:0002220	innate immune response activating cell surface receptor signaling pathway	15/997	91/28928	0.164835	4.7827	6.82816	4.9169e-07	8.24295e-06	4.84647e-06	Nfkbia/Cd14/S100a14/Ninj1/Mfhas1/Sqstm1/Tril/Rab7b/Znrf1/Tnfaip3/Acod1/Tnip2/Clec7a/Tirap/Traf6	15
BP	GO:0002720	positive regulation of cytokine production involved in immune response	15/997	91/28928	0.164835	4.7827	6.82816	4.9169e-07	8.24295e-06	4.84647e-06	Nr4a3/Il6/Sema7a/Il1r1/Tlr3/Arid5a/Il1b/Cd160/Inava/Mavs/Trim6/Clec7a/Tirap/Fcer1g/Traf6	15
BP	GO:0002822	regulation of adaptive immune response based on somatic recombination of immune receptors built from immunoglobulin superfamily domains	26/997	247/28928	0.105263	3.05422	6.12567	4.98406e-07	8.33007e-06	4.89769e-06	Lilrb4b/Lilrb4a/Il4ra/Il6/Ada/Tnfrsf1b/Havcr2/Ripk3/Pvr/Il1r1/Anxa1/Cd80/Arid5a/Il20rb/Fcgr3/Il1b/Aplf/Tnfaip3/Pf4/Slc11a1/Fcgr2b/Clec7a/Fcer1g/Zc3h12a/Il1rl1/Traf6	26
BP	GO:0046683	response to organophosphorus	19/997	143/28928	0.132867	3.85515	6.4665	5.10976e-07	8.4884e-06	4.99078e-06	Fosb/Areg/Ccl2/Errfi1/Stc1/Fosl1/Thbd/Inhbb/Ptgs2/Per1/Rapgef2/Il1b/Ssh1/Ptafr/Itpr2/Hcn4/Nt5e/Crem/Hmga1	19
BP	GO:0050868	negative regulation of T cell activation	19/997	143/28928	0.132867	3.85515	6.4665	5.10976e-07	8.4884e-06	4.99078e-06	Lilrb4b/Lilrb4a/Hspb1/Ctla4/Il4ra/Havcr2/Cd44/Nrarp/Runx1/Sdc4/Anxa1/Cd80/Il20rb/Cd86/Lrrc32/Cebpb/Cblb/Pf4/Zc3h12a	19
BP	GO:0043523	regulation of neuron apoptotic process	31/997	331/28928	0.0936556	2.71742	5.93727	5.58066e-07	9.24265e-06	5.43425e-06	Hmox1/Nr4a3/Il6/Ccl3/Bcl2l11/Lcn2/Egr1/Epha4/Il10/Lig4/Adam8/Epha7/Hif1a/Fgf2/Prkcg/Ntf3/Cx3cr1/Axl/Myb/Gdnf/F2r/Nr4a2/Gclc/Mt1/Il1b/Cebpb/Agrn/Ccr5/Pmaip1/C5ar1/Fcgr2b	31
BP	GO:0032642	regulation of chemokine production	17/997	117/28928	0.145299	4.21586	6.58517	5.60168e-07	9.24952e-06	5.43828e-06	Lilrb4b/Lilrb4a/Il4ra/Cxcl5/Il6/Havcr2/Egr1/Ccn1/Ackr1/Epha2/Tlr3/Il1b/Mavs/Clec7a/Tirap/Il1rl1/Il17ra	17
BP	GO:0071560	cellular response to transforming growth factor beta stimulus	28/997	281/28928	0.0996441	2.89118	6.01869	5.65864e-07	9.31552e-06	5.47709e-06	Thbs1/Ccl2/Dab2/Gcnt2/Spry2/Zyx/Runx1/Cx3cr1/Cdh5/Tgfbr3/Eng/Gdnf/Sox6/Pmepa1/Ogt/Lrrc32/Edn1/Spry1/Spred1/Tgfbr2/Acvr1c/Serpine1/Ppara/Tnrc6c/Sox9/Lox/Sin3a/Fermt2	28
BP	GO:0045619	regulation of lymphocyte differentiation	25/997	233/28928	0.107296	3.1132	6.11888	5.74663e-07	9.43205e-06	5.5456e-06	Lilrb4b/Lilrb4a/Hspb1/Ctla4/Il4ra/Il6/Ada/Cd44/Il10/Adam8/Il1rl2/Ctla2a/Nrarp/Runx1/Anxa1/Itpkb/Axl/Shb/Rorc/Il15/Pf4/Tgfbr2/Rasgrp1/Zc3h12a/Prkdc	25
BP	GO:0033032	regulation of myeloid cell apoptotic process	10/997	39/28928	0.25641	7.43976	7.60311	5.78732e-07	9.47048e-06	5.5682e-06	Cd44/Hcar2/Anxa1/Itpkb/Cxcr2/Ccr5/Fcgr2b/Slc7a11/Fcer1g/St6gal1	10
BP	GO:0043123	positive regulation of canonical NF-kappaB signal transduction	22/997	188/28928	0.117021	3.39538	6.22538	6.21861e-07	1.01301e-05	5.95603e-06	Abl2/Tnfsf10/Trim30d/Irak3/Trim8/Cx3cr1/Tlr3/Trim12c/Il1a/F2r/Il1b/Clec4d/Edn1/Tnip2/Inava/Tlr8/Trim34b/Ednrb/Trim6/Clec7a/Tirap/Traf6	22
BP	GO:0051216	cartilage development	25/997	234/28928	0.106838	3.0999	6.0935	6.22738e-07	1.01301e-05	5.95603e-06	Thbs1/Errfi1/Stc1/Ccn1/Fgfr1/Mex3c/Hif1a/Ccn3/Fgf2/Runx1/Axin2/Rb1/Arid5a/Sox6/Edn1/Timp1/Tgfbr2/Por/Zbtb16/Maf/Cytl1/Sox9/Osr1/Ecm1/Osr2	25
BP	GO:0032946	positive regulation of mononuclear cell proliferation	20/997	159/28928	0.125786	3.64969	6.32976	6.30652e-07	1.02285e-05	6.01388e-06	Il6/Ada/Havcr2/Csf1/Slc7a1/Anxa1/Cd80/Il1a/Tacr1/Cd86/Il1b/Il15/Prlr/Tgfbr2/Icosl/Irs2/Tirap/Tac1/St6gal1/Traf6	20
BP	GO:0071774	response to fibroblast growth factor	17/997	118/28928	0.144068	4.18013	6.5399	6.33688e-07	1.02474e-05	6.025e-06	Thbs1/Ier2/Spry2/Cd44/Fgfr1/Nr4a1/Fgf2/Spry4/Spry3/Ptpn1/Gclc/Ndst1/Spry1/Flrt2/Fgfr4/Tnc/Fgf15	17
BP	GO:0031334	positive regulation of protein-containing complex assembly	24/997	219/28928	0.109589	3.17973	6.11747	6.55133e-07	1.05631e-05	6.21058e-06	Nrg1/Csf3/Bcl2l11/Icam1/Baiap2/Hspa1b/Hspa1a/Cdh5/Atat1/Ccl11/Cdc42ep3/Mmp3/Tppp/Plek/Cracd/Cdc42ep2/Mavs/Mpp7/Gbp2/Clec7a/Tirap/Trim65/Fermt2/Myo1c	24
BP	GO:0048608	reproductive structure development	34/997	386/28928	0.0880829	2.55573	5.81355	6.69277e-07	1.07595e-05	6.32606e-06	Adamts1/Tnfaip6/Rdh10/Errfi1/Bcl2l11/Tnfsf10/Icam1/Ptch1/Cd44/Plaur/Ereg/Adam4/Schip1/Inhbb/Runx1/Gm4787/Tbx3/Tlr3/Axl/Id4/Tiparp/Il1a/Adgrg1/Cebpb/Prlr/Gja1/Ctsl/Nr2f2/Serpine1/Tnc/Sox9/Osr1/Gata4/Mertk	34
BP	GO:0022604	regulation of cell morphogenesis	28/997	284/28928	0.0985915	2.86064	5.95333	7.01152e-07	1.12389e-05	6.60797e-06	Il6/Ccl3/Icam1/Baiap2/Cd44/Epha4/Arc/Prag1/Pakap/Rhoj/Anxa1/Spry3/Ccl7/Map3k13/Pdpn/Sema4a/Ptprd/Ccl11/Cdc42ep3/Fmnl2/Fgd4/Cdc42ep2/Slc23a2/Mfsd2a/Bcl11a/Lrp8/Prkdc/Fermt2	28
BP	GO:0046888	negative regulation of hormone secretion	16/997	106/28928	0.150943	4.37963	6.58591	7.09367e-07	1.13375e-05	6.66589e-06	Nrg1/Il6/Klf7/Ccn3/Inhbb/Pim3/Il1b/Edn1/Gja1/Acvr1c/Tspo/Cry2/Lif/Igfbp3/Osm/Midn	16
BP	GO:0043087	regulation of GTPase activity	24/997	220/28928	0.109091	3.16528	6.09087	7.11761e-07	1.13427e-05	6.66895e-06	Spry2/Rgs16/Epha4/Epha2/Sh3bp4/Snx13/Ntf3/Bcr/F2r/Rgs1/Rapgef2/Pot1b/Ccl11/Dock8/Agrn/Bbs4/Snx18/Spry1/Cblb/Ndel1/Rasgrp1/Chn2/Mex3b/Fermt2	24
BP	GO:0045834	positive regulation of lipid metabolic process	21/997	175/28928	0.12	3.48181	6.22159	7.33972e-07	1.16627e-05	6.85713e-06	Rdh10/Dab2/Ccn1/Anxa1/Ptgs2/Il1a/Adgrf5/Avpr1a/Il1b/Capn2/Ogt/Crebl2/Cpt1a/Por/Ppara/Sec14l2/Angptl4/Irs2/Mfsd2a/Slc27a1/Dgat2	21
BP	GO:0045732	positive regulation of protein catabolic process	23/997	205/28928	0.112195	3.25535	6.12254	7.36965e-07	1.16764e-05	6.86518e-06	Trib1/Dab2/Ier3/Tnfrsf1b/Csnk1e/Hspa1b/Hspa1a/Adam8/Axin2/Plk3/Tiparp/Plk2/Gclc/Il1b/Cdc20/Bag2/Tnfaip3/Gja1/Cblb/Sox9/Cbfa2t3/Herpud1/Vip	23
BP	GO:0045123	cellular extravasation	14/997	82/28928	0.170732	4.95379	6.77382	7.56539e-07	1.1952e-05	7.02722e-06	Selp/Ccl2/Icam1/Sele/Ripk3/Adam8/Il1r1/Cx3cr1/Bcr/Trem1/Lyve1/Plvap/Ptafr/Gcnt1	14
BP	GO:0045926	negative regulation of growth	26/997	253/28928	0.102767	2.98178	5.98165	7.90684e-07	1.24555e-05	7.32327e-06	Dab2/Mt2/Ptch1/Hspa1b/Hspa1a/Epha7/Hif1a/Ccn3/Sh3bp4/Ip6k2/Bdkrb1/Rb1/Mt1/Rgs4/Cryab/Gja1/Ccr5/Sema6d/Tgfbr2/Ppara/Cirbp/Stc2/Bcl11a/Adrb2/Ifrd1/Cda	26
BP	GO:0042886	amide transport	35/997	407/28928	0.0859951	2.49515	5.73926	8.0625e-07	1.26364e-05	7.42963e-06	S100a8/Il6/Stxbp4/S100a9/Ildr1/Klf7/Il1rn/Hif1a/Ccn3/Glul/Inhbb/Aqp7/Abcc1/Anxa1/Lrrc8a/Rfx3/Pim3/Il1b/Nos2/Edn1/Abcg2/Gja1/Cpt1a/Slc15a3/Acvr1c/Acsl4/Oga/Irs2/Slc7a11/Lif/Slc27a1/Fam3b/Midn/Vip/Hmga1	35
BP	GO:0010508	positive regulation of autophagy	21/997	176/28928	0.119318	3.46202	6.18971	8.06777e-07	1.26364e-05	7.42963e-06	Hmox1/Rnf152/Bcl2l11/Trim30d/Hif1a/Trim8/Sh3bp4/Plk3/Plk2/Trim12c/Sqstm1/Scoc/Sting1/Snx18/Bag3/Hspb8/Trim34b/Trim6/Adrb2/Trim65/Zc3h12a	21
BP	GO:0031650	regulation of heat generation	7/997	17/28928	0.411765	11.9474	8.53019	8.12592e-07	1.26913e-05	7.46186e-06	Ptges/Ptgs2/Il1b/Ccr5/Ednrb/Arrdc3/Slc27a1	7
BP	GO:0030100	regulation of endocytosis	32/997	355/28928	0.0901408	2.61544	5.78606	8.57125e-07	1.33488e-05	7.84844e-06	Sphk1/Ccl2/Nrg1/Dab2/Cd14/Sele/Arc/Prkcg/Ntf3/Tamalin/Axl/Rabgef1/Plk2/Bcr/Fcgr3/Ptpn1/Plscr1/Ppp3cc/Pot1b/Pld2/Il15/Il2rb/Ldlrap1/Cblb/Serpine1/Slc11a1/Fcgr2b/Clec7a/Mex3b/Mctp1/Fcer1g/Mertk	32
BP	GO:0030278	regulation of ossification	19/997	148/28928	0.128378	3.7249	6.27903	8.72714e-07	1.3553e-05	7.96854e-06	Ccr1/Ccn1/Csf1/Hif1a/Ccn3/Calca/Egr2/Tacr1/Tph1/Gja1/S1pr1/Zbtb16/Tmem119/Adrb2/Sox9/Osr1/Ecm1/Tac1/Osr2	19
BP	GO:0061458	reproductive system development	34/997	391/28928	0.0869565	2.52305	5.72867	8.97263e-07	1.38949e-05	8.16955e-06	Adamts1/Tnfaip6/Rdh10/Errfi1/Bcl2l11/Tnfsf10/Icam1/Ptch1/Cd44/Plaur/Ereg/Adam4/Schip1/Inhbb/Runx1/Gm4787/Tbx3/Tlr3/Axl/Id4/Tiparp/Il1a/Adgrg1/Cebpb/Prlr/Gja1/Ctsl/Nr2f2/Serpine1/Tnc/Sox9/Osr1/Gata4/Mertk	34
BP	GO:0002532	production of molecular mediator involved in inflammatory response	16/997	108/28928	0.148148	4.29853	6.48845	9.1817e-07	1.41786e-05	8.33636e-06	Lilrb4b/Lilrb4a/Il4ra/Il6/S100a9/Il1r2/Hif1a/Tlr3/Per1/Nos2/Serpine1/Ppara/Clec7a/Fcer1g/Zc3h12a/Il17ra	16
BP	GO:2000377	regulation of reactive oxygen species metabolic process	20/997	163/28928	0.122699	3.56013	6.19269	9.40001e-07	1.4475e-05	8.5106e-06	Thbs1/Cxcl1/Ier3/Lcn2/Ripk3/Hif1a/Bcr/Slc5a3/Ogt/Cryab/Mmp3/Acod1/Tgfbr2/Ppara/Tspo/Plau/Gadd45a/Ptgr1/Clec7a/Zc3h12a	20
BP	GO:0070542	response to fatty acid	13/997	72/28928	0.180556	5.23883	6.80378	9.64882e-07	1.47014e-05	8.64372e-06	Hmox1/Ccl2/Ildr1/Id3/Scd2/Ptgs2/Pdk4/Ptafr/Edn1/Cpt1a/Sox9/Zc3h12a/Dgat2	13
BP	GO:0001961	positive regulation of cytokine-mediated signaling pathway	12/997	61/28928	0.196721	5.70788	6.95417	9.65432e-07	1.47014e-05	8.64372e-06	Hspa1b/Csf1/Hif1a/Il1r1/Axl/Edn1/Sting1/Mmp8/Parp14/Mavs/Trim6/Mmp12	12
BP	GO:0038066	p38MAPK cascade	12/997	61/28928	0.196721	5.70788	6.95417	9.65432e-07	1.47014e-05	8.64372e-06	Sphk1/Gadd45g/Gadd45b/Per1/Mfhas1/Dusp1/Rell1/Map2k3/Map3k6/Il1b/Gadd45a/Zc3h12a	12
BP	GO:0043536	positive regulation of blood vessel endothelial cell migration	12/997	61/28928	0.196721	5.70788	6.95417	9.65432e-07	1.47014e-05	8.64372e-06	Thbs1/Hmox1/Hspb1/Fgfr1/Hif1a/Fgf2/Rhoj/Anxa1/Ptgs2/Plk2/Tgfbr3/Map2k3	12
BP	GO:0072089	stem cell proliferation	19/997	149/28928	0.127517	3.69991	6.24252	9.68406e-07	1.47058e-05	8.64633e-06	Dab2/Cxcl1/Ptch1/Lig4/Fgfr1/Fgf2/Tbx3/Axin2/Taf4b/Ovol1/Shb/Gja1/Sfn/Tgfbr2/Yap1/Pim1/Sox9/Osr2/Fermt2	19
BP	GO:0009408	response to heat	15/997	96/28928	0.15625	4.5336	6.55197	9.99262e-07	1.51325e-05	8.89718e-06	Hmox1/Hspb1/Hspa1b/Hspa1a/Il1r1/Ptgs2/Calca/Il1a/Gclc/Chordc1/Cryab/Bag3/Zfp976/Hspa2/Osm	15
BP	GO:0007566	embryo implantation	14/997	84/28928	0.166667	4.83584	6.65164	1.02446e-06	1.54714e-05	9.09643e-06	Errfi1/Stc1/Ptgs2/Klf9/Aplf/Timp1/Gja1/Acod1/Acvr1c/A1cf/Tead4/Stc2/Lif/Mmp12	14
BP	GO:0045667	regulation of osteoblast differentiation	20/997	164/28928	0.121951	3.53842	6.15909	1.0364e-06	1.55969e-05	9.17022e-06	Cebpd/Tnfaip6/Areg/Il6/Ptch1/Ccn1/Fgfr1/Id3/Fgf2/Axin2/Ifitm1/Lmna/Cebpb/Jund/Yap1/Tmem119/Sox9/Id1/Fermt2/Ifi204	20
BP	GO:0048265	response to pain	11/997	51/28928	0.215686	6.25815	7.10065	1.03846e-06	1.55969e-05	9.17022e-06	Thbs1/Runx1/Prkcg/Calca/Atat1/Tacr1/Capn2/Tspo/Ednrb/Tac1/Osm	11
BP	GO:0002699	positive regulation of immune effector process	30/997	324/28928	0.0925926	2.68658	5.76795	1.07357e-06	1.608e-05	9.45429e-06	Lilrb4a/Ccl2/Nr4a3/Il4ra/Il6/Sema7a/Cxcl1/Il10/Pvr/Il1r1/Anxa1/Tlr3/Il18rap/Gab2/Arid5a/Fcgr3/Cd86/Pld2/Il1b/Shb/Cd160/Ptafr/Inava/Mavs/Trim6/Rasgrp1/Clec7a/Tirap/Fcer1g/Traf6	30
BP	GO:0050672	negative regulation of lymphocyte proliferation	15/997	97/28928	0.154639	4.48686	6.49901	1.14477e-06	1.70999e-05	1.00539e-05	Lilrb4b/Lilrb4a/Ctla4/Havcr2/Cd44/Il10/Sdc4/Cd80/Il20rb/Cd86/Lrrc32/Cebpb/Cblb/Fcgr2b/Gal	15
BP	GO:0032868	response to insulin	29/997	308/28928	0.0941558	2.73194	5.77336	1.15078e-06	1.71428e-05	1.00792e-05	Ccl2/Errfi1/Stxbp4/Socs3/Tnfsf10/Egr1/Il10/Inhbb/Slc2a1/Rb1/Adm/Egr2/Vps13c/Ptpn1/Gclc/Il1b/Ogt/Pdk4/Gcnt1/Acvr1c/Ppara/Ndel1/Insig2/Irs2/Cry2/Slc27a1/Prkdc/Myo1c/Hmga1	29
BP	GO:1900015	regulation of cytokine production involved in inflammatory response	12/997	62/28928	0.193548	5.61582	6.87396	1.15983e-06	1.72308e-05	1.01309e-05	Lilrb4b/Lilrb4a/Il6/Il1r2/Hif1a/Tlr3/Per1/Nos2/Ppara/Clec7a/Zc3h12a/Il17ra	12
BP	GO:0030316	osteoclast differentiation	18/997	137/28928	0.131387	3.8122	6.23352	1.19585e-06	1.77179e-05	1.04173e-05	Tnfaip6/Lilrb4b/Lilrb4a/Ccl3/Sbno2/Ccr1/Klf10/Csf1/Adam8/Junb/Tnfrsf11b/Epha2/Ninj1/Gab2/Cebpb/Tjp2/Fcer1g/Traf6	18
BP	GO:0002544	chronic inflammatory response	8/997	25/28928	0.32	9.28481	7.82956	1.24177e-06	1.83487e-05	1.07882e-05	Ccl2/S100a9/Il10/Cx3cr1/Ccl11/Cebpb/Tnfaip3/Gja1	8
BP	GO:0051962	positive regulation of nervous system development	34/997	397/28928	0.0856423	2.48492	5.62852	1.26541e-06	1.86479e-05	1.09641e-05	Tnfrsf12a/Nrg1/Il6/Sema7a/Tnfrsf1b/Baiap2/Myc/Epha4/Lig4/Hif1a/Fgf2/Cysltr1/Ntf3/Cx3cr1/Vim/Id4/Map3k13/Gfap/Egr2/Myb/Flt1/Sema4a/Ptprd/Il1b/Il34/Slitrk6/Agrn/Flrt2/Tspo/Ndel1/Slc7a5/Bcl11a/Lrp8/Lif	34
BP	GO:0051092	positive regulation of NF-kappaB transcription factor activity	17/997	124/28928	0.137097	3.97787	6.27836	1.29045e-06	1.89658e-05	1.1151e-05	Sphk1/Trim30d/Irak3/Hspa1b/Ripk3/Trim8/Tlr3/Il18rap/Map3k13/Tgfbr3/Trim12c/Il1b/Rab7b/Clec7a/Tirap/Nts/Traf6	17
BP	GO:0048864	stem cell development	15/997	98/28928	0.153061	4.44108	6.44676	1.30904e-06	1.91875e-05	1.12814e-05	Rdh10/Sema7a/Hif1a/Sema6a/Fgf2/Sema6b/Gdnf/Kbtbd8/Sema4a/Sema4c/Edn1/Sema6d/Ednrb/Sox9/Fgf15	15
BP	GO:0014812	muscle cell migration	18/997	138/28928	0.130435	3.78457	6.19488	1.33152e-06	1.94651e-05	1.14446e-05	Adamts1/Nr4a3/Plat/Trib1/Egr1/Myc/Ccn3/F3/Anxa1/Ptpn1/Tacr1/Ssh1/Sema6d/Tcp11l2/Serpine1/Plau/Igfbp3/Abhd2	18
BP	GO:0060425	lung morphogenesis	13/997	74/28928	0.175676	5.09724	6.66745	1.33635e-06	1.94837e-05	1.14555e-05	Rdh10/Spry2/Foxf1/Stk40/Spry1/Tgfbr2/Yap1/Tnc/Lif/Sox9/Gata4/Id1/Hmga1	13
BP	GO:0043409	negative regulation of MAPK cascade	21/997	182/28928	0.115385	3.34789	6.00317	1.40081e-06	2.03694e-05	1.19762e-05	Lilrb4b/Lilrb4a/Errfi1/Dab2/Dusp5/Spry2/Epha4/Irak3/Dusp4/Sema6a/Spry4/Spry3/Per1/Ptpn1/Dusp1/Ptprr/Lmo3/Il1b/Spry1/Spred1/Lif	21
BP	GO:1903532	positive regulation of secretion by cell	34/997	399/28928	0.085213	2.47246	5.59555	1.41639e-06	2.05414e-05	1.20774e-05	Sphk1/Il4ra/Dab2/Ildr1/Hcar2/Fgfr1/Hif1a/Glul/Inhbb/Runx1/Sdc4/Ptges/Rgcc/Gab2/Lrrc8a/Il1a/Myb/Tacr1/Avpr1a/Pld2/Il1b/Cd160/Ptafr/Edn1/Gja1/A1cf/Acsl4/Fgfr4/Oga/Irs2/Lif/Gal/Fcer1g/Tac1	34
BP	GO:0003002	regionalization	37/997	454/28928	0.0814978	2.36466	5.53713	1.43433e-06	2.07467e-05	1.21981e-05	Pgap1/Ets2/Ptch1/Arc/Fgfr1/Hif1a/Nrarp/Fgf2/Foxf1/Tbx3/Axin2/Ifitm1/Scmh1/Asb2/Egr2/Eng/Gdnf/Rfx3/Hoxb6/Tasor/Adgrg1/Edn1/Gja1/Mdfi/Hoxc6/Spry1/Tgfbr2/Bhlhe40/Nr2f2/Zbtb16/Fgfr4/Meox2/Hoxb9/Osr1/Hoxc8/Gata4/Prkdc	37
BP	GO:1902106	negative regulation of leukocyte differentiation	17/997	125/28928	0.136	3.94605	6.23637	1.44622e-06	2.08637e-05	1.22668e-05	Tnfaip6/Lilrb4b/Lilrb4a/Hspb1/Ctla4/Il4ra/Ccl3/Trib1/Cd44/Myc/Nrarp/Tnfrsf11b/Runx1/Anxa1/Tjp2/Pf4/Zc3h12a	17
BP	GO:0007200	phospholipase C-activating G protein-coupled receptor signaling pathway	18/997	139/28928	0.129496	3.75734	6.1566	1.481e-06	2.13093e-05	1.25289e-05	Abl2/Gpr4/Sele/Prkcg/Cx3cr1/Bdkrb1/Grpr/F2r/Adgrg1/Ptafr/Edn1/Cxcr2/Plek/C5ar1/S1pr1/Fpr1/Ednrb/Dgkb	18
BP	GO:0032945	negative regulation of mononuclear cell proliferation	15/997	99/28928	0.151515	4.39622	6.39521	1.49415e-06	2.14422e-05	1.2607e-05	Lilrb4b/Lilrb4a/Ctla4/Havcr2/Cd44/Il10/Sdc4/Cd80/Il20rb/Cd86/Lrrc32/Cebpb/Cblb/Fcgr2b/Gal	15
BP	GO:0045580	regulation of T cell differentiation	22/997	198/28928	0.111111	3.22389	5.93246	1.50228e-06	2.15026e-05	1.26425e-05	Lilrb4b/Lilrb4a/Hspb1/Ctla4/Il4ra/Il6/Ada/Cd44/Adam8/Il1rl2/Ctla2a/Nrarp/Runx1/Anxa1/Itpkb/Shb/Rorc/Il15/Pf4/Tgfbr2/Rasgrp1/Zc3h12a	22
BP	GO:0002064	epithelial cell development	26/997	262/28928	0.0992366	2.87936	5.77341	1.53309e-06	2.18864e-05	1.28682e-05	Stc1/Gpr4/Icam1/Clic4/Hif1a/Bcl11b/Epha2/Cdh5/Vim/Robo4/Il1a/Rfx3/Rapgef2/Flnb/Il1b/Bhlha15/Tjp2/Gja1/Sfn/Yap1/Vcl/S1pr3/Ednrb/Pof1b/Sox9/Id1	26
BP	GO:1900744	regulation of p38MAPK cascade	10/997	43/28928	0.232558	6.74768	7.12602	1.54017e-06	2.19304e-05	1.2894e-05	Sphk1/Gadd45g/Gadd45b/Per1/Mfhas1/Dusp1/Rell1/Il1b/Gadd45a/Zc3h12a	10
BP	GO:1903522	regulation of blood circulation	27/997	279/28928	0.0967742	2.80791	5.73297	1.57877e-06	2.23567e-05	1.31447e-05	Kcne4/Stc1/Ada/Icam1/Dusp5/Hif1a/Kcne3/Ptgs1/Cysltr1/Ptgs2/Pln/Adm/F2r/Ptpn1/Tacr1/Avpr1a/Rgs4/Agrn/Edn1/Gja1/Hcn4/Ednrb/Adrb2/Zc3h12a/Tac1/Scn3b/Gata4	27
BP	GO:0050890	cognition	34/997	401/28928	0.084788	2.46013	5.56277	1.58391e-06	2.23567e-05	1.31447e-05	Itga5/Nrg1/Abl2/Lcn2/Rcan1/Fosl1/Egr1/Fam107a/Arc/Il1rn/Hif1a/Ptgs1/Prkcg/Cx3cr1/Ptgs2/Rin1/Pln/Plk2/Grpr/Egr2/Mgat3/Nr4a2/Tacr1/Ccl11/Il1b/C5ar1/Meis2/Atp8a1/Slc7a11/Mfsd2a/Adrb2/Nts/Tac1/Vip	34
BP	GO:0014032	neural crest cell development	14/997	87/28928	0.16092	4.66909	6.47543	1.58642e-06	2.23567e-05	1.31447e-05	Rdh10/Sema7a/Hif1a/Sema6a/Sema6b/Gdnf/Kbtbd8/Sema4a/Sema4c/Edn1/Sema6d/Ednrb/Sox9/Fgf15	14
BP	GO:0070228	regulation of lymphocyte apoptotic process	14/997	87/28928	0.16092	4.66909	6.47543	1.58642e-06	2.23567e-05	1.31447e-05	Ada/Bcl2l11/Cd44/Myc/Il10/Ripk3/Adam8/Hif1a/Bcl11b/Dock8/Rorc/Bcl2a1a/Irs2/Bcl3	14
BP	GO:2000352	negative regulation of endothelial cell apoptotic process	9/997	34/28928	0.264706	7.68045	7.36373	1.59634e-06	2.24388e-05	1.31929e-05	Abl2/Icam1/Il10/Cdh5/Tnfaip3/Tnip2/Serpine1/Angptl4/Id1	9
BP	GO:0002761	regulation of myeloid leukocyte differentiation	19/997	154/28928	0.123377	3.57978	6.06455	1.60612e-06	2.25186e-05	1.32399e-05	Tnfaip6/Lilrb4b/Lilrb4a/Ccl3/Ccr1/Trib1/Klf10/Myc/Csf1/Adam8/Tnfrsf11b/Runx1/Ninj1/Rb1/Il34/Cebpb/Tjp2/Lif/Traf6	19
BP	GO:0001890	placenta development	22/997	199/28928	0.110553	3.20769	5.9042	1.63498e-06	2.28647e-05	1.34433e-05	Socs3/Stc1/Ada/Fosl1/Ccn1/Il10/Hif1a/Junb/Pgf/Ptgs2/Adm/Cebpb/Hsd17b2/Gja1/Mdfi/Ctsl/Nr2f2/Serpine1/Phlda2/Stc2/Lif/Gjb3	22
BP	GO:0050769	positive regulation of neurogenesis	30/997	332/28928	0.0903614	2.62184	5.6154	1.77733e-06	2.47293e-05	1.45397e-05	Tnfrsf12a/Nrg1/Il6/Sema7a/Tnfrsf1b/Baiap2/Myc/Epha4/Lig4/Hif1a/Fgf2/Cysltr1/Ntf3/Cx3cr1/Vim/Id4/Map3k13/Gfap/Egr2/Myb/Flt1/Ptprd/Il1b/Il34/Tspo/Ndel1/Slc7a5/Bcl11a/Lrp8/Lif	30
BP	GO:0071695	anatomical structure maturation	30/997	332/28928	0.0903614	2.62184	5.6154	1.77733e-06	2.47293e-05	1.45397e-05	Rnd1/Abl2/Ereg/Fgfr1/Hif1a/Runx1/Cx3cr1/Cdh5/Axl/Ptgs2/Calca/Rb1/Map3k13/Nr4a2/Rfx3/Bhlha15/Shb/Il15/Edn1/Gja1/Nemp1/Ctsl/S1pr1/Zbtb16/Lyl1/Ednrb/Clec7a/Bcl11a/Gal/Abhd2	30
BP	GO:1905954	positive regulation of lipid localization	17/997	127/28928	0.133858	3.8839	6.15368	1.80972e-06	2.51162e-05	1.47671e-05	Nfkbia/Dab2/Ptch1/Lrat/Runx1/Ptges/Hilpda/Il1a/Myb/Il1b/Plin2/Edn1/Ldlrap1/Atp8a1/Gal/Zc3h12a/Tac1	17
BP	GO:0001960	negative regulation of cytokine-mediated signaling pathway	14/997	88/28928	0.159091	4.61603	6.41847	1.82728e-06	2.52694e-05	1.48572e-05	Il6/Il1r2/Cish/Irak3/Il1rn/Tnfrsf11b/Naip6/Rabgef1/Tjp2/Parp14/Stat2/Mavs/Ecm1/Mmp12	14
BP	GO:0031100	animal organ regeneration	13/997	76/28928	0.171053	4.9631	6.53597	1.82998e-06	2.52694e-05	1.48572e-05	Hmox1/Ccl2/Cxcl5/Il6/Ptch1/Il10/Axl/Adm/Cebpb/Cpt1a/Anxa3/Slc7a5/Lif	13
BP	GO:0036230	granulocyte activation	11/997	54/28928	0.203704	5.91047	6.82374	1.89915e-06	2.61587e-05	1.53801e-05	Cxcl5/Ccl3/Stx11/Anxa1/Il18rap/Bcr/Il15/Ptafr/Cxcr2/Anxa3/Fcer1g	11
BP	GO:0042119	neutrophil activation	10/997	44/28928	0.227273	6.59433	7.0162	1.93184e-06	2.65422e-05	1.56056e-05	Cxcl5/Stx11/Anxa1/Il18rap/Bcr/Il15/Ptafr/Cxcr2/Anxa3/Fcer1g	10
BP	GO:0034142	toll-like receptor 4 signaling pathway	12/997	65/28928	0.184615	5.35662	6.64342	1.96674e-06	2.69542e-05	1.58478e-05	Nfkbia/Cd14/S100a14/Ninj1/Mfhas1/Sqstm1/Tril/Rab7b/Znrf1/Acod1/Tirap/Traf6	12
BP	GO:0035821	modulation of process of another organism	7/997	19/28928	0.368421	10.6898	7.98232	1.98173e-06	2.70244e-05	1.58891e-05	Cxcl5/Bcl2l11/Cxcl1/S100a9/Nos2/Ppara/Clec7a	7
BP	GO:0070486	leukocyte aggregation	7/997	19/28928	0.368421	10.6898	7.98232	1.98173e-06	2.70244e-05	1.58891e-05	Thbs1/S100a8/Nr4a3/S100a9/Cd44/Adam8/Il1b	7
BP	GO:0002675	positive regulation of acute inflammatory response	9/997	35/28928	0.257143	7.46101	7.22594	2.08335e-06	2.83398e-05	1.66624e-05	Il6/Adam8/Ptgs2/C2cd4b/Fcgr3/Il1b/Ccr5/Fcer1g/Tac1	9
BP	GO:0010565	regulation of cellular ketone metabolic process	20/997	172/28928	0.116279	3.37384	5.8994	2.19786e-06	2.97498e-05	1.74915e-05	Rdh10/Dab2/Egr1/Anxa1/Ptgs2/Avpr1a/Il1b/Pdk4/H6pd/Cpt1a/Acsl4/Ppara/Fgfr4/Insig2/Irs2/Slc7a11/Mfsd2a/Sox9/Dgat2/Fgf15	20
BP	GO:0050731	positive regulation of peptidyl-tyrosine phosphorylation	20/997	172/28928	0.116279	3.37384	5.8994	2.19786e-06	2.97498e-05	1.74915e-05	Areg/Itga5/Nrg1/Il6/Csf3/Icam1/Cd44/Epha4/Ntf3/Cd80/Gdnf/Ptpn1/Il34/Il15/Agrn/Parp14/Clec7a/Lif/Osm/Bank1	20
BP	GO:0002664	regulation of T cell tolerance induction	6/997	13/28928	0.461538	13.3916	8.44291	2.30145e-06	3.10752e-05	1.82708e-05	Lilrb4b/Lilrb4a/Runx1/Cd86/Cblb/Tgfbr2	6
BP	GO:0042116	macrophage activation	16/997	116/28928	0.137931	4.00208	6.12096	2.42411e-06	3.2571e-05	1.91502e-05	Thbs1/Sphk1/Il4ra/Sbno2/Havcr2/Il10/Cx3cr1/Tlr3/Adgrf5/Mfhas1/Jund/Tnip2/C5ar1/Mmp8/Slc11a1/Il1rl1	16
BP	GO:0042542	response to hydrogen peroxide	16/997	116/28928	0.137931	4.00208	6.12096	2.42411e-06	3.2571e-05	1.91502e-05	Areg/Sphk1/Hmox1/Nr4a3/Il6/Lcn2/Fosl1/Ripk3/Anxa1/Axl/Il18rap/Pld2/Capn2/Cryab/Edn1/Tnfaip3	16
BP	GO:0014013	regulation of gliogenesis	18/997	144/28928	0.125	3.62688	5.97038	2.48214e-06	3.32692e-05	1.95607e-05	Nrg1/Il6/Tnfrsf1b/Myc/Cysltr1/Ntf3/Vim/Id4/Rb1/Gfap/Egr2/Myb/Flt1/Il1b/Il34/Tspo/Slc7a5/Lif	18
BP	GO:0006898	receptor-mediated endocytosis	27/997	286/28928	0.0944056	2.73918	5.58448	2.53408e-06	3.38825e-05	1.99213e-05	Lilrb4b/Lilrb4a/Nrg1/Dab2/Cd14/Cd44/Sele/Arc/Ntf3/Ramp3/Tamalin/Ackr3/Rabgef1/Plk2/Adm/Pld2/Cxcl16/Lyve1/Ldlrap1/Cxcr2/Cblb/Tgfbr2/Serpine1/Fcgr2b/Scarb2/Adrb2/Fcer1g	27
BP	GO:1901617	organic hydroxy compound biosynthetic process	25/997	253/28928	0.0988142	2.8671	5.63549	2.61543e-06	3.48852e-05	2.05108e-05	Ch25h/Sphk1/Errfi1/Dab2/Ip6k2/Hdc/Itpkb/Cyp2r1/Gpr146/Nr4a2/Itpkc/Rapgef2/Ptafr/H6pd/Tph1/Slc27a2/Acer2/Plek/Por/Fgfr4/Sec14l2/Insig2/Npc1l1/Slc7a11/Fgf15	25
BP	GO:2000108	positive regulation of leukocyte apoptotic process	9/997	36/28928	0.25	7.25376	7.09349	2.69308e-06	3.58336e-05	2.10685e-05	Nr4a3/Bcl2l11/Cd44/Hcar2/Myc/Il10/Adam8/Anxa1/Rapgef2	9
BP	GO:0032731	positive regulation of interleukin-1 beta production	12/997	67/28928	0.179104	5.19672	6.49753	2.74876e-06	3.63978e-05	2.14002e-05	Hspb1/Il6/Ccl3/Ifi207/Egr1/Ccn1/Nlrp1b/Ccr5/Ifi213/Inava/Tlr8/Clec7a	12
BP	GO:0060760	positive regulation of response to cytokine stimulus	12/997	67/28928	0.179104	5.19672	6.49753	2.74876e-06	3.63978e-05	2.14002e-05	Hspa1b/Csf1/Hif1a/Il1r1/Axl/Edn1/Sting1/Mmp8/Parp14/Mavs/Trim6/Mmp12	12
BP	GO:0010718	positive regulation of epithelial to mesenchymal transition	11/997	56/28928	0.196429	5.69938	6.65047	2.77413e-06	3.66452e-05	2.15457e-05	Il6/Dab2/Gcnt2/Adam8/Axin2/Rgcc/Eng/Pdpn/Il1b/Tgfbr2/Fermt2	11
BP	GO:1903707	negative regulation of hemopoiesis	17/997	131/28928	0.129771	3.76531	5.99325	2.7936e-06	3.68137e-05	2.16447e-05	Tnfaip6/Lilrb4b/Lilrb4a/Hspb1/Ctla4/Il4ra/Ccl3/Trib1/Cd44/Myc/Nrarp/Tnfrsf11b/Runx1/Anxa1/Tjp2/Pf4/Zc3h12a	17
BP	GO:0032732	positive regulation of interleukin-1 production	13/997	79/28928	0.164557	4.77463	6.34714	2.87486e-06	3.77937e-05	2.22209e-05	Hspb1/Il6/Ccl3/Ifi207/Havcr2/Egr1/Ccn1/Nlrp1b/Ccr5/Ifi213/Inava/Tlr8/Clec7a	13
BP	GO:0034504	protein localization to nucleus	30/997	340/28928	0.0882353	2.56015	5.46727	2.88704e-06	3.7863e-05	2.22617e-05	Lilrb4b/Lilrb4a/Nuak2/Il6/Nfkbia/Glul/Trim8/Ptgs2/Nol8/Mfhas1/Sqstm1/Lmna/Ogt/Banp/Edn1/Bbs4/Yap1/Bag3/Zbtb16/Dtx3l/Mavs/Cry2/Chp2/Sox9/Sp100/Zc3h12a/Mmp12/Sin3a/Bcl3/Fermt2	30
BP	GO:0042113	B cell activation	29/997	323/28928	0.0897833	2.60507	5.48061	2.98534e-06	3.90588e-05	2.29647e-05	Lilrb4a/Ctla4/Il6/Ada/Blnk/Il10/Lig4/Ctps1/Lrrc8a/Myb/Cd86/Aplf/Shb/Prlr/Tnfaip3/Tnip2/Lyl1/Icosl/Fcgr2b/Irs2/Rasgrp1/Tirap/Cd180/Bcl11a/Prkdc/Fcrl1/Bcl3/Hmga1/Bank1	29
BP	GO:0006939	smooth muscle contraction	16/997	118/28928	0.135593	3.93424	6.03423	3.04655e-06	3.97648e-05	2.33798e-05	Sphk1/Ada/Gucy1a1/Ptgs1/Tbx3/Ptgs2/Calca/Gdnf/F2r/Flt1/Tacr1/Ptafr/Edn1/Bdkrb2/Ednrb/Adrb2	16
BP	GO:0031214	biomineral tissue development	21/997	191/28928	0.109948	3.19014	5.7375	3.05655e-06	3.98004e-05	2.34008e-05	Sbno2/Ccr1/Klf10/Ccn1/Fgfr1/Hif1a/Axin2/Ptgs2/Cebpb/Gja1/Tuft1/S1pr1/Ppara/Tmem119/Adrb2/Sox9/Osr1/Ecm1/Fam83h/Lox/Osr2	21
BP	GO:0060761	negative regulation of response to cytokine stimulus	14/997	92/28928	0.152174	4.41533	6.19891	3.15051e-06	4.09267e-05	2.4063e-05	Il6/Il1r2/Cish/Irak3/Il1rn/Tnfrsf11b/Naip6/Rabgef1/Tjp2/Parp14/Stat2/Mavs/Ecm1/Mmp12	14
BP	GO:0051047	positive regulation of secretion	36/997	451/28928	0.0798226	2.31606	5.32196	3.18554e-06	4.12059e-05	2.42271e-05	S100a8/Sphk1/Il4ra/Dab2/S100a9/Ildr1/Hcar2/Fgfr1/Hif1a/Glul/Inhbb/Runx1/Sdc4/Ptges/Rgcc/Gab2/Lrrc8a/Il1a/Myb/Tacr1/Avpr1a/Pld2/Il1b/Cd160/Ptafr/Edn1/Gja1/A1cf/Acsl4/Fgfr4/Oga/Irs2/Lif/Gal/Fcer1g/Tac1	36
BP	GO:0070664	negative regulation of leukocyte proliferation	15/997	105/28928	0.142857	4.14501	6.09962	3.18703e-06	4.12059e-05	2.42271e-05	Lilrb4b/Lilrb4a/Ctla4/Havcr2/Cd44/Il10/Sdc4/Cd80/Il20rb/Cd86/Lrrc32/Cebpb/Cblb/Fcgr2b/Gal	15
BP	GO:0002534	cytokine production involved in inflammatory response	12/997	68/28928	0.176471	5.1203	6.42675	3.23389e-06	4.17134e-05	2.45255e-05	Lilrb4b/Lilrb4a/Il6/Il1r2/Hif1a/Tlr3/Per1/Nos2/Ppara/Clec7a/Zc3h12a/Il17ra	12
BP	GO:0035296	regulation of tube diameter	21/997	192/28928	0.109375	3.17352	5.70896	3.32237e-06	4.25668e-05	2.50273e-05	Icam1/Dusp5/Gucy1a1/Hif1a/Ptgs1/Cysltr1/Ptgs2/Calca/Tgfbr3/Adm/Ece1/F2r/Gclc/Tacr1/Avpr1a/Edn1/Bdkrb2/Gja1/Ednrb/Adrb2/Nts	21
BP	GO:0097746	blood vessel diameter maintenance	21/997	192/28928	0.109375	3.17352	5.70896	3.32237e-06	4.25668e-05	2.50273e-05	Icam1/Dusp5/Gucy1a1/Hif1a/Ptgs1/Cysltr1/Ptgs2/Calca/Tgfbr3/Adm/Ece1/F2r/Gclc/Tacr1/Avpr1a/Edn1/Bdkrb2/Gja1/Ednrb/Adrb2/Nts	21
BP	GO:0043300	regulation of leukocyte degranulation	11/997	57/28928	0.192982	5.59939	6.56694	3.33111e-06	4.25668e-05	2.50273e-05	Hmox1/Il4ra/D6Wsu163e/Foxf1/Gab2/Rabgef1/Bcr/Pld2/Cd160/Ptafr/Fcer1g	11
BP	GO:0045581	negative regulation of T cell differentiation	11/997	57/28928	0.192982	5.59939	6.56694	3.33111e-06	4.25668e-05	2.50273e-05	Lilrb4b/Lilrb4a/Hspb1/Ctla4/Il4ra/Cd44/Nrarp/Runx1/Anxa1/Pf4/Zc3h12a	11
BP	GO:0045639	positive regulation of myeloid cell differentiation	16/997	119/28928	0.134454	3.90118	5.99157	3.40861e-06	4.34118e-05	2.55241e-05	Ccl3/Ccr1/Trib1/Csf3/Klf10/Hspa1b/Csf1/Hif1a/Runx1/Ninj1/Rb1/Il34/Rab7b/Lif/Prkdc/Traf6	16
BP	GO:2000241	regulation of reproductive process	23/997	224/28928	0.102679	2.97922	5.61828	3.41307e-06	4.34118e-05	2.55241e-05	Plat/Ada/Inhbb/Runx1/Zwint/Ovol1/Il1a/Tacr1/Dusp1/Tpst2/Shb/Ptafr/Cdc20/Timp1/Gja1/Acvr1c/Ednrb/Prdm9/Lif/Sox9/Tac1/Osm/Vip	23
BP	GO:0010574	regulation of vascular endothelial growth factor production	9/997	37/28928	0.243243	7.05771	6.96601	3.4502e-06	4.37824e-05	2.5742e-05	Ccl2/Il6/Hif1a/Ptgs2/Il1a/Flt1/Il1b/C5ar1/Gata4	9
BP	GO:0007623	circadian rhythm	25/997	257/28928	0.0972763	2.82248	5.54451	3.46565e-06	4.38769e-05	2.57976e-05	Sik1/Il6/Ada/Klf10/Csnk1e/Egr1/Id3/Prkcg/Id4/Pln/Per1/Dpyd/Ogt/Nos2/Rorc/Agrn/Tph1/Bhlhe40/Ppara/Nudt12/Cry2/Crem/Sin3a/Prkdc/Id1	25
BP	GO:0035150	regulation of tube size	21/997	193/28928	0.108808	3.15708	5.68061	3.60902e-06	4.55867e-05	2.68028e-05	Icam1/Dusp5/Gucy1a1/Hif1a/Ptgs1/Cysltr1/Ptgs2/Calca/Tgfbr3/Adm/Ece1/F2r/Gclc/Tacr1/Avpr1a/Edn1/Bdkrb2/Gja1/Ednrb/Adrb2/Nts	21
BP	GO:0051402	neuron apoptotic process	33/997	398/28928	0.0829146	2.40577	5.33533	3.63138e-06	4.57637e-05	2.69069e-05	Hmox1/Nr4a3/Il6/Ccl3/Bcl2l11/Lcn2/Egr1/Epha4/Il10/Lig4/Nlrp1b/Adam8/Epha7/Hif1a/Fgf2/Prkcg/Ntf3/Cx3cr1/Axl/Rb1/Myb/Gdnf/F2r/Nr4a2/Gclc/Mt1/Il1b/Cebpb/Agrn/Ccr5/Pmaip1/C5ar1/Fcgr2b	33
BP	GO:0014074	response to purine-containing compound	19/997	163/28928	0.116564	3.38212	5.76211	3.77534e-06	4.72561e-05	2.77843e-05	Fosb/Areg/Ccl2/Stc1/Ada/Fosl1/Thbd/Inhbb/Ptgs2/Per1/Rapgef2/Il1b/Ssh1/Ptafr/Itpr2/Hcn4/Nt5e/Crem/Hmga1	19
BP	GO:0006940	regulation of smooth muscle contraction	12/997	69/28928	0.173913	5.04609	6.35735	3.7929e-06	4.72561e-05	2.77843e-05	Sphk1/Ada/Gucy1a1/Ptgs1/Ptgs2/Calca/F2r/Flt1/Tacr1/Ptafr/Edn1/Adrb2	12
BP	GO:0061082	myeloid leukocyte cytokine production	12/997	69/28928	0.173913	5.04609	6.35735	3.7929e-06	4.72561e-05	2.77843e-05	Hmox1/Nr4a3/Sema7a/Irak3/Tlr3/Axl/Rabgef1/Il1b/Mavs/Rasgrp1/Tirap/Fcer1g	12
BP	GO:0071622	regulation of granulocyte chemotaxis	12/997	69/28928	0.173913	5.04609	6.35735	3.7929e-06	4.72561e-05	2.77843e-05	Thbs1/Tnfaip6/Ccl2/Csf1/S100a14/Trem1/Il1b/Il34/Edn1/Cxcr2/C5ar1/Tirap	12
BP	GO:1905517	macrophage migration	12/997	69/28928	0.173913	5.04609	6.35735	3.7929e-06	4.72561e-05	2.77843e-05	Thbs1/Ccl2/Ccl3/Csf1/Ninj1/Cx3cr1/Gpr35/Bcr/Trem1/Il34/C5ar1/Ednrb	12
BP	GO:1903036	positive regulation of response to wounding	13/997	81/28928	0.160494	4.65674	6.22647	3.83722e-06	4.76999e-05	2.80453e-05	Thbs1/Ccl2/Nrg1/Plat/S100a9/Hif1a/Anxa1/F2r/Serpine1/Ndel1/Plau/Clec7a/Fermt2	13
BP	GO:2001242	regulation of intrinsic apoptotic signaling pathway	21/997	194/28928	0.108247	3.1408	5.65244	3.91794e-06	4.85931e-05	2.85705e-05	S100a8/Hspb1/Bcl2l11/S100a9/Cd44/Plaur/Myc/Il10/Ripk3/Hif1a/Fgf2/Ptgs2/Ackr3/Ptpn1/Plscr1/Bdkrb2/Pmaip1/Fcgr2b/Gsdme/Gata4/Herpud1	21
BP	GO:0072091	regulation of stem cell proliferation	15/997	107/28928	0.140187	4.06753	6.00596	4.04995e-06	5.0117e-05	2.94665e-05	Cxcl1/Ptch1/Fgfr1/Fgf2/Tbx3/Taf4b/Ovol1/Gja1/Sfn/Tgfbr2/Yap1/Pim1/Sox9/Osr2/Fermt2	15
BP	GO:0002702	positive regulation of production of molecular mediator of immune response	18/997	149/28928	0.120805	3.50517	5.79227	4.05918e-06	5.01181e-05	2.94671e-05	Nr4a3/Il4ra/Il6/Sema7a/Il10/Il1r1/Tlr3/Arid5a/Cd86/Il1b/Cd160/Inava/Mavs/Trim6/Clec7a/Tirap/Fcer1g/Traf6	18
BP	GO:0032310	prostaglandin secretion	7/997	21/28928	0.333333	9.67168	7.51048	4.30494e-06	5.3033e-05	3.11809e-05	Ptges/Ptgs2/Il1a/Il1b/Nos2/Edn1/Acsl4	7
BP	GO:0034143	regulation of toll-like receptor 4 signaling pathway	8/997	29/28928	0.275862	8.00415	7.12966	4.35927e-06	5.35819e-05	3.15036e-05	Cd14/Ninj1/Mfhas1/Sqstm1/Rab7b/Znrf1/Acod1/Tirap	8
BP	GO:0048246	macrophage chemotaxis	10/997	48/28928	0.208333	6.0448	6.60879	4.49446e-06	5.512e-05	3.2408e-05	Thbs1/Ccl2/Ccl3/Csf1/Ninj1/Gpr35/Trem1/Il34/C5ar1/Ednrb	10
BP	GO:0001906	cell killing	27/997	295/28928	0.0915254	2.65561	5.39999	4.53715e-06	5.55194e-05	3.26428e-05	Ccl2/Cxcl5/Bcl2l11/Cxcl1/Havcr2/Stx11/Ripk3/Pvr/Ninj1/Cx3cr1/Il18rap/Fcgr3/Trem1/Ccl11/Cd160/Nos2/Gbp2b/Ccr5/Cxcl10/Fcgr2b/Oga/Rasgrp1/Gbp2/Klrb1b/Clec7a/Nts/Tac1	27
BP	GO:0014909	smooth muscle cell migration	16/997	122/28928	0.131148	3.80525	5.86633	4.73762e-06	5.78433e-05	3.40091e-05	Adamts1/Nr4a3/Plat/Trib1/Egr1/Myc/Ccn3/F3/Ptpn1/Tacr1/Ssh1/Sema6d/Serpine1/Plau/Igfbp3/Abhd2	16
BP	GO:2000379	positive regulation of reactive oxygen species metabolic process	13/997	83/28928	0.156627	4.54453	6.10967	5.07437e-06	6.18171e-05	3.63455e-05	Thbs1/Cxcl1/Lcn2/Ripk3/Slc5a3/Ogt/Acod1/Tgfbr2/Tspo/Plau/Gadd45a/Clec7a/Zc3h12a	13
BP	GO:0044843	cell cycle G1/S phase transition	25/997	263/28928	0.095057	2.75808	5.41125	5.22108e-06	6.34633e-05	3.73135e-05	Adamts1/Stxbp4/Myc/Fam107a/Cenpj/Bcl7a/Susd2/Anxa1/Plk3/Id4/Rgcc/Rb1/Ccne2/Plk2/Pdpn/Myb/Klf11/Prmt2/Skp2/Ctdsp1/Cables1/Lsm10/Cirbp/Sde2/Prkdc	25
BP	GO:0007254	JNK cascade	21/997	198/28928	0.106061	3.07735	5.54155	5.40846e-06	6.55956e-05	3.85671e-05	Trib1/Dab2/Gadd45g/Gadd45b/Naip6/Tlr3/Map3k13/Per1/Il1a/Mfhas1/Map3k6/Il1b/Edn1/Fgd4/Mdfi/Gadd45a/Fcgr2b/Rasgrp1/Tirap/Fgf15/Traf6	21
BP	GO:0015833	peptide transport	30/997	351/28928	0.0854701	2.47992	5.27034	5.46258e-06	6.60908e-05	3.88583e-05	S100a8/Il6/Stxbp4/S100a9/Ildr1/Klf7/Il1rn/Hif1a/Ccn3/Glul/Inhbb/Anxa1/Lrrc8a/Rfx3/Pim3/Il1b/Nos2/Edn1/Gja1/Cpt1a/Slc15a3/Acvr1c/Acsl4/Oga/Irs2/Lif/Fam3b/Midn/Vip/Hmga1	30
BP	GO:0002369	T cell cytokine production	10/997	49/28928	0.204082	5.92144	6.51411	5.4734e-06	6.60908e-05	3.88583e-05	Lilrb4b/Lilrb4a/Il6/Tnfrsf1b/Il1r1/Il18rap/Arid5a/Il1b/Slc11a1/Traf6	10
BP	GO:0036314	response to sterol	9/997	39/28928	0.230769	6.69578	6.72474	5.52448e-06	6.65609e-05	3.91347e-05	Ccl3/Ptch1/Inhbb/Rorc/Gramd1a/Ccr5/Tgfbr2/Insig2/Lrp8	9
BP	GO:0034612	response to tumor necrosis factor	23/997	231/28928	0.0995671	2.88894	5.44581	5.72237e-06	6.8794e-05	4.04476e-05	Sphk1/Ccl2/Il6/Akap12/Nfkbia/Tnfrsf1b/Cd14/Hspa1b/Tnfrsf11b/Krt18/Cx3cr1/Naip6/Ptgs2/Cxcl16/Plvap/Nos2/Edn1/Tjp2/Acod1/Mmp8/Gsdme/Zc3h12a/Traf6	23
BP	GO:0031664	regulation of lipopolysaccharide-mediated signaling pathway	8/997	30/28928	0.266667	7.73735	6.97544	5.76521e-06	6.90062e-05	4.05724e-05	Trib1/Cd14/Trim30d/Trim12c/Tnfaip3/Acod1/Cd180/Traf6	8
BP	GO:1900745	positive regulation of p38MAPK cascade	8/997	30/28928	0.266667	7.73735	6.97544	5.76521e-06	6.90062e-05	4.05724e-05	Sphk1/Gadd45g/Gadd45b/Mfhas1/Rell1/Il1b/Gadd45a/Zc3h12a	8
BP	GO:0002088	lens development in camera-type eye	14/997	97/28928	0.14433	4.18774	5.94148	5.96256e-06	7.1213e-05	4.18699e-05	Spry2/Adamts9/Epha2/Fgf2/Vim/Cryab/Slitrk6/Gja1/Spry1/Spred1/Tgfbr2/Maf/Slc7a11/Meis1	14
BP	GO:0045600	positive regulation of fat cell differentiation	12/997	72/28928	0.166667	4.83584	6.15694	6.01257e-06	7.16541e-05	4.21293e-05	Medag/Sh3pxd2b/Axin2/Ptgs2/Lmo3/Cebpb/Crebl2/Tph1/Zbtb16/Pim1/Zc3h12a/Napepld	12
BP	GO:0045861	negative regulation of proteolysis	30/997	353/28928	0.0849858	2.46587	5.23534	6.11269e-06	7.25336e-05	4.26464e-05	Thbs1/Plat/Ifi207/Il1r2/Cd44/Plaur/Epha4/Il10/Hspa1b/Nr4a1/Ctla2a/Serpina3n/Timp3/Prkcg/Naip6/Serpina3f/Ptgs2/Ogt/Cryab/Timp1/Cstb/Serpina3m/Ifi213/Serpine1/Plau/Bcl2a1d/Ecm1/Pi15/Serpina3c/Stfa2l1	30
BP	GO:0060602	branch elongation of an epithelium	7/997	22/28928	0.318182	9.23206	7.29763	6.12606e-06	7.25336e-05	4.26464e-05	Areg/Rdh10/Spry2/Spry1/Yap1/Tnc/Sox9	7
BP	GO:0090050	positive regulation of cell migration involved in sprouting angiogenesis	7/997	22/28928	0.318182	9.23206	7.29763	6.12606e-06	7.25336e-05	4.26464e-05	Hmox1/Fgf2/Rhoj/Anxa1/Ptgs2/Plk2/Tgfbr3	7
BP	GO:0072001	renal system development	32/997	390/28928	0.0820513	2.38072	5.1866	6.29862e-06	7.44161e-05	4.37531e-05	Adamts1/Rdh10/Bcl2l11/Gpr4/Ptch1/Cd44/Egr1/Myc/Epha4/Fgfr1/Epha7/Id3/Schip1/Pgf/Adamts6/Fgf2/Sdc4/Foxf1/Tiparp/Ovol1/Gdnf/Edn1/Cxcr2/Spry1/Gcnt1/Yap1/Nek1/Ednrb/Lif/Sox9/Osr1/Osr2	32
BP	GO:0044344	cellular response to fibroblast growth factor stimulus	15/997	111/28928	0.135135	3.92095	5.82529	6.42457e-06	7.56975e-05	4.45066e-05	Thbs1/Spry2/Cd44/Fgfr1/Nr4a1/Fgf2/Spry4/Spry3/Ptpn1/Gclc/Ndst1/Spry1/Flrt2/Fgfr4/Fgf15	15
BP	GO:0006937	regulation of muscle contraction	19/997	169/28928	0.112426	3.26205	5.57204	6.4347e-06	7.56975e-05	4.45066e-05	Sphk1/Stc1/Ada/Nr4a1/Gucy1a1/Ptgs1/Ptgs2/Pln/Calca/F2r/Flt1/Tacr1/Ptafr/Agrn/Edn1/Hcn4/Adrb2/Zc3h12a/Gata4	19
BP	GO:0001936	regulation of endothelial cell proliferation	18/997	154/28928	0.116883	3.39137	5.62164	6.48847e-06	7.61666e-05	4.47824e-05	Thbs1/Hmox1/Ccl2/Il10/Fgfr1/Nr4a1/Nrarp/Pgf/Fgf2/F3/Rgcc/Eng/Flt1/Ccl11/Gja1/Nr2f2/Ecm1/Vip	18
BP	GO:0003007	heart morphogenesis	27/997	301/28928	0.089701	2.60268	5.28078	6.58808e-06	7.71706e-05	4.53727e-05	Thbs1/Adamts1/Nrg1/Fhl2/Ptch1/Fzd2/Ccn1/Ephb4/Hif1a/Foxf1/Tbx3/Axin2/Tgfbr3/Asb2/Eng/Edn1/Gja1/Spry1/Tgfbr2/Yap1/Ube4b/Flrt2/S1pr1/Pim1/Sox9/Gata4/Cplane2	27
BP	GO:0001755	neural crest cell migration	11/997	61/28928	0.180328	5.23222	6.25156	6.65676e-06	7.78089e-05	4.5748e-05	Sema7a/Hif1a/Sema6a/Sema6b/Gdnf/Sema4a/Sema4c/Edn1/Sema6d/Ednrb/Fgf15	11
BP	GO:0007611	learning or memory	30/997	356/28928	0.0842697	2.44509	5.18328	7.22166e-06	8.42322e-05	4.95246e-05	Itga5/Nrg1/Abl2/Lcn2/Rcan1/Fosl1/Egr1/Arc/Il1rn/Hif1a/Ptgs1/Prkcg/Cx3cr1/Ptgs2/Rin1/Pln/Plk2/Grpr/Egr2/Nr4a2/Tacr1/Ccl11/Il1b/Meis2/Atp8a1/Slc7a11/Adrb2/Nts/Tac1/Vip	30
BP	GO:0007179	transforming growth factor beta receptor signaling pathway	22/997	218/28928	0.100917	2.92812	5.39887	7.31073e-06	8.509e-05	5.00289e-05	Thbs1/Ccl2/Dab2/Gcnt2/Spry2/Zyx/Cdh5/Tgfbr3/Eng/Gdnf/Pmepa1/Ogt/Lrrc32/Spry1/Spred1/Tgfbr2/Acvr1c/Ppara/Tnrc6c/Lox/Sin3a/Fermt2	22
BP	GO:0051346	negative regulation of hydrolase activity	27/997	303/28928	0.0891089	2.5855	5.24168	7.44068e-06	8.64191e-05	5.08103e-05	Thbs1/Ifi207/Spry2/Cd44/Plaur/Hspa1b/Nr4a1/Serpina3n/Sh3bp4/Timp3/Naip6/Serpina3f/Ptgs2/Cryab/Bbs4/Timp1/Spry1/Cstb/Serpina3m/Ifi213/Serpine1/Angptl4/Bcl2a1d/Ecm1/Pi15/Serpina3c/Stfa2l1	27
BP	GO:0001822	kidney development	31/997	375/28928	0.0826667	2.39858	5.1503	7.53151e-06	8.71601e-05	5.1246e-05	Adamts1/Rdh10/Bcl2l11/Gpr4/Ptch1/Cd44/Egr1/Myc/Epha4/Fgfr1/Epha7/Id3/Schip1/Pgf/Adamts6/Fgf2/Sdc4/Tiparp/Ovol1/Gdnf/Edn1/Cxcr2/Spry1/Gcnt1/Yap1/Nek1/Ednrb/Lif/Sox9/Osr1/Osr2	31
BP	GO:0090594	inflammatory response to wounding	8/997	31/28928	0.258065	7.48775	6.82818	7.53628e-06	8.71601e-05	5.1246e-05	Hmox1/Il6/Cd44/Hif1a/Tlr3/Il1a/F2r/Timp1	8
BP	GO:0050671	positive regulation of lymphocyte proliferation	18/997	156/28928	0.115385	3.34789	5.55534	7.78042e-06	8.97943e-05	5.27948e-05	Il6/Ada/Havcr2/Slc7a1/Anxa1/Cd80/Il1a/Tacr1/Cd86/Il1b/Il15/Prlr/Tgfbr2/Icosl/Irs2/Tirap/Tac1/Traf6	18
BP	GO:0031663	lipopolysaccharide-mediated signaling pathway	11/997	62/28928	0.177419	5.14783	6.17703	7.84238e-06	9.03191e-05	5.31034e-05	Nfkbia/Trib1/Cd14/Trim30d/Irak3/Trim12c/Ptafr/Tnfaip3/Acod1/Cd180/Traf6	11
BP	GO:0045807	positive regulation of endocytosis	21/997	203/28928	0.103448	3.00156	5.40682	7.98576e-06	9.17776e-05	5.39609e-05	Ccl2/Dab2/Cd14/Sele/Ntf3/Axl/Plk2/Bcr/Fcgr3/Ppp3cc/Pld2/Il15/Il2rb/Ldlrap1/Serpine1/Slc11a1/Fcgr2b/Clec7a/Mex3b/Fcer1g/Mertk	21
BP	GO:0046634	regulation of alpha-beta T cell activation	16/997	127/28928	0.125984	3.65544	5.66618	8.00516e-06	9.18081e-05	5.39789e-05	Lilrb4b/Lilrb4a/Il4ra/Il6/Ada/Cd44/Runx1/Anxa1/Itpkb/Cd80/Shb/Cd160/Cblb/Pf4/Tgfbr2/Zc3h12a	16
BP	GO:0006109	regulation of carbohydrate metabolic process	22/997	220/28928	0.1	2.9015	5.34889	8.4626e-06	9.68517e-05	5.69443e-05	Sik1/Il6/Ier3/Myc/Hif1a/Ddit4/Ogt/Pdk4/Rorc/Ptafr/Ppp1r3c/Slc4a4/Plek/Pmaip1/Ppara/Phlda2/Irs2/Scarb2/Igfbp3/Cbfa2t3/Midn/Dgat2	22
BP	GO:0002693	positive regulation of cellular extravasation	7/997	23/28928	0.304348	8.83067	7.09794	8.54434e-06	9.75835e-05	5.73745e-05	Ccl2/Icam1/Adam8/Il1r1/Lyve1/Plvap/Ptafr	7
BP	GO:0002790	peptide secretion	29/997	341/28928	0.085044	2.46756	5.15043	8.56874e-06	9.76455e-05	5.7411e-05	S100a8/Il6/Stxbp4/S100a9/Ildr1/Klf7/Il1rn/Hif1a/Ccn3/Glul/Inhbb/Anxa1/Lrrc8a/Rfx3/Pim3/Il1b/Nos2/Edn1/Gja1/Cpt1a/Acvr1c/Acsl4/Oga/Irs2/Lif/Fam3b/Midn/Vip/Hmga1	29
BP	GO:0032743	positive regulation of interleukin-2 production	9/997	41/28928	0.219512	6.36916	6.49984	8.5854e-06	9.76455e-05	5.7411e-05	Pde4b/Abl2/Runx1/Anxa1/Il1a/Irf4/Il1b/Clec7a/Traf6	9
BP	GO:0042692	muscle cell differentiation	37/997	491/28928	0.0753564	2.18647	5.0097	8.6781e-06	9.84955e-05	5.79107e-05	Sik1/Nrg1/Il4ra/Fhl2/Rcan1/Ereg/Myc/Ccn3/Foxf1/Csrp1/Ninj1/Tbx3/Ntf3/Rb1/Flnc/Adm/Asb2/Eng/Sox6/Avpr1a/Lmna/Capn2/Rgs4/Bhlha15/Sema4c/Edn1/Ldb3/Ppara/Tmem119/Cxcl10/Ednrb/Meis1/Sox9/Lox/Gata4/Bcl9/Ifrd1	37
BP	GO:0010595	positive regulation of endothelial cell migration	15/997	114/28928	0.131579	3.81777	5.69524	8.9487e-06	0.000101357	5.95931e-05	Thbs1/Hmox1/Hspb1/Lcn2/Fgfr1/Hif1a/Fgf2/Rhoj/Anxa1/Ptgs2/Plk2/Tgfbr3/Map2k3/Anxa3/Zc3h12a	15
BP	GO:0043030	regulation of macrophage activation	11/997	63/28928	0.174603	5.06612	6.10409	9.20771e-06	0.000103861	6.10656e-05	Thbs1/Sphk1/Il4ra/Havcr2/Il10/Adgrf5/Mfhas1/Jund/Tnip2/Mmp8/Il1rl1	11
BP	GO:0090497	mesenchymal cell migration	11/997	63/28928	0.174603	5.06612	6.10409	9.20771e-06	0.000103861	6.10656e-05	Sema7a/Hif1a/Sema6a/Sema6b/Gdnf/Sema4a/Sema4c/Edn1/Sema6d/Ednrb/Fgf15	11
BP	GO:1902905	positive regulation of supramolecular fiber organization	20/997	189/28928	0.10582	3.07038	5.39511	9.29375e-06	0.000104617	6.15097e-05	Csf3/Icam1/Baiap2/Hspa1b/Hspa1a/Sh3pxd2b/Sdc4/Rgcc/Rb1/Tacr1/Ccl11/Cdc42ep3/Edn1/Plek/Cracd/Cdc42ep2/Tac1/Id1/Fermt2/Myo1c	20
BP	GO:1903320	regulation of protein modification by small protein conjugation or removal	24/997	255/28928	0.0941176	2.73083	5.24497	9.46636e-06	0.000106341	6.25237e-05	Sphk1/Trib1/Spry2/Egr1/Hspa1b/Fam107a/Hif1a/Prkcg/Gclc/Sqstm1/Dcun1d2/Skp2/Ogt/Cdc20/Bag2/Tnfaip3/Rasd2/Cblb/Inava/Tspo/Dtx3l/Arrdc3/Zc3h12a/Herpud1	24
BP	GO:0001570	vasculogenesis	14/997	101/28928	0.138614	4.02189	5.74772	9.62848e-06	0.000107607	6.32677e-05	Fgfr1/Junb/Epha2/Foxf1/Ackr3/Tiparp/Tgfbr3/Adm/Eng/Rapgef2/Spred1/Tgfbr2/Yap1/Gata4	14
BP	GO:0014033	neural crest cell differentiation	14/997	101/28928	0.138614	4.02189	5.74772	9.62848e-06	0.000107607	6.32677e-05	Rdh10/Sema7a/Hif1a/Sema6a/Sema6b/Gdnf/Kbtbd8/Sema4a/Sema4c/Edn1/Sema6d/Ednrb/Sox9/Fgf15	14
BP	GO:0009314	response to radiation	36/997	474/28928	0.0759494	2.20367	4.99209	9.63789e-06	0.000107607	6.32677e-05	Ccl2/Sik1/Cxcl2/Abl2/Ifi207/Egr1/Myc/Lig4/Nlrp1b/Hif1a/Thbd/Plk3/Ccl7/Pln/Cyp2r1/Per1/Il1a/Cryab/Mmp3/Timp1/Pmaip1/Yap1/Bhlhe40/Nek1/Ifi213/Ube4b/Meis2/Gadd45a/Cirbp/Slc7a11/Poli/Cry2/Sde2/Nts/Prkdc/Bcl3	36
BP	GO:0001516	prostaglandin biosynthetic process	8/997	32/28928	0.25	7.25376	6.68734	9.74562e-06	0.00010793	6.34579e-05	Sphk1/Ptgs1/Anxa1/Ptges/Ptgs2/Avpr1a/Il1b/Edn1	8
BP	GO:0002825	regulation of T-helper 1 type immune response	8/997	32/28928	0.25	7.25376	6.68734	9.74562e-06	0.00010793	6.34579e-05	Il4ra/Havcr2/Il1r1/Anxa1/Arid5a/Il1b/Slc11a1/Il1rl1	8
BP	GO:0043032	positive regulation of macrophage activation	8/997	32/28928	0.25	7.25376	6.68734	9.74562e-06	0.00010793	6.34579e-05	Thbs1/Il4ra/Havcr2/Il10/Jund/Tnip2/Mmp8/Il1rl1	8
BP	GO:0046457	prostanoid biosynthetic process	8/997	32/28928	0.25	7.25376	6.68734	9.74562e-06	0.00010793	6.34579e-05	Sphk1/Ptgs1/Anxa1/Ptges/Ptgs2/Avpr1a/Il1b/Edn1	8
BP	GO:0048771	tissue remodeling	22/997	222/28928	0.0990991	2.87536	5.29946	9.77639e-06	0.000108053	6.353e-05	Ccl2/Il6/Adam8/Hif1a/Tnfrsf11b/Epha2/Axl/Tgfbr3/Bcr/Il1a/F2r/Pdk4/Nos2/Tph1/Timp1/Gja1/S1pr1/Tmem119/Adrb2/Lif/Gata4/Traf6	22
BP	GO:2000242	negative regulation of reproductive process	13/997	88/28928	0.147727	4.28631	5.83323	9.82813e-06	0.000108406	6.37377e-05	Plat/Ada/Zwint/Ovol1/Il1a/Dusp1/Tpst2/Shb/Timp1/Gja1/Acvr1c/Lif/Osm	13
BP	GO:0046330	positive regulation of JNK cascade	15/997	115/28928	0.130435	3.78457	5.65287	9.96731e-06	0.000109501	6.43812e-05	Dab2/Gadd45g/Gadd45b/Naip6/Tlr3/Il1a/Mfhas1/Il1b/Edn1/Fgd4/Gadd45a/Fcgr2b/Rasgrp1/Tirap/Fgf15	15
BP	GO:0048525	negative regulation of viral process	15/997	115/28928	0.130435	3.78457	5.65287	9.96731e-06	0.000109501	6.43812e-05	Ch25h/Ifi207/Trim30d/Trim8/Ifitm1/Hexim1/Trim12c/Plscr1/Tasor/Ifitm6/Ifi213/Mavs/Trim6/Sp100/Oasl2	15
BP	GO:0000302	response to reactive oxygen species	22/997	223/28928	0.0986547	2.86247	5.27496	1.05002e-05	0.000114668	6.74195e-05	Areg/Sphk1/Hmox1/Nr4a3/Il6/Lcn2/Fosl1/Ripk3/Hif1a/Anxa1/Plk3/Axl/Il18rap/Il1a/Tacr1/Pld2/Capn2/Cryab/Mmp3/Edn1/Tnfaip3/Prdx6	22
BP	GO:0010966	regulation of phosphate transport	5/997	10/28928	0.5	14.5075	8.07138	1.05004e-05	0.000114668	6.74195e-05	Fgfr1/Cebpb/Fgfr4/Stc2/Cry2	5
BP	GO:0032762	mast cell cytokine production	5/997	10/28928	0.5	14.5075	8.07138	1.05004e-05	0.000114668	6.74195e-05	Hmox1/Nr4a3/Rabgef1/Rasgrp1/Fcer1g	5
BP	GO:0001885	endothelial cell development	12/997	76/28928	0.157895	4.58132	5.90634	1.07004e-05	0.000116619	6.85665e-05	Stc1/Icam1/Clic4/Cdh5/Robo4/Rapgef2/Il1b/Tjp2/Vcl/S1pr3/Ednrb/Id1	12
BP	GO:0006693	prostaglandin metabolic process	11/997	64/28928	0.171875	4.98696	6.03267	1.07752e-05	0.00011697	6.87727e-05	Sphk1/Ptgs1/Anxa1/Ptges/Ptgs2/Pdpn/Avpr1a/Il1b/Edn1/Ptgr1/Ces2a	11
BP	GO:0090303	positive regulation of wound healing	11/997	64/28928	0.171875	4.98696	6.03267	1.07752e-05	0.00011697	6.87727e-05	Thbs1/Ccl2/Plat/S100a9/Hif1a/Anxa1/F2r/Serpine1/Plau/Clec7a/Fermt2	11
BP	GO:0062014	negative regulation of small molecule metabolic process	16/997	130/28928	0.123077	3.57108	5.55089	1.08179e-05	0.000117201	6.89089e-05	Ch25h/Sik1/Il6/Ier3/Ddit4/Entpd1/Plek/Ppara/Tspo/Insig2/Mfsd2a/Sox9/Cbfa2t3/Dgat2/Fgf15/Cda	16
BP	GO:0031669	cellular response to nutrient levels	25/997	275/28928	0.0909091	2.63773	5.15561	1.13614e-05	0.000122846	7.22279e-05	Nuak2/Rnf152/Klf10/Ifi207/Fam107a/Glul/Inhbb/Slc2a1/Zfyve1/Ogt/Plin2/Bhlha15/Pdk4/Pmaip1/Ctsl/Ifi213/Ppara/Prkab2/Gabarapl1/Angptl4/Slc7a5/Pim1/Mfsd2a/Tnc/Zc3h12a	25
BP	GO:0006909	phagocytosis	23/997	241/28928	0.0954357	2.76907	5.21035	1.15037e-05	0.00012414	7.29884e-05	Thbs1/Sphk1/Ccl2/Abl2/Prkcg/Mst1r/Anxa1/Axl/Bcr/Fcgr3/Plscr1/Pot1b/Rab7b/Il15/Il2rb/Anxa3/Slc11a1/Fcgr2b/Clec7a/Havcr1/Mex3b/Fcer1g/Mertk	23
BP	GO:0010232	vascular transport	7/997	24/28928	0.291667	8.46272	6.91003	1.17041e-05	0.000125807	7.39688e-05	Abcc1/Slc2a1/Abcg2/Gja1/Mfsd2a/Slc27a1/Flvcr2	7
BP	GO:0097398	cellular response to interleukin-17	7/997	24/28928	0.291667	8.46272	6.91003	1.17041e-05	0.000125807	7.39688e-05	Il6/Socs3/Cxcl1/Il1b/Cxcl10/Il17ra/Traf6	7
BP	GO:0097305	response to alcohol	31/997	384/28928	0.0807292	2.34236	5.00303	1.20665e-05	0.00012945	7.61102e-05	Fosb/Ccl2/Ccl3/Csf3/Ptch1/Cd14/Fosl1/Arc/Inhbb/Fgf2/Ccl7/Tgfbr3/Tacr1/Avpr1a/Fkbp5/Klf9/Gramd1a/Ccr5/Cpt1a/Pf4/Tgfbr2/Itpr2/Ppara/Tspo/Slc23a2/P2ry4/Tnc/Lrp8/St6gal1/Fgf15/Cda	31
BP	GO:0008360	regulation of cell shape	17/997	146/28928	0.116438	3.37846	5.44338	1.22295e-05	0.000130687	7.68376e-05	Il6/Ccl3/Icam1/Baiap2/Prag1/Pakap/Rhoj/Anxa1/Ccl7/Pdpn/Sema4a/Ccl11/Cdc42ep3/Fmnl2/Fgd4/Cdc42ep2/Fermt2	17
BP	GO:0045621	positive regulation of lymphocyte differentiation	17/997	146/28928	0.116438	3.37846	5.44338	1.22295e-05	0.000130687	7.68376e-05	Lilrb4b/Lilrb4a/Il4ra/Il6/Ada/Il10/Adam8/Il1rl2/Runx1/Anxa1/Itpkb/Axl/Shb/Il15/Tgfbr2/Rasgrp1/Prkdc	17
BP	GO:0030324	lung development	24/997	259/28928	0.0926641	2.68865	5.15751	1.22924e-05	0.000131103	7.70825e-05	Rdh10/Errfi1/Ada/Crispld2/Spry2/Fgfr1/Fgf2/Foxf1/Stk40/Pdpn/Spry1/Tgfbr2/Yap1/Fgfr4/Tnrc6c/Slc7a11/Tnc/Lif/Sox9/Lox/Gata4/Mmp12/Id1/Hmga1	24
BP	GO:0007369	gastrulation	21/997	209/28928	0.100478	2.91539	5.25051	1.25132e-05	0.00013279	7.80741e-05	Itga5/Nr4a3/Lama3/Ets2/Dusp5/Il10/Fgfr1/Il1rn/Dusp4/Epha2/Foxf1/Dusp1/Tasor/Tnfaip3/Gja1/Mmp8/Tgfbr2/Tnrc6c/Osr1/Gata4/Osr2	21
BP	GO:0002279	mast cell activation involved in immune response	11/997	65/28928	0.169231	4.91024	5.96273	1.25695e-05	0.00013279	7.80741e-05	Hmox1/Lilrb4a/Nr4a3/Il4ra/D6Wsu163e/Foxf1/Gab2/Rabgef1/Pld2/Rasgrp1/Fcer1g	11
BP	GO:0006692	prostanoid metabolic process	11/997	65/28928	0.169231	4.91024	5.96273	1.25695e-05	0.00013279	7.80741e-05	Sphk1/Ptgs1/Anxa1/Ptges/Ptgs2/Pdpn/Avpr1a/Il1b/Edn1/Ptgr1/Ces2a	11
BP	GO:0001935	endothelial cell proliferation	19/997	177/28928	0.107345	3.11461	5.33146	1.25717e-05	0.00013279	7.80741e-05	Thbs1/Hmox1/Ccl2/Il10/Fgfr1/Nr4a1/Nrarp/Pgf/Epha2/Fgf2/F3/Rgcc/Eng/Flt1/Ccl11/Gja1/Nr2f2/Ecm1/Vip	19
BP	GO:1903034	regulation of response to wounding	19/997	177/28928	0.107345	3.11461	5.33146	1.25717e-05	0.00013279	7.80741e-05	Thbs1/Tnfrsf12a/Ccl2/Nrg1/Plat/S100a9/Plaur/Epha4/Il10/Hif1a/Thbd/Fgf2/Anxa1/F2r/Serpine1/Ndel1/Plau/Clec7a/Fermt2	19
BP	GO:0043583	ear development	25/997	277/28928	0.0902527	2.61869	5.11433	1.28666e-05	0.000135643	7.97518e-05	Cebpd/Nr4a3/Rdh10/Bcl2l11/Spry2/Myc/Fzd2/Epha4/Fgfr1/Fgf2/Sdc4/Tbx3/Aldh1a3/Bcr/Ece1/Slitrk6/Edn1/Maf/Insig2/Cytl1/Gsdme/Sox9/Osr1/Osr2/Ifi204	25
BP	GO:1901873	regulation of post-translational protein modification	24/997	260/28928	0.0923077	2.67831	5.1359	1.31091e-05	0.000137898	8.10777e-05	Sphk1/Trib1/Spry2/Egr1/Hspa1b/Fam107a/Hif1a/Prkcg/Gclc/Sqstm1/Dcun1d2/Skp2/Ogt/Cdc20/Bag2/Tnfaip3/Rasd2/Cblb/Inava/Tspo/Dtx3l/Arrdc3/Zc3h12a/Herpud1	24
BP	GO:0003073	regulation of systemic arterial blood pressure	16/997	132/28928	0.121212	3.51698	5.4759	1.31522e-05	0.000137898	8.10777e-05	Ier3/Calca/Adm/Eng/Ece1/F2r/Ptpn1/Tacr1/Avpr1a/Edn1/Bbs4/Gja1/Nr2f2/Ednrb/Adrb2/Tac1	16
BP	GO:0071456	cellular response to hypoxia	18/997	162/28928	0.111111	3.22389	5.36275	1.31559e-05	0.000137898	8.10777e-05	Stc1/Myc/Epha4/Adam8/Hif1a/Cysltr1/Plk3/Hilpda/Ptgs2/Rgcc/Ptpn1/Ptprd/Lmna/Ogt/Ndrg1/Edn1/Stc2/Adrb2	18
BP	GO:0008643	carbohydrate transport	17/997	147/28928	0.115646	3.35548	5.4093	1.33915e-05	0.0001401	8.23721e-05	Nr4a3/Stxbp4/Myc/Aqp7/Slc2a1/Slc5a3/Il1b/Crebl2/Edn1/Slc23a2/Oga/Irs2/Mfsd2a/Slc5a4b/Slc27a1/Slc2a3/Fgf15	17
BP	GO:0032370	positive regulation of lipid transport	14/997	104/28928	0.134615	3.90587	5.60883	1.35654e-05	0.000141649	8.32827e-05	Nfkbia/Dab2/Ptch1/Lrat/Runx1/Ptges/Il1a/Myb/Il1b/Edn1/Ldlrap1/Atp8a1/Gal/Tac1	14
BP	GO:0030879	mammary gland development	19/997	178/28928	0.106742	3.09711	5.30235	1.3627e-05	0.000142021	8.35018e-05	Areg/Ccl2/Bcl2l11/Ptch1/Csf1/Hif1a/Epha2/Fgf2/Foxf1/Tbx3/Ccl11/Cebpb/Prlr/Tph1/Gja1/Tgfbr2/Irs2/Sox9/Hoxb9	19
BP	GO:0050792	regulation of viral process	20/997	194/28928	0.103093	2.99124	5.25754	1.37039e-05	0.000142552	8.38136e-05	Ch25h/Ifi207/Trim30d/Trim8/Ifitm1/Axl/Nr5a2/Hexim1/Trim12c/Vps37b/Plscr1/Tasor/Ifitm6/Ifi213/Ppara/Trim34b/Mavs/Trim6/Sp100/Oasl2	20
BP	GO:0035265	organ growth	22/997	227/28928	0.0969163	2.81203	5.17829	1.39051e-05	0.00014437	8.4883e-05	Thbs1/Nrg1/Stc1/Bcl2l11/Spry2/Fgfr1/Fgf2/Tgfbr3/Rgs4/Prlr/Edn1/Gja1/Tgfbr2/Por/Yap1/S1pr1/Ppara/Pim1/Meis1/Sox9/Ecm1/Gata4	22
BP	GO:0097192	extrinsic apoptotic signaling pathway in absence of ligand	12/997	78/28928	0.153846	4.46385	5.78749	1.40644e-05	0.000145748	8.56933e-05	Nrg1/Bcl2l11/Lcn2/Hspa1b/Fgfr1/Il1a/Gdnf/Il1b/Bcl2a1a/Bag3/Bcl2a1d/Bcl2a1b	12
BP	GO:0010951	negative regulation of endopeptidase activity	18/997	163/28928	0.110429	3.20412	5.33153	1.43204e-05	0.000148122	8.70886e-05	Thbs1/Ifi207/Cd44/Plaur/Hspa1b/Nr4a1/Serpina3n/Timp3/Naip6/Serpina3f/Ptgs2/Cryab/Timp1/Serpina3m/Ifi213/Serpine1/Bcl2a1d/Serpina3c	18
BP	GO:0032964	collagen biosynthetic process	11/997	66/28928	0.166667	4.83584	5.89421	1.46176e-05	0.000150628	8.85619e-05	Ccl2/Errfi1/Il6/Vim/Rgcc/Eng/Myb/F2r/Adamts3/Serpine1/Tram2	11
BP	GO:0045620	negative regulation of lymphocyte differentiation	11/997	66/28928	0.166667	4.83584	5.89421	1.46176e-05	0.000150628	8.85619e-05	Lilrb4b/Lilrb4a/Hspb1/Ctla4/Il4ra/Cd44/Nrarp/Runx1/Anxa1/Pf4/Zc3h12a	11
BP	GO:0030323	respiratory tube development	24/997	262/28928	0.0916031	2.65787	5.09299	1.48917e-05	0.000153163	9.00528e-05	Rdh10/Errfi1/Ada/Crispld2/Spry2/Fgfr1/Fgf2/Foxf1/Stk40/Pdpn/Spry1/Tgfbr2/Yap1/Fgfr4/Tnrc6c/Slc7a11/Tnc/Lif/Sox9/Lox/Gata4/Mmp12/Id1/Hmga1	24
BP	GO:0032570	response to progesterone	9/997	44/28928	0.204545	5.9349	6.18916	1.58347e-05	0.000162558	9.55764e-05	Fosb/Ccl2/Errfi1/Fosl1/Tacr1/Acod1/Yap1/Tspo/Abhd2	9
BP	GO:0045669	positive regulation of osteoblast differentiation	12/997	79/28928	0.151899	4.40735	5.72955	1.60685e-05	0.000164649	9.68061e-05	Cebpd/Il6/Ccn1/Fgf2/Ifitm1/Lmna/Cebpb/Jund/Yap1/Tmem119/Fermt2/Ifi204	12
BP	GO:0032526	response to retinoic acid	15/997	120/28928	0.125	3.62688	5.44792	1.67682e-05	0.000171498	0.000100833	Ccl2/Abl2/Ptch1/Lrat/Runx1/Hsd17b2/Gja1/Acer2/Yap1/Tnc/Sox9/Osr1/Sp100/Gata4/Gjb3	15
BP	GO:0033077	T cell differentiation in thymus	14/997	106/28928	0.132075	3.83218	5.51909	1.69222e-05	0.000172383	0.000101353	Abl2/Ada/Mpzl2/Lig4/Ripk3/Adam8/Bcl11b/Itpkb/Il1a/Il1b/Rorc/Tnfrsf9/Rasgrp1/Prkdc	14
BP	GO:1900180	regulation of protein localization to nucleus	18/997	165/28928	0.109091	3.16528	5.2698	1.69296e-05	0.000172383	0.000101353	Lilrb4b/Lilrb4a/Il6/Glul/Trim8/Ptgs2/Mfhas1/Lmna/Ogt/Edn1/Yap1/Bag3/Dtx3l/Mavs/Chp2/Zc3h12a/Sin3a/Fermt2	18
BP	GO:0002820	negative regulation of adaptive immune response	11/997	67/28928	0.164179	4.76366	5.82705	1.6949e-05	0.000172383	0.000101353	Lilrb4b/Lilrb4a/Il4ra/Havcr2/Cd80/Il20rb/Cd160/Pf4/Fcgr2b/Zc3h12a/Il1rl1	11
BP	GO:0045670	regulation of osteoclast differentiation	13/997	93/28928	0.139785	4.05587	5.57663	1.81328e-05	0.000184082	0.000108231	Tnfaip6/Lilrb4b/Lilrb4a/Ccl3/Ccr1/Klf10/Csf1/Adam8/Tnfrsf11b/Ninj1/Cebpb/Tjp2/Traf6	13
BP	GO:0038034	signal transduction in absence of ligand	12/997	80/28928	0.15	4.35226	5.67258	1.83173e-05	0.000185268	0.000108929	Nrg1/Bcl2l11/Lcn2/Hspa1b/Fgfr1/Il1a/Gdnf/Il1b/Bcl2a1a/Bag3/Bcl2a1d/Bcl2a1b	12
BP	GO:0046635	positive regulation of alpha-beta T cell activation	12/997	80/28928	0.15	4.35226	5.67258	1.83173e-05	0.000185268	0.000108929	Lilrb4b/Lilrb4a/Il4ra/Il6/Ada/Runx1/Anxa1/Itpkb/Cd80/Shb/Cd160/Tgfbr2	12
BP	GO:0002645	positive regulation of tolerance induction	5/997	11/28928	0.454545	13.1887	7.63891	1.87029e-05	0.000188127	0.00011061	Lilrb4b/Lilrb4a/Irak3/Cblb/Tgfbr2	5
BP	GO:0002887	negative regulation of myeloid leukocyte mediated immunity	5/997	11/28928	0.454545	13.1887	7.63891	1.87029e-05	0.000188127	0.00011061	Hmox1/Foxf1/Cx3cr1/Rabgef1/Bcr	5
BP	GO:0031620	regulation of fever generation	5/997	11/28928	0.454545	13.1887	7.63891	1.87029e-05	0.000188127	0.00011061	Ptges/Ptgs2/Il1b/Ccr5/Ednrb	5
BP	GO:0043367	CD4-positive, alpha-beta T cell differentiation	14/997	107/28928	0.130841	3.79636	5.47503	1.886e-05	0.00018936	0.000111335	Il4ra/Il6/Gadd45g/Runx1/Anxa1/Myb/Irf4/Sema4a/Shb/Rorc/Pf4/Ctsl/Zc3h12a/Bcl3	14
BP	GO:0046638	positive regulation of alpha-beta T cell differentiation	10/997	56/28928	0.178571	5.18126	5.91723	1.90672e-05	0.000190742	0.000112147	Lilrb4b/Lilrb4a/Il4ra/Il6/Ada/Runx1/Anxa1/Itpkb/Shb/Tgfbr2	10
BP	GO:0140894	endolysosomal toll-like receptor signaling pathway	10/997	56/28928	0.178571	5.18126	5.91723	1.90672e-05	0.000190742	0.000112147	Havcr2/Tlr13/Rnf170/Tlr3/Cd86/Rab7b/Tnfaip3/Tnip2/Tlr8/Tirap	10
BP	GO:0042742	defense response to bacterium	32/997	413/28928	0.0774818	2.24814	4.82678	1.99959e-05	0.000199668	0.000117395	Adamts4/Cxcl5/Lcn2/Havcr2/Il10/Epha2/Ppl/S100a14/Naip6/Slc9a9/Adm/Trem1/Il1b/Clec4d/Cd160/Cebpb/Nos2/Gbp2b/C5ar1/Clec4e/Serpine1/Gbp8/Anxa3/Slc11a1/Mavs/Gbp2/Hp/Tirap/Fcer1g/Tac1/Vip/Bcl3	32
BP	GO:0042093	T-helper cell differentiation	12/997	81/28928	0.148148	4.29853	5.61653	2.08355e-05	0.000207673	0.000122102	Il4ra/Il6/Gadd45g/Anxa1/Myb/Irf4/Sema4a/Shb/Rorc/Pf4/Zc3h12a/Bcl3	12
BP	GO:0000082	G1/S transition of mitotic cell cycle	22/997	233/28928	0.0944206	2.73962	5.03715	2.08968e-05	0.000207906	0.000122239	Adamts1/Myc/Fam107a/Cenpj/Bcl7a/Anxa1/Plk3/Id4/Rgcc/Rb1/Ccne2/Plk2/Pdpn/Myb/Klf11/Prmt2/Skp2/Ctdsp1/Cables1/Lsm10/Sde2/Prkdc	22
BP	GO:0046887	positive regulation of hormone secretion	20/997	200/28928	0.1	2.9015	5.09819	2.14218e-05	0.000212743	0.000125083	Dab2/Ildr1/Hcar2/Fgfr1/Hif1a/Glul/Inhbb/Runx1/Lrrc8a/Myb/Tacr1/Edn1/Gja1/Acsl4/Fgfr4/Oga/Irs2/Lif/Gal/Tac1	20
BP	GO:0060644	mammary gland epithelial cell differentiation	6/997	18/28928	0.333333	9.67168	6.95299	2.14679e-05	0.000212815	0.000125125	Ptch1/Hif1a/Fgf2/Foxf1/Cebpb/Prlr	6
BP	GO:0031589	cell-substrate adhesion	30/997	377/28928	0.0795756	2.30889	4.83303	2.17957e-05	0.000215675	0.000126807	Thbs1/Itga5/Tnfrsf12a/Dab2/Bcl2l11/Gcnt2/Ccn1/Adamts9/Fam107a/Csf1/Adam8/Zyx/Sdc4/Foxf1/Ninj1/Spry4/Axl/Bcr/Pdpn/Ptpn1/Trem1/Acer2/Vcl/Serpine1/Plau/Abi3bp/Mmp12/St6gal1/Mertk/Fermt2	30
BP	GO:0001654	eye development	35/997	473/28928	0.0739958	2.14699	4.7519	2.20662e-05	0.000217959	0.000128149	Rdh10/Spry2/Adamts9/Sh3pxd2b/Clic4/Hif1a/Bcl11b/Mab21l2/Inhbb/Epha2/Fgf2/Rhoj/Ninj1/Vim/Aldh1a3/Per1/Flt1/Cryab/Slitrk6/Bbs4/Gja1/Spry1/Spred1/Tgfbr2/Meis2/Fjx1/Maf/Slc7a11/Mfsd2a/Meis1/Lif/Sox9/Osr2/Mertk/Slc25a25	35
BP	GO:0010332	response to gamma radiation	10/997	57/28928	0.175439	5.09036	5.84015	2.24153e-05	0.000221009	0.000129943	Ccl2/Cxcl2/Egr1/Myc/Lig4/Ccl7/Il1a/Cryab/Yap1/Prkdc	10
BP	GO:0050764	regulation of phagocytosis	15/997	123/28928	0.121951	3.53842	5.33013	2.25855e-05	0.000221564	0.000130269	Sphk1/Ccl2/Prkcg/Bcr/Fcgr3/Plscr1/Pot1b/Il15/Il2rb/Slc11a1/Fcgr2b/Clec7a/Mex3b/Fcer1g/Mertk	15
BP	GO:0043903	regulation of biological process involved in symbiotic interaction	11/997	69/28928	0.15942	4.62559	5.69663	2.25929e-05	0.000221564	0.000130269	Ch25h/Cxcl5/Cxcl1/Trim30d/Trim8/Ifitm1/Trim12c/Ifitm6/Ppara/Trim34b/Trim6	11
BP	GO:0051785	positive regulation of nuclear division	11/997	69/28928	0.15942	4.62559	5.69663	2.25929e-05	0.000221564	0.000130269	Sphk1/Ereg/Rgcc/Rb1/Il1a/Il1b/Edn1/Btc/Cdc20/Gja1/Prdm9	11
BP	GO:0051495	positive regulation of cytoskeleton organization	20/997	201/28928	0.0995025	2.88707	5.0722	2.30324e-05	0.000225264	0.000132444	Csf3/Icam1/Baiap2/Hspa1b/Hspa1a/Sh3pxd2b/Cenpj/Sdc4/Rgcc/Tacr1/Ccl11/Cdc42ep3/Edn1/Plek/Cracd/Cdc42ep2/Tac1/Id1/Fermt2/Myo1c	20
BP	GO:0032970	regulation of actin filament-based process	32/997	416/28928	0.0769231	2.23193	4.7816	2.30592e-05	0.000225264	0.000132444	Rnd1/Stc1/Rnd3/Csf3/Icam1/Baiap2/Fam107a/Sh3pxd2b/Sdc4/Rnh1/Pln/Rgcc/Pdpn/Il1a/Tacr1/Ccl11/Cdc42ep3/Ssh1/Rgs4/Edn1/Bbs4/Gja1/Plek/Cracd/Hcn4/S1pr1/Cdc42ep2/Tac1/Gata4/Id1/Fermt2/Myo1c	32
BP	GO:0002701	negative regulation of production of molecular mediator of immune response	9/997	46/28928	0.195652	5.67686	5.99757	2.31345e-05	0.000225264	0.000132444	Lilrb4b/Hmox1/Lilrb4a/Il10/Irak3/Axl/Rabgef1/Fcgr2b/Prkdc	9
BP	GO:0050691	regulation of defense response to virus by host	9/997	46/28928	0.195652	5.67686	5.99757	2.31345e-05	0.000225264	0.000132444	Il1b/Il15/Sting1/Dtx3l/Mavs/Trim6/Zc3h12a/Mmp12/Sin3a	9
BP	GO:0002294	CD4-positive, alpha-beta T cell differentiation involved in immune response	12/997	82/28928	0.146341	4.2461	5.56138	2.365e-05	0.000228659	0.000134441	Il4ra/Il6/Gadd45g/Anxa1/Myb/Irf4/Sema4a/Shb/Rorc/Pf4/Zc3h12a/Bcl3	12
BP	GO:0002704	negative regulation of leukocyte mediated immunity	12/997	82/28928	0.146341	4.2461	5.56138	2.365e-05	0.000228659	0.000134441	Lilrb4b/Hmox1/Lilrb4a/Havcr2/Foxf1/Cx3cr1/Cd80/Rabgef1/Bcr/Il20rb/Fcgr2b/Klrb1b	12
BP	GO:0042130	negative regulation of T cell proliferation	12/997	82/28928	0.146341	4.2461	5.56138	2.365e-05	0.000228659	0.000134441	Lilrb4b/Lilrb4a/Ctla4/Havcr2/Cd44/Sdc4/Cd80/Il20rb/Cd86/Lrrc32/Cebpb/Cblb	12
BP	GO:0046637	regulation of alpha-beta T cell differentiation	12/997	82/28928	0.146341	4.2461	5.56138	2.365e-05	0.000228659	0.000134441	Lilrb4b/Lilrb4a/Il4ra/Il6/Ada/Runx1/Anxa1/Itpkb/Shb/Pf4/Tgfbr2/Zc3h12a	12
BP	GO:0010810	regulation of cell-substrate adhesion	22/997	235/28928	0.093617	2.7163	4.99109	2.38502e-05	0.000230188	0.00013534	Thbs1/Itga5/Dab2/Gcnt2/Ccn1/Fam107a/Csf1/Sdc4/Foxf1/Ninj1/Spry4/Pdpn/Ptpn1/Trem1/Acer2/Vcl/Serpine1/Plau/Abi3bp/Mmp12/St6gal1/Fermt2	22
BP	GO:0045927	positive regulation of growth	27/997	324/28928	0.0833333	2.41792	4.84917	2.47985e-05	0.000238205	0.000140053	Tnfrsf12a/Sphk1/Nrg1/Sema7a/Csf1/Fgfr1/Sh3pxd2b/Fgf2/Map3k13/Tgfbr3/Avpr1a/Cxcl16/Agrn/Edn1/Bbs4/Sfn/Yap1/Acsl4/Serpine1/Slc23a2/Ndel1/Pim1/Mfsd2a/Bcl11a/Adrb2/Gata4/Prkdc	27
BP	GO:0043537	negative regulation of blood vessel endothelial cell migration	8/997	36/28928	0.222222	6.44779	6.17929	2.48112e-05	0.000238205	0.000140053	Thbs1/Fgf2/Robo4/Rgcc/Stard13/Spred1/Gadd45a/Meox2	8
BP	GO:0045987	positive regulation of smooth muscle contraction	8/997	36/28928	0.222222	6.44779	6.17929	2.48112e-05	0.000238205	0.000140053	Sphk1/Ada/Ptgs1/Ptgs2/F2r/Tacr1/Ptafr/Edn1	8
BP	GO:0150063	visual system development	35/997	476/28928	0.0735294	2.13346	4.71096	2.51617e-05	0.000241148	0.000141784	Rdh10/Spry2/Adamts9/Sh3pxd2b/Clic4/Hif1a/Bcl11b/Mab21l2/Inhbb/Epha2/Fgf2/Rhoj/Ninj1/Vim/Aldh1a3/Per1/Flt1/Cryab/Slitrk6/Bbs4/Gja1/Spry1/Spred1/Tgfbr2/Meis2/Fjx1/Maf/Slc7a11/Mfsd2a/Meis1/Lif/Sox9/Osr2/Mertk/Slc25a25	35
BP	GO:0021700	developmental maturation	32/997	418/28928	0.076555	2.22125	4.7517	2.53328e-05	0.000242363	0.000142498	Rnd1/Abl2/Sema7a/Ereg/Fgfr1/Hif1a/Runx1/Cx3cr1/Cdh5/Axl/Ptgs2/Calca/Rb1/Map3k13/Nr4a2/Rfx3/Bhlha15/Shb/Il15/Edn1/Cdc20/Gja1/Nemp1/Ctsl/S1pr1/Zbtb16/Lyl1/Ednrb/Clec7a/Bcl11a/Gal/Abhd2	32
BP	GO:0014910	regulation of smooth muscle cell migration	14/997	110/28928	0.127273	3.69282	5.34599	2.58956e-05	0.000247316	0.00014541	Adamts1/Nr4a3/Trib1/Egr1/Myc/F3/Ptpn1/Tacr1/Ssh1/Sema6d/Serpine1/Plau/Igfbp3/Abhd2	14
BP	GO:0002293	alpha-beta T cell differentiation involved in immune response	12/997	83/28928	0.144578	4.19495	5.50711	2.67896e-05	0.00025541	0.000150169	Il4ra/Il6/Gadd45g/Anxa1/Myb/Irf4/Sema4a/Shb/Rorc/Pf4/Zc3h12a/Bcl3	12
BP	GO:1905039	carboxylic acid transmembrane transport	17/997	155/28928	0.109677	3.1823	5.14687	2.68471e-05	0.000255513	0.00015023	Thbs1/Emb/Myc/Slc7a1/Abcc1/Slc2a1/Gfap/Lrrc8a/Slc16a6/Rgs4/Slc23a2/Slc11a1/Irs2/Slc7a5/Slc7a11/Slc38a9/Slc27a1	17
BP	GO:0048639	positive regulation of developmental growth	21/997	220/28928	0.0954545	2.76962	4.97789	2.71539e-05	0.000257986	0.000151684	Tnfrsf12a/Nrg1/Sema7a/Csf1/Fgfr1/Sh3pxd2b/Fgf2/Map3k13/Tgfbr3/Agrn/Edn1/Bbs4/Yap1/Serpine1/Slc23a2/Ndel1/Pim1/Bcl11a/Adrb2/Gata4/Prkdc	21
BP	GO:0032753	positive regulation of interleukin-4 production	7/997	27/28928	0.259259	7.52242	6.40605	2.74339e-05	0.000258851	0.000152192	Havcr2/Il20rb/Irf4/Cebpb/Icosl/Slc7a5/Fcer1g	7
BP	GO:0090026	positive regulation of monocyte chemotaxis	7/997	27/28928	0.259259	7.52242	6.40605	2.74339e-05	0.000258851	0.000152192	Ccl2/Ccr1/S100a14/Cx3cr1/Serpine1/Cxcl10/Pla2g7	7
BP	GO:0097396	response to interleukin-17	7/997	27/28928	0.259259	7.52242	6.40605	2.74339e-05	0.000258851	0.000152192	Il6/Socs3/Cxcl1/Il1b/Cxcl10/Il17ra/Traf6	7
BP	GO:1904996	positive regulation of leukocyte adhesion to vascular endothelial cell	7/997	27/28928	0.259259	7.52242	6.40605	2.74339e-05	0.000258851	0.000152192	Selp/Il6/Icam1/Sele/Ptafr/Gcnt1/Traf6	7
BP	GO:0007266	Rho protein signal transduction	16/997	140/28928	0.114286	3.31601	5.18984	2.76085e-05	0.000260051	0.000152898	Abl2/Gpr4/Baiap2/Prag1/Rhoj/Bcr/Pdpn/F2r/Ctnnal1/Stard13/Cdc42ep3/Adgrg1/Dock8/Eps8l3/Cdc42ep2/Kctd10	16
BP	GO:0009267	cellular response to starvation	20/997	204/28928	0.0980392	2.84461	4.99521	2.85357e-05	0.000268324	0.000157762	Nuak2/Rnf152/Klf10/Ifi207/Glul/Inhbb/Slc2a1/Zfyve1/Plin2/Bhlha15/Pdk4/Pmaip1/Ctsl/Ifi213/Ppara/Gabarapl1/Angptl4/Slc7a5/Mfsd2a/Zc3h12a	20
BP	GO:0048708	astrocyte differentiation	13/997	97/28928	0.134021	3.88861	5.38396	2.86871e-05	0.000269285	0.000158327	S100a8/Abl2/S100a9/Epha4/Abcc1/Vim/Id4/Gfap/Sox6/Il1b/C5ar1/Lif/Sox9	13
BP	GO:0043524	negative regulation of neuron apoptotic process	21/997	221/28928	0.0950226	2.75709	4.95395	2.90498e-05	0.000272224	0.000160055	Hmox1/Nr4a3/Il6/Lcn2/Epha4/Il10/Lig4/Adam8/Hif1a/Fgf2/Prkcg/Ntf3/Cx3cr1/Axl/Gdnf/F2r/Nr4a2/Gclc/Mt1/Cebpb/C5ar1	21
BP	GO:0032720	negative regulation of tumor necrosis factor production	11/997	71/28928	0.15493	4.49529	5.57112	2.97928e-05	0.000278711	0.000163869	Lilrb4b/Lilrb4a/Errfi1/Havcr2/Il10/Irak3/Axl/Tnfaip3/Tspo/Zc3h12a/Bcl3	11
BP	GO:0002287	alpha-beta T cell activation involved in immune response	12/997	84/28928	0.142857	4.14501	5.45368	3.02852e-05	0.000282834	0.000166293	Il4ra/Il6/Gadd45g/Anxa1/Myb/Irf4/Sema4a/Shb/Rorc/Pf4/Zc3h12a/Bcl3	12
BP	GO:0002724	regulation of T cell cytokine production	8/997	37/28928	0.216216	6.27352	6.06424	3.07039e-05	0.000285771	0.00016802	Lilrb4b/Lilrb4a/Il6/Tnfrsf1b/Il1r1/Arid5a/Il1b/Traf6	8
BP	GO:0043304	regulation of mast cell degranulation	8/997	37/28928	0.216216	6.27352	6.06424	3.07039e-05	0.000285771	0.00016802	Hmox1/Il4ra/D6Wsu163e/Foxf1/Gab2/Rabgef1/Pld2/Fcer1g	8
BP	GO:0010038	response to metal ion	30/997	384/28928	0.078125	2.2668	4.72142	3.07857e-05	0.000286046	0.000168182	Fosb/Thbs1/Hmox1/Mt2/Cd14/Lig4/Clic4/Hif1a/Junb/Tnfrsf11b/Inhbb/Cpne8/S100a16/Itpkb/Ptgs2/Pln/Cyp2r1/Il1a/Itpkc/Gclc/Zfp616/Plscr1/Mt1/Edn1/Jund/Slc30a2/Tspo/Slc11a1/Chp2/Slc30a10	30
BP	GO:0015911	long-chain fatty acid import across plasma membrane	5/997	12/28928	0.416667	12.0896	7.25928	3.11502e-05	0.000288943	0.000169885	Thbs1/Abcc1/Slc2a1/Irs2/Slc27a1	5
BP	GO:0048562	embryonic organ morphogenesis	28/997	347/28928	0.0806916	2.34127	4.74896	3.1595e-05	0.000292574	0.000172019	Nr4a3/Rdh10/Spry2/Myc/Fzd2/Fgfr1/Hif1a/Epha2/Foxf1/Tbx3/Aldh1a3/Bcr/Asb2/Eng/Hoxb6/Ndst1/Slitrk6/Edn1/Gja1/Mdfi/Tgfbr2/Yap1/Insig2/Sox9/Hoxb9/Osr1/Gata4/Osr2	28
BP	GO:0043010	camera-type eye development	32/997	423/28928	0.0756501	2.19499	4.67768	3.19368e-05	0.000295241	0.000173588	Rdh10/Spry2/Adamts9/Clic4/Hif1a/Bcl11b/Mab21l2/Epha2/Fgf2/Rhoj/Ninj1/Vim/Aldh1a3/Per1/Flt1/Cryab/Slitrk6/Bbs4/Gja1/Spry1/Spred1/Tgfbr2/Fjx1/Maf/Slc7a11/Mfsd2a/Meis1/Lif/Sox9/Osr2/Mertk/Slc25a25	32
BP	GO:0072073	kidney epithelium development	18/997	173/28928	0.104046	3.01891	5.03198	3.21357e-05	0.000296579	0.000174375	Ptch1/Cd44/Myc/Epha4/Fgfr1/Epha7/Pgf/Fgf2/Sdc4/Gdnf/Edn1/Cxcr2/Spry1/Yap1/Ednrb/Lif/Sox9/Osr1	18
BP	GO:0006936	muscle contraction	27/997	329/28928	0.0820669	2.38117	4.76022	3.24173e-05	0.000298675	0.000175607	Sphk1/Kcne4/Stc1/Ada/Nr4a1/Gucy1a1/Kcne3/Ptgs1/Tbx3/Ptgs2/Pln/Calca/Gdnf/F2r/Flt1/Tacr1/Map2k3/Ptafr/Agrn/Edn1/Bdkrb2/Hcn4/Ednrb/Adrb2/Zc3h12a/Scn3b/Gata4	27
BP	GO:0044403	biological process involved in symbiotic interaction	24/997	275/28928	0.0872727	2.53222	4.82346	3.2898e-05	0.000302596	0.000177912	Ch25h/Cxcl5/Ccl3/Bcl2l11/Cxcl1/Icam1/Trim30d/Trim8/Slc7a1/Ifitm1/Cx3cr1/Axl/Trim12c/Zfyve1/Vps37b/Trem1/Gbp2b/Ifitm6/Ppara/Trim34b/Trim6/Gbp2/Zc3h12a/Napepld	24
BP	GO:0019218	regulation of steroid metabolic process	15/997	127/28928	0.11811	3.42697	5.17868	3.30789e-05	0.000303249	0.000178296	Ch25h/Dab2/Egr1/Gpr146/Il1a/Rorc/H6pd/Por/Tspo/Fgfr4/Sec14l2/Insig2/Gal/Dgat2/Fgf15	15
BP	GO:0050919	negative chemotaxis	9/997	48/28928	0.1875	5.44032	5.81691	3.31097e-05	0.000303249	0.000178296	Nrg1/Sema7a/Epha7/Sema6a/Sema6b/Sema4a/Sema4c/Sema6d/Flrt2	9
BP	GO:0060541	respiratory system development	25/997	293/28928	0.0853242	2.47569	4.79662	3.3135e-05	0.000303249	0.000178296	Rdh10/Errfi1/Ada/Crispld2/Spry2/Fgfr1/Fgf2/Foxf1/Aldh1a3/Stk40/Pdpn/Spry1/Tgfbr2/Yap1/Fgfr4/Tnrc6c/Slc7a11/Tnc/Lif/Sox9/Lox/Gata4/Mmp12/Id1/Hmga1	25
BP	GO:0048880	sensory system development	35/997	483/28928	0.0724638	2.10254	4.61658	3.39839e-05	0.0003105	0.000182559	Rdh10/Spry2/Adamts9/Sh3pxd2b/Clic4/Hif1a/Bcl11b/Mab21l2/Inhbb/Epha2/Fgf2/Rhoj/Ninj1/Vim/Aldh1a3/Per1/Flt1/Cryab/Slitrk6/Bbs4/Gja1/Spry1/Spred1/Tgfbr2/Meis2/Fjx1/Maf/Slc7a11/Mfsd2a/Meis1/Lif/Sox9/Osr2/Mertk/Slc25a25	35
BP	GO:0072678	T cell migration	11/997	72/28928	0.152778	4.43285	5.5101	3.40811e-05	0.000310869	0.000182777	Ccl2/Ccl3/Abl2/Icam1/Ripk3/Adam8/Cxcl16/Dock8/S1pr1/Cxcl10/Ecm1	11
BP	GO:0007411	axon guidance	23/997	258/28928	0.0891473	2.58661	4.83641	3.41967e-05	0.000311406	0.000183092	Nr4a3/Emb/Lama3/Sema7a/Ptch1/Klf7/Epha4/Epha7/Bcl11b/Sema6a/Sema6b/Ntf3/Tubb2b/Egr2/Ece1/Gdnf/Sema4a/Lamc2/Sema4c/Agrn/Edn1/Sema6d/Flrt2	23
BP	GO:0010212	response to ionizing radiation	17/997	158/28928	0.107595	3.12187	5.05282	3.43884e-05	0.000311599	0.000183205	Ccl2/Cxcl2/Ifi207/Egr1/Myc/Lig4/Thbd/Ccl7/Cyp2r1/Il1a/Cryab/Pmaip1/Yap1/Nek1/Ifi213/Gadd45a/Prkdc	17
BP	GO:0043547	positive regulation of GTPase activity	17/997	158/28928	0.107595	3.12187	5.05282	3.43884e-05	0.000311599	0.000183205	Rgs16/Epha2/Snx13/Ntf3/Bcr/F2r/Rgs1/Rapgef2/Ccl11/Dock8/Agrn/Snx18/Ndel1/Rasgrp1/Chn2/Mex3b/Fermt2	17
BP	GO:1903825	organic acid transmembrane transport	17/997	158/28928	0.107595	3.12187	5.05282	3.43884e-05	0.000311599	0.000183205	Thbs1/Emb/Myc/Slc7a1/Abcc1/Slc2a1/Gfap/Lrrc8a/Slc16a6/Rgs4/Slc23a2/Slc11a1/Irs2/Slc7a5/Slc7a11/Slc38a9/Slc27a1	17
BP	GO:0032740	positive regulation of interleukin-17 production	7/997	28/28928	0.25	7.25376	6.255	3.54935e-05	0.000321082	0.000188781	Sphk1/Il6/Ccn1/Arid5a/Il15/Slc7a5/Osm	7
BP	GO:0030857	negative regulation of epithelial cell differentiation	10/997	60/28928	0.166667	4.83584	5.61932	3.56481e-05	0.000321948	0.000189291	Spry2/Tbx3/Il1a/Spry1/Spred1/Yap1/S1pr3/Sox9/Osr1/Id1	10
BP	GO:0030282	bone mineralization	16/997	143/28928	0.111888	3.24644	5.08786	3.59017e-05	0.000323174	0.000190011	Sbno2/Ccr1/Klf10/Ccn1/Hif1a/Axin2/Ptgs2/Gja1/S1pr1/Tmem119/Adrb2/Sox9/Osr1/Ecm1/Lox/Osr2	16
BP	GO:0034219	carbohydrate transmembrane transport	16/997	143/28928	0.111888	3.24644	5.08786	3.59017e-05	0.000323174	0.000190011	Nr4a3/Stxbp4/Myc/Aqp7/Slc2a1/Slc5a3/Il1b/Crebl2/Edn1/Slc23a2/Oga/Irs2/Slc5a4b/Slc27a1/Slc2a3/Fgf15	16
BP	GO:0038127	ERBB signaling pathway	15/997	128/28928	0.117188	3.4002	5.14177	3.62938e-05	0.000325972	0.000191656	Areg/Nrg1/Errfi1/Abl2/Spry2/Plaur/Ereg/Fam83b/Rhbdf1/Gprc5a/Ptprr/Btc/Cblb/Sox9/Slc30a10	15
BP	GO:0097485	neuron projection guidance	23/997	259/28928	0.0888031	2.57663	4.81535	3.63314e-05	0.000325972	0.000191656	Nr4a3/Emb/Lama3/Sema7a/Ptch1/Klf7/Epha4/Epha7/Bcl11b/Sema6a/Sema6b/Ntf3/Tubb2b/Egr2/Ece1/Gdnf/Sema4a/Lamc2/Sema4c/Agrn/Edn1/Sema6d/Flrt2	23
BP	GO:0010466	negative regulation of peptidase activity	22/997	242/28928	0.0909091	2.63773	4.83361	3.73743e-05	0.000334781	0.000196836	Thbs1/Ifi207/Cd44/Plaur/Hspa1b/Nr4a1/Serpina3n/Timp3/Naip6/Serpina3f/Ptgs2/Cryab/Timp1/Cstb/Serpina3m/Ifi213/Serpine1/Bcl2a1d/Ecm1/Pi15/Serpina3c/Stfa2l1	22
BP	GO:0030072	peptide hormone secretion	27/997	332/28928	0.0813253	2.35966	4.70763	3.79472e-05	0.000339358	0.000199527	Il6/Stxbp4/Ildr1/Klf7/Il1rn/Hif1a/Ccn3/Glul/Inhbb/Anxa1/Lrrc8a/Rfx3/Pim3/Il1b/Nos2/Edn1/Gja1/Cpt1a/Acvr1c/Acsl4/Oga/Irs2/Lif/Fam3b/Midn/Vip/Hmga1	27
BP	GO:0002437	inflammatory response to antigenic stimulus	12/997	86/28928	0.139535	4.04861	5.34927	3.84803e-05	0.00034245	0.000201344	Lilrb4a/Icam1/Il10/Il1rn/Cysltr1/Il20rb/Fcgr3/Bdkrb2/Cxcr2/Fcgr2b/Rasgrp1/Fcer1g	12
BP	GO:0032722	positive regulation of chemokine production	12/997	86/28928	0.139535	4.04861	5.34927	3.84803e-05	0.00034245	0.000201344	Il4ra/Il6/Havcr2/Egr1/Ccn1/Tlr3/Il1b/Mavs/Clec7a/Tirap/Il1rl1/Il17ra	12
BP	GO:0055021	regulation of cardiac muscle tissue growth	12/997	86/28928	0.139535	4.04861	5.34927	3.84803e-05	0.00034245	0.000201344	Nrg1/Fgfr1/Fgf2/Tgfbr3/Rgs4/Edn1/Gja1/Tgfbr2/Yap1/Ppara/Pim1/Gata4	12
BP	GO:0006814	sodium ion transport	23/997	260/28928	0.0884615	2.56672	4.7944	3.85851e-05	0.000342826	0.000201565	Sik1/Slc10a6/Cxcl1/Kcne3/Kcnk1/Slc9a9/Per1/Slc5a3/Fgf11/Agrn/Edn1/Slc4a4/Hcn4/Slc13a1/Slc23a2/Ednrb/Chp2/Adrb2/Slc34a2/Osr1/Slc5a4b/Scn3b/Slc10a5	23
BP	GO:1903556	negative regulation of tumor necrosis factor superfamily cytokine production	11/997	73/28928	0.150685	4.37213	5.45019	3.88908e-05	0.000344983	0.000202834	Lilrb4b/Lilrb4a/Errfi1/Havcr2/Il10/Irak3/Axl/Tnfaip3/Tspo/Zc3h12a/Bcl3	11
BP	GO:0010959	regulation of metal ion transport	33/997	447/28928	0.0738255	2.14205	4.59745	3.92171e-05	0.000347174	0.000204122	Sik1/Gem/Ccl3/Kcne4/Ccr1/Stc1/Cxcl1/Icam1/Lcn2/Kcne3/Trpv3/Bdkrb1/Gpr35/Ptgs2/Pln/Per1/F2r/Ppp3cc/Rgs4/Fgf11/Agrn/Gja1/Serpine1/Tspo/Stc2/Cxcl10/Oga/Hspa2/Adrb2/Osr1/Gal/Scn3b/Vip	33
BP	GO:0045840	positive regulation of mitotic nuclear division	9/997	49/28928	0.183673	5.32929	5.73034	3.93278e-05	0.000347174	0.000204122	Sphk1/Ereg/Rgcc/Rb1/Il1a/Il1b/Edn1/Btc/Cdc20	9
BP	GO:1903524	positive regulation of blood circulation	9/997	49/28928	0.183673	5.32929	5.73034	3.93278e-05	0.000347174	0.000204122	Ada/Dusp5/Adm/Ptpn1/Avpr1a/Rgs4/Edn1/Adrb2/Scn3b	9
BP	GO:0043393	regulation of protein binding	19/997	192/28928	0.0989583	2.87128	4.9151	3.94186e-05	0.000347416	0.000204264	Errfi1/Abl2/Dab2/Myc/Il10/Ip6k2/Plscr1/Rapgef2/Agrn/Bag2/Ldlrap1/Sting1/Mitd1/Cblb/Fam220a/Dtx3l/Phlda2/Mavs/Lox	19
BP	GO:0072330	monocarboxylic acid biosynthetic process	21/997	226/28928	0.0929204	2.69609	4.83618	4.04272e-05	0.000355733	0.000209154	Sphk1/Rdh10/Errfi1/Ptgs1/Scd2/Anxa1/Aldh1a3/Ptges/Ptgs2/Avpr1a/Il1b/Pdk4/Edn1/Slc27a2/Aloxe3/Hacd4/Fgfr4/Prkab2/Insig2/Abhd2/Fgf15	21
BP	GO:0015850	organic hydroxy compound transport	26/997	315/28928	0.0825397	2.39489	4.70295	4.09007e-05	0.000359298	0.00021125	Emb/Nrg1/Slc10a6/Nfkbia/Dab2/Ptch1/Myc/Ptgs1/Aqp7/Myb/Gdnf/Fcgr3/Slc5a3/Entpd1/Gramd1a/Ldlrap1/Tspo/Npc1l1/Gal/Igfbp3/Fcer1g/Tac1/Flvcr2/Vip/Slc10a5/Fgf15	26
BP	GO:0009913	epidermal cell differentiation	23/997	261/28928	0.0881226	2.55688	4.77354	4.09634e-05	0.000359298	0.00021125	Maff/Errfi1/Ptch1/Klf7/Fgfr1/Clic4/Bcl11b/Epha2/Ppl/Fgf2/Ptgs1/Anxa1/Ptgs2/Bcr/Ovol1/Il1a/Sprr2h/Flnb/Slitrk6/Sfn/Yap1/Gsdme/Stfa2l1	23
BP	GO:0043303	mast cell degranulation	10/997	61/28928	0.163934	4.75656	5.54895	4.13326e-05	0.000361958	0.000212814	Hmox1/Nr4a3/Il4ra/D6Wsu163e/Foxf1/Gab2/Rabgef1/Pld2/Rasgrp1/Fcer1g	10
BP	GO:0048863	stem cell differentiation	25/997	297/28928	0.0841751	2.44234	4.72047	4.1434e-05	0.000362266	0.000212996	Nrg1/Rdh10/Sema7a/Fgfr1/Hif1a/Sema6a/Fgf2/Sema6b/Tbx3/Gdnf/Kbtbd8/Sox6/Sema4a/Sema4c/Edn1/Sema6d/Tgfbr2/Yap1/Ednrb/Trim6/Lif/Sox9/Osr1/Prkdc/Fgf15	25
BP	GO:0044539	long-chain fatty acid import into cell	6/997	20/28928	0.3	8.70451	6.51189	4.22487e-05	0.000368215	0.000216493	Thbs1/Abcc1/Slc2a1/Slc27a2/Irs2/Slc27a1	6
BP	GO:2000846	regulation of corticosteroid hormone secretion	6/997	20/28928	0.3	8.70451	6.51189	4.22487e-05	0.000368215	0.000216493	Nrg1/Dab2/Tspo/Cry2/Gal/Tac1	6
BP	GO:0097696	cell surface receptor signaling pathway via STAT	19/997	193/28928	0.0984456	2.8564	4.88879	4.23367e-05	0.000368397	0.0002166	Cxcl5/Il6/Socs3/Cish/Il10/Cenpj/Csf2rb2/F2r/Prmt2/Csf2rb/Ptprd/Il15/Prlr/Parp14/Gadd45a/Stat2/Lif/Osm/Bcl3	19
BP	GO:0042310	vasoconstriction	14/997	115/28928	0.121739	3.53227	5.14067	4.28041e-05	0.000371285	0.000218298	Icam1/Dusp5/Hif1a/Ptgs1/Cysltr1/Ptgs2/Adm/F2r/Tacr1/Avpr1a/Edn1/Bdkrb2/Gja1/Ednrb	14
BP	GO:0070227	lymphocyte apoptotic process	14/997	115/28928	0.121739	3.53227	5.14067	4.28041e-05	0.000371285	0.000218298	Ada/Bcl2l11/Cd44/Myc/Il10/Ripk3/Adam8/Hif1a/Bcl11b/Dock8/Rorc/Bcl2a1a/Irs2/Bcl3	14
BP	GO:0006066	alcohol metabolic process	29/997	372/28928	0.077957	2.26193	4.6282	4.31067e-05	0.00037273	0.000219148	Ch25h/Sphk1/Rdh10/Errfi1/Akr1b8/Dab2/Fgfr1/Lrat/Ip6k2/Aldh1a3/Itpkb/Cyp2r1/Gpr146/Itpkc/Slc5a3/Ptafr/H6pd/Ldlrap1/Acer2/Plek/Por/Fgfr4/Sec14l2/Insig2/Ednrb/Npc1l1/Napepld/Dgat2/Ces2a	29
BP	GO:0051235	maintenance of location	29/997	372/28928	0.077957	2.26193	4.6282	4.31067e-05	0.00037273	0.000219148	Nrg1/Ccl3/Nfkbia/Fgf2/Bdkrb1/Hilpda/Pln/Zfyve1/Vps13c/F2r/Xcr1/Il1b/Plin2/Bbs4/Plch1/Gja1/Ccr5/Cpt1a/Cidec/Acvr1c/Itpr2/Ppara/Tspo/Cxcl10/Insig2/Cry2/Sp100/Zc3h12a/Dgat2	29
BP	GO:2001236	regulation of extrinsic apoptotic signaling pathway	18/997	177/28928	0.101695	2.95068	4.91816	4.35639e-05	0.00037609	0.000221123	Thbs1/Tnfrsf12a/Hmox1/Nrg1/Dab2/Tnfsf10/Icam1/Hspa1b/Fgfr1/Gdnf/Gclc/Lmna/Il1b/Tnfaip3/Pmaip1/Yap1/Serpine1/Sp100	18
BP	GO:0001656	metanephros development	13/997	101/28928	0.128713	3.73461	5.20131	4.42567e-05	0.000381471	0.000224287	Rdh10/Ptch1/Egr1/Myc/Id3/Gdnf/Cxcr2/Spry1/Yap1/Lif/Sox9/Osr1/Osr2	13
BP	GO:0006817	phosphate ion transport	7/997	29/28928	0.241379	7.00363	6.11122	4.53999e-05	0.000388878	0.000228642	Fgfr1/Ip6k2/Cebpb/Fgfr4/Stc2/Cry2/Slc34a2	7
BP	GO:0007263	nitric oxide mediated signal transduction	7/997	29/28928	0.241379	7.00363	6.11122	4.53999e-05	0.000388878	0.000228642	Thbs1/Mt2/Rasd1/Gucy1a1/Mt1/Nos2/Gucy1b1	7
BP	GO:0010575	positive regulation of vascular endothelial growth factor production	7/997	29/28928	0.241379	7.00363	6.11122	4.53999e-05	0.000388878	0.000228642	Il6/Hif1a/Ptgs2/Il1a/Il1b/C5ar1/Gata4	7
BP	GO:2000831	regulation of steroid hormone secretion	7/997	29/28928	0.241379	7.00363	6.11122	4.53999e-05	0.000388878	0.000228642	Nrg1/Dab2/Runx1/Tspo/Cry2/Gal/Tac1	7
BP	GO:0015749	monosaccharide transmembrane transport	15/997	131/28928	0.114504	3.32233	5.03318	4.76475e-05	0.000407494	0.000239587	Nr4a3/Stxbp4/Myc/Slc2a1/Slc5a3/Il1b/Crebl2/Edn1/Slc23a2/Oga/Irs2/Slc5a4b/Slc27a1/Slc2a3/Fgf15	15
BP	GO:0002823	negative regulation of adaptive immune response based on somatic recombination of immune receptors built from immunoglobulin superfamily domains	10/997	62/28928	0.16129	4.67985	5.4801	4.77731e-05	0.000407931	0.000239845	Lilrb4b/Lilrb4a/Il4ra/Havcr2/Cd80/Il20rb/Pf4/Fcgr2b/Zc3h12a/Il1rl1	10
BP	GO:0030308	negative regulation of cell growth	19/997	195/28928	0.0974359	2.82711	4.83667	4.87554e-05	0.000415672	0.000244396	Dab2/Hspa1b/Hspa1a/Epha7/Ccn3/Sh3bp4/Ip6k2/Bdkrb1/Rb1/Rgs4/Cryab/Gja1/Ccr5/Sema6d/Ppara/Cirbp/Bcl11a/Ifrd1/Cda	19
BP	GO:0051591	response to cAMP	13/997	102/28928	0.127451	3.698	5.1571	4.91421e-05	0.00041735	0.000245382	Fosb/Areg/Stc1/Fosl1/Thbd/Inhbb/Per1/Rapgef2/Ptafr/Itpr2/Hcn4/Crem/Hmga1	13
BP	GO:0051709	regulation of killing of cells of another organism	5/997	13/28928	0.384615	11.1596	6.9222	4.91806e-05	0.00041735	0.000245382	Cxcl5/Bcl2l11/Cxcl1/Nos2/Clec7a	5
BP	GO:2000849	regulation of glucocorticoid secretion	5/997	13/28928	0.384615	11.1596	6.9222	4.91806e-05	0.00041735	0.000245382	Nrg1/Tspo/Cry2/Gal/Tac1	5
BP	GO:0002224	toll-like receptor signaling pathway	11/997	75/28928	0.146667	4.25554	5.33352	5.02847e-05	0.00042606	0.000250503	S100a8/S100a9/Fosl1/Irak3/Tlr13/Tlr3/Irf4/Mfhas1/Cd86/Tlr8/Tirap	11
BP	GO:0022612	gland morphogenesis	17/997	163/28928	0.104294	3.02611	4.90095	5.11816e-05	0.000432323	0.000254185	Areg/Ccl2/Il6/Ptch1/Cd44/Csf1/Fgfr1/Epha2/Tbx3/Id4/Ccl11/Cebpb/Tnfaip3/Tgfbr2/Plau/Tnc/Sox9	17
BP	GO:1903900	regulation of viral life cycle	17/997	163/28928	0.104294	3.02611	4.90095	5.11816e-05	0.000432323	0.000254185	Ch25h/Ifi207/Trim30d/Trim8/Ifitm1/Axl/Nr5a2/Trim12c/Vps37b/Plscr1/Tasor/Ifitm6/Ifi213/Trim34b/Mavs/Trim6/Oasl2	17
BP	GO:0006816	calcium ion transport	34/997	473/28928	0.0718816	2.08565	4.49776	5.13447e-05	0.000433033	0.000254603	Gem/Ccl3/Ccr1/Stc1/Icam1/Fgf2/Trpv3/Cysltr1/Bdkrb1/Gpr35/Ramp3/Ptgs2/Pln/Myb/F2r/Ppp3cc/Xcr1/Rgs4/Bhlha15/Edn1/Plch1/Gja1/Ccr5/Orai3/Itpr2/Serpine1/Tspo/Stc2/Cxcl10/Oga/Ednrb/Hspa2/Adrb2/Slc25a25	34
BP	GO:0045824	negative regulation of innate immune response	14/997	117/28928	0.119658	3.47189	5.06172	5.18928e-05	0.000436983	0.000256926	Ccr1/Ifi207/Havcr2/Irak3/Tnfaip3/Acod1/Sfn/Ifi213/Parp14/Stat2/Mavs/Pim1/Klrb1b/Mmp12	14
BP	GO:0061041	regulation of wound healing	15/997	132/28928	0.113636	3.29716	4.99769	5.20699e-05	0.000437803	0.000257407	Thbs1/Tnfrsf12a/Ccl2/Plat/S100a9/Plaur/Hif1a/Thbd/Fgf2/Anxa1/F2r/Serpine1/Plau/Clec7a/Fermt2	15
BP	GO:0072676	lymphocyte migration	13/997	103/28928	0.126214	3.66209	5.11344	5.44899e-05	0.000457448	0.000268958	Ch25h/Ccl2/Ccl3/Abl2/Icam1/Ripk3/Adam8/Ccl7/Cxcl16/Dock8/S1pr1/Cxcl10/Ecm1	13
BP	GO:0002448	mast cell mediated immunity	10/997	63/28928	0.15873	4.60556	5.4127	5.50496e-05	0.00046144	0.000271305	Hmox1/Nr4a3/Il4ra/D6Wsu163e/Foxf1/Gab2/Rabgef1/Pld2/Rasgrp1/Fcer1g	10
BP	GO:0030212	hyaluronan metabolic process	8/997	40/28928	0.2	5.80301	5.74302	5.58123e-05	0.000467119	0.000274644	Tnfaip6/Cd44/Fgf2/Cemip2/Il1b/Lyve1/Il15/Has1	8
BP	GO:0060045	positive regulation of cardiac muscle cell proliferation	7/997	30/28928	0.233333	6.77018	5.97409	5.74626e-05	0.000480198	0.000282334	Nrg1/Fgfr1/Fgf2/Tgfbr3/Yap1/Pim1/Gata4	7
BP	GO:0007259	cell surface receptor signaling pathway via JAK-STAT	18/997	181/28928	0.0994475	2.88547	4.8075	5.84622e-05	0.000487808	0.000286808	Cxcl5/Il6/Socs3/Cish/Il10/Cenpj/Csf2rb2/F2r/Csf2rb/Ptprd/Il15/Prlr/Parp14/Gadd45a/Stat2/Lif/Osm/Bcl3	18
BP	GO:0042476	odontogenesis	16/997	149/28928	0.107383	3.11571	4.89179	5.93206e-05	0.000494218	0.000290577	Bcl2l11/Csf1/Fgfr1/Id3/Bcl11b/Tnfrsf11b/Axin2/Csf3r/Adm/Edn1/Serpine1/Ppara/Tnc/Osr1/Osr2/Traf6	16
BP	GO:0031623	receptor internalization	17/997	165/28928	0.10303	2.98943	4.84183	5.97065e-05	0.000496679	0.000292024	Lilrb4b/Lilrb4a/Nrg1/Dab2/Sele/Arc/Ntf3/Ramp3/Tamalin/Ackr3/Plk2/Adm/Pld2/Ldlrap1/Cxcr2/Cblb/Fcer1g	17
BP	GO:1902806	regulation of cell cycle G1/S phase transition	19/997	198/28928	0.0959596	2.78427	4.75973	6.00077e-05	0.000498428	0.000293052	Adamts1/Stxbp4/Fam107a/Cenpj/Bcl7a/Susd2/Anxa1/Plk3/Rgcc/Rb1/Ccne2/Pdpn/Klf11/Prmt2/Ctdsp1/Lsm10/Cirbp/Sde2/Prkdc	19
BP	GO:0048469	cell maturation	22/997	250/28928	0.088	2.55332	4.6603	6.09404e-05	0.000505409	0.000297157	Rnd1/Abl2/Ereg/Fgfr1/Hif1a/Runx1/Axl/Calca/Rb1/Map3k13/Nr4a2/Rfx3/Bhlha15/Shb/Il15/Edn1/Gja1/Nemp1/Ednrb/Clec7a/Bcl11a/Abhd2	22
BP	GO:0060560	developmental growth involved in morphogenesis	24/997	286/28928	0.0839161	2.43483	4.6072	6.14616e-05	0.000508961	0.000299245	Areg/Tnfrsf12a/Rdh10/Sema7a/Spry2/Csf1/Epha7/Map3k13/Ccl11/Edn1/Ccr5/Spry1/Sema6d/Tgfbr2/Yap1/Vcl/S1pr1/Slc23a2/Ndel1/Tnc/Bcl11a/Sox9/Sin3a/Ifrd1	24
BP	GO:0009410	response to xenobiotic stimulus	35/997	498/28928	0.0702811	2.03921	4.41963	6.30426e-05	0.000521266	0.00030648	Fosb/Ccl2/Pde4b/Errfi1/Ccl3/Ptch1/Lcn2/Fosl1/Myc/Il10/Tnfrsf11b/Abcc1/Tlr3/Ptgs2/Rb1/Cyp2r1/Eng/Gclc/Dpyd/Il1b/Plin2/Nos2/Rorc/Edn1/Crot/Acer2/Cpt1a/Tgfbr2/Serpine1/Tspo/Ppp1r14a/Lrp8/Gsta5/Lox/Gata4	35
BP	GO:0070232	regulation of T cell apoptotic process	9/997	52/28928	0.173077	5.02183	5.4842	6.42094e-05	0.000530114	0.000311682	Ada/Bcl2l11/Ripk3/Adam8/Hif1a/Bcl11b/Dock8/Rorc/Bcl3	9
BP	GO:0046328	regulation of JNK cascade	17/997	166/28928	0.10241	2.97142	4.8126	6.44208e-05	0.00053106	0.000312238	Dab2/Gadd45g/Gadd45b/Naip6/Tlr3/Per1/Il1a/Mfhas1/Il1b/Edn1/Fgd4/Mdfi/Gadd45a/Fcgr2b/Rasgrp1/Tirap/Fgf15	17
BP	GO:0048705	skeletal system morphogenesis	23/997	269/28928	0.0855019	2.48084	4.6101	6.52516e-05	0.000537101	0.00031579	Thbs1/Csrnp1/Rdh10/Stc1/Myc/Sh3pxd2b/Schip1/Axin2/Tiparp/Sox6/Hoxb6/Ndst1/Mdfi/Tgfbr2/Por/Zfand5/Tmem119/Insig2/Sox9/Hoxb9/Osr1/Hoxc8/Osr2	23
BP	GO:0009636	response to toxic substance	21/997	234/28928	0.0897436	2.60391	4.65425	6.7034e-05	0.000550945	0.00032393	S100a8/Ccl3/Mt2/S100a9/Lcn2/Hif1a/Inhbb/Ptgs1/Prkcg/Abcc1/Ptges/Ptgs2/Nr4a2/Mt1/Abcg2/Slc11a1/Prdx6/Pim1/Slc7a11/Hp/Slc30a10	21
BP	GO:0070306	lens fiber cell differentiation	8/997	41/28928	0.195122	5.66147	5.64313	6.72612e-05	0.00055116	0.000324056	Spry2/Epha2/Fgf2/Vim/Spry1/Spred1/Maf/Slc7a11	8
BP	GO:0110110	positive regulation of animal organ morphogenesis	8/997	41/28928	0.195122	5.66147	5.64313	6.72612e-05	0.00055116	0.000324056	Csf1/Fgfr1/Fgf2/Gdnf/Edn1/Spry1/Fgfr4/Sox9	8
BP	GO:0015732	prostaglandin transport	7/997	31/28928	0.225806	6.55178	5.8431	7.20244e-05	0.000588432	0.00034597	Ptges/Ptgs2/Il1a/Il1b/Nos2/Edn1/Acsl4	7
BP	GO:1905523	positive regulation of macrophage migration	7/997	31/28928	0.225806	6.55178	5.8431	7.20244e-05	0.000588432	0.00034597	Thbs1/Ccl2/Csf1/Cx3cr1/Trem1/Il34/C5ar1	7
BP	GO:0034101	erythrocyte homeostasis	18/997	184/28928	0.0978261	2.83843	4.72648	7.24316e-05	0.000590255	0.000347042	Hmox1/Hspa1b/Hif1a/Axl/Hba-a2/Hba-a1/Rb1/Tgfbr3/Myb/Adgrf5/Sox6/Mfhas1/Hoxb6/Bbs4/Alas2/Nemp1/Prkdc/Hmga1	18
BP	GO:0032653	regulation of interleukin-10 production	10/997	65/28928	0.153846	4.46385	5.28204	7.24629e-05	0.000590255	0.000347042	Lilrb4b/Lilrb4a/Il6/Il20rb/Irf4/Inava/Fcgr2b/Clec7a/Fcer1g/Bcl3	10
BP	GO:0002763	positive regulation of myeloid leukocyte differentiation	11/997	78/28928	0.141026	4.09187	5.16596	7.27035e-05	0.00059046	0.000347163	Ccl3/Ccr1/Trib1/Klf10/Csf1/Runx1/Ninj1/Rb1/Il34/Lif/Traf6	11
BP	GO:1902893	regulation of miRNA transcription	11/997	78/28928	0.141026	4.09187	5.16596	7.27035e-05	0.00059046	0.000347163	Lilrb4b/Lilrb4a/Fosl1/Egr1/Myc/Il10/Hif1a/Myb/Ppara/Sox9/Gata4	11
BP	GO:0071496	cellular response to external stimulus	13/997	106/28928	0.122642	3.55845	4.98567	7.36805e-05	0.000597509	0.000351307	Fgf2/Slc2a1/Tlr3/Ptgs2/Eng/Gclc/Il1b/Gja1/Bag3/Tlr8/Gadd45a/Sox9/Cda	13
BP	GO:0051917	regulation of fibrinolysis	5/997	14/28928	0.357143	10.3625	6.62001	7.43311e-05	0.000601895	0.000353886	Thbs1/Plat/Plaur/Serpine1/Plau	5
BP	GO:0006636	unsaturated fatty acid biosynthetic process	9/997	53/28928	0.169811	4.92708	5.40634	7.49982e-05	0.000604618	0.000355487	Sphk1/Ptgs1/Scd2/Anxa1/Ptges/Ptgs2/Avpr1a/Il1b/Edn1	9
BP	GO:0060043	regulation of cardiac muscle cell proliferation	9/997	53/28928	0.169811	4.92708	5.40634	7.49982e-05	0.000604618	0.000355487	Nrg1/Fgfr1/Fgf2/Tgfbr3/Gja1/Tgfbr2/Yap1/Pim1/Gata4	9
BP	GO:0061028	establishment of endothelial barrier	9/997	53/28928	0.169811	4.92708	5.40634	7.49982e-05	0.000604618	0.000355487	Icam1/Cdh5/Robo4/Rapgef2/Il1b/Tjp2/Vcl/S1pr3/Ednrb	9
BP	GO:0055017	cardiac muscle tissue growth	14/997	121/28928	0.115702	3.35711	4.90885	7.52405e-05	0.000605681	0.000356112	Nrg1/Fgfr1/Fgf2/Tgfbr3/Rgs4/Edn1/Gja1/Tgfbr2/Yap1/S1pr1/Ppara/Pim1/Meis1/Gata4	14
BP	GO:0019229	regulation of vasoconstriction	12/997	92/28928	0.130435	3.78457	5.05406	7.56029e-05	0.000607706	0.000357302	Icam1/Dusp5/Hif1a/Ptgs1/Cysltr1/Ptgs2/Adm/F2r/Tacr1/Avpr1a/Edn1/Gja1	12
BP	GO:0048738	cardiac muscle tissue development	24/997	290/28928	0.0827586	2.40125	4.53104	7.64028e-05	0.000613236	0.000360554	Sik1/Nrg1/Fhl2/Adamts9/Fgfr1/Fgf2/Tbx3/Pln/Tgfbr3/Asb2/Eng/Sox6/Lmna/Rgs4/Edn1/Gja1/Tgfbr2/Yap1/Ube4b/S1pr1/Ppara/Pim1/Meis1/Gata4	24
BP	GO:0031396	regulation of protein ubiquitination	20/997	219/28928	0.0913242	2.64978	4.63014	7.77974e-05	0.000623517	0.000366598	Sphk1/Trib1/Spry2/Hspa1b/Fam107a/Prkcg/Gclc/Sqstm1/Skp2/Ogt/Cdc20/Bag2/Tnfaip3/Rasd2/Cblb/Inava/Tspo/Dtx3l/Arrdc3/Herpud1	20
BP	GO:0007178	cell surface receptor protein serine/threonine kinase signaling pathway	30/997	405/28928	0.0740741	2.14926	4.40053	8.14843e-05	0.000651355	0.000382966	Thbs1/Tnfaip6/Ccl2/Dab2/Gcnt2/Spry2/Egr1/Ccn1/Zyx/Ccn3/Inhbb/Pakap/Cdh5/Tgfbr3/Eng/Gdnf/Pmepa1/Ogt/Lrrc32/Spry1/Spred1/Tgfbr2/Acvr1c/Ppara/Tnrc6c/Lox/Gata4/Sin3a/Id1/Fermt2	30
BP	GO:0043433	negative regulation of DNA-binding transcription factor activity	16/997	153/28928	0.104575	3.03425	4.76649	8.15847e-05	0.000651355	0.000382966	Sik1/Nfkbia/Trib1/Ptch1/Havcr2/Irak3/Id3/Prmt2/Tnfaip3/Acod1/Bhlhe40/Pim1/Sp100/Zc3h12a/Id1/Bcl3	16
BP	GO:0010632	regulation of epithelial cell migration	11/997	79/28928	0.139241	4.04007	5.11196	8.1865e-05	0.000651355	0.000382966	Hif1a/Vim/Gab2/Tgfbr3/Tacr1/Ptprr/Tgfbr2/Serpine1/Irs2/Sox9/Tac1	11
BP	GO:0032436	positive regulation of proteasomal ubiquitin-dependent protein catabolic process	11/997	79/28928	0.139241	4.04007	5.11196	8.1865e-05	0.000651355	0.000382966	Trib1/Dab2/Csnk1e/Hspa1b/Hspa1a/Axin2/Plk3/Plk2/Gclc/Cdc20/Cbfa2t3	11
BP	GO:0140115	export across plasma membrane	11/997	79/28928	0.139241	4.04007	5.11196	8.1865e-05	0.000651355	0.000382966	Kcne4/Kcne3/Abcc1/Agrn/Abcg2/Gja1/Slc4a4/Slc30a2/Slc40a1/Slc30a10/Slc27a1	11
BP	GO:0060420	regulation of heart growth	12/997	93/28928	0.129032	3.74388	5.00728	8.4117e-05	0.000668303	0.000392931	Nrg1/Fgfr1/Fgf2/Tgfbr3/Rgs4/Edn1/Gja1/Tgfbr2/Yap1/Ppara/Pim1/Gata4	12
BP	GO:0003015	heart process	22/997	256/28928	0.0859375	2.49348	4.53468	8.6528e-05	0.000686464	0.000403608	Kcne4/Stc1/Ada/Kcne3/Ramp3/Pln/Adm/Ptpn1/Avpr1a/Map2k3/Rgs4/Agrn/Edn1/Gja1/Yap1/Hcn4/Ednrb/Adrb2/Zc3h12a/Tac1/Scn3b/Gata4	22
BP	GO:0045931	positive regulation of mitotic cell cycle	15/997	138/28928	0.108696	3.15381	4.79162	8.69682e-05	0.000688692	0.000404919	Adamts1/Sphk1/Fgfr1/Cenpj/Anxa1/Rgcc/Rb1/Ccne2/Rad51c/Shb/Cdc20/Lsm10/Meis2/Hspa2/Sin3a	15
BP	GO:0032715	negative regulation of interleukin-6 production	9/997	54/28928	0.166667	4.83584	5.3304	8.72701e-05	0.000688692	0.000404919	Lilrb4b/Lilrb4a/Havcr2/Il10/Irak3/Rabgef1/Tnfaip3/Zc3h12a/Bank1	9
BP	GO:0071526	semaphorin-plexin signaling pathway	9/997	54/28928	0.166667	4.83584	5.3304	8.72701e-05	0.000688692	0.000404919	Sema7a/Sema6a/Sema6b/Ece1/Gdnf/Sema4a/Sema4c/Edn1/Sema6d	9
BP	GO:0035592	establishment of protein localization to extracellular region	32/997	446/28928	0.0717489	2.0818	4.34995	8.73114e-05	0.000688692	0.000404919	Il6/Stxbp4/Hcar2/Klf7/Il1rn/Hif1a/Ccn3/Glul/Inhbb/Anxa1/Rhbdf1/Lrrc8a/Il1a/F2r/Rfx3/Pim3/Il1b/Lrrc32/Nos2/Gja1/Cpt1a/Plek/Acvr1c/A1cf/Acsl4/Oga/Ednrb/Irs2/Fam3b/Midn/Vip/Hmga1	32
BP	GO:0010460	positive regulation of heart rate	7/997	32/28928	0.21875	6.34704	5.71776	8.94625e-05	0.000704646	0.000414298	Ada/Adm/Ptpn1/Avpr1a/Rgs4/Edn1/Scn3b	7
BP	GO:0030073	insulin secretion	23/997	275/28928	0.0836364	2.42671	4.49132	9.11883e-05	0.000717209	0.000421685	Il6/Stxbp4/Klf7/Il1rn/Hif1a/Ccn3/Glul/Inhbb/Anxa1/Lrrc8a/Rfx3/Pim3/Il1b/Nos2/Gja1/Cpt1a/Acvr1c/Acsl4/Oga/Irs2/Fam3b/Midn/Hmga1	23
BP	GO:0061614	miRNA transcription	11/997	80/28928	0.1375	3.98957	5.05885	9.19958e-05	0.000722523	0.000424809	Lilrb4b/Lilrb4a/Fosl1/Egr1/Myc/Il10/Hif1a/Myb/Ppara/Sox9/Gata4	11
BP	GO:0014823	response to activity	12/997	94/28928	0.12766	3.70405	4.96115	9.34434e-05	0.000731795	0.000430261	Itga5/Ccl2/Il6/Il10/Hif1a/Rnf170/Gclc/Edn1/Slc7a5/Cry2/Prkdc/Slc25a25	12
BP	GO:0071901	negative regulation of protein serine/threonine kinase activity	12/997	94/28928	0.12766	3.70405	4.96115	9.34434e-05	0.000731795	0.000430261	Spry2/Irak3/Spry4/Rb1/Ptpn1/Chordc1/Dusp1/Il1b/Tnfaip3/Spry1/Nr2f2/Gadd45a	12
BP	GO:0045776	negative regulation of blood pressure	10/997	67/28928	0.149254	4.3306	5.15657	9.43439e-05	0.000735694	0.000432554	Ier3/Bdkrb1/Calca/Nos2/Ptafr/Bbs4/Bdkrb2/Ppara/Adrb2/Tac1	10
BP	GO:0140374	antiviral innate immune response	10/997	67/28928	0.149254	4.3306	5.15657	9.43439e-05	0.000735694	0.000432554	Nlrp1b/Sting1/Cxcl10/Mavs/Trim6/Ifit3/Trim65/Ifit3b/Traf6/Oasl2	10
BP	GO:1903053	regulation of extracellular matrix organization	10/997	67/28928	0.149254	4.3306	5.15657	9.43439e-05	0.000735694	0.000432554	Il6/Abl2/Tnfrsf1b/Axin2/Rgcc/Rb1/Tgfbr3/Pdpn/Fgfr4/Sox9	10
BP	GO:0008016	regulation of heart contraction	19/997	205/28928	0.0926829	2.6892	4.58563	9.56534e-05	0.00074465	0.000437819	Kcne4/Stc1/Ada/Kcne3/Pln/Adm/Ptpn1/Avpr1a/Rgs4/Agrn/Edn1/Gja1/Hcn4/Ednrb/Adrb2/Zc3h12a/Tac1/Scn3b/Gata4	19
BP	GO:0032689	negative regulation of type II interferon production	8/997	43/28928	0.186047	5.39815	5.45285	9.60469e-05	0.00074465	0.000437819	Lilrb4b/Lilrb4a/Havcr2/Il10/Axl/Il20rb/Zc3h12a/Il1rl1	8
BP	GO:0038084	vascular endothelial growth factor signaling pathway	8/997	43/28928	0.186047	5.39815	5.45285	9.60469e-05	0.00074465	0.000437819	Spry2/Pgf/Sema6a/Flt1/Adamts3/Adgrg1/Ptp4a3/Myo1c	8
BP	GO:0071398	cellular response to fatty acid	8/997	43/28928	0.186047	5.39815	5.45285	9.60469e-05	0.00074465	0.000437819	Ccl2/Id3/Pdk4/Ptafr/Edn1/Cpt1a/Zc3h12a/Dgat2	8
BP	GO:0009952	anterior/posterior pattern specification	21/997	240/28928	0.0875	2.53882	4.52271	9.62434e-05	0.00074465	0.000437819	Pgap1/Ets2/Arc/Nrarp/Foxf1/Tbx3/Axin2/Ifitm1/Scmh1/Hoxb6/Tasor/Hoxc6/Bhlhe40/Nr2f2/Zbtb16/Meox2/Hoxb9/Osr1/Hoxc8/Gata4/Prkdc	21
BP	GO:0090068	positive regulation of cell cycle process	23/997	276/28928	0.0833333	2.41792	4.47183	9.63073e-05	0.00074465	0.000437819	Adamts1/Sphk1/Stxbp4/Ereg/Fgfr1/Cenpj/Anxa1/Rgcc/Rb1/Ccne2/Il1a/Plscr1/Il1b/Rad51c/Edn1/Btc/Cdc20/Gja1/Lsm10/Prdm9/Hspa2/Sin3a/Kif20b	23
BP	GO:0008544	epidermis development	30/997	409/28928	0.0733496	2.12824	4.34163	9.71008e-05	0.000749727	0.000440804	Maff/Errfi1/Ptch1/Klf7/Fgfr1/Clic4/Bcl11b/Epha2/Ppl/Fgf2/Ptgs1/Runx1/Ntf3/Anxa1/Ptgs2/Bcr/Ovol1/Il1a/Sprr2h/Flnb/Slitrk6/Sfn/Aloxe3/Ctsl/Yap1/Ppara/Gsdme/Sox9/Gal/Stfa2l1	30
BP	GO:0035930	corticosteroid hormone secretion	6/997	23/28928	0.26087	7.56914	5.95446	0.000100706	0.000775378	0.000455886	Nrg1/Dab2/Tspo/Cry2/Gal/Tac1	6
BP	GO:0150104	transport across blood-brain barrier	6/997	23/28928	0.26087	7.56914	5.95446	0.000100706	0.000775378	0.000455886	Abcc1/Slc2a1/Abcg2/Mfsd2a/Slc27a1/Flvcr2	6
BP	GO:0032965	regulation of collagen biosynthetic process	9/997	55/28928	0.163636	4.74792	5.25631	0.000101183	0.000776197	0.000456367	Ccl2/Errfi1/Il6/Vim/Rgcc/Eng/Myb/F2r/Serpine1	9
BP	GO:0061383	trabecula morphogenesis	9/997	55/28928	0.163636	4.74792	5.25631	0.000101183	0.000776197	0.000456367	Adamts1/Nrg1/Sbno2/Fhl2/Tgfbr3/Eng/Slc40a1/Ube4b/S1pr1	9
BP	GO:0141091	transforming growth factor beta receptor superfamily signaling pathway	28/997	371/28928	0.0754717	2.18981	4.35779	0.000101237	0.000776197	0.000456367	Thbs1/Tnfaip6/Ccl2/Dab2/Gcnt2/Spry2/Egr1/Ccn1/Zyx/Inhbb/Cdh5/Tgfbr3/Eng/Gdnf/Pmepa1/Ogt/Lrrc32/Spry1/Spred1/Tgfbr2/Acvr1c/Ppara/Tnrc6c/Lox/Gata4/Sin3a/Id1/Fermt2	28
BP	GO:0031341	regulation of cell killing	16/997	156/28928	0.102564	2.9759	4.67518	0.000102792	0.000787021	0.000462731	Ccl2/Cxcl5/Bcl2l11/Cxcl1/Havcr2/Ripk3/Pvr/Cx3cr1/Il18rap/Cd160/Nos2/Ccr5/Oga/Rasgrp1/Klrb1b/Clec7a	16
BP	GO:2000117	negative regulation of cysteine-type endopeptidase activity	11/997	81/28928	0.135802	3.94031	5.00659	0.000103178	0.000788874	0.000463821	Thbs1/Ifi207/Cd44/Plaur/Hspa1b/Nr4a1/Naip6/Ptgs2/Cryab/Ifi213/Bcl2a1d	11
BP	GO:2000628	regulation of miRNA metabolic process	12/997	95/28928	0.126316	3.66506	4.91564	0.000103645	0.000791339	0.00046527	Lilrb4b/Lilrb4a/Fosl1/Egr1/Myc/Il10/Hif1a/Myb/Ppara/Sox9/Zc3h12a/Gata4	12
BP	GO:0008406	gonad development	24/997	296/28928	0.0810811	2.35257	4.41912	0.000104926	0.000800005	0.000470365	Adamts1/Tnfaip6/Rdh10/Bcl2l11/Tnfsf10/Icam1/Ereg/Adam4/Schip1/Inhbb/Runx1/Gm4787/Tlr3/Tiparp/Il1a/Adgrg1/Cebpb/Gja1/Ctsl/Nr2f2/Serpine1/Sox9/Osr1/Gata4	24
BP	GO:0032613	interleukin-10 production	10/997	68/28928	0.147059	4.26692	5.09566	0.000107231	0.000813183	0.000478113	Lilrb4b/Lilrb4a/Il6/Il20rb/Irf4/Inava/Fcgr2b/Clec7a/Fcer1g/Bcl3	10
BP	GO:0033555	multicellular organismal response to stress	14/997	125/28928	0.112	3.24969	4.76227	0.000107248	0.000813183	0.000478113	Thbs1/Runx1/Prkcg/Calca/Grpr/Atat1/Nr4a2/Tacr1/Capn2/Gja1/Tspo/Ednrb/Tac1/Osm	14
BP	GO:0038061	non-canonical NF-kappaB signal transduction	14/997	125/28928	0.112	3.24969	4.76227	0.000107248	0.000813183	0.000478113	Sphk1/Nfkbia/Havcr2/Ripk3/Ccn3/Tlr3/Cd86/Il1b/Edn1/Nfkb2/Zc3h12a/Ptp4a3/Bcl3/Traf6	14
BP	GO:0098754	detoxification	14/997	125/28928	0.112	3.24969	4.76227	0.000107248	0.000813183	0.000478113	S100a8/Mt2/S100a9/Ptgs1/Abcc1/Ptges/Ptgs2/Mt1/Abcg2/Slc11a1/Prdx6/Pim1/Hp/Slc30a10	14
BP	GO:0031644	regulation of nervous system process	17/997	173/28928	0.0982659	2.85119	4.61395	0.00010765	0.000815105	0.000479243	Il6/Ccl3/Tnfrsf1b/Baiap2/Ccn3/Gpr35/Gpr171/Plk2/Egr2/F2r/Avpr1a/Ssh1/Rgs4/Tppp/Lrp8/Adrb2/Tac1	17
BP	GO:0007173	epidermal growth factor receptor signaling pathway	13/997	110/28928	0.118182	3.42905	4.82233	0.000108198	0.000815777	0.000479639	Areg/Errfi1/Abl2/Spry2/Plaur/Ereg/Fam83b/Rhbdf1/Gprc5a/Btc/Cblb/Sox9/Slc30a10	13
BP	GO:0046425	regulation of receptor signaling pathway via JAK-STAT	13/997	110/28928	0.118182	3.42905	4.82233	0.000108198	0.000815777	0.000479639	Cxcl5/Il6/Socs3/Cish/Il10/Cenpj/F2r/Ptprd/Prlr/Parp14/Gadd45a/Lif/Bcl3	13
BP	GO:0035933	glucocorticoid secretion	5/997	15/28928	0.333333	9.67168	6.34685	0.000108334	0.000815777	0.000479639	Nrg1/Tspo/Cry2/Gal/Tac1	5
BP	GO:0045651	positive regulation of macrophage differentiation	5/997	15/28928	0.333333	9.67168	6.34685	0.000108334	0.000815777	0.000479639	Trib1/Csf1/Rb1/Il34/Lif	5
BP	GO:0031295	T cell costimulation	7/997	33/28928	0.212121	6.15471	5.59765	0.000110189	0.000821848	0.000483208	Lilrb4b/Lilrb4a/Ephb4/Cd80/Cd86/Icos/Cd160	7
BP	GO:0034138	toll-like receptor 3 signaling pathway	7/997	33/28928	0.212121	6.15471	5.59765	0.000110189	0.000821848	0.000483208	Havcr2/Rnf170/Tlr3/Cd86/Tnfaip3/Tnip2/Tirap	7
BP	GO:0035455	response to interferon-alpha	7/997	33/28928	0.212121	6.15471	5.59765	0.000110189	0.000821848	0.000483208	Myc/Ifitm1/Axl/Ifit1/Plscr1/Ifitm6/Ifi204	7
BP	GO:0045980	negative regulation of nucleotide metabolic process	7/997	33/28928	0.212121	6.15471	5.59765	0.000110189	0.000821848	0.000483208	Ier3/Ddit4/Entpd1/Ppara/Tspo/Cbfa2t3/Cda	7
BP	GO:0046697	decidualization	7/997	33/28928	0.212121	6.15471	5.59765	0.000110189	0.000821848	0.000483208	Stc1/Junb/Ptgs2/Gja1/Ctsl/Stc2/Lif	7
BP	GO:0048745	smooth muscle tissue development	7/997	33/28928	0.212121	6.15471	5.59765	0.000110189	0.000821848	0.000483208	Ptch1/Schip1/Tiparp/Eng/Zfand5/Sox9/Osr1	7
BP	GO:0070723	response to cholesterol	7/997	33/28928	0.212121	6.15471	5.59765	0.000110189	0.000821848	0.000483208	Ccl3/Ptch1/Inhbb/Gramd1a/Ccr5/Tgfbr2/Lrp8	7
BP	GO:0071692	protein localization to extracellular region	32/997	452/28928	0.0707965	2.05416	4.26769	0.000111779	0.000832569	0.000489511	Il6/Stxbp4/Hcar2/Klf7/Il1rn/Hif1a/Ccn3/Glul/Inhbb/Anxa1/Rhbdf1/Lrrc8a/Il1a/F2r/Rfx3/Pim3/Il1b/Lrrc32/Nos2/Gja1/Cpt1a/Plek/Acvr1c/A1cf/Acsl4/Oga/Ednrb/Irs2/Fam3b/Midn/Vip/Hmga1	32
BP	GO:0061180	mammary gland epithelium development	11/997	82/28928	0.134146	3.89226	4.95516	0.000115499	0.000859115	0.000505119	Areg/Ptch1/Csf1/Hif1a/Epha2/Fgf2/Foxf1/Tbx3/Ccl11/Cebpb/Prlr	11
BP	GO:0071356	cellular response to tumor necrosis factor	19/997	208/28928	0.0913462	2.65041	4.51324	0.00011594	0.000861225	0.00050636	Sphk1/Ccl2/Il6/Akap12/Nfkbia/Tnfrsf1b/Hspa1b/Tnfrsf11b/Krt18/Cx3cr1/Naip6/Plvap/Edn1/Tjp2/Acod1/Mmp8/Gsdme/Zc3h12a/Traf6	19
BP	GO:1904659	D-glucose transmembrane transport	14/997	126/28928	0.111111	3.22389	4.72655	0.000116889	0.000863731	0.000507833	Nr4a3/Stxbp4/Myc/Slc2a1/Slc5a3/Il1b/Crebl2/Edn1/Oga/Irs2/Slc5a4b/Slc27a1/Slc2a3/Fgf15	14
BP	GO:0010634	positive regulation of epithelial cell migration	9/997	56/28928	0.160714	4.66313	5.18399	0.000116908	0.000863731	0.000507833	Hif1a/Vim/Gab2/Tacr1/Tgfbr2/Serpine1/Irs2/Sox9/Tac1	9
BP	GO:0032309	icosanoid secretion	9/997	56/28928	0.160714	4.66313	5.18399	0.000116908	0.000863731	0.000507833	Anxa1/Ptges/Ptgs2/Il1a/Il1b/Nos2/Edn1/Bdkrb2/Acsl4	9
BP	GO:0061097	regulation of protein tyrosine kinase activity	9/997	56/28928	0.160714	4.66313	5.18399	0.000116908	0.000863731	0.000507833	Lilrb4b/Lilrb4a/Errfi1/Epha4/Rap2b/Ptpn1/Gprc5a/Il34/Agrn	9
BP	GO:1901800	positive regulation of proteasomal protein catabolic process	13/997	111/28928	0.117117	3.39816	4.78268	0.000118743	0.00087611	0.000515112	Trib1/Dab2/Csnk1e/Hspa1b/Hspa1a/Axin2/Plk3/Plk2/Gclc/Cdc20/Bag2/Cbfa2t3/Herpud1	13
BP	GO:0042594	response to starvation	21/997	244/28928	0.0860656	2.4972	4.43721	0.000121518	0.000894611	0.000525989	Nuak2/Rnf152/Klf10/Ifi207/Glul/Inhbb/Slc2a1/Adm/Zfyve1/Plin2/Bhlha15/Pdk4/Pmaip1/Ctsl/Ifi213/Ppara/Gabarapl1/Angptl4/Slc7a5/Mfsd2a/Zc3h12a	21
BP	GO:0060135	maternal process involved in female pregnancy	10/997	69/28928	0.144928	4.20508	5.03592	0.000121577	0.000894611	0.000525989	Ccl2/Stc1/Havcr2/Junb/Ptgs2/Gja1/Ctsl/Nr2f2/Stc2/Lif	10
BP	GO:1901654	response to ketone	25/997	318/28928	0.0786164	2.28106	4.33989	0.000123999	0.000911213	0.000535751	Fosb/Ccl2/Errfi1/Fosl1/Ddit4/Axin2/Pln/Tgfbr3/Gdnf/Tacr1/Avpr1a/Pappa/Klf9/Ptafr/Edn1/Acod1/Pf4/Por/Yap1/Tspo/P2ry4/Tnc/Abhd2/Sin3a/Cda	25
BP	GO:0036294	cellular response to decreased oxygen levels	18/997	192/28928	0.09375	2.72016	4.51817	0.000125072	0.000917862	0.00053966	Stc1/Myc/Epha4/Adam8/Hif1a/Cysltr1/Plk3/Hilpda/Ptgs2/Rgcc/Ptpn1/Ptprd/Lmna/Ogt/Ndrg1/Edn1/Stc2/Adrb2	18
BP	GO:0002791	regulation of peptide secretion	23/997	281/28928	0.0818505	2.3749	4.37562	0.00012594	0.000921763	0.000541953	S100a8/Il6/Stxbp4/S100a9/Ildr1/Klf7/Hif1a/Ccn3/Glul/Inhbb/Lrrc8a/Rfx3/Pim3/Il1b/Nos2/Gja1/Cpt1a/Acvr1c/Acsl4/Oga/Irs2/Lif/Midn	23
BP	GO:0090087	regulation of peptide transport	23/997	281/28928	0.0818505	2.3749	4.37562	0.00012594	0.000921763	0.000541953	S100a8/Il6/Stxbp4/S100a9/Ildr1/Klf7/Hif1a/Ccn3/Glul/Inhbb/Lrrc8a/Rfx3/Pim3/Il1b/Nos2/Gja1/Cpt1a/Acvr1c/Acsl4/Oga/Irs2/Lif/Midn	23
BP	GO:0044772	mitotic cell cycle phase transition	32/997	455/28928	0.0703297	2.04062	4.22704	0.000126189	0.000922359	0.000542304	Adamts1/Ier3/Myc/Fam107a/Cenpj/Bcl7a/Ppp2r2d/Anxa1/Plk3/Zwint/Id4/Rgcc/Rb1/Ccne2/Plk2/Pdpn/Myb/Klf11/Prmt2/Dusp1/Rad51c/Skp2/Cdc20/Ctdsp1/Donson/Cables1/Nek6/Lsm10/Hspa2/Sde2/Sin3a/Prkdc	32
BP	GO:0045137	development of primary sexual characteristics	24/997	300/28928	0.08	2.3212	4.34601	0.000128873	0.000940723	0.000553101	Adamts1/Tnfaip6/Rdh10/Bcl2l11/Tnfsf10/Icam1/Ereg/Adam4/Schip1/Inhbb/Runx1/Gm4787/Tlr3/Tiparp/Il1a/Adgrg1/Cebpb/Gja1/Ctsl/Nr2f2/Serpine1/Sox9/Osr1/Gata4	24
BP	GO:0031397	negative regulation of protein ubiquitination	11/997	83/28928	0.13253	3.84537	4.90454	0.000129052	0.000940777	0.000553133	Spry2/Hspa1b/Prkcg/Gclc/Sqstm1/Ogt/Bag2/Tnfaip3/Rasd2/Tspo/Dtx3l	11
BP	GO:0051101	regulation of DNA binding	13/997	112/28928	0.116071	3.36782	4.74347	0.000130162	0.000945377	0.000555837	Ifi207/Plaur/Rb1/Irf4/Niban2/Mdfi/Ifi213/Runx1t1/Trim6/Lif/Sp100/Id1/Traf6	13
BP	GO:0007015	actin filament organization	33/997	476/28928	0.0693277	2.01155	4.20426	0.00013037	0.000945377	0.000555837	Rnd1/Abl2/Rnd3/Csf3/Icam1/Baiap2/Fam107a/Sh3pxd2b/Zyx/Sdc4/Pakap/Rhoj/Rnh1/Rgcc/Tacr1/Ccl11/Cdc42ep3/Ssh1/Rgs4/Fhdc1/Bbs4/Gja1/Plek/Cracd/S1pr1/Cdc42ep2/Pstpip2/Pof1b/Tac1/Id1/Limd2/Fermt2/Myo1c	33
BP	GO:0033033	negative regulation of myeloid cell apoptotic process	6/997	24/28928	0.25	7.25376	5.79061	0.000130373	0.000945377	0.000555837	Itpkb/Cxcr2/Ccr5/Fcgr2b/Fcer1g/St6gal1	6
BP	GO:0034114	regulation of heterotypic cell-cell adhesion	6/997	24/28928	0.25	7.25376	5.79061	0.000130373	0.000945377	0.000555837	Gcnt2/Cd44/Il10/Il1rn/Il1b/Tnfaip3	6
BP	GO:0001893	maternal placenta development	8/997	45/28928	0.177778	5.15823	5.27412	0.000134343	0.000970007	0.000570318	Stc1/Junb/Ptgs2/Gja1/Ctsl/Nr2f2/Stc2/Lif	8
BP	GO:0045823	positive regulation of heart contraction	8/997	45/28928	0.177778	5.15823	5.27412	0.000134343	0.000970007	0.000570318	Ada/Adm/Ptpn1/Avpr1a/Rgs4/Edn1/Adrb2/Scn3b	8
BP	GO:0032369	negative regulation of lipid transport	7/997	34/28928	0.205882	5.97369	5.48239	0.000134654	0.000970007	0.000570318	Thbs1/Nrg1/Acsl4/Tspo/Irs2/Cry2/Igfbp3	7
BP	GO:0032673	regulation of interleukin-4 production	7/997	34/28928	0.205882	5.97369	5.48239	0.000134654	0.000970007	0.000570318	Havcr2/Il20rb/Irf4/Cebpb/Icosl/Slc7a5/Fcer1g	7
BP	GO:0035929	steroid hormone secretion	7/997	34/28928	0.205882	5.97369	5.48239	0.000134654	0.000970007	0.000570318	Nrg1/Dab2/Runx1/Tspo/Cry2/Gal/Tac1	7
BP	GO:0001704	formation of primary germ layer	14/997	128/28928	0.109375	3.17352	4.65617	0.000138445	0.0009947	0.000584837	Itga5/Nr4a3/Lama3/Ets2/Dusp5/Fgfr1/Dusp4/Epha2/Foxf1/Dusp1/Gja1/Mmp8/Tnrc6c/Gata4	14
BP	GO:0008645	hexose transmembrane transport	14/997	128/28928	0.109375	3.17352	4.65617	0.000138445	0.0009947	0.000584837	Nr4a3/Stxbp4/Myc/Slc2a1/Slc5a3/Il1b/Crebl2/Edn1/Oga/Irs2/Slc5a4b/Slc27a1/Slc2a3/Fgf15	14
BP	GO:0046209	nitric oxide metabolic process	12/997	98/28928	0.122449	3.55286	4.78271	0.000140186	0.00100589	0.000591414	Il6/Icam1/Il10/Cx3cr1/Ptgs2/Il1b/Nos2/Por/Ppara/Tspo/Clec7a/Zc3h12a	12
BP	GO:0019217	regulation of fatty acid metabolic process	13/997	113/28928	0.115044	3.33801	4.70471	0.000142515	0.00101993	0.000599673	Anxa1/Ptgs2/Avpr1a/Il1b/Pdk4/Cpt1a/Acsl4/Ppara/Insig2/Irs2/Mfsd2a/Sox9/Dgat2	13
BP	GO:0033135	regulation of peptidyl-serine phosphorylation	13/997	113/28928	0.115044	3.33801	4.70471	0.000142515	0.00101993	0.000599673	Il6/Spry2/Cd44/Ip6k2/Ntf3/Ptgs2/Ogt/Crebl2/Bdkrb2/Gadd45a/Trim6/Lif/Osm	13
BP	GO:0042180	cellular ketone metabolic process	22/997	265/28928	0.0830189	2.4088	4.35278	0.000142885	0.00102124	0.000600443	Rdh10/Dab2/Egr1/Anxa1/Ptgs2/Avpr1a/Il1b/Pdk4/H6pd/Cpt1a/Kyat1/Acsl4/Ppara/Fgfr4/Insig2/Ednrb/Irs2/Slc7a11/Mfsd2a/Sox9/Dgat2/Fgf15	22
BP	GO:0002706	regulation of lymphocyte mediated immunity	21/997	248/28928	0.0846774	2.45692	4.35339	0.000152498	0.00108854	0.000640008	Lilrb4b/Lilrb4a/Il6/Tnfrsf1b/Havcr2/Ripk3/Pvr/Il1r1/Il18rap/Cd80/Arid5a/Il20rb/Fcgr3/Il1b/Aplf/Cd160/Fcgr2b/Rasgrp1/Klrb1b/Fcer1g/Traf6	21
BP	GO:0097709	connective tissue replacement	5/997	16/28928	0.3125	9.0672	6.09817	0.00015311	0.00109007	0.000640907	Hif1a/Il1a/F2r/Timp1/Gata4	5
BP	GO:1903671	negative regulation of sprouting angiogenesis	5/997	16/28928	0.3125	9.0672	6.09817	0.00015311	0.00109007	0.000640907	Thbs1/Adamts9/Sema6a/Flt1/Stard13	5
BP	GO:0042149	cellular response to glucose starvation	9/997	58/28928	0.155172	4.50233	5.04434	0.00015453	0.00109477	0.000643672	Nuak2/Ifi207/Slc2a1/Plin2/Bhlha15/Pmaip1/Ifi213/Slc7a5/Zc3h12a	9
BP	GO:0046578	regulation of Ras protein signal transduction	9/997	58/28928	0.155172	4.50233	5.04434	0.00015453	0.00109477	0.000643672	Nrg1/Spry2/Csf1/Spry4/Spry3/Itpkb/Rabgef1/Spry1/Rasgrp1	9
BP	GO:0070229	negative regulation of lymphocyte apoptotic process	9/997	58/28928	0.155172	4.50233	5.04434	0.00015453	0.00109477	0.000643672	Ada/Cd44/Hif1a/Bcl11b/Dock8/Rorc/Bcl2a1a/Irs2/Bcl3	9
BP	GO:0034340	response to type I interferon	12/997	99/28928	0.121212	3.51698	4.73956	0.000154592	0.00109477	0.000643672	Ch25h/Ifitm1/Sting1/Ifitm6/Stat2/Mavs/Trim6/Trim65/Sp100/Mmp12/Sin3a/Oasl2	12
BP	GO:0015909	long-chain fatty acid transport	10/997	71/28928	0.140845	4.08663	4.91976	0.000155169	0.00109477	0.000643672	Thbs1/Abcc1/Slc2a1/Anxa1/Plin2/Slc27a2/Bdkrb2/Irs2/Mfsd2a/Slc27a1	10
BP	GO:0032922	circadian regulation of gene expression	10/997	71/28928	0.140845	4.08663	4.91976	0.000155169	0.00109477	0.000643672	Csnk1e/Egr1/Per1/Ogt/Rorc/Bhlhe40/Ppara/Nudt12/Cry2/Crem	10
BP	GO:0071715	icosanoid transport	10/997	71/28928	0.140845	4.08663	4.91976	0.000155169	0.00109477	0.000643672	Abcc1/Anxa1/Ptges/Ptgs2/Il1a/Il1b/Nos2/Edn1/Bdkrb2/Acsl4	10
BP	GO:0098739	import across plasma membrane	19/997	213/28928	0.0892019	2.5882	4.39537	0.000158249	0.00111507	0.000655607	Thbs1/Lcn2/Slc7a1/Trpv3/Abcc1/Slc2a1/Slc12a4/Slc9a9/Gfap/Lrrc8a/Ppp3cc/Rgs4/Slc15a3/Hcn4/Irs2/Slc7a5/Slc7a11/Adrb2/Slc27a1	19
BP	GO:0008543	fibroblast growth factor receptor signaling pathway	11/997	85/28928	0.129412	3.75489	4.80562	0.000160251	0.00112773	0.000663049	Thbs1/Spry2/Fgfr1/Fgf2/Spry4/Spry3/Ndst1/Spry1/Flrt2/Fgfr4/Fgf15	11
BP	GO:0002719	negative regulation of cytokine production involved in immune response	7/997	35/28928	0.2	5.80301	5.37164	0.000163344	0.00114654	0.000674114	Lilrb4b/Hmox1/Lilrb4a/Il10/Irak3/Axl/Rabgef1	7
BP	GO:0031294	lymphocyte costimulation	7/997	35/28928	0.2	5.80301	5.37164	0.000163344	0.00114654	0.000674114	Lilrb4b/Lilrb4a/Ephb4/Cd80/Cd86/Icos/Cd160	7
BP	GO:0010759	positive regulation of macrophage chemotaxis	6/997	25/28928	0.24	6.96361	5.63591	0.000166563	0.00116318	0.000683895	Thbs1/Ccl2/Csf1/Trem1/Il34/C5ar1	6
BP	GO:0070242	thymocyte apoptotic process	6/997	25/28928	0.24	6.96361	5.63591	0.000166563	0.00116318	0.000683895	Ada/Bcl2l11/Adam8/Hif1a/Bcl11b/Rorc	6
BP	GO:0072537	fibroblast activation	6/997	25/28928	0.24	6.96361	5.63591	0.000166563	0.00116318	0.000683895	Akap12/Fgfr1/Rgcc/Myb/Gclc/Il17ra	6
BP	GO:0140354	lipid import into cell	6/997	25/28928	0.24	6.96361	5.63591	0.000166563	0.00116318	0.000683895	Thbs1/Abcc1/Slc2a1/Slc27a2/Irs2/Slc27a1	6
BP	GO:2000060	positive regulation of ubiquitin-dependent protein catabolic process	12/997	100/28928	0.12	3.48181	4.69696	0.000170246	0.00118157	0.000694708	Trib1/Dab2/Csnk1e/Hspa1b/Hspa1a/Axin2/Plk3/Plk2/Gclc/Cdc20/Cbfa2t3/Herpud1	12
BP	GO:2001057	reactive nitrogen species metabolic process	12/997	100/28928	0.12	3.48181	4.69696	0.000170246	0.00118157	0.000694708	Il6/Icam1/Il10/Cx3cr1/Ptgs2/Il1b/Nos2/Por/Ppara/Tspo/Clec7a/Zc3h12a	12
BP	GO:0002027	regulation of heart rate	13/997	115/28928	0.113043	3.27996	4.62848	0.000170274	0.00118157	0.000694708	Kcne4/Ada/Kcne3/Pln/Adm/Ptpn1/Avpr1a/Rgs4/Edn1/Hcn4/Ednrb/Tac1/Scn3b	13
BP	GO:0031640	killing of cells of another organism	13/997	115/28928	0.113043	3.27996	4.62848	0.000170274	0.00118157	0.000694708	Cxcl5/Bcl2l11/Cxcl1/Ninj1/Trem1/Ccl11/Nos2/Gbp2b/Cxcl10/Gbp2/Clec7a/Nts/Tac1	13
BP	GO:0141061	disruption of cell in another organism	13/997	115/28928	0.113043	3.27996	4.62848	0.000170274	0.00118157	0.000694708	Cxcl5/Bcl2l11/Cxcl1/Ninj1/Trem1/Ccl11/Nos2/Gbp2b/Cxcl10/Gbp2/Clec7a/Nts/Tac1	13
BP	GO:0043254	regulation of protein-containing complex assembly	32/997	463/28928	0.0691145	2.00536	4.12014	0.000173118	0.00119979	0.00070542	Selp/Nrg1/Csf3/Bcl2l11/Ifi207/Icam1/Baiap2/Hspa1b/Hspa1a/Cdh5/Atat1/Ccl11/Ogt/Cdc42ep3/Ssh1/Cryab/Mmp3/Tppp/Bbs4/Plek/Cracd/Ifi213/Cdc42ep2/Mavs/Mpp7/Gbp2/Clec7a/Tirap/Trim65/Sox9/Fermt2/Myo1c	32
BP	GO:0009306	protein secretion	31/997	443/28928	0.0699774	2.0304	4.12909	0.000174637	0.00120878	0.000710708	Il6/Stxbp4/Hcar2/Klf7/Il1rn/Hif1a/Ccn3/Glul/Inhbb/Anxa1/Rhbdf1/Lrrc8a/Il1a/F2r/Rfx3/Pim3/Il1b/Nos2/Gja1/Cpt1a/Plek/Acvr1c/A1cf/Acsl4/Oga/Ednrb/Irs2/Fam3b/Midn/Vip/Hmga1	31
BP	GO:0060419	heart growth	14/997	131/28928	0.10687	3.10084	4.55315	0.000177204	0.00122346	0.00071934	Nrg1/Fgfr1/Fgf2/Tgfbr3/Rgs4/Edn1/Gja1/Tgfbr2/Yap1/S1pr1/Ppara/Pim1/Meis1/Gata4	14
BP	GO:2001056	positive regulation of cysteine-type endopeptidase activity	14/997	131/28928	0.10687	3.10084	4.55315	0.000177204	0.00122346	0.00071934	S100a8/Bcl2l11/Ifi207/Tnfsf10/S100a9/Myc/Ccn1/F3/F2r/Acer2/Pmaip1/Acvr1c/Ifi213/Clec7a	14
BP	GO:0061844	antimicrobial humoral immune response mediated by antimicrobial peptide	16/997	164/28928	0.097561	2.83074	4.44201	0.000184527	0.00127242	0.000748124	Ccl2/Cxcl5/Cxcl2/Ccl3/Cxcl1/S100a9/Ppl/Ccl7/Adm/Ccl11/Pf4/Cxcl3/Cxcl10/Nts/Tac1/Vip	16
BP	GO:0009166	nucleotide catabolic process	17/997	181/28928	0.0939227	2.72517	4.39877	0.000186515	0.00128452	0.000755236	Ada/Ier3/Myc/Hif1a/Pfkfb3/Ddit4/Art2b/Dpyd/Art2a/Ogt/Entpd1/Slc4a4/Ppara/Nudt12/Nt5e/Cbfa2t3/Cda	17
BP	GO:0008202	steroid metabolic process	27/997	366/28928	0.0737705	2.14045	4.14839	0.000193534	0.00132952	0.000781692	Ch25h/Errfi1/Dab2/Egr1/Fgfr1/Schip1/Tiparp/Cyp2r1/Gpr146/Nr5a2/Adm/Il1a/Rorc/Hsd17b2/H6pd/Slc27a2/Ldlrap1/Por/Tspo/Fgfr4/Sec14l2/Insig2/Ednrb/Npc1l1/Gal/Dgat2/Fgf15	27
BP	GO:0032956	regulation of actin cytoskeleton organization	27/997	366/28928	0.0737705	2.14045	4.14839	0.000193534	0.00132952	0.000781692	Rnd1/Rnd3/Csf3/Icam1/Baiap2/Fam107a/Sh3pxd2b/Sdc4/Rnh1/Rgcc/Il1a/Tacr1/Ccl11/Cdc42ep3/Ssh1/Rgs4/Edn1/Bbs4/Gja1/Plek/Cracd/S1pr1/Cdc42ep2/Tac1/Id1/Fermt2/Myo1c	27
BP	GO:0048286	lung alveolus development	10/997	73/28928	0.136986	3.97466	4.80778	0.000196256	0.00134342	0.000789866	Errfi1/Ada/Foxf1/Stk40/Pdpn/Fgfr4/Tnrc6c/Slc7a11/Lif/Mmp12	10
BP	GO:0003401	axis elongation	7/997	36/28928	0.194444	5.64181	5.2651	0.000196783	0.00134342	0.000789866	Areg/Rdh10/Spry2/Spry1/Yap1/Tnc/Sox9	7
BP	GO:0034698	response to gonadotropin	7/997	36/28928	0.194444	5.64181	5.2651	0.000196783	0.00134342	0.000789866	Inhbb/Tgfbr3/Gclc/Pappa/Edn1/Ctsl/Gata4	7
BP	GO:0061384	heart trabecula morphogenesis	7/997	36/28928	0.194444	5.64181	5.2651	0.000196783	0.00134342	0.000789866	Adamts1/Nrg1/Fhl2/Tgfbr3/Eng/Ube4b/S1pr1	7
BP	GO:0097421	liver regeneration	7/997	36/28928	0.194444	5.64181	5.2651	0.000196783	0.00134342	0.000789866	Hmox1/Il6/Ptch1/Il10/Cebpb/Cpt1a/Slc7a5	7
BP	GO:0072132	mesenchyme morphogenesis	9/997	60/28928	0.15	4.35226	4.91089	0.000201743	0.00137557	0.00080877	Myc/Fgfr1/Foxf1/Tbx3/Eng/Tgfbr2/Sox9/Osr1/Cplane2	9
BP	GO:0002832	negative regulation of response to biotic stimulus	15/997	149/28928	0.100671	2.92098	4.44154	0.000205693	0.00139902	0.000822557	Ccr1/Trib1/Ifi207/Havcr2/Irak3/Tnfaip3/Acod1/Sfn/Ifi213/Parp14/Stat2/Mavs/Pim1/Klrb1b/Mmp12	15
BP	GO:0010950	positive regulation of endopeptidase activity	15/997	149/28928	0.100671	2.92098	4.44154	0.000205693	0.00139902	0.000822557	S100a8/Bcl2l11/Ifi207/Tnfsf10/S100a9/Myc/Ccn1/Epha4/F3/F2r/Acer2/Pmaip1/Acvr1c/Ifi213/Clec7a	15
BP	GO:0030194	positive regulation of blood coagulation	6/997	26/28928	0.230769	6.69578	5.48949	0.000210249	0.00142291	0.000836606	Thbs1/Plat/S100a9/F2r/Serpine1/Plau	6
BP	GO:0042474	middle ear morphogenesis	6/997	26/28928	0.230769	6.69578	5.48949	0.000210249	0.00142291	0.000836606	Myc/Fgfr1/Edn1/Insig2/Osr1/Osr2	6
BP	GO:0051043	regulation of membrane protein ectodomain proteolysis	6/997	26/28928	0.230769	6.69578	5.48949	0.000210249	0.00142291	0.000836606	Tnfrsf1b/Il10/Adam8/Timp3/Il1b/Timp1	6
BP	GO:1900048	positive regulation of hemostasis	6/997	26/28928	0.230769	6.69578	5.48949	0.000210249	0.00142291	0.000836606	Thbs1/Plat/S100a9/F2r/Serpine1/Plau	6
BP	GO:0032306	regulation of prostaglandin secretion	5/997	17/28928	0.294118	8.53384	5.87037	0.000210764	0.00142291	0.000836606	Ptges/Il1a/Il1b/Edn1/Acsl4	5
BP	GO:1902001	fatty acid transmembrane transport	5/997	17/28928	0.294118	8.53384	5.87037	0.000210764	0.00142291	0.000836606	Thbs1/Abcc1/Slc2a1/Irs2/Slc27a1	5
BP	GO:0055023	positive regulation of cardiac muscle tissue growth	8/997	48/28928	0.166667	4.83584	5.02503	0.000214687	0.00144762	0.000851134	Nrg1/Fgfr1/Fgf2/Tgfbr3/Edn1/Yap1/Pim1/Gata4	8
BP	GO:2000514	regulation of CD4-positive, alpha-beta T cell activation	11/997	88/28928	0.125	3.62688	4.66273	0.00021893	0.00147441	0.000866886	Il4ra/Il6/Cd44/Runx1/Anxa1/Shb/Cd160/Cblb/Pf4/Tgfbr2/Zc3h12a	11
BP	GO:1900182	positive regulation of protein localization to nucleus	12/997	103/28928	0.116505	3.38039	4.57234	0.000225577	0.00151732	0.000892112	Il6/Trim8/Ptgs2/Ogt/Edn1/Yap1/Bag3/Dtx3l/Mavs/Chp2/Zc3h12a/Fermt2	12
BP	GO:0071383	cellular response to steroid hormone stimulus	19/997	219/28928	0.086758	2.51729	4.25831	0.00022646	0.00152139	0.000894507	Ccl2/Errfi1/Stc1/Dab2/Fam107a/Ddit4/Axin2/Anxa1/Per1/Gdnf/Prmt2/Lmo3/Skp2/Klf9/Edn1/Acod1/Ppara/Cry2/Abhd2	19
BP	GO:0051701	biological process involved in interaction with host	16/997	167/28928	0.0958084	2.77988	4.35817	0.000227293	0.00152511	0.000896696	Ch25h/Bcl2l11/Icam1/Trim30d/Trim8/Slc7a1/Ifitm1/Axl/Trim12c/Vps37b/Gbp2b/Ifitm6/Ppara/Trim34b/Trim6/Gbp2	16
BP	GO:0031098	stress-activated protein kinase signaling cascade	9/997	61/28928	0.147541	4.28091	4.84634	0.000229507	0.00153621	0.000903219	Errfi1/Map3k13/Il1a/Map2k3/Il1b/Cryab/Sema4c/Inava/Clec7a	9
BP	GO:0034113	heterotypic cell-cell adhesion	9/997	61/28928	0.147541	4.28091	4.84634	0.000229507	0.00153621	0.000903219	Itga5/Gcnt2/Cd44/Il10/Il1rn/Ninj1/Cd200l1/Il1b/Tnfaip3	9
BP	GO:0032967	positive regulation of collagen biosynthetic process	7/997	37/28928	0.189189	5.48933	5.16247	0.000235535	0.00157463	0.000925811	Ccl2/Vim/Rgcc/Eng/Myb/F2r/Serpine1	7
BP	GO:0046165	alcohol biosynthetic process	15/997	151/28928	0.0993377	2.88229	4.38135	0.000238136	0.00158622	0.000932625	Sphk1/Dab2/Ip6k2/Itpkb/Cyp2r1/Gpr146/Itpkc/Ptafr/H6pd/Acer2/Plek/Por/Sec14l2/Insig2/Npc1l1	15
BP	GO:0051099	positive regulation of binding	15/997	151/28928	0.0993377	2.88229	4.38135	0.000238136	0.00158622	0.000932625	Abl2/Plaur/Epha4/Ip6k2/Rb1/Irf4/Niban2/Rapgef2/Agrn/Sting1/Fam220a/Dtx3l/Mavs/Trim6/Traf6	15
BP	GO:0120161	regulation of cold-induced thermogenesis	15/997	151/28928	0.0993377	2.88229	4.38135	0.000238136	0.00158622	0.000932625	Il4ra/Gadd45g/Lcn2/Rb1/Irf4/Ogt/Cebpb/Il15/Prlr/Gja1/Prkab2/Pdgfc/Arrdc3/Adrb2/Id1	15
BP	GO:0010660	regulation of muscle cell apoptotic process	13/997	119/28928	0.109244	3.16971	4.48092	0.000239939	0.0015963	0.000938547	Hmox1/Nr4a3/Nrg1/Ptpn1/Trem1/Capn2/Edn1/Cxcr2/Bag3/Slc7a5/Igfbp3/Zc3h12a/Gata4	13
BP	GO:0001938	positive regulation of endothelial cell proliferation	12/997	104/28928	0.115385	3.34789	4.53183	0.000247131	0.00163817	0.000963169	Hmox1/Ccl2/Il10/Fgfr1/Nr4a1/Nrarp/Pgf/Fgf2/F3/Ccl11/Ecm1/Vip	12
BP	GO:0071260	cellular response to mechanical stimulus	12/997	104/28928	0.115385	3.34789	4.53183	0.000247131	0.00163817	0.000963169	Fgf2/Slc2a1/Tlr3/Ptgs2/Eng/Gclc/Il1b/Gja1/Bag3/Tlr8/Gadd45a/Sox9	12
BP	GO:2001237	negative regulation of extrinsic apoptotic signaling pathway	12/997	104/28928	0.115385	3.34789	4.53183	0.000247131	0.00163817	0.000963169	Hmox1/Nrg1/Dab2/Icam1/Hspa1b/Gdnf/Gclc/Lmna/Il1b/Tnfaip3/Yap1/Serpine1	12
BP	GO:1905521	regulation of macrophage migration	8/997	49/28928	0.163265	4.73715	4.94656	0.000248904	0.00164704	0.000968384	Thbs1/Ccl2/Csf1/Cx3cr1/Bcr/Trem1/Il34/C5ar1	8
BP	GO:0051918	negative regulation of fibrinolysis	4/997	10/28928	0.4	11.606	6.33759	0.00024937	0.00164704	0.000968384	Thbs1/Plat/Serpine1/Plau	4
BP	GO:1902746	regulation of lens fiber cell differentiation	4/997	10/28928	0.4	11.606	6.33759	0.00024937	0.00164704	0.000968384	Spry2/Fgf2/Spry1/Spred1	4
BP	GO:0071248	cellular response to metal ion	18/997	203/28928	0.08867	2.57276	4.24852	0.000250879	0.00165425	0.000972624	Fosb/Hmox1/Mt2/Lig4/Clic4/Junb/Inhbb/Cpne8/Itpkb/Ptgs2/Itpkc/Zfp616/Mt1/Edn1/Jund/Tspo/Slc11a1/Chp2	18
BP	GO:0007548	sex differentiation	27/997	372/28928	0.0725806	2.10593	4.05608	0.000251065	0.00165425	0.000972624	Adamts1/Tnfaip6/Rdh10/Bcl2l11/Tnfsf10/Icam1/Ereg/Adam4/Schip1/Inhbb/Runx1/Gm4787/Tbx3/Tlr3/Axl/Tiparp/Il1a/Adgrg1/Cebpb/Gja1/Ctsl/Nr2f2/Serpine1/Sox9/Osr1/Gata4/Mertk	27
BP	GO:0045165	cell fate commitment	24/997	314/28928	0.0764331	2.21771	4.09898	0.000255472	0.00168127	0.000988509	Nrg1/Il6/Ets2/Ptch1/Spry2/Fgfr1/Sh3pxd2b/Bcl11b/Fgf2/Runx1/Tbx3/Ntf3/Pdpn/Irf4/Sox6/Bhlha15/Edn1/Ctsl/Nr2f2/Tead4/Sox9/Gata4/Flvcr2/Prkdc	24
BP	GO:1904892	regulation of receptor signaling pathway via STAT	13/997	120/28928	0.108333	3.1433	4.44501	0.000260747	0.00171392	0.00100771	Cxcl5/Il6/Socs3/Cish/Il10/Cenpj/F2r/Ptprd/Prlr/Parp14/Gadd45a/Lif/Bcl3	13
BP	GO:0030500	regulation of bone mineralization	11/997	90/28928	0.122222	3.54628	4.5709	0.000267391	0.0017555	0.00103215	Ccr1/Ccn1/Hif1a/Gja1/S1pr1/Tmem119/Adrb2/Sox9/Osr1/Ecm1/Osr2	11
BP	GO:0030168	platelet activation	12/997	105/28928	0.114286	3.31601	4.4918	0.000270409	0.00177107	0.0010413	Selp/Il6/Rap2b/Axl/Pdpn/F2r/Entpd1/Plek/Pf4/Slc7a11/Fcer1g/Mertk	12
BP	GO:0060021	roof of mouth development	12/997	105/28928	0.114286	3.31601	4.4918	0.000270409	0.00177107	0.0010413	Csrnp1/Fzd2/Schip1/Tbx3/Tiparp/Tgfbr3/Lrrc32/Tgfbr2/Insig2/Meox2/Osr1/Osr2	12
BP	GO:0006694	steroid biosynthetic process	17/997	187/28928	0.0909091	2.63773	4.24491	0.000275014	0.00179908	0.00105777	Ch25h/Errfi1/Dab2/Egr1/Cyp2r1/Gpr146/Il1a/Hsd17b2/H6pd/Slc27a2/Por/Tspo/Fgfr4/Sec14l2/Insig2/Npc1l1/Fgf15	17
BP	GO:2000045	regulation of G1/S transition of mitotic cell cycle	16/997	170/28928	0.0941176	2.73083	4.27617	0.0002784	0.00181905	0.00106952	Adamts1/Fam107a/Cenpj/Bcl7a/Anxa1/Plk3/Rgcc/Rb1/Ccne2/Pdpn/Klf11/Prmt2/Ctdsp1/Lsm10/Sde2/Prkdc	16
BP	GO:0002438	acute inflammatory response to antigenic stimulus	7/997	38/28928	0.184211	5.34488	5.06351	0.000280202	0.00182648	0.00107388	Icam1/Il20rb/Fcgr3/Bdkrb2/Cxcr2/Fcgr2b/Fcer1g	7
BP	GO:1904994	regulation of leukocyte adhesion to vascular endothelial cell	7/997	38/28928	0.184211	5.34488	5.06351	0.000280202	0.00182648	0.00107388	Selp/Il6/Icam1/Sele/Ptafr/Gcnt1/Traf6	7
BP	GO:0010755	regulation of plasminogen activation	5/997	18/28928	0.277778	8.05973	5.66052	0.00028357	0.00184623	0.0010855	Thbs1/Plat/Plaur/Serpine1/Plau	5
BP	GO:0002762	negative regulation of myeloid leukocyte differentiation	9/997	63/28928	0.142857	4.14501	4.72131	0.000294587	0.00190821	0.00112194	Tnfaip6/Lilrb4b/Lilrb4a/Ccl3/Trib1/Myc/Tnfrsf11b/Runx1/Tjp2	9
BP	GO:0010712	regulation of collagen metabolic process	9/997	63/28928	0.142857	4.14501	4.72131	0.000294587	0.00190821	0.00112194	Ccl2/Errfi1/Il6/Vim/Rgcc/Eng/Myb/F2r/Serpine1	9
BP	GO:1902622	regulation of neutrophil migration	9/997	63/28928	0.142857	4.14501	4.72131	0.000294587	0.00190821	0.00112194	Tnfaip6/Adam8/Il1r1/Il1a/Il1b/Edn1/Cxcr2/C5ar1/Tirap	9
BP	GO:0006809	nitric oxide biosynthetic process	11/997	91/28928	0.120879	3.50731	4.52596	0.00029483	0.00190821	0.00112194	Il6/Icam1/Il10/Cx3cr1/Ptgs2/Il1b/Nos2/Por/Tspo/Clec7a/Zc3h12a	11
BP	GO:0050766	positive regulation of phagocytosis	11/997	91/28928	0.120879	3.50731	4.52596	0.00029483	0.00190821	0.00112194	Ccl2/Bcr/Fcgr3/Il15/Il2rb/Slc11a1/Fcgr2b/Clec7a/Mex3b/Fcer1g/Mertk	11
BP	GO:0006631	fatty acid metabolic process	32/997	478/28928	0.0669456	1.94243	3.92535	0.000304848	0.00197073	0.00115869	Sphk1/Mblac2/Ptgs1/Scd2/Anxa1/Ptges/Ptgs2/Acnat1/Pdpn/Avpr1a/Il1b/Pdk4/Edn1/Crot/Slc27a2/Cpt1a/Aloxe3/Por/Acsl4/Ppara/Hacd4/Prkab2/Acnat2/Insig2/Irs2/Mfsd2a/Ptgr1/Sox9/Abhd2/Slc27a1/Dgat2/Ces2a	32
BP	GO:0003014	renal system process	14/997	138/28928	0.101449	2.94356	4.32386	0.000305634	0.00197348	0.00116031	Stc1/Dab2/Aqp7/Adm/Bcr/F2r/Adgrf5/Tacr1/Edn1/Btc/Abcg2/Gja1/Ednrb/Adrb2	14
BP	GO:0062208	positive regulation of pattern recognition receptor signaling pathway	10/997	77/28928	0.12987	3.76819	4.59533	0.000306163	0.00197457	0.00116095	Cd14/Hspa1b/Ninj1/Atat1/Mfhas1/Znrf1/Slc15a3/Mavs/Gbp2/Tirap	10
BP	GO:0106106	cold-induced thermogenesis	15/997	155/28928	0.0967742	2.80791	4.26389	0.000316463	0.0020386	0.0011986	Il4ra/Gadd45g/Lcn2/Rb1/Irf4/Ogt/Cebpb/Il15/Prlr/Gja1/Prkab2/Pdgfc/Arrdc3/Adrb2/Id1	15
BP	GO:0002456	T cell mediated immunity	16/997	172/28928	0.0930233	2.69907	4.22249	0.000317745	0.00204446	0.00120204	Lilrb4b/Lilrb4a/Il6/Icam1/Tnfrsf1b/Stx11/Ripk3/Pvr/Il1r1/Il18rap/Cd80/Arid5a/Il20rb/Il1b/Slc11a1/Traf6	16
BP	GO:0071214	cellular response to abiotic stimulus	28/997	398/28928	0.0703518	2.04126	3.9519	0.000323218	0.00207481	0.00121989	Ifi207/Egr1/Lig4/Nlrp1b/Fgf2/Ninj1/Slc2a1/Tlr3/Ptgs2/Eng/Gclc/Avpr1a/Il1b/Cryab/Mmp3/Ptafr/Timp1/Bdkrb2/Gja1/Yap1/Ifi213/Tspo/Bag3/Tlr8/Gadd45a/Poli/Sox9/Sde2	28
BP	GO:0104004	cellular response to environmental stimulus	28/997	398/28928	0.0703518	2.04126	3.9519	0.000323218	0.00207481	0.00121989	Ifi207/Egr1/Lig4/Nlrp1b/Fgf2/Ninj1/Slc2a1/Tlr3/Ptgs2/Eng/Gclc/Avpr1a/Il1b/Cryab/Mmp3/Ptafr/Timp1/Bdkrb2/Gja1/Yap1/Ifi213/Tspo/Bag3/Tlr8/Gadd45a/Poli/Sox9/Sde2	28
BP	GO:2000272	negative regulation of signaling receptor activity	6/997	28/28928	0.214286	6.21751	5.21854	0.000324387	0.00207744	0.00122144	Lilrb4b/Lilrb4a/Errfi1/Ramp3/Gprc5a/Ppara	6
BP	GO:2000273	positive regulation of signaling receptor activity	6/997	28/28928	0.214286	6.21751	5.21854	0.000324387	0.00207744	0.00122144	Ccl2/Il10/Arc/Hif1a/Edn1/Adrb2	6
BP	GO:0010837	regulation of keratinocyte proliferation	8/997	51/28928	0.156863	4.55138	4.79581	0.000330749	0.00211265	0.00124214	Stxbp4/Ptch1/Bcl11b/Ovol1/Klf9/Sfn/Ctsl/Yap1	8
BP	GO:0060421	positive regulation of heart growth	8/997	51/28928	0.156863	4.55138	4.79581	0.000330749	0.00211265	0.00124214	Nrg1/Fgfr1/Fgf2/Tgfbr3/Edn1/Yap1/Pim1/Gata4	8
BP	GO:0001773	myeloid dendritic cell activation	7/997	39/28928	0.179487	5.20783	4.96798	0.000331426	0.00211265	0.00124214	Havcr2/Il10/Irf4/Batf2/Clec4d/Tgfbr2/Traf6	7
BP	GO:0060441	epithelial tube branching involved in lung morphogenesis	7/997	39/28928	0.179487	5.20783	4.96798	0.000331426	0.00211265	0.00124214	Rdh10/Spry2/Foxf1/Spry1/Yap1/Tnc/Sox9	7
BP	GO:2000648	positive regulation of stem cell proliferation	9/997	64/28928	0.140625	4.08024	4.66071	0.000332442	0.00211666	0.0012445	Cxcl1/Fgfr1/Fgf2/Tbx3/Taf4b/Gja1/Sox9/Osr2/Fermt2	9
BP	GO:0060612	adipose tissue development	10/997	78/28928	0.128205	3.71988	4.54443	0.000340495	0.00216542	0.00127317	Errfi1/Klf7/Csf1/Sh3pxd2b/Lmna/Rorc/Bbs4/Arrdc3/Dgat2/Slc25a25	10
BP	GO:0043280	positive regulation of cysteine-type endopeptidase activity involved in apoptotic process	12/997	108/28928	0.111111	3.22389	4.37457	0.000351723	0.00223424	0.00131363	S100a8/Bcl2l11/Tnfsf10/S100a9/Myc/Ccn1/F3/F2r/Acer2/Pmaip1/Acvr1c/Clec7a	12
BP	GO:0050708	regulation of protein secretion	25/997	341/28928	0.0733138	2.1272	3.95595	0.000360356	0.00228642	0.00134431	Il6/Stxbp4/Hcar2/Klf7/Hif1a/Ccn3/Glul/Inhbb/Anxa1/Rhbdf1/Lrrc8a/Il1a/F2r/Rfx3/Pim3/Il1b/Nos2/Gja1/Cpt1a/Acvr1c/A1cf/Acsl4/Oga/Irs2/Midn	25
BP	GO:0060047	heart contraction	20/997	246/28928	0.0813008	2.35895	4.04409	0.000369057	0.00233892	0.00137518	Kcne4/Stc1/Ada/Kcne3/Pln/Adm/Ptpn1/Avpr1a/Map2k3/Rgs4/Agrn/Edn1/Gja1/Hcn4/Ednrb/Adrb2/Zc3h12a/Tac1/Scn3b/Gata4	20
BP	GO:0038093	Fc receptor signaling pathway	5/997	19/28928	0.263158	7.63554	5.46629	0.000373966	0.00235534	0.00138483	Nr4a3/Fcgr3/Clec4d/Clec4e/Fcer1g	5
BP	GO:0070243	regulation of thymocyte apoptotic process	5/997	19/28928	0.263158	7.63554	5.46629	0.000373966	0.00235534	0.00138483	Ada/Adam8/Hif1a/Bcl11b/Rorc	5
BP	GO:0043616	keratinocyte proliferation	9/997	65/28928	0.138462	4.01747	4.60134	0.000374225	0.00235534	0.00138483	Stxbp4/Ptch1/Ereg/Bcl11b/Ovol1/Klf9/Sfn/Ctsl/Yap1	9
BP	GO:0045071	negative regulation of viral genome replication	9/997	65/28928	0.138462	4.01747	4.60134	0.000374225	0.00235534	0.00138483	Ifi207/Ifitm1/Plscr1/Tasor/Ifitm6/Ifi213/Mavs/Trim6/Oasl2	9
BP	GO:0050850	positive regulation of calcium-mediated signaling	9/997	65/28928	0.138462	4.01747	4.60134	0.000374225	0.00235534	0.00138483	Nrg1/Ccl3/Ada/Ramp3/Ppp3cc/Lmcd1/Edn1/Clec7a/Chp2	9
BP	GO:1905953	negative regulation of lipid localization	9/997	65/28928	0.138462	4.01747	4.60134	0.000374225	0.00235534	0.00138483	Thbs1/Nrg1/Nfkbia/Acsl4/Ppara/Tspo/Irs2/Cry2/Igfbp3	9
BP	GO:0046434	organophosphate catabolic process	21/997	265/28928	0.0792453	2.29931	4.01448	0.000375744	0.00235849	0.00138668	Ada/Ier3/Myc/Hif1a/Pfkfb3/Ddit4/Art2b/Dpyd/Art2a/Pld2/Ogt/Entpd1/Slc4a4/Ppara/Nudt12/Nt5e/Prdx6/Pla2g7/Cbfa2t3/Napepld/Cda	21
BP	GO:0110053	regulation of actin filament organization	22/997	284/28928	0.0774648	2.24764	3.99199	0.000377459	0.00235849	0.00138668	Csf3/Icam1/Baiap2/Sh3pxd2b/Sdc4/Rnh1/Rgcc/Tacr1/Ccl11/Cdc42ep3/Ssh1/Rgs4/Bbs4/Gja1/Plek/Cracd/S1pr1/Cdc42ep2/Tac1/Id1/Fermt2/Myo1c	22
BP	GO:0048146	positive regulation of fibroblast proliferation	10/997	79/28928	0.126582	3.67279	4.49437	0.000377978	0.00235849	0.00138668	Sphk1/Ereg/Myc/Lig4/Myb/Btc/Serpine1/Pdgfc/Lif/Prkdc	10
BP	GO:0019730	antimicrobial humoral response	18/997	210/28928	0.0857143	2.487	4.08602	0.000379075	0.00235849	0.00138668	Ccl2/Cxcl5/Cxcl2/Ccl3/Cxcl1/S100a9/Ppl/Ccl7/Adm/Ccl11/Acod1/Pf4/Cxcl3/Cxcl10/Nts/Tac1/Vip/Bcl3	18
BP	GO:0071453	cellular response to oxygen levels	18/997	210/28928	0.0857143	2.487	4.08602	0.000379075	0.00235849	0.00138668	Stc1/Myc/Epha4/Adam8/Hif1a/Cysltr1/Plk3/Hilpda/Ptgs2/Rgcc/Ptpn1/Ptprd/Lmna/Ogt/Ndrg1/Edn1/Stc2/Adrb2	18
BP	GO:0003197	endocardial cushion development	8/997	52/28928	0.153846	4.46385	4.72333	0.000379211	0.00235849	0.00138668	Thbs1/Foxf1/Tbx3/Eng/Tgfbr2/Sox9/Gata4/Cplane2	8
BP	GO:0048536	spleen development	8/997	52/28928	0.153846	4.46385	4.72333	0.000379211	0.00235849	0.00138668	Bcl2l11/Ripk3/Myb/Samd9l/Slc40a1/Nfkb2/Prkdc/Bcl3	8
BP	GO:0050732	negative regulation of peptidyl-tyrosine phosphorylation	8/997	52/28928	0.153846	4.46385	4.72333	0.000379211	0.00235849	0.00138668	Lilrb4b/Lilrb4a/Errfi1/Socs3/Ntf3/Ptpn1/Gprc5a/Parp14	8
BP	GO:1902624	positive regulation of neutrophil migration	8/997	52/28928	0.153846	4.46385	4.72333	0.000379211	0.00235849	0.00138668	Adam8/Il1r1/Il1a/Il1b/Edn1/Cxcr2/C5ar1/Tirap	8
BP	GO:0035744	T-helper 1 cell cytokine production	4/997	11/28928	0.363636	10.5509	5.98579	0.00038118	0.00235849	0.00138668	Il1r1/Il18rap/Arid5a/Il1b	4
BP	GO:0060613	fat pad development	4/997	11/28928	0.363636	10.5509	5.98579	0.00038118	0.00235849	0.00138668	Errfi1/Bbs4/Arrdc3/Dgat2	4
BP	GO:0072203	cell proliferation involved in metanephros development	4/997	11/28928	0.363636	10.5509	5.98579	0.00038118	0.00235849	0.00138668	Ptch1/Egr1/Myc/Osr1	4
BP	GO:0090269	fibroblast growth factor production	4/997	11/28928	0.363636	10.5509	5.98579	0.00038118	0.00235849	0.00138668	Fgfr1/Ptgs2/Rgcc/Fgfr4	4
BP	GO:0090270	regulation of fibroblast growth factor production	4/997	11/28928	0.363636	10.5509	5.98579	0.00038118	0.00235849	0.00138668	Fgfr1/Ptgs2/Rgcc/Fgfr4	4
BP	GO:2001280	positive regulation of unsaturated fatty acid biosynthetic process	4/997	11/28928	0.363636	10.5509	5.98579	0.00038118	0.00235849	0.00138668	Anxa1/Ptgs2/Avpr1a/Il1b	4
BP	GO:0070167	regulation of biomineral tissue development	12/997	109/28928	0.110092	3.19432	4.3364	0.000383053	0.00236742	0.00139193	Ccr1/Ccn1/Hif1a/Cebpb/Gja1/S1pr1/Tmem119/Adrb2/Sox9/Osr1/Ecm1/Osr2	12
BP	GO:0007588	excretion	7/997	40/28928	0.175	5.07763	4.87568	0.00038989	0.00240155	0.001412	Stc1/Schip1/Tiparp/Tacr1/Edn1/Abcg2/Ednrb	7
BP	GO:0010714	positive regulation of collagen metabolic process	7/997	40/28928	0.175	5.07763	4.87568	0.00038989	0.00240155	0.001412	Ccl2/Vim/Rgcc/Eng/Myb/F2r/Serpine1	7
BP	GO:2000515	negative regulation of CD4-positive, alpha-beta T cell activation	7/997	40/28928	0.175	5.07763	4.87568	0.00038989	0.00240155	0.001412	Il4ra/Cd44/Runx1/Anxa1/Cblb/Pf4/Zc3h12a	7
BP	GO:0032418	lysosome localization	11/997	94/28928	0.117021	3.39538	4.39482	0.000391772	0.00240503	0.00141405	Hmox1/Nr4a3/Il4ra/D6Wsu163e/Foxf1/Gab2/Rabgef1/Pld2/Ndel1/Rasgrp1/Fcer1g	11
BP	GO:1903321	negative regulation of protein modification by small protein conjugation or removal	11/997	94/28928	0.117021	3.39538	4.39482	0.000391772	0.00240503	0.00141405	Spry2/Hspa1b/Prkcg/Gclc/Sqstm1/Ogt/Bag2/Tnfaip3/Rasd2/Tspo/Dtx3l	11
BP	GO:1990849	vacuolar localization	11/997	94/28928	0.117021	3.39538	4.39482	0.000391772	0.00240503	0.00141405	Hmox1/Nr4a3/Il4ra/D6Wsu163e/Foxf1/Gab2/Rabgef1/Pld2/Ndel1/Rasgrp1/Fcer1g	11
BP	GO:0007188	adenylate cyclase-modulating G protein-coupled receptor signaling pathway	21/997	266/28928	0.0789474	2.29066	3.99536	0.000395024	0.00242228	0.00142419	Akap12/Gpr4/Ramp3/Pln/Gpr171/Calca/Gpr146/Adm/Adgrf5/Rapgef2/Chrm4/Adgrg1/Adcy4/Edn1/Pf4/S1pr1/S1pr3/Cxcl10/Arrdc3/Adrb2/Vip	21
BP	GO:0034755	iron ion transmembrane transport	6/997	29/28928	0.206897	6.00311	5.09277	0.000397166	0.00242998	0.00142872	Lcn2/Slc25a28/Hif1a/Steap4/Slc40a1/Slc11a1	6
BP	GO:1903579	negative regulation of ATP metabolic process	6/997	29/28928	0.206897	6.00311	5.09277	0.000397166	0.00242998	0.00142872	Ier3/Ddit4/Entpd1/Ppara/Tspo/Cbfa2t3	6
BP	GO:0015698	inorganic anion transport	16/997	176/28928	0.0909091	2.63773	4.11738	0.000411019	0.00251194	0.0014769	Fgfr1/Clic4/Ip6k2/Kcnk1/Slc12a4/Lrrc8a/Cebpb/Slc4a4/Slc13a1/Tspo/Fgfr4/Slc11a1/Stc2/Cry2/P2ry4/Slc34a2	16
BP	GO:0010952	positive regulation of peptidase activity	15/997	159/28928	0.0943396	2.73727	4.15011	0.000415996	0.00253822	0.00149235	S100a8/Bcl2l11/Ifi207/Tnfsf10/S100a9/Myc/Ccn1/Epha4/F3/F2r/Acer2/Pmaip1/Acvr1c/Ifi213/Clec7a	15
BP	GO:0010586	miRNA metabolic process	12/997	110/28928	0.109091	3.16528	4.29867	0.000416709	0.00253822	0.00149235	Lilrb4b/Lilrb4a/Fosl1/Egr1/Myc/Il10/Hif1a/Myb/Ppara/Sox9/Zc3h12a/Gata4	12
BP	GO:2001243	negative regulation of intrinsic apoptotic signaling pathway	12/997	110/28928	0.109091	3.16528	4.29867	0.000416709	0.00253822	0.00149235	Hspb1/Cd44/Plaur/Il10/Hif1a/Fgf2/Ptgs2/Ackr3/Ptpn1/Bdkrb2/Gata4/Herpud1	12
BP	GO:0046620	regulation of organ growth	13/997	126/28928	0.103175	2.99362	4.23713	0.000420818	0.0025604	0.0015054	Nrg1/Bcl2l11/Fgfr1/Fgf2/Tgfbr3/Rgs4/Edn1/Gja1/Tgfbr2/Yap1/Ppara/Pim1/Gata4	13
BP	GO:0051146	striated muscle cell differentiation	26/997	365/28928	0.0712329	2.06683	3.8752	0.000430899	0.00261884	0.00153975	Sik1/Nrg1/Il4ra/Fhl2/Rcan1/Myc/Ccn3/Csrp1/Tbx3/Rb1/Flnc/Asb2/Sox6/Avpr1a/Lmna/Capn2/Rgs4/Bhlha15/Edn1/Ldb3/Ppara/Tmem119/Cxcl10/Meis1/Gata4/Bcl9	26
BP	GO:0032350	regulation of hormone metabolic process	8/997	53/28928	0.150943	4.37963	4.65267	0.000433293	0.00262176	0.00154147	Rdh10/Dab2/Egr1/Hif1a/H6pd/Por/Stc2/Gal	8
BP	GO:0045907	positive regulation of vasoconstriction	8/997	53/28928	0.150943	4.37963	4.65267	0.000433293	0.00262176	0.00154147	Icam1/Ptgs1/Cysltr1/Ptgs2/F2r/Tacr1/Avpr1a/Gja1	8
BP	GO:0046456	icosanoid biosynthetic process	8/997	53/28928	0.150943	4.37963	4.65267	0.000433293	0.00262176	0.00154147	Sphk1/Ptgs1/Anxa1/Ptges/Ptgs2/Avpr1a/Il1b/Edn1	8
BP	GO:0072538	T-helper 17 type immune response	8/997	53/28928	0.150943	4.37963	4.65267	0.000433293	0.00262176	0.00154147	Il6/Arid5a/Irf4/Rorc/Pf4/Clec7a/Zc3h12a/Il17ra	8
BP	GO:0051017	actin filament bundle assembly	16/997	177/28928	0.0903955	2.62283	4.09156	0.000437717	0.00264561	0.00155549	Abl2/Baiap2/Fam107a/Sh3pxd2b/Zyx/Sdc4/Rgcc/Tacr1/Fhdc1/Bbs4/Plek/S1pr1/Tac1/Id1/Limd2/Fermt2	16
BP	GO:1902903	regulation of supramolecular fiber organization	28/997	406/28928	0.0689655	2.00104	3.83777	0.000443691	0.00267876	0.00157499	Csf3/Icam1/Baiap2/Hspa1b/Hspa1a/Sh3pxd2b/Sdc4/Cdh5/Rnh1/Rgcc/Rb1/Tacr1/Ccl11/Cdc42ep3/Ssh1/Rgs4/Cryab/Edn1/Bbs4/Gja1/Plek/Cracd/S1pr1/Cdc42ep2/Tac1/Id1/Fermt2/Myo1c	28
BP	GO:0019915	lipid storage	12/997	111/28928	0.108108	3.13676	4.26137	0.000452826	0.00273091	0.00160564	Nfkbia/Hilpda/Zfyve1/Il1b/Plin2/Cpt1a/Cidec/Acvr1c/Ppara/Cry2/Zc3h12a/Dgat2	12
BP	GO:0032692	negative regulation of interleukin-1 production	7/997	41/28928	0.170732	4.95379	4.78641	0.000456314	0.0027459	0.00161446	Lilrb4b/Lilrb4a/Errfi1/Il1r2/Cx3cr1/Tnfaip3/Zc3h12a	7
BP	GO:2000191	regulation of fatty acid transport	7/997	41/28928	0.170732	4.95379	4.78641	0.000456314	0.0027459	0.00161446	Thbs1/Ptges/Il1a/Il1b/Edn1/Acsl4/Irs2	7
BP	GO:0033138	positive regulation of peptidyl-serine phosphorylation	10/997	81/28928	0.123457	3.5821	4.39665	0.000463291	0.00278177	0.00163555	Il6/Spry2/Cd44/Ip6k2/Ntf3/Ptgs2/Crebl2/Trim6/Lif/Osm	10
BP	GO:0043470	regulation of carbohydrate catabolic process	10/997	81/28928	0.123457	3.5821	4.39665	0.000463291	0.00278177	0.00163555	Ier3/Myc/Hif1a/Ddit4/Ogt/Ppp1r3c/Slc4a4/Ppara/Scarb2/Cbfa2t3	10
BP	GO:0050796	regulation of insulin secretion	19/997	232/28928	0.0818966	2.37623	3.97632	0.000467512	0.00280405	0.00164865	Il6/Stxbp4/Klf7/Hif1a/Ccn3/Glul/Inhbb/Lrrc8a/Rfx3/Pim3/Il1b/Nos2/Gja1/Cpt1a/Acvr1c/Acsl4/Oga/Irs2/Midn	19
BP	GO:0043154	negative regulation of cysteine-type endopeptidase activity involved in apoptotic process	9/997	67/28928	0.134328	3.89754	4.48609	0.00047081	0.00281767	0.00165666	Thbs1/Cd44/Plaur/Hspa1b/Nr4a1/Naip6/Ptgs2/Cryab/Bcl2a1d	9
BP	GO:0072348	sulfur compound transport	9/997	67/28928	0.134328	3.89754	4.48609	0.00047081	0.00281767	0.00165666	Abcc1/Lrrc8a/Slc16a6/Abcg2/Gja1/Slc13a1/Slc7a5/Slc7a11/Slc27a1	9
BP	GO:0051783	regulation of nuclear division	15/997	161/28928	0.0931677	2.70327	4.09453	0.000475092	0.00284019	0.0016699	Sphk1/Ereg/Zwint/Rgcc/Rb1/Il1a/Dusp1/Il1b/Edn1/Btc/Cdc20/Gja1/Prdm9/Lif/Osm	15
BP	GO:0046394	carboxylic acid biosynthetic process	24/997	328/28928	0.0731707	2.12305	3.86465	0.000481276	0.00286641	0.00168531	Sphk1/Rdh10/Errfi1/Nags/Glul/Ptgs1/Scd2/Anxa1/Aldh1a3/Ptges/Ptgs2/Dpyd/Avpr1a/Il1b/Pdk4/Edn1/Slc27a2/Aloxe3/Hacd4/Fgfr4/Prkab2/Insig2/Abhd2/Fgf15	24
BP	GO:0010955	negative regulation of protein processing	6/997	30/28928	0.2	5.80301	4.97274	0.000482092	0.00286641	0.00168531	Thbs1/Plat/Il1r2/Ctla2a/Serpine1/Plau	6
BP	GO:0032891	negative regulation of organic acid transport	6/997	30/28928	0.2	5.80301	4.97274	0.000482092	0.00286641	0.00168531	Thbs1/Il1rn/Il1b/Rgs4/Acsl4/Irs2	6
BP	GO:0046885	regulation of hormone biosynthetic process	6/997	30/28928	0.2	5.80301	4.97274	0.000482092	0.00286641	0.00168531	Dab2/Egr1/Hif1a/H6pd/Por/Stc2	6
BP	GO:1903318	negative regulation of protein maturation	6/997	30/28928	0.2	5.80301	4.97274	0.000482092	0.00286641	0.00168531	Thbs1/Plat/Il1r2/Ctla2a/Serpine1/Plau	6
BP	GO:0040037	negative regulation of fibroblast growth factor receptor signaling pathway	5/997	20/28928	0.25	7.25376	5.28571	0.000484538	0.00287783	0.00169203	Thbs1/Spry2/Spry4/Spry3/Spry1	5
BP	GO:0031330	negative regulation of cellular catabolic process	12/997	112/28928	0.107143	3.10875	4.22449	0.000491546	0.00291629	0.00171464	Hmox1/Il10/Timp3/Vps13c/Timp1/Tnfaip3/Zkscan3/Tspo/Slc7a5/Mfsd2a/Qsox1/Gata4	12
BP	GO:0046596	regulation of viral entry into host cell	8/997	54/28928	0.148148	4.29853	4.58373	0.000493471	0.00292455	0.0017195	Ch25h/Trim30d/Trim8/Ifitm1/Trim12c/Ifitm6/Trim34b/Trim6	8
BP	GO:0007584	response to nutrient	16/997	179/28928	0.0893855	2.59352	4.04045	0.00049561	0.00293405	0.00172509	Ccl2/Stc1/Ada/Lrat/Tnfrsf11b/Ptgs2/Il1a/Gclc/Dpyd/Ogt/Cpt1a/Ppara/Tspo/Stc2/Pim1/Tnc	16
BP	GO:0060348	bone development	20/997	252/28928	0.0793651	2.30278	3.92436	0.000502467	0.00297144	0.00174707	Thbs1/Stc1/Sh3pxd2b/Ttc9/Timp3/Ninj1/Axin2/Eng/Tjp2/Gja1/Tgfbr2/Por/Zbtb16/Tmem119/Insig2/Pdgfc/Sox9/Ecm1/Lox/Osr2	20
BP	GO:1901136	carbohydrate derivative catabolic process	21/997	271/28928	0.0774908	2.2484	3.90102	0.000504934	0.00298281	0.00175375	Ada/Ier3/Cd44/Myc/Hif1a/Pfkfb3/Fgf2/Ddit4/Cemip2/Dpyd/Ogt/Entpd1/Lyve1/Slc4a4/Ctsl/Ppara/Nt5e/Mmp12/Cbfa2t3/Dctd/Cda	21
BP	GO:0032273	positive regulation of protein polymerization	11/997	97/28928	0.113402	3.29037	4.26891	0.000514139	0.00303392	0.0017838	Csf3/Icam1/Baiap2/Hspa1b/Hspa1a/Ccl11/Cdc42ep3/Tppp/Cracd/Cdc42ep2/Myo1c	11
BP	GO:0045778	positive regulation of ossification	9/997	68/28928	0.132353	3.84023	4.43012	0.000526272	0.00309448	0.00181941	Ccn1/Ccn3/Tacr1/Zbtb16/Tmem119/Adrb2/Osr1/Tac1/Osr2	9
BP	GO:0007189	adenylate cyclase-activating G protein-coupled receptor signaling pathway	16/997	180/28928	0.0888889	2.57912	4.01515	0.000526939	0.00309448	0.00181941	Gpr4/Ramp3/Pln/Calca/Adm/Adgrf5/Rapgef2/Adgrg1/Adcy4/Pf4/S1pr1/S1pr3/Cxcl10/Arrdc3/Adrb2/Vip	16
BP	GO:0061572	actin filament bundle organization	16/997	180/28928	0.0888889	2.57912	4.01515	0.000526939	0.00309448	0.00181941	Abl2/Baiap2/Fam107a/Sh3pxd2b/Zyx/Sdc4/Rgcc/Tacr1/Fhdc1/Bbs4/Plek/S1pr1/Tac1/Id1/Limd2/Fermt2	16
BP	GO:0039531	regulation of cytoplasmic pattern recognition receptor signaling pathway	13/997	129/28928	0.100775	2.924	4.13777	0.000528049	0.00309448	0.00181941	Ifi207/Hspa1b/Rnf170/Atat1/Ogt/Rab7b/Tnfaip3/Slc15a3/Ifi213/Mavs/Gbp2/Tirap/Prkdc	13
BP	GO:0042752	regulation of circadian rhythm	13/997	129/28928	0.100775	2.924	4.13777	0.000528049	0.00309448	0.00181941	Sik1/Il6/Ada/Klf10/Csnk1e/Prkcg/Per1/Rorc/Bhlhe40/Ppara/Cry2/Sin3a/Prkdc	13
BP	GO:0045582	positive regulation of T cell differentiation	13/997	129/28928	0.100775	2.924	4.13777	0.000528049	0.00309448	0.00181941	Lilrb4b/Lilrb4a/Il4ra/Il6/Ada/Adam8/Il1rl2/Runx1/Anxa1/Itpkb/Shb/Tgfbr2/Rasgrp1	13
BP	GO:0043270	positive regulation of monoatomic ion transport	20/997	253/28928	0.0790514	2.29368	3.90473	0.000528353	0.00309448	0.00181941	Ccl2/Ccl3/Ccr1/Stc1/Cxcl1/Lcn2/Arc/Trpv3/Bdkrb1/F2r/Ppp3cc/Edn1/Serpine1/Tspo/Cxcl10/Oga/Hspa2/Adrb2/Gal/Scn3b	20
BP	GO:0032633	interleukin-4 production	7/997	42/28928	0.166667	4.83584	4.7	0.000531457	0.00310602	0.00182619	Havcr2/Il20rb/Irf4/Cebpb/Icosl/Slc7a5/Fcer1g	7
BP	GO:0048247	lymphocyte chemotaxis	7/997	42/28928	0.166667	4.83584	4.7	0.000531457	0.00310602	0.00182619	Ch25h/Ccl2/Ccl3/Adam8/Ccl7/Cxcl16/Cxcl10	7
BP	GO:0042102	positive regulation of T cell proliferation	12/997	113/28928	0.106195	3.08124	4.18802	0.000533015	0.00311181	0.0018296	Il6/Havcr2/Slc7a1/Anxa1/Cd80/Il1a/Cd86/Il1b/Il15/Tgfbr2/Icosl/Traf6	12
BP	GO:0006195	purine nucleotide catabolic process	15/997	163/28928	0.0920245	2.6701	4.03979	0.000541223	0.00315636	0.00185579	Ada/Ier3/Myc/Hif1a/Pfkfb3/Ddit4/Art2b/Art2a/Ogt/Entpd1/Slc4a4/Ppara/Nudt12/Nt5e/Cbfa2t3	15
BP	GO:1903828	negative regulation of protein localization	20/997	254/28928	0.0787402	2.28465	3.8852	0.000555388	0.0032163	0.00189104	Lilrb4b/Lilrb4a/Dab2/Klf7/Ccn3/Inhbb/Anxa1/Rhbdf1/Plk2/F2r/Mfhas1/Pim3/Il1b/Ogt/Sfn/Acvr1c/Bag3/Sp100/Sin3a/Midn	20
BP	GO:0031392	regulation of prostaglandin biosynthetic process	4/997	12/28928	0.333333	9.67168	5.6765	0.000556194	0.0032163	0.00189104	Anxa1/Ptgs2/Avpr1a/Il1b	4
BP	GO:0034144	negative regulation of toll-like receptor 4 signaling pathway	4/997	12/28928	0.333333	9.67168	5.6765	0.000556194	0.0032163	0.00189104	Mfhas1/Sqstm1/Rab7b/Acod1	4
BP	GO:0038094	Fc-gamma receptor signaling pathway	4/997	12/28928	0.333333	9.67168	5.6765	0.000556194	0.0032163	0.00189104	Fcgr3/Clec4d/Clec4e/Fcer1g	4
BP	GO:0051712	positive regulation of killing of cells of another organism	4/997	12/28928	0.333333	9.67168	5.6765	0.000556194	0.0032163	0.00189104	Bcl2l11/Cxcl1/Nos2/Clec7a	4
BP	GO:0060426	lung vasculature development	4/997	12/28928	0.333333	9.67168	5.6765	0.000556194	0.0032163	0.00189104	Errfi1/Foxf1/Lif/Id1	4
BP	GO:0070244	negative regulation of thymocyte apoptotic process	4/997	12/28928	0.333333	9.67168	5.6765	0.000556194	0.0032163	0.00189104	Ada/Hif1a/Bcl11b/Rorc	4
BP	GO:0097707	ferroptosis	4/997	12/28928	0.333333	9.67168	5.6765	0.000556194	0.0032163	0.00189104	Hmox1/Ninj1/Sqstm1/Slc7a11	4
BP	GO:0001706	endoderm formation	8/997	55/28928	0.145455	4.22037	4.51645	0.000560243	0.00323629	0.00190278	Itga5/Lama3/Dusp5/Dusp4/Dusp1/Mmp8/Tnrc6c/Gata4	8
BP	GO:0002260	lymphocyte homeostasis	11/997	98/28928	0.112245	3.25679	4.22803	0.000561421	0.00323629	0.00190278	Ada/Bcl2l11/Cd44/Ripk3/Hif1a/Il20rb/Bbs4/Tnfaip3/Pmaip1/Bcl2a1a/Slc40a1	11
BP	GO:1901874	negative regulation of post-translational protein modification	11/997	98/28928	0.112245	3.25679	4.22803	0.000561421	0.00323629	0.00190278	Spry2/Hspa1b/Prkcg/Gclc/Sqstm1/Ogt/Bag2/Tnfaip3/Rasd2/Tspo/Dtx3l	11
BP	GO:0016053	organic acid biosynthetic process	24/997	332/28928	0.0722892	2.09747	3.79985	0.000571736	0.00329229	0.00193571	Sphk1/Rdh10/Errfi1/Nags/Glul/Ptgs1/Scd2/Anxa1/Aldh1a3/Ptges/Ptgs2/Dpyd/Avpr1a/Il1b/Pdk4/Edn1/Slc27a2/Aloxe3/Hacd4/Fgfr4/Prkab2/Insig2/Abhd2/Fgf15	24
BP	GO:0002449	lymphocyte mediated immunity	32/997	496/28928	0.0645161	1.87194	3.70066	0.000575391	0.00330592	0.00194372	Lilrb4b/Lilrb4a/Il4ra/Il6/Icam1/Tnfrsf1b/Havcr2/Lig4/Stx11/Ripk3/Pvr/Il1r1/Csf3r/Csf2rb2/Il18rap/Cd80/Arid5a/Il20rb/Fcgr3/Csf2rb/Il1b/Aplf/Cd160/Il2rb/Slc11a1/Icosl/Fcgr2b/Rasgrp1/Klrb1b/Fcer1g/Bcl3/Traf6	32
BP	GO:1901987	regulation of cell cycle phase transition	31/997	475/28928	0.0652632	1.89361	3.71012	0.000575704	0.00330592	0.00194372	Adamts1/Stxbp4/Ier3/Fam107a/Cenpj/Bcl7a/Susd2/Anxa1/Plk3/Zwint/Rgcc/Rb1/Ccne2/Ovol1/Pdpn/Klf11/Prmt2/Dusp1/Rad51c/Cdc20/Ctdsp1/Donson/Nek6/Lsm10/Nek1/Dtx3l/Cirbp/Hspa2/Sde2/Sin3a/Prkdc	31
BP	GO:0009743	response to carbohydrate	22/997	293/28928	0.0750853	2.1786	3.83097	0.000575912	0.00330592	0.00194372	Thbs1/Ccl2/Stxbp4/Icam1/Egr1/Klf7/Hif1a/Glul/Ptgs2/Il1a/Gclc/Pim3/Map2k3/Il1b/Ogt/Gja1/Ctsl/Acvr1c/Ppara/Irs2/Sin3a/Hmga1	22
BP	GO:0006633	fatty acid biosynthetic process	15/997	164/28928	0.0914634	2.65382	4.01273	0.000577132	0.00330945	0.0019458	Sphk1/Ptgs1/Scd2/Anxa1/Ptges/Ptgs2/Avpr1a/Il1b/Pdk4/Edn1/Aloxe3/Hacd4/Prkab2/Insig2/Abhd2	15
BP	GO:0035767	endothelial cell chemotaxis	6/997	31/28928	0.193548	5.61582	4.85802	0.000580509	0.00331495	0.00194903	Thbs1/Hspb1/Fgfr1/Nr4a1/Ccn3/Fgf2	6
BP	GO:0036315	cellular response to sterol	6/997	31/28928	0.193548	5.61582	4.85802	0.000580509	0.00331495	0.00194903	Ptch1/Inhbb/Rorc/Gramd1a/Insig2/Lrp8	6
BP	GO:0050820	positive regulation of coagulation	6/997	31/28928	0.193548	5.61582	4.85802	0.000580509	0.00331495	0.00194903	Thbs1/Plat/S100a9/F2r/Serpine1/Plau	6
BP	GO:0070233	negative regulation of T cell apoptotic process	6/997	31/28928	0.193548	5.61582	4.85802	0.000580509	0.00331495	0.00194903	Ada/Hif1a/Bcl11b/Dock8/Rorc/Bcl3	6
BP	GO:0072523	purine-containing compound catabolic process	16/997	182/28928	0.0879121	2.55077	3.96507	0.000594715	0.00339254	0.00199465	Ada/Ier3/Myc/Hif1a/Pfkfb3/Ddit4/Art2b/Dpyd/Art2a/Ogt/Entpd1/Slc4a4/Ppara/Nudt12/Nt5e/Cbfa2t3	16
BP	GO:0090287	regulation of cellular response to growth factor stimulus	24/997	333/28928	0.0720721	2.09117	3.78379	0.000596546	0.00339944	0.00199871	Thbs1/Tnfaip6/Spry2/Ccn1/Hif1a/Sema6a/Fgf2/Spry4/Cdh5/Spry3/Tgfbr3/Eng/Ptpn1/Adamts3/Pmepa1/Ogt/Adgrg1/Spry1/Spred1/Ppara/Ptp4a3/Lox/Gata4/Sin3a	24
BP	GO:0010657	muscle cell apoptotic process	13/997	131/28928	0.0992366	2.87936	4.07312	0.000611687	0.00347849	0.00204519	Hmox1/Nr4a3/Nrg1/Ptpn1/Trem1/Capn2/Edn1/Cxcr2/Bag3/Slc7a5/Igfbp3/Zc3h12a/Gata4	13
BP	GO:1903052	positive regulation of proteolysis involved in protein catabolic process	13/997	131/28928	0.0992366	2.87936	4.07312	0.000611687	0.00347849	0.00204519	Trib1/Dab2/Csnk1e/Hspa1b/Hspa1a/Axin2/Plk3/Plk2/Gclc/Cdc20/Bag2/Cbfa2t3/Herpud1	13
BP	GO:0002446	neutrophil mediated immunity	7/997	43/28928	0.162791	4.72338	4.61627	0.00061612	0.00349645	0.00205575	Cxcl5/Cxcl1/Stx11/Bcr/Trem1/Ptafr/Anxa3	7
BP	GO:0070884	regulation of calcineurin-NFAT signaling cascade	7/997	43/28928	0.162791	4.72338	4.61627	0.00061612	0.00349645	0.00205575	Nrg1/Fhl2/Rcan1/Ppp3cc/Lmcd1/Clec7a/Chp2	7
BP	GO:0045064	T-helper 2 cell differentiation	5/997	21/28928	0.238095	6.90834	5.11717	0.00061801	0.00349993	0.00205779	Il4ra/Il6/Anxa1/Myb/Bcl3	5
BP	GO:0070431	nucleotide-binding oligomerization domain containing 2 signaling pathway	5/997	21/28928	0.238095	6.90834	5.11717	0.00061801	0.00349993	0.00205779	Nfkbia/Hspa1b/Tnfaip3/Slc15a3/Inava	5
BP	GO:1901990	regulation of mitotic cell cycle phase transition	25/997	354/28928	0.0706215	2.04909	3.75217	0.000623539	0.0035276	0.00207406	Adamts1/Ier3/Fam107a/Cenpj/Bcl7a/Anxa1/Plk3/Zwint/Rgcc/Rb1/Ccne2/Pdpn/Klf11/Prmt2/Dusp1/Rad51c/Cdc20/Ctdsp1/Donson/Nek6/Lsm10/Hspa2/Sde2/Sin3a/Prkdc	25
BP	GO:0061756	leukocyte adhesion to vascular endothelial cell	8/997	56/28928	0.142857	4.14501	4.45075	0.000634133	0.00358383	0.00210712	Selp/Il6/Icam1/Sele/Cx3cr1/Ptafr/Gcnt1/Traf6	8
BP	GO:0007517	muscle organ development	27/997	395/28928	0.0683544	1.98331	3.71766	0.000636731	0.00359481	0.00211358	Nrg1/Maff/Il6/Rcan1/Egr1/Myc/Fzd2/Nr4a1/Id3/Rb1/Tgfbr3/Asb2/Egr2/Eng/Lmna/Flnb/Cryab/Gja1/Nr2f2/Ube4b/S1pr1/Meox2/Adrb2/Lif/Lox/Gata4/Bcl9	27
BP	GO:0090276	regulation of peptide hormone secretion	21/997	276/28928	0.076087	2.20767	3.80873	0.000640524	0.0036125	0.00212398	Il6/Stxbp4/Ildr1/Klf7/Hif1a/Ccn3/Glul/Inhbb/Lrrc8a/Rfx3/Pim3/Il1b/Nos2/Gja1/Cpt1a/Acvr1c/Acsl4/Oga/Irs2/Lif/Midn	21
BP	GO:0060038	cardiac muscle cell proliferation	9/997	70/28928	0.128571	3.73051	4.32131	0.00065329	0.00368072	0.00216409	Nrg1/Fgfr1/Fgf2/Tgfbr3/Gja1/Tgfbr2/Yap1/Pim1/Gata4	9
BP	GO:0032409	regulation of transporter activity	18/997	220/28928	0.0818182	2.37396	3.86491	0.000658776	0.00370781	0.00218002	Ccl2/Gem/Kcne4/Arc/Kcne3/Gpr35/Pln/Slc5a3/Fgf11/Agrn/Edn1/Gja1/Pim1/Hspa2/Adrb2/Osr1/Gal/Scn3b	18
BP	GO:0006140	regulation of nucleotide metabolic process	11/997	100/28928	0.11	3.19165	4.14783	0.000666907	0.00374205	0.00220015	Ier3/Myc/Hif1a/Ddit4/Ogt/Entpd1/Slc4a4/Ppara/Tspo/Cbfa2t3/Cda	11
BP	GO:0033209	tumor necrosis factor-mediated signaling pathway	11/997	100/28928	0.11	3.19165	4.14783	0.000666907	0.00374205	0.00220015	Sphk1/Nfkbia/Tnfrsf1b/Hspa1b/Tnfrsf11b/Krt18/Naip6/Plvap/Tjp2/Mmp8/Traf6	11
BP	GO:0050810	regulation of steroid biosynthetic process	11/997	100/28928	0.11	3.19165	4.14783	0.000666907	0.00374205	0.00220015	Dab2/Egr1/Gpr146/Il1a/H6pd/Por/Tspo/Fgfr4/Sec14l2/Insig2/Fgf15	11
BP	GO:0062013	positive regulation of small molecule metabolic process	17/997	202/28928	0.0841584	2.44186	3.88524	0.000669982	0.00375163	0.00220578	Rdh10/Dab2/Myc/Hif1a/Anxa1/Ptgs2/Avpr1a/Il1b/Ptafr/Slc4a4/Cpt1a/Pmaip1/Por/Ppara/Sec14l2/Irs2/Dgat2	17
BP	GO:1901292	nucleoside phosphate catabolic process	17/997	202/28928	0.0841584	2.44186	3.88524	0.000669982	0.00375163	0.00220578	Ada/Ier3/Myc/Hif1a/Pfkfb3/Ddit4/Art2b/Dpyd/Art2a/Ogt/Entpd1/Slc4a4/Ppara/Nudt12/Nt5e/Cbfa2t3/Cda	17
BP	GO:0048640	negative regulation of developmental growth	12/997	116/28928	0.103448	3.00156	4.081	0.00067547	0.0037785	0.00222158	Ptch1/Epha7/Rgs4/Gja1/Ccr5/Sema6d/Tgfbr2/Ppara/Stc2/Bcl11a/Adrb2/Ifrd1	12
BP	GO:0035023	regulation of Rho protein signal transduction	10/997	85/28928	0.117647	3.41353	4.21016	0.000682165	0.00380818	0.00223903	Abl2/Gpr4/Prag1/Bcr/F2r/Stard13/Adgrg1/Dock8/Eps8l3/Kctd10	10
BP	GO:0071277	cellular response to calcium ion	10/997	85/28928	0.117647	3.41353	4.21016	0.000682165	0.00380818	0.00223903	Fosb/Clic4/Junb/Inhbb/Cpne8/Itpkb/Itpkc/Edn1/Jund/Chp2	10
BP	GO:0030900	forebrain development	31/997	480/28928	0.0645833	1.87389	3.6476	0.000684057	0.00381485	0.00224295	Nr4a3/Pgap1/Nrg1/Sema7a/Fgfr1/Hif1a/Tubb2a/Bcl11b/Inhbb/Fgf2/Sema6b/Tbx3/Slc2a1/Aldh1a3/Axl/Id4/Tubb2b/Atat1/Nr4a2/Rapgef2/Avpr1a/Adgrg1/Ndst1/Bbs4/Nr2f2/Anxa3/Ndel1/Slc7a11/Mfsd2a/Lrp8/Sin3a	31
BP	GO:0048266	behavioral response to pain	6/997	32/28928	0.1875	5.44032	4.74817	0.000693827	0.00386148	0.00227037	Thbs1/Runx1/Tacr1/Capn2/Tspo/Osm	6
BP	GO:1900543	negative regulation of purine nucleotide metabolic process	6/997	32/28928	0.1875	5.44032	4.74817	0.000693827	0.00386148	0.00227037	Ier3/Ddit4/Entpd1/Ppara/Tspo/Cbfa2t3	6
BP	GO:0048534	hematopoietic or lymphoid organ development	13/997	133/28928	0.0977444	2.83606	4.00968	0.000706233	0.00392654	0.00230862	Ada/Bcl2l11/Ripk3/Bcl11b/Pdpn/Myb/Samd9l/Rorc/Il15/Slc40a1/Nfkb2/Prkdc/Bcl3	13
BP	GO:0010464	regulation of mesenchymal cell proliferation	7/997	44/28928	0.159091	4.61603	4.53509	0.00071114	0.00394183	0.00231761	Myc/Fgfr1/Foxf1/Lmna/Tgfbr2/Irs2/Sox9	7
BP	GO:0032733	positive regulation of interleukin-10 production	7/997	44/28928	0.159091	4.61603	4.53509	0.00071114	0.00394183	0.00231761	Il6/Il20rb/Irf4/Inava/Clec7a/Fcer1g/Bcl3	7
BP	GO:0106056	regulation of calcineurin-mediated signaling	7/997	44/28928	0.159091	4.61603	4.53509	0.00071114	0.00394183	0.00231761	Nrg1/Fhl2/Rcan1/Ppp3cc/Lmcd1/Clec7a/Chp2	7
BP	GO:0097720	calcineurin-mediated signaling	8/997	57/28928	0.140351	4.07229	4.38656	0.000715685	0.00396301	0.00233007	Nrg1/Fhl2/Rcan1/Nr5a2/Ppp3cc/Lmcd1/Clec7a/Chp2	8
BP	GO:0120162	positive regulation of cold-induced thermogenesis	11/997	101/28928	0.108911	3.16005	4.10848	0.000725534	0.00400174	0.00235283	Il4ra/Gadd45g/Lcn2/Irf4/Ogt/Cebpb/Prlr/Gja1/Prkab2/Pdgfc/Adrb2	11
BP	GO:0001836	release of cytochrome c from mitochondria	9/997	71/28928	0.126761	3.67796	4.26839	0.000725598	0.00400174	0.00235283	Bcl2l11/Tnfsf10/Plaur/Lmna/Pmaip1/Sfn/Bcl2a1a/Bcl2a1d/Bcl2a1b	9
BP	GO:0070231	T cell apoptotic process	9/997	71/28928	0.126761	3.67796	4.26839	0.000725598	0.00400174	0.00235283	Ada/Bcl2l11/Ripk3/Adam8/Hif1a/Bcl11b/Dock8/Rorc/Bcl3	9
BP	GO:1900046	regulation of hemostasis	9/997	71/28928	0.126761	3.67796	4.26839	0.000725598	0.00400174	0.00235283	Thbs1/Plat/S100a9/Plaur/Thbd/F2r/Tph1/Serpine1/Plau	9
BP	GO:0019058	viral life cycle	21/997	279/28928	0.0752688	2.18393	3.7543	0.000736172	0.00405598	0.00238472	Ch25h/Ifi207/Icam1/Trim30d/Trim8/Slc7a1/Ifitm1/Axl/Nr5a2/Trim12c/Zfyve1/Vps37b/Plscr1/Tasor/Ifitm6/Ifi213/Trim34b/Mavs/Trim6/Zc3h12a/Oasl2	21
BP	GO:0045471	response to ethanol	15/997	168/28928	0.0892857	2.59063	3.90648	0.000741793	0.00408284	0.00240052	Fosb/Ccl2/Csf3/Cd14/Arc/Fgf2/Ccl7/Tacr1/Cpt1a/Itpr2/Ppara/Slc23a2/Tnc/St6gal1/Fgf15	15
BP	GO:1903510	mucopolysaccharide metabolic process	10/997	86/28928	0.116279	3.37384	4.16528	0.000748488	0.00411556	0.00241975	Tnfaip6/Cd44/Fgf2/Cemip2/Il1b/Lyve1/Ndst1/Il15/Has1/Ednrb	10
BP	GO:0042471	ear morphogenesis	14/997	151/28928	0.0927152	2.69014	3.93408	0.00075967	0.00417286	0.00245344	Nr4a3/Spry2/Myc/Fzd2/Fgfr1/Tbx3/Aldh1a3/Bcr/Slitrk6/Edn1/Insig2/Sox9/Osr1/Osr2	14
BP	GO:0016032	viral process	25/997	359/28928	0.0696379	2.02055	3.67611	0.000762538	0.00418442	0.00246024	Ch25h/Ccl3/Ifi207/Icam1/Trim30d/Trim8/Slc7a1/Ifitm1/Axl/Nr5a2/Hexim1/Trim12c/Zfyve1/Vps37b/Plscr1/Tasor/Ifitm6/Ifi213/Ppara/Trim34b/Mavs/Trim6/Sp100/Zc3h12a/Oasl2	25
BP	GO:0045649	regulation of macrophage differentiation	5/997	22/28928	0.227273	6.59433	4.95931	0.00077723	0.00424803	0.00249764	Trib1/Csf1/Rb1/Il34/Lif	5
BP	GO:0060749	mammary gland alveolus development	5/997	22/28928	0.227273	6.59433	4.95931	0.00077723	0.00424803	0.00249764	Areg/Hif1a/Foxf1/Prlr/Tph1	5
BP	GO:0061377	mammary gland lobule development	5/997	22/28928	0.227273	6.59433	4.95931	0.00077723	0.00424803	0.00249764	Areg/Hif1a/Foxf1/Prlr/Tph1	5
BP	GO:2000114	regulation of establishment of cell polarity	5/997	22/28928	0.227273	6.59433	4.95931	0.00077723	0.00424803	0.00249764	Abl2/Plekhg3/Cdh5/Dock8/Kif20b	5
BP	GO:0043301	negative regulation of leukocyte degranulation	4/997	13/28928	0.307692	8.92771	5.40149	0.000781534	0.00425881	0.00250398	Hmox1/Foxf1/Rabgef1/Bcr	4
BP	GO:0044341	sodium-dependent phosphate transport	4/997	13/28928	0.307692	8.92771	5.40149	0.000781534	0.00425881	0.00250398	Cebpb/Stc2/Cry2/Slc34a2	4
BP	GO:0097501	stress response to metal ion	4/997	13/28928	0.307692	8.92771	5.40149	0.000781534	0.00425881	0.00250398	Mt2/Mt1/Slc11a1/Slc30a10	4
BP	GO:0007265	Ras protein signal transduction	12/997	118/28928	0.101695	2.95068	4.01155	0.000787135	0.00428077	0.00251689	Nrg1/Spry2/Csf1/Spry4/Spry3/Itpkb/Rb1/Rabgef1/Plk2/Rapgef2/Spry1/Rasgrp1	12
BP	GO:0042100	B cell proliferation	11/997	102/28928	0.107843	3.12907	4.06963	0.000788378	0.00428077	0.00251689	Ctla4/Ada/Il10/Ctps1/Shb/Prlr/Fcgr2b/Irs2/Rasgrp1/Tirap/Cd180	11
BP	GO:1901992	positive regulation of mitotic cell cycle phase transition	11/997	102/28928	0.107843	3.12907	4.06963	0.000788378	0.00428077	0.00251689	Adamts1/Cenpj/Anxa1/Rgcc/Rb1/Ccne2/Rad51c/Cdc20/Lsm10/Hspa2/Sin3a	11
BP	GO:0030216	keratinocyte differentiation	15/997	169/28928	0.0887574	2.5753	3.88039	0.000788686	0.00428077	0.00251689	Errfi1/Clic4/Bcl11b/Epha2/Ppl/Ptgs1/Anxa1/Ptgs2/Bcr/Il1a/Sprr2h/Flnb/Sfn/Yap1/Stfa2l1	15
BP	GO:0001889	liver development	16/997	187/28928	0.0855615	2.48257	3.84274	0.000797569	0.0043247	0.00254272	Hmox1/Errfi1/Il6/Ada/Ptch1/Il10/Runx1/Tbx3/Tgfbr3/Cebpb/Tnfaip3/Cpt1a/Plau/Slc7a5/Hp/Sox9	16
BP	GO:0050688	regulation of defense response to virus	9/997	72/28928	0.125	3.62688	4.21643	0.000804298	0.00435462	0.00256031	Il1b/Il15/Sting1/Dtx3l/Mavs/Trim6/Zc3h12a/Mmp12/Sin3a	9
BP	GO:0010463	mesenchymal cell proliferation	8/997	58/28928	0.137931	4.00208	4.32383	0.00080547	0.00435462	0.00256031	Myc/Fgfr1/Foxf1/Lmna/Tgfbr2/Irs2/Sox9/Osr1	8
BP	GO:0045933	positive regulation of muscle contraction	8/997	58/28928	0.137931	4.00208	4.32383	0.00080547	0.00435462	0.00256031	Sphk1/Ada/Ptgs1/Ptgs2/F2r/Tacr1/Ptafr/Edn1	8
BP	GO:0034763	negative regulation of transmembrane transport	13/997	135/28928	0.0962963	2.79404	3.94741	0.000812787	0.00438985	0.00258103	Thbs1/Gem/Kcne4/Myc/Kcne3/Gpr35/Pln/Ppp3cc/Il1b/Rgs4/Agrn/Irs2/Osr1	13
BP	GO:0032660	regulation of interleukin-17 production	7/997	45/28928	0.155556	4.51345	4.45631	0.000817393	0.00440604	0.00259055	Sphk1/Il6/Ccn1/Arid5a/Il15/Slc7a5/Osm	7
BP	GO:0046320	regulation of fatty acid oxidation	7/997	45/28928	0.155556	4.51345	4.45631	0.000817393	0.00440604	0.00259055	Pdk4/Cpt1a/Ppara/Irs2/Mfsd2a/Sox9/Dgat2	7
BP	GO:1903578	regulation of ATP metabolic process	10/997	87/28928	0.114943	3.33506	4.12106	0.000820028	0.00441591	0.00259635	Ier3/Myc/Hif1a/Ddit4/Ogt/Entpd1/Slc4a4/Ppara/Tspo/Cbfa2t3	10
BP	GO:0002230	positive regulation of defense response to virus by host	6/997	33/28928	0.181818	5.27546	4.64285	0.000823524	0.00441738	0.00259721	Sting1/Dtx3l/Mavs/Trim6/Zc3h12a/Sin3a	6
BP	GO:0003416	endochondral bone growth	6/997	33/28928	0.181818	5.27546	4.64285	0.000823524	0.00441738	0.00259721	Thbs1/Stc1/Tgfbr2/Por/Sox9/Ecm1	6
BP	GO:0032647	regulation of interferon-alpha production	6/997	33/28928	0.181818	5.27546	4.64285	0.000823524	0.00441738	0.00259721	Havcr2/Tlr3/Tlr8/Mavs/Trim65/Mmp12	6
BP	GO:0032691	negative regulation of interleukin-1 beta production	6/997	33/28928	0.181818	5.27546	4.64285	0.000823524	0.00441738	0.00259721	Lilrb4b/Lilrb4a/Errfi1/Cx3cr1/Tnfaip3/Zc3h12a	6
BP	GO:0050680	negative regulation of epithelial cell proliferation	15/997	170/28928	0.0882353	2.56015	3.8545	0.000838068	0.004491	0.0026405	Thbs1/Dab2/Ptch1/Rgcc/Rb1/Tgfbr3/Eng/Ovol1/Flt1/Klf9/Gja1/Sfn/Ctsl/Nr2f2/Sox9	15
BP	GO:0045833	negative regulation of lipid metabolic process	12/997	119/28928	0.10084	2.92589	3.97737	0.000848502	0.00453804	0.00266815	Ch25h/Sphk1/Sik1/Hcar2/Il1b/Cidec/Insig2/Mfsd2a/Sox9/Slc27a1/Dgat2/Fgf15	12
BP	GO:0090130	tissue migration	12/997	119/28928	0.10084	2.92589	3.97737	0.000848502	0.00453804	0.00266815	Hif1a/Foxf1/Vim/Gab2/Tgfbr3/Tacr1/Ptprr/Tgfbr2/Serpine1/Irs2/Sox9/Tac1	12
BP	GO:0030838	positive regulation of actin filament polymerization	8/997	59/28928	0.135593	3.93424	4.26248	0.00090408	0.00481649	0.00283187	Csf3/Icam1/Baiap2/Ccl11/Cdc42ep3/Cracd/Cdc42ep2/Myo1c	8
BP	GO:0052372	modulation by symbiont of entry into host	8/997	59/28928	0.135593	3.93424	4.26248	0.00090408	0.00481649	0.00283187	Ch25h/Trim30d/Trim8/Ifitm1/Trim12c/Ifitm6/Trim34b/Trim6	8
BP	GO:0071548	response to dexamethasone	8/997	59/28928	0.135593	3.93424	4.26248	0.00090408	0.00481649	0.00283187	Ccl2/Ddit4/Axin2/Gdnf/Pappa/Ptafr/Edn1/Por	8
BP	GO:0098586	cellular response to virus	8/997	59/28928	0.135593	3.93424	4.26248	0.00090408	0.00481649	0.00283187	Il6/Hif1a/Tlr3/Cxcl10/Trim6/Gsdme/Zc3h12a/Mmp12	8
BP	GO:0001823	mesonephros development	12/997	120/28928	0.1	2.9015	3.94355	0.000913809	0.00486359	0.00285956	Ptch1/Cd44/Myc/Fgfr1/Pgf/Fgf2/Sdc4/Gdnf/Spry1/Sox9/Osr1/Osr2	12
BP	GO:0030203	glycosaminoglycan metabolic process	11/997	104/28928	0.105769	3.0689	3.99333	0.000927647	0.00493246	0.00290005	Tnfaip6/Hs3st1/Cd44/Fgf2/Cemip2/Il1b/Lyve1/Ndst1/Il15/Has1/Ednrb	11
BP	GO:0001782	B cell homeostasis	7/997	46/28928	0.152174	4.41533	4.3798	0.000935789	0.00497093	0.00292267	Ada/Bcl2l11/Cd44/Hif1a/Bbs4/Tnfaip3/Bcl2a1a	7
BP	GO:0061008	hepaticobiliary system development	16/997	190/28928	0.0842105	2.44337	3.77123	0.0009455	0.00501765	0.00295014	Hmox1/Errfi1/Il6/Ada/Ptch1/Il10/Runx1/Tbx3/Tgfbr3/Cebpb/Tnfaip3/Cpt1a/Plau/Slc7a5/Hp/Sox9	16
BP	GO:0046486	glycerolipid metabolic process	26/997	385/28928	0.0675325	1.95946	3.58065	0.000947051	0.00502102	0.00295212	Sik1/Pgap1/Mboat1/Lrat/Ip6k2/Itpkb/Itpkc/Plscr1/Pld2/Capn2/Agpat4/Plch1/Cpt1a/Plek/Cidec/Acsl4/Prdx6/Insig2/Dgkb/Pgs1/Mfsd2a/Pla2g7/Abhd2/Slc27a1/Napepld/Dgat2	26
BP	GO:0016485	protein processing	21/997	285/28928	0.0736842	2.13795	3.64748	0.00096501	0.00507771	0.00298545	Thbs1/Plat/Ifi207/Il1r2/Ptch1/Plaur/Myc/Ctla2a/F3/Ece1/Cpn1/Adamts3/Capn2/Ogt/Bag2/Ctsl/Ifi213/Serpine1/Plau/Sde2/Cplane2	21
BP	GO:0048588	developmental cell growth	21/997	285/28928	0.0736842	2.13795	3.64748	0.00096501	0.00507771	0.00298545	Tnfrsf12a/Sema7a/Epha7/Mex3c/Map3k13/Prmt2/Rgs4/Edn1/Ccr5/Sema6d/Tgfbr2/Vcl/Ppara/Slc23a2/Ndel1/Meis1/Bcl11a/Sox9/Gata4/Sin3a/Ifrd1	21
BP	GO:0002283	neutrophil activation involved in immune response	5/997	23/28928	0.217391	6.30762	4.81098	0.000965153	0.00507771	0.00298545	Stx11/Bcr/Ptafr/Anxa3/Fcer1g	5
BP	GO:0007620	copulation	5/997	23/28928	0.217391	6.30762	4.81098	0.000965153	0.00507771	0.00298545	Ada/Tacr1/Avpr1a/Ednrb/Vip	5
BP	GO:0032354	response to follicle-stimulating hormone	5/997	23/28928	0.217391	6.30762	4.81098	0.000965153	0.00507771	0.00298545	Tgfbr3/Gclc/Pappa/Edn1/Gata4	5
BP	GO:0035633	maintenance of blood-brain barrier	5/997	23/28928	0.217391	6.30762	4.81098	0.000965153	0.00507771	0.00298545	Ptgs1/Ptgs2/Tjp2/Bdkrb2/Mfsd2a	5
BP	GO:0038128	ERBB2 signaling pathway	5/997	23/28928	0.217391	6.30762	4.81098	0.000965153	0.00507771	0.00298545	Areg/Nrg1/Ereg/Ptprr/Btc	5
BP	GO:0042730	fibrinolysis	5/997	23/28928	0.217391	6.30762	4.81098	0.000965153	0.00507771	0.00298545	Thbs1/Plat/Plaur/Serpine1/Plau	5
BP	GO:0010758	regulation of macrophage chemotaxis	6/997	34/28928	0.176471	5.1203	4.54172	0.000971139	0.00509941	0.00299821	Thbs1/Ccl2/Csf1/Trem1/Il34/C5ar1	6
BP	GO:0046597	negative regulation of viral entry into host cell	6/997	34/28928	0.176471	5.1203	4.54172	0.000971139	0.00509941	0.00299821	Ch25h/Trim30d/Trim8/Ifitm1/Trim12c/Ifitm6	6
BP	GO:0022898	regulation of transmembrane transporter activity	17/997	209/28928	0.0813397	2.36008	3.72827	0.00097976	0.00513609	0.00301978	Ccl2/Gem/Kcne4/Arc/Kcne3/Gpr35/Pln/Fgf11/Agrn/Edn1/Gja1/Pim1/Hspa2/Adrb2/Osr1/Gal/Scn3b	17
BP	GO:0002637	regulation of immunoglobulin production	10/997	89/28928	0.11236	3.26012	4.03452	0.000979997	0.00513609	0.00301978	Lilrb4a/Il4ra/Il6/Il10/Cd86/Aplf/Tnfaip3/Fcgr2b/Prkdc/Traf6	10
BP	GO:0008347	glial cell migration	9/997	74/28928	0.121622	3.52886	4.11522	0.000982546	0.00514328	0.00302401	Ccl2/Ccl3/Epha4/Csf1/Cx3cr1/Vim/Adgrg1/Tspo/Lrp8	9
BP	GO:0019364	pyridine nucleotide catabolic process	12/997	121/28928	0.0991736	2.87753	3.91008	0.000983247	0.00514328	0.00302401	Ier3/Myc/Hif1a/Pfkfb3/Ddit4/Art2b/Art2a/Ogt/Slc4a4/Ppara/Nudt12/Cbfa2t3	12
BP	GO:0045055	regulated exocytosis	20/997	266/28928	0.075188	2.18158	3.6577	0.000985788	0.00515166	0.00302893	Hmox1/Nr4a3/Il4ra/Ccl3/D6Wsu163e/Stx11/Prkcg/Foxf1/Gab2/Rabgef1/Bcr/Pld2/Cd160/Ptafr/Tph1/Plek/Anxa3/Rasgrp1/P2ry4/Fcer1g	20
BP	GO:0019233	sensory perception of pain	11/997	105/28928	0.104762	3.03967	3.95586	0.00100456	0.00524475	0.00308367	Ccl2/Nrg1/Ccl3/Ccn3/Rnf170/Ptges/Gpr171/Calca/F2r/Aloxe3/Tac1	11
BP	GO:0003300	cardiac muscle hypertrophy	12/997	122/28928	0.0983607	2.85394	3.87695	0.00105702	0.00551339	0.00324161	Nr4a3/Errfi1/Tnfrsf1b/Ece1/Lmna/Rgs4/Lmcd1/Edn1/Ppara/Camta2/Meis1/Gata4	12
BP	GO:0018119	peptidyl-cysteine S-nitrosylation	4/997	14/28928	0.285714	8.29001	5.15459	0.00106441	0.00552568	0.00324884	S100a8/S100a9/Ncoa7/Nos2	4
BP	GO:0031652	positive regulation of heat generation	4/997	14/28928	0.285714	8.29001	5.15459	0.00106441	0.00552568	0.00324884	Ptgs2/Il1b/Ccr5/Slc27a1	4
BP	GO:0034145	positive regulation of toll-like receptor 4 signaling pathway	4/997	14/28928	0.285714	8.29001	5.15459	0.00106441	0.00552568	0.00324884	Cd14/Ninj1/Znrf1/Tirap	4
BP	GO:0046886	positive regulation of hormone biosynthetic process	4/997	14/28928	0.285714	8.29001	5.15459	0.00106441	0.00552568	0.00324884	Dab2/Egr1/Hif1a/Por	4
BP	GO:2001279	regulation of unsaturated fatty acid biosynthetic process	4/997	14/28928	0.285714	8.29001	5.15459	0.00106441	0.00552568	0.00324884	Anxa1/Ptgs2/Avpr1a/Il1b	4
BP	GO:0030279	negative regulation of ossification	7/997	47/28928	0.148936	4.32139	4.30545	0.00106728	0.0055353	0.0032545	Ccr1/Hif1a/Calca/Tph1/Adrb2/Sox9/Ecm1	7
BP	GO:0034284	response to monosaccharide	20/997	268/28928	0.0746269	2.1653	3.62096	0.00108004	0.00559551	0.00328989	Thbs1/Ccl2/Stxbp4/Icam1/Egr1/Klf7/Hif1a/Glul/Ptgs2/Il1a/Gclc/Pim3/Ogt/Gja1/Ctsl/Acvr1c/Ppara/Irs2/Sin3a/Hmga1	20
BP	GO:0010761	fibroblast migration	9/997	75/28928	0.12	3.48181	4.06592	0.00108297	0.00559551	0.00328989	Thbs1/Akap12/Fgfr1/Schip1/Ccn3/Fgf2/Sdc4/Has1/Zfand5	9
BP	GO:0050818	regulation of coagulation	9/997	75/28928	0.12	3.48181	4.06592	0.00108297	0.00559551	0.00328989	Thbs1/Plat/Procr/S100a9/Plaur/Thbd/F2r/Serpine1/Plau	9
BP	GO:0071385	cellular response to glucocorticoid stimulus	9/997	75/28928	0.12	3.48181	4.06592	0.00108297	0.00559551	0.00328989	Ccl2/Stc1/Fam107a/Ddit4/Axin2/Anxa1/Gdnf/Klf9/Edn1	9
BP	GO:0032890	regulation of organic acid transport	11/997	106/28928	0.103774	3.011	3.91884	0.00108666	0.005604	0.00329489	Thbs1/Il1rn/Ptges/Il1a/Avpr1a/Il1b/Rgs4/Edn1/Acsl4/Irs2/Slc7a5	11
BP	GO:0061515	myeloid cell development	11/997	106/28928	0.103774	3.011	3.91884	0.00108666	0.005604	0.00329489	Ninj1/Hba-a2/Hba-a1/Myb/Adgrf5/Sox6/Cebpb/Alas2/Tjp2/Nemp1/Meis1	11
BP	GO:1990845	adaptive thermogenesis	15/997	175/28928	0.0857143	2.487	3.72774	0.00112609	0.0058019	0.00341125	Il4ra/Gadd45g/Lcn2/Rb1/Irf4/Ogt/Cebpb/Il15/Prlr/Gja1/Prkab2/Pdgfc/Arrdc3/Adrb2/Id1	15
BP	GO:1901989	positive regulation of cell cycle phase transition	12/997	123/28928	0.097561	2.83074	3.84415	0.00113533	0.005844	0.003436	Adamts1/Stxbp4/Cenpj/Anxa1/Rgcc/Rb1/Ccne2/Rad51c/Cdc20/Lsm10/Hspa2/Sin3a	12
BP	GO:0002053	positive regulation of mesenchymal cell proliferation	6/997	35/28928	0.171429	4.97401	4.4445	0.00113827	0.00584816	0.00343844	Myc/Fgfr1/Foxf1/Tgfbr2/Irs2/Sox9	6
BP	GO:0002902	regulation of B cell apoptotic process	6/997	35/28928	0.171429	4.97401	4.4445	0.00113827	0.00584816	0.00343844	Ada/Cd44/Myc/Il10/Bcl2a1a/Irs2	6
BP	GO:0018105	peptidyl-serine phosphorylation	17/997	212/28928	0.0801887	2.32668	3.66292	0.00114581	0.00588137	0.00345797	Il6/Spry2/Cd44/Ip6k2/Ntf3/Ptgs2/Plk2/Map3k13/Ogt/Crebl2/Bdkrb2/Nek6/Gadd45a/Trim6/Lif/Osm/Prkdc	17
BP	GO:0051924	regulation of calcium ion transport	21/997	289/28928	0.0726644	2.10836	3.57772	0.0011495	0.00589481	0.00346587	Gem/Ccl3/Ccr1/Stc1/Icam1/Trpv3/Bdkrb1/Gpr35/Ptgs2/Pln/F2r/Ppp3cc/Rgs4/Gja1/Serpine1/Tspo/Stc2/Cxcl10/Oga/Hspa2/Adrb2	21
BP	GO:0010001	glial cell differentiation	22/997	309/28928	0.0711974	2.0658	3.55862	0.00115682	0.00592128	0.00348144	S100a8/Nrg1/Abl2/S100a9/Tnfrsf1b/Epha4/Pfkfb3/Fgf2/Abcc1/Ntf3/Vim/Id4/Gfap/Egr2/Sox6/Il1b/Il34/Ndrg1/Tppp/C5ar1/Lif/Sox9	22
BP	GO:1901888	regulation of cell junction assembly	22/997	309/28928	0.0711974	2.0658	3.55862	0.00115682	0.00592128	0.00348144	Nrg1/Lrfn4/Fam107a/Fgfr1/Epha7/Epha2/Sdc4/Ptpn1/Sema4a/Rapgef2/Ptprd/Il1b/Ogt/Sema4c/Slitrk6/Agrn/Gja1/Vcl/Flrt2/Abi3bp/Fermt2/Myo1c	22
BP	GO:0042445	hormone metabolic process	20/997	270/28928	0.0740741	2.14926	3.58455	0.00118191	0.00604406	0.00355362	Rdh10/Akr1b8/Dab2/Egr1/Lrat/Hif1a/Schip1/Aldh1a3/Tiparp/Adm/Ece1/Hsd17b2/H6pd/Ctsl/Por/Stc2/Ednrb/Gal/Dgat2/Ces2a	20
BP	GO:0042026	protein refolding	5/997	24/28928	0.208333	6.0448	4.67118	0.00118483	0.00604772	0.00355577	Hspb1/Hspa1b/Hspa1a/Cryab/Hspa2	5
BP	GO:1900746	regulation of vascular endothelial growth factor signaling pathway	5/997	24/28928	0.208333	6.0448	4.67118	0.00118483	0.00604772	0.00355577	Spry2/Sema6a/Adamts3/Adgrg1/Ptp4a3	5
BP	GO:0001655	urogenital system development	9/997	76/28928	0.118421	3.43599	4.01745	0.00119153	0.00607061	0.00356924	Ptch1/Cd44/Plaur/Id4/Prlr/Tnc/Sox9/Osr1/Osr2	9
BP	GO:0048645	animal organ formation	9/997	76/28928	0.118421	3.43599	4.01745	0.00119153	0.00607061	0.00356924	Rdh10/Fgfr1/Fgf2/Axin2/Gdnf/Spry1/Tgfbr2/Fgfr4/Pim1	9
BP	GO:0007613	memory	15/997	176/28928	0.0852273	2.47287	3.70291	0.00119271	0.00607098	0.00356945	Itga5/Nrg1/Lcn2/Rcan1/Egr1/Arc/Il1rn/Ptgs1/Cx3cr1/Ptgs2/Rin1/Plk2/Tacr1/Il1b/Tac1	15
BP	GO:0010043	response to zinc ion	7/997	48/28928	0.145833	4.23136	4.23315	0.00121284	0.0061506	0.00361626	Mt2/Pln/Zfp616/Mt1/Slc30a2/Tspo/Slc30a10	7
BP	GO:0032620	interleukin-17 production	7/997	48/28928	0.145833	4.23136	4.23315	0.00121284	0.0061506	0.00361626	Sphk1/Il6/Ccn1/Arid5a/Il15/Slc7a5/Osm	7
BP	GO:0043507	positive regulation of JUN kinase activity	7/997	48/28928	0.145833	4.23136	4.23315	0.00121284	0.0061506	0.00361626	Epha4/Map3k13/Ptpn1/Edn1/Fgd4/Tirap/Traf6	7
BP	GO:0070269	pyroptotic inflammatory response	7/997	48/28928	0.145833	4.23136	4.23315	0.00121284	0.0061506	0.00361626	Nlrp1b/Nlrp9b/Ninj1/Naip6/Gbp2b/Gbp2/Gsdme	7
BP	GO:0043271	negative regulation of monoatomic ion transport	13/997	141/28928	0.0921986	2.67515	3.76721	0.00121659	0.00616393	0.0036241	Gem/Kcne4/Stc1/Icam1/Kcne3/Gpr35/Ptgs2/Pln/Ppp3cc/Rgs4/Agrn/Osr1/Vip	13
BP	GO:0008637	apoptotic mitochondrial changes	12/997	124/28928	0.0967742	2.80791	3.81168	0.00121839	0.0061673	0.00362608	Ppm1k/Bcl2l11/Tnfsf10/Ier3/Plaur/Gclc/Lmna/Pmaip1/Sfn/Bcl2a1a/Bcl2a1d/Bcl2a1b	12
BP	GO:1904951	positive regulation of establishment of protein localization	25/997	372/28928	0.0672043	1.94994	3.48396	0.00125675	0.00635013	0.00373358	Ccl2/Il6/Hcar2/Cenpj/Hif1a/Glul/Plk3/Ptgs2/Lrrc8a/Il1a/Gja1/Pmaip1/Sfn/A1cf/Acsl4/Bag3/Oga/Irs2/Mavs/Chp2/Pdzk1/Zc3h12a/Ptp4a3/Kif20b/Myo1c	25
BP	GO:0043124	negative regulation of canonical NF-kappaB signal transduction	8/997	62/28928	0.129032	3.74388	4.08623	0.00125914	0.00635013	0.00373358	Lilrb4b/Lilrb4a/Nfkbia/Tgfbr3/Per1/Tnfaip3/Tnip2/Zc3h12a	8
BP	GO:0060443	mammary gland morphogenesis	8/997	62/28928	0.129032	3.74388	4.08623	0.00125914	0.00635013	0.00373358	Areg/Ccl2/Ptch1/Csf1/Epha2/Tbx3/Ccl11/Tgfbr2	8
BP	GO:0061005	cell differentiation involved in kidney development	8/997	62/28928	0.129032	3.74388	4.08623	0.00125914	0.00635013	0.00373358	Gpr4/Ptch1/Gdnf/Edn1/Yap1/Ednrb/Lif/Osr1	8
BP	GO:0042246	tissue regeneration	10/997	92/28928	0.108696	3.15381	3.90922	0.0012671	0.00636875	0.00374453	Ccn3/Ninj1/Anxa1/Gja1/Yap1/Serpine1/Plau/Gata4/Bcl9/Ifrd1	10
BP	GO:0060337	type I interferon-mediated signaling pathway	10/997	92/28928	0.108696	3.15381	3.90922	0.0012671	0.00636875	0.00374453	Ifitm1/Sting1/Ifitm6/Stat2/Mavs/Trim6/Trim65/Mmp12/Sin3a/Oasl2	10
BP	GO:0071357	cellular response to type I interferon	10/997	92/28928	0.108696	3.15381	3.90922	0.0012671	0.00636875	0.00374453	Ifitm1/Sting1/Ifitm6/Stat2/Mavs/Trim6/Trim65/Mmp12/Sin3a/Oasl2	10
BP	GO:0019751	polyol metabolic process	11/997	108/28928	0.101852	2.95524	3.8461	0.00126748	0.00636875	0.00374453	Sphk1/Akr1b8/Ip6k2/Itpkb/Cyp2r1/Itpkc/Slc5a3/Ptafr/Acer2/Plek/Dgat2	11
BP	GO:0051928	positive regulation of calcium ion transport	13/997	142/28928	0.0915493	2.65631	3.7381	0.00129789	0.0065156	0.00383087	Ccl3/Ccr1/Stc1/Trpv3/Bdkrb1/F2r/Ppp3cc/Serpine1/Tspo/Cxcl10/Oga/Hspa2/Adrb2	13
BP	GO:0032355	response to estradiol	12/997	125/28928	0.096	2.78544	3.77954	0.00130641	0.00654596	0.00384871	Areg/Ccl2/Errfi1/Cxcl2/Ptch1/Il10/Ramp3/Ptgs2/Tacr1/Cryab/Gja1/Nr2f2	12
BP	GO:0072526	pyridine-containing compound catabolic process	12/997	125/28928	0.096	2.78544	3.77954	0.00130641	0.00654596	0.00384871	Ier3/Myc/Hif1a/Pfkfb3/Ddit4/Art2b/Art2a/Ogt/Slc4a4/Ppara/Nudt12/Cbfa2t3	12
BP	GO:0045428	regulation of nitric oxide biosynthetic process	9/997	77/28928	0.116883	3.39137	3.96979	0.00130871	0.00654596	0.00384871	Il6/Icam1/Il10/Cx3cr1/Ptgs2/Il1b/Tspo/Clec7a/Zc3h12a	9
BP	GO:0070301	cellular response to hydrogen peroxide	9/997	77/28928	0.116883	3.39137	3.96979	0.00130871	0.00654596	0.00384871	Sphk1/Il6/Lcn2/Ripk3/Anxa1/Axl/Il18rap/Edn1/Tnfaip3	9
BP	GO:0061136	regulation of proteasomal protein catabolic process	16/997	196/28928	0.0816327	2.36858	3.6322	0.00131201	0.00655645	0.00385488	Trib1/Dab2/Csnk1e/Hspa1b/Hspa1a/Prkcg/Axin2/Plk3/Rhbdf1/Plk2/Gclc/Ogt/Cdc20/Bag2/Cbfa2t3/Herpud1	16
BP	GO:0002313	mature B cell differentiation involved in immune response	6/997	36/28928	0.166667	4.83584	4.3509	0.00132657	0.00659913	0.00387997	Lilrb4a/Il6/Ada/Il10/Tnfaip3/Bcl3	6
BP	GO:0003176	aortic valve development	6/997	36/28928	0.166667	4.83584	4.3509	0.00132657	0.00659913	0.00387997	Tnfrsf1b/Axin2/Rb1/Tgfbr2/Sox9/Gata4	6
BP	GO:0032607	interferon-alpha production	6/997	36/28928	0.166667	4.83584	4.3509	0.00132657	0.00659913	0.00387997	Havcr2/Tlr3/Tlr8/Mavs/Trim65/Mmp12	6
BP	GO:0050869	negative regulation of B cell activation	6/997	36/28928	0.166667	4.83584	4.3509	0.00132657	0.00659913	0.00387997	Lilrb4a/Ctla4/Il10/Tnfaip3/Fcgr2b/Bank1	6
BP	GO:0060008	Sertoli cell differentiation	6/997	36/28928	0.166667	4.83584	4.3509	0.00132657	0.00659913	0.00387997	Icam1/Il1a/Gja1/Ctsl/Sox9/Gata4	6
BP	GO:0009261	ribonucleotide catabolic process	14/997	160/28928	0.0875	2.53882	3.68764	0.00133401	0.00663014	0.00389821	Ada/Ier3/Myc/Hif1a/Pfkfb3/Ddit4/Dpyd/Ogt/Entpd1/Slc4a4/Ppara/Nt5e/Cbfa2t3/Cda	14
BP	GO:0000041	transition metal ion transport	11/997	109/28928	0.100917	2.92812	3.81035	0.00136675	0.00678056	0.00398665	Lcn2/Slc25a28/Hif1a/Rep15/Slc46a3/Steap4/Slc30a2/Slc40a1/Slc11a1/Slc30a10/Flvcr2	11
BP	GO:0050848	regulation of calcium-mediated signaling	11/997	109/28928	0.100917	2.92812	3.81035	0.00136675	0.00678056	0.00398665	Nrg1/Ccl3/Ada/Fhl2/Rcan1/Ramp3/Ppp3cc/Lmcd1/Edn1/Clec7a/Chp2	11
BP	GO:0051180	vitamin transport	7/997	49/28928	0.142857	4.14501	4.16279	0.0013735	0.00680173	0.0039991	Abcc1/Slc2a1/Abcg2/Slc23a2/Npc1l1/Slc27a1/Slc2a3	7
BP	GO:1904645	response to amyloid-beta	7/997	49/28928	0.142857	4.14501	4.16279	0.0013735	0.00680173	0.0039991	Icam1/Epha4/Abcc1/Ramp3/Gja1/Fcgr2b/Adrb2	7
BP	GO:0006110	regulation of glycolytic process	8/997	63/28928	0.126984	3.68445	4.02991	0.00139944	0.00689999	0.00405687	Ier3/Myc/Hif1a/Ddit4/Ogt/Slc4a4/Ppara/Cbfa2t3	8
BP	GO:0010812	negative regulation of cell-substrate adhesion	8/997	63/28928	0.126984	3.68445	4.02991	0.00139944	0.00689999	0.00405687	Thbs1/Gcnt2/Fam107a/Spry4/Ptpn1/Acer2/Serpine1/Mmp12	8
BP	GO:0030811	regulation of nucleotide catabolic process	8/997	63/28928	0.126984	3.68445	4.02991	0.00139944	0.00689999	0.00405687	Ier3/Myc/Hif1a/Ddit4/Ogt/Slc4a4/Ppara/Cbfa2t3	8
BP	GO:0033121	regulation of purine nucleotide catabolic process	8/997	63/28928	0.126984	3.68445	4.02991	0.00139944	0.00689999	0.00405687	Ier3/Myc/Hif1a/Ddit4/Ogt/Slc4a4/Ppara/Cbfa2t3	8
BP	GO:0014897	striated muscle hypertrophy	12/997	126/28928	0.0952381	2.76334	3.74771	0.00139963	0.00689999	0.00405687	Nr4a3/Errfi1/Tnfrsf1b/Ece1/Lmna/Rgs4/Lmcd1/Edn1/Ppara/Camta2/Meis1/Gata4	12
BP	GO:0001764	neuron migration	17/997	216/28928	0.0787037	2.28359	3.57749	0.00140385	0.00691455	0.00406543	Nrg1/Sema6a/Il1r1/Ddit4/Sdccag8/Lrp12/Axl/Tubb2b/Nr4a2/Rapgef2/Adgrg1/Bbs4/Gja1/Nr2f2/Flrt2/Ndel1/Kif20b	17
BP	GO:0002069	columnar/cuboidal epithelial cell maturation	4/997	15/28928	0.266667	7.73735	4.9311	0.00141208	0.00692399	0.00407098	Hif1a/Rfx3/Bhlha15/Gja1	4
BP	GO:0017014	protein nitrosylation	4/997	15/28928	0.266667	7.73735	4.9311	0.00141208	0.00692399	0.00407098	S100a8/S100a9/Ncoa7/Nos2	4
BP	GO:0032308	positive regulation of prostaglandin secretion	4/997	15/28928	0.266667	7.73735	4.9311	0.00141208	0.00692399	0.00407098	Ptges/Il1a/Il1b/Edn1	4
BP	GO:0048755	branching morphogenesis of a nerve	4/997	15/28928	0.266667	7.73735	4.9311	0.00141208	0.00692399	0.00407098	Epha7/Map3k13/Il1b/Bcl11a	4
BP	GO:1903238	positive regulation of leukocyte tethering or rolling	4/997	15/28928	0.266667	7.73735	4.9311	0.00141208	0.00692399	0.00407098	Selp/Sele/Ptafr/Gcnt1	4
BP	GO:0051057	positive regulation of small GTPase mediated signal transduction	9/997	78/28928	0.115385	3.34789	3.92291	0.001435	0.00699538	0.00411295	Nrg1/Gpr4/Csf1/Prag1/Itpkb/F2r/Adgrg1/Agrn/Rasgrp1	9
BP	GO:0003417	growth plate cartilage development	5/997	25/28928	0.2	5.80301	4.53908	0.0014394	0.00699538	0.00411295	Thbs1/Stc1/Tgfbr2/Por/Sox9	5
BP	GO:0032352	positive regulation of hormone metabolic process	5/997	25/28928	0.2	5.80301	4.53908	0.0014394	0.00699538	0.00411295	Rdh10/Dab2/Egr1/Hif1a/Por	5
BP	GO:0032874	positive regulation of stress-activated MAPK cascade	5/997	25/28928	0.2	5.80301	4.53908	0.0014394	0.00699538	0.00411295	Il1a/Il1b/Sema4c/Inava/Clec7a	5
BP	GO:0035872	nucleotide-binding domain, leucine rich repeat containing receptor signaling pathway	5/997	25/28928	0.2	5.80301	4.53908	0.0014394	0.00699538	0.00411295	Nfkbia/Hspa1b/Tnfaip3/Slc15a3/Inava	5
BP	GO:0044321	response to leptin	5/997	25/28928	0.2	5.80301	4.53908	0.0014394	0.00699538	0.00411295	Nr4a3/Inhbb/Prmt2/Edn1/Bbs4	5
BP	GO:0051930	regulation of sensory perception of pain	5/997	25/28928	0.2	5.80301	4.53908	0.0014394	0.00699538	0.00411295	Ccl3/Ccn3/Gpr171/F2r/Tac1	5
BP	GO:0060216	definitive hemopoiesis	5/997	25/28928	0.2	5.80301	4.53908	0.0014394	0.00699538	0.00411295	Runx1/Tgfbr3/Bcr/Lyl1/Meis1	5
BP	GO:0070304	positive regulation of stress-activated protein kinase signaling cascade	5/997	25/28928	0.2	5.80301	4.53908	0.0014394	0.00699538	0.00411295	Il1a/Il1b/Sema4c/Inava/Clec7a	5
BP	GO:1900016	negative regulation of cytokine production involved in inflammatory response	5/997	25/28928	0.2	5.80301	4.53908	0.0014394	0.00699538	0.00411295	Lilrb4b/Lilrb4a/Il1r2/Ppara/Zc3h12a	5
BP	GO:0010631	epithelial cell migration	11/997	110/28928	0.1	2.9015	3.77501	0.00147231	0.00714266	0.00419955	Hif1a/Vim/Gab2/Tgfbr3/Tacr1/Ptprr/Tgfbr2/Serpine1/Irs2/Sox9/Tac1	11
BP	GO:0046849	bone remodeling	11/997	110/28928	0.1	2.9015	3.77501	0.00147231	0.00714266	0.00419955	Il6/Adam8/Tnfrsf11b/Epha2/Pdk4/Tph1/Gja1/S1pr1/Tmem119/Adrb2/Traf6	11
BP	GO:0043302	positive regulation of leukocyte degranulation	6/997	37/28928	0.162162	4.70514	4.2607	0.00153773	0.0074403	0.00437454	Il4ra/Gab2/Pld2/Cd160/Ptafr/Fcer1g	6
BP	GO:0071354	cellular response to interleukin-6	6/997	37/28928	0.162162	4.70514	4.2607	0.00153773	0.0074403	0.00437454	Selp/Ccl2/Il6/Sbno2/Myb/Yap1	6
BP	GO:1903429	regulation of cell maturation	6/997	37/28928	0.162162	4.70514	4.2607	0.00153773	0.0074403	0.00437454	Runx1/Map3k13/Shb/Ednrb/Clec7a/Bcl11a	6
BP	GO:0031345	negative regulation of cell projection organization	17/997	218/28928	0.0779817	2.26264	3.53547	0.00155027	0.00746911	0.00439148	Dab2/Spry2/Epha4/Epha7/Prag1/Vim/Spry3/Gfap/Ptpn1/Rapgef2/Ccr5/Sema6d/Yap1/Runx1t1/Bcl11a/Id1/Ifrd1	17
BP	GO:0045923	positive regulation of fatty acid metabolic process	7/997	50/28928	0.14	4.06211	4.09428	0.0015503	0.00746911	0.00439148	Anxa1/Ptgs2/Avpr1a/Il1b/Cpt1a/Ppara/Irs2	7
BP	GO:1902041	regulation of extrinsic apoptotic signaling pathway via death domain receptors	7/997	50/28928	0.14	4.06211	4.09428	0.0015503	0.00746911	0.00439148	Thbs1/Hmox1/Icam1/Tnfaip3/Pmaip1/Serpine1/Sp100	7
BP	GO:0032655	regulation of interleukin-12 production	8/997	64/28928	0.125	3.62688	3.97473	0.00155186	0.00746911	0.00439148	Thbs1/Il10/Irak3/Tlr3/Tlr8/Clec7a/Tirap/Traf6	8
BP	GO:0046622	positive regulation of organ growth	8/997	64/28928	0.125	3.62688	3.97473	0.00155186	0.00746911	0.00439148	Nrg1/Fgfr1/Fgf2/Tgfbr3/Edn1/Yap1/Pim1/Gata4	8
BP	GO:0050832	defense response to fungus	8/997	64/28928	0.125	3.62688	3.97473	0.00155186	0.00746911	0.00439148	Cxcl1/Cx3cr1/Clec4d/Clec4e/Clec7a/Tac1/Vip/Il17ra	8
BP	GO:0043500	muscle adaptation	13/997	145/28928	0.0896552	2.60135	3.65223	0.00156935	0.00754664	0.00443707	Nr4a3/Errfi1/Tnfrsf1b/Asb2/Ece1/Lmna/Rgs4/Lmcd1/Edn1/Ppara/Oga/Camta2/Gata4	13
BP	GO:1904705	regulation of vascular associated smooth muscle cell proliferation	9/997	79/28928	0.113924	3.30551	3.87678	0.00157091	0.00754751	0.00443758	Adamts1/Hmox1/Nr4a3/Il10/Fgf2/Timp3/Edn1/Ldlrap1/Gja1	9
BP	GO:0030010	establishment of cell polarity	15/997	181/28928	0.0828729	2.40456	3.58129	0.00157767	0.00756674	0.00444889	Abl2/Plekhg3/Spry2/Frmd4b/Cyth3/Rhoj/Foxf1/Sdccag8/Cdh5/Lmna/Dock8/Gja1/Spry1/Ndel1/Kif20b	15
BP	GO:0035148	tube formation	15/997	181/28928	0.0828729	2.40456	3.58129	0.00157767	0.00756674	0.00444889	Abl2/Bcl2l11/Ptch1/Hif1a/Fgf2/Sdc4/Sdccag8/Adm/Gdnf/Sema4c/Bbs4/Sox9/Osr1/Kif20b/Traf6	15
BP	GO:0140888	interferon-mediated signaling pathway	11/997	111/28928	0.0990991	2.87536	3.74006	0.00158445	0.007586	0.00446021	Ifitm1/Sting1/Ifitm6/Parp14/Stat2/Mavs/Trim6/Trim65/Mmp12/Sin3a/Oasl2	11
BP	GO:2000243	positive regulation of reproductive process	11/997	111/28928	0.0990991	2.87536	3.74006	0.00158445	0.007586	0.00446021	Inhbb/Runx1/Ovol1/Tacr1/Ptafr/Gja1/Ednrb/Prdm9/Sox9/Tac1/Vip	11
BP	GO:0014896	muscle hypertrophy	12/997	128/28928	0.09375	2.72016	3.68497	0.00160258	0.0076661	0.00450731	Nr4a3/Errfi1/Tnfrsf1b/Ece1/Lmna/Rgs4/Lmcd1/Edn1/Ppara/Camta2/Meis1/Gata4	12
BP	GO:0002705	positive regulation of leukocyte mediated immunity	16/997	200/28928	0.08	2.3212	3.54232	0.00161768	0.00773158	0.0045458	Ccl2/Il6/Cxcl1/Pvr/Il1r1/Il18rap/Arid5a/Fcgr3/Il1b/Cd160/Ptafr/Mavs/Rasgrp1/Clec7a/Fcer1g/Traf6	16
BP	GO:0033273	response to vitamin	10/997	95/28928	0.105263	3.05422	3.78895	0.00161927	0.00773246	0.00454632	Ccl2/Stc1/Ada/Lrat/Ptgs2/Il1a/Tspo/Stc2/Pim1/Tnc	10
BP	GO:0006470	protein dephosphorylation	13/997	146/28928	0.0890411	2.58353	3.62409	0.00166966	0.00796614	0.00468371	Ppm1k/Dusp5/Dusp4/Pdp1/Ptpn1/Dusp1/Ppp3cc/Ptprr/Ptprd/Ssh1/Ctdsp1/Fam220a/Ptp4a3	13
BP	GO:0046777	protein autophosphorylation	16/997	201/28928	0.079602	2.30966	3.52019	0.0017028	0.00811718	0.00477252	Sik1/Nrg1/Errfi1/Epha4/Irak3/Fgfr1/Ripk3/Epha7/Ephb4/Rap2b/Map3k13/Flt1/Prlr/Nek6/Fgfr4/Pim1	16
BP	GO:0002709	regulation of T cell mediated immunity	12/997	129/28928	0.0930233	2.69907	3.65405	0.00171279	0.00813603	0.0047836	Lilrb4b/Lilrb4a/Il6/Tnfrsf1b/Ripk3/Pvr/Il1r1/Cd80/Arid5a/Il20rb/Il1b/Traf6	12
BP	GO:0010906	regulation of glucose metabolic process	12/997	129/28928	0.0930233	2.69907	3.65405	0.00171279	0.00813603	0.0047836	Sik1/Il6/Hif1a/Ogt/Pdk4/Rorc/Pmaip1/Ppara/Irs2/Igfbp3/Midn/Dgat2	12
BP	GO:0034440	lipid oxidation	12/997	129/28928	0.0930233	2.69907	3.65405	0.00171279	0.00813603	0.0047836	Pdk4/Crot/Slc27a2/Cpt1a/Aloxe3/Por/Ppara/Irs2/Mfsd2a/Sox9/Pla2g7/Dgat2	12
BP	GO:0080164	regulation of nitric oxide metabolic process	9/997	80/28928	0.1125	3.26419	3.83139	0.00171694	0.00813603	0.0047836	Il6/Icam1/Il10/Cx3cr1/Ptgs2/Il1b/Tspo/Clec7a/Zc3h12a	9
BP	GO:0006826	iron ion transport	8/997	65/28928	0.123077	3.57108	3.92065	0.00171715	0.00813603	0.0047836	Lcn2/Slc25a28/Hif1a/Rep15/Steap4/Slc40a1/Slc11a1/Flvcr2	8
BP	GO:0046173	polyol biosynthetic process	8/997	65/28928	0.123077	3.57108	3.92065	0.00171715	0.00813603	0.0047836	Sphk1/Ip6k2/Itpkb/Cyp2r1/Itpkc/Ptafr/Acer2/Plek	8
BP	GO:2000630	positive regulation of miRNA metabolic process	8/997	65/28928	0.123077	3.57108	3.92065	0.00171715	0.00813603	0.0047836	Fosl1/Egr1/Myc/Il10/Hif1a/Myb/Zc3h12a/Gata4	8
BP	GO:0001759	organ induction	5/997	26/28928	0.192308	5.57982	4.41394	0.00173205	0.00816433	0.00480024	Fgfr1/Fgf2/Gdnf/Spry1/Fgfr4	5
BP	GO:0002726	positive regulation of T cell cytokine production	5/997	26/28928	0.192308	5.57982	4.41394	0.00173205	0.00816433	0.00480024	Il6/Il1r1/Arid5a/Il1b/Traf6	5
BP	GO:0051931	regulation of sensory perception	5/997	26/28928	0.192308	5.57982	4.41394	0.00173205	0.00816433	0.00480024	Ccl3/Ccn3/Gpr171/F2r/Tac1	5
BP	GO:0072677	eosinophil migration	5/997	26/28928	0.192308	5.57982	4.41394	0.00173205	0.00816433	0.00480024	Ccl2/Ccl3/Adam8/Ccl7/Ccl11	5
BP	GO:0150105	protein localization to cell-cell junction	5/997	26/28928	0.192308	5.57982	4.41394	0.00173205	0.00816433	0.00480024	Ildr1/Cdh5/Tjp2/Vcl/Mpp7	5
BP	GO:1902547	regulation of cellular response to vascular endothelial growth factor stimulus	5/997	26/28928	0.192308	5.57982	4.41394	0.00173205	0.00816433	0.00480024	Spry2/Sema6a/Adamts3/Adgrg1/Ptp4a3	5
BP	GO:0042092	type 2 immune response	7/997	51/28928	0.137255	3.98246	4.02753	0.00174431	0.00820097	0.00482179	Lilrb4a/Il4ra/Il6/Anxa1/Myb/Ecm1/Bcl3	7
BP	GO:0046636	negative regulation of alpha-beta T cell activation	7/997	51/28928	0.137255	3.98246	4.02753	0.00174431	0.00820097	0.00482179	Il4ra/Cd44/Runx1/Anxa1/Cblb/Pf4/Zc3h12a	7
BP	GO:0050819	negative regulation of coagulation	7/997	51/28928	0.137255	3.98246	4.02753	0.00174431	0.00820097	0.00482179	Thbs1/Plat/Procr/Plaur/Thbd/Serpine1/Plau	7
BP	GO:0006775	fat-soluble vitamin metabolic process	6/997	38/28928	0.157895	4.58132	4.17366	0.00177352	0.00830978	0.00488576	Fgfr1/Lrat/Cyp2r1/Fgfr4/Npc1l1/Isx	6
BP	GO:0014912	negative regulation of smooth muscle cell migration	6/997	38/28928	0.157895	4.58132	4.17366	0.00177352	0.00830978	0.00488576	Trib1/Ptpn1/Sema6d/Serpine1/Igfbp3/Abhd2	6
BP	GO:0051353	positive regulation of oxidoreductase activity	6/997	38/28928	0.157895	4.58132	4.17366	0.00177352	0.00830978	0.00488576	Abl2/Ripk3/Gdnf/Il1b/Edn1/Por	6
BP	GO:0098868	bone growth	6/997	38/28928	0.157895	4.58132	4.17366	0.00177352	0.00830978	0.00488576	Thbs1/Stc1/Tgfbr2/Por/Sox9/Ecm1	6
BP	GO:0009746	response to hexose	19/997	260/28928	0.0730769	2.12033	3.42839	0.00180849	0.00846641	0.00497785	Thbs1/Ccl2/Stxbp4/Icam1/Egr1/Klf7/Hif1a/Glul/Ptgs2/Gclc/Pim3/Ogt/Gja1/Ctsl/Acvr1c/Ppara/Irs2/Sin3a/Hmga1	19
BP	GO:0001657	ureteric bud development	11/997	113/28928	0.0973451	2.82447	3.67133	0.00182971	0.00850982	0.00500337	Ptch1/Cd44/Myc/Fgfr1/Pgf/Fgf2/Sdc4/Gdnf/Spry1/Sox9/Osr1	11
BP	GO:0031343	positive regulation of cell killing	11/997	113/28928	0.0973451	2.82447	3.67133	0.00182971	0.00850982	0.00500337	Ccl2/Bcl2l11/Cxcl1/Pvr/Il18rap/Cd160/Nos2/Ccr5/Oga/Rasgrp1/Clec7a	11
BP	GO:0090132	epithelium migration	11/997	113/28928	0.0973451	2.82447	3.67133	0.00182971	0.00850982	0.00500337	Hif1a/Vim/Gab2/Tgfbr3/Tacr1/Ptprr/Tgfbr2/Serpine1/Irs2/Sox9/Tac1	11
BP	GO:0002467	germinal center formation	4/997	16/28928	0.25	7.25376	4.72736	0.00183174	0.00850982	0.00500337	Ada/Tnfaip3/Nfkb2/Bcl3	4
BP	GO:0023035	CD40 signaling pathway	4/997	16/28928	0.25	7.25376	4.72736	0.00183174	0.00850982	0.00500337	Itga5/Tnfaip3/Tnip2/Traf6	4
BP	GO:0060979	vasculogenesis involved in coronary vascular morphogenesis	4/997	16/28928	0.25	7.25376	4.72736	0.00183174	0.00850982	0.00500337	Fgfr1/Tgfbr3/Spred1/Gata4	4
BP	GO:0061687	detoxification of inorganic compound	4/997	16/28928	0.25	7.25376	4.72736	0.00183174	0.00850982	0.00500337	Mt2/Mt1/Slc11a1/Slc30a10	4
BP	GO:0090051	negative regulation of cell migration involved in sprouting angiogenesis	4/997	16/28928	0.25	7.25376	4.72736	0.00183174	0.00850982	0.00500337	Thbs1/Stard13/Spred1/Meox2	4
BP	GO:2000833	positive regulation of steroid hormone secretion	4/997	16/28928	0.25	7.25376	4.72736	0.00183174	0.00850982	0.00500337	Dab2/Runx1/Gal/Tac1	4
BP	GO:0090596	sensory organ morphogenesis	23/997	341/28928	0.0674487	1.95703	3.35871	0.00183862	0.00853454	0.00501791	Nr4a3/Spry2/Myc/Fzd2/Adamts9/Fgfr1/Hif1a/Epha2/Fgf2/Tbx3/Aldh1a3/Bcr/Flt1/Slitrk6/Edn1/Bbs4/Fjx1/Insig2/Mfsd2a/Meis1/Sox9/Osr1/Osr2	23
BP	GO:0007160	cell-matrix adhesion	18/997	241/28928	0.0746888	2.1671	3.4374	0.00185472	0.00859474	0.0050533	Thbs1/Itga5/Bcl2l11/Adamts9/Fam107a/Csf1/Adam8/Zyx/Sdc4/Ninj1/Bcr/Trem1/Acer2/Vcl/Serpine1/Plau/Mmp12/Fermt2	18
BP	GO:0010976	positive regulation of neuron projection development	18/997	241/28928	0.0746888	2.1671	3.4374	0.00185472	0.00859474	0.0050533	Adamts1/Sphk1/Hspb1/Nrg1/Cxcl5/Il6/Abl2/S100a9/Baiap2/Fgfr1/Tubb2b/Rapgef2/Ptprd/Ndel1/Scarb2/Bcl11a/Lrp8/Lif	18
BP	GO:0050864	regulation of B cell activation	13/997	148/28928	0.0878378	2.54862	3.5685	0.00188624	0.00873341	0.00513483	Lilrb4a/Ctla4/Il6/Ada/Il10/Aplf/Prlr/Tnfaip3/Tnip2/Fcgr2b/Irs2/Tirap/Bank1	13
BP	GO:0035050	embryonic heart tube development	10/997	97/28928	0.103093	2.99124	3.71139	0.00189527	0.00874183	0.00513978	Hif1a/Tbx3/Asb2/Eng/Ece1/Edn1/Gja1/Tgfbr2/Yap1/Gata4	10
BP	GO:0002931	response to ischemia	8/997	66/28928	0.121212	3.51698	3.86762	0.00189603	0.00874183	0.00513978	Rcan1/Egr1/Csf1/Gpr31b/Cx3cr1/Sqstm1/Map2k3/Gja1	8
BP	GO:0030858	positive regulation of epithelial cell differentiation	8/997	66/28928	0.121212	3.51698	3.86762	0.00189603	0.00874183	0.00513978	Ptch1/Fgf2/Gdnf/Rfx3/Sfn/Serpine1/Lif/Sox9	8
BP	GO:0032615	interleukin-12 production	8/997	66/28928	0.121212	3.51698	3.86762	0.00189603	0.00874183	0.00513978	Thbs1/Il10/Irak3/Tlr3/Tlr8/Clec7a/Tirap/Traf6	8
BP	GO:0051445	regulation of meiotic cell cycle	8/997	66/28928	0.121212	3.51698	3.86762	0.00189603	0.00874183	0.00513978	Zwint/Ovol1/Dusp1/Cdc20/Gja1/Prdm9/Lif/Osm	8
BP	GO:0032434	regulation of proteasomal ubiquitin-dependent protein catabolic process	12/997	131/28928	0.0916031	2.65787	3.59309	0.00195192	0.00899196	0.00528685	Trib1/Dab2/Csnk1e/Hspa1b/Hspa1a/Axin2/Plk3/Plk2/Gclc/Ogt/Cdc20/Cbfa2t3	12
BP	GO:0003382	epithelial cell morphogenesis	7/997	52/28928	0.134615	3.90587	3.96247	0.00195666	0.00899869	0.0052908	Stc1/Clic4/Bcl11b/Cdh5/Flnb/Pof1b/Id1	7
BP	GO:0035850	epithelial cell differentiation involved in kidney development	7/997	52/28928	0.134615	3.90587	3.96247	0.00195666	0.00899869	0.0052908	Gpr4/Gdnf/Edn1/Yap1/Ednrb/Lif/Osr1	7
BP	GO:0014002	astrocyte development	6/997	39/28928	0.153846	4.46385	4.08961	0.00203572	0.00933876	0.00549075	S100a8/S100a9/Vim/Gfap/Il1b/C5ar1	6
BP	GO:0044342	type B pancreatic cell proliferation	6/997	39/28928	0.153846	4.46385	4.08961	0.00203572	0.00933876	0.00549075	Nr4a3/Errfi1/Nr4a1/Ccn3/Irs2/Igfbp3	6
BP	GO:1903901	negative regulation of viral life cycle	6/997	39/28928	0.153846	4.46385	4.08961	0.00203572	0.00933876	0.00549075	Ch25h/Trim30d/Trim8/Ifitm1/Trim12c/Ifitm6	6
BP	GO:0031346	positive regulation of cell projection organization	29/997	471/28928	0.0615711	1.78649	3.25136	0.00205121	0.00939144	0.00552172	Adamts1/Tnfrsf12a/Sphk1/Hspb1/Nrg1/Cxcl5/Il6/Abl2/Sema7a/S100a9/Lcn2/Baiap2/Epha4/Fgfr1/Cenpj/Tubb2b/Map3k13/Rapgef2/Ptprd/Cdc42ep3/Eps8l3/Agrn/Bbs4/Cdc42ep2/Ndel1/Scarb2/Bcl11a/Lrp8/Lif	29
BP	GO:0010666	positive regulation of cardiac muscle cell apoptotic process	5/997	27/28928	0.185185	5.37316	4.29513	0.00206605	0.00939144	0.00552172	Ptpn1/Trem1/Capn2/Cxcr2/Igfbp3	5
BP	GO:0010839	negative regulation of keratinocyte proliferation	5/997	27/28928	0.185185	5.37316	4.29513	0.00206605	0.00939144	0.00552172	Ptch1/Ovol1/Klf9/Sfn/Ctsl	5
BP	GO:0032878	regulation of establishment or maintenance of cell polarity	5/997	27/28928	0.185185	5.37316	4.29513	0.00206605	0.00939144	0.00552172	Abl2/Plekhg3/Cdh5/Dock8/Kif20b	5
BP	GO:0035357	peroxisome proliferator activated receptor signaling pathway	5/997	27/28928	0.185185	5.37316	4.29513	0.00206605	0.00939144	0.00552172	Fam120b/Lmo3/Jund/Aloxe3/Hmga1	5
BP	GO:0035743	CD4-positive, alpha-beta T cell cytokine production	5/997	27/28928	0.185185	5.37316	4.29513	0.00206605	0.00939144	0.00552172	Il6/Il1r1/Il18rap/Arid5a/Il1b	5
BP	GO:0046580	negative regulation of Ras protein signal transduction	5/997	27/28928	0.185185	5.37316	4.29513	0.00206605	0.00939144	0.00552172	Spry2/Spry4/Spry3/Rabgef1/Spry1	5
BP	GO:0046716	muscle cell cellular homeostasis	5/997	27/28928	0.185185	5.37316	4.29513	0.00206605	0.00939144	0.00552172	Il6/Hif1a/Pln/Bag3/Lox	5
BP	GO:0051447	negative regulation of meiotic cell cycle	5/997	27/28928	0.185185	5.37316	4.29513	0.00206605	0.00939144	0.00552172	Zwint/Ovol1/Dusp1/Lif/Osm	5
BP	GO:1902176	negative regulation of oxidative stress-induced intrinsic apoptotic signaling pathway	5/997	27/28928	0.185185	5.37316	4.29513	0.00206605	0.00939144	0.00552172	Hspb1/Il10/Hif1a/Fgf2/Gata4	5
BP	GO:1904889	regulation of excitatory synapse assembly	5/997	27/28928	0.185185	5.37316	4.29513	0.00206605	0.00939144	0.00552172	Lrfn4/Fgfr1/Sema4a/Ptprd/Abi3bp	5
BP	GO:0018209	peptidyl-serine modification	17/997	224/28928	0.0758929	2.20203	3.41213	0.00206898	0.00939696	0.00552497	Il6/Spry2/Cd44/Ip6k2/Ntf3/Ptgs2/Plk2/Map3k13/Ogt/Crebl2/Bdkrb2/Nek6/Gadd45a/Trim6/Lif/Osm/Prkdc	17
BP	GO:0001952	regulation of cell-matrix adhesion	12/997	132/28928	0.0909091	2.63773	3.56303	0.00208136	0.00944538	0.00555344	Thbs1/Fam107a/Csf1/Sdc4/Ninj1/Trem1/Acer2/Vcl/Serpine1/Plau/Mmp12/Fermt2	12
BP	GO:0051341	regulation of oxidoreductase activity	8/997	67/28928	0.119403	3.46448	3.81561	0.00208928	0.00947347	0.00556996	Abl2/Ripk3/Eng/Il1a/Gdnf/Il1b/Edn1/Por	8
BP	GO:0001909	leukocyte mediated cytotoxicity	15/997	187/28928	0.0802139	2.32741	3.44057	0.00217171	0.00983911	0.00578493	Ccl2/Cxcl5/Cxcl1/Havcr2/Stx11/Ripk3/Pvr/Cx3cr1/Il18rap/Fcgr3/Trem1/Cd160/Fcgr2b/Rasgrp1/Klrb1b	15
BP	GO:0033173	calcineurin-NFAT signaling cascade	7/997	53/28928	0.132075	3.83218	3.899	0.00218848	0.00989057	0.00581519	Nrg1/Fhl2/Rcan1/Ppp3cc/Lmcd1/Clec7a/Chp2	7
BP	GO:0043407	negative regulation of MAP kinase activity	7/997	53/28928	0.132075	3.83218	3.899	0.00218848	0.00989057	0.00581519	Spry2/Irak3/Spry4/Ptpn1/Dusp1/Il1b/Spry1	7
BP	GO:0051403	stress-activated MAPK cascade	7/997	53/28928	0.132075	3.83218	3.899	0.00218848	0.00989057	0.00581519	Map3k13/Il1a/Il1b/Cryab/Sema4c/Inava/Clec7a	7
BP	GO:0050709	negative regulation of protein secretion	10/997	99/28928	0.10101	2.93081	3.63579	0.00220803	0.00996248	0.00585747	Klf7/Ccn3/Inhbb/Anxa1/Rhbdf1/F2r/Pim3/Il1b/Acvr1c/Midn	10
BP	GO:1900542	regulation of purine nucleotide metabolic process	10/997	99/28928	0.10101	2.93081	3.63579	0.00220803	0.00996248	0.00585747	Ier3/Myc/Hif1a/Ddit4/Ogt/Entpd1/Slc4a4/Ppara/Tspo/Cbfa2t3	10
BP	GO:0048839	inner ear development	18/997	245/28928	0.0734694	2.13172	3.36097	0.00222024	0.00999759	0.00587811	Cebpd/Nr4a3/Spry2/Fzd2/Epha4/Fgfr1/Fgf2/Sdc4/Tbx3/Aldh1a3/Bcr/Slitrk6/Maf/Insig2/Cytl1/Gsdme/Sox9/Ifi204	18
BP	GO:0007585	respiratory gaseous exchange by respiratory system	9/997	83/28928	0.108434	3.14621	3.69941	0.00222128	0.00999759	0.00587811	Stk40/Grpr/Nr4a2/Slc5a3/Ndst1/Edn1/Zfand5/Adrb2/Hmga1	9
BP	GO:0010611	regulation of cardiac muscle hypertrophy	9/997	83/28928	0.108434	3.14621	3.69941	0.00222128	0.00999759	0.00587811	Nr4a3/Errfi1/Tnfrsf1b/Ece1/Lmna/Rgs4/Lmcd1/Edn1/Ppara	9
BP	GO:0072331	signal transduction by p53 class mediator	14/997	169/28928	0.0828402	2.40361	3.45748	0.00223344	0.0100441	0.00590544	Ifi207/Cd44/Myc/Ddit4/Hexim1/Ndrg1/Bdkrb2/Spred1/Acer2/Pmaip1/Ifi213/Sp100/Bcl3/Ifi204	14
BP	GO:0062197	cellular response to chemical stress	23/997	347/28928	0.0662824	1.92319	3.26868	0.0022948	0.0103115	0.00606269	Sphk1/Hspb1/Il6/Lcn2/Ripk3/Hif1a/Ninj1/Slc2a1/Anxa1/Axl/Ptgs2/Il18rap/Ncoa7/Mgat3/Nr4a2/Mmp3/Edn1/Bdkrb2/Tnfaip3/Tspo/Slc7a11/Zc3h12a/Sin3a	23
BP	GO:0032233	positive regulation of actin filament bundle assembly	8/997	68/28928	0.117647	3.41353	3.76457	0.00229768	0.010316	0.00606534	Sh3pxd2b/Sdc4/Rgcc/Tacr1/Plek/Tac1/Id1/Fermt2	8
BP	GO:0010719	negative regulation of epithelial to mesenchymal transition	6/997	40/28928	0.15	4.35226	4.00834	0.00232616	0.0103953	0.00611193	Spry2/Epha4/Tgfbr3/Usf3/Spry1/Spred1	6
BP	GO:0044319	wound healing, spreading of cells	6/997	40/28928	0.15	4.35226	4.00834	0.00232616	0.0103953	0.00611193	Itga5/Cd44/Ccn1/Pdpn/Mmp12/Fermt2	6
BP	GO:0045672	positive regulation of osteoclast differentiation	6/997	40/28928	0.15	4.35226	4.00834	0.00232616	0.0103953	0.00611193	Ccl3/Ccr1/Klf10/Csf1/Ninj1/Traf6	6
BP	GO:0090505	epiboly involved in wound healing	6/997	40/28928	0.15	4.35226	4.00834	0.00232616	0.0103953	0.00611193	Itga5/Cd44/Ccn1/Pdpn/Mmp12/Fermt2	6
BP	GO:0002431	Fc receptor mediated stimulatory signaling pathway	4/997	17/28928	0.235294	6.82707	4.54045	0.0023305	0.0103953	0.00611193	Nr4a3/Rabgef1/Plscr1/Fcer1g	4
BP	GO:0034134	toll-like receptor 2 signaling pathway	4/997	17/28928	0.235294	6.82707	4.54045	0.0023305	0.0103953	0.00611193	Mfhas1/Acod1/Tnip2/Tirap	4
BP	GO:0043312	neutrophil degranulation	4/997	17/28928	0.235294	6.82707	4.54045	0.0023305	0.0103953	0.00611193	Stx11/Bcr/Ptafr/Anxa3	4
BP	GO:1901163	regulation of trophoblast cell migration	4/997	17/28928	0.235294	6.82707	4.54045	0.0023305	0.0103953	0.00611193	Timp1/Gja1/Acvr1c/Mmp12	4
BP	GO:0030218	erythrocyte differentiation	14/997	170/28928	0.0823529	2.38947	3.43283	0.00235866	0.0105124	0.00618077	Hspa1b/Hif1a/Hba-a2/Hba-a1/Rb1/Tgfbr3/Myb/Adgrf5/Sox6/Mfhas1/Alas2/Nemp1/Prkdc/Hmga1	14
BP	GO:0019079	viral genome replication	12/997	134/28928	0.0895522	2.59836	3.50375	0.00236132	0.0105157	0.00618271	Ifi207/Ifitm1/Nr5a2/Zfyve1/Plscr1/Tasor/Ifitm6/Ifi213/Mavs/Trim6/Zc3h12a/Oasl2	12
BP	GO:0045069	regulation of viral genome replication	10/997	100/28928	0.1	2.9015	3.5987	0.00237926	0.0105793	0.0062201	Ifi207/Ifitm1/Nr5a2/Plscr1/Tasor/Ifitm6/Ifi213/Mavs/Trim6/Oasl2	10
BP	GO:0071375	cellular response to peptide hormone stimulus	23/997	348/28928	0.066092	1.91766	3.25384	0.00237946	0.0105793	0.0062201	Ccl2/Nr4a3/Stxbp4/Socs3/Nr4a1/Inhbb/Rb1/Nr4a2/Ptpn1/Gclc/Il1b/Ogt/Pdk4/Edn1/Ndel1/Insig2/Irs2/Slc30a10/Slc27a1/Prkdc/Myo1c/Hmga1/Mbd5	23
BP	GO:0050807	regulation of synapse organization	25/997	390/28928	0.0641026	1.85994	3.23031	0.00238172	0.0105807	0.00622096	Nrg1/Lrfn4/Sema7a/Baiap2/Epha4/Il10/Fam107a/Arc/Fgfr1/Epha7/Ptpn1/Sema4a/Rapgef2/Ptprd/Ogt/Sema4c/Slitrk6/Agrn/Cdc20/Flrt2/Fcgr2b/Dgkb/Slc7a11/Abi3bp/Lrp8	25
BP	GO:0046032	ADP catabolic process	11/997	117/28928	0.0940171	2.72791	3.53827	0.00241309	0.0106865	0.00628319	Ier3/Myc/Hif1a/Pfkfb3/Ddit4/Ogt/Entpd1/Slc4a4/Ppara/Nt5e/Cbfa2t3	11
BP	GO:0072163	mesonephric epithelium development	11/997	117/28928	0.0940171	2.72791	3.53827	0.00241309	0.0106865	0.00628319	Ptch1/Cd44/Myc/Fgfr1/Pgf/Fgf2/Sdc4/Gdnf/Spry1/Sox9/Osr1	11
BP	GO:0072164	mesonephric tubule development	11/997	117/28928	0.0940171	2.72791	3.53827	0.00241309	0.0106865	0.00628319	Ptch1/Cd44/Myc/Fgfr1/Pgf/Fgf2/Sdc4/Gdnf/Spry1/Sox9/Osr1	11
BP	GO:1990874	vascular associated smooth muscle cell proliferation	9/997	84/28928	0.107143	3.10875	3.65674	0.00241334	0.0106865	0.00628319	Adamts1/Hmox1/Nr4a3/Il10/Fgf2/Timp3/Edn1/Ldlrap1/Gja1	9
BP	GO:0046633	alpha-beta T cell proliferation	7/997	54/28928	0.12963	3.76121	3.83706	0.00244093	0.0107385	0.00631375	Lilrb4a/Cd44/Myc/Cd80/Il15/Cblb/Tgfbr2	7
BP	GO:0010663	positive regulation of striated muscle cell apoptotic process	5/997	28/28928	0.178571	5.18126	4.18209	0.00244467	0.0107385	0.00631375	Ptpn1/Trem1/Capn2/Cxcr2/Igfbp3	5
BP	GO:0031639	plasminogen activation	5/997	28/28928	0.178571	5.18126	4.18209	0.00244467	0.0107385	0.00631375	Thbs1/Plat/Plaur/Serpine1/Plau	5
BP	GO:0032703	negative regulation of interleukin-2 production	5/997	28/28928	0.178571	5.18126	4.18209	0.00244467	0.0107385	0.00631375	Lilrb4b/Lilrb4a/Havcr2/Il20rb/Tnfaip3	5
BP	GO:0032727	positive regulation of interferon-alpha production	5/997	28/28928	0.178571	5.18126	4.18209	0.00244467	0.0107385	0.00631375	Tlr3/Tlr8/Mavs/Trim65/Mmp12	5
BP	GO:0033003	regulation of mast cell activation	5/997	28/28928	0.178571	5.18126	4.18209	0.00244467	0.0107385	0.00631375	Lilrb4a/Nr4a3/Rabgef1/Plscr1/Havcr1	5
BP	GO:0034104	negative regulation of tissue remodeling	5/997	28/28928	0.178571	5.18126	4.18209	0.00244467	0.0107385	0.00631375	Il6/Tnfrsf11b/Bcr/Tmem119/Gata4	5
BP	GO:0043371	negative regulation of CD4-positive, alpha-beta T cell differentiation	5/997	28/28928	0.178571	5.18126	4.18209	0.00244467	0.0107385	0.00631375	Il4ra/Runx1/Anxa1/Pf4/Zc3h12a	5
BP	GO:0046426	negative regulation of receptor signaling pathway via JAK-STAT	5/997	28/28928	0.178571	5.18126	4.18209	0.00244467	0.0107385	0.00631375	Socs3/Cish/Ptprd/Parp14/Bcl3	5
BP	GO:0072170	metanephric tubule development	5/997	28/28928	0.178571	5.18126	4.18209	0.00244467	0.0107385	0.00631375	Cxcr2/Yap1/Lif/Sox9/Osr1	5
BP	GO:0003170	heart valve development	8/997	69/28928	0.115942	3.36406	3.71449	0.00252203	0.0110518	0.00649793	Tnfrsf1b/Ccn1/Adamts9/Axin2/Rb1/Tgfbr2/Sox9/Gata4	8
BP	GO:0010662	regulation of striated muscle cell apoptotic process	8/997	69/28928	0.115942	3.36406	3.71449	0.00252203	0.0110518	0.00649793	Nrg1/Ptpn1/Trem1/Capn2/Cxcr2/Bag3/Igfbp3/Gata4	8
BP	GO:0030193	regulation of blood coagulation	8/997	69/28928	0.115942	3.36406	3.71449	0.00252203	0.0110518	0.00649793	Thbs1/Plat/S100a9/Plaur/Thbd/F2r/Serpine1/Plau	8
BP	GO:0008625	extrinsic apoptotic signaling pathway via death domain receptors	9/997	85/28928	0.105882	3.07218	3.61471	0.00261835	0.0114373	0.00672459	Thbs1/Hmox1/Tnfsf10/Icam1/Tnfaip3/Pmaip1/Serpine1/Bag3/Sp100	9
BP	GO:0010507	negative regulation of autophagy	9/997	85/28928	0.105882	3.07218	3.61471	0.00261835	0.0114373	0.00672459	Hmox1/Il10/Vps13c/Tnfaip3/Zkscan3/Tspo/Slc7a5/Qsox1/Gata4	9
BP	GO:0051145	smooth muscle cell differentiation	9/997	85/28928	0.105882	3.07218	3.61471	0.00261835	0.0114373	0.00672459	Rcan1/Ereg/Foxf1/Tbx3/Ntf3/Adm/Eng/Ednrb/Sox9	9
BP	GO:0071384	cellular response to corticosteroid stimulus	9/997	85/28928	0.105882	3.07218	3.61471	0.00261835	0.0114373	0.00672459	Ccl2/Stc1/Fam107a/Ddit4/Axin2/Anxa1/Gdnf/Klf9/Edn1	9
BP	GO:0010092	specification of animal organ identity	6/997	41/28928	0.146341	4.2461	3.9297	0.00264671	0.0114879	0.00675435	Fgfr1/Fgf2/Axin2/Gdnf/Spry1/Fgfr4	6
BP	GO:0030574	collagen catabolic process	6/997	41/28928	0.146341	4.2461	3.9297	0.00264671	0.0114879	0.00675435	Mmp19/Mmp3/Mmp8/Ctsl/Mmp10/Mmp12	6
BP	GO:0031128	developmental induction	6/997	41/28928	0.146341	4.2461	3.9297	0.00264671	0.0114879	0.00675435	Fgfr1/Fgf2/Gdnf/Spry1/Fgfr4/Sox9	6
BP	GO:0045601	regulation of endothelial cell differentiation	6/997	41/28928	0.146341	4.2461	3.9297	0.00264671	0.0114879	0.00675435	Apold1/Cdh5/Il1b/Vcl/S1pr3/Id1	6
BP	GO:0045671	negative regulation of osteoclast differentiation	6/997	41/28928	0.146341	4.2461	3.9297	0.00264671	0.0114879	0.00675435	Tnfaip6/Lilrb4b/Lilrb4a/Ccl3/Tnfrsf11b/Tjp2	6
BP	GO:0060351	cartilage development involved in endochondral bone morphogenesis	6/997	41/28928	0.146341	4.2461	3.9297	0.00264671	0.0114879	0.00675435	Thbs1/Stc1/Axin2/Tgfbr2/Por/Sox9	6
BP	GO:0071624	positive regulation of granulocyte chemotaxis	6/997	41/28928	0.146341	4.2461	3.9297	0.00264671	0.0114879	0.00675435	S100a14/Il1b/Edn1/Cxcr2/C5ar1/Tirap	6
BP	GO:0090504	epiboly	6/997	41/28928	0.146341	4.2461	3.9297	0.00264671	0.0114879	0.00675435	Itga5/Cd44/Ccn1/Pdpn/Mmp12/Fermt2	6
BP	GO:0043588	skin development	23/997	351/28928	0.0655271	1.90127	3.20964	0.00264953	0.0114911	0.00675621	Errfi1/Clic4/Bcl11b/Epha2/Ppl/Ptgs1/Runx1/Anxa1/Ptgs2/Bcr/Ovol1/Il1a/Sprr2h/Flnb/Sfn/Aloxe3/Ctsl/Yap1/Arrdc3/Sox9/Gal/Gjb3/Stfa2l1	23
BP	GO:0099175	regulation of postsynapse organization	15/997	191/28928	0.078534	2.27867	3.34973	0.00266273	0.0115392	0.00678452	Lrfn4/Baiap2/Epha4/Fam107a/Arc/Fgfr1/Epha7/Ptpn1/Ptprd/Sema4c/Flrt2/Fcgr2b/Dgkb/Abi3bp/Lrp8	15
BP	GO:0072009	nephron epithelium development	12/997	136/28928	0.0882353	2.56015	3.44553	0.00267125	0.011567	0.00680084	Ptch1/Cd44/Myc/Pgf/Fgf2/Gdnf/Edn1/Yap1/Ednrb/Lif/Sox9/Osr1	12
BP	GO:1901222	regulation of non-canonical NF-kappaB signal transduction	10/997	102/28928	0.0980392	2.84461	3.52589	0.00275367	0.0119145	0.00700514	Sphk1/Havcr2/Ccn3/Tlr3/Cd86/Il1b/Edn1/Zc3h12a/Ptp4a3/Bcl3	10
BP	GO:0001892	embryonic placenta development	11/997	119/28928	0.092437	2.68206	3.47382	0.00275662	0.0119178	0.00700712	Socs3/Ccn1/Il10/Hif1a/Junb/Adm/Cebpb/Mdfi/Nr2f2/Phlda2/Lif	11
BP	GO:0006919	activation of cysteine-type endopeptidase activity involved in apoptotic process	8/997	70/28928	0.114286	3.31601	3.66532	0.00276316	0.0119179	0.00700717	S100a8/Bcl2l11/S100a9/Myc/F3/F2r/Acer2/Pmaip1	8
BP	GO:0009064	glutamine family amino acid metabolic process	8/997	70/28928	0.114286	3.31601	3.66532	0.00276316	0.0119179	0.00700717	Gfpt2/Nags/Glul/Ctps1/Gclc/Ppat/Nos2/Slc7a11	8
BP	GO:2000401	regulation of lymphocyte migration	8/997	70/28928	0.114286	3.31601	3.66532	0.00276316	0.0119179	0.00700717	Ccl3/Abl2/Ripk3/Adam8/Ccl7/Dock8/Cxcl10/Ecm1	8
BP	GO:0003206	cardiac chamber morphogenesis	13/997	155/28928	0.083871	2.43352	3.38091	0.00283441	0.0121976	0.0071716	Adamts1/Nrg1/Fhl2/Fzd2/Ccn1/Hif1a/Foxf1/Tbx3/Tgfbr3/Eng/Tgfbr2/Ube4b/Gata4	13
BP	GO:0141060	disruption of anatomical structure in another organism	13/997	155/28928	0.083871	2.43352	3.38091	0.00283441	0.0121976	0.0071716	Cxcl5/Bcl2l11/Cxcl1/Ninj1/Trem1/Ccl11/Nos2/Gbp2b/Cxcl10/Gbp2/Clec7a/Nts/Tac1	13
BP	GO:0014743	regulation of muscle hypertrophy	9/997	86/28928	0.104651	3.03646	3.57329	0.00283691	0.0121976	0.0071716	Nr4a3/Errfi1/Tnfrsf1b/Ece1/Lmna/Rgs4/Lmcd1/Edn1/Ppara	9
BP	GO:0034103	regulation of tissue remodeling	9/997	86/28928	0.104651	3.03646	3.57329	0.00283691	0.0121976	0.0071716	Il6/Adam8/Tnfrsf11b/Bcr/Pdk4/Gja1/S1pr1/Tmem119/Gata4	9
BP	GO:0002523	leukocyte migration involved in inflammatory response	5/997	29/28928	0.172414	5.00259	4.07432	0.00287123	0.0122682	0.00721312	S100a8/Ccl2/S100a9/Adam8/Ninj1	5
BP	GO:0032303	regulation of icosanoid secretion	5/997	29/28928	0.172414	5.00259	4.07432	0.00287123	0.0122682	0.00721312	Ptges/Il1a/Il1b/Edn1/Acsl4	5
BP	GO:0035809	regulation of urine volume	5/997	29/28928	0.172414	5.00259	4.07432	0.00287123	0.0122682	0.00721312	Adm/Edn1/Btc/Ednrb/Adrb2	5
BP	GO:0035988	chondrocyte proliferation	5/997	29/28928	0.172414	5.00259	4.07432	0.00287123	0.0122682	0.00721312	Errfi1/Stc1/Ccn3/Golgb1/Sox9	5
BP	GO:0045932	negative regulation of muscle contraction	5/997	29/28928	0.172414	5.00259	4.07432	0.00287123	0.0122682	0.00721312	Gucy1a1/Ptgs2/Calca/Adrb2/Zc3h12a	5
BP	GO:0060444	branching involved in mammary gland duct morphogenesis	5/997	29/28928	0.172414	5.00259	4.07432	0.00287123	0.0122682	0.00721312	Areg/Csf1/Epha2/Tbx3/Ccl11	5
BP	GO:1900017	positive regulation of cytokine production involved in inflammatory response	5/997	29/28928	0.172414	5.00259	4.07432	0.00287123	0.0122682	0.00721312	Il6/Hif1a/Tlr3/Clec7a/Il17ra	5
BP	GO:1902894	negative regulation of miRNA transcription	5/997	29/28928	0.172414	5.00259	4.07432	0.00287123	0.0122682	0.00721312	Lilrb4b/Lilrb4a/Hif1a/Ppara/Sox9	5
BP	GO:0000209	protein polyubiquitination	19/997	271/28928	0.0701107	2.03427	3.23189	0.00287767	0.0122861	0.00722367	Rnf152/Trim30d/Trim8/Rnf170/Arel1/Wsb2/Trim12c/Rnf186/Klhl42/Skp2/Znrf1/Tnfaip3/Ube4b/Dzip3/Dtx3l/Trim6/Trim65/Kbtbd7/Traf6	19
BP	GO:0001886	endothelial cell morphogenesis	4/997	18/28928	0.222222	6.44779	4.36806	0.00291533	0.0123603	0.00726727	Stc1/Clic4/Cdh5/Id1	4
BP	GO:0002827	positive regulation of T-helper 1 type immune response	4/997	18/28928	0.222222	6.44779	4.36806	0.00291533	0.0123603	0.00726727	Il1r1/Arid5a/Il1b/Slc11a1	4
BP	GO:0002883	regulation of hypersensitivity	4/997	18/28928	0.222222	6.44779	4.36806	0.00291533	0.0123603	0.00726727	Il20rb/Fcgr3/Fcgr2b/Fcer1g	4
BP	GO:0021781	glial cell fate commitment	4/997	18/28928	0.222222	6.44779	4.36806	0.00291533	0.0123603	0.00726727	Nrg1/Ntf3/Sox6/Sox9	4
BP	GO:0035672	oligopeptide transmembrane transport	4/997	18/28928	0.222222	6.44779	4.36806	0.00291533	0.0123603	0.00726727	Abcc1/Gja1/Slc15a3/Slc7a11	4
BP	GO:0035733	hepatic stellate cell activation	4/997	18/28928	0.222222	6.44779	4.36806	0.00291533	0.0123603	0.00726727	Akap12/Fgfr1/Myb/Gclc	4
BP	GO:0045837	negative regulation of membrane potential	4/997	18/28928	0.222222	6.44779	4.36806	0.00291533	0.0123603	0.00726727	Il6/Rnf122/Il1rn/Pmaip1	4
BP	GO:0045986	negative regulation of smooth muscle contraction	4/997	18/28928	0.222222	6.44779	4.36806	0.00291533	0.0123603	0.00726727	Gucy1a1/Ptgs2/Calca/Adrb2	4
BP	GO:0061450	trophoblast cell migration	4/997	18/28928	0.222222	6.44779	4.36806	0.00291533	0.0123603	0.00726727	Timp1/Gja1/Acvr1c/Mmp12	4
BP	GO:0006022	aminoglycan metabolic process	11/997	120/28928	0.0916667	2.65971	3.4421	0.00294259	0.0124662	0.00732956	Tnfaip6/Hs3st1/Cd44/Fgf2/Cemip2/Il1b/Lyve1/Ndst1/Il15/Has1/Ednrb	11
BP	GO:0060603	mammary gland duct morphogenesis	6/997	42/28928	0.142857	4.14501	3.85353	0.00299925	0.0126768	0.00745339	Areg/Ptch1/Csf1/Epha2/Tbx3/Ccl11	6
BP	GO:0070741	response to interleukin-6	6/997	42/28928	0.142857	4.14501	3.85353	0.00299925	0.0126768	0.00745339	Selp/Ccl2/Il6/Sbno2/Myb/Yap1	6
BP	GO:1905314	semi-lunar valve development	6/997	42/28928	0.142857	4.14501	3.85353	0.00299925	0.0126768	0.00745339	Tnfrsf1b/Axin2/Rb1/Tgfbr2/Sox9/Gata4	6
BP	GO:0034605	cellular response to heat	7/997	56/28928	0.125	3.62688	3.71751	0.00301249	0.012723	0.00748054	Hmox1/Hspa1b/Ptgs2/Il1a/Chordc1/Bag3/Zfp976	7
BP	GO:0006879	intracellular iron ion homeostasis	8/997	71/28928	0.112676	3.2693	3.61703	0.0030219	0.0127431	0.00749236	Hmox1/Lcn2/Myc/Hif1a/Steap4/Alas2/Slc40a1/Slc11a1	8
BP	GO:0051148	negative regulation of muscle cell differentiation	8/997	71/28928	0.112676	3.2693	3.61703	0.0030219	0.0127431	0.00749236	Rcan1/Ereg/Ccn3/Sox6/Rgs4/Bhlha15/Ppara/Tmem119	8
BP	GO:0003151	outflow tract morphogenesis	9/997	87/28928	0.103448	3.00156	3.53247	0.00306962	0.0129344	0.00760483	Thbs1/Fzd2/Hif1a/Tbx3/Tgfbr3/Eng/Edn1/Tgfbr2/Gata4	9
BP	GO:0120254	olefinic compound metabolic process	15/997	194/28928	0.0773196	2.24343	3.28307	0.00308833	0.0130032	0.0076453	Sphk1/Rdh10/Akr1b8/Dab2/Egr1/Lrat/Ptgs1/Aldh1a3/Ptgs2/H6pd/Aloxe3/Ednrb/Ptgr1/Dgat2/Ces2a	15
BP	GO:0050803	regulation of synapse structure or activity	25/997	398/28928	0.0628141	1.82255	3.12184	0.00310733	0.0130732	0.00768644	Nrg1/Lrfn4/Sema7a/Baiap2/Epha4/Il10/Fam107a/Arc/Fgfr1/Epha7/Ptpn1/Sema4a/Rapgef2/Ptprd/Ogt/Sema4c/Slitrk6/Agrn/Cdc20/Flrt2/Fcgr2b/Dgkb/Slc7a11/Abi3bp/Lrp8	25
BP	GO:1903050	regulation of proteolysis involved in protein catabolic process	17/997	233/28928	0.0729614	2.11698	3.23426	0.00311422	0.0130921	0.00769756	Trib1/Dab2/Csnk1e/Epha4/Hspa1b/Hspa1a/Prkcg/Axin2/Plk3/Rhbdf1/Plk2/Gclc/Ogt/Cdc20/Bag2/Cbfa2t3/Herpud1	17
BP	GO:0009137	purine nucleoside diphosphate catabolic process	11/997	121/28928	0.0909091	2.63773	3.41069	0.00313853	0.0131741	0.00774577	Ier3/Myc/Hif1a/Pfkfb3/Ddit4/Ogt/Entpd1/Slc4a4/Ppara/Nt5e/Cbfa2t3	11
BP	GO:0009181	purine ribonucleoside diphosphate catabolic process	11/997	121/28928	0.0909091	2.63773	3.41069	0.00313853	0.0131741	0.00774577	Ier3/Myc/Hif1a/Pfkfb3/Ddit4/Ogt/Entpd1/Slc4a4/Ppara/Nt5e/Cbfa2t3	11
BP	GO:0043525	positive regulation of neuron apoptotic process	10/997	104/28928	0.0961538	2.78991	3.45483	0.00317372	0.0133117	0.00782663	Ccl3/Bcl2l11/Lcn2/Egr1/Epha7/Myb/Il1b/Agrn/Ccr5/Pmaip1	10
BP	GO:0006887	exocytosis	25/997	399/28928	0.0626566	1.81799	3.10846	0.00320996	0.0134534	0.00790995	Tnfaip2/Hmox1/Nr4a3/Il4ra/Ccl3/Ccr1/D6Wsu163e/Stx11/Sdc4/Prkcg/Foxf1/Anxa1/Gab2/Rabgef1/Bcr/Pld2/Cd160/Ptafr/Tph1/Plek/Anxa3/Rasgrp1/P2ry4/Fcer1g/Cplane2	25
BP	GO:0045668	negative regulation of osteoblast differentiation	8/997	72/28928	0.111111	3.22389	3.56959	0.0032991	0.0138164	0.0081234	Tnfaip6/Areg/Ptch1/Fgfr1/Id3/Axin2/Sox9/Id1	8
BP	GO:0003179	heart valve morphogenesis	7/997	57/28928	0.122807	3.56325	3.65977	0.00333404	0.0139521	0.00820317	Ccn1/Adamts9/Axin2/Rb1/Tgfbr2/Sox9/Gata4	7
BP	GO:0046031	ADP metabolic process	11/997	122/28928	0.0901639	2.61611	3.3796	0.00334481	0.0139775	0.00821812	Ier3/Myc/Hif1a/Pfkfb3/Ddit4/Ogt/Entpd1/Slc4a4/Ppara/Nt5e/Cbfa2t3	11
BP	GO:0033559	unsaturated fatty acid metabolic process	13/997	158/28928	0.0822785	2.38731	3.30361	0.00334522	0.0139775	0.00821812	Sphk1/Ptgs1/Scd2/Anxa1/Ptges/Ptgs2/Pdpn/Avpr1a/Il1b/Edn1/Aloxe3/Ptgr1/Ces2a	13
BP	GO:0003180	aortic valve morphogenesis	5/997	30/28928	0.166667	4.83584	3.9714	0.00334906	0.0139829	0.00822129	Axin2/Rb1/Tgfbr2/Sox9/Gata4	5
BP	GO:0040020	regulation of meiotic nuclear division	6/997	43/28928	0.139535	4.04861	3.77969	0.0033857	0.0140716	0.00827342	Zwint/Cdc20/Gja1/Prdm9/Lif/Osm	6
BP	GO:0045589	regulation of regulatory T cell differentiation	6/997	43/28928	0.139535	4.04861	3.77969	0.0033857	0.0140716	0.00827342	Lilrb4b/Lilrb4a/Hspb1/Ctla4/Cd44/Ctla2a	6
BP	GO:0046006	regulation of activated T cell proliferation	6/997	43/28928	0.139535	4.04861	3.77969	0.0033857	0.0140716	0.00827342	Lilrb4b/Lilrb4a/Ripk3/Cd86/Lrrc32/Icosl	6
BP	GO:0061081	positive regulation of myeloid leukocyte cytokine production involved in immune response	6/997	43/28928	0.139535	4.04861	3.77969	0.0033857	0.0140716	0.00827342	Nr4a3/Sema7a/Tlr3/Mavs/Tirap/Fcer1g	6
BP	GO:1904646	cellular response to amyloid-beta	6/997	43/28928	0.139535	4.04861	3.77969	0.0033857	0.0140716	0.00827342	Icam1/Epha4/Abcc1/Gja1/Fcgr2b/Adrb2	6
BP	GO:1905332	positive regulation of morphogenesis of an epithelium	6/997	43/28928	0.139535	4.04861	3.77969	0.0033857	0.0140716	0.00827342	Lcn2/Fgf2/Gdnf/Gja1/Lif/Sox9	6
BP	GO:0042770	signal transduction in response to DNA damage	15/997	196/28928	0.0765306	2.22054	3.23931	0.003402	0.0141181	0.00830081	Ier3/Cd44/Ndrg1/Donson/Spred1/Acer2/Pmaip1/Yap1/Nek1/Dtx3l/Gadd45a/Sde2/Sp100/Prkdc/Bcl3	15
BP	GO:0042475	odontogenesis of dentin-containing tooth	10/997	105/28928	0.0952381	2.76334	3.41992	0.00340206	0.0141181	0.00830081	Bcl2l11/Csf1/Bcl11b/Tnfrsf11b/Csf3r/Adm/Serpine1/Ppara/Tnc/Traf6	10
BP	GO:0006650	glycerophospholipid metabolic process	19/997	276/28928	0.0688406	1.99741	3.14563	0.00351507	0.0145761	0.00857007	Pgap1/Mboat1/Lrat/Ip6k2/Itpkb/Itpkc/Plscr1/Pld2/Capn2/Agpat4/Plch1/Plek/Prdx6/Dgkb/Pgs1/Mfsd2a/Pla2g7/Slc27a1/Napepld	19
BP	GO:0009880	embryonic pattern specification	9/997	89/28928	0.101124	2.93411	3.45256	0.00358005	0.0147429	0.00866813	Pgap1/Ptch1/Nrarp/Tbx3/Tasor/Zbtb16/Meis2/Meox2/Meis1	9
BP	GO:0051258	protein polymerization	20/997	297/28928	0.0673401	1.95388	3.12182	0.00358615	0.0147429	0.00866813	Csf3/Icam1/Baiap2/Hspa1b/Hspa1a/Fam107a/Cenpj/Cdh5/Ccl11/Cdc42ep3/Ssh1/Tppp/Fhdc1/Bbs4/Cracd/Cdc42ep2/Ndel1/Pstpip2/Trim6/Myo1c	20
BP	GO:0032479	regulation of type I interferon production	12/997	141/28928	0.0851064	2.46937	3.30444	0.00359253	0.0147429	0.00866813	Havcr2/Cd14/Polr3g/Tlr3/Acod1/Sting1/Tlr8/Mavs/Tirap/Trim65/Mmp12/Traf6	12
BP	GO:0030214	hyaluronan catabolic process	4/997	19/28928	0.210526	6.10843	4.20827	0.00359303	0.0147429	0.00866813	Cd44/Fgf2/Cemip2/Lyve1	4
BP	GO:0032695	negative regulation of interleukin-12 production	4/997	19/28928	0.210526	6.10843	4.20827	0.00359303	0.0147429	0.00866813	Thbs1/Il10/Irak3/Tlr8	4
BP	GO:0072148	epithelial cell fate commitment	4/997	19/28928	0.210526	6.10843	4.20827	0.00359303	0.0147429	0.00866813	Pdpn/Nr2f2/Gata4/Flvcr2	4
BP	GO:0097254	renal tubular secretion	4/997	19/28928	0.210526	6.10843	4.20827	0.00359303	0.0147429	0.00866813	Stc1/Edn1/Abcg2/Ednrb	4
BP	GO:1901550	regulation of endothelial cell development	4/997	19/28928	0.210526	6.10843	4.20827	0.00359303	0.0147429	0.00866813	Cdh5/Il1b/Vcl/S1pr3	4
BP	GO:1903140	regulation of establishment of endothelial barrier	4/997	19/28928	0.210526	6.10843	4.20827	0.00359303	0.0147429	0.00866813	Cdh5/Il1b/Vcl/S1pr3	4
BP	GO:2000679	positive regulation of transcription regulatory region DNA binding	4/997	19/28928	0.210526	6.10843	4.20827	0.00359303	0.0147429	0.00866813	Rb1/Niban2/Trim6/Traf6	4
BP	GO:2000696	regulation of epithelial cell differentiation involved in kidney development	4/997	19/28928	0.210526	6.10843	4.20827	0.00359303	0.0147429	0.00866813	Gdnf/Yap1/Lif/Osr1	4
BP	GO:0003143	embryonic heart tube morphogenesis	8/997	73/28928	0.109589	3.17973	3.52298	0.00359563	0.0147429	0.00866813	Hif1a/Tbx3/Asb2/Eng/Gja1/Tgfbr2/Yap1/Gata4	8
BP	GO:0014911	positive regulation of smooth muscle cell migration	8/997	73/28928	0.109589	3.17973	3.52298	0.00359563	0.0147429	0.00866813	Adamts1/Nr4a3/Egr1/Myc/F3/Ssh1/Sema6d/Plau	8
BP	GO:0070613	regulation of protein processing	8/997	73/28928	0.109589	3.17973	3.52298	0.00359563	0.0147429	0.00866813	Thbs1/Plat/Il1r2/Plaur/Ctla2a/Bag2/Serpine1/Plau	8
BP	GO:2001244	positive regulation of intrinsic apoptotic signaling pathway	8/997	73/28928	0.109589	3.17973	3.52298	0.00359563	0.0147429	0.00866813	S100a8/Bcl2l11/S100a9/Myc/Ripk3/Plscr1/Pmaip1/Gsdme	8
BP	GO:0003044	regulation of systemic arterial blood pressure mediated by a chemical signal	7/997	58/28928	0.12069	3.50182	3.60331	0.0036811	0.0150708	0.00886093	Ece1/F2r/Tacr1/Avpr1a/Edn1/Ednrb/Adrb2	7
BP	GO:1902895	positive regulation of miRNA transcription	7/997	58/28928	0.12069	3.50182	3.60331	0.0036811	0.0150708	0.00886093	Fosl1/Egr1/Myc/Il10/Hif1a/Myb/Gata4	7
BP	GO:0032412	regulation of monoatomic ion transmembrane transporter activity	15/997	198/28928	0.0757576	2.19811	3.19608	0.00374133	0.015306	0.00899918	Ccl2/Gem/Kcne4/Arc/Kcne3/Gpr35/Pln/Fgf11/Agrn/Edn1/Hspa2/Adrb2/Osr1/Gal/Scn3b	15
BP	GO:0141193	nuclear receptor-mediated signaling pathway	14/997	179/28928	0.0782123	2.26933	3.21845	0.00376806	0.0154038	0.00905672	Errfi1/Dab2/Fam120b/Aldh1a3/Per1/Prmt2/Lmo3/Skp2/Klf9/Jund/Aloxe3/Pim1/Cry2/Hmga1	14
BP	GO:0042908	xenobiotic transport	6/997	44/28928	0.136364	3.9566	3.70805	0.003808	0.0155208	0.00912549	Abcc1/Slc2a1/Abcg2/Slc43a3/Gja1/Slc7a5	6
BP	GO:0051154	negative regulation of striated muscle cell differentiation	6/997	44/28928	0.136364	3.9566	3.70805	0.003808	0.0155208	0.00912549	Ccn3/Sox6/Rgs4/Bhlha15/Ppara/Tmem119	6
BP	GO:1904036	negative regulation of epithelial cell apoptotic process	6/997	44/28928	0.136364	3.9566	3.70805	0.003808	0.0155208	0.00912549	Hmox1/Myc/Rb1/Btc/Yap1/Ppara	6
BP	GO:2000403	positive regulation of lymphocyte migration	6/997	44/28928	0.136364	3.9566	3.70805	0.003808	0.0155208	0.00912549	Ccl3/Abl2/Adam8/Ccl7/Dock8/Cxcl10	6
BP	GO:0032481	positive regulation of type I interferon production	9/997	90/28928	0.1	2.9015	3.41344	0.00385905	0.0157172	0.00924096	Cd14/Polr3g/Tlr3/Sting1/Tlr8/Mavs/Trim65/Mmp12/Traf6	9
BP	GO:0002888	positive regulation of myeloid leukocyte mediated immunity	5/997	31/28928	0.16129	4.67985	3.87293	0.00388148	0.01575	0.00926026	Cxcl1/Fcgr3/Ptafr/Mavs/Fcer1g	5
BP	GO:0003085	negative regulation of systemic arterial blood pressure	5/997	31/28928	0.16129	4.67985	3.87293	0.00388148	0.01575	0.00926026	Ier3/Calca/Bbs4/Adrb2/Tac1	5
BP	GO:0032958	inositol phosphate biosynthetic process	5/997	31/28928	0.16129	4.67985	3.87293	0.00388148	0.01575	0.00926026	Ip6k2/Itpkb/Itpkc/Ptafr/Plek	5
BP	GO:0060561	apoptotic process involved in morphogenesis	5/997	31/28928	0.16129	4.67985	3.87293	0.00388148	0.01575	0.00926026	Bcl2l11/Tnfrsf1b/Ccn1/Tgfbr3/Cryab	5
BP	GO:1904893	negative regulation of receptor signaling pathway via STAT	5/997	31/28928	0.16129	4.67985	3.87293	0.00388148	0.01575	0.00926026	Socs3/Cish/Ptprd/Parp14/Bcl3	5
BP	GO:0010656	negative regulation of muscle cell apoptotic process	8/997	74/28928	0.108108	3.13676	3.47716	0.00391237	0.0158402	0.00931328	Hmox1/Nr4a3/Nrg1/Edn1/Bag3/Slc7a5/Zc3h12a/Gata4	8
BP	GO:0045912	negative regulation of carbohydrate metabolic process	8/997	74/28928	0.108108	3.13676	3.47716	0.00391237	0.0158402	0.00931328	Sik1/Il6/Ier3/Ddit4/Plek/Ppara/Cbfa2t3/Midn	8
BP	GO:0070534	protein K63-linked ubiquitination	8/997	74/28928	0.108108	3.13676	3.47716	0.00391237	0.0158402	0.00931328	Rnf152/Trim30d/Trim8/Trim12c/Rnf186/Skp2/Trim65/Traf6	8
BP	GO:0072006	nephron development	14/997	180/28928	0.0777778	2.25673	3.19543	0.00395991	0.0160208	0.00941949	Gpr4/Ptch1/Cd44/Egr1/Myc/Pgf/Fgf2/Gdnf/Edn1/Yap1/Ednrb/Lif/Sox9/Osr1	14
BP	GO:0002377	immunoglobulin production	12/997	143/28928	0.0839161	2.43483	3.24968	0.00402608	0.0162547	0.00955697	Lilrb4a/Il4ra/Il6/Il10/Lig4/Cd86/Aplf/Tnfaip3/Icosl/Fcgr2b/Prkdc/Traf6	12
BP	GO:0007088	regulation of mitotic nuclear division	11/997	125/28928	0.088	2.55332	3.28817	0.00402957	0.0162547	0.00955697	Sphk1/Ereg/Zwint/Rgcc/Rb1/Il1a/Dusp1/Il1b/Edn1/Btc/Cdc20	11
BP	GO:0009191	ribonucleoside diphosphate catabolic process	11/997	125/28928	0.088	2.55332	3.28817	0.00402957	0.0162547	0.00955697	Ier3/Myc/Hif1a/Pfkfb3/Ddit4/Ogt/Entpd1/Slc4a4/Ppara/Nt5e/Cbfa2t3	11
BP	GO:0055006	cardiac cell development	11/997	125/28928	0.088	2.55332	3.28817	0.00402957	0.0162547	0.00955697	Fhl2/Tbx3/Tgfbr3/Asb2/Lmna/Rgs4/Edn1/Spry1/Ppara/Meis1/Gata4	11
BP	GO:0006863	purine nucleobase transport	3/997	10/28928	0.3	8.70451	4.60381	0.00408405	0.0163541	0.00961544	Slc28a2/Slc28a2b/Slc43a3	3
BP	GO:0015851	nucleobase transport	3/997	10/28928	0.3	8.70451	4.60381	0.00408405	0.0163541	0.00961544	Slc28a2/Slc28a2b/Slc43a3	3
BP	GO:0016068	type I hypersensitivity	3/997	10/28928	0.3	8.70451	4.60381	0.00408405	0.0163541	0.00961544	Fcgr3/Fcgr2b/Fcer1g	3
BP	GO:0019835	cytolysis	3/997	10/28928	0.3	8.70451	4.60381	0.00408405	0.0163541	0.00961544	Ninj1/Gbp2b/Gbp2	3
BP	GO:0031666	positive regulation of lipopolysaccharide-mediated signaling pathway	3/997	10/28928	0.3	8.70451	4.60381	0.00408405	0.0163541	0.00961544	Cd14/Cd180/Traf6	3
BP	GO:0048671	negative regulation of collateral sprouting	3/997	10/28928	0.3	8.70451	4.60381	0.00408405	0.0163541	0.00961544	Epha7/Bcl11a/Ifrd1	3
BP	GO:0060136	embryonic process involved in female pregnancy	3/997	10/28928	0.3	8.70451	4.60381	0.00408405	0.0163541	0.00961544	Junb/Abcg2/Acsl4	3
BP	GO:0070432	regulation of nucleotide-binding oligomerization domain containing 2 signaling pathway	3/997	10/28928	0.3	8.70451	4.60381	0.00408405	0.0163541	0.00961544	Hspa1b/Tnfaip3/Slc15a3	3
BP	GO:2000192	negative regulation of fatty acid transport	3/997	10/28928	0.3	8.70451	4.60381	0.00408405	0.0163541	0.00961544	Thbs1/Acsl4/Irs2	3
BP	GO:2001187	positive regulation of CD8-positive, alpha-beta T cell activation	3/997	10/28928	0.3	8.70451	4.60381	0.00408405	0.0163541	0.00961544	Lilrb4b/Lilrb4a/Runx1	3
BP	GO:1903305	regulation of regulated secretory pathway	13/997	162/28928	0.0802469	2.32837	3.20326	0.00414015	0.0165666	0.0097404	Hmox1/Il4ra/D6Wsu163e/Prkcg/Foxf1/Gab2/Rabgef1/Bcr/Pld2/Cd160/Ptafr/P2ry4/Fcer1g	13
BP	GO:0150076	neuroinflammatory response	9/997	91/28928	0.0989011	2.86962	3.37485	0.00415478	0.016613	0.00976769	Sphk1/Tnfrsf1b/Cx3cr1/Tlr3/Ptgs2/Cd200l1/Il1b/C5ar1/Mmp8	9
BP	GO:0021537	telencephalon development	21/997	322/28928	0.0652174	1.89229	3.042	0.00418229	0.0167109	0.00982522	Nr4a3/Nrg1/Sema7a/Fgfr1/Hif1a/Tubb2a/Bcl11b/Sema6b/Slc2a1/Aldh1a3/Id4/Tubb2b/Atat1/Avpr1a/Adgrg1/Bbs4/Anxa3/Ndel1/Slc7a11/Mfsd2a/Lrp8	21
BP	GO:0048662	negative regulation of smooth muscle cell proliferation	8/997	75/28928	0.106667	3.09494	3.43212	0.00425021	0.0169575	0.00997022	Hmox1/Trib1/Il10/Timp3/Il15/Tnfaip3/Igfbp3/Vip	8
BP	GO:1905330	regulation of morphogenesis of an epithelium	8/997	75/28928	0.106667	3.09494	3.43212	0.00425021	0.0169575	0.00997022	Lcn2/Fgfr1/Fgf2/Gdnf/Gja1/Cxcl10/Lif/Sox9	8
BP	GO:0048259	regulation of receptor-mediated endocytosis	12/997	144/28928	0.0833333	2.41792	3.22265	0.00425808	0.0169766	0.00998143	Nrg1/Dab2/Sele/Arc/Ntf3/Tamalin/Rabgef1/Plk2/Pld2/Ldlrap1/Cblb/Serpine1	12
BP	GO:0002335	mature B cell differentiation	6/997	45/28928	0.133333	3.86867	3.6385	0.00426809	0.0169918	0.00999037	Lilrb4a/Il6/Ada/Il10/Tnfaip3/Bcl3	6
BP	GO:0050922	negative regulation of chemotaxis	6/997	45/28928	0.133333	3.86867	3.6385	0.00426809	0.0169918	0.00999037	Thbs1/Tnfaip6/Ccn3/Dusp1/Ptgr1/St6gal1	6
BP	GO:0060840	artery development	11/997	126/28928	0.0873016	2.53306	3.25828	0.00428112	0.0170313	0.0100136	Adamts9/Ephb4/Adamts6/Foxf1/Egr2/Eng/Adgrf5/Ndst1/Edn1/Tgfbr2/Lox	11
BP	GO:0016236	macroautophagy	21/997	323/28928	0.0650155	1.88643	3.02677	0.00433245	0.0172118	0.0101198	Hmox1/Hif1a/Zfyve1/Vps13c/Gm5431/Rnf186/Sqstm1/Ogt/Znrf1/Scoc/Sting1/Snx18/Tspo/Bag3/Gabarapl1/Hspb8/Qsox1/Adrb2/Rab19/9930111J21Rik1/Traf6	21
BP	GO:0034599	cellular response to oxidative stress	18/997	261/28928	0.0689655	2.00104	3.06927	0.00434115	0.0172118	0.0101198	Sphk1/Hspb1/Il6/Lcn2/Ripk3/Hif1a/Anxa1/Axl/Il18rap/Ncoa7/Mgat3/Nr4a2/Mmp3/Edn1/Tnfaip3/Slc7a11/Zc3h12a/Sin3a	18
BP	GO:0050768	negative regulation of neurogenesis	13/997	163/28928	0.0797546	2.31408	3.17863	0.00436099	0.0172118	0.0101198	Epha7/Id4/Rb1/Rapgef2/Ccl11/Il1b/Ctdsp1/Ccr5/Sema6d/Tspo/Bcl11a/Id1/Ifrd1	13
BP	GO:1904950	negative regulation of establishment of protein localization	13/997	163/28928	0.0797546	2.31408	3.17863	0.00436099	0.0172118	0.0101198	Klf7/Ccn3/Inhbb/Anxa1/Rhbdf1/F2r/Pim3/Il1b/Ogt/Acvr1c/Bag3/Sp100/Midn	13
BP	GO:0015802	basic amino acid transport	4/997	20/28928	0.2	5.80301	4.05953	0.00437016	0.0172118	0.0101198	Slc7a1/Slc11a1/Slc7a5/Slc38a9	4
BP	GO:0030502	negative regulation of bone mineralization	4/997	20/28928	0.2	5.80301	4.05953	0.00437016	0.0172118	0.0101198	Ccr1/Hif1a/Sox9/Ecm1	4
BP	GO:0044320	cellular response to leptin stimulus	4/997	20/28928	0.2	5.80301	4.05953	0.00437016	0.0172118	0.0101198	Nr4a3/Inhbb/Prmt2/Bbs4	4
BP	GO:0061469	regulation of type B pancreatic cell proliferation	4/997	20/28928	0.2	5.80301	4.05953	0.00437016	0.0172118	0.0101198	Nr4a3/Errfi1/Nr4a1/Irs2	4
BP	GO:0070886	positive regulation of calcineurin-NFAT signaling cascade	4/997	20/28928	0.2	5.80301	4.05953	0.00437016	0.0172118	0.0101198	Nrg1/Ppp3cc/Lmcd1/Chp2	4
BP	GO:0071294	cellular response to zinc ion	4/997	20/28928	0.2	5.80301	4.05953	0.00437016	0.0172118	0.0101198	Mt2/Zfp616/Mt1/Tspo	4
BP	GO:0072087	renal vesicle development	4/997	20/28928	0.2	5.80301	4.05953	0.00437016	0.0172118	0.0101198	Gdnf/Lif/Sox9/Osr1	4
BP	GO:0106058	positive regulation of calcineurin-mediated signaling	4/997	20/28928	0.2	5.80301	4.05953	0.00437016	0.0172118	0.0101198	Nrg1/Ppp3cc/Lmcd1/Chp2	4
BP	GO:0048736	appendage development	16/997	221/28928	0.0723982	2.10064	3.10315	0.00437046	0.0172118	0.0101198	Rdh10/Errfi1/Bcl2l11/Ptch1/Fgfr1/Tbx3/Ece1/Gja1/Zbtb16/Meox2/Slc7a11/Sox9/Osr1/Cplane2/Osr2/Fermt2	16
BP	GO:0060173	limb development	16/997	221/28928	0.0723982	2.10064	3.10315	0.00437046	0.0172118	0.0101198	Rdh10/Errfi1/Bcl2l11/Ptch1/Fgfr1/Tbx3/Ece1/Gja1/Zbtb16/Meox2/Slc7a11/Sox9/Osr1/Cplane2/Osr2/Fermt2	16
BP	GO:0030850	prostate gland development	7/997	60/28928	0.116667	3.38509	3.49404	0.00445681	0.0174355	0.0102512	Ptch1/Cd44/Plaur/Id4/Prlr/Tnc/Sox9	7
BP	GO:0032413	negative regulation of ion transmembrane transporter activity	7/997	60/28928	0.116667	3.38509	3.49404	0.00445681	0.0174355	0.0102512	Gem/Kcne4/Kcne3/Gpr35/Pln/Agrn/Osr1	7
BP	GO:0141084	inflammasome-mediated signaling pathway	7/997	60/28928	0.116667	3.38509	3.49404	0.00445681	0.0174355	0.0102512	Ifi207/Nlrp1b/Atat1/Ogt/Ifi213/Mavs/Gbp2	7
BP	GO:1902930	regulation of alcohol biosynthetic process	7/997	60/28928	0.116667	3.38509	3.49404	0.00445681	0.0174355	0.0102512	Dab2/Gpr146/Ptafr/H6pd/Plek/Por/Sec14l2	7
BP	GO:0007492	endoderm development	9/997	92/28928	0.0978261	2.83843	3.33679	0.0044679	0.0174355	0.0102512	Itga5/Lama3/Dusp5/Arc/Dusp4/Dusp1/Mmp8/Tnrc6c/Gata4	9
BP	GO:0010827	regulation of D-glucose transmembrane transport	9/997	92/28928	0.0978261	2.83843	3.33679	0.0044679	0.0174355	0.0102512	Nr4a3/Stxbp4/Myc/Il1b/Crebl2/Edn1/Oga/Irs2/Fgf15	9
BP	GO:0072088	nephron epithelium morphogenesis	9/997	92/28928	0.0978261	2.83843	3.33679	0.0044679	0.0174355	0.0102512	Ptch1/Cd44/Myc/Pgf/Fgf2/Gdnf/Lif/Sox9/Osr1	9
BP	GO:1904063	negative regulation of cation transmembrane transport	9/997	92/28928	0.0978261	2.83843	3.33679	0.0044679	0.0174355	0.0102512	Gem/Kcne4/Kcne3/Gpr35/Pln/Ppp3cc/Rgs4/Agrn/Osr1	9
BP	GO:0003156	regulation of animal organ formation	5/997	32/28928	0.15625	4.5336	3.77859	0.00447178	0.0174355	0.0102512	Fgfr1/Fgf2/Gdnf/Spry1/Fgfr4	5
BP	GO:0060977	coronary vasculature morphogenesis	5/997	32/28928	0.15625	4.5336	3.77859	0.00447178	0.0174355	0.0102512	Fgfr1/Fgf2/Tgfbr3/Spred1/Gata4	5
BP	GO:0072207	metanephric epithelium development	5/997	32/28928	0.15625	4.5336	3.77859	0.00447178	0.0174355	0.0102512	Cxcr2/Yap1/Lif/Sox9/Osr1	5
BP	GO:0090280	positive regulation of calcium ion import	5/997	32/28928	0.15625	4.5336	3.77859	0.00447178	0.0174355	0.0102512	Stc1/Trpv3/Ppp3cc/Serpine1/Adrb2	5
BP	GO:1903055	positive regulation of extracellular matrix organization	5/997	32/28928	0.15625	4.5336	3.77859	0.00447178	0.0174355	0.0102512	Il6/Rgcc/Rb1/Pdpn/Sox9	5
BP	GO:2000629	negative regulation of miRNA metabolic process	5/997	32/28928	0.15625	4.5336	3.77859	0.00447178	0.0174355	0.0102512	Lilrb4b/Lilrb4a/Hif1a/Ppara/Sox9	5
BP	GO:0048145	regulation of fibroblast proliferation	11/997	127/28928	0.0866142	2.51311	3.22869	0.00454502	0.0177084	0.0104117	Sphk1/Ereg/Myc/Lig4/Myb/Btc/Pmaip1/Serpine1/Pdgfc/Lif/Prkdc	11
BP	GO:0032869	cellular response to insulin stimulus	17/997	242/28928	0.0702479	2.03825	3.06429	0.00456377	0.0177689	0.0104473	Ccl2/Stxbp4/Socs3/Inhbb/Rb1/Ptpn1/Gclc/Il1b/Ogt/Pdk4/Ndel1/Insig2/Irs2/Slc27a1/Prkdc/Myo1c/Hmga1	17
BP	GO:2001235	positive regulation of apoptotic signaling pathway	14/997	183/28928	0.0765027	2.21973	3.12726	0.00458356	0.0178333	0.0104851	Thbs1/S100a8/Tnfrsf12a/Bcl2l11/Tnfsf10/S100a9/Myc/Ripk3/Inhbb/Plscr1/Pmaip1/Ctsl/Gsdme/Osm	14
BP	GO:0032535	regulation of cellular component size	25/997	411/28928	0.0608273	1.76491	2.95075	0.00468183	0.0182027	0.0107023	Tnfrsf12a/Csf3/Sema7a/Icam1/Baiap2/Epha7/Slc12a4/Map3k13/Lrrc8a/Ccl11/Ogt/Cdc42ep3/Ssh1/Edn1/Bbs4/Ccr5/Sema6d/Plek/Cracd/Cdc42ep2/Ndel1/Bcl11a/Sin3a/Myo1c/Ifrd1	25
BP	GO:0034308	primary alcohol metabolic process	10/997	110/28928	0.0909091	2.63773	3.25135	0.00474662	0.0184199	0.01083	Rdh10/Akr1b8/Dab2/Lrat/Aldh1a3/H6pd/Ednrb/Napepld/Dgat2/Ces2a	10
BP	GO:0009132	nucleoside diphosphate metabolic process	12/997	146/28928	0.0821918	2.3848	3.16926	0.0047542	0.0184199	0.01083	Ier3/Myc/Hif1a/Pfkfb3/Ddit4/Ogt/Entpd1/Slc4a4/Ppara/Nt5e/Cmpk2/Cbfa2t3	12
BP	GO:0032606	type I interferon production	12/997	146/28928	0.0821918	2.3848	3.16926	0.0047542	0.0184199	0.01083	Havcr2/Cd14/Polr3g/Tlr3/Acod1/Sting1/Tlr8/Mavs/Tirap/Trim65/Mmp12/Traf6	12
BP	GO:0007163	establishment or maintenance of cell polarity	17/997	243/28928	0.0699588	2.02986	3.04586	0.00475432	0.0184199	0.01083	Pard6b/Abl2/Plekhg3/Spry2/Frmd4b/Cyth3/Rhoj/Foxf1/Sdccag8/Cdh5/Lmna/Dock8/Gja1/Spry1/Dst/Ndel1/Kif20b	17
BP	GO:0001783	B cell apoptotic process	6/997	46/28928	0.130435	3.78457	3.57092	0.00476794	0.0184199	0.01083	Ada/Cd44/Myc/Il10/Bcl2a1a/Irs2	6
BP	GO:0043388	positive regulation of DNA binding	6/997	46/28928	0.130435	3.78457	3.57092	0.00476794	0.0184199	0.01083	Plaur/Rb1/Irf4/Niban2/Trim6/Traf6	6
BP	GO:0090022	regulation of neutrophil chemotaxis	6/997	46/28928	0.130435	3.78457	3.57092	0.00476794	0.0184199	0.01083	Tnfaip6/Il1b/Edn1/Cxcr2/C5ar1/Tirap	6
BP	GO:0097028	dendritic cell differentiation	6/997	46/28928	0.130435	3.78457	3.57092	0.00476794	0.0184199	0.01083	Axl/Irf4/Batf2/Cebpb/Tgfbr2/Traf6	6
BP	GO:1904707	positive regulation of vascular associated smooth muscle cell proliferation	6/997	46/28928	0.130435	3.78457	3.57092	0.00476794	0.0184199	0.01083	Adamts1/Nr4a3/Fgf2/Edn1/Ldlrap1/Gja1	6
BP	GO:0009134	nucleoside diphosphate catabolic process	11/997	128/28928	0.0859375	2.49348	3.19937	0.00482165	0.0186143	0.0109443	Ier3/Myc/Hif1a/Pfkfb3/Ddit4/Ogt/Entpd1/Slc4a4/Ppara/Nt5e/Cbfa2t3	11
BP	GO:0006163	purine nucleotide metabolic process	27/997	456/28928	0.0592105	1.718	2.91979	0.00483979	0.0186712	0.0109778	Ada/Ier3/Myc/Hspa1b/Gucy1a1/Hif1a/Pfkfb3/Epha2/Ddit4/Art2b/Art2a/Ppat/Ogt/Entpd1/Adcy4/H6pd/Slc4a4/Ppara/Tspo/Nudt12/Nt5e/Oga/Gucy1b1/Nadsyn1/Cbfa2t3/Oasl2/Slc25a25	27
BP	GO:0050918	positive chemotaxis	7/997	61/28928	0.114754	3.3296	3.44113	0.00488803	0.018844	0.0110794	Ccl3/Pgf/Fgf2/Ntf3/S1pr1/Cxcl10/Ptgr1	7
BP	GO:0003205	cardiac chamber development	15/997	204/28928	0.0735294	2.13346	3.06941	0.00492888	0.0189881	0.0111641	Adamts1/Nrg1/Fhl2/Fzd2/Ccn1/Hif1a/Adamts6/Foxf1/Tbx3/Tgfbr3/Eng/Ndst1/Tgfbr2/Ube4b/Gata4	15
BP	GO:0019827	stem cell population maintenance	16/997	224/28928	0.0714286	2.0725	3.04444	0.00497125	0.0191136	0.0112379	Klf10/Myc/Lig4/Fgfr1/Trim8/Bcl7a/Tbx3/Ogt/Yap1/Zfp322a/Tead4/Med10/Lif/Sox9/Bcl9/Sin3a	16
BP	GO:0045786	negative regulation of cell cycle	25/997	413/28928	0.0605327	1.75636	2.92498	0.00497492	0.0191136	0.0112379	Ier3/Fam107a/Nr4a1/Susd2/Plk3/Zwint/Ptgs2/Rgcc/Rb1/Btg3/Ovol1/Prmt2/Dusp1/Cdc20/Ctdsp1/Tnfaip3/Donson/Nek1/Nr2f2/Dtx3l/Lif/Sde2/Tsc22d2/Osm/Prkdc	25
BP	GO:0006959	humoral immune response	21/997	327/28928	0.0642202	1.86335	2.96638	0.00497854	0.0191136	0.0112379	Ccl2/Cxcl5/Cxcl2/Ccl3/Cxcl1/S100a9/Ppl/Ccl7/Rgcc/Adm/Ccl11/Il1b/Acod1/Pf4/Cxcl3/Cxcl10/Fcgr2b/Nts/Tac1/Vip/Bcl3	21
BP	GO:0005996	monosaccharide metabolic process	20/997	306/28928	0.0653595	1.89641	2.97833	0.00498702	0.0191136	0.0112379	Sik1/Errfi1/Il6/Myc/Hif1a/Chst15/Ganc/Gclc/Ogt/Pdk4/Rorc/H6pd/Cpt1a/Pmaip1/Ppara/Slc23a2/Irs2/Igfbp3/Midn/Dgat2	20
BP	GO:0009620	response to fungus	8/997	77/28928	0.103896	3.01455	3.34425	0.00499281	0.0191136	0.0112379	Cxcl1/Cx3cr1/Clec4d/Clec4e/Clec7a/Tac1/Vip/Il17ra	8
BP	GO:0032088	negative regulation of NF-kappaB transcription factor activity	8/997	77/28928	0.103896	3.01455	3.34425	0.00499281	0.0191136	0.0112379	Nfkbia/Havcr2/Irak3/Prmt2/Tnfaip3/Acod1/Zc3h12a/Bcl3	8
BP	GO:0035904	aorta development	8/997	77/28928	0.103896	3.01455	3.34425	0.00499281	0.0191136	0.0112379	Adamts9/Ephb4/Adamts6/Egr2/Eng/Ndst1/Tgfbr2/Lox	8
BP	GO:1902807	negative regulation of cell cycle G1/S phase transition	8/997	77/28928	0.103896	3.01455	3.34425	0.00499281	0.0191136	0.0112379	Fam107a/Susd2/Plk3/Rb1/Prmt2/Ctdsp1/Sde2/Prkdc	8
BP	GO:1903317	regulation of protein maturation	8/997	77/28928	0.103896	3.01455	3.34425	0.00499281	0.0191136	0.0112379	Thbs1/Plat/Il1r2/Plaur/Ctla2a/Bag2/Serpine1/Plau	8
BP	GO:0016331	morphogenesis of embryonic epithelium	14/997	185/28928	0.0756757	2.19573	3.08255	0.00504179	0.0192876	0.0113402	Rdh10/Abl2/Ptch1/Hif1a/Sdc4/Aldh1a3/Adm/Gdnf/Sema4c/Bbs4/Sox9/Osr1/Kif20b/Traf6	14
BP	GO:0009135	purine nucleoside diphosphate metabolic process	11/997	129/28928	0.0852713	2.47415	3.17033	0.00511146	0.0195175	0.0114754	Ier3/Myc/Hif1a/Pfkfb3/Ddit4/Ogt/Entpd1/Slc4a4/Ppara/Nt5e/Cbfa2t3	11
BP	GO:0009179	purine ribonucleoside diphosphate metabolic process	11/997	129/28928	0.0852713	2.47415	3.17033	0.00511146	0.0195175	0.0114754	Ier3/Myc/Hif1a/Pfkfb3/Ddit4/Ogt/Entpd1/Slc4a4/Ppara/Nt5e/Cbfa2t3	11
BP	GO:0032768	regulation of monooxygenase activity	5/997	33/28928	0.151515	4.39622	3.68805	0.00512326	0.0195175	0.0114754	Eng/Il1a/Gdnf/Il1b/Por	5
BP	GO:0046639	negative regulation of alpha-beta T cell differentiation	5/997	33/28928	0.151515	4.39622	3.68805	0.00512326	0.0195175	0.0114754	Il4ra/Runx1/Anxa1/Pf4/Zc3h12a	5
BP	GO:0048535	lymph node development	5/997	33/28928	0.151515	4.39622	3.68805	0.00512326	0.0195175	0.0114754	Ripk3/Pdpn/Rorc/Il15/Nfkb2	5
BP	GO:0060317	cardiac epithelial to mesenchymal transition	5/997	33/28928	0.151515	4.39622	3.68805	0.00512326	0.0195175	0.0114754	Tbx3/Tgfbr3/Eng/Spry1/Tgfbr2	5
BP	GO:0033627	cell adhesion mediated by integrin	9/997	94/28928	0.0957447	2.77804	3.26218	0.00514904	0.0195885	0.0115171	Itga5/Ada/Icam1/Ccn3/Epha2/Acer2/Serpine1/Plau/Lif	9
BP	GO:0072028	nephron morphogenesis	9/997	94/28928	0.0957447	2.77804	3.26218	0.00514904	0.0195885	0.0115171	Ptch1/Cd44/Myc/Pgf/Fgf2/Gdnf/Lif/Sox9/Osr1	9
BP	GO:0017157	regulation of exocytosis	16/997	225/28928	0.0711111	2.06329	3.02508	0.00518584	0.0197148	0.0115914	Hmox1/Il4ra/D6Wsu163e/Sdc4/Prkcg/Foxf1/Anxa1/Gab2/Rabgef1/Bcr/Pld2/Cd160/Ptafr/P2ry4/Fcer1g/Cplane2	16
BP	GO:0006658	phosphatidylserine metabolic process	4/997	21/28928	0.190476	5.52668	3.92052	0.00525301	0.01986	0.0116768	Mboat1/Plscr1/Mfsd2a/Slc27a1	4
BP	GO:0021756	striatum development	4/997	21/28928	0.190476	5.52668	3.92052	0.00525301	0.01986	0.0116768	Bcl11b/Aldh1a3/Bbs4/Slc7a11	4
BP	GO:0032274	gonadotropin secretion	4/997	21/28928	0.190476	5.52668	3.92052	0.00525301	0.01986	0.0116768	Inhbb/Tbx3/Niban2/Gja1	4
BP	GO:0032495	response to muramyl dipeptide	4/997	21/28928	0.190476	5.52668	3.92052	0.00525301	0.01986	0.0116768	Nfkbia/Vim/Tnfaip3/Inava	4
BP	GO:0032674	regulation of interleukin-5 production	4/997	21/28928	0.190476	5.52668	3.92052	0.00525301	0.01986	0.0116768	Lilrb4b/Lilrb4a/Il1rl1/Il17ra	4
BP	GO:0035457	cellular response to interferon-alpha	4/997	21/28928	0.190476	5.52668	3.92052	0.00525301	0.01986	0.0116768	Myc/Axl/Ifit1/Ifi204	4
BP	GO:0043117	positive regulation of vascular permeability	4/997	21/28928	0.190476	5.52668	3.92052	0.00525301	0.01986	0.0116768	Tacr1/Tjp2/Cxcr2/Ptp4a3	4
BP	GO:0060340	positive regulation of type I interferon-mediated signaling pathway	4/997	21/28928	0.190476	5.52668	3.92052	0.00525301	0.01986	0.0116768	Sting1/Mavs/Trim6/Mmp12	4
BP	GO:0051302	regulation of cell division	14/997	186/28928	0.0752688	2.18393	3.06041	0.00528437	0.0199648	0.0117384	Ptch1/Ereg/Myc/Pgf/Fgf2/Susd2/Plk3/Il1a/Il1b/Btc/Bbs4/Sfn/Pdgfc/Kif20b	14
BP	GO:0050852	T cell receptor signaling pathway	12/997	148/28928	0.0810811	2.35257	3.11675	0.00529541	0.019979	0.0117467	Lilrb4b/Lilrb4a/Pde4b/Ctla4/Ada/Shb/Cd160/Cblb/Bcl2a1d/Icosl/Zc3h12a/Traf6	12
BP	GO:0051100	negative regulation of binding	12/997	148/28928	0.0810811	2.35257	3.11675	0.00529541	0.019979	0.0117467	Dab2/Ifi207/Myc/Il10/Pln/Plscr1/Bag2/Mdfi/Mitd1/Ifi213/Sp100/Id1	12
BP	GO:0045622	regulation of T-helper cell differentiation	6/997	47/28928	0.12766	3.70405	3.5052	0.0053095	0.0200183	0.0117698	Il4ra/Il6/Anxa1/Shb/Pf4/Zc3h12a	6
BP	GO:0072175	epithelial tube formation	13/997	167/28928	0.0778443	2.25866	3.08191	0.00534114	0.0201238	0.0118319	Abl2/Ptch1/Hif1a/Fgf2/Sdc4/Adm/Gdnf/Sema4c/Bbs4/Sox9/Osr1/Kif20b/Traf6	13
BP	GO:2001222	regulation of neuron migration	7/997	62/28928	0.112903	3.27589	3.3893	0.00534989	0.0201429	0.0118431	Nrg1/Sema6a/Il1r1/Rapgef2/Adgrg1/Flrt2/Kif20b	7
BP	GO:0007612	learning	15/997	206/28928	0.0728155	2.11275	3.02816	0.00538665	0.0202674	0.0119163	Abl2/Fosl1/Arc/Hif1a/Ptgs1/Ptgs2/Rin1/Pln/Tacr1/Meis2/Atp8a1/Slc7a11/Adrb2/Nts/Tac1	15
BP	GO:0010658	striated muscle cell apoptotic process	8/997	78/28928	0.102564	2.9759	3.30138	0.00539942	0.0202737	0.01192	Nrg1/Ptpn1/Trem1/Capn2/Cxcr2/Bag3/Igfbp3/Gata4	8
BP	GO:0032092	positive regulation of protein binding	8/997	78/28928	0.102564	2.9759	3.30138	0.00539942	0.0202737	0.01192	Abl2/Ip6k2/Rapgef2/Agrn/Sting1/Fam220a/Dtx3l/Mavs	8
BP	GO:1902373	negative regulation of mRNA catabolic process	8/997	78/28928	0.102564	2.9759	3.30138	0.00539942	0.0202737	0.01192	Axin2/Gdnf/Arid5a/A1cf/Slc11a1/Cirbp/Tirap/Vip	8
BP	GO:0002676	regulation of chronic inflammatory response	3/997	11/28928	0.272727	7.91319	4.33266	0.00547263	0.0203949	0.0119913	Il10/Cx3cr1/Tnfaip3	3
BP	GO:0010739	positive regulation of protein kinase A signaling	3/997	11/28928	0.272727	7.91319	4.33266	0.00547263	0.0203949	0.0119913	Akap12/Ramp3/Adrb2	3
BP	GO:0010922	positive regulation of phosphatase activity	3/997	11/28928	0.272727	7.91319	4.33266	0.00547263	0.0203949	0.0119913	Ripk3/Plek/Chp2	3
BP	GO:0033034	positive regulation of myeloid cell apoptotic process	3/997	11/28928	0.272727	7.91319	4.33266	0.00547263	0.0203949	0.0119913	Cd44/Hcar2/Anxa1	3
BP	GO:0034115	negative regulation of heterotypic cell-cell adhesion	3/997	11/28928	0.272727	7.91319	4.33266	0.00547263	0.0203949	0.0119913	Il10/Il1rn/Tnfaip3	3
BP	GO:0034635	glutathione transport	3/997	11/28928	0.272727	7.91319	4.33266	0.00547263	0.0203949	0.0119913	Abcc1/Gja1/Slc7a11	3
BP	GO:0038060	nitric oxide-cGMP-mediated signaling	3/997	11/28928	0.272727	7.91319	4.33266	0.00547263	0.0203949	0.0119913	Thbs1/Gucy1a1/Gucy1b1	3
BP	GO:0038130	ERBB4 signaling pathway	3/997	11/28928	0.272727	7.91319	4.33266	0.00547263	0.0203949	0.0119913	Nrg1/Ereg/Btc	3
BP	GO:0060405	regulation of penile erection	3/997	11/28928	0.272727	7.91319	4.33266	0.00547263	0.0203949	0.0119913	Ada/Ednrb/Vip	3
BP	GO:0070587	regulation of cell-cell adhesion involved in gastrulation	3/997	11/28928	0.272727	7.91319	4.33266	0.00547263	0.0203949	0.0119913	Il10/Il1rn/Tnfaip3	3
BP	GO:0110075	regulation of ferroptosis	3/997	11/28928	0.272727	7.91319	4.33266	0.00547263	0.0203949	0.0119913	Hmox1/Sqstm1/Slc7a11	3
BP	GO:0072332	intrinsic apoptotic signaling pathway by p53 class mediator	9/997	95/28928	0.0947368	2.74879	3.22561	0.00551843	0.0205517	0.0120834	Ifi207/Cd44/Myc/Ddit4/Bdkrb2/Pmaip1/Ifi213/Bcl3/Ifi204	9
BP	GO:0051592	response to calcium ion	12/997	149/28928	0.0805369	2.33678	3.09081	0.00558381	0.0207669	0.01221	Fosb/Thbs1/Clic4/Junb/Inhbb/Cpne8/S100a16/Itpkb/Itpkc/Edn1/Jund/Chp2	12
BP	GO:1901875	positive regulation of post-translational protein modification	12/997	149/28928	0.0805369	2.33678	3.09081	0.00558381	0.0207669	0.01221	Sphk1/Trib1/Egr1/Fam107a/Dcun1d2/Skp2/Cdc20/Rasd2/Cblb/Inava/Arrdc3/Zc3h12a	12
BP	GO:0060993	kidney morphogenesis	10/997	113/28928	0.0884956	2.5677	3.15464	0.00573428	0.0212977	0.012522	Ptch1/Cd44/Myc/Pgf/Fgf2/Gdnf/Gcnt1/Lif/Sox9/Osr1	10
BP	GO:0072080	nephron tubule development	10/997	113/28928	0.0884956	2.5677	3.15464	0.00573428	0.0212977	0.012522	Ptch1/Cd44/Myc/Pgf/Fgf2/Gdnf/Yap1/Lif/Sox9/Osr1	10
BP	GO:0006006	glucose metabolic process	17/997	248/28928	0.0685484	1.98893	2.95502	0.00580723	0.021554	0.0126727	Sik1/Errfi1/Il6/Myc/Hif1a/Ganc/Ogt/Pdk4/Rorc/H6pd/Cpt1a/Pmaip1/Ppara/Irs2/Igfbp3/Midn/Dgat2	17
BP	GO:0014887	cardiac muscle adaptation	5/997	34/28928	0.147059	4.26692	3.60106	0.00583914	0.0216016	0.0127007	Errfi1/Lmna/Oga/Camta2/Gata4	5
BP	GO:0033198	response to ATP	5/997	34/28928	0.147059	4.26692	3.60106	0.00583914	0.0216016	0.0127007	Ccl2/Ptgs2/Il1b/Ssh1/Nt5e	5
BP	GO:0034121	regulation of toll-like receptor signaling pathway	5/997	34/28928	0.147059	4.26692	3.60106	0.00583914	0.0216016	0.0127007	S100a8/S100a9/Irak3/Irf4/Mfhas1	5
BP	GO:0060384	innervation	5/997	34/28928	0.147059	4.26692	3.60106	0.00583914	0.0216016	0.0127007	Epha4/Prkcg/Ece1/Slitrk6/Edn1	5
BP	GO:0043370	regulation of CD4-positive, alpha-beta T cell differentiation	7/997	63/28928	0.111111	3.22389	3.33852	0.0058437	0.0216016	0.0127007	Il4ra/Il6/Runx1/Anxa1/Shb/Pf4/Zc3h12a	7
BP	GO:0071300	cellular response to retinoic acid	7/997	63/28928	0.111111	3.22389	3.33852	0.0058437	0.0216016	0.0127007	Ccl2/Abl2/Yap1/Tnc/Sox9/Osr1/Gjb3	7
BP	GO:0046660	female sex differentiation	13/997	169/28928	0.0769231	2.23193	3.03457	0.00589336	0.021717	0.0127686	Adamts1/Tnfaip6/Ereg/Schip1/Inhbb/Runx1/Tbx3/Axl/Tiparp/Cebpb/Nr2f2/Serpine1/Mertk	13
BP	GO:2000058	regulation of ubiquitin-dependent protein catabolic process	13/997	169/28928	0.0769231	2.23193	3.03457	0.00589336	0.021717	0.0127686	Trib1/Dab2/Csnk1e/Hspa1b/Hspa1a/Axin2/Plk3/Plk2/Gclc/Ogt/Cdc20/Cbfa2t3/Herpud1	13
BP	GO:0001937	negative regulation of endothelial cell proliferation	6/997	48/28928	0.125	3.62688	3.44127	0.00589473	0.021717	0.0127686	Thbs1/Rgcc/Eng/Flt1/Gja1/Nr2f2	6
BP	GO:0001990	regulation of systemic arterial blood pressure by hormone	6/997	48/28928	0.125	3.62688	3.44127	0.00589473	0.021717	0.0127686	Ece1/F2r/Tacr1/Avpr1a/Edn1/Ednrb	6
BP	GO:0045066	regulatory T cell differentiation	6/997	48/28928	0.125	3.62688	3.44127	0.00589473	0.021717	0.0127686	Lilrb4b/Lilrb4a/Hspb1/Ctla4/Cd44/Ctla2a	6
BP	GO:0014855	striated muscle cell proliferation	9/997	96/28928	0.09375	2.72016	3.1895	0.00590797	0.0217512	0.0127887	Nrg1/Fgfr1/Fgf2/Tgfbr3/Gja1/Tgfbr2/Yap1/Pim1/Gata4	9
BP	GO:0009755	hormone-mediated signaling pathway	15/997	209/28928	0.0717703	2.08242	2.96715	0.00613716	0.0225798	0.0132759	Errfi1/Dab2/Aldh1a3/Nr5a2/Per1/Prmt2/Lmo3/Skp2/Klf9/Prlr/Ppara/Pim1/Cry2/Abhd2/Slc27a1	15
BP	GO:0009154	purine ribonucleotide catabolic process	12/997	151/28928	0.0794702	2.30583	3.03955	0.00619795	0.0227882	0.0133984	Ada/Ier3/Myc/Hif1a/Pfkfb3/Ddit4/Ogt/Entpd1/Slc4a4/Ppara/Nt5e/Cbfa2t3	12
BP	GO:0002524	hypersensitivity	4/997	22/28928	0.181818	5.27546	3.79015	0.00624763	0.0228483	0.0134337	Il20rb/Fcgr3/Fcgr2b/Fcer1g	4
BP	GO:0006857	oligopeptide transport	4/997	22/28928	0.181818	5.27546	3.79015	0.00624763	0.0228483	0.0134337	Abcc1/Gja1/Slc15a3/Slc7a11	4
BP	GO:0009158	ribonucleoside monophosphate catabolic process	4/997	22/28928	0.181818	5.27546	3.79015	0.00624763	0.0228483	0.0134337	Ada/Dpyd/Nt5e/Cda	4
BP	GO:0032634	interleukin-5 production	4/997	22/28928	0.181818	5.27546	3.79015	0.00624763	0.0228483	0.0134337	Lilrb4b/Lilrb4a/Il1rl1/Il17ra	4
BP	GO:0048245	eosinophil chemotaxis	4/997	22/28928	0.181818	5.27546	3.79015	0.00624763	0.0228483	0.0134337	Ccl2/Ccl3/Ccl7/Ccl11	4
BP	GO:0061760	antifungal innate immune response	4/997	22/28928	0.181818	5.27546	3.79015	0.00624763	0.0228483	0.0134337	Cx3cr1/Clec4d/Clec4e/Clec7a	4
BP	GO:0099151	regulation of postsynaptic density assembly	4/997	22/28928	0.181818	5.27546	3.79015	0.00624763	0.0228483	0.0134337	Lrfn4/Fgfr1/Ptprd/Abi3bp	4
BP	GO:2001026	regulation of endothelial cell chemotaxis	4/997	22/28928	0.181818	5.27546	3.79015	0.00624763	0.0228483	0.0134337	Thbs1/Hspb1/Fgfr1/Fgf2	4
BP	GO:0006865	amino acid transport	14/997	190/28928	0.0736842	2.13795	2.97323	0.00635032	0.0231928	0.0136363	Myc/Il1rn/Slc7a1/Kcnk1/Gfap/Lrrc8a/Avpr1a/Il1b/Rgs4/Gja1/Slc11a1/Slc7a5/Slc7a11/Slc38a9	14
BP	GO:0050851	antigen receptor-mediated signaling pathway	14/997	190/28928	0.0736842	2.13795	2.97323	0.00635032	0.0231928	0.0136363	Lilrb4b/Lilrb4a/Pde4b/Ctla4/Ada/Nfkbia/Blnk/Shb/Cd160/Cblb/Bcl2a1d/Icosl/Zc3h12a/Traf6	14
BP	GO:0046850	regulation of bone remodeling	7/997	64/28928	0.109375	3.17352	3.28875	0.00637077	0.0232197	0.0136521	Il6/Adam8/Tnfrsf11b/Pdk4/Gja1/S1pr1/Tmem119	7
BP	GO:0060324	face development	7/997	64/28928	0.109375	3.17352	3.28875	0.00637077	0.0232197	0.0136521	Csrnp1/Crispld2/Schip1/Aldh1a3/Tiparp/Bbs4/Zfand5	7
BP	GO:0016311	dephosphorylation	16/997	230/28928	0.0695652	2.01844	2.92974	0.00637462	0.0232197	0.0136521	Ppm1k/Dusp5/Ripk3/Dusp4/Pdp1/Ptpn1/Dusp1/Ppp3cc/Ptprr/Ptprd/Ssh1/Ctdsp1/Plek/Fam220a/Chp2/Ptp4a3	16
BP	GO:1905475	regulation of protein localization to membrane	16/997	230/28928	0.0695652	2.01844	2.92974	0.00637462	0.0232197	0.0136521	Tnfaip6/Ccl2/Dab2/Epha2/Ramp3/Slc5a3/Sqstm1/Ogt/Ssh1/Agrn/Ldlrap1/Sfn/Slc7a11/Pdzk1/Myo1c/Traf6	16
BP	GO:0032231	regulation of actin filament bundle assembly	10/997	115/28928	0.0869565	2.52305	3.09189	0.00647704	0.0235615	0.013853	Sh3pxd2b/Sdc4/Rgcc/Tacr1/Bbs4/Plek/S1pr1/Tac1/Id1/Fermt2	10
BP	GO:0043502	regulation of muscle adaptation	10/997	115/28928	0.0869565	2.52305	3.09189	0.00647704	0.0235615	0.013853	Nr4a3/Errfi1/Tnfrsf1b/Ece1/Lmna/Rgs4/Lmcd1/Edn1/Ppara/Oga	10
BP	GO:0030195	negative regulation of blood coagulation	6/997	49/28928	0.122449	3.55286	3.37902	0.0065256	0.0237067	0.0139384	Thbs1/Plat/Plaur/Thbd/Serpine1/Plau	6
BP	GO:2000516	positive regulation of CD4-positive, alpha-beta T cell activation	6/997	49/28928	0.122449	3.55286	3.37902	0.0065256	0.0237067	0.0139384	Il4ra/Il6/Anxa1/Shb/Cd160/Tgfbr2	6
BP	GO:0099173	postsynapse organization	20/997	314/28928	0.0636943	1.84809	2.85479	0.00658498	0.0239065	0.0140559	Abl2/Lrfn4/Baiap2/Epha4/Fam107a/Arc/Fgfr1/Epha7/Gdnf/Ptpn1/Ptprd/Ssh1/Sema4c/Agrn/Flrt2/Fcgr2b/Dgkb/Slc7a11/Abi3bp/Lrp8	20
BP	GO:0001975	response to amphetamine	5/997	35/28928	0.142857	4.14501	3.51735	0.00662262	0.0239796	0.0140989	Fosb/Cxcl2/Nr4a1/Nr4a2/Edn1	5
BP	GO:0040036	regulation of fibroblast growth factor receptor signaling pathway	5/997	35/28928	0.142857	4.14501	3.51735	0.00662262	0.0239796	0.0140989	Thbs1/Spry2/Spry4/Spry3/Spry1	5
BP	GO:0061036	positive regulation of cartilage development	5/997	35/28928	0.142857	4.14501	3.51735	0.00662262	0.0239796	0.0140989	Ccn1/Sox6/Por/Zbtb16/Sox9	5
BP	GO:0150077	regulation of neuroinflammatory response	5/997	35/28928	0.142857	4.14501	3.51735	0.00662262	0.0239796	0.0140989	Sphk1/Tnfrsf1b/Ptgs2/Cd200l1/Mmp8	5
BP	GO:0019362	pyridine nucleotide metabolic process	14/997	191/28928	0.0732984	2.12676	2.95177	0.006642	0.0240181	0.0141215	Ier3/Myc/Hif1a/Pfkfb3/Ddit4/Art2b/Art2a/Ogt/H6pd/Slc4a4/Ppara/Nudt12/Nadsyn1/Cbfa2t3	14
BP	GO:0046496	nicotinamide nucleotide metabolic process	14/997	191/28928	0.0732984	2.12676	2.95177	0.006642	0.0240181	0.0141215	Ier3/Myc/Hif1a/Pfkfb3/Ddit4/Art2b/Art2a/Ogt/H6pd/Slc4a4/Ppara/Nudt12/Nadsyn1/Cbfa2t3	14
BP	GO:0030307	positive regulation of cell growth	15/997	211/28928	0.07109	2.06268	2.92705	0.00668266	0.0241492	0.0141986	Tnfrsf12a/Sphk1/Nrg1/Sema7a/Map3k13/Avpr1a/Cxcl16/Edn1/Sfn/Yap1/Acsl4/Slc23a2/Ndel1/Mfsd2a/Bcl11a	15
BP	GO:0006766	vitamin metabolic process	9/997	98/28928	0.0918367	2.66465	3.11867	0.00675031	0.0243616	0.0143235	Rdh10/Fgfr1/Lrat/Cyp2r1/Gclc/Fgfr4/Slc23a2/Npc1l1/Isx	9
BP	GO:0034766	negative regulation of monoatomic ion transmembrane transport	9/997	98/28928	0.0918367	2.66465	3.11867	0.00675031	0.0243616	0.0143235	Gem/Kcne4/Kcne3/Gpr35/Pln/Ppp3cc/Rgs4/Agrn/Osr1	9
BP	GO:0072171	mesonephric tubule morphogenesis	8/997	81/28928	0.0987654	2.86568	3.17677	0.00677165	0.0244225	0.0143593	Ptch1/Cd44/Myc/Pgf/Fgf2/Gdnf/Sox9/Osr1	8
BP	GO:0098727	maintenance of cell number	16/997	232/28928	0.0689655	2.00104	2.89228	0.00690776	0.024897	0.0146383	Klf10/Myc/Lig4/Fgfr1/Trim8/Bcl7a/Tbx3/Ogt/Yap1/Zfp322a/Tead4/Med10/Lif/Sox9/Bcl9/Sin3a	16
BP	GO:0039532	negative regulation of cytoplasmic pattern recognition receptor signaling pathway	7/997	65/28928	0.107692	3.1247	3.23996	0.00693241	0.0249367	0.0146616	Ifi207/Rnf170/Ogt/Rab7b/Tnfaip3/Ifi213/Prkdc	7
BP	GO:0048260	positive regulation of receptor-mediated endocytosis	7/997	65/28928	0.107692	3.1247	3.23996	0.00693241	0.0249367	0.0146616	Dab2/Sele/Ntf3/Plk2/Pld2/Ldlrap1/Serpine1	7
BP	GO:1902808	positive regulation of cell cycle G1/S phase transition	7/997	65/28928	0.107692	3.1247	3.23996	0.00693241	0.0249367	0.0146616	Adamts1/Stxbp4/Cenpj/Anxa1/Rgcc/Ccne2/Lsm10	7
BP	GO:0001794	type IIa hypersensitivity	3/997	12/28928	0.25	7.25376	4.09373	0.00711144	0.0252493	0.0148454	Fcgr3/Fcgr2b/Fcer1g	3
BP	GO:0002118	aggressive behavior	3/997	12/28928	0.25	7.25376	4.09373	0.00711144	0.0252493	0.0148454	Abl2/Tacr1/Avpr1a	3
BP	GO:0002445	type II hypersensitivity	3/997	12/28928	0.25	7.25376	4.09373	0.00711144	0.0252493	0.0148454	Fcgr3/Fcgr2b/Fcer1g	3
BP	GO:0002855	regulation of natural killer cell mediated immune response to tumor cell	3/997	12/28928	0.25	7.25376	4.09373	0.00711144	0.0252493	0.0148454	Havcr2/Pvr/Cd160	3
BP	GO:0010612	regulation of cardiac muscle adaptation	3/997	12/28928	0.25	7.25376	4.09373	0.00711144	0.0252493	0.0148454	Errfi1/Lmna/Oga	3
BP	GO:0032825	positive regulation of natural killer cell differentiation	3/997	12/28928	0.25	7.25376	4.09373	0.00711144	0.0252493	0.0148454	Axl/Il15/Rasgrp1	3
BP	GO:0033089	positive regulation of T cell differentiation in thymus	3/997	12/28928	0.25	7.25376	4.09373	0.00711144	0.0252493	0.0148454	Ada/Adam8/Rasgrp1	3
BP	GO:0034135	regulation of toll-like receptor 2 signaling pathway	3/997	12/28928	0.25	7.25376	4.09373	0.00711144	0.0252493	0.0148454	Mfhas1/Acod1/Tirap	3
BP	GO:0035970	peptidyl-threonine dephosphorylation	3/997	12/28928	0.25	7.25376	4.09373	0.00711144	0.0252493	0.0148454	Dusp5/Pdp1/Dusp1	3
BP	GO:0043084	penile erection	3/997	12/28928	0.25	7.25376	4.09373	0.00711144	0.0252493	0.0148454	Ada/Ednrb/Vip	3
BP	GO:0060020	Bergmann glial cell differentiation	3/997	12/28928	0.25	7.25376	4.09373	0.00711144	0.0252493	0.0148454	Abl2/Vim/Gfap	3
BP	GO:0060049	regulation of protein glycosylation	3/997	12/28928	0.25	7.25376	4.09373	0.00711144	0.0252493	0.0148454	Il15/Acer2/Oga	3
BP	GO:0061684	chaperone-mediated autophagy	3/997	12/28928	0.25	7.25376	4.09373	0.00711144	0.0252493	0.0148454	Plk3/Gfap/Bag3	3
BP	GO:0070424	regulation of nucleotide-binding domain, leucine rich repeat containing receptor signaling pathway	3/997	12/28928	0.25	7.25376	4.09373	0.00711144	0.0252493	0.0148454	Hspa1b/Tnfaip3/Slc15a3	3
BP	GO:0070586	cell-cell adhesion involved in gastrulation	3/997	12/28928	0.25	7.25376	4.09373	0.00711144	0.0252493	0.0148454	Il10/Il1rn/Tnfaip3	3
BP	GO:0071612	IP-10 production	3/997	12/28928	0.25	7.25376	4.09373	0.00711144	0.0252493	0.0148454	Lilrb4b/Lilrb4a/Mavs	3
BP	GO:0071658	regulation of IP-10 production	3/997	12/28928	0.25	7.25376	4.09373	0.00711144	0.0252493	0.0148454	Lilrb4b/Lilrb4a/Mavs	3
BP	GO:0071888	macrophage apoptotic process	3/997	12/28928	0.25	7.25376	4.09373	0.00711144	0.0252493	0.0148454	Plekho2/Ccr5/St6gal1	3
BP	GO:1904238	pericyte cell differentiation	3/997	12/28928	0.25	7.25376	4.09373	0.00711144	0.0252493	0.0148454	Gpr4/Epha2/Osr1	3
BP	GO:2000322	regulation of glucocorticoid receptor signaling pathway	3/997	12/28928	0.25	7.25376	4.09373	0.00711144	0.0252493	0.0148454	Per1/Lmo3/Cry2	3
BP	GO:0051961	negative regulation of nervous system development	13/997	173/28928	0.0751445	2.18032	2.94186	0.00713404	0.0253132	0.0148829	Epha7/Id4/Rb1/Rapgef2/Ccl11/Il1b/Ctdsp1/Ccr5/Sema6d/Tspo/Bcl11a/Id1/Ifrd1	13
BP	GO:0021761	limbic system development	11/997	135/28928	0.0814815	2.36419	3.00161	0.00715117	0.0253575	0.014909	Nr4a3/Fgfr1/Sema6b/Tbx3/Aldh1a3/Id4/Atat1/Bbs4/Anxa3/Mfsd2a/Lrp8	11
BP	GO:0006040	amino sugar metabolic process	6/997	50/28928	0.12	3.48181	3.31837	0.00720406	0.0254463	0.0149612	Gfpt2/Mgat3/Cmah/Ogt/Oga/St6gal1	6
BP	GO:0006509	membrane protein ectodomain proteolysis	6/997	50/28928	0.12	3.48181	3.31837	0.00720406	0.0254463	0.0149612	Tnfrsf1b/Il10/Adam8/Timp3/Il1b/Timp1	6
BP	GO:0085029	extracellular matrix assembly	6/997	50/28928	0.12	3.48181	3.31837	0.00720406	0.0254463	0.0149612	Rgcc/Tgfbr3/Has1/Qsox1/Sox9/Lox	6
BP	GO:1900047	negative regulation of hemostasis	6/997	50/28928	0.12	3.48181	3.31837	0.00720406	0.0254463	0.0149612	Thbs1/Plat/Plaur/Thbd/Serpine1/Plau	6
BP	GO:1900087	positive regulation of G1/S transition of mitotic cell cycle	6/997	50/28928	0.12	3.48181	3.31837	0.00720406	0.0254463	0.0149612	Adamts1/Cenpj/Anxa1/Rgcc/Ccne2/Lsm10	6
BP	GO:1902459	positive regulation of stem cell population maintenance	6/997	50/28928	0.12	3.48181	3.31837	0.00720406	0.0254463	0.0149612	Bcl7a/Ogt/Yap1/Zfp322a/Tead4/Sin3a	6
BP	GO:0001838	embryonic epithelial tube formation	12/997	154/28928	0.0779221	2.26091	2.96416	0.00721799	0.0254627	0.0149709	Abl2/Ptch1/Hif1a/Sdc4/Adm/Gdnf/Sema4c/Bbs4/Sox9/Osr1/Kif20b/Traf6	12
BP	GO:0048144	fibroblast proliferation	12/997	154/28928	0.0779221	2.26091	2.96416	0.00721799	0.0254627	0.0149709	Sphk1/Ereg/Myc/Lig4/Myb/Btc/Pmaip1/Serpine1/Meox2/Pdgfc/Lif/Prkdc	12
BP	GO:0021543	pallium development	15/997	213/28928	0.0704225	2.04331	2.88739	0.00726636	0.0256169	0.0150615	Nr4a3/Fgfr1/Hif1a/Tubb2a/Sema6b/Slc2a1/Id4/Tubb2b/Atat1/Adgrg1/Bbs4/Anxa3/Ndel1/Mfsd2a/Lrp8	15
BP	GO:0031638	zymogen activation	8/997	82/28928	0.097561	2.83074	3.1365	0.00728301	0.0256426	0.0150766	Thbs1/Plat/Ifi207/Plaur/Ctsl/Ifi213/Serpine1/Plau	8
BP	GO:0045453	bone resorption	8/997	82/28928	0.097561	2.83074	3.1365	0.00728301	0.0256426	0.0150766	Il6/Adam8/Tnfrsf11b/Pdk4/S1pr1/Tmem119/Adrb2/Traf6	8
BP	GO:0046718	symbiont entry into host cell	10/997	117/28928	0.0854701	2.47992	3.03045	0.00729239	0.0256591	0.0150864	Ch25h/Trim30d/Trim8/Slc7a1/Ifitm1/Axl/Trim12c/Ifitm6/Trim34b/Trim6	10
BP	GO:0009749	response to glucose	17/997	254/28928	0.0669291	1.94195	2.84877	0.00731303	0.0256895	0.0151042	Thbs1/Ccl2/Stxbp4/Icam1/Egr1/Klf7/Hif1a/Glul/Gclc/Pim3/Ogt/Gja1/Ctsl/Acvr1c/Irs2/Sin3a/Hmga1	17
BP	GO:0002043	blood vessel endothelial cell proliferation involved in sprouting angiogenesis	4/997	23/28928	0.173913	5.04609	3.66749	0.00735974	0.0256895	0.0151042	Thbs1/Hmox1/Nrarp/Epha2	4
BP	GO:0009164	nucleoside catabolic process	4/997	23/28928	0.173913	5.04609	3.66749	0.00735974	0.0256895	0.0151042	Ada/Dpyd/Dctd/Cda	4
BP	GO:0030812	negative regulation of nucleotide catabolic process	4/997	23/28928	0.173913	5.04609	3.66749	0.00735974	0.0256895	0.0151042	Ier3/Ddit4/Ppara/Cbfa2t3	4
BP	GO:0032332	positive regulation of chondrocyte differentiation	4/997	23/28928	0.173913	5.04609	3.66749	0.00735974	0.0256895	0.0151042	Sox6/Por/Zbtb16/Sox9	4
BP	GO:0033122	negative regulation of purine nucleotide catabolic process	4/997	23/28928	0.173913	5.04609	3.66749	0.00735974	0.0256895	0.0151042	Ier3/Ddit4/Ppara/Cbfa2t3	4
BP	GO:0045652	regulation of megakaryocyte differentiation	4/997	23/28928	0.173913	5.04609	3.66749	0.00735974	0.0256895	0.0151042	Myb/Rab7b/Pf4/Lox	4
BP	GO:0045820	negative regulation of glycolytic process	4/997	23/28928	0.173913	5.04609	3.66749	0.00735974	0.0256895	0.0151042	Ier3/Ddit4/Ppara/Cbfa2t3	4
BP	GO:0070230	positive regulation of lymphocyte apoptotic process	4/997	23/28928	0.173913	5.04609	3.66749	0.00735974	0.0256895	0.0151042	Bcl2l11/Myc/Il10/Adam8	4
BP	GO:0071880	adenylate cyclase-activating adrenergic receptor signaling pathway	4/997	23/28928	0.173913	5.04609	3.66749	0.00735974	0.0256895	0.0151042	Pln/Rapgef2/Arrdc3/Adrb2	4
BP	GO:0072111	cell proliferation involved in kidney development	4/997	23/28928	0.173913	5.04609	3.66749	0.00735974	0.0256895	0.0151042	Ptch1/Egr1/Myc/Osr1	4
BP	GO:0072234	metanephric nephron tubule development	4/997	23/28928	0.173913	5.04609	3.66749	0.00735974	0.0256895	0.0151042	Yap1/Lif/Sox9/Osr1	4
BP	GO:0090092	regulation of transmembrane receptor protein serine/threonine kinase signaling pathway	18/997	275/28928	0.0654545	1.89917	2.83059	0.00736195	0.0256895	0.0151042	Thbs1/Tnfaip6/Dab2/Spry2/Ccn1/Ccn3/Cdh5/Tgfbr3/Eng/Pmepa1/Ogt/Spry1/Spred1/Tgfbr2/Ppara/Lox/Gata4/Sin3a	18
BP	GO:0002063	chondrocyte development	5/997	36/28928	0.138889	4.02987	3.4367	0.00747682	0.0260406	0.0153106	Mex3c/Axin2/Tgfbr2/Sox9/Ecm1	5
BP	GO:0033280	response to vitamin D	5/997	36/28928	0.138889	4.02987	3.4367	0.00747682	0.0260406	0.0153106	Stc1/Ptgs2/Stc2/Pim1/Tnc	5
BP	GO:0043267	negative regulation of potassium ion transport	5/997	36/28928	0.138889	4.02987	3.4367	0.00747682	0.0260406	0.0153106	Kcne4/Kcne3/Rgs4/Agrn/Vip	5
BP	GO:0070588	calcium ion transmembrane transport	22/997	361/28928	0.0609418	1.76823	2.77504	0.00748802	0.0260631	0.0153239	Gem/Ccl3/Fgf2/Trpv3/Bdkrb1/Gpr35/Pln/F2r/Ppp3cc/Xcr1/Bhlha15/Edn1/Plch1/Ccr5/Orai3/Itpr2/Cxcl10/Oga/Ednrb/Hspa2/Adrb2/Slc25a25	22
BP	GO:0009259	ribonucleotide metabolic process	23/997	383/28928	0.0600522	1.74242	2.76337	0.00752234	0.0261095	0.0153512	Ada/Ier3/Myc/Hspa1b/Gucy1a1/Hif1a/Pfkfb3/Epha2/Ddit4/Ctps1/Dpyd/Ppat/Ogt/Entpd1/Adcy4/Slc4a4/Ppara/Tspo/Nt5e/Gucy1b1/Cbfa2t3/Cda/Slc25a25	23
BP	GO:0001947	heart looping	7/997	66/28928	0.106061	3.07735	3.19209	0.00752995	0.0261095	0.0153512	Hif1a/Tbx3/Asb2/Eng/Gja1/Tgfbr2/Gata4	7
BP	GO:0030225	macrophage differentiation	7/997	66/28928	0.106061	3.07735	3.19209	0.00752995	0.0261095	0.0153512	Trib1/Csf1/Rb1/Il34/Il15/Lif/Il1rl1	7
BP	GO:0042058	regulation of epidermal growth factor receptor signaling pathway	7/997	66/28928	0.106061	3.07735	3.19209	0.00752995	0.0261095	0.0153512	Errfi1/Spry2/Plaur/Fam83b/Rhbdf1/Gprc5a/Cblb	7
BP	GO:0043506	regulation of JUN kinase activity	7/997	66/28928	0.106061	3.07735	3.19209	0.00752995	0.0261095	0.0153512	Epha4/Map3k13/Ptpn1/Edn1/Fgd4/Tirap/Traf6	7
BP	GO:0060688	regulation of morphogenesis of a branching structure	7/997	66/28928	0.106061	3.07735	3.19209	0.00752995	0.0261095	0.0153512	Fgfr1/Pgf/Map3k13/Gdnf/Il1b/Bcl11a/Sox9	7
BP	GO:0034764	positive regulation of transmembrane transport	17/997	255/28928	0.0666667	1.93434	2.83135	0.0075921	0.0263084	0.0154681	Ccl2/Nr4a3/Lcn2/Arc/Bdkrb1/F2r/Ppp3cc/Crebl2/Edn1/Cxcl10/Oga/Irs2/Slc7a5/Hspa2/Adrb2/Gal/Fgf15	17
BP	GO:0090398	cellular senescence	9/997	100/28928	0.09	2.61135	3.04958	0.00768177	0.0266023	0.0156409	Tbx3/Hmga1b/Plk2/Pot1b/Lmna/Zkscan3/Zfp217/Prkdc/Hmga1	9
BP	GO:0030038	contractile actin filament bundle assembly	10/997	118/28928	0.0847458	2.4589	3.00021	0.0077287	0.0267142	0.0157067	Sh3pxd2b/Zyx/Sdc4/Rgcc/Tacr1/Fhdc1/Bbs4/S1pr1/Tac1/Fermt2	10
BP	GO:0035282	segmentation	10/997	118/28928	0.0847458	2.4589	3.00021	0.0077287	0.0267142	0.0157067	Nrarp/Foxf1/Tbx3/Axin2/Ifitm1/Egr2/Tasor/Meox2/Osr1/Prkdc	10
BP	GO:0043149	stress fiber assembly	10/997	118/28928	0.0847458	2.4589	3.00021	0.0077287	0.0267142	0.0157067	Sh3pxd2b/Zyx/Sdc4/Rgcc/Tacr1/Fhdc1/Bbs4/S1pr1/Tac1/Fermt2	10
BP	GO:0007422	peripheral nervous system development	8/997	83/28928	0.0963855	2.79663	3.09684	0.00782293	0.0270229	0.0158882	Nrg1/Ntf3/Egr2/Gdnf/Slc5a3/Ndrg1/Ednrb/Osm	8
BP	GO:0045017	glycerolipid biosynthetic process	15/997	215/28928	0.0697674	2.02431	2.84817	0.00789013	0.0272379	0.0160146	Sik1/Pgap1/Ip6k2/Itpkb/Itpkc/Plscr1/Pld2/Capn2/Agpat4/Acsl4/Dgkb/Pgs1/Mfsd2a/Slc27a1/Dgat2	15
BP	GO:0010803	regulation of tumor necrosis factor-mediated signaling pathway	6/997	51/28928	0.117647	3.41353	3.25926	0.00793202	0.0273137	0.0160591	Sphk1/Hspa1b/Tnfrsf11b/Naip6/Tjp2/Mmp8	6
BP	GO:0048010	vascular endothelial growth factor receptor signaling pathway	6/997	51/28928	0.117647	3.41353	3.25926	0.00793202	0.0273137	0.0160591	Ccl2/Hspb1/Hif1a/Pgf/Ptpn1/Flt1	6
BP	GO:0050798	activated T cell proliferation	6/997	51/28928	0.117647	3.41353	3.25926	0.00793202	0.0273137	0.0160591	Lilrb4b/Lilrb4a/Ripk3/Cd86/Lrrc32/Icosl	6
BP	GO:2000378	negative regulation of reactive oxygen species metabolic process	6/997	51/28928	0.117647	3.41353	3.25926	0.00793202	0.0273137	0.0160591	Hif1a/Bcr/Cryab/Mmp3/Ppara/Ptgr1	6
BP	GO:0001910	regulation of leukocyte mediated cytotoxicity	11/997	137/28928	0.080292	2.32968	2.94736	0.00795635	0.0273696	0.0160921	Ccl2/Cxcl5/Cxcl1/Havcr2/Ripk3/Pvr/Cx3cr1/Il18rap/Cd160/Rasgrp1/Klrb1b	11
BP	GO:0002065	columnar/cuboidal epithelial cell differentiation	12/997	156/28928	0.0769231	2.23193	2.91486	0.00796825	0.0273696	0.0160921	Abl2/Hif1a/Fgf2/Nr5a2/Rfx3/Bhlha15/Cebpb/Gja1/Yap1/Serpine1/Sox9/Gata4	12
BP	GO:0006690	icosanoid metabolic process	12/997	156/28928	0.0769231	2.23193	2.91486	0.00796825	0.0273696	0.0160921	Sphk1/Ptgs1/Anxa1/Ptges/Ptgs2/Pdpn/Avpr1a/Il1b/Edn1/Aloxe3/Ptgr1/Ces2a	12
BP	GO:0032388	positive regulation of intracellular transport	12/997	156/28928	0.0769231	2.23193	2.91486	0.00796825	0.0273696	0.0160921	Pgap1/Il6/Dab2/Plk3/Ptgs2/Ldlrap1/Sfn/Bag3/Mavs/Chp2/Zc3h12a/Kif20b	12
BP	GO:0010665	regulation of cardiac muscle cell apoptotic process	7/997	67/28928	0.104478	3.03142	3.14513	0.00816469	0.0280093	0.0164681	Nrg1/Ptpn1/Trem1/Capn2/Cxcr2/Igfbp3/Gata4	7
BP	GO:0032410	negative regulation of transporter activity	7/997	67/28928	0.104478	3.03142	3.14513	0.00816469	0.0280093	0.0164681	Gem/Kcne4/Kcne3/Gpr35/Pln/Agrn/Osr1	7
BP	GO:2000027	regulation of animal organ morphogenesis	9/997	101/28928	0.0891089	2.5855	3.01566	0.00818271	0.0280259	0.0164779	Csf1/Fgfr1/Tnfrsf11b/Fgf2/Gdnf/Edn1/Spry1/Fgfr4/Sox9	9
BP	GO:0061326	renal tubule development	10/997	119/28928	0.0840336	2.43824	2.97027	0.00818486	0.0280259	0.0164779	Ptch1/Cd44/Myc/Pgf/Fgf2/Gdnf/Yap1/Lif/Sox9/Osr1	10
BP	GO:0061387	regulation of extent of cell growth	10/997	119/28928	0.0840336	2.43824	2.97027	0.00818486	0.0280259	0.0164779	Tnfrsf12a/Sema7a/Epha7/Map3k13/Ccr5/Sema6d/Ndel1/Bcl11a/Sin3a/Ifrd1	10
BP	GO:0030041	actin filament polymerization	13/997	176/28928	0.0738636	2.14316	2.87398	0.00819353	0.028038	0.016485	Csf3/Icam1/Baiap2/Fam107a/Ccl11/Cdc42ep3/Ssh1/Fhdc1/Bbs4/Cracd/Cdc42ep2/Pstpip2/Myo1c	13
BP	GO:0003208	cardiac ventricle morphogenesis	8/997	84/28928	0.0952381	2.76334	3.05776	0.00839236	0.0286715	0.0168575	Nrg1/Hif1a/Foxf1/Tgfbr3/Eng/Tgfbr2/Ube4b/Gata4	8
BP	GO:0001953	negative regulation of cell-matrix adhesion	5/997	37/28928	0.135135	3.92095	3.35892	0.0084048	0.0286715	0.0168575	Thbs1/Fam107a/Acer2/Serpine1/Mmp12	5
BP	GO:0010614	negative regulation of cardiac muscle hypertrophy	5/997	37/28928	0.135135	3.92095	3.35892	0.0084048	0.0286715	0.0168575	Errfi1/Tnfrsf1b/Lmna/Rgs4/Ppara	5
BP	GO:0022617	extracellular matrix disassembly	5/997	37/28928	0.135135	3.92095	3.35892	0.0084048	0.0286715	0.0168575	Il6/Sh3pxd2b/Eng/Pdpn/Fgfr4	5
BP	GO:0033687	osteoblast proliferation	5/997	37/28928	0.135135	3.92095	3.35892	0.0084048	0.0286715	0.0168575	Ccn1/Junb/Axin2/Tmem119/Osr2	5
BP	GO:0008361	regulation of cell size	15/997	217/28928	0.0691244	2.00565	2.80936	0.00855584	0.0291021	0.0171106	Tnfrsf12a/Sema7a/Epha7/Slc12a4/Map3k13/Lrrc8a/Ogt/Edn1/Ccr5/Sema6d/Plek/Ndel1/Bcl11a/Sin3a/Ifrd1	15
BP	GO:0032305	positive regulation of icosanoid secretion	4/997	24/28928	0.166667	4.83584	3.55176	0.00859472	0.0291021	0.0171106	Ptges/Il1a/Il1b/Edn1	4
BP	GO:0034260	negative regulation of GTPase activity	4/997	24/28928	0.166667	4.83584	3.55176	0.00859472	0.0291021	0.0171106	Spry2/Sh3bp4/Bbs4/Spry1	4
BP	GO:0043011	myeloid dendritic cell differentiation	4/997	24/28928	0.166667	4.83584	3.55176	0.00859472	0.0291021	0.0171106	Irf4/Batf2/Tgfbr2/Traf6	4
BP	GO:0045623	negative regulation of T-helper cell differentiation	4/997	24/28928	0.166667	4.83584	3.55176	0.00859472	0.0291021	0.0171106	Il4ra/Anxa1/Pf4/Zc3h12a	4
BP	GO:0046579	positive regulation of Ras protein signal transduction	4/997	24/28928	0.166667	4.83584	3.55176	0.00859472	0.0291021	0.0171106	Nrg1/Csf1/Itpkb/Rasgrp1	4
BP	GO:0061099	negative regulation of protein tyrosine kinase activity	4/997	24/28928	0.166667	4.83584	3.55176	0.00859472	0.0291021	0.0171106	Lilrb4b/Lilrb4a/Errfi1/Gprc5a	4
BP	GO:0072202	cell differentiation involved in metanephros development	4/997	24/28928	0.166667	4.83584	3.55176	0.00859472	0.0291021	0.0171106	Gdnf/Yap1/Lif/Osr1	4
BP	GO:0098801	regulation of renal system process	4/997	24/28928	0.166667	4.83584	3.55176	0.00859472	0.0291021	0.0171106	Stc1/F2r/Edn1/Gja1	4
BP	GO:1903236	regulation of leukocyte tethering or rolling	4/997	24/28928	0.166667	4.83584	3.55176	0.00859472	0.0291021	0.0171106	Selp/Sele/Ptafr/Gcnt1	4
BP	GO:2000353	positive regulation of endothelial cell apoptotic process	4/997	24/28928	0.166667	4.83584	3.55176	0.00859472	0.0291021	0.0171106	Thbs1/Rgcc/Ptpn1/Cd160	4
BP	GO:2001224	positive regulation of neuron migration	4/997	24/28928	0.166667	4.83584	3.55176	0.00859472	0.0291021	0.0171106	Sema6a/Il1r1/Rapgef2/Kif20b	4
BP	GO:0044409	symbiont entry into host	10/997	120/28928	0.0833333	2.41792	2.94064	0.00866143	0.0293098	0.0172328	Ch25h/Trim30d/Trim8/Slc7a1/Ifitm1/Axl/Trim12c/Ifitm6/Trim34b/Trim6	10
BP	GO:0010762	regulation of fibroblast migration	6/997	52/28928	0.115385	3.34789	3.2016	0.00871142	0.0293702	0.0172683	Thbs1/Akap12/Fgfr1/Fgf2/Sdc4/Has1	6
BP	GO:0032728	positive regulation of interferon-beta production	6/997	52/28928	0.115385	3.34789	3.2016	0.00871142	0.0293702	0.0172683	Polr3g/Tlr3/Sting1/Tlr8/Mavs/Trim65	6
BP	GO:0033628	regulation of cell adhesion mediated by integrin	6/997	52/28928	0.115385	3.34789	3.2016	0.00871142	0.0293702	0.0172683	Ada/Epha2/Acer2/Serpine1/Plau/Lif	6
BP	GO:0042304	regulation of fatty acid biosynthetic process	6/997	52/28928	0.115385	3.34789	3.2016	0.00871142	0.0293702	0.0172683	Anxa1/Ptgs2/Avpr1a/Il1b/Pdk4/Insig2	6
BP	GO:0042572	retinol metabolic process	6/997	52/28928	0.115385	3.34789	3.2016	0.00871142	0.0293702	0.0172683	Rdh10/Akr1b8/Lrat/Aldh1a3/Dgat2/Ces2a	6
BP	GO:2000404	regulation of T cell migration	6/997	52/28928	0.115385	3.34789	3.2016	0.00871142	0.0293702	0.0172683	Abl2/Ripk3/Adam8/Dock8/Cxcl10/Ecm1	6
BP	GO:0051058	negative regulation of small GTPase mediated signal transduction	7/997	68/28928	0.102941	2.98684	3.09903	0.00883796	0.0297602	0.0174976	Abl2/Spry2/Spry4/Spry3/Rabgef1/Spry1/Kctd10	7
BP	GO:2000134	negative regulation of G1/S transition of mitotic cell cycle	7/997	68/28928	0.102941	2.98684	3.09903	0.00883796	0.0297602	0.0174976	Fam107a/Plk3/Rb1/Prmt2/Ctdsp1/Sde2/Prkdc	7
BP	GO:0071466	cellular response to xenobiotic stimulus	15/997	218/28928	0.0688073	1.99645	2.79012	0.00890501	0.0299676	0.0176196	Ccl2/Pde4b/Myc/Abcc1/Tlr3/Rb1/Cyp2r1/Il1b/Nos2/Rorc/Edn1/Acer2/Serpine1/Ppp1r14a/Gsta5	15
BP	GO:0002291	T cell activation via T cell receptor contact with antigen bound to MHC molecule on antigen presenting cell	3/997	13/28928	0.230769	6.69578	3.88078	0.00901041	0.0300823	0.017687	Icam1/Havcr2/Sema6d	3
BP	GO:0002423	natural killer cell mediated immune response to tumor cell	3/997	13/28928	0.230769	6.69578	3.88078	0.00901041	0.0300823	0.017687	Havcr2/Pvr/Cd160	3
BP	GO:0014745	negative regulation of muscle adaptation	3/997	13/28928	0.230769	6.69578	3.88078	0.00901041	0.0300823	0.017687	Errfi1/Lmna/Oga	3
BP	GO:0034116	positive regulation of heterotypic cell-cell adhesion	3/997	13/28928	0.230769	6.69578	3.88078	0.00901041	0.0300823	0.017687	Gcnt2/Cd44/Il1b	3
BP	GO:0034139	regulation of toll-like receptor 3 signaling pathway	3/997	13/28928	0.230769	6.69578	3.88078	0.00901041	0.0300823	0.017687	Rnf170/Tnfaip3/Tirap	3
BP	GO:0035306	positive regulation of dephosphorylation	3/997	13/28928	0.230769	6.69578	3.88078	0.00901041	0.0300823	0.017687	Ripk3/Plek/Chp2	3
BP	GO:0035726	common myeloid progenitor cell proliferation	3/997	13/28928	0.230769	6.69578	3.88078	0.00901041	0.0300823	0.017687	Nr4a3/Itpkb/Samd9l	3
BP	GO:0036302	atrioventricular canal development	3/997	13/28928	0.230769	6.69578	3.88078	0.00901041	0.0300823	0.017687	Tbx3/Eng/Gata4	3
BP	GO:0042939	tripeptide transport	3/997	13/28928	0.230769	6.69578	3.88078	0.00901041	0.0300823	0.017687	Abcc1/Gja1/Slc7a11	3
BP	GO:0072182	regulation of nephron tubule epithelial cell differentiation	3/997	13/28928	0.230769	6.69578	3.88078	0.00901041	0.0300823	0.017687	Yap1/Lif/Osr1	3
BP	GO:0090557	establishment of endothelial intestinal barrier	3/997	13/28928	0.230769	6.69578	3.88078	0.00901041	0.0300823	0.017687	Icam1/Rapgef2/Tjp2	3
BP	GO:0140971	regulation of AIM2 inflammasome complex assembly	3/997	13/28928	0.230769	6.69578	3.88078	0.00901041	0.0300823	0.017687	Ifi207/Ifi213/Gbp2	3
BP	GO:1903377	negative regulation of oxidative stress-induced neuron intrinsic apoptotic signaling pathway	3/997	13/28928	0.230769	6.69578	3.88078	0.00901041	0.0300823	0.017687	Il10/Hif1a/Fgf2	3
BP	GO:0019395	fatty acid oxidation	10/997	121/28928	0.0826446	2.39794	2.9113	0.00915899	0.0305411	0.0179567	Pdk4/Crot/Slc27a2/Cpt1a/Por/Ppara/Irs2/Mfsd2a/Sox9/Dgat2	10
BP	GO:0042177	negative regulation of protein catabolic process	10/997	121/28928	0.0826446	2.39794	2.9113	0.00915899	0.0305411	0.0179567	Nrg1/Il10/Irak3/Timp3/Prkcg/Mgat3/Ogt/Banp/Nos2/Timp1	10
BP	GO:0009185	ribonucleoside diphosphate metabolic process	11/997	140/28928	0.0785714	2.27975	2.86775	0.00929411	0.0309728	0.0182106	Ier3/Myc/Hif1a/Pfkfb3/Ddit4/Ogt/Entpd1/Slc4a4/Ppara/Nt5e/Cbfa2t3	11
BP	GO:0007020	microtubule nucleation	5/997	38/28928	0.131579	3.81777	3.28382	0.00940954	0.0312629	0.0183811	Hspa1b/Hspa1a/Cenpj/Tppp/Ndel1	5
BP	GO:0045920	negative regulation of exocytosis	5/997	38/28928	0.131579	3.81777	3.28382	0.00940954	0.0312629	0.0183811	Hmox1/Foxf1/Anxa1/Rabgef1/Bcr	5
BP	GO:0070633	transepithelial transport	5/997	38/28928	0.131579	3.81777	3.28382	0.00940954	0.0312629	0.0183811	Abcc1/Edn1/Abcg2/Ednrb/P2ry4	5
BP	GO:0090023	positive regulation of neutrophil chemotaxis	5/997	38/28928	0.131579	3.81777	3.28382	0.00940954	0.0312629	0.0183811	Il1b/Edn1/Cxcr2/C5ar1/Tirap	5
BP	GO:0051651	maintenance of location in cell	16/997	240/28928	0.0666667	1.93434	2.74609	0.00940965	0.0312629	0.0183811	Ccl3/Fgf2/Bdkrb1/Pln/Vps13c/F2r/Xcr1/Bbs4/Plch1/Gja1/Ccr5/Itpr2/Tspo/Cxcl10/Insig2/Sp100	16
BP	GO:0010934	macrophage cytokine production	6/997	53/28928	0.113208	3.28472	3.14533	0.00954413	0.0315605	0.0185561	Sema7a/Irak3/Tlr3/Axl/Il1b/Tirap	6
BP	GO:0141085	regulation of inflammasome-mediated signaling pathway	6/997	53/28928	0.113208	3.28472	3.14533	0.00954413	0.0315605	0.0185561	Ifi207/Atat1/Ogt/Ifi213/Mavs/Gbp2	6
BP	GO:1903426	regulation of reactive oxygen species biosynthetic process	6/997	53/28928	0.113208	3.28472	3.14533	0.00954413	0.0315605	0.0185561	Lcn2/Hif1a/Slc5a3/Ogt/Ppara/Ptgr1	6
BP	GO:0001658	branching involved in ureteric bud morphogenesis	7/997	69/28928	0.101449	2.94356	3.05377	0.00955105	0.0315605	0.0185561	Ptch1/Cd44/Myc/Pgf/Fgf2/Gdnf/Sox9	7
BP	GO:0002707	negative regulation of lymphocyte mediated immunity	7/997	69/28928	0.101449	2.94356	3.05377	0.00955105	0.0315605	0.0185561	Lilrb4b/Lilrb4a/Havcr2/Cd80/Il20rb/Fcgr2b/Klrb1b	7
BP	GO:0042446	hormone biosynthetic process	7/997	69/28928	0.101449	2.94356	3.05377	0.00955105	0.0315605	0.0185561	Dab2/Egr1/Hif1a/Hsd17b2/H6pd/Por/Stc2	7
BP	GO:0048255	mRNA stabilization	7/997	69/28928	0.101449	2.94356	3.05377	0.00955105	0.0315605	0.0185561	Axin2/Gdnf/Arid5a/Slc11a1/Cirbp/Tirap/Vip	7
BP	GO:0061077	chaperone-mediated protein folding	7/997	69/28928	0.101449	2.94356	3.05377	0.00955105	0.0315605	0.0185561	Hspb1/Hspa1b/Hspa1a/Dnajb4/Chordc1/Fkbp5/Hspa2	7
BP	GO:1903409	reactive oxygen species biosynthetic process	7/997	69/28928	0.101449	2.94356	3.05377	0.00955105	0.0315605	0.0185561	Lcn2/Hif1a/Slc5a3/Ogt/Inava/Ppara/Ptgr1	7
BP	GO:0010977	negative regulation of neuron projection development	12/997	160/28928	0.075	2.17613	2.81849	0.00965093	0.0318713	0.0187388	Dab2/Epha4/Epha7/Prag1/Vim/Gfap/Ptpn1/Ccr5/Sema6d/Runx1t1/Bcl11a/Ifrd1	12
BP	GO:0019318	hexose metabolic process	18/997	283/28928	0.0636042	1.84548	2.7004	0.00973781	0.0321389	0.0188961	Sik1/Errfi1/Il6/Myc/Hif1a/Chst15/Ganc/Ogt/Pdk4/Rorc/H6pd/Cpt1a/Pmaip1/Ppara/Irs2/Igfbp3/Midn/Dgat2	18
BP	GO:0072524	pyridine-containing compound metabolic process	14/997	200/28928	0.07	2.03105	2.76439	0.00977622	0.0322328	0.0189514	Ier3/Myc/Hif1a/Pfkfb3/Ddit4/Art2b/Art2a/Ogt/H6pd/Slc4a4/Ppara/Nudt12/Nadsyn1/Cbfa2t3	14
BP	GO:0019693	ribose phosphate metabolic process	23/997	392/28928	0.0586735	1.70241	2.64542	0.00977804	0.0322328	0.0189514	Ada/Ier3/Myc/Hspa1b/Gucy1a1/Hif1a/Pfkfb3/Epha2/Ddit4/Ctps1/Dpyd/Ppat/Ogt/Entpd1/Adcy4/Slc4a4/Ppara/Tspo/Nt5e/Gucy1b1/Cbfa2t3/Cda/Slc25a25	23
BP	GO:0070936	protein K48-linked ubiquitination	9/997	104/28928	0.0865385	2.51092	2.91633	0.00983514	0.0324016	0.0190506	Rnf152/Rnf170/Skp2/Znrf1/Tnfaip3/Dtx3l/Trim6/Trim65/Kbtbd7	9
BP	GO:0002864	regulation of acute inflammatory response to antigenic stimulus	4/997	25/28928	0.16	4.64241	3.44226	0.00995763	0.0326092	0.0191727	Il20rb/Fcgr3/Fcgr2b/Fcer1g	4
BP	GO:0006541	glutamine metabolic process	4/997	25/28928	0.16	4.64241	3.44226	0.00995763	0.0326092	0.0191727	Gfpt2/Glul/Ctps1/Ppat	4
BP	GO:0009125	nucleoside monophosphate catabolic process	4/997	25/28928	0.16	4.64241	3.44226	0.00995763	0.0326092	0.0191727	Ada/Dpyd/Nt5e/Cda	4
BP	GO:0030903	notochord development	4/997	25/28928	0.16	4.64241	3.44226	0.00995763	0.0326092	0.0191727	Id3/Epha2/Yap1/Sox9	4
BP	GO:0043153	entrainment of circadian clock by photoperiod	4/997	25/28928	0.16	4.64241	3.44226	0.00995763	0.0326092	0.0191727	Sik1/Per1/Bhlhe40/Cry2	4
BP	GO:0043306	positive regulation of mast cell degranulation	4/997	25/28928	0.16	4.64241	3.44226	0.00995763	0.0326092	0.0191727	Il4ra/Gab2/Pld2/Fcer1g	4
BP	GO:0045624	positive regulation of T-helper cell differentiation	4/997	25/28928	0.16	4.64241	3.44226	0.00995763	0.0326092	0.0191727	Il4ra/Il6/Anxa1/Shb	4
BP	GO:0071397	cellular response to cholesterol	4/997	25/28928	0.16	4.64241	3.44226	0.00995763	0.0326092	0.0191727	Ptch1/Inhbb/Gramd1a/Lrp8	4
BP	GO:0141156	cAMP/PKA signal transduction	4/997	25/28928	0.16	4.64241	3.44226	0.00995763	0.0326092	0.0191727	Ramp3/Edn1/Sfn/Adrb2	4
BP	GO:1901380	negative regulation of potassium ion transmembrane transport	4/997	25/28928	0.16	4.64241	3.44226	0.00995763	0.0326092	0.0191727	Kcne4/Kcne3/Rgs4/Agrn	4
BP	GO:0030183	B cell differentiation	12/997	161/28928	0.0745342	2.16261	2.79484	0.0101118	0.0330943	0.0194579	Lilrb4a/Il6/Ada/Il10/Lrrc8a/Myb/Tnfaip3/Lyl1/Bcl11a/Prkdc/Bcl3/Hmga1	12
BP	GO:0002312	B cell activation involved in immune response	10/997	123/28928	0.0813008	2.35895	2.85349	0.0102194	0.0334064	0.0196414	Lilrb4a/Il6/Ada/Il10/Lig4/Aplf/Tnfaip3/Icosl/Cd180/Bcl3	10
BP	GO:1905477	positive regulation of protein localization to membrane	10/997	123/28928	0.0813008	2.35895	2.85349	0.0102194	0.0334064	0.0196414	Tnfaip6/Ccl2/Epha2/Ramp3/Slc5a3/Sqstm1/Ssh1/Agrn/Pdzk1/Myo1c	10
BP	GO:0042698	ovulation cycle	8/997	87/28928	0.091954	2.66805	2.94388	0.0102873	0.0335883	0.0197484	Adamts1/Tnfaip6/Ereg/Egr1/Schip1/Runx1/Axl/Has1	8
BP	GO:1901264	carbohydrate derivative transport	8/997	87/28928	0.091954	2.66805	2.94388	0.0102873	0.0335883	0.0197484	Slc28a2/Lrrc8a/Slc28a2b/Gja1/Slc15a3/Mfsd2a/Slc35a5/Slc25a25	8
BP	GO:0042551	neuron maturation	7/997	70/28928	0.1	2.9015	3.00933	0.0103053	0.033607	0.0197593	Rnd1/Abl2/Rb1/Map3k13/Nr4a2/Ednrb/Bcl11a	7
BP	GO:0051898	negative regulation of phosphatidylinositol 3-kinase/protein kinase B signal transduction	7/997	70/28928	0.1	2.9015	3.00933	0.0103053	0.033607	0.0197593	Plk3/Ptpn1/Mmp3/Ppara/Wdr91/Lox/Bank1	7
BP	GO:0002686	negative regulation of leukocyte migration	6/997	54/28928	0.111111	3.22389	3.09039	0.010432	0.0338394	0.019896	Tnfaip6/Ada/Ccn3/Rabgef1/Bcr/Dusp1	6
BP	GO:0030219	megakaryocyte differentiation	6/997	54/28928	0.111111	3.22389	3.09039	0.010432	0.0338394	0.019896	Myb/Rab7b/Pf4/Maf/Meis1/Lox	6
BP	GO:0035329	hippo signaling	6/997	54/28928	0.111111	3.22389	3.09039	0.010432	0.0338394	0.019896	Nuak2/Schip1/Map2k3/Yap1/Tead4/Arrdc3	6
BP	GO:0042307	positive regulation of protein import into nucleus	6/997	54/28928	0.111111	3.22389	3.09039	0.010432	0.0338394	0.019896	Il6/Ptgs2/Bag3/Mavs/Chp2/Zc3h12a	6
BP	GO:0045124	regulation of bone resorption	6/997	54/28928	0.111111	3.22389	3.09039	0.010432	0.0338394	0.019896	Il6/Adam8/Tnfrsf11b/Pdk4/S1pr1/Tmem119	6
BP	GO:0090279	regulation of calcium ion import	6/997	54/28928	0.111111	3.22389	3.09039	0.010432	0.0338394	0.019896	Stc1/Trpv3/Pln/Ppp3cc/Serpine1/Adrb2	6
BP	GO:0007229	integrin-mediated signaling pathway	9/997	105/28928	0.0857143	2.487	2.88399	0.0104382	0.0338394	0.019896	Itga5/Dab2/Sema7a/Zyx/Gab2/Timp1/Plek/Fcer1g/Fermt2	9
BP	GO:0009798	axis specification	9/997	105/28928	0.0857143	2.487	2.88399	0.0104382	0.0338394	0.019896	Pgap1/Stc1/Ets2/Ptch1/Nrarp/Tbx3/Axin2/Tasor/Mdfi	9
BP	GO:0035914	skeletal muscle cell differentiation	9/997	105/28928	0.0857143	2.487	2.88399	0.0104382	0.0338394	0.019896	Maff/Egr1/Myc/Nr4a1/Rb1/Asb2/Egr2/Gata4/Bcl9	9
BP	GO:1990748	cellular detoxification	9/997	105/28928	0.0857143	2.487	2.88399	0.0104382	0.0338394	0.019896	S100a8/S100a9/Ptgs1/Ptges/Ptgs2/Slc11a1/Prdx6/Pim1/Hp	9
BP	GO:0003203	endocardial cushion morphogenesis	5/997	39/28928	0.128205	3.71988	3.21123	0.0104939	0.0339396	0.0199549	Tbx3/Eng/Tgfbr2/Sox9/Cplane2	5
BP	GO:0014741	negative regulation of muscle hypertrophy	5/997	39/28928	0.128205	3.71988	3.21123	0.0104939	0.0339396	0.0199549	Errfi1/Tnfrsf1b/Lmna/Rgs4/Ppara	5
BP	GO:0051953	negative regulation of amine transport	5/997	39/28928	0.128205	3.71988	3.21123	0.0104939	0.0339396	0.0199549	Il1rn/Ptgs1/Il1b/Entpd1/Rgs4	5
BP	GO:0072539	T-helper 17 cell differentiation	5/997	39/28928	0.128205	3.71988	3.21123	0.0104939	0.0339396	0.0199549	Il6/Irf4/Rorc/Pf4/Zc3h12a	5
BP	GO:0097553	calcium ion transmembrane import into cytosol	14/997	202/28928	0.0693069	2.01094	2.72409	0.0106093	0.0342924	0.0201623	Ccl3/Fgf2/Trpv3/Bdkrb1/Pln/F2r/Ppp3cc/Xcr1/Plch1/Ccr5/Itpr2/Cxcl10/Oga/Adrb2	14
BP	GO:0043255	regulation of carbohydrate biosynthetic process	10/997	124/28928	0.0806452	2.33992	2.82501	0.0107834	0.0348346	0.0204811	Sik1/Il6/Hif1a/Ogt/Ptafr/Ppp1r3c/Plek/Ppara/Irs2/Dgat2	10
BP	GO:0035051	cardiocyte differentiation	14/997	203/28928	0.0689655	2.00104	2.70411	0.0110461	0.0356623	0.0209678	Sik1/Nrg1/Fhl2/Tbx3/Tgfbr3/Asb2/Sox6/Lmna/Rgs4/Edn1/Spry1/Ppara/Meis1/Gata4	14
BP	GO:0003229	ventricular cardiac muscle tissue development	7/997	71/28928	0.0985915	2.86064	2.96566	0.0111019	0.0357081	0.0209947	Nrg1/Adamts9/Tbx3/Tgfbr3/Eng/Ube4b/Gata4	7
BP	GO:0045744	negative regulation of G protein-coupled receptor signaling pathway	7/997	71/28928	0.0985915	2.86064	2.96566	0.0111019	0.0357081	0.0209947	Ada/Adm/Pld2/Rgs4/Plek/Arrdc3/Adrb2	7
BP	GO:0060350	endochondral bone morphogenesis	7/997	71/28928	0.0985915	2.86064	2.96566	0.0111019	0.0357081	0.0209947	Thbs1/Stc1/Axin2/Tgfbr2/Por/Tmem119/Sox9	7
BP	GO:0061045	negative regulation of wound healing	7/997	71/28928	0.0985915	2.86064	2.96566	0.0111019	0.0357081	0.0209947	Thbs1/Plat/Plaur/Thbd/Fgf2/Serpine1/Plau	7
BP	GO:0006213	pyrimidine nucleoside metabolic process	3/997	14/28928	0.214286	6.21751	3.68917	0.0111775	0.0357081	0.0209947	Dpyd/Dctd/Cda	3
BP	GO:0007567	parturition	3/997	14/28928	0.214286	6.21751	3.68917	0.0111775	0.0357081	0.0209947	Ccl2/Ptafr/Edn1	3
BP	GO:0010572	positive regulation of platelet activation	3/997	14/28928	0.214286	6.21751	3.68917	0.0111775	0.0357081	0.0209947	Selp/Pdpn/Plek	3
BP	GO:0031915	positive regulation of synaptic plasticity	3/997	14/28928	0.214286	6.21751	3.68917	0.0111775	0.0357081	0.0209947	Ptgs2/Ssh1/Cdc20	3
BP	GO:0035810	positive regulation of urine volume	3/997	14/28928	0.214286	6.21751	3.68917	0.0111775	0.0357081	0.0209947	Edn1/Btc/Ednrb	3
BP	GO:0045628	regulation of T-helper 2 cell differentiation	3/997	14/28928	0.214286	6.21751	3.68917	0.0111775	0.0357081	0.0209947	Il4ra/Il6/Anxa1	3
BP	GO:0048484	enteric nervous system development	3/997	14/28928	0.214286	6.21751	3.68917	0.0111775	0.0357081	0.0209947	Ntf3/Gdnf/Ednrb	3
BP	GO:0060670	branching involved in labyrinthine layer morphogenesis	3/997	14/28928	0.214286	6.21751	3.68917	0.0111775	0.0357081	0.0209947	Socs3/Il10/Adm	3
BP	GO:0072178	nephric duct morphogenesis	3/997	14/28928	0.214286	6.21751	3.68917	0.0111775	0.0357081	0.0209947	Epha4/Epha7/Osr1	3
BP	GO:0072683	T cell extravasation	3/997	14/28928	0.214286	6.21751	3.68917	0.0111775	0.0357081	0.0209947	Ccl2/Icam1/Ripk3	3
BP	GO:1900272	negative regulation of long-term synaptic potentiation	3/997	14/28928	0.214286	6.21751	3.68917	0.0111775	0.0357081	0.0209947	Epha4/Fam107a/Cx3cr1	3
BP	GO:1903430	negative regulation of cell maturation	3/997	14/28928	0.214286	6.21751	3.68917	0.0111775	0.0357081	0.0209947	Shb/Ednrb/Bcl11a	3
BP	GO:1903431	positive regulation of cell maturation	3/997	14/28928	0.214286	6.21751	3.68917	0.0111775	0.0357081	0.0209947	Runx1/Map3k13/Clec7a	3
BP	GO:2000489	regulation of hepatic stellate cell activation	3/997	14/28928	0.214286	6.21751	3.68917	0.0111775	0.0357081	0.0209947	Fgfr1/Myb/Gclc	3
BP	GO:0010811	positive regulation of cell-substrate adhesion	11/997	144/28928	0.0763889	2.21643	2.7647	0.01134	0.0361968	0.021282	Thbs1/Itga5/Dab2/Ccn1/Csf1/Sdc4/Foxf1/Ninj1/Trem1/Abi3bp/Fermt2	11
BP	GO:0034765	regulation of monoatomic ion transmembrane transport	22/997	375/28928	0.0586667	1.70222	2.58593	0.0113437	0.0361968	0.021282	Ccl2/Gem/Kcne4/Lcn2/Arc/Kcne3/Bdkrb1/Gpr35/Pln/F2r/Ppp3cc/Rgs4/Fgf11/Agrn/Edn1/Cxcl10/Oga/Hspa2/Adrb2/Osr1/Gal/Scn3b	22
BP	GO:0001829	trophectodermal cell differentiation	4/997	26/28928	0.153846	4.46385	3.3384	0.0114532	0.0364402	0.0214251	Ada/Junb/Yap1/Tead4	4
BP	GO:0010866	regulation of triglyceride biosynthetic process	4/997	26/28928	0.153846	4.46385	3.3384	0.0114532	0.0364402	0.0214251	Sik1/Mfsd2a/Slc27a1/Dgat2	4
BP	GO:0035025	positive regulation of Rho protein signal transduction	4/997	26/28928	0.153846	4.46385	3.3384	0.0114532	0.0364402	0.0214251	Gpr4/Prag1/F2r/Adgrg1	4
BP	GO:0060009	Sertoli cell development	4/997	26/28928	0.153846	4.46385	3.3384	0.0114532	0.0364402	0.0214251	Icam1/Il1a/Gja1/Sox9	4
BP	GO:1903306	negative regulation of regulated secretory pathway	4/997	26/28928	0.153846	4.46385	3.3384	0.0114532	0.0364402	0.0214251	Hmox1/Foxf1/Rabgef1/Bcr	4
BP	GO:0008154	actin polymerization or depolymerization	14/997	204/28928	0.0686275	1.99123	2.68425	0.0114968	0.0365578	0.0214943	Csf3/Icam1/Baiap2/Fam107a/Ccl11/Cdc42ep3/Ssh1/Fhdc1/Bbs4/Plek/Cracd/Cdc42ep2/Pstpip2/Myo1c	14
BP	GO:0055007	cardiac muscle cell differentiation	12/997	164/28928	0.0731707	2.12305	2.72492	0.0115971	0.0368554	0.0216692	Sik1/Nrg1/Fhl2/Tbx3/Asb2/Sox6/Lmna/Rgs4/Edn1/Ppara/Meis1/Gata4	12
BP	GO:0043603	amide metabolic process	26/997	466/28928	0.055794	1.61887	2.54456	0.0116137	0.0368864	0.0216875	Sphk1/Ada/Csnk1e/Ccn1/Nags/Epha4/Acnat1/Ece1/Mgat3/Gclc/Cpn1/Cmah/Pdk4/Crot/Acer2/Pank1/Aloxe3/Chac2/Ctsl/Acsl4/Acnat2/Slc7a11/Gsta5/Napepld/St6gal1/Dgat2	26
BP	GO:0019934	cGMP-mediated signaling	5/997	40/28928	0.125	3.62688	3.141	0.0116607	0.0368864	0.0216875	Thbs1/Gucy1a1/Nos2/Ednrb/Gucy1b1	5
BP	GO:0030513	positive regulation of BMP signaling pathway	5/997	40/28928	0.125	3.62688	3.141	0.0116607	0.0368864	0.0216875	Ccn1/Cdh5/Tgfbr3/Eng/Gata4	5
BP	GO:0031952	regulation of protein autophosphorylation	5/997	40/28928	0.125	3.62688	3.141	0.0116607	0.0368864	0.0216875	Nrg1/Errfi1/Epha7/Rap2b/Prlr	5
BP	GO:0032872	regulation of stress-activated MAPK cascade	5/997	40/28928	0.125	3.62688	3.141	0.0116607	0.0368864	0.0216875	Il1a/Il1b/Sema4c/Inava/Clec7a	5
BP	GO:0050901	leukocyte tethering or rolling	5/997	40/28928	0.125	3.62688	3.141	0.0116607	0.0368864	0.0216875	Selp/Sele/Cx3cr1/Ptafr/Gcnt1	5
BP	GO:0060674	placenta blood vessel development	5/997	40/28928	0.125	3.62688	3.141	0.0116607	0.0368864	0.0216875	Socs3/Fosl1/Ccn1/Junb/Nr2f2	5
BP	GO:1902175	regulation of oxidative stress-induced intrinsic apoptotic signaling pathway	5/997	40/28928	0.125	3.62688	3.141	0.0116607	0.0368864	0.0216875	Hspb1/Il10/Hif1a/Fgf2/Gata4	5
BP	GO:0031032	actomyosin structure organization	15/997	225/28928	0.0666667	1.93434	2.6582	0.0116765	0.0369149	0.0217042	Sh3pxd2b/Zyx/Sdc4/Csrp1/Rgcc/Flnc/Epb41l4a/Tacr1/Edn1/Fhdc1/Bbs4/Ldb3/S1pr1/Tac1/Fermt2	15
BP	GO:0035019	somatic stem cell population maintenance	8/997	89/28928	0.0898876	2.60809	2.8706	0.0117156	0.0369958	0.0217518	Klf10/Myc/Lig4/Yap1/Med10/Lif/Sox9/Bcl9	8
BP	GO:0040014	regulation of multicellular organism growth	8/997	89/28928	0.0898876	2.60809	2.8706	0.0117156	0.0369958	0.0217518	Ptch1/Csf1/Sh3pxd2b/Bbs4/Stc2/Mfsd2a/Adrb2/Mbd5	8
BP	GO:0042593	glucose homeostasis	20/997	332/28928	0.060241	1.74789	2.58948	0.0117284	0.0370149	0.021763	Ccl2/Il6/Stxbp4/Icam1/Ptch1/Klf7/Hif1a/Lrrc8a/Adgrf5/Gclc/Pim3/Ogt/Bhlha15/Pdk4/Fgfr4/Irs2/Cry2/Sin3a/Hmga1/Mbd5	20
BP	GO:0030330	DNA damage response, signal transduction by p53 class mediator	7/997	72/28928	0.0972222	2.82091	2.92275	0.0119422	0.0375384	0.0220708	Cd44/Ndrg1/Spred1/Acer2/Pmaip1/Sp100/Bcl3	7
BP	GO:0032608	interferon-beta production	7/997	72/28928	0.0972222	2.82091	2.92275	0.0119422	0.0375384	0.0220708	Polr3g/Tlr3/Sting1/Tlr8/Mavs/Tirap/Trim65	7
BP	GO:0032648	regulation of interferon-beta production	7/997	72/28928	0.0972222	2.82091	2.92275	0.0119422	0.0375384	0.0220708	Polr3g/Tlr3/Sting1/Tlr8/Mavs/Tirap/Trim65	7
BP	GO:0061371	determination of heart left/right asymmetry	7/997	72/28928	0.0972222	2.82091	2.92275	0.0119422	0.0375384	0.0220708	Hif1a/Tbx3/Asb2/Eng/Gja1/Tgfbr2/Gata4	7
BP	GO:1901184	regulation of ERBB signaling pathway	7/997	72/28928	0.0972222	2.82091	2.92275	0.0119422	0.0375384	0.0220708	Errfi1/Spry2/Plaur/Fam83b/Rhbdf1/Gprc5a/Cblb	7
BP	GO:1901224	positive regulation of non-canonical NF-kappaB signal transduction	7/997	72/28928	0.0972222	2.82091	2.92275	0.0119422	0.0375384	0.0220708	Sphk1/Havcr2/Tlr3/Cd86/Il1b/Edn1/Ptp4a3	7
BP	GO:1904035	regulation of epithelial cell apoptotic process	7/997	72/28928	0.0972222	2.82091	2.92275	0.0119422	0.0375384	0.0220708	Hmox1/Myc/Rb1/Tia1/Btc/Yap1/Ppara	7
BP	GO:0033500	carbohydrate homeostasis	20/997	333/28928	0.0600601	1.74265	2.57522	0.0120883	0.0379759	0.0223281	Ccl2/Il6/Stxbp4/Icam1/Ptch1/Klf7/Hif1a/Lrrc8a/Adgrf5/Gclc/Pim3/Ogt/Bhlha15/Pdk4/Fgfr4/Irs2/Cry2/Sin3a/Hmga1/Mbd5	20
BP	GO:0035094	response to nicotine	6/997	56/28928	0.107143	3.10875	2.98427	0.0123807	0.0388277	0.0228289	Hmox1/Kcnk1/Tacr1/Edn1/Ppara/Slc7a11	6
BP	GO:0048821	erythrocyte development	6/997	56/28928	0.107143	3.10875	2.98427	0.0123807	0.0388277	0.0228289	Hba-a2/Hba-a1/Adgrf5/Sox6/Alas2/Nemp1	6
BP	GO:0071320	cellular response to cAMP	6/997	56/28928	0.107143	3.10875	2.98427	0.0123807	0.0388277	0.0228289	Stc1/Inhbb/Rapgef2/Ptafr/Itpr2/Hcn4	6
BP	GO:0051054	positive regulation of DNA metabolic process	19/997	312/28928	0.0608974	1.76694	2.57331	0.0124132	0.0388453	0.0228392	Il6/Ereg/Myc/Fgfr1/Fgf2/Prkcg/Bcl7a/Rgcc/Polg2/Pot1b/Skp2/Aplf/Mtnap1/Fgfr4/Anxa3/Oga/Prdm9/Igfbp3/Prkdc	19
BP	GO:0021675	nerve development	9/997	108/28928	0.0833333	2.41792	2.78916	0.0124146	0.0388453	0.0228392	Epha4/Prkcg/Ntf3/Ackr3/Egr2/Ece1/Slitrk6/Edn1/Ctsl	9
BP	GO:0051153	regulation of striated muscle cell differentiation	9/997	108/28928	0.0833333	2.41792	2.78916	0.0124146	0.0388453	0.0228392	Sik1/Nrg1/Ccn3/Sox6/Rgs4/Bhlha15/Edn1/Ppara/Tmem119	9
BP	GO:1904019	epithelial cell apoptotic process	9/997	108/28928	0.0833333	2.41792	2.78916	0.0124146	0.0388453	0.0228392	Hmox1/Myc/Krt18/Rb1/Tia1/Btc/Tgfbr2/Yap1/Ppara	9
BP	GO:0002028	regulation of sodium ion transport	8/997	90/28928	0.0888889	2.57912	2.83471	0.0124821	0.0389728	0.0229142	Sik1/Cxcl1/Per1/Fgf11/Agrn/Adrb2/Osr1/Scn3b	8
BP	GO:0072078	nephron tubule morphogenesis	8/997	90/28928	0.0888889	2.57912	2.83471	0.0124821	0.0389728	0.0229142	Ptch1/Cd44/Myc/Pgf/Fgf2/Gdnf/Sox9/Osr1	8
BP	GO:2000736	regulation of stem cell differentiation	8/997	90/28928	0.0888889	2.57912	2.83471	0.0124821	0.0389728	0.0229142	Fgf2/Tbx3/Sox6/Tgfbr2/Yap1/Trim6/Sox9/Prkdc	8
BP	GO:0051224	negative regulation of protein transport	11/997	146/28928	0.0753425	2.18607	2.71444	0.0124838	0.0389728	0.0229142	Klf7/Ccn3/Inhbb/Anxa1/Rhbdf1/F2r/Pim3/Il1b/Acvr1c/Sp100/Midn	11
BP	GO:0042472	inner ear morphogenesis	10/997	127/28928	0.0787402	2.28465	2.74119	0.0126174	0.0393676	0.0231463	Nr4a3/Spry2/Fzd2/Fgfr1/Tbx3/Aldh1a3/Bcr/Slitrk6/Insig2/Sox9	10
BP	GO:0030888	regulation of B cell proliferation	7/997	73/28928	0.0958904	2.78226	2.88057	0.0128274	0.0399318	0.023478	Ctla4/Ada/Il10/Prlr/Fcgr2b/Irs2/Tirap	7
BP	GO:0031102	neuron projection regeneration	7/997	73/28928	0.0958904	2.78226	2.88057	0.0128274	0.0399318	0.023478	Nrg1/Epha4/Gfap/Adm/Tspo/Ndel1/Tnc	7
BP	GO:0042733	embryonic digit morphogenesis	7/997	73/28928	0.0958904	2.78226	2.88057	0.0128274	0.0399318	0.023478	Bcl2l11/Tbx3/Ece1/Gja1/Zbtb16/Osr1/Osr2	7
BP	GO:0086003	cardiac muscle cell contraction	7/997	73/28928	0.0958904	2.78226	2.88057	0.0128274	0.0399318	0.023478	Kcne4/Stc1/Kcne3/Pln/Hcn4/Scn3b/Gata4	7
BP	GO:0051385	response to mineralocorticoid	5/997	41/28928	0.121951	3.53842	3.07298	0.0129127	0.0401745	0.0236207	Fosb/Fosl1/Avpr1a/Edn1/Pf4	5
BP	GO:0055001	muscle cell development	16/997	249/28928	0.064257	1.86442	2.58821	0.0130323	0.0403295	0.0237118	Fhl2/Rcan1/Csrp1/Tbx3/Flnc/Adm/Asb2/Eng/Lmna/Rgs4/Edn1/Ldb3/Ppara/Meis1/Lox/Gata4	16
BP	GO:0003084	positive regulation of systemic arterial blood pressure	4/997	27/28928	0.148148	4.29853	3.23967	0.0130857	0.0403295	0.0237118	Eng/Ptpn1/Avpr1a/Nr2f2	4
BP	GO:0009648	photoperiodism	4/997	27/28928	0.148148	4.29853	3.23967	0.0130857	0.0403295	0.0237118	Sik1/Per1/Bhlhe40/Cry2	4
BP	GO:0009649	entrainment of circadian clock	4/997	27/28928	0.148148	4.29853	3.23967	0.0130857	0.0403295	0.0237118	Sik1/Per1/Bhlhe40/Cry2	4
BP	GO:0021544	subpallium development	4/997	27/28928	0.148148	4.29853	3.23967	0.0130857	0.0403295	0.0237118	Bcl11b/Aldh1a3/Bbs4/Slc7a11	4
BP	GO:0035739	CD4-positive, alpha-beta T cell proliferation	4/997	27/28928	0.148148	4.29853	3.23967	0.0130857	0.0403295	0.0237118	Lilrb4a/Cd44/Cblb/Tgfbr2	4
BP	GO:0050860	negative regulation of T cell receptor signaling pathway	4/997	27/28928	0.148148	4.29853	3.23967	0.0130857	0.0403295	0.0237118	Lilrb4b/Lilrb4a/Cd160/Cblb	4
BP	GO:0061098	positive regulation of protein tyrosine kinase activity	4/997	27/28928	0.148148	4.29853	3.23967	0.0130857	0.0403295	0.0237118	Epha4/Ptpn1/Il34/Agrn	4
BP	GO:0062009	secondary palate development	4/997	27/28928	0.148148	4.29853	3.23967	0.0130857	0.0403295	0.0237118	Fzd2/Tgfbr3/Lrrc32/Tgfbr2	4
BP	GO:0070168	negative regulation of biomineral tissue development	4/997	27/28928	0.148148	4.29853	3.23967	0.0130857	0.0403295	0.0237118	Ccr1/Hif1a/Sox9/Ecm1	4
BP	GO:0072243	metanephric nephron epithelium development	4/997	27/28928	0.148148	4.29853	3.23967	0.0130857	0.0403295	0.0237118	Yap1/Lif/Sox9/Osr1	4
BP	GO:1902074	response to salt	4/997	27/28928	0.148148	4.29853	3.23967	0.0130857	0.0403295	0.0237118	Fgfr1/Edn1/Ednrb/Zc3h12a	4
BP	GO:1903672	positive regulation of sprouting angiogenesis	4/997	27/28928	0.148148	4.29853	3.23967	0.0130857	0.0403295	0.0237118	Itga5/Il10/Hif1a/Fgf2	4
BP	GO:1905874	regulation of postsynaptic density organization	4/997	27/28928	0.148148	4.29853	3.23967	0.0130857	0.0403295	0.0237118	Lrfn4/Fgfr1/Ptprd/Abi3bp	4
BP	GO:0006090	pyruvate metabolic process	11/997	147/28928	0.0748299	2.17119	2.68962	0.0130876	0.0403295	0.0237118	Ier3/Myc/Hif1a/Pfkfb3/Ddit4/Ogt/Pdk4/Slc4a4/Kyat1/Ppara/Cbfa2t3	11
BP	GO:0016241	regulation of macroautophagy	11/997	147/28928	0.0748299	2.17119	2.68962	0.0130876	0.0403295	0.0237118	Hmox1/Hif1a/Vps13c/Scoc/Sting1/Snx18/Tspo/Bag3/Hspb8/Qsox1/Adrb2	11
BP	GO:0017015	regulation of transforming growth factor beta receptor signaling pathway	11/997	147/28928	0.0748299	2.17119	2.68962	0.0130876	0.0403295	0.0237118	Thbs1/Spry2/Tgfbr3/Eng/Pmepa1/Ogt/Spry1/Spred1/Ppara/Lox/Sin3a	11
BP	GO:0008584	male gonad development	13/997	187/28928	0.0695187	2.01709	2.63624	0.0131728	0.0405694	0.0238529	Bcl2l11/Tnfsf10/Icam1/Adam4/Inhbb/Gm4787/Tlr3/Il1a/Adgrg1/Gja1/Ctsl/Sox9/Gata4	13
BP	GO:0051147	regulation of muscle cell differentiation	12/997	167/28928	0.0718563	2.08491	2.65648	0.0132448	0.0407682	0.0239698	Sik1/Nrg1/Rcan1/Ereg/Ccn3/Eng/Sox6/Rgs4/Bhlha15/Edn1/Ppara/Tmem119	12
BP	GO:0046323	D-glucose import	8/997	91/28928	0.0879121	2.55077	2.7993	0.0132847	0.0408679	0.0240284	Myc/Slc2a1/Crebl2/Oga/Irs2/Slc27a1/Slc2a3/Fgf15	8
BP	GO:0051963	regulation of synapse assembly	14/997	208/28928	0.0673077	1.95294	2.60591	0.0134447	0.0412916	0.0242775	Nrg1/Lrfn4/Fam107a/Fgfr1/Epha7/Ptpn1/Sema4a/Ptprd/Ogt/Sema4c/Slitrk6/Agrn/Flrt2/Abi3bp	14
BP	GO:0003254	regulation of membrane depolarization	6/997	57/28928	0.105263	3.05422	2.93298	0.013445	0.0412916	0.0242775	Gclc/Gja1/Hcn4/Tspo/Oga/Scn3b	6
BP	GO:0032330	regulation of chondrocyte differentiation	6/997	57/28928	0.105263	3.05422	2.93298	0.013445	0.0412916	0.0242775	Axin2/Sox6/Por/Zbtb16/Maf/Sox9	6
BP	GO:0051222	positive regulation of protein transport	19/997	315/28928	0.0603175	1.75011	2.52905	0.013615	0.0414309	0.0243594	Il6/Hcar2/Hif1a/Glul/Plk3/Ptgs2/Lrrc8a/Il1a/Gja1/Sfn/A1cf/Acsl4/Bag3/Oga/Irs2/Mavs/Chp2/Zc3h12a/Kif20b	19
BP	GO:0002638	negative regulation of immunoglobulin production	3/997	15/28928	0.2	5.80301	3.51535	0.0136189	0.0414309	0.0243594	Lilrb4a/Fcgr2b/Prkdc	3
BP	GO:0003376	sphingosine-1-phosphate receptor signaling pathway	3/997	15/28928	0.2	5.80301	3.51535	0.0136189	0.0414309	0.0243594	Sphk1/S1pr1/S1pr3	3
BP	GO:0009163	nucleoside biosynthetic process	3/997	15/28928	0.2	5.80301	3.51535	0.0136189	0.0414309	0.0243594	Ada/Nt5e/Dctd	3
BP	GO:0014029	neural crest formation	3/997	15/28928	0.2	5.80301	3.51535	0.0136189	0.0414309	0.0243594	Kbtbd8/Edn1/Sox9	3
BP	GO:0032486	Rap protein signal transduction	3/997	15/28928	0.2	5.80301	3.51535	0.0136189	0.0414309	0.0243594	Rap2b/Plk2/Rapgef2	3
BP	GO:0032494	response to peptidoglycan	3/997	15/28928	0.2	5.80301	3.51535	0.0136189	0.0414309	0.0243594	Irak3/C5ar1/Inava	3
BP	GO:0034404	nucleobase-containing small molecule biosynthetic process	3/997	15/28928	0.2	5.80301	3.51535	0.0136189	0.0414309	0.0243594	Ada/Nt5e/Dctd	3
BP	GO:0042754	negative regulation of circadian rhythm	3/997	15/28928	0.2	5.80301	3.51535	0.0136189	0.0414309	0.0243594	Ada/Cry2/Sin3a	3
BP	GO:0046007	negative regulation of activated T cell proliferation	3/997	15/28928	0.2	5.80301	3.51535	0.0136189	0.0414309	0.0243594	Lilrb4b/Lilrb4a/Lrrc32	3
BP	GO:0048368	lateral mesoderm development	3/997	15/28928	0.2	5.80301	3.51535	0.0136189	0.0414309	0.0243594	Fgfr1/Foxf1/Yap1	3
BP	GO:0060347	heart trabecula formation	3/997	15/28928	0.2	5.80301	3.51535	0.0136189	0.0414309	0.0243594	Adamts1/Fhl2/Tgfbr3	3
BP	GO:0071318	cellular response to ATP	3/997	15/28928	0.2	5.80301	3.51535	0.0136189	0.0414309	0.0243594	Ccl2/Ptgs2/Ssh1	3
BP	GO:0072160	nephron tubule epithelial cell differentiation	3/997	15/28928	0.2	5.80301	3.51535	0.0136189	0.0414309	0.0243594	Yap1/Lif/Osr1	3
BP	GO:0140970	AIM2 inflammasome complex assembly	3/997	15/28928	0.2	5.80301	3.51535	0.0136189	0.0414309	0.0243594	Ifi207/Ifi213/Gbp2	3
BP	GO:0150011	regulation of neuron projection arborization	3/997	15/28928	0.2	5.80301	3.51535	0.0136189	0.0414309	0.0243594	Spry3/Map3k13/Mfsd2a	3
BP	GO:1903826	L-arginine transmembrane transport	3/997	15/28928	0.2	5.80301	3.51535	0.0136189	0.0414309	0.0243594	Slc7a1/Slc11a1/Slc38a9	3
BP	GO:1903322	positive regulation of protein modification by small protein conjugation or removal	11/997	148/28928	0.0743243	2.15652	2.66499	0.0137132	0.0416945	0.0245144	Sphk1/Trib1/Fam107a/Dcun1d2/Skp2/Cdc20/Rasd2/Cblb/Inava/Arrdc3/Zc3h12a	11
BP	GO:0046546	development of primary male sexual characteristics	13/997	188/28928	0.0691489	2.00636	2.61544	0.0137207	0.0416945	0.0245144	Bcl2l11/Tnfsf10/Icam1/Adam4/Inhbb/Gm4787/Tlr3/Il1a/Adgrg1/Gja1/Ctsl/Sox9/Gata4	13
BP	GO:0099024	plasma membrane invagination	7/997	74/28928	0.0945946	2.74467	2.8391	0.0137588	0.0417641	0.0245553	Thbs1/Fcgr3/Snx18/Fcgr2b/Clec7a/Havcr1/Fcer1g	7
BP	GO:1904894	positive regulation of receptor signaling pathway via STAT	7/997	74/28928	0.0945946	2.74467	2.8391	0.0137588	0.0417641	0.0245553	Cxcl5/Il6/Il10/Cenpj/F2r/Prlr/Lif	7
BP	GO:0006885	regulation of pH	9/997	110/28928	0.0818182	2.37396	2.72768	0.0138787	0.0421046	0.0247555	Clic4/Slc9a9/Avpr1a/Pdk4/Edn1/Slc4a4/Slc11a1/Ednrb/Chp2	9
BP	GO:0009141	nucleoside triphosphate metabolic process	18/997	294/28928	0.0612245	1.77643	2.52809	0.0139638	0.0423392	0.0248935	Ada/Ier3/Myc/Hspa1b/Hif1a/Pfkfb3/Ddit4/Ctps1/Ogt/Entpd1/Slc4a4/Ppara/Tspo/Nt5e/Oga/Cmpk2/Cbfa2t3/Slc25a25	18
BP	GO:0051781	positive regulation of cell division	8/997	92/28928	0.0869565	2.52305	2.76437	0.0141244	0.0427789	0.025152	Ereg/Pgf/Fgf2/Il1a/Il1b/Btc/Pdgfc/Kif20b	8
BP	GO:1902369	negative regulation of RNA catabolic process	8/997	92/28928	0.0869565	2.52305	2.76437	0.0141244	0.0427789	0.025152	Axin2/Gdnf/Arid5a/A1cf/Slc11a1/Cirbp/Tirap/Vip	8
BP	GO:0002861	regulation of inflammatory response to antigenic stimulus	5/997	42/28928	0.119048	3.45417	3.00706	0.0142524	0.0430476	0.02531	Il10/Il20rb/Fcgr3/Fcgr2b/Fcer1g	5
BP	GO:0014047	glutamate secretion	5/997	42/28928	0.119048	3.45417	3.00706	0.0142524	0.0430476	0.02531	Il1rn/Kcnk1/Avpr1a/Il1b/Gja1	5
BP	GO:0043277	apoptotic cell clearance	5/997	42/28928	0.119048	3.45417	3.00706	0.0142524	0.0430476	0.02531	Thbs1/Ccl2/Anxa1/Axl/Mertk	5
BP	GO:0070302	regulation of stress-activated protein kinase signaling cascade	5/997	42/28928	0.119048	3.45417	3.00706	0.0142524	0.0430476	0.02531	Il1a/Il1b/Sema4c/Inava/Clec7a	5
BP	GO:2000677	regulation of transcription regulatory region DNA binding	5/997	42/28928	0.119048	3.45417	3.00706	0.0142524	0.0430476	0.02531	Rb1/Niban2/Trim6/Lif/Traf6	5
BP	GO:0098742	cell-cell adhesion via plasma-membrane adhesion molecules	15/997	231/28928	0.0649351	1.88409	2.54884	0.0145529	0.0438909	0.0258058	Selp/Itga5/Emb/Nrg1/Lrfn4/Il10/Sele/Pvr/Il1rn/Cdh5/Pcdh18/Ptprd/Tnfaip3/Tgfbr2/Cplane2	15
BP	GO:0045604	regulation of epidermal cell differentiation	6/997	58/28928	0.103448	3.00156	2.8828	0.0145716	0.0438909	0.0258058	Maff/Errfi1/Ptch1/Klf7/Fgf2/Sfn	6
BP	GO:0045687	positive regulation of glial cell differentiation	6/997	58/28928	0.103448	3.00156	2.8828	0.0145716	0.0438909	0.0258058	Tnfrsf1b/Ntf3/Egr2/Il1b/Il34/Lif	6
BP	GO:0045777	positive regulation of blood pressure	6/997	58/28928	0.103448	3.00156	2.8828	0.0145716	0.0438909	0.0258058	Eng/Ptpn1/Tacr1/Avpr1a/Nr2f2/Adrb2	6
BP	GO:0051496	positive regulation of stress fiber assembly	6/997	58/28928	0.103448	3.00156	2.8828	0.0145716	0.0438909	0.0258058	Sh3pxd2b/Sdc4/Rgcc/Tacr1/Tac1/Fermt2	6
BP	GO:0006612	protein targeting to membrane	10/997	130/28928	0.0769231	2.23193	2.65969	0.0146768	0.0441351	0.0259494	Ccl2/Rabgef1/Vps37b/Zdhhc13/Ogt/Rtp4/Tram2/Oga/Pdzk1/Myo1c	10
BP	GO:0007498	mesoderm development	10/997	130/28928	0.0769231	2.23193	2.65969	0.0146768	0.0441351	0.0259494	Nr4a3/Ets2/Fgfr1/Epha2/Foxf1/Tbx3/Ovol1/Gja1/Yap1/Osr1	10
BP	GO:0008306	associative learning	10/997	130/28928	0.0769231	2.23193	2.65969	0.0146768	0.0441351	0.0259494	Abl2/Hif1a/Rin1/Pln/Tacr1/Meis2/Slc7a11/Adrb2/Nts/Tac1	10
BP	GO:0002070	epithelial cell maturation	4/997	28/28928	0.142857	4.14501	3.14563	0.0148593	0.0443228	0.0260597	Hif1a/Rfx3/Bhlha15/Gja1	4
BP	GO:0002504	antigen processing and presentation of peptide or polysaccharide antigen via MHC class II	4/997	28/28928	0.142857	4.14501	3.14563	0.0148593	0.0443228	0.0260597	Thbs1/Fcgr2b/Fcer1g/Traf6	4
BP	GO:0002903	negative regulation of B cell apoptotic process	4/997	28/28928	0.142857	4.14501	3.14563	0.0148593	0.0443228	0.0260597	Ada/Cd44/Bcl2a1a/Irs2	4
BP	GO:0003181	atrioventricular valve morphogenesis	4/997	28/28928	0.142857	4.14501	3.14563	0.0148593	0.0443228	0.0260597	Ccn1/Axin2/Tgfbr2/Gata4	4
BP	GO:0034656	nucleobase-containing small molecule catabolic process	4/997	28/28928	0.142857	4.14501	3.14563	0.0148593	0.0443228	0.0260597	Ada/Dpyd/Dctd/Cda	4
BP	GO:0036120	cellular response to platelet-derived growth factor stimulus	4/997	28/28928	0.142857	4.14501	3.14563	0.0148593	0.0443228	0.0260597	Ccl2/Ptpn1/Ptprd/Has1	4
BP	GO:0045063	T-helper 1 cell differentiation	4/997	28/28928	0.142857	4.14501	3.14563	0.0148593	0.0443228	0.0260597	Il4ra/Gadd45g/Anxa1/Sema4a	4
BP	GO:0045723	positive regulation of fatty acid biosynthetic process	4/997	28/28928	0.142857	4.14501	3.14563	0.0148593	0.0443228	0.0260597	Anxa1/Ptgs2/Avpr1a/Il1b	4
BP	GO:0048311	mitochondrion distribution	4/997	28/28928	0.142857	4.14501	3.14563	0.0148593	0.0443228	0.0260597	Epcip/Ogt/Bhlha15/Tspan4	4
BP	GO:0060713	labyrinthine layer morphogenesis	4/997	28/28928	0.142857	4.14501	3.14563	0.0148593	0.0443228	0.0260597	Socs3/Ccn1/Il10/Adm	4
BP	GO:0090200	positive regulation of release of cytochrome c from mitochondria	4/997	28/28928	0.142857	4.14501	3.14563	0.0148593	0.0443228	0.0260597	Bcl2l11/Tnfsf10/Plaur/Pmaip1	4
BP	GO:0099150	regulation of postsynaptic specialization assembly	4/997	28/28928	0.142857	4.14501	3.14563	0.0148593	0.0443228	0.0260597	Lrfn4/Fgfr1/Ptprd/Abi3bp	4
BP	GO:1903909	regulation of receptor clustering	4/997	28/28928	0.142857	4.14501	3.14563	0.0148593	0.0443228	0.0260597	Tnfaip6/Ssh1/Agrn/Slc7a11	4
BP	GO:2000647	negative regulation of stem cell proliferation	4/997	28/28928	0.142857	4.14501	3.14563	0.0148593	0.0443228	0.0260597	Ptch1/Fgf2/Ovol1/Sfn	4
BP	GO:1904062	regulation of monoatomic cation transmembrane transport	20/997	340/28928	0.0588235	1.70677	2.47674	0.0148605	0.0443228	0.0260597	Gem/Kcne4/Lcn2/Kcne3/Bdkrb1/Gpr35/Pln/F2r/Ppp3cc/Rgs4/Fgf11/Agrn/Edn1/Cxcl10/Oga/Hspa2/Adrb2/Osr1/Gal/Scn3b	20
BP	GO:0034109	homotypic cell-cell adhesion	8/997	93/28928	0.0860215	2.49592	2.72989	0.015002	0.0447206	0.0262936	Il6/Plaur/Rap2b/Pdpn/Entpd1/Tjp2/Plek/Slc7a11	8
BP	GO:0014902	myotube differentiation	11/997	150/28928	0.0733333	2.12777	2.61633	0.0150321	0.0447614	0.0263176	Sik1/Il4ra/Rcan1/Myc/Ccn3/Avpr1a/Capn2/Bhlha15/Tmem119/Cxcl10/Bcl9	11
BP	GO:1903844	regulation of cellular response to transforming growth factor beta stimulus	11/997	150/28928	0.0733333	2.12777	2.61633	0.0150321	0.0447614	0.0263176	Thbs1/Spry2/Tgfbr3/Eng/Pmepa1/Ogt/Spry1/Spred1/Ppara/Lox/Sin3a	11
[truncated: 274 more rows]

## Sheet: KEGG
category	subcategory	ID	Description	GeneRatio	BgRatio	RichFactor	FoldEnrichment	zScore	pvalue	p.adjust	qvalue	geneID	Count
[truncated: 303 more rows]

[truncated: 1 more sheets: Prepare documents]
