# Supplementary material for: Identification of autophagy-related genes in intestinal ischemia-reperfusion injury and their role in immune infiltration
Source: Front Physiol. 2025 May 26;16:1601968. doi: 10.3389/fphys.2025.1601968 (PMC12146356; doi:10.3389/fphys.2025.1601968)
Supplement: Supplementary file 6 [file Table5.xls]

## Sheet: GSE96733 (3 h)
id	label	Myc	Hif1a	Zfyve1	Sqstm1	Gabarapl1
GSM2539097	0	11.6111	13.5467	10.4237	12.5645	10.3902
GSM2539098	0	11.0758	13.8303	10.657	13.1323	10.8514
GSM2539099	0	11.324	13.9198	10.7133	12.9566	10.8312
GSM2539100	0	11.0458	13.9375	10.3058	12.8778	11.0475
GSM2539105	1	13.0419	15.0178	9.21387	14.2609	12.4649
GSM2539106	1	14.1827	14.9328	9.71958	13.8857	11.6874
GSM2539107	1	14.2459	15.0178	9.32836	13.8024	11.4376
GSM2539108	1	13.5108	15.0467	9.50482	13.7983	11.9223

## Sheet: GSE37013
id	label	MYC	HIF1A	ZFYVE1	SQSTM1	GABARAPL1
GSM908514	0	7.77749	7.41439	9.39289	8.86445	7.7482
GSM908515	0	7.88941	7.38723	9.28269	9.16584	7.61187
GSM908516	0	7.61332	7.47423	9.5013	9.32231	7.68266
GSM908517	0	7.79271	7.45309	9.02833	9.25416	7.72393
GSM908518	0	7.55784	7.35243	9.23899	9.31026	7.61209
GSM908519	0	7.79024	7.45973	9.59378	8.73809	7.80447
GSM908520	0	7.67386	7.38794	9.19584	8.77086	7.63319
GSM908528	1	7.7261	7.42378	8.4562	7.74865	7.81373
GSM908529	1	7.85503	7.39529	9.41425	9.08848	7.61533
GSM908530	1	7.72373	7.31366	9.53744	8.64727	7.77169
GSM908531	1	8.03185	7.47347	9.15057	8.58686	7.74365
GSM908532	1	7.64276	7.43995	9.52606	9.02524	7.85515
GSM908533	1	7.82722	7.39035	9.49178	8.23948	7.66103
GSM908534	1	7.73085	7.41881	9.16098	8.33352	7.78995
GSM908535	1	7.71346	7.35152	9.30616	8.79758	7.86023
GSM908536	1	7.70726	7.36063	9.13842	9.22264	7.59379
GSM908537	1	7.76068	7.26216	9.36828	8.54345	7.46891
GSM908538	1	7.87067	7.34801	9.48507	8.3521	7.74846
GSM908539	1	7.61886	7.29586	9.50076	9.02154	7.52647
GSM908540	1	7.76068	7.32029	9.31515	8.03119	7.54563
GSM908541	1	7.67935	7.43672	9.17253	8.4754	7.5933
