# Supplementary material for: Identification of autophagy-related genes in intestinal ischemia-reperfusion injury and their role in immune infiltration
Source: Front Physiol. 2025 May 26;16:1601968. doi: 10.3389/fphys.2025.1601968 (PMC12146356; doi:10.3389/fphys.2025.1601968)
Supplement: Supplementary file 7 [file Table3.xls]

## Sheet: Homologous ID conversion
id	human_gene_symbol	human_gene_entrezid	mouse_gene_symbol	mouse_gene_entrezid
AMBRA1	AMBRA1	55626	Ambra1	228361
APOL1
ARNT	ARNT	405	Arnt	11863
ARSA	ARSA	410	Arsa	11883
ARSB	ARSB	411	Arsb	11881
ATF4	ATF4	468	Atf4	11911
ATF6	ATF6	22926	Atf6	226641
ATG10	ATG10	83734	Atg10	66795
ATG12	ATG12	9140	Atg12	67526
ATG16L1	ATG16L1	55054	Atg16l1	77040
ATG16L2	ATG16L2	89849	Atg16l2	73683
ATG2A	ATG2A	23130	Atg2a	329015
ATG2B	ATG2B	55102	Atg2b	76559
ATG3	ATG3	64422	Atg3	67841
ATG4A	ATG4A	115201	Atg4a	666468
ATG4B	ATG4B	23192	Atg4b	66615
ATG4C	ATG4C	84938	Atg4c	242557
ATG4D	ATG4D	84971	Atg4d	235040
ATG5	ATG5	9474	Atg5	11793
ATG7	ATG7	10533	Atg7	74244
ATG9A	ATG9A	79065	Atg9a	245860
ATG9B	ATG9B	285973	Atg9b	213948
ATIC	ATIC	471	Atic	108147
BAG1	BAG1	573	Bag1	12017
BAG3	BAG3	9531	Bag3	29810
BAK1	BAK1	578	Bak1	12018
BAX	BAX	581	Bax	12028
BCL2	BCL2	596	Bcl2	12043
BCL2L1	BCL2L1	598	Bcl2l1	12048
BECN1	BECN1	8678	Becn1	56208
BID	BID	637	Bid	12122
BIRC5	BIRC5	332	Birc5	11799
BIRC6	BIRC6	57448	Birc6	12211
BNIP1	BNIP1	662	Bnip1	224630
BNIP3	BNIP3	664	Bnip3	12176
BNIP3L	BNIP3L	665	Bnip3l	12177
BNIP3L	BNIP3L	665	Bnip3l-ps	100043324
C12orf44
C17orf88
CALCOCO2	CALCOCO2	10241
CAMKK2	CAMKK2	10645	Camkk2	207565
CANX	CANX	821	Canx	12330
CAPN1	CAPN1	823	Capn1	12333
CAPN10	CAPN10	11132	Capn10	23830
CAPN2	CAPN2	824	Capn2	12334
CAPNS1	CAPNS1	826	Capns1	12336
CASP1	CASP1	834	Casp1	12362
CASP3	CASP3	836	Casp3	12367
CASP4	CASP4	837	Casp4	12363
CASP8	CASP8	841	Casp8	12370
CCL2	CCL2	6347	Ccl12	20293
CCR2	CCR2	729230	Ccr2	12772
CD46	CD46	4179	Cd46	17221
CDKN1A	CDKN1A	1026	Cdkn1a	12575
CDKN1B	CDKN1B	1027	Cdkn1b	12576
CDKN2A	CDKN2A	1029	Cdkn2a	12578
CFLAR	CFLAR	8837	Cflar	12633
CHMP2B	CHMP2B	25978	Chmp2b	68942
CHMP4B	CHMP4B	128866	Chmp4b	75608
CLN3	CLN3	1201	Cln3	12752
CTSB	CTSB	1508	Ctsb	13030
CTSD	CTSD	1509	Ctsd	13033
CTSL1
CX3CL1	CX3CL1	6376	Cx3cl1	20312
CXCR4	CXCR4	7852	Cxcr4	12767
DAPK1	DAPK1	1612	Dapk1	69635
DAPK2	DAPK2	23604	Dapk2	13143
DDIT3	DDIT3	1649	Ddit3	13198
DIRAS3	DIRAS3	9077
DLC1	DLC1	10395	Dlc1	50768
DNAJB1	DNAJB1	3337	Dnajb1	81489
DNAJB9	DNAJB9	4189	Dnajb9	27362
DRAM1	DRAM1	55332	Dram1	71712
EDEM1	EDEM1	9695	Edem1	192193
EEF2	EEF2	1938	Eef2	13629
EEF2K	EEF2K	29904	Eef2k	13631
EGFR	EGFR	1956	Egfr	13649
EIF2AK2	EIF2AK2	5610	Eif2ak2	19106
EIF2AK3	EIF2AK3	9451	Eif2ak3	13666
EIF2S1	EIF2S1	1965	Eif2s1	13665
EIF4EBP1	EIF4EBP1	1978	Eif4ebp1	13685
EIF4G1	EIF4G1	1981	Eif4g1	208643
ERBB2	ERBB2	2064	Erbb2	13866
ERN1	ERN1	2081	Ern1	78943
ERO1L
FADD	FADD	8772	Fadd	14082
FAM48A
FAS	FAS	355	Fas	14102
FKBP1A	FKBP1A	2280	Fkbp1a	14225
FKBP1B	FKBP1B	2281	Fkbp1b	14226
FOS	FOS	2353	Fos	14281
FOXO1	FOXO1	2308	Foxo1	56458
FOXO3	FOXO3	2309	Foxo3	56484
GAA	GAA	2548	Gaa	14387
GABARAP	GABARAP	11337	Gabarap	56486
GABARAPL1	GABARAPL1	23710	Gabarapl1	57436
GABARAPL2	GABARAPL2	11345	Gabarapl2	93739
GAPDH	GAPDH	2597	Gapdh	14433
GAPDH	GAPDH	2597	Gapdh-ps15	100042025
GNAI3	GNAI3	2773	Gnai3	14679
GNB2L1
GOPC	GOPC	57120	Gopc	94221
GRID1	GRID1	2894	Grid1	14803
GRID2	GRID2	2895	Grid2	14804
HDAC1	HDAC1	3065	Hdac1	433759
HDAC6	HDAC6	10013	Hdac6	15185
HGS	HGS	9146	Hgs	15239
HIF1A	HIF1A	3091	Hif1a	15251
HSP90AB1	HSP90AB1	3326	Hsp90ab1	15516
HSPA5	HSPA5	3309	Hspa5	14828
HSPA8	HSPA8	3312	Hspa8	15481
HSPB8	HSPB8	26353	Hspb8	80888
IFNG	IFNG	3458	Ifng	15978
IKBKB	IKBKB	3551	Ikbkb	16150
IKBKE	IKBKE	9641	Ikbke	56489
IL24	IL24	11009	Il24	93672
IRGM	IRGM	345611	Irgm2	54396
ITGA3	ITGA3	3675	Itga3	16400
ITGA6	ITGA6	3655	Itga6	16403
ITGB1	ITGB1	3688	Itgb1	16412
ITGB4	ITGB4	3691	Itgb4	192897
ITPR1	ITPR1	3708	Itpr1	16438
GAA	GAA	2548	Gaa	14387
GABARAP	GABARAP	11337	Gabarap	56486
GABARAPL1	GABARAPL1	23710	Gabarapl1	57436
GABARAPL2	GABARAPL2	11345	Gabarapl2	93739
GAPDH	GAPDH	2597	Gapdh	14433
GAPDH	GAPDH	2597	Gapdh-ps15	100042025
GNAI3	GNAI3	2773	Gnai3	14679
GNB2L1
GOPC	GOPC	57120	Gopc	94221
GRID1	GRID1	2894	Grid1	14803
GRID2	GRID2	2895	Grid2	14804
KIAA0226
KIAA0652
KIAA0831
KIF5B	KIF5B	3799	Kif5b	16573
KLHL24	KLHL24	54800	Klhl24	75785
LAMP1	LAMP1	3916	Lamp1	16783
LAMP2	LAMP2	3920	Lamp2	16784
MAP1LC3A	MAP1LC3A	84557	Map1lc3a	66734
MAP1LC3B	MAP1LC3B	81631	Map1lc3b	67443
MAP1LC3C	MAP1LC3C	440738
MAP2K7	MAP2K7	5609	Map2k7	26400
MAPK1	MAPK1	5594	Mapk1	26413
MAPK3	MAPK3	5595	Mapk3	26417
MAPK8	MAPK8	5599	Mapk8	26419
MAPK8IP1	MAPK8IP1	9479	Mapk8ip1	19099
MAPK9	MAPK9	5601	Mapk9	26420
MBTPS2	MBTPS2	51360	Mbtps2	270669
MLST8	MLST8	64223	Mlst8	56716
MTMR14	MTMR14	64419	Mtmr14	97287
MTOR	MTOR	2475	Mtor	56717
MYC	MYC	4609	Myc	17869
NAF1	NAF1	92345	Naf1	234344
NAMPT	NAMPT	10135	Nampt	59027
NBR1	NBR1	4077	Nbr1	17966
NCKAP1	NCKAP1	10787	Nckap1	50884
NFE2L2	NFE2L2	4780	Nfe2l2	18024
NFKB1	NFKB1	4790	Nfkb1	18033
NKX2-3	NKX2-3	159296	Nkx2-3	18089
NLRC4	NLRC4	58484	Nlrc4	268973
NPC1	NPC1	4864	Npc1	18145
NRG1	NRG1	3084
NRG2	NRG2	9542	Nrg2	100042150
NRG3	NRG3	10718	Nrg3	18183
P4HB	P4HB	5034	P4hb	18453
PARK2
PARP1	PARP1	142	Parp1	11545
PEA15	PEA15	8682	Pea15a	18611
PELP1	PELP1	27043	Pelp1	75273
PEX14	PEX14	5195	Pex14	56273
PEX3	PEX3	8504	Pex3	56535
PIK3C3	PIK3C3	5289	Pik3c3	225326
PIK3R4	PIK3R4	30849	Pik3r4	75669
PINK1	PINK1	65018	Pink1	68943
PPP1R15A	PPP1R15A	23645	Ppp1r15a	17872
PRKAB1	PRKAB1	5564	Prkab1	19079
PRKAR1A	PRKAR1A	5573	Prkar1a	19084
PRKCD	PRKCD	5580	Prkcd	18753
PRKCQ	PRKCQ	5588	Prkcq	18761
PTEN	PTEN	5728	Pten	19211
PTK6	PTK6	5753	Ptk6	20459
RAB11A	RAB11A	8766	Rab11a	53869
RAB1A	RAB1A	5861	Rab1a	19324
RAB24	RAB24	53917	Rab24	19336
RAB33B	RAB33B	83452	Rab33b	19338
RAB5A	RAB5A	5868	Rab5a	271457
RAB7A	RAB7A	7879	Rab7	19349
RAC1	RAC1	5879	Rac1	19353
RAF1	RAF1	5894	Raf1	110157
RB1	RB1	5925	Rb1	19645
RB1CC1	RB1CC1	9821	Rb1cc1	12421
RELA	RELA	5970	Rela	19697
RGS19	RGS19	10287	Rgs19	56470
RHEB	RHEB	6009	Rheb	19744
RPS6KB1	RPS6KB1	6198	Rps6kb1	72508
RPTOR	RPTOR	57521	Rptor	74370
SAR1A	SAR1A	56681	Sar1a	20224
SERPINA1	SERPINA1	5265	Serpina1e	20704
SERPINA1	SERPINA1	5265	Serpina1a	20700
SERPINA1	SERPINA1	5265	Serpina1c	20702
SERPINA1	SERPINA1	5265	Serpina1b	20701
SERPINA1	SERPINA1	5265	Serpina1d	20703
SESN2	SESN2	83667	Sesn2	230784
SH3GLB1	SH3GLB1	51100	Sh3glb1	54673
SIRT1	SIRT1	23411	Sirt1	93759
SIRT2	SIRT2	22933	Sirt2	64383
SPHK1	SPHK1	8877	Sphk1	20698
SPNS1	SPNS1	83985	Spns1	73658
SQSTM1	SQSTM1	8878	Sqstm1	18412
ST13	ST13	6767	St13	70356
STK11	STK11	6794	Stk11	20869
TBK1	TBK1	29110	Tbk1	56480
TM9SF1	TM9SF1	10548	Tm9sf1	74140
TMEM49
TMEM74	TMEM74	157753	Tmem74	239408
TNFSF10	TNFSF10	8743	Tnfsf10	22035
TP53	TP53	7157	Trp53	22059
TP53INP2	TP53INP2	58476	Trp53inp2	68728
TP63	TP63	8626	Trp63	22061
TP73	TP73	7161	Trp73	22062
TSC1	TSC1	7248	Tsc1	64930
TSC2	TSC2	7249	Tsc2	22084
TUSC1	TUSC1	286319	Tusc1	69136
ULK1	ULK1	8408	Ulk1	22241
ULK2	ULK2	9706	Ulk2	29869
ULK3	ULK3	25989	Ulk3	71742
USP10	USP10	9100	Usp10	22224
UVRAG	UVRAG	7405	Uvrag	78610
VAMP3	VAMP3	9341	Vamp3	22319
VAMP7	VAMP7	6845	Vamp7	20955
VEGFA	VEGFA	7422	Vegfa	22339
WDFY3	WDFY3	23001	Wdfy3	72145
WDR45	WDR45	11152	Wdr45	54636
WDR45L
WIPI1	WIPI1	55062	Wipi1	52639
WIPI2	WIPI2	26100	Wipi2	74781
ZFYVE1	ZFYVE1	53349	Zfyve1	217695

## Sheet: Data of 11 DEARGs
Group	Sphk1	Tnfsf10	Myc	Hif1a	Rb1	Zfyve1	Sqstm1	Capn2	Bag3	Gabarapl1	Hspb8
Sham	5.53031	13.8053	11.6111	13.5467	10.5168826666667	10.4237	12.5645	11.3222	10.2213	10.3902	5.47035
Sham	4.82637	13.7108	11.0758	13.8303	10.1878276666667	10.657	13.1323	11.577	8.59933	10.8514	7.55312
Sham	5.0652	13.6661	11.324	13.9198	10.4347583333333	10.7133	12.9566	11.4257	8.91756	10.8312	7.68405
Sham	4.80687	13.5262	11.0458	13.9375	10.5774	10.3058	12.8778	10.5815	8.57402	11.0475	7.94298
II/R	9.42851	12.158	13.0419	15.0178	9.13610366666667	9.21387	14.2609	12.8735	10.7159	12.4649	10.6553
II/R	8.46992	12.3466	14.1827	14.9328	9.31784633333333	9.71958	13.8857	12.1762	11.0188	11.6874	8.9108
II/R	8.86984	12.1855	14.2459	15.0178	9.44930666666667	9.32836	13.8024	12.9283	11.3852	11.4376	9.40224
II/R	8.74575	11.9886	13.5108	15.0467	9.52999	9.50482	13.7983	12.7077	10.2468	11.9223	9.50119

## Sheet: GO
	ONTOLOGY	ID	Description	GeneRatio	BgRatio	pvalue	p.adjust	qvalue	geneID	Count
GO:0016236	BP	GO:0016236	macroautophagy	2025-06-11	249/28943	1.70123e-10	1.73355e-07	5.3902e-08	Hif1a/Zfyve1/Sqstm1/Bag3/Gabarapl1/Hspb8	6
GO:0006914	BP	GO:0006914	autophagy	2025-06-11	469/28943	7.56358e-09	2.56909e-06	7.9882e-07	Hif1a/Zfyve1/Sqstm1/Bag3/Gabarapl1/Hspb8	6
GO:0061919	BP	GO:0061919	process utilizing autophagic mechanism	2025-06-11	469/28943	7.56358e-09	2.56909e-06	7.9882e-07	Hif1a/Zfyve1/Sqstm1/Bag3/Gabarapl1/Hspb8	6
GO:0061912	BP	GO:0061912	selective autophagy	2025-04-11	83/28943	2.04292e-08	5.20434e-06	1.61821e-06	Sqstm1/Bag3/Gabarapl1/Hspb8	4
GO:0016239	BP	GO:0016239	positive regulation of macroautophagy	2025-03-11	77/28943	2.94169e-06	0.00055699	0.000173187	Hif1a/Bag3/Hspb8	3
GO:0000422	BP	GO:0000422	autophagy of mitochondrion	2025-03-11	84/28943	3.82623e-06	0.00055699	0.000173187	Hif1a/Sqstm1/Gabarapl1	3
GO:0061726	BP	GO:0061726	mitochondrion disassembly	2025-03-11	84/28943	3.82623e-06	0.00055699	0.000173187	Hif1a/Sqstm1/Gabarapl1	3
GO:0016241	BP	GO:0016241	regulation of macroautophagy	2025-03-11	117/28943	1.03745e-05	0.00122831	0.000381924	Hif1a/Bag3/Hspb8	3
GO:2001233	BP	GO:2001233	regulation of apoptotic signaling pathway	2025-04-11	401/28943	1.10914e-05	0.00122831	0.000381924	Tnfsf10/Myc/Hif1a/Rb1	4
GO:1903008	BP	GO:1903008	organelle disassembly	2025-03-11	123/28943	1.20541e-05	0.00122831	0.000381924	Hif1a/Sqstm1/Gabarapl1	3
GO:0031331	BP	GO:0031331	positive regulation of cellular catabolic process	2025-04-11	431/28943	1.47309e-05	0.00134463	0.000418092	Myc/Hif1a/Bag3/Hspb8	4
GO:0022411	BP	GO:0022411	cellular component disassembly	2025-04-11	439/28943	1.58347e-05	0.00134463	0.000418092	Myc/Hif1a/Sqstm1/Gabarapl1	4
GO:0010508	BP	GO:0010508	positive regulation of autophagy	2025-03-11	152/28943	2.27185e-05	0.00171945	0.000534635	Hif1a/Bag3/Hspb8	3
GO:0016052	BP	GO:0016052	carbohydrate catabolic process	2025-03-11	154/28943	2.36234e-05	0.00171945	0.000534635	Myc/Hif1a/Gabarapl1	3
GO:0046716	BP	GO:0046716	muscle cell cellular homeostasis	2025-02-11	28/28943	4.93709e-05	0.00335393	0.00104285	Hif1a/Bag3	2
GO:0045637	BP	GO:0045637	regulation of myeloid cell differentiation	2025-03-11	226/28943	7.4016e-05	0.00471389	0.00146571	Myc/Hif1a/Rb1	3
GO:1903715	BP	GO:1903715	regulation of aerobic respiration	2025-02-11	36/28943	8.21485e-05	0.00492408	0.00153106	Myc/Hif1a	2
GO:1903320	BP	GO:1903320	regulation of protein modification by small protein conjugation or removal	2025-03-11	252/28943	0.0001022	0.00578567	0.00179896	Sphk1/Hif1a/Sqstm1	3
GO:0045840	BP	GO:0045840	positive regulation of mitotic nuclear division	2025-02-11	44/28943	0.000123149	0.00660466	0.00205362	Sphk1/Rb1	2
GO:0010506	BP	GO:0010506	regulation of autophagy	2025-03-11	285/28943	0.00014703	0.0073771	0.0022938	Hif1a/Bag3/Hspb8	3
GO:0006110	BP	GO:0006110	regulation of glycolytic process	2025-02-11	49/28943	0.000152931	0.0073771	0.0022938	Myc/Hif1a	2
GO:0043618	BP	GO:0043618	regulation of transcription from RNA polymerase II promoter in response to stress	2025-02-11	50/28943	0.00015927	0.0073771	0.0022938	Hif1a/Bag3	2
GO:0060251	BP	GO:0060251	regulation of glial cell proliferation	2025-02-11	52/28943	0.00017233	0.00763498	0.00237398	Myc/Rb1	2
GO:0071496	BP	GO:0071496	cellular response to external stimulus	2025-03-11	308/28943	0.000184836	0.00784783	0.00244016	Zfyve1/Bag3/Gabarapl1	3
GO:0043620	BP	GO:0043620	regulation of DNA-templated transcription in response to stress	2025-02-11	55/28943	0.000192874	0.00786156	0.00244443	Hif1a/Bag3	2
GO:0043388	BP	GO:0043388	positive regulation of DNA binding	2025-02-11	59/28943	0.000222043	0.00803624	0.00249874	Myc/Rb1	2
GO:0043470	BP	GO:0043470	regulation of carbohydrate catabolic process	2025-02-11	60/28943	0.000229652	0.00803624	0.00249874	Myc/Hif1a	2
GO:0051146	BP	GO:0051146	striated muscle cell differentiation	2025-03-11	334/28943	0.000234614	0.00803624	0.00249874	Myc/Rb1/Capn2	3
GO:0015980	BP	GO:0015980	energy derivation by oxidation of organic compounds	2025-03-11	337/28943	0.000240861	0.00803624	0.00249874	Myc/Hif1a/Gabarapl1	3
GO:0051785	BP	GO:0051785	positive regulation of nuclear division	2025-02-11	62/28943	0.00024525	0.00803624	0.00249874	Sphk1/Rb1	2
GO:0010662	BP	GO:0010662	regulation of striated muscle cell apoptotic process	2025-02-11	63/28943	0.000253239	0.00803624	0.00249874	Capn2/Bag3	2
GO:0043457	BP	GO:0043457	regulation of cellular respiration	2025-02-11	63/28943	0.000253239	0.00803624	0.00249874	Myc/Hif1a	2
GO:0060249	BP	GO:0060249	anatomical structure homeostasis	2025-03-11	346/28943	0.000260251	0.00803624	0.00249874	Hif1a/Rb1/Bag3	3
GO:0010658	BP	GO:0010658	striated muscle cell apoptotic process	2025-02-11	67/28943	0.000286455	0.00835224	0.002597	Capn2/Bag3	2
GO:0045787	BP	GO:0045787	positive regulation of cell cycle	2025-03-11	358/28943	0.000287643	0.00835224	0.002597	Sphk1/Myc/Rb1	3
GO:0006879	BP	GO:0006879	cellular iron ion homeostasis	2025-02-11	68/28943	0.000295074	0.00835224	0.002597	Myc/Hif1a	2
GO:0014009	BP	GO:0014009	glial cell proliferation	2025-02-11	71/28943	0.000321687	0.00885944	0.0027547	Myc/Rb1	2
GO:1902895	BP	GO:1902895	positive regulation of miRNA transcription	2025-02-11	72/28943	0.00033081	0.00887092	0.00275827	Myc/Hif1a	2
GO:1903578	BP	GO:1903578	regulation of ATP metabolic process	2025-02-11	75/28943	0.00035893	0.00937821	0.00291601	Myc/Hif1a	2
GO:0010822	BP	GO:0010822	positive regulation of mitochondrion organization	2025-02-11	77/28943	0.000378304	0.00940225	0.00292348	Tnfsf10/Hif1a	2
GO:0048146	BP	GO:0048146	positive regulation of fibroblast proliferation	2025-02-11	77/28943	0.000378304	0.00940225	0.00292348	Sphk1/Myc	2
GO:2000630	BP	GO:2000630	positive regulation of miRNA metabolic process	2025-02-11	78/28943	0.000388179	0.00941797	0.00292837	Myc/Hif1a	2
GO:0045913	BP	GO:0045913	positive regulation of carbohydrate metabolic process	2025-02-11	84/28943	0.000450054	0.0102472	0.00318619	Myc/Hif1a	2
GO:0070228	BP	GO:0070228	regulation of lymphocyte apoptotic process	2025-02-11	85/28943	0.000460803	0.0102472	0.00318619	Myc/Hif1a	2
GO:1902893	BP	GO:1902893	regulation of miRNA transcription	2025-02-11	88/28943	0.000493797	0.0102472	0.00318619	Myc/Hif1a	2
GO:0034620	BP	GO:0034620	cellular response to unfolded protein	2025-02-11	89/28943	0.000505044	0.0102472	0.00318619	Bag3/Hspb8	2
GO:1900542	BP	GO:1900542	regulation of purine nucleotide metabolic process	2025-02-11	89/28943	0.000505044	0.0102472	0.00318619	Myc/Hif1a	2
GO:1903706	BP	GO:1903706	regulation of hemopoiesis	2025-03-11	435/28943	0.000508568	0.0102472	0.00318619	Myc/Hif1a/Rb1	3
GO:0061614	BP	GO:0061614	miRNA transcription	2025-02-11	90/28943	0.000516415	0.0102472	0.00318619	Myc/Hif1a	2
GO:0006096	BP	GO:0006096	glycolytic process	2025-02-11	92/28943	0.00053953	0.0102472	0.00318619	Myc/Hif1a	2
GO:0030099	BP	GO:0030099	myeloid cell differentiation	2025-03-11	445/28943	0.000543404	0.0102472	0.00318619	Myc/Hif1a/Rb1	3
GO:0006757	BP	GO:0006757	ATP generation from ADP	2025-02-11	93/28943	0.000551274	0.0102472	0.00318619	Myc/Hif1a	2
GO:0055072	BP	GO:0055072	iron ion homeostasis	2025-02-11	93/28943	0.000551274	0.0102472	0.00318619	Myc/Hif1a	2
GO:0042692	BP	GO:0042692	muscle cell differentiation	2025-03-11	449/28943	0.000557758	0.0102472	0.00318619	Myc/Rb1/Capn2	3
GO:0070997	BP	GO:0070997	neuron death	2025-03-11	450/28943	0.000561384	0.0102472	0.00318619	Hif1a/Rb1/Capn2	3
GO:0035914	BP	GO:0035914	skeletal muscle cell differentiation	2025-02-11	94/28943	0.000563141	0.0102472	0.00318619	Myc/Rb1	2
GO:0006140	BP	GO:0006140	regulation of nucleotide metabolic process	2025-02-11	95/28943	0.000575132	0.0102818	0.00319695	Myc/Hif1a	2
GO:0050767	BP	GO:0050767	regulation of neurogenesis	2025-03-11	463/28943	0.000609915	0.0106669	0.00331671	Myc/Hif1a/Rb1	3
GO:0006091	BP	GO:0006091	generation of precursor metabolites and energy	2025-03-11	465/28943	0.000617613	0.0106669	0.00331671	Myc/Hif1a/Gabarapl1	3
GO:0046031	BP	GO:0046031	ADP metabolic process	2025-02-11	101/28943	0.000649677	0.0107457	0.00334122	Myc/Hif1a	2
GO:2000628	BP	GO:2000628	regulation of miRNA metabolic process	2025-02-11	102/28943	0.000662533	0.0107457	0.00334122	Myc/Hif1a	2
GO:0010660	BP	GO:0010660	regulation of muscle cell apoptotic process	2025-02-11	103/28943	0.000675512	0.0107457	0.00334122	Capn2/Bag3	2
GO:0000045	BP	GO:0000045	autophagosome assembly	2025-02-11	104/28943	0.000688615	0.0107457	0.00334122	Bag3/Gabarapl1	2
GO:0009135	BP	GO:0009135	purine nucleoside diphosphate metabolic process	2025-02-11	105/28943	0.000701841	0.0107457	0.00334122	Myc/Hif1a	2
GO:0009179	BP	GO:0009179	purine ribonucleoside diphosphate metabolic process	2025-02-11	105/28943	0.000701841	0.0107457	0.00334122	Myc/Hif1a	2
GO:1903829	BP	GO:1903829	positive regulation of protein localization	2025-03-11	493/28943	0.000732015	0.0107457	0.00334122	Hif1a/Sqstm1/Bag3	3
GO:0010657	BP	GO:0010657	muscle cell apoptotic process	2025-02-11	108/28943	0.000742255	0.0107457	0.00334122	Capn2/Bag3	2
GO:0006165	BP	GO:0006165	nucleoside diphosphate phosphorylation	2025-02-11	109/28943	0.000755972	0.0107457	0.00334122	Myc/Hif1a	2
GO:0035967	BP	GO:0035967	cellular response to topologically incorrect protein	2025-02-11	109/28943	0.000755972	0.0107457	0.00334122	Bag3/Hspb8	2
GO:0048661	BP	GO:0048661	positive regulation of smooth muscle cell proliferation	2025-02-11	109/28943	0.000755972	0.0107457	0.00334122	Myc/Hif1a	2
GO:0070227	BP	GO:0070227	lymphocyte apoptotic process	2025-02-11	109/28943	0.000755972	0.0107457	0.00334122	Myc/Hif1a	2
GO:0046916	BP	GO:0046916	cellular transition metal ion homeostasis	2025-02-11	110/28943	0.000769812	0.0107457	0.00334122	Myc/Hif1a	2
GO:0071456	BP	GO:0071456	cellular response to hypoxia	2025-02-11	110/28943	0.000769812	0.0107457	0.00334122	Myc/Hif1a	2
GO:1905037	BP	GO:1905037	autophagosome organization	2025-02-11	112/28943	0.00079786	0.0108881	0.00338549	Bag3/Gabarapl1	2
GO:0045639	BP	GO:0045639	positive regulation of myeloid cell differentiation	2025-02-11	113/28943	0.000812067	0.0108881	0.00338549	Hif1a/Rb1	2
GO:0046939	BP	GO:0046939	nucleotide phosphorylation	2025-02-11	113/28943	0.000812067	0.0108881	0.00338549	Myc/Hif1a	2
GO:0007088	BP	GO:0007088	regulation of mitotic nuclear division	2025-02-11	115/28943	0.000840849	0.0110832	0.00344613	Sphk1/Rb1	2
GO:0006986	BP	GO:0006986	response to unfolded protein	2025-02-11	116/28943	0.000855424	0.0110832	0.00344613	Bag3/Hspb8	2
GO:0009185	BP	GO:0009185	ribonucleoside diphosphate metabolic process	2025-02-11	117/28943	0.00087012	0.0110832	0.00344613	Myc/Hif1a	2
GO:0010586	BP	GO:0010586	miRNA metabolic process	2025-02-11	117/28943	0.00087012	0.0110832	0.00344613	Myc/Hif1a	2
GO:2000106	BP	GO:2000106	regulation of leukocyte apoptotic process	2025-02-11	119/28943	0.000899879	0.0113207	0.00352	Myc/Hif1a	2
GO:0002062	BP	GO:0002062	chondrocyte differentiation	2025-02-11	120/28943	0.000914942	0.0113698	0.00353527	Hif1a/Rb1	2
GO:0006090	BP	GO:0006090	pyruvate metabolic process	2025-02-11	121/28943	0.000930126	0.0114193	0.00355064	Myc/Hif1a	2
GO:0048145	BP	GO:0048145	regulation of fibroblast proliferation	2025-02-11	124/28943	0.000976409	0.0118448	0.00368295	Sphk1/Myc	2
GO:0043280	BP	GO:0043280	positive regulation of cysteine-type endopeptidase activity involved in apoptotic process	2025-02-11	127/28943	0.00102379	0.0121307	0.00377184	Tnfsf10/Myc	2
GO:0051101	BP	GO:0051101	regulation of DNA binding	2025-02-11	127/28943	0.00102379	0.0121307	0.00377184	Myc/Rb1	2
GO:0048565	BP	GO:0048565	digestive tract development	2025-02-11	128/28943	0.00103982	0.0121791	0.00378689	Hif1a/Rb1	2
GO:0045931	BP	GO:0045931	positive regulation of mitotic cell cycle	2025-02-11	133/28943	0.00112181	0.0129901	0.00403906	Sphk1/Rb1	2
GO:0014013	BP	GO:0014013	regulation of gliogenesis	2025-02-11	135/28943	0.00115546	0.0130342	0.00405279	Myc/Rb1	2
GO:0036294	BP	GO:0036294	cellular response to decreased oxygen levels	2025-02-11	135/28943	0.00115546	0.0130342	0.00405279	Myc/Hif1a	2
GO:0009132	BP	GO:0009132	nucleoside diphosphate metabolic process	2025-02-11	136/28943	0.00117246	0.0130342	0.00405279	Myc/Hif1a	2
GO:0001959	BP	GO:0001959	regulation of cytokine-mediated signaling pathway	2025-02-11	137/28943	0.00118958	0.0130342	0.00405279	Sphk1/Hif1a	2
GO:0055076	BP	GO:0055076	transition metal ion homeostasis	2025-02-11	137/28943	0.00118958	0.0130342	0.00405279	Myc/Hif1a	2
GO:0035966	BP	GO:0035966	response to topologically incorrect protein	2025-02-11	138/28943	0.00120682	0.0130825	0.0040678	Bag3/Hspb8	2
GO:0055123	BP	GO:0055123	digestive system development	2025-02-11	141/28943	0.00125928	0.0135074	0.00419992	Hif1a/Rb1	2
GO:0002761	BP	GO:0002761	regulation of myeloid leukocyte differentiation	2025-02-11	143/28943	0.00129485	0.0136026	0.00422951	Myc/Rb1	2
GO:0014902	BP	GO:0014902	myotube differentiation	2025-02-11	143/28943	0.00129485	0.0136026	0.00422951	Myc/Capn2	2
GO:0048144	BP	GO:0048144	fibroblast proliferation	2025-02-11	145/28943	0.0013309	0.0137608	0.0042787	Sphk1/Myc	2
GO:0010821	BP	GO:0010821	regulation of mitochondrion organization	2025-02-11	146/28943	0.0013491	0.0137608	0.0042787	Tnfsf10/Hif1a	2
GO:0051783	BP	GO:0051783	regulation of nuclear division	2025-02-11	147/28943	0.00136743	0.0137608	0.0042787	Sphk1/Rb1	2
GO:0060759	BP	GO:0060759	regulation of response to cytokine stimulus	2025-02-11	147/28943	0.00136743	0.0137608	0.0042787	Sphk1/Hif1a	2
GO:0071887	BP	GO:0071887	leukocyte apoptotic process	2025-02-11	148/28943	0.00138587	0.0137608	0.0042787	Myc/Hif1a	2
GO:0043467	BP	GO:0043467	regulation of generation of precursor metabolites and energy	2025-02-11	149/28943	0.00140444	0.0137608	0.0042787	Myc/Hif1a	2
GO:2001056	BP	GO:2001056	positive regulation of cysteine-type endopeptidase activity	2025-02-11	149/28943	0.00140444	0.0137608	0.0042787	Tnfsf10/Myc	2
GO:0030218	BP	GO:0030218	erythrocyte differentiation	2025-02-11	150/28943	0.00142312	0.013811	0.00429433	Hif1a/Rb1	2
GO:0071453	BP	GO:0071453	cellular response to oxygen levels	2025-02-11	151/28943	0.00144192	0.0138615	0.00431002	Myc/Hif1a	2
GO:2001235	BP	GO:2001235	positive regulation of apoptotic signaling pathway	2025-02-11	156/28943	0.00153773	0.0146444	0.00455343	Tnfsf10/Myc	2
GO:0034101	BP	GO:0034101	erythrocyte homeostasis	2025-02-11	162/28943	0.00165663	0.0156306	0.00486008	Hif1a/Rb1	2
GO:0010950	BP	GO:0010950	positive regulation of endopeptidase activity	2025-02-11	170/28943	0.00182179	0.0169188	0.00526063	Tnfsf10/Myc	2
GO:0009267	BP	GO:0009267	cellular response to starvation	2025-02-11	171/28943	0.00184297	0.0169188	0.00526063	Zfyve1/Gabarapl1	2
GO:0071466	BP	GO:0071466	cellular response to xenobiotic stimulus	2025-02-11	171/28943	0.00184297	0.0169188	0.00526063	Myc/Rb1	2
GO:0062013	BP	GO:0062013	positive regulation of small molecule metabolic process	2025-02-11	172/28943	0.00186426	0.0169615	0.00527391	Myc/Hif1a	2
GO:0006606	BP	GO:0006606	protein import into nucleus	2025-02-11	177/28943	0.00197251	0.0174781	0.00543455	Sqstm1/Bag3	2
GO:0009612	BP	GO:0009612	response to mechanical stimulus	2025-02-11	177/28943	0.00197251	0.0174781	0.00543455	Myc/Bag3	2
GO:2001242	BP	GO:2001242	regulation of intrinsic apoptotic signaling pathway	2025-02-11	177/28943	0.00197251	0.0174781	0.00543455	Myc/Hif1a	2
GO:0010952	BP	GO:0010952	positive regulation of peptidase activity	2025-02-11	180/28943	0.00203886	0.0178427	0.0055479	Tnfsf10/Myc	2
GO:0051170	BP	GO:0051170	import into nucleus	2025-02-11	181/28943	0.00206122	0.0178427	0.0055479	Sqstm1/Bag3	2
GO:0045766	BP	GO:0045766	positive regulation of angiogenesis	2025-02-11	182/28943	0.00208369	0.0178427	0.0055479	Sphk1/Hif1a	2
GO:1904018	BP	GO:1904018	positive regulation of vasculature development	2025-02-11	182/28943	0.00208369	0.0178427	0.0055479	Sphk1/Hif1a	2
GO:0048660	BP	GO:0048660	regulation of smooth muscle cell proliferation	2025-02-11	185/28943	0.0021518	0.0181214	0.00563455	Myc/Hif1a	2
GO:0071897	BP	GO:0071897	DNA biosynthetic process	2025-02-11	185/28943	0.0021518	0.0181214	0.00563455	Sphk1/Myc	2
GO:0009060	BP	GO:0009060	aerobic respiration	2025-02-11	187/28943	0.00219779	0.018357	0.00570781	Myc/Hif1a	2
GO:0001659	BP	GO:0001659	temperature homeostasis	2025-02-11	189/28943	0.00224425	0.0185295	0.00576145	Rb1/Sqstm1	2
GO:0000302	BP	GO:0000302	response to reactive oxygen species	2025-02-11	190/28943	0.00226766	0.0185295	0.00576145	Sphk1/Hif1a	2
GO:0042594	BP	GO:0042594	response to starvation	2025-02-11	191/28943	0.00229118	0.0185295	0.00576145	Zfyve1/Gabarapl1	2
GO:0043122	BP	GO:0043122	regulation of I-kappaB kinase/NF-kappaB signaling	2025-02-11	191/28943	0.00229118	0.0185295	0.00576145	Tnfsf10/Sqstm1	2
GO:0048659	BP	GO:0048659	smooth muscle cell proliferation	2025-02-11	192/28943	0.00231482	0.0185732	0.00577505	Myc/Hif1a	2
GO:0051099	BP	GO:0051099	positive regulation of binding	2025-02-11	194/28943	0.00236244	0.0188072	0.00584782	Myc/Rb1	2
GO:0007033	BP	GO:0007033	vacuole organization	2025-02-11	197/28943	0.00243475	0.0192326	0.00598008	Bag3/Gabarapl1	2
GO:0006109	BP	GO:0006109	regulation of carbohydrate metabolic process	2025-02-11	199/28943	0.00248353	0.0194671	0.00605298	Myc/Hif1a	2
GO:0046890	BP	GO:0046890	regulation of lipid biosynthetic process	2025-02-11	205/28943	0.00263266	0.0204785	0.00636747	Sphk1/Capn2	2
GO:0002262	BP	GO:0002262	myeloid cell homeostasis	2025-02-11	206/28943	0.00265792	0.0205184	0.00637987	Hif1a/Rb1	2
GO:0007519	BP	GO:0007519	skeletal muscle tissue development	2025-02-11	207/28943	0.0026833	0.0205585	0.00639235	Myc/Rb1	2
GO:0043281	BP	GO:0043281	regulation of cysteine-type endopeptidase activity involved in apoptotic process	2025-02-11	211/28943	0.00278595	0.0211857	0.00658736	Tnfsf10/Myc	2
GO:0031669	BP	GO:0031669	cellular response to nutrient levels	2025-02-11	213/28943	0.00283796	0.0214214	0.00666064	Zfyve1/Gabarapl1	2
GO:0051216	BP	GO:0051216	cartilage development	2025-02-11	216/28943	0.00291684	0.0218121	0.00678213	Hif1a/Rb1	2
GO:0006006	BP	GO:0006006	glucose metabolic process	2025-02-11	217/28943	0.00294337	0.0218121	0.00678213	Myc/Hif1a	2
GO:0031396	BP	GO:0031396	regulation of protein ubiquitination	2025-02-11	218/28943	0.00297001	0.0218121	0.00678213	Sphk1/Sqstm1	2
GO:0001666	BP	GO:0001666	response to hypoxia	2025-02-11	219/28943	0.00299676	0.0218121	0.00678213	Myc/Hif1a	2
GO:0060538	BP	GO:0060538	skeletal muscle organ development	2025-02-11	219/28943	0.00299676	0.0218121	0.00678213	Myc/Rb1	2
GO:0048469	BP	GO:0048469	cell maturation	2025-02-11	221/28943	0.0030506	0.0220466	0.00685503	Hif1a/Rb1	2
GO:0046034	BP	GO:0046034	ATP metabolic process	2025-02-11	224/28943	0.00313223	0.0224771	0.00698889	Myc/Hif1a	2
GO:0000082	BP	GO:0000082	G1/S transition of mitotic cell cycle	2025-02-11	230/28943	0.00329856	0.0233419	0.00725779	Myc/Rb1	2
GO:0007249	BP	GO:0007249	I-kappaB kinase/NF-kappaB signaling	2025-02-11	230/28943	0.00329856	0.0233419	0.00725779	Tnfsf10/Sqstm1	2
GO:0097191	BP	GO:0097191	extrinsic apoptotic signaling pathway	2025-02-11	238/28943	0.00352668	0.0246291	0.00765803	Tnfsf10/Bag3	2
GO:0033044	BP	GO:0033044	regulation of chromosome organization	2025-02-11	241/28943	0.00361409	0.0246291	0.00765803	Myc/Rb1	2
GO:2001234	BP	GO:2001234	negative regulation of apoptotic signaling pathway	2025-02-11	241/28943	0.00361409	0.0246291	0.00765803	Hif1a/Rb1	2
GO:2000116	BP	GO:2000116	regulation of cysteine-type endopeptidase activity	2025-02-11	243/28943	0.00367292	0.0246291	0.00765803	Tnfsf10/Myc	2
GO:0031668	BP	GO:0031668	cellular response to extracellular stimulus	2025-02-11	245/28943	0.00373221	0.0246291	0.00765803	Zfyve1/Gabarapl1	2
GO:0045333	BP	GO:0045333	cellular respiration	2025-02-11	245/28943	0.00373221	0.0246291	0.00765803	Myc/Hif1a	2
GO:0002573	BP	GO:0002573	myeloid leukocyte differentiation	2025-02-11	246/28943	0.00376202	0.0246291	0.00765803	Myc/Rb1	2
GO:0036293	BP	GO:0036293	response to decreased oxygen levels	2025-02-11	246/28943	0.00376202	0.0246291	0.00765803	Myc/Hif1a	2
GO:0036480	BP	GO:0036480	neuron intrinsic apoptotic signaling pathway in response to oxidative stress	2025-01-11	10/28943	0.00379467	0.0246291	0.00765803	Hif1a	1
GO:0072203	BP	GO:0072203	cell proliferation involved in metanephros development	2025-01-11	10/28943	0.00379467	0.0246291	0.00765803	Myc	1
GO:0150172	BP	GO:0150172	regulation of phosphatidylcholine metabolic process	2025-01-11	10/28943	0.00379467	0.0246291	0.00765803	Capn2	1
GO:1901724	BP	GO:1901724	positive regulation of cell proliferation involved in kidney development	2025-01-11	10/28943	0.00379467	0.0246291	0.00765803	Myc	1
GO:1903376	BP	GO:1903376	regulation of oxidative stress-induced neuron intrinsic apoptotic signaling pathway	2025-01-11	10/28943	0.00379467	0.0246291	0.00765803	Hif1a	1
GO:0009205	BP	GO:0009205	purine ribonucleoside triphosphate metabolic process	2025-02-11	251/28943	0.00391276	0.0249383	0.00775417	Myc/Hif1a	2
GO:0019318	BP	GO:0019318	hexose metabolic process	2025-02-11	253/28943	0.00397384	0.0249383	0.00775417	Myc/Hif1a	2
GO:0009144	BP	GO:0009144	purine nucleoside triphosphate metabolic process	2025-02-11	257/28943	0.00409735	0.0249383	0.00775417	Myc/Hif1a	2
GO:0009199	BP	GO:0009199	ribonucleoside triphosphate metabolic process	2025-02-11	257/28943	0.00409735	0.0249383	0.00775417	Myc/Hif1a	2
GO:0044843	BP	GO:0044843	cell cycle G1/S phase transition	2025-02-11	257/28943	0.00409735	0.0249383	0.00775417	Myc/Rb1	2
GO:0002246	BP	GO:0002246	wound healing involved in inflammatory response	2025-01-11	11/28943	0.00417342	0.0249383	0.00775417	Hif1a	1
GO:0043353	BP	GO:0043353	enucleate erythrocyte differentiation	2025-01-11	11/28943	0.00417342	0.0249383	0.00775417	Rb1	1
GO:0072075	BP	GO:0072075	metanephric mesenchyme development	2025-01-11	11/28943	0.00417342	0.0249383	0.00775417	Myc	1
GO:1903599	BP	GO:1903599	positive regulation of autophagy of mitochondrion	2025-01-11	11/28943	0.00417342	0.0249383	0.00775417	Hif1a	1
GO:1905634	BP	GO:1905634	regulation of protein localization to chromatin	2025-01-11	11/28943	0.00417342	0.0249383	0.00775417	Rb1	1
GO:2000434	BP	GO:2000434	regulation of protein neddylation	2025-01-11	11/28943	0.00417342	0.0249383	0.00775417	Hif1a	1
GO:0045926	BP	GO:0045926	negative regulation of growth	2025-02-11	261/28943	0.00422263	0.0249383	0.00775417	Hif1a/Rb1	2
GO:0033002	BP	GO:0033002	muscle cell proliferation	2025-02-11	266/28943	0.00438174	0.0249383	0.00775417	Myc/Hif1a	2
GO:0005996	BP	GO:0005996	monosaccharide metabolic process	2025-02-11	268/28943	0.00444616	0.0249383	0.00775417	Myc/Hif1a	2
GO:0090068	BP	GO:0090068	positive regulation of cell cycle process	2025-02-11	269/28943	0.00447854	0.0249383	0.00775417	Sphk1/Rb1	2
GO:0034088	BP	GO:0034088	maintenance of mitotic sister chromatid cohesion	2025-01-11	12/28943	0.00455203	0.0249383	0.00775417	Rb1	1
GO:0043619	BP	GO:0043619	regulation of transcription from RNA polymerase II promoter in response to oxidative stress	2025-01-11	12/28943	0.00455203	0.0249383	0.00775417	Hif1a	1
GO:0061418	BP	GO:0061418	regulation of transcription from RNA polymerase II promoter in response to hypoxia	2025-01-11	12/28943	0.00455203	0.0249383	0.00775417	Hif1a	1
GO:0061635	BP	GO:0061635	regulation of protein complex stability	2025-01-11	12/28943	0.00455203	0.0249383	0.00775417	Sqstm1	1
GO:0061684	BP	GO:0061684	chaperone-mediated autophagy	2025-01-11	12/28943	0.00455203	0.0249383	0.00775417	Bag3	1
GO:0070244	BP	GO:0070244	negative regulation of thymocyte apoptotic process	2025-01-11	12/28943	0.00455203	0.0249383	0.00775417	Hif1a	1
GO:0071073	BP	GO:0071073	positive regulation of phospholipid biosynthetic process	2025-01-11	12/28943	0.00455203	0.0249383	0.00775417	Capn2	1
GO:0090184	BP	GO:0090184	positive regulation of kidney development	2025-01-11	12/28943	0.00455203	0.0249383	0.00775417	Myc	1
GO:0097201	BP	GO:0097201	negative regulation of transcription from RNA polymerase II promoter in response to stress	2025-01-11	12/28943	0.00455203	0.0249383	0.00775417	Bag3	1
GO:0140042	BP	GO:0140042	lipid droplet formation	2025-01-11	12/28943	0.00455203	0.0249383	0.00775417	Zfyve1	1
GO:1902947	BP	GO:1902947	regulation of tau-protein kinase activity	2025-01-11	12/28943	0.00455203	0.0249383	0.00775417	Rb1	1
GO:1904672	BP	GO:1904672	regulation of somatic stem cell population maintenance	2025-01-11	12/28943	0.00455203	0.0249383	0.00775417	Myc	1
GO:2000303	BP	GO:2000303	regulation of ceramide biosynthetic process	2025-01-11	12/28943	0.00455203	0.0249383	0.00775417	Sphk1	1
GO:2001054	BP	GO:2001054	negative regulation of mesenchymal cell apoptotic process	2025-01-11	12/28943	0.00455203	0.0249383	0.00775417	Hif1a	1
GO:0034599	BP	GO:0034599	cellular response to oxidative stress	2025-02-11	273/28943	0.00460915	0.0251161	0.00780947	Sphk1/Hif1a	2
GO:0009141	BP	GO:0009141	nucleoside triphosphate metabolic process	2025-02-11	275/28943	0.00467511	0.0253401	0.00787911	Myc/Hif1a	2
GO:0002069	BP	GO:0002069	columnar/cuboidal epithelial cell maturation	2025-01-11	13/28943	0.00493051	0.0260321	0.00809427	Hif1a	1
GO:0030949	BP	GO:0030949	positive regulation of vascular endothelial growth factor receptor signaling pathway	2025-01-11	13/28943	0.00493051	0.0260321	0.00809427	Hif1a	1
GO:0034086	BP	GO:0034086	maintenance of sister chromatid cohesion	2025-01-11	13/28943	0.00493051	0.0260321	0.00809427	Rb1	1
GO:0090520	BP	GO:0090520	sphingolipid mediated signaling pathway	2025-01-11	13/28943	0.00493051	0.0260321	0.00809427	Sphk1	1
GO:0097709	BP	GO:0097709	connective tissue replacement	2025-01-11	13/28943	0.00493051	0.0260321	0.00809427	Hif1a	1
GO:0016485	BP	GO:0016485	protein processing	2025-02-11	285/28943	0.00501154	0.0263235	0.00818489	Myc/Capn2	2
GO:0001866	BP	GO:0001866	NK T cell proliferation	2025-01-11	14/28943	0.00530887	0.0267809	0.00832709	Myc	1
GO:0045842	BP	GO:0045842	positive regulation of mitotic metaphase/anaphase transition	2025-01-11	14/28943	0.00530887	0.0267809	0.00832709	Rb1	1
GO:0045906	BP	GO:0045906	negative regulation of vasoconstriction	2025-01-11	14/28943	0.00530887	0.0267809	0.00832709	Hif1a	1
GO:0046512	BP	GO:0046512	sphingosine biosynthetic process	2025-01-11	14/28943	0.00530887	0.0267809	0.00832709	Sphk1	1
GO:0046520	BP	GO:0046520	sphingoid biosynthetic process	2025-01-11	14/28943	0.00530887	0.0267809	0.00832709	Sphk1	1
GO:0046886	BP	GO:0046886	positive regulation of hormone biosynthetic process	2025-01-11	14/28943	0.00530887	0.0267809	0.00832709	Hif1a	1
GO:0090153	BP	GO:0090153	regulation of sphingolipid biosynthetic process	2025-01-11	14/28943	0.00530887	0.0267809	0.00832709	Sphk1	1
GO:1905038	BP	GO:1905038	regulation of membrane lipid metabolic process	2025-01-11	14/28943	0.00530887	0.0267809	0.00832709	Sphk1	1
GO:0071695	BP	GO:0071695	anatomical structure maturation	2025-02-11	299/28943	0.00550092	0.0273512	0.00850441	Hif1a/Rb1	2
GO:0044262	BP	GO:0044262	cellular carbohydrate metabolic process	2025-02-11	302/28943	0.00560856	0.0273512	0.00850441	Hif1a/Gabarapl1	2
GO:0061448	BP	GO:0061448	connective tissue development	2025-02-11	302/28943	0.00560856	0.0273512	0.00850441	Hif1a/Rb1	2
GO:0060485	BP	GO:0060485	mesenchyme development	2025-02-11	304/28943	0.00568086	0.0273512	0.00850441	Myc/Hif1a	2
GO:0051782	BP	GO:0051782	negative regulation of cell division	2025-01-11	15/28943	0.00568709	0.0273512	0.00850441	Myc	1
GO:0070341	BP	GO:0070341	fat cell proliferation	2025-01-11	15/28943	0.00568709	0.0273512	0.00850441	Sqstm1	1
GO:0072074	BP	GO:0072074	kidney mesenchyme development	2025-01-11	15/28943	0.00568709	0.0273512	0.00850441	Myc	1
GO:1902101	BP	GO:1902101	positive regulation of metaphase/anaphase transition of cell cycle	2025-01-11	15/28943	0.00568709	0.0273512	0.00850441	Rb1	1
GO:2001053	BP	GO:2001053	regulation of mesenchymal cell apoptotic process	2025-01-11	15/28943	0.00568709	0.0273512	0.00850441	Hif1a	1
GO:0050769	BP	GO:0050769	positive regulation of neurogenesis	2025-02-11	305/28943	0.00571717	0.0273512	0.00850441	Myc/Hif1a	2
GO:0070482	BP	GO:0070482	response to oxygen levels	2025-02-11	305/28943	0.00571717	0.0273512	0.00850441	Myc/Hif1a	2
GO:0045765	BP	GO:0045765	regulation of angiogenesis	2025-02-11	308/28943	0.00582675	0.0277452	0.00862692	Sphk1/Hif1a	2
GO:0140014	BP	GO:0140014	mitotic nuclear division	2025-02-11	309/28943	0.0058635	0.0277903	0.00864094	Sphk1/Rb1	2
GO:0097193	BP	GO:0097193	intrinsic apoptotic signaling pathway	2025-02-11	310/28943	0.00590035	0.0278354	0.008655	Myc/Hif1a	2
GO:1901342	BP	GO:1901342	regulation of vasculature development	2025-02-11	312/28943	0.00597437	0.0279657	0.0086955	Sphk1/Hif1a	2
GO:0042541	BP	GO:0042541	hemoglobin biosynthetic process	2025-01-11	16/28943	0.00606518	0.0279657	0.0086955	Hif1a	1
GO:0045651	BP	GO:0045651	positive regulation of macrophage differentiation	2025-01-11	16/28943	0.00606518	0.0279657	0.0086955	Rb1	1
GO:1901722	BP	GO:1901722	regulation of cell proliferation involved in kidney development	2025-01-11	16/28943	0.00606518	0.0279657	0.0086955	Myc	1
GO:1903978	BP	GO:1903978	regulation of microglial cell activation	2025-01-11	16/28943	0.00606518	0.0279657	0.0086955	Sphk1	1
GO:0009410	BP	GO:0009410	response to xenobiotic stimulus	2025-02-11	317/28943	0.00616132	0.028281	0.00879354	Myc/Rb1	2
GO:0034504	BP	GO:0034504	protein localization to nucleus	2025-02-11	320/28943	0.00627477	0.0284224	0.00883749	Sqstm1/Bag3	2
GO:0051222	BP	GO:0051222	positive regulation of protein transport	2025-02-11	321/28943	0.0063128	0.0284224	0.00883749	Hif1a/Bag3	2
GO:0090596	BP	GO:0090596	sensory organ morphogenesis	2025-02-11	321/28943	0.0063128	0.0284224	0.00883749	Myc/Hif1a	2
GO:0016050	BP	GO:0016050	vesicle organization	2025-02-11	323/28943	0.00638919	0.0284224	0.00883749	Sphk1/Sqstm1	2
GO:0019896	BP	GO:0019896	axonal transport of mitochondrion	2025-01-11	17/28943	0.00644314	0.0284224	0.00883749	Hif1a	1
GO:0045655	BP	GO:0045655	regulation of monocyte differentiation	2025-01-11	17/28943	0.00644314	0.0284224	0.00883749	Myc	1
GO:0097152	BP	GO:0097152	mesenchymal cell apoptotic process	2025-01-11	17/28943	0.00644314	0.0284224	0.00883749	Hif1a	1
GO:1902176	BP	GO:1902176	negative regulation of oxidative stress-induced intrinsic apoptotic signaling pathway	2025-01-11	17/28943	0.00644314	0.0284224	0.00883749	Hif1a	1
GO:2001171	BP	GO:2001171	positive regulation of ATP biosynthetic process	2025-01-11	17/28943	0.00644314	0.0284224	0.00883749	Myc	1
GO:0051402	BP	GO:0051402	neuron apoptotic process	2025-02-11	329/28943	0.00662089	0.0290806	0.00904215	Hif1a/Rb1	2
GO:0006338	BP	GO:0006338	chromatin remodeling	2025-02-11	330/28943	0.00665989	0.0290819	0.00904256	Myc/Rb1	2
GO:0048562	BP	GO:0048562	embryonic organ morphogenesis	2025-02-11	333/28943	0.00677749	0.0290819	0.00904256	Myc/Hif1a	2
GO:0000083	BP	GO:0000083	regulation of transcription involved in G1/S transition of mitotic cell cycle	2025-01-11	18/28943	0.00682097	0.0290819	0.00904256	Rb1	1
GO:0010918	BP	GO:0010918	positive regulation of mitochondrial membrane potential	2025-01-11	18/28943	0.00682097	0.0290819	0.00904256	Myc	1
GO:0060644	BP	GO:0060644	mammary gland epithelial cell differentiation	2025-01-11	18/28943	0.00682097	0.0290819	0.00904256	Hif1a	1
GO:1901970	BP	GO:1901970	positive regulation of mitotic sister chromatid separation	2025-01-11	18/28943	0.00682097	0.0290819	0.00904256	Rb1	1
GO:1903727	BP	GO:1903727	positive regulation of phospholipid metabolic process	2025-01-11	18/28943	0.00682097	0.0290819	0.00904256	Capn2	1
GO:0050806	BP	GO:0050806	positive regulation of synaptic transmission	2025-02-11	335/28943	0.00685643	0.0291113	0.00905169	Sphk1/Sqstm1	2
GO:1904951	BP	GO:1904951	positive regulation of establishment of protein localization	2025-02-11	337/28943	0.00693579	0.029326	0.00911846	Hif1a/Bag3	2
GO:0062197	BP	GO:0062197	cellular response to chemical stress	2025-02-11	340/28943	0.00705562	0.0293418	0.00912337	Sphk1/Hif1a	2
GO:0032986	BP	GO:0032986	protein-DNA complex disassembly	2025-01-11	19/28943	0.00719867	0.0293418	0.00912337	Myc	1
GO:0035457	BP	GO:0035457	cellular response to interferon-alpha	2025-01-11	19/28943	0.00719867	0.0293418	0.00912337	Myc	1
GO:0046827	BP	GO:0046827	positive regulation of protein export from nucleus	2025-01-11	19/28943	0.00719867	0.0293418	0.00912337	Bag3	1
GO:0051132	BP	GO:0051132	NK T cell activation	2025-01-11	19/28943	0.00719867	0.0293418	0.00912337	Myc	1
GO:0060576	BP	GO:0060576	intestinal epithelial cell development	2025-01-11	19/28943	0.00719867	0.0293418	0.00912337	Hif1a	1
GO:0070243	BP	GO:0070243	regulation of thymocyte apoptotic process	2025-01-11	19/28943	0.00719867	0.0293418	0.00912337	Hif1a	1
GO:1901741	BP	GO:1901741	positive regulation of myoblast fusion	2025-01-11	19/28943	0.00719867	0.0293418	0.00912337	Capn2	1
GO:1903214	BP	GO:1903214	regulation of protein targeting to mitochondrion	2025-01-11	19/28943	0.00719867	0.0293418	0.00912337	Bag3	1
GO:0006913	BP	GO:0006913	nucleocytoplasmic transport	2025-02-11	347/28943	0.00733892	0.0294386	0.00915348	Sqstm1/Bag3	2
GO:0051169	BP	GO:0051169	nuclear transport	2025-02-11	347/28943	0.00733892	0.0294386	0.00915348	Sqstm1/Bag3	2
GO:1902105	BP	GO:1902105	regulation of leukocyte differentiation	2025-02-11	349/28943	0.0074208	0.0294386	0.00915348	Myc/Rb1	2
GO:0001956	BP	GO:0001956	positive regulation of neurotransmitter secretion	2025-01-11	20/28943	0.00757624	0.0294386	0.00915348	Sphk1	1
GO:0006670	BP	GO:0006670	sphingosine metabolic process	2025-01-11	20/28943	0.00757624	0.0294386	0.00915348	Sphk1	1
GO:0007063	BP	GO:0007063	regulation of sister chromatid cohesion	2025-01-11	20/28943	0.00757624	0.0294386	0.00915348	Rb1	1
GO:0030502	BP	GO:0030502	negative regulation of bone mineralization	2025-01-11	20/28943	0.00757624	0.0294386	0.00915348	Hif1a	1
GO:0034349	BP	GO:0034349	glial cell apoptotic process	2025-01-11	20/28943	0.00757624	0.0294386	0.00915348	Rb1	1
GO:0090594	BP	GO:0090594	inflammatory response to wounding	2025-01-11	20/28943	0.00757624	0.0294386	0.00915348	Hif1a	1
GO:0021700	BP	GO:0021700	developmental maturation	2025-02-11	355/28943	0.00766898	0.0294386	0.00915348	Hif1a/Rb1	2
GO:0045862	BP	GO:0045862	positive regulation of proteolysis	2025-02-11	357/28943	0.00775254	0.0294386	0.00915348	Tnfsf10/Myc	2
GO:0052548	BP	GO:0052548	regulation of endopeptidase activity	2025-02-11	361/28943	0.00792092	0.0294386	0.00915348	Tnfsf10/Myc	2
GO:0006089	BP	GO:0006089	lactate metabolic process	2025-01-11	21/28943	0.00795368	0.0294386	0.00915348	Hif1a	1
GO:0045116	BP	GO:0045116	protein neddylation	2025-01-11	21/28943	0.00795368	0.0294386	0.00915348	Hif1a	1
GO:0045722	BP	GO:0045722	positive regulation of gluconeogenesis	2025-01-11	21/28943	0.00795368	0.0294386	0.00915348	Hif1a	1
GO:0045821	BP	GO:0045821	positive regulation of glycolytic process	2025-01-11	21/28943	0.00795368	0.0294386	0.00915348	Myc	1
GO:0046325	BP	GO:0046325	negative regulation of glucose import	2025-01-11	21/28943	0.00795368	0.0294386	0.00915348	Myc	1
GO:0070230	BP	GO:0070230	positive regulation of lymphocyte apoptotic process	2025-01-11	21/28943	0.00795368	0.0294386	0.00915348	Myc	1
GO:0071071	BP	GO:0071071	regulation of phospholipid biosynthetic process	2025-01-11	21/28943	0.00795368	0.0294386	0.00915348	Capn2	1
GO:0042063	BP	GO:0042063	gliogenesis	2025-02-11	363/28943	0.00800573	0.0294386	0.00915348	Myc/Rb1	2
GO:1903532	BP	GO:1903532	positive regulation of secretion by cell	2025-02-11	365/28943	0.00809096	0.0294386	0.00915348	Sphk1/Hif1a	2
GO:0051962	BP	GO:0051962	positive regulation of nervous system development	2025-02-11	366/28943	0.00813373	0.0294386	0.00915348	Myc/Hif1a	2
GO:0050727	BP	GO:0050727	regulation of inflammatory response	2025-02-11	367/28943	0.0081766	0.0294386	0.00915348	Sphk1/Rb1	2
GO:0051604	BP	GO:0051604	protein maturation	2025-02-11	367/28943	0.0081766	0.0294386	0.00915348	Myc/Capn2	2
GO:0062012	BP	GO:0062012	regulation of small molecule metabolic process	2025-02-11	368/28943	0.00821958	0.0294386	0.00915348	Myc/Hif1a	2
GO:0003180	BP	GO:0003180	aortic valve morphogenesis	2025-01-11	22/28943	0.00833099	0.0294386	0.00915348	Rb1	1
GO:0006656	BP	GO:0006656	phosphatidylcholine biosynthetic process	2025-01-11	22/28943	0.00833099	0.0294386	0.00915348	Capn2	1
GO:0030810	BP	GO:0030810	positive regulation of nucleotide biosynthetic process	2025-01-11	22/28943	0.00833099	0.0294386	0.00915348	Myc	1
GO:0034312	BP	GO:0034312	diol biosynthetic process	2025-01-11	22/28943	0.00833099	0.0294386	0.00915348	Sphk1	1
GO:0045649	BP	GO:0045649	regulation of macrophage differentiation	2025-01-11	22/28943	0.00833099	0.0294386	0.00915348	Rb1	1
GO:0046519	BP	GO:0046519	sphingoid metabolic process	2025-01-11	22/28943	0.00833099	0.0294386	0.00915348	Sphk1	1
GO:0050910	BP	GO:0050910	detection of mechanical stimulus involved in sensory perception of sound	2025-01-11	22/28943	0.00833099	0.0294386	0.00915348	Myc	1
GO:0060253	BP	GO:0060253	negative regulation of glial cell proliferation	2025-01-11	22/28943	0.00833099	0.0294386	0.00915348	Rb1	1
GO:0060749	BP	GO:0060749	mammary gland alveolus development	2025-01-11	22/28943	0.00833099	0.0294386	0.00915348	Hif1a	1
GO:0061377	BP	GO:0061377	mammary gland lobule development	2025-01-11	22/28943	0.00833099	0.0294386	0.00915348	Hif1a	1
GO:0072111	BP	GO:0072111	cell proliferation involved in kidney development	2025-01-11	22/28943	0.00833099	0.0294386	0.00915348	Myc	1
GO:1900373	BP	GO:1900373	positive regulation of purine nucleotide biosynthetic process	2025-01-11	22/28943	0.00833099	0.0294386	0.00915348	Myc	1
GO:1901522	BP	GO:1901522	positive regulation of transcription from RNA polymerase II promoter involved in cellular response to chemical stimulus	2025-01-11	22/28943	0.00833099	0.0294386	0.00915348	Hif1a	1
GO:0007517	BP	GO:0007517	muscle organ development	2025-02-11	371/28943	0.00834913	0.0294386	0.00915348	Myc/Rb1	2
GO:0048872	BP	GO:0048872	homeostasis of number of cells	2025-02-11	375/28943	0.00852331	0.0299492	0.00931222	Hif1a/Rb1	2
GO:0005980	BP	GO:0005980	glycogen catabolic process	2025-01-11	23/28943	0.00870817	0.0300801	0.00935293	Gabarapl1	1
GO:0010666	BP	GO:0010666	positive regulation of cardiac muscle cell apoptotic process	2025-01-11	23/28943	0.00870817	0.0300801	0.00935293	Capn2	1
GO:0020027	BP	GO:0020027	hemoglobin metabolic process	2025-01-11	23/28943	0.00870817	0.0300801	0.00935293	Hif1a	1
GO:0097284	BP	GO:0097284	hepatocyte apoptotic process	2025-01-11	23/28943	0.00870817	0.0300801	0.00935293	Rb1	1
GO:0098780	BP	GO:0098780	response to mitochondrial depolarisation	2025-01-11	23/28943	0.00870817	0.0300801	0.00935293	Sqstm1	1
GO:0010720	BP	GO:0010720	positive regulation of cell development	2025-02-11	384/28943	0.00892124	0.0302074	0.00939253	Myc/Hif1a	2
GO:0031667	BP	GO:0031667	response to nutrient levels	2025-02-11	387/28943	0.00905573	0.0302074	0.00939253	Zfyve1/Gabarapl1	2
GO:0009251	BP	GO:0009251	glucan catabolic process	2025-01-11	24/28943	0.00908522	0.0302074	0.00939253	Gabarapl1	1
GO:0010663	BP	GO:0010663	positive regulation of striated muscle cell apoptotic process	2025-01-11	24/28943	0.00908522	0.0302074	0.00939253	Capn2	1
GO:0014850	BP	GO:0014850	response to muscle activity	2025-01-11	24/28943	0.00908522	0.0302074	0.00939253	Hif1a	1
GO:0032352	BP	GO:0032352	positive regulation of hormone metabolic process	2025-01-11	24/28943	0.00908522	0.0302074	0.00939253	Hif1a	1
GO:0034643	BP	GO:0034643	establishment of mitochondrion localization, microtubule-mediated	2025-01-11	24/28943	0.00908522	0.0302074	0.00939253	Hif1a	1
GO:0044247	BP	GO:0044247	cellular polysaccharide catabolic process	2025-01-11	24/28943	0.00908522	0.0302074	0.00939253	Gabarapl1	1
GO:0047497	BP	GO:0047497	mitochondrion transport along microtubule	2025-01-11	24/28943	0.00908522	0.0302074	0.00939253	Hif1a	1
GO:1903204	BP	GO:1903204	negative regulation of oxidative stress-induced neuron death	2025-01-11	24/28943	0.00908522	0.0302074	0.00939253	Hif1a	1
GO:1903747	BP	GO:1903747	regulation of establishment of protein localization to mitochondrion	2025-01-11	24/28943	0.00908522	0.0302074	0.00939253	Bag3	1
GO:0019216	BP	GO:0019216	regulation of lipid metabolic process	2025-02-11	388/28943	0.00910076	0.0302074	0.00939253	Sphk1/Capn2	2
GO:0051590	BP	GO:0051590	positive regulation of neurotransmitter transport	2025-01-11	25/28943	0.00946213	0.0309036	0.00960898	Sphk1	1
GO:0070242	BP	GO:0070242	thymocyte apoptotic process	2025-01-11	25/28943	0.00946213	0.0309036	0.00960898	Hif1a	1
GO:1901739	BP	GO:1901739	regulation of myoblast fusion	2025-01-11	25/28943	0.00946213	0.0309036	0.00960898	Capn2	1
GO:2000679	BP	GO:2000679	positive regulation of transcription regulatory region DNA binding	2025-01-11	25/28943	0.00946213	0.0309036	0.00960898	Rb1	1
GO:2001169	BP	GO:2001169	regulation of ATP biosynthetic process	2025-01-11	25/28943	0.00946213	0.0309036	0.00960898	Myc	1
GO:0060562	BP	GO:0060562	epithelial tube morphogenesis	2025-02-11	397/28943	0.00951066	0.0309628	0.0096274	Myc/Hif1a	2
GO:1901214	BP	GO:1901214	regulation of neuron death	2025-02-11	399/28943	0.00960287	0.0309812	0.00963311	Hif1a/Capn2	2
GO:0002070	BP	GO:0002070	epithelial cell maturation	2025-01-11	26/28943	0.00983892	0.0309812	0.00963311	Hif1a	1
GO:0002082	BP	GO:0002082	regulation of oxidative phosphorylation	2025-01-11	26/28943	0.00983892	0.0309812	0.00963311	Myc	1
GO:0007064	BP	GO:0007064	mitotic sister chromatid cohesion	2025-01-11	26/28943	0.00983892	0.0309812	0.00963311	Rb1	1
GO:0010575	BP	GO:0010575	positive regulation of vascular endothelial growth factor production	2025-01-11	26/28943	0.00983892	0.0309812	0.00963311	Hif1a	1
GO:0010829	BP	GO:0010829	negative regulation of glucose transmembrane transport	2025-01-11	26/28943	0.00983892	0.0309812	0.00963311	Myc	1
GO:0042474	BP	GO:0042474	middle ear morphogenesis	2025-01-11	26/28943	0.00983892	0.0309812	0.00963311	Myc	1
GO:0048266	BP	GO:0048266	behavioral response to pain	2025-01-11	26/28943	0.00983892	0.0309812	0.00963311	Capn2	1
GO:0071459	BP	GO:0071459	protein localization to chromosome, centromeric region	2025-01-11	26/28943	0.00983892	0.0309812	0.00963311	Rb1	1
GO:1903146	BP	GO:1903146	regulation of autophagy of mitochondrion	2025-01-11	26/28943	0.00983892	0.0309812	0.00963311	Hif1a	1
GO:0006979	BP	GO:0006979	response to oxidative stress	2025-02-11	407/28943	0.00997574	0.0309812	0.00963311	Sphk1/Hif1a	2
GO:0051098	BP	GO:0051098	regulation of binding	2025-02-11	408/28943	0.0100228	0.0309812	0.00963311	Myc/Rb1	2
GO:0003176	BP	GO:0003176	aortic valve development	2025-01-11	27/28943	0.0102156	0.0309812	0.00963311	Rb1	1
GO:0031338	BP	GO:0031338	regulation of vesicle fusion	2025-01-11	27/28943	0.0102156	0.0309812	0.00963311	Sphk1	1
GO:0036003	BP	GO:0036003	positive regulation of transcription from RNA polymerase II promoter in response to stress	2025-01-11	27/28943	0.0102156	0.0309812	0.00963311	Hif1a	1
GO:0045838	BP	GO:0045838	positive regulation of membrane potential	2025-01-11	27/28943	0.0102156	0.0309812	0.00963311	Myc	1
GO:0051654	BP	GO:0051654	establishment of mitochondrion localization	2025-01-11	27/28943	0.0102156	0.0309812	0.00963311	Hif1a	1
GO:0060143	BP	GO:0060143	positive regulation of syncytium formation by plasma membrane fusion	2025-01-11	27/28943	0.0102156	0.0309812	0.00963311	Capn2	1
GO:0060252	BP	GO:0060252	positive regulation of glial cell proliferation	2025-01-11	27/28943	0.0102156	0.0309812	0.00963311	Myc	1
GO:0060575	BP	GO:0060575	intestinal epithelial cell differentiation	2025-01-11	27/28943	0.0102156	0.0309812	0.00963311	Hif1a	1
GO:0070168	BP	GO:0070168	negative regulation of biomineral tissue development	2025-01-11	27/28943	0.0102156	0.0309812	0.00963311	Hif1a	1
GO:1901857	BP	GO:1901857	positive regulation of cellular respiration	2025-01-11	27/28943	0.0102156	0.0309812	0.00963311	Myc	1
GO:1902175	BP	GO:1902175	regulation of oxidative stress-induced intrinsic apoptotic signaling pathway	2025-01-11	27/28943	0.0102156	0.0309812	0.00963311	Hif1a	1
GO:0000272	BP	GO:0000272	polysaccharide catabolic process	2025-01-11	28/28943	0.0105921	0.0312948	0.00973064	Gabarapl1	1
GO:0032740	BP	GO:0032740	positive regulation of interleukin-17 production	2025-01-11	28/28943	0.0105921	0.0312948	0.00973064	Sphk1	1
GO:0045648	BP	GO:0045648	positive regulation of erythrocyte differentiation	2025-01-11	28/28943	0.0105921	0.0312948	0.00973064	Hif1a	1
GO:0061298	BP	GO:0061298	retina vasculature development in camera-type eye	2025-01-11	28/28943	0.0105921	0.0312948	0.00973064	Hif1a	1
GO:0110150	BP	GO:0110150	negative regulation of biomineralization	2025-01-11	28/28943	0.0105921	0.0312948	0.00973064	Hif1a	1
GO:1900017	BP	GO:1900017	positive regulation of cytokine production involved in inflammatory response	2025-01-11	28/28943	0.0105921	0.0312948	0.00973064	Hif1a	1
GO:1905820	BP	GO:1905820	positive regulation of chromosome separation	2025-01-11	28/28943	0.0105921	0.0312948	0.00973064	Rb1	1
GO:0009991	BP	GO:0009991	response to extracellular stimulus	2025-02-11	420/28943	0.0105954	0.0312948	0.00973064	Zfyve1/Gabarapl1	2
GO:0051047	BP	GO:0051047	positive regulation of secretion	2025-02-11	420/28943	0.0105954	0.0312948	0.00973064	Sphk1/Hif1a	2
GO:0019221	BP	GO:0019221	cytokine-mediated signaling pathway	2025-02-11	421/28943	0.0106438	0.0313468	0.00974681	Sphk1/Hif1a	2
GO:0006875	BP	GO:0006875	cellular metal ion homeostasis	2025-02-11	425/28943	0.0108382	0.0317361	0.00986785	Myc/Hif1a	2
GO:0009150	BP	GO:0009150	purine ribonucleotide metabolic process	2025-02-11	425/28943	0.0108382	0.0317361	0.00986785	Myc/Hif1a	2
GO:0060571	BP	GO:0060571	morphogenesis of an epithelial fold	2025-01-11	29/28943	0.0109685	0.0318007	0.00988795	Hif1a	1
GO:1900745	BP	GO:1900745	positive regulation of p38MAPK cascade	2025-01-11	29/28943	0.0109685	0.0318007	0.00988795	Sphk1	1
GO:1903055	BP	GO:1903055	positive regulation of extracellular matrix organization	2025-01-11	29/28943	0.0109685	0.0318007	0.00988795	Rb1	1
GO:0072594	BP	GO:0072594	establishment of protein localization to organelle	2025-02-11	428/28943	0.0109851	0.0318007	0.00988795	Sqstm1/Bag3	2
GO:0009314	BP	GO:0009314	response to radiation	2025-02-11	432/28943	0.0111824	0.032023	0.00995706	Myc/Hif1a	2
GO:0001516	BP	GO:0001516	prostaglandin biosynthetic process	2025-01-11	30/28943	0.0113448	0.032023	0.00995706	Sphk1	1
GO:0010800	BP	GO:0010800	positive regulation of peptidyl-threonine phosphorylation	2025-01-11	30/28943	0.0113448	0.032023	0.00995706	Sphk1	1
GO:0034311	BP	GO:0034311	diol metabolic process	2025-01-11	30/28943	0.0113448	0.032023	0.00995706	Sphk1	1
GO:0046457	BP	GO:0046457	prostanoid biosynthetic process	2025-01-11	30/28943	0.0113448	0.032023	0.00995706	Sphk1	1
GO:0046885	BP	GO:0046885	regulation of hormone biosynthetic process	2025-01-11	30/28943	0.0113448	0.032023	0.00995706	Hif1a	1
GO:0090200	BP	GO:0090200	positive regulation of release of cytochrome c from mitochondria	2025-01-11	30/28943	0.0113448	0.032023	0.00995706	Tnfsf10	1
GO:0150077	BP	GO:0150077	regulation of neuroinflammatory response	2025-01-11	30/28943	0.0113448	0.032023	0.00995706	Sphk1	1
GO:1900273	BP	GO:1900273	positive regulation of long-term synaptic potentiation	2025-01-11	30/28943	0.0113448	0.032023	0.00995706	Sqstm1	1
GO:0051090	BP	GO:0051090	regulation of DNA-binding transcription factor activity	2025-02-11	436/28943	0.0113812	0.0320373	0.00996148	Sphk1/Rb1	2
GO:0050678	BP	GO:0050678	regulation of epithelial cell proliferation	2025-02-11	442/28943	0.0116825	0.0325439	0.010119	Myc/Rb1	2
GO:0030947	BP	GO:0030947	regulation of vascular endothelial growth factor receptor signaling pathway	2025-01-11	31/28943	0.0117209	0.0325439	0.010119	Hif1a	1
GO:0035455	BP	GO:0035455	response to interferon-alpha	2025-01-11	31/28943	0.0117209	0.0325439	0.010119	Myc	1
GO:0070233	BP	GO:0070233	negative regulation of T cell apoptotic process	2025-01-11	31/28943	0.0117209	0.0325439	0.010119	Hif1a	1
GO:1901798	BP	GO:1901798	positive regulation of signal transduction by p53 class mediator	2025-01-11	31/28943	0.0117209	0.0325439	0.010119	Myc	1
GO:0009259	BP	GO:0009259	ribonucleotide metabolic process	2025-02-11	445/28943	0.0118344	0.0326809	0.0101616	Myc/Hif1a	2
GO:0052547	BP	GO:0052547	regulation of peptidase activity	2025-02-11	445/28943	0.0118344	0.0326809	0.0101616	Tnfsf10/Myc	2
GO:0006163	BP	GO:0006163	purine nucleotide metabolic process	2025-02-11	449/28943	0.0120384	0.0328713	0.0102208	Myc/Hif1a	2
GO:0010574	BP	GO:0010574	regulation of vascular endothelial growth factor production	2025-01-11	32/28943	0.0120969	0.0328713	0.0102208	Hif1a	1
GO:0030224	BP	GO:0030224	monocyte differentiation	2025-01-11	32/28943	0.0120969	0.0328713	0.0102208	Myc	1
GO:0034389	BP	GO:0034389	lipid droplet organization	2025-01-11	32/28943	0.0120969	0.0328713	0.0102208	Zfyve1	1
GO:0035162	BP	GO:0035162	embryonic hemopoiesis	2025-01-11	32/28943	0.0120969	0.0328713	0.0102208	Hif1a	1
GO:0044030	BP	GO:0044030	regulation of DNA methylation	2025-01-11	32/28943	0.0120969	0.0328713	0.0102208	Myc	1
GO:0044772	BP	GO:0044772	mitotic cell cycle phase transition	2025-02-11	451/28943	0.012141	0.0329033	0.0102308	Myc/Rb1	2
GO:0019693	BP	GO:0019693	ribose phosphate metabolic process	2025-02-11	456/28943	0.0123991	0.0335137	0.0104206	Myc/Hif1a	2
GO:1902253	BP	GO:1902253	regulation of intrinsic apoptotic signaling pathway by p53 class mediator	2025-01-11	33/28943	0.0124728	0.033535	0.0104272	Myc	1
GO:1905314	BP	GO:1905314	semi-lunar valve development	2025-01-11	33/28943	0.0124728	0.033535	0.0104272	Rb1	1
GO:0001558	BP	GO:0001558	regulation of cell growth	2025-02-11	459/28943	0.0125551	0.0336676	0.0104684	Sphk1/Rb1	2
GO:0002052	BP	GO:0002052	positive regulation of neuroblast proliferation	2025-01-11	34/28943	0.0128485	0.0340069	0.0105739	Hif1a	1
GO:0002053	BP	GO:0002053	positive regulation of mesenchymal cell proliferation	2025-01-11	34/28943	0.0128485	0.0340069	0.0105739	Myc	1
GO:0007007	BP	GO:0007007	inner mitochondrial membrane organization	2025-01-11	34/28943	0.0128485	0.0340069	0.0105739	Myc	1
GO:0051973	BP	GO:0051973	positive regulation of telomerase activity	2025-01-11	34/28943	0.0128485	0.0340069	0.0105739	Myc	1
GO:2000108	BP	GO:2000108	positive regulation of leukocyte apoptotic process	2025-01-11	34/28943	0.0128485	0.0340069	0.0105739	Myc	1
GO:0045987	BP	GO:0045987	positive regulation of smooth muscle contraction	2025-01-11	35/28943	0.0132241	0.0347304	0.0107989	Sphk1	1
GO:0060142	BP	GO:0060142	regulation of syncytium formation by plasma membrane fusion	2025-01-11	35/28943	0.0132241	0.0347304	0.0107989	Capn2	1
GO:1903203	BP	GO:1903203	regulation of oxidative stress-induced neuron death	2025-01-11	35/28943	0.0132241	0.0347304	0.0107989	Hif1a	1
GO:0000280	BP	GO:0000280	nuclear division	2025-02-11	478/28943	0.0135637	0.0353521	0.0109922	Sphk1/Rb1	2
GO:0002902	BP	GO:0002902	regulation of B cell apoptotic process	2025-01-11	36/28943	0.0135996	0.0353521	0.0109922	Myc	1
GO:0010573	BP	GO:0010573	vascular endothelial growth factor production	2025-01-11	36/28943	0.0135996	0.0353521	0.0109922	Hif1a	1
GO:0090183	BP	GO:0090183	regulation of kidney development	2025-01-11	36/28943	0.0135996	0.0353521	0.0109922	Myc	1
GO:0072521	BP	GO:0072521	purine-containing compound metabolic process	2025-02-11	483/28943	0.0138349	0.0358703	0.0111533	Myc/Hif1a	2
GO:0016540	BP	GO:0016540	protein autoprocessing	2025-01-11	37/28943	0.013975	0.0358703	0.0111533	Capn2	1
GO:0036475	BP	GO:0036475	neuron death in response to oxidative stress	2025-01-11	37/28943	0.013975	0.0358703	0.0111533	Hif1a	1
GO:0046677	BP	GO:0046677	response to antibiotic	2025-01-11	37/28943	0.013975	0.0358703	0.0111533	Hif1a	1
GO:0046825	BP	GO:0046825	regulation of protein export from nucleus	2025-01-11	37/28943	0.013975	0.0358703	0.0111533	Bag3	1
GO:0000423	BP	GO:0000423	mitophagy	2025-01-11	38/28943	0.0143502	0.0363753	0.0113103	Sqstm1	1
GO:0030808	BP	GO:0030808	regulation of nucleotide biosynthetic process	2025-01-11	38/28943	0.0143502	0.0363753	0.0113103	Myc	1
GO:0071634	BP	GO:0071634	regulation of transforming growth factor beta production	2025-01-11	38/28943	0.0143502	0.0363753	0.0113103	Hif1a	1
GO:1900371	BP	GO:1900371	regulation of purine nucleotide biosynthetic process	2025-01-11	38/28943	0.0143502	0.0363753	0.0113103	Myc	1
GO:1903580	BP	GO:1903580	positive regulation of ATP metabolic process	2025-01-11	38/28943	0.0143502	0.0363753	0.0113103	Myc	1
GO:0060537	BP	GO:0060537	muscle tissue development	2025-02-11	494/28943	0.01444	0.036512	0.0113528	Myc/Rb1	2
GO:0030003	BP	GO:0030003	cellular cation homeostasis	2025-02-11	498/28943	0.0146629	0.0366872	0.0114073	Myc/Hif1a	2
GO:0002068	BP	GO:0002068	glandular epithelial cell development	2025-01-11	39/28943	0.0147253	0.0366872	0.0114073	Hif1a	1
GO:0010661	BP	GO:0010661	positive regulation of muscle cell apoptotic process	2025-01-11	39/28943	0.0147253	0.0366872	0.0114073	Capn2	1
GO:0014823	BP	GO:0014823	response to activity	2025-01-11	39/28943	0.0147253	0.0366872	0.0114073	Hif1a	1
GO:0045879	BP	GO:0045879	negative regulation of smoothened signaling pathway	2025-01-11	39/28943	0.0147253	0.0366872	0.0114073	Rb1	1
GO:0048265	BP	GO:0048265	response to pain	2025-01-11	39/28943	0.0147253	0.0366872	0.0114073	Capn2	1
GO:0010664	BP	GO:0010664	negative regulation of striated muscle cell apoptotic process	2025-01-11	40/28943	0.0151003	0.0373475	0.0116126	Bag3	1
GO:0010803	BP	GO:0010803	regulation of tumor necrosis factor-mediated signaling pathway	2025-01-11	40/28943	0.0151003	0.0373475	0.0116126	Sphk1	1
GO:0071604	BP	GO:0071604	transforming growth factor beta production	2025-01-11	40/28943	0.0151003	0.0373475	0.0116126	Hif1a	1
GO:0006636	BP	GO:0006636	unsaturated fatty acid biosynthetic process	2025-01-11	41/28943	0.0154751	0.0380897	0.0118434	Sphk1	1
GO:0008608	BP	GO:0008608	attachment of spindle microtubules to kinetochore	2025-01-11	41/28943	0.0154751	0.0380897	0.0118434	Rb1	1
GO:0001774	BP	GO:0001774	microglial cell activation	2025-01-11	42/28943	0.0158498	0.0386387	0.0120141	Sphk1	1
GO:0010464	BP	GO:0010464	regulation of mesenchymal cell proliferation	2025-01-11	42/28943	0.0158498	0.0386387	0.0120141	Myc	1
GO:1900744	BP	GO:1900744	regulation of p38MAPK cascade	2025-01-11	42/28943	0.0158498	0.0386387	0.0120141	Sphk1	1
GO:1903725	BP	GO:1903725	regulation of phospholipid metabolic process	2025-01-11	42/28943	0.0158498	0.0386387	0.0120141	Capn2	1
GO:0045981	BP	GO:0045981	positive regulation of nucleotide metabolic process	2025-01-11	43/28943	0.0162244	0.0393635	0.0122395	Myc	1
GO:1900544	BP	GO:1900544	positive regulation of purine nucleotide metabolic process	2025-01-11	43/28943	0.0162244	0.0393635	0.0122395	Myc	1
GO:0001782	BP	GO:0001782	B cell homeostasis	2025-01-11	44/28943	0.0165988	0.039892	0.0124038	Hif1a	1
GO:0044275	BP	GO:0044275	cellular carbohydrate catabolic process	2025-01-11	44/28943	0.0165988	0.039892	0.0124038	Gabarapl1	1
GO:0048147	BP	GO:0048147	negative regulation of fibroblast proliferation	2025-01-11	44/28943	0.0165988	0.039892	0.0124038	Myc	1
GO:0071168	BP	GO:0071168	protein localization to chromatin	2025-01-11	44/28943	0.0165988	0.039892	0.0124038	Rb1	1
GO:0008631	BP	GO:0008631	intrinsic apoptotic signaling pathway in response to oxidative stress	2025-01-11	45/28943	0.0169732	0.040505	0.0125944	Hif1a	1
GO:0032007	BP	GO:0032007	negative regulation of TOR signaling	2025-01-11	45/28943	0.0169732	0.040505	0.0125944	Hif1a	1
GO:0032660	BP	GO:0032660	regulation of interleukin-17 production	2025-01-11	45/28943	0.0169732	0.040505	0.0125944	Sphk1	1
GO:0001783	BP	GO:0001783	B cell apoptotic process	2025-01-11	46/28943	0.0173473	0.0408243	0.0126937	Myc	1
GO:0002269	BP	GO:0002269	leukocyte activation involved in inflammatory response	2025-01-11	46/28943	0.0173473	0.0408243	0.0126937	Sphk1	1
GO:0030225	BP	GO:0030225	macrophage differentiation	2025-01-11	46/28943	0.0173473	0.0408243	0.0126937	Rb1	1
GO:0030279	BP	GO:0030279	negative regulation of ossification	2025-01-11	46/28943	0.0173473	0.0408243	0.0126937	Hif1a	1
GO:0071542	BP	GO:0071542	dopaminergic neuron differentiation	2025-01-11	46/28943	0.0173473	0.0408243	0.0126937	Hif1a	1
GO:2000273	BP	GO:2000273	positive regulation of signaling receptor activity	2025-01-11	46/28943	0.0173473	0.0408243	0.0126937	Hif1a	1
GO:0003179	BP	GO:0003179	heart valve morphogenesis	2025-01-11	47/28943	0.0177214	0.0412286	0.0128194	Rb1	1
GO:0010907	BP	GO:0010907	positive regulation of glucose metabolic process	2025-01-11	47/28943	0.0177214	0.0412286	0.0128194	Hif1a	1
GO:0035774	BP	GO:0035774	positive regulation of insulin secretion involved in cellular response to glucose stimulus	2025-01-11	47/28943	0.0177214	0.0412286	0.0128194	Hif1a	1
GO:0050974	BP	GO:0050974	detection of mechanical stimulus involved in sensory perception	2025-01-11	47/28943	0.0177214	0.0412286	0.0128194	Myc	1
GO:0120163	BP	GO:0120163	negative regulation of cold-induced thermogenesis	2025-01-11	47/28943	0.0177214	0.0412286	0.0128194	Rb1	1
GO:0032620	BP	GO:0032620	interleukin-17 production	2025-01-11	48/28943	0.0180953	0.0417175	0.0129714	Sphk1	1
GO:0048010	BP	GO:0048010	vascular endothelial growth factor receptor signaling pathway	2025-01-11	48/28943	0.0180953	0.0417175	0.0129714	Hif1a	1
GO:0051972	BP	GO:0051972	regulation of telomerase activity	2025-01-11	48/28943	0.0180953	0.0417175	0.0129714	Myc	1
GO:0090317	BP	GO:0090317	negative regulation of intracellular protein transport	2025-01-11	48/28943	0.0180953	0.0417175	0.0129714	Bag3	1
GO:0010332	BP	GO:0010332	response to gamma radiation	2025-01-11	49/28943	0.0184691	0.0421974	0.0131206	Myc	1
GO:0010799	BP	GO:0010799	regulation of peptidyl-threonine phosphorylation	2025-01-11	49/28943	0.0184691	0.0421974	0.0131206	Sphk1	1
GO:0061900	BP	GO:0061900	glial cell activation	2025-01-11	49/28943	0.0184691	0.0421974	0.0131206	Sphk1	1
GO:0070232	BP	GO:0070232	regulation of T cell apoptotic process	2025-01-11	49/28943	0.0184691	0.0421974	0.0131206	Hif1a	1
GO:0032350	BP	GO:0032350	regulation of hormone metabolic process	2025-01-11	51/28943	0.0192163	0.0434179	0.0135001	Hif1a	1
GO:0045646	BP	GO:0045646	regulation of erythrocyte differentiation	2025-01-11	51/28943	0.0192163	0.0434179	0.0135001	Hif1a	1
GO:0046456	BP	GO:0046456	icosanoid biosynthetic process	2025-01-11	51/28943	0.0192163	0.0434179	0.0135001	Sphk1	1
GO:0051646	BP	GO:0051646	mitochondrion localization	2025-01-11	51/28943	0.0192163	0.0434179	0.0135001	Hif1a	1
GO:1902692	BP	GO:1902692	regulation of neuroblast proliferation	2025-01-11	51/28943	0.0192163	0.0434179	0.0135001	Hif1a	1
GO:0042307	BP	GO:0042307	positive regulation of protein import into nucleus	2025-01-11	52/28943	0.0195898	0.0441636	0.013732	Bag3	1
GO:0007520	BP	GO:0007520	myoblast fusion	2025-01-11	53/28943	0.019963	0.0444156	0.0138103	Capn2	1
GO:0034605	BP	GO:0034605	cellular response to heat	2025-01-11	53/28943	0.019963	0.0444156	0.0138103	Bag3	1
GO:0043550	BP	GO:0043550	regulation of lipid kinase activity	2025-01-11	53/28943	0.019963	0.0444156	0.0138103	Rb1	1
GO:0090199	BP	GO:0090199	regulation of release of cytochrome c from mitochondria	2025-01-11	53/28943	0.019963	0.0444156	0.0138103	Tnfsf10	1
GO:1903202	BP	GO:1903202	negative regulation of oxidative stress-induced cell death	2025-01-11	53/28943	0.019963	0.0444156	0.0138103	Hif1a	1
GO:2000677	BP	GO:2000677	regulation of transcription regulatory region DNA binding	2025-01-11	53/28943	0.019963	0.0444156	0.0138103	Rb1	1
GO:0006692	BP	GO:0006692	prostanoid metabolic process	2025-01-11	54/28943	0.0203362	0.0449514	0.0139769	Sphk1	1
GO:0006693	BP	GO:0006693	prostaglandin metabolic process	2025-01-11	54/28943	0.0203362	0.0449514	0.0139769	Sphk1	1
GO:0038066	BP	GO:0038066	p38MAPK cascade	2025-01-11	54/28943	0.0203362	0.0449514	0.0139769	Sphk1	1
GO:0001961	BP	GO:0001961	positive regulation of cytokine-mediated signaling pathway	2025-01-11	55/28943	0.0207092	0.0450912	0.0140204	Hif1a	1
GO:0006111	BP	GO:0006111	regulation of gluconeogenesis	2025-01-11	55/28943	0.0207092	0.0450912	0.0140204	Hif1a	1
GO:0007062	BP	GO:0007062	sister chromatid cohesion	2025-01-11	55/28943	0.0207092	0.0450912	0.0140204	Rb1	1
GO:0045933	BP	GO:0045933	positive regulation of muscle contraction	2025-01-11	55/28943	0.0207092	0.0450912	0.0140204	Sphk1	1
GO:0048546	BP	GO:0048546	digestive tract morphogenesis	2025-01-11	55/28943	0.0207092	0.0450912	0.0140204	Hif1a	1
GO:0072132	BP	GO:0072132	mesenchyme morphogenesis	2025-01-11	55/28943	0.0207092	0.0450912	0.0140204	Myc	1
GO:2000378	BP	GO:2000378	negative regulation of reactive oxygen species metabolic process	2025-01-11	55/28943	0.0207092	0.0450912	0.0140204	Hif1a	1
GO:0010463	BP	GO:0010463	mesenchymal cell proliferation	2025-01-11	56/28943	0.0210821	0.0456108	0.014182	Myc	1
GO:0046633	BP	GO:0046633	alpha-beta T cell proliferation	2025-01-11	56/28943	0.0210821	0.0456108	0.014182	Myc	1
GO:1900271	BP	GO:1900271	regulation of long-term synaptic potentiation	2025-01-11	56/28943	0.0210821	0.0456108	0.014182	Sqstm1	1
GO:0002762	BP	GO:0002762	negative regulation of myeloid leukocyte differentiation	2025-01-11	57/28943	0.0214549	0.0459297	0.0142811	Myc	1
GO:0043536	BP	GO:0043536	positive regulation of blood vessel endothelial cell migration	2025-01-11	57/28943	0.0214549	0.0459297	0.0142811	Hif1a	1
GO:0051055	BP	GO:0051055	negative regulation of lipid biosynthetic process	2025-01-11	57/28943	0.0214549	0.0459297	0.0142811	Sphk1	1
GO:1903053	BP	GO:1903053	regulation of extracellular matrix organization	2025-01-11	57/28943	0.0214549	0.0459297	0.0142811	Rb1	1
GO:1903533	BP	GO:1903533	regulation of protein targeting	2025-01-11	57/28943	0.0214549	0.0459297	0.0142811	Bag3	1
GO:0003170	BP	GO:0003170	heart valve development	2025-01-11	58/28943	0.0218275	0.046338	0.0144081	Rb1	1
GO:0014014	BP	GO:0014014	negative regulation of gliogenesis	2025-01-11	58/28943	0.0218275	0.046338	0.0144081	Rb1	1
GO:0043030	BP	GO:0043030	regulation of macrophage activation	2025-01-11	58/28943	0.0218275	0.046338	0.0144081	Sphk1	1
GO:0070229	BP	GO:0070229	negative regulation of lymphocyte apoptotic process	2025-01-11	58/28943	0.0218275	0.046338	0.0144081	Hif1a	1
GO:2001238	BP	GO:2001238	positive regulation of extrinsic apoptotic signaling pathway	2025-01-11	59/28943	0.0222	0.0470308	0.0146235	Tnfsf10	1
GO:0002066	BP	GO:0002066	columnar/cuboidal epithelial cell development	2025-01-11	60/28943	0.0225724	0.0471338	0.0146555	Hif1a	1
GO:0007595	BP	GO:0007595	lactation	2025-01-11	60/28943	0.0225724	0.0471338	0.0146555	Hif1a	1
GO:0010665	BP	GO:0010665	regulation of cardiac muscle cell apoptotic process	2025-01-11	60/28943	0.0225724	0.0471338	0.0146555	Capn2	1
GO:0030199	BP	GO:0030199	collagen fibril organization	2025-01-11	60/28943	0.0225724	0.0471338	0.0146555	Rb1	1
GO:0035924	BP	GO:0035924	cellular response to vascular endothelial growth factor stimulus	2025-01-11	60/28943	0.0225724	0.0471338	0.0146555	Sphk1	1
GO:0046717	BP	GO:0046717	acid secretion	2025-01-11	60/28943	0.0225724	0.0471338	0.0146555	Myc	1
GO:1900015	BP	GO:1900015	regulation of cytokine production involved in inflammatory response	2025-01-11	60/28943	0.0225724	0.0471338	0.0146555	Hif1a	1
GO:0046470	BP	GO:0046470	phosphatidylcholine metabolic process	2025-01-11	61/28943	0.0229447	0.0477155	0.0148364	Capn2	1
GO:0060760	BP	GO:0060760	positive regulation of response to cytokine stimulus	2025-01-11	61/28943	0.0229447	0.0477155	0.0148364	Hif1a	1
GO:0001947	BP	GO:0001947	heart looping	2025-01-11	62/28943	0.0233168	0.0480967	0.0149549	Hif1a	1
GO:0010676	BP	GO:0010676	positive regulation of cellular carbohydrate metabolic process	2025-01-11	62/28943	0.0233168	0.0480967	0.0149549	Hif1a	1
GO:0050982	BP	GO:0050982	detection of mechanical stimulus	2025-01-11	62/28943	0.0233168	0.0480967	0.0149549	Myc	1
GO:1903078	BP	GO:1903078	positive regulation of protein localization to plasma membrane	2025-01-11	62/28943	0.0233168	0.0480967	0.0149549	Sqstm1	1
GO:0001755	BP	GO:0001755	neural crest cell migration	2025-01-11	63/28943	0.0236888	0.0483745	0.0150413	Hif1a	1
GO:0042446	BP	GO:0042446	hormone biosynthetic process	2025-01-11	63/28943	0.0236888	0.0483745	0.0150413	Hif1a	1
GO:0042551	BP	GO:0042551	neuron maturation	2025-01-11	63/28943	0.0236888	0.0483745	0.0150413	Rb1	1
GO:0046173	BP	GO:0046173	polyol biosynthetic process	2025-01-11	63/28943	0.0236888	0.0483745	0.0150413	Sphk1	1
GO:0070098	BP	GO:0070098	chemokine-mediated signaling pathway	2025-01-11	63/28943	0.0236888	0.0483745	0.0150413	Hif1a	1
GO:0010659	BP	GO:0010659	cardiac muscle cell apoptotic process	2025-01-11	64/28943	0.0240606	0.0487431	0.0151559	Capn2	1
GO:0014911	BP	GO:0014911	positive regulation of smooth muscle cell migration	2025-01-11	64/28943	0.0240606	0.0487431	0.0151559	Myc	1
GO:0060261	BP	GO:0060261	positive regulation of transcription initiation by RNA polymerase II	2025-01-11	64/28943	0.0240606	0.0487431	0.0151559	Myc	1
GO:0071260	BP	GO:0071260	cellular response to mechanical stimulus	2025-01-11	64/28943	0.0240606	0.0487431	0.0151559	Bag3	1
GO:0001836	BP	GO:0001836	release of cytochrome c from mitochondria	2025-01-11	65/28943	0.0244324	0.0491057	0.0152686	Tnfsf10	1
GO:0010656	BP	GO:0010656	negative regulation of muscle cell apoptotic process	2025-01-11	65/28943	0.0244324	0.0491057	0.0152686	Bag3	1
GO:0090497	BP	GO:0090497	mesenchymal cell migration	2025-01-11	65/28943	0.0244324	0.0491057	0.0152686	Hif1a	1
GO:0098930	BP	GO:0098930	axonal transport	2025-01-11	65/28943	0.0244324	0.0491057	0.0152686	Hif1a	1
GO:0002534	BP	GO:0002534	cytokine production involved in inflammatory response	2025-01-11	66/28943	0.024804	0.0496567	0.01544	Hif1a	1
GO:0070231	BP	GO:0070231	T cell apoptotic process	2025-01-11	66/28943	0.024804	0.0496567	0.01544	Hif1a	1
GO:0001658	BP	GO:0001658	branching involved in ureteric bud morphogenesis	2025-01-11	67/28943	0.0251754	0.0500074	0.015549	Myc	1
GO:0006611	BP	GO:0006611	protein export from nucleus	2025-01-11	67/28943	0.0251754	0.0500074	0.015549	Bag3	1
GO:0007032	BP	GO:0007032	endosome organization	2025-01-11	67/28943	0.0251754	0.0500074	0.015549	Sqstm1	1
GO:0032387	BP	GO:0032387	negative regulation of intracellular transport	2025-01-11	67/28943	0.0251754	0.0500074	0.015549	Bag3	1
GO:0061371	BP	GO:0061371	determination of heart left/right asymmetry	2025-01-11	68/28943	0.0255468	0.0506463	0.0157477	Hif1a	1
GO:0003143	BP	GO:0003143	embryonic heart tube morphogenesis	2025-01-11	69/28943	0.025918	0.0508872	0.0158226	Hif1a	1
GO:0006940	BP	GO:0006940	regulation of smooth muscle contraction	2025-01-11	69/28943	0.025918	0.0508872	0.0158226	Sphk1	1
GO:0046324	BP	GO:0046324	regulation of glucose import	2025-01-11	69/28943	0.025918	0.0508872	0.0158226	Myc	1
GO:1901224	BP	GO:1901224	positive regulation of NIK/NF-kappaB signaling	2025-01-11	69/28943	0.025918	0.0508872	0.0158226	Sphk1	1
GO:1904377	BP	GO:1904377	positive regulation of protein localization to cell periphery	2025-01-11	69/28943	0.025918	0.0508872	0.0158226	Sqstm1	1
GO:0000768	BP	GO:0000768	syncytium formation by plasma membrane fusion	2025-01-11	70/28943	0.0262891	0.0510259	0.0158657	Capn2	1
GO:0046513	BP	GO:0046513	ceramide biosynthetic process	2025-01-11	70/28943	0.0262891	0.0510259	0.0158657	Sphk1	1
GO:0060260	BP	GO:0060260	regulation of transcription initiation by RNA polymerase II	2025-01-11	70/28943	0.0262891	0.0510259	0.0158657	Myc	1
GO:0140253	BP	GO:0140253	cell-cell fusion	2025-01-11	70/28943	0.0262891	0.0510259	0.0158657	Capn2	1
GO:0150076	BP	GO:0150076	neuroinflammatory response	2025-01-11	70/28943	0.0262891	0.0510259	0.0158657	Sphk1	1
GO:1904036	BP	GO:1904036	negative regulation of epithelial cell apoptotic process	2025-01-11	70/28943	0.0262891	0.0510259	0.0158657	Rb1	1
GO:2000144	BP	GO:2000144	positive regulation of DNA-templated transcription initiation	2025-01-11	71/28943	0.0266601	0.0515496	0.0160285	Myc	1
GO:2001244	BP	GO:2001244	positive regulation of intrinsic apoptotic signaling pathway	2025-01-11	71/28943	0.0266601	0.0515496	0.0160285	Myc	1
GO:0006949	BP	GO:0006949	syncytium formation	2025-01-11	72/28943	0.0270309	0.052069	0.01619	Capn2	1
GO:2000134	BP	GO:2000134	negative regulation of G1/S transition of mitotic cell cycle	2025-01-11	72/28943	0.0270309	0.052069	0.01619	Rb1	1
GO:0002763	BP	GO:0002763	positive regulation of myeloid leukocyte differentiation	2025-01-11	73/28943	0.0274016	0.0523869	0.0162889	Rb1	1
GO:0008542	BP	GO:0008542	visual learning	2025-01-11	73/28943	0.0274016	0.0523869	0.0162889	Hif1a	1
GO:1990868	BP	GO:1990868	response to chemokine	2025-01-11	73/28943	0.0274016	0.0523869	0.0162889	Hif1a	1
GO:1990869	BP	GO:1990869	cellular response to chemokine	2025-01-11	73/28943	0.0274016	0.0523869	0.0162889	Hif1a	1
GO:0046824	BP	GO:0046824	positive regulation of nucleocytoplasmic transport	2025-01-11	74/28943	0.0277722	0.0527983	0.0164168	Bag3	1
GO:0060675	BP	GO:0060675	ureteric bud morphogenesis	2025-01-11	74/28943	0.0277722	0.0527983	0.0164168	Myc	1
GO:0098586	BP	GO:0098586	cellular response to virus	2025-01-11	74/28943	0.0277722	0.0527983	0.0164168	Hif1a	1
GO:2000036	BP	GO:2000036	regulation of stem cell population maintenance	2025-01-11	75/28943	0.0281426	0.0533036	0.0165739	Myc	1
GO:2000179	BP	GO:2000179	positive regulation of neural precursor cell proliferation	2025-01-11	75/28943	0.0281426	0.0533036	0.0165739	Hif1a	1
GO:0006305	BP	GO:0006305	DNA alkylation	2025-01-11	76/28943	0.028513	0.0537056	0.0166989	Myc	1
GO:0006306	BP	GO:0006306	DNA methylation	2025-01-11	76/28943	0.028513	0.0537056	0.0166989	Myc	1
GO:0006626	BP	GO:0006626	protein targeting to mitochondrion	2025-01-11	76/28943	0.028513	0.0537056	0.0166989	Bag3	1
GO:0007632	BP	GO:0007632	visual behavior	2025-01-11	77/28943	0.0288832	0.0543025	0.0168845	Hif1a	1
GO:0006919	BP	GO:0006919	activation of cysteine-type endopeptidase activity involved in apoptotic process	2025-01-11	78/28943	0.0292532	0.054396	0.0169136	Myc	1
GO:0019369	BP	GO:0019369	arachidonic acid metabolic process	2025-01-11	78/28943	0.0292532	0.054396	0.0169136	Sphk1	1
GO:0038034	BP	GO:0038034	signal transduction in absence of ligand	2025-01-11	78/28943	0.0292532	0.054396	0.0169136	Bag3	1
GO:0042306	BP	GO:0042306	regulation of protein import into nucleus	2025-01-11	78/28943	0.0292532	0.054396	0.0169136	Bag3	1
GO:0072171	BP	GO:0072171	mesonephric tubule morphogenesis	2025-01-11	78/28943	0.0292532	0.054396	0.0169136	Myc	1
GO:0097192	BP	GO:0097192	extrinsic apoptotic signaling pathway in absence of ligand	2025-01-11	78/28943	0.0292532	0.054396	0.0169136	Bag3	1
GO:0061180	BP	GO:0061180	mammary gland epithelium development	2025-01-11	79/28943	0.0296232	0.0548836	0.0170652	Hif1a	1
GO:1903201	BP	GO:1903201	regulation of oxidative stress-induced cell death	2025-01-11	79/28943	0.0296232	0.0548836	0.0170652	Hif1a	1
GO:0005977	BP	GO:0005977	glycogen metabolic process	2025-01-11	80/28943	0.029993	0.0550682	0.0171226	Gabarapl1	1
GO:0006073	BP	GO:0006073	cellular glucan metabolic process	2025-01-11	80/28943	0.029993	0.0550682	0.0171226	Gabarapl1	1
GO:2000107	BP	GO:2000107	negative regulation of leukocyte apoptotic process	2025-01-11	80/28943	0.029993	0.0550682	0.0171226	Hif1a	1
GO:2000142	BP	GO:2000142	regulation of DNA-templated transcription initiation	2025-01-11	80/28943	0.029993	0.0550682	0.0171226	Myc	1
GO:2000573	BP	GO:2000573	positive regulation of DNA biosynthetic process	2025-01-11	80/28943	0.029993	0.0550682	0.0171226	Myc	1
GO:0007405	BP	GO:0007405	neuroblast proliferation	2025-01-11	81/28943	0.0303626	0.055348	0.0172096	Hif1a	1
GO:0033209	BP	GO:0033209	tumor necrosis factor-mediated signaling pathway	2025-01-11	81/28943	0.0303626	0.055348	0.0172096	Sphk1	1
GO:0044042	BP	GO:0044042	glucan metabolic process	2025-01-11	81/28943	0.0303626	0.055348	0.0172096	Gabarapl1	1
GO:1901796	BP	GO:1901796	regulation of signal transduction by p53 class mediator	2025-01-11	81/28943	0.0303626	0.055348	0.0172096	Myc	1
GO:0003208	BP	GO:0003208	cardiac ventricle morphogenesis	2025-01-11	82/28943	0.0307322	0.0557226	0.0173261	Hif1a	1
GO:0043279	BP	GO:0043279	response to alkaloid	2025-01-11	82/28943	0.0307322	0.0557226	0.0173261	Myc	1
GO:1902807	BP	GO:1902807	negative regulation of cell cycle G1/S phase transition	2025-01-11	82/28943	0.0307322	0.0557226	0.0173261	Rb1	1
GO:0008625	BP	GO:0008625	extrinsic apoptotic signaling pathway via death domain receptors	2025-01-11	83/28943	0.0311016	0.0562923	0.0175032	Bag3	1
GO:0008088	BP	GO:0008088	axo-dendritic transport	2025-01-11	84/28943	0.0314709	0.0567591	0.0176483	Hif1a	1
GO:0072332	BP	GO:0072332	intrinsic apoptotic signaling pathway by p53 class mediator	2025-01-11	84/28943	0.0314709	0.0567591	0.0176483	Myc	1
GO:0046323	BP	GO:0046323	glucose import	2025-01-11	85/28943	0.0318401	0.0572794	0.0178101	Myc	1
GO:0002067	BP	GO:0002067	glandular epithelial cell differentiation	2025-01-11	86/28943	0.0322091	0.0572794	0.0178101	Hif1a	1
GO:0003151	BP	GO:0003151	outflow tract morphogenesis	2025-01-11	86/28943	0.0322091	0.0572794	0.0178101	Hif1a	1
GO:0006094	BP	GO:0006094	gluconeogenesis	2025-01-11	86/28943	0.0322091	0.0572794	0.0178101	Hif1a	1
GO:0014015	BP	GO:0014015	positive regulation of gliogenesis	2025-01-11	86/28943	0.0322091	0.0572794	0.0178101	Myc	1
GO:0019229	BP	GO:0019229	regulation of vasoconstriction	2025-01-11	86/28943	0.0322091	0.0572794	0.0178101	Hif1a	1
GO:0072078	BP	GO:0072078	nephron tubule morphogenesis	2025-01-11	86/28943	0.0322091	0.0572794	0.0178101	Myc	1
GO:0097009	BP	GO:0097009	energy homeostasis	2025-01-11	86/28943	0.0322091	0.0572794	0.0178101	Sqstm1	1
GO:0031397	BP	GO:0031397	negative regulation of protein ubiquitination	2025-01-11	87/28943	0.032578	0.0577339	0.0179515	Sqstm1	1
GO:0061178	BP	GO:0061178	regulation of insulin secretion involved in cellular response to glucose stimulus	2025-01-11	87/28943	0.032578	0.0577339	0.0179515	Hif1a	1
GO:0030071	BP	GO:0030071	regulation of mitotic metaphase/anaphase transition	2025-01-11	88/28943	0.0329468	0.0577845	0.0179672	Rb1	1
GO:0030500	BP	GO:0030500	regulation of bone mineralization	2025-01-11	88/28943	0.0329468	0.0577845	0.0179672	Hif1a	1
GO:0035019	BP	GO:0035019	somatic stem cell population maintenance	2025-01-11	88/28943	0.0329468	0.0577845	0.0179672	Myc	1
GO:0051881	BP	GO:0051881	regulation of mitochondrial membrane potential	2025-01-11	88/28943	0.0329468	0.0577845	0.0179672	Myc	1
GO:0072088	BP	GO:0072088	nephron epithelium morphogenesis	2025-01-11	88/28943	0.0329468	0.0577845	0.0179672	Myc	1
GO:0072384	BP	GO:0072384	organelle transport along microtubule	2025-01-11	88/28943	0.0329468	0.0577845	0.0179672	Hif1a	1
GO:0002260	BP	GO:0002260	lymphocyte homeostasis	2025-01-11	89/28943	0.0333155	0.0580316	0.018044	Hif1a	1
GO:0010827	BP	GO:0010827	regulation of glucose transmembrane transport	2025-01-11	89/28943	0.0333155	0.0580316	0.018044	Myc	1
GO:0014032	BP	GO:0014032	neural crest cell development	2025-01-11	89/28943	0.0333155	0.0580316	0.018044	Hif1a	1
GO:0031507	BP	GO:0031507	heterochromatin formation	2025-01-11	89/28943	0.0333155	0.0580316	0.018044	Rb1	1
GO:0006112	BP	GO:0006112	energy reserve metabolic process	2025-01-11	90/28943	0.033684	0.0580778	0.0180584	Gabarapl1	1
GO:0006367	BP	GO:0006367	transcription initiation at RNA polymerase II promoter	2025-01-11	90/28943	0.033684	0.0580778	0.0180584	Myc	1
GO:0019319	BP	GO:0019319	hexose biosynthetic process	2025-01-11	90/28943	0.033684	0.0580778	0.0180584	Hif1a	1
GO:0019915	BP	GO:0019915	lipid storage	2025-01-11	90/28943	0.033684	0.0580778	0.0180584	Zfyve1	1
GO:0072028	BP	GO:0072028	nephron morphogenesis	2025-01-11	90/28943	0.033684	0.0580778	0.0180584	Myc	1
GO:1900407	BP	GO:1900407	regulation of cellular response to oxidative stress	2025-01-11	90/28943	0.033684	0.0580778	0.0180584	Hif1a	1
GO:0001656	BP	GO:0001656	metanephros development	2025-01-11	91/28943	0.0340524	0.058515	0.0181943	Myc	1
GO:1902099	BP	GO:1902099	regulation of metaphase/anaphase transition of cell cycle	2025-01-11	91/28943	0.0340524	0.058515	0.0181943	Rb1	1
GO:0007091	BP	GO:0007091	metaphase/anaphase transition of mitotic cell cycle	2025-01-11	92/28943	0.0344207	0.0585554	0.0182069	Rb1	1
GO:0032024	BP	GO:0032024	positive regulation of insulin secretion	2025-01-11	92/28943	0.0344207	0.0585554	0.0182069	Hif1a	1
GO:0035050	BP	GO:0035050	embryonic heart tube development	2025-01-11	92/28943	0.0344207	0.0585554	0.0182069	Hif1a	1
GO:0045638	BP	GO:0045638	negative regulation of myeloid cell differentiation	2025-01-11	92/28943	0.0344207	0.0585554	0.0182069	Myc	1
GO:0061333	BP	GO:0061333	renal tubule morphogenesis	2025-01-11	92/28943	0.0344207	0.0585554	0.0182069	Myc	1
GO:1900182	BP	GO:1900182	positive regulation of protein localization to nucleus	2025-01-11	92/28943	0.0344207	0.0585554	0.0182069	Bag3	1
GO:0010965	BP	GO:0010965	regulation of mitotic sister chromatid separation	2025-01-11	93/28943	0.0347888	0.0589847	0.0183404	Rb1	1
GO:0070301	BP	GO:0070301	cellular response to hydrogen peroxide	2025-01-11	93/28943	0.0347888	0.0589847	0.0183404	Sphk1	1
GO:0032204	BP	GO:0032204	regulation of telomere maintenance	2025-01-11	94/28943	0.0351568	0.0595097	0.0185036	Myc	1
GO:0008589	BP	GO:0008589	regulation of smoothened signaling pathway	2025-01-11	95/28943	0.0355247	0.0597355	0.0185738	Rb1	1
GO:0043535	BP	GO:0043535	regulation of blood vessel endothelial cell migration	2025-01-11	95/28943	0.0355247	0.0597355	0.0185738	Hif1a	1
GO:0044784	BP	GO:0044784	metaphase/anaphase transition of cell cycle	2025-01-11	95/28943	0.0355247	0.0597355	0.0185738	Rb1	1
GO:0072655	BP	GO:0072655	establishment of protein localization to mitochondrion	2025-01-11	95/28943	0.0355247	0.0597355	0.0185738	Bag3	1
GO:0032651	BP	GO:0032651	regulation of interleukin-1 beta production	2025-01-11	96/28943	0.0358925	0.0600566	0.0186737	Sphk1	1
GO:0044728	BP	GO:0044728	DNA methylation or demethylation	2025-01-11	96/28943	0.0358925	0.0600566	0.0186737	Myc	1
GO:0051306	BP	GO:0051306	mitotic sister chromatid separation	2025-01-11	96/28943	0.0358925	0.0600566	0.0186737	Rb1	1
GO:0035773	BP	GO:0035773	insulin secretion involved in cellular response to glucose stimulus	2025-01-11	97/28943	0.0362601	0.0602758	0.0187418	Hif1a	1
GO:0045814	BP	GO:0045814	negative regulation of gene expression, epigenetic	2025-01-11	97/28943	0.0362601	0.0602758	0.0187418	Rb1	1
GO:0046364	BP	GO:0046364	monosaccharide biosynthetic process	2025-01-11	97/28943	0.0362601	0.0602758	0.0187418	Hif1a	1
GO:0070828	BP	GO:0070828	heterochromatin organization	2025-01-11	97/28943	0.0362601	0.0602758	0.0187418	Rb1	1
GO:0032091	BP	GO:0032091	negative regulation of protein binding	2025-01-11	98/28943	0.0366276	0.060492	0.018809	Myc	1
GO:1901222	BP	GO:1901222	regulation of NIK/NF-kappaB signaling	2025-01-11	98/28943	0.0366276	0.060492	0.018809	Sphk1	1
GO:1901992	BP	GO:1901992	positive regulation of mitotic cell cycle phase transition	2025-01-11	98/28943	0.0366276	0.060492	0.018809	Rb1	1
GO:1903321	BP	GO:1903321	negative regulation of protein modification by small protein conjugation or removal	2025-01-11	98/28943	0.0366276	0.060492	0.018809	Sqstm1	1
GO:0002532	BP	GO:0002532	production of molecular mediator involved in inflammatory response	2025-01-11	99/28943	0.036995	0.0607052	0.0188753	Hif1a	1
GO:0030148	BP	GO:0030148	sphingolipid biosynthetic process	2025-01-11	99/28943	0.036995	0.0607052	0.0188753	Sphk1	1
GO:0048864	BP	GO:0048864	stem cell development	2025-01-11	99/28943	0.036995	0.0607052	0.0188753	Hif1a	1
GO:1902882	BP	GO:1902882	regulation of response to oxidative stress	2025-01-11	99/28943	0.036995	0.0607052	0.0188753	Hif1a	1
GO:0014910	BP	GO:0014910	regulation of smooth muscle cell migration	2025-01-11	100/28943	0.0373623	0.061111	0.0190015	Myc	1
GO:2001243	BP	GO:2001243	negative regulation of intrinsic apoptotic signaling pathway	2025-01-11	100/28943	0.0373623	0.061111	0.0190015	Hif1a	1
GO:0006672	BP	GO:0006672	ceramide metabolic process	2025-01-11	101/28943	0.0377294	0.0613178	0.0190658	Sphk1	1
GO:0036473	BP	GO:0036473	cell death in response to oxidative stress	2025-01-11	101/28943	0.0377294	0.0613178	0.0190658	Hif1a	1
GO:0044264	BP	GO:0044264	cellular polysaccharide metabolic process	2025-01-11	101/28943	0.0377294	0.0613178	0.0190658	Gabarapl1	1
GO:0070585	BP	GO:0070585	protein localization to mitochondrion	2025-01-11	101/28943	0.0377294	0.0613178	0.0190658	Bag3	1
GO:0009408	BP	GO:0009408	response to heat	2025-01-11	102/28943	0.0380964	0.0615218	0.0191292	Bag3	1
GO:0014033	BP	GO:0014033	neural crest cell differentiation	2025-01-11	102/28943	0.0380964	0.0615218	0.0191292	Hif1a	1
GO:0032611	BP	GO:0032611	interleukin-1 beta production	2025-01-11	102/28943	0.0380964	0.0615218	0.0191292	Sphk1	1
GO:0033045	BP	GO:0033045	regulation of sister chromatid segregation	2025-01-11	102/28943	0.0380964	0.0615218	0.0191292	Rb1	1
GO:0042116	BP	GO:0042116	macrophage activation	2025-01-11	104/28943	0.03883	0.0626073	0.0194667	Sphk1	1
GO:0072080	BP	GO:0072080	nephron tubule development	2025-01-11	105/28943	0.0391966	0.0630985	0.0196195	Myc	1
GO:0006754	BP	GO:0006754	ATP biosynthetic process	2025-01-11	106/28943	0.0395631	0.0635752	0.0197677	Myc	1
GO:0001657	BP	GO:0001657	ureteric bud development	2025-01-11	107/28943	0.0399295	0.0635752	0.0197677	Myc	1
GO:0032006	BP	GO:0032006	regulation of TOR signaling	2025-01-11	107/28943	0.0399295	0.0635752	0.0197677	Hif1a	1
GO:0060993	BP	GO:0060993	kidney morphogenesis	2025-01-11	107/28943	0.0399295	0.0635752	0.0197677	Myc	1
GO:0070167	BP	GO:0070167	regulation of biomineral tissue development	2025-01-11	107/28943	0.0399295	0.0635752	0.0197677	Hif1a	1
GO:0071901	BP	GO:0071901	negative regulation of protein serine/threonine kinase activity	2025-01-11	107/28943	0.0399295	0.0635752	0.0197677	Rb1	1
GO:1905818	BP	GO:1905818	regulation of chromosome separation	2025-01-11	107/28943	0.0399295	0.0635752	0.0197677	Rb1	1
GO:0007006	BP	GO:0007006	mitochondrial membrane organization	2025-01-11	108/28943	0.0402957	0.063859	0.019856	Myc	1
GO:0034502	BP	GO:0034502	protein localization to chromosome	2025-01-11	108/28943	0.0402957	0.063859	0.019856	Rb1	1
GO:0045833	BP	GO:0045833	negative regulation of lipid metabolic process	2025-01-11	108/28943	0.0402957	0.063859	0.019856	Sphk1	1
GO:0006304	BP	GO:0006304	DNA modification	2025-01-11	109/28943	0.0406618	0.063942	0.0198818	Myc	1
GO:0033555	BP	GO:0033555	multicellular organismal response to stress	2025-01-11	109/28943	0.0406618	0.063942	0.0198818	Capn2	1
GO:0042310	BP	GO:0042310	vasoconstriction	2025-01-11	109/28943	0.0406618	0.063942	0.0198818	Hif1a	1
GO:0043255	BP	GO:0043255	regulation of carbohydrate biosynthetic process	2025-01-11	109/28943	0.0406618	0.063942	0.0198818	Hif1a	1
GO:0110149	BP	GO:0110149	regulation of biomineralization	2025-01-11	109/28943	0.0406618	0.063942	0.0198818	Hif1a	1
GO:0010595	BP	GO:0010595	positive regulation of endothelial cell migration	2025-01-11	110/28943	0.0410278	0.0641217	0.0199376	Hif1a	1
GO:0046889	BP	GO:0046889	positive regulation of lipid biosynthetic process	2025-01-11	110/28943	0.0410278	0.0641217	0.0199376	Capn2	1
GO:0072163	BP	GO:0072163	mesonephric epithelium development	2025-01-11	110/28943	0.0410278	0.0641217	0.0199376	Myc	1
GO:0072164	BP	GO:0072164	mesonephric tubule development	2025-01-11	110/28943	0.0410278	0.0641217	0.0199376	Myc	1
GO:0014909	BP	GO:0014909	smooth muscle cell migration	2025-01-11	111/28943	0.0413937	0.0644956	0.0200539	Myc	1
GO:0061326	BP	GO:0061326	renal tubule development	2025-01-11	111/28943	0.0413937	0.0644956	0.0200539	Myc	1
GO:1905477	BP	GO:1905477	positive regulation of protein localization to membrane	2025-01-11	112/28943	0.0417594	0.06494	0.0201921	Sqstm1	1
GO:0001823	BP	GO:0001823	mesonephros development	2025-01-11	113/28943	0.042125	0.06494	0.0201921	Myc	1
GO:0005976	BP	GO:0005976	polysaccharide metabolic process	2025-01-11	113/28943	0.042125	0.06494	0.0201921	Gabarapl1	1
GO:0008630	BP	GO:0008630	intrinsic apoptotic signaling pathway in response to DNA damage	2025-01-11	113/28943	0.042125	0.06494	0.0201921	Myc	1
GO:0021987	BP	GO:0021987	cerebral cortex development	2025-01-11	113/28943	0.042125	0.06494	0.0201921	Hif1a	1
GO:0043473	BP	GO:0043473	pigmentation	2025-01-11	113/28943	0.042125	0.06494	0.0201921	Myc	1
GO:1902106	BP	GO:1902106	negative regulation of leukocyte differentiation	2025-01-11	113/28943	0.042125	0.06494	0.0201921	Myc	1
GO:0010906	BP	GO:0010906	regulation of glucose metabolic process	2025-01-11	114/28943	0.0424905	0.0653059	0.0203058	Hif1a	1
GO:1903076	BP	GO:1903076	regulation of protein localization to plasma membrane	2025-01-11	114/28943	0.0424905	0.0653059	0.0203058	Sqstm1	1
GO:0018107	BP	GO:0018107	peptidyl-threonine phosphorylation	2025-01-11	115/28943	0.0428558	0.0657682	0.0204496	Sphk1	1
GO:0007589	BP	GO:0007589	body fluid secretion	2025-01-11	116/28943	0.043221	0.0660303	0.0205311	Hif1a	1
GO:1904035	BP	GO:1904035	regulation of epithelial cell apoptotic process	2025-01-11	116/28943	0.043221	0.0660303	0.0205311	Rb1	1
GO:1904659	BP	GO:1904659	glucose transmembrane transport	2025-01-11	116/28943	0.043221	0.0660303	0.0205311	Myc	1
GO:0006939	BP	GO:0006939	smooth muscle contraction	2025-01-11	117/28943	0.0435861	0.0660927	0.0205505	Sphk1	1
GO:0008645	BP	GO:0008645	hexose transmembrane transport	2025-01-11	117/28943	0.0435861	0.0660927	0.0205505	Myc	1
GO:0009206	BP	GO:0009206	purine ribonucleoside triphosphate biosynthetic process	2025-01-11	117/28943	0.0435861	0.0660927	0.0205505	Myc	1
GO:0032652	BP	GO:0032652	regulation of interleukin-1 production	2025-01-11	117/28943	0.0435861	0.0660927	0.0205505	Sphk1	1
GO:1903707	BP	GO:1903707	negative regulation of hemopoiesis	2025-01-11	117/28943	0.0435861	0.0660927	0.0205505	Myc	1
GO:0001892	BP	GO:0001892	embryonic placenta development	2025-01-11	118/28943	0.0439511	0.0662517	0.0205999	Hif1a	1
GO:0009145	BP	GO:0009145	purine nucleoside triphosphate biosynthetic process	2025-01-11	118/28943	0.0439511	0.0662517	0.0205999	Myc	1
GO:0019751	BP	GO:0019751	polyol metabolic process	2025-01-11	118/28943	0.0439511	0.0662517	0.0205999	Sphk1	1
GO:0038061	BP	GO:0038061	NIK/NF-kappaB signaling	2025-01-11	118/28943	0.0439511	0.0662517	0.0205999	Sphk1	1
GO:0006906	BP	GO:0006906	vesicle fusion	2025-01-11	119/28943	0.0443159	0.0663112	0.0206184	Sphk1	1
GO:0008637	BP	GO:0008637	apoptotic mitochondrial changes	2025-01-11	119/28943	0.0443159	0.0663112	0.0206184	Tnfsf10	1
GO:0014020	BP	GO:0014020	primary neural tube formation	2025-01-11	119/28943	0.0443159	0.0663112	0.0206184	Hif1a	1
GO:0045445	BP	GO:0045445	myoblast differentiation	2025-01-11	119/28943	0.0443159	0.0663112	0.0206184	Rb1	1
GO:1901989	BP	GO:1901989	positive regulation of cell cycle phase transition	2025-01-11	119/28943	0.0443159	0.0663112	0.0206184	Rb1	1
GO:0008306	BP	GO:0008306	associative learning	2025-01-11	120/28943	0.0446807	0.0665637	0.0206969	Hif1a	1
GO:0015749	BP	GO:0015749	monosaccharide transmembrane transport	2025-01-11	120/28943	0.0446807	0.0665637	0.0206969	Myc	1
GO:0072009	BP	GO:0072009	nephron epithelium development	2025-01-11	120/28943	0.0446807	0.0665637	0.0206969	Myc	1
GO:0090174	BP	GO:0090174	organelle membrane fusion	2025-01-11	121/28943	0.0450452	0.0670089	0.0208354	Sphk1	1
GO:0009201	BP	GO:0009201	ribonucleoside triphosphate biosynthetic process	2025-01-11	122/28943	0.0454097	0.0670616	0.0208517	Myc	1
GO:0009636	BP	GO:0009636	response to toxic substance	2025-01-11	122/28943	0.0454097	0.0670616	0.0208517	Hif1a	1
GO:0042542	BP	GO:0042542	response to hydrogen peroxide	2025-01-11	122/28943	0.0454097	0.0670616	0.0208517	Sphk1	1
GO:0043534	BP	GO:0043534	blood vessel endothelial cell migration	2025-01-11	122/28943	0.0454097	0.0670616	0.0208517	Hif1a	1
GO:0046928	BP	GO:0046928	regulation of neurotransmitter secretion	2025-01-11	122/28943	0.0454097	0.0670616	0.0208517	Sphk1	1
GO:0001676	BP	GO:0001676	long-chain fatty acid metabolic process	2025-01-11	123/28943	0.045774	0.06721	0.0208979	Sphk1	1
GO:0018210	BP	GO:0018210	peptidyl-threonine modification	2025-01-11	123/28943	0.045774	0.06721	0.0208979	Sphk1	1
GO:0032612	BP	GO:0032612	interleukin-1 production	2025-01-11	123/28943	0.045774	0.06721	0.0208979	Sphk1	1
GO:0050764	BP	GO:0050764	regulation of phagocytosis	2025-01-11	123/28943	0.045774	0.06721	0.0208979	Sphk1	1
GO:0015718	BP	GO:0015718	monocarboxylic acid transport	2025-01-11	124/28943	0.0461382	0.0675501	0.0210036	Myc	1
GO:0032963	BP	GO:0032963	collagen metabolic process	2025-01-11	124/28943	0.0461382	0.0675501	0.0210036	Hif1a	1
GO:0006352	BP	GO:0006352	DNA-templated transcription initiation	2025-01-11	125/28943	0.0465023	0.0676941	0.0210484	Myc	1
GO:0031398	BP	GO:0031398	positive regulation of protein ubiquitination	2025-01-11	125/28943	0.0465023	0.0676941	0.0210484	Sphk1	1
GO:0090277	BP	GO:0090277	positive regulation of peptide hormone secretion	2025-01-11	125/28943	0.0465023	0.0676941	0.0210484	Hif1a	1
GO:2000177	BP	GO:2000177	regulation of neural precursor cell proliferation	2025-01-11	125/28943	0.0465023	0.0676941	0.0210484	Hif1a	1
GO:0014812	BP	GO:0014812	muscle cell migration	2025-01-11	126/28943	0.0468663	0.0680296	0.0211527	Myc	1
GO:0051983	BP	GO:0051983	regulation of chromosome segregation	2025-01-11	126/28943	0.0468663	0.0680296	0.0211527	Rb1	1
GO:0034219	BP	GO:0034219	carbohydrate transmembrane transport	2025-01-11	127/28943	0.0472301	0.0684602	0.0212866	Myc	1
GO:0043123	BP	GO:0043123	positive regulation of I-kappaB kinase/NF-kappaB signaling	2025-01-11	128/28943	0.0475938	0.0688893	0.0214201	Tnfsf10	1
GO:0002793	BP	GO:0002793	positive regulation of peptide secretion	2025-01-11	129/28943	0.0479574	0.069219	0.0215226	Hif1a	1
GO:2000278	BP	GO:2000278	regulation of DNA biosynthetic process	2025-01-11	129/28943	0.0479574	0.069219	0.0215226	Myc	1
GO:0030282	BP	GO:0030282	bone mineralization	2025-01-11	131/28943	0.0486842	0.0700694	0.021787	Hif1a	1
GO:0031929	BP	GO:0031929	TOR signaling	2025-01-11	131/28943	0.0486842	0.0700694	0.021787	Hif1a	1
GO:0001776	BP	GO:0001776	leukocyte homeostasis	2025-01-11	132/28943	0.0490474	0.0700972	0.0217956	Hif1a	1
GO:0007368	BP	GO:0007368	determination of left/right symmetry	2025-01-11	132/28943	0.0490474	0.0700972	0.0217956	Hif1a	1
GO:0009142	BP	GO:0009142	nucleoside triphosphate biosynthetic process	2025-01-11	132/28943	0.0490474	0.0700972	0.0217956	Myc	1
GO:0046822	BP	GO:0046822	regulation of nucleocytoplasmic transport	2025-01-11	132/28943	0.0490474	0.0700972	0.0217956	Bag3	1
GO:0051304	BP	GO:0051304	chromosome separation	2025-01-11	132/28943	0.0490474	0.0700972	0.0217956	Rb1	1
GO:0033559	BP	GO:0033559	unsaturated fatty acid metabolic process	2025-01-11	133/28943	0.0494104	0.0704185	0.0218955	Sphk1	1
GO:1901216	BP	GO:1901216	positive regulation of neuron death	2025-01-11	133/28943	0.0494104	0.0704185	0.0218955	Capn2	1
GO:0001841	BP	GO:0001841	neural tube formation	2025-01-11	134/28943	0.0497734	0.0706394	0.0219642	Hif1a	1
GO:0010212	BP	GO:0010212	response to ionizing radiation	2025-01-11	134/28943	0.0497734	0.0706394	0.0219642	Myc	1
GO:0046467	BP	GO:0046467	membrane lipid biosynthetic process	2025-01-11	134/28943	0.0497734	0.0706394	0.0219642	Sphk1	1
GO:0009582	BP	GO:0009582	detection of abiotic stimulus	2025-01-11	136/28943	0.0504989	0.0715694	0.0222534	Myc	1
GO:0009581	BP	GO:0009581	detection of external stimulus	2025-01-11	137/28943	0.0508615	0.0719831	0.022382	Myc	1
GO:0032874	BP	GO:0032874	positive regulation of stress-activated MAPK cascade	2025-01-11	138/28943	0.0512239	0.0723955	0.0225103	Sphk1	1
GO:0051588	BP	GO:0051588	regulation of neurotransmitter transport	2025-01-11	139/28943	0.0515862	0.0728066	0.0226381	Sphk1	1
GO:0006119	BP	GO:0006119	oxidative phosphorylation	2025-01-11	140/28943	0.0519484	0.0729138	0.0226714	Myc	1
GO:0030278	BP	GO:0030278	regulation of ossification	2025-01-11	140/28943	0.0519484	0.0729138	0.0226714	Hif1a	1
GO:0070304	BP	GO:0070304	positive regulation of stress-activated protein kinase signaling cascade	2025-01-11	140/28943	0.0519484	0.0729138	0.0226714	Sphk1	1
GO:1905039	BP	GO:1905039	carboxylic acid transmembrane transport	2025-01-11	140/28943	0.0519484	0.0729138	0.0226714	Myc	1
GO:0009855	BP	GO:0009855	determination of bilateral symmetry	2025-01-11	141/28943	0.0523105	0.0730197	0.0227043	Hif1a	1
GO:0046165	BP	GO:0046165	alcohol biosynthetic process	2025-01-11	141/28943	0.0523105	0.0730197	0.0227043	Sphk1	1
GO:1903825	BP	GO:1903825	organic acid transmembrane transport	2025-01-11	141/28943	0.0523105	0.0730197	0.0227043	Myc	1
GO:1904375	BP	GO:1904375	regulation of protein localization to cell periphery	2025-01-11	141/28943	0.0523105	0.0730197	0.0227043	Sqstm1	1
GO:0006690	BP	GO:0006690	icosanoid metabolic process	2025-01-11	142/28943	0.0526724	0.073224	0.0227679	Sphk1	1
GO:0009799	BP	GO:0009799	specification of symmetry	2025-01-11	142/28943	0.0526724	0.073224	0.0227679	Hif1a	1
GO:0051224	BP	GO:0051224	negative regulation of protein transport	2025-01-11	142/28943	0.0526724	0.073224	0.0227679	Bag3	1
GO:0034614	BP	GO:0034614	cellular response to reactive oxygen species	2025-01-11	143/28943	0.0530342	0.0736266	0.022893	Sphk1	1
GO:0000723	BP	GO:0000723	telomere maintenance	2025-01-11	144/28943	0.0533959	0.0739272	0.0229865	Myc	1
GO:0042471	BP	GO:0042471	ear morphogenesis	2025-01-11	144/28943	0.0533959	0.0739272	0.0229865	Myc	1
GO:0090316	BP	GO:0090316	positive regulation of intracellular protein transport	2025-01-11	145/28943	0.0537575	0.0743268	0.0231108	Bag3	1
GO:0002065	BP	GO:0002065	columnar/cuboidal epithelial cell differentiation	2025-01-11	146/28943	0.0541189	0.0745232	0.0231718	Hif1a	1
GO:0006665	BP	GO:0006665	sphingolipid metabolic process	2025-01-11	146/28943	0.0541189	0.0745232	0.0231718	Sphk1	1
GO:1904950	BP	GO:1904950	negative regulation of establishment of protein localization	2025-01-11	146/28943	0.0541189	0.0745232	0.0231718	Bag3	1
GO:0010469	BP	GO:0010469	regulation of signaling receptor activity	2025-01-11	147/28943	0.0544802	0.0746174	0.0232011	Hif1a	1
GO:0050728	BP	GO:0050728	negative regulation of inflammatory response	2025-01-11	147/28943	0.0544802	0.0746174	0.0232011	Rb1	1
GO:0120161	BP	GO:0120161	regulation of cold-induced thermogenesis	2025-01-11	147/28943	0.0544802	0.0746174	0.0232011	Rb1	1
GO:1903322	BP	GO:1903322	positive regulation of protein modification by small protein conjugation or removal	2025-01-11	147/28943	0.0544802	0.0746174	0.0232011	Sphk1	1
GO:1904019	BP	GO:1904019	epithelial cell apoptotic process	2025-01-11	148/28943	0.0548414	0.0750113	0.0233236	Rb1	1
GO:0032200	BP	GO:0032200	telomere organization	2025-01-11	149/28943	0.0552025	0.0752023	0.023383	Myc	1
GO:0034763	BP	GO:0034763	negative regulation of transmembrane transport	2025-01-11	149/28943	0.0552025	0.0752023	0.023383	Myc	1
GO:0106106	BP	GO:0106106	cold-induced thermogenesis	2025-01-11	149/28943	0.0552025	0.0752023	0.023383	Rb1	1
GO:0072331	BP	GO:0072331	signal transduction by p53 class mediator	2025-01-11	150/28943	0.0555634	0.075593	0.0235044	Myc	1
GO:0003206	BP	GO:0003206	cardiac chamber morphogenesis	2025-01-11	151/28943	0.0559242	0.0758812	0.0235941	Hif1a	1
GO:1900180	BP	GO:1900180	regulation of protein localization to nucleus	2025-01-11	151/28943	0.0559242	0.0758812	0.0235941	Bag3	1
GO:0003231	BP	GO:0003231	cardiac ventricle development	2025-01-11	152/28943	0.0562849	0.0762691	0.0237147	Hif1a	1
GO:0071333	BP	GO:0071333	cellular response to glucose stimulus	2025-01-11	153/28943	0.0566455	0.0766557	0.0238349	Hif1a	1
GO:0006633	BP	GO:0006633	fatty acid biosynthetic process	2025-01-11	154/28943	0.0570059	0.076916	0.0239158	Sphk1	1
GO:0006839	BP	GO:0006839	mitochondrial transport	2025-01-11	154/28943	0.0570059	0.076916	0.0239158	Bag3	1
GO:0001837	BP	GO:0001837	epithelial to mesenchymal transition	2025-01-11	155/28943	0.0573662	0.076916	0.0239158	Hif1a	1
GO:0048284	BP	GO:0048284	organelle fusion	2025-01-11	155/28943	0.0573662	0.076916	0.0239158	Sphk1	1
GO:0051092	BP	GO:0051092	positive regulation of NF-kappaB transcription factor activity	2025-01-11	155/28943	0.0573662	0.076916	0.0239158	Sphk1	1
GO:0071331	BP	GO:0071331	cellular response to hexose stimulus	2025-01-11	155/28943	0.0573662	0.076916	0.0239158	Hif1a	1
GO:0072073	BP	GO:0072073	kidney epithelium development	2025-01-11	155/28943	0.0573662	0.076916	0.0239158	Myc	1
GO:0008643	BP	GO:0008643	carbohydrate transport	2025-01-11	156/28943	0.0577264	0.0771958	0.0240028	Myc	1
GO:0071326	BP	GO:0071326	cellular response to monosaccharide stimulus	2025-01-11	156/28943	0.0577264	0.0771958	0.0240028	Hif1a	1
GO:0048593	BP	GO:0048593	camera-type eye morphogenesis	2025-01-11	157/28943	0.0580865	0.0775755	0.0241209	Hif1a	1
GO:0001838	BP	GO:0001838	embryonic epithelial tube formation	2025-01-11	159/28943	0.0588062	0.0784339	0.0243878	Hif1a	1
GO:0010634	BP	GO:0010634	positive regulation of epithelial cell migration	2025-01-11	160/28943	0.0591659	0.0788105	0.0245049	Hif1a	1
GO:0001824	BP	GO:0001824	blastocyst development	2025-01-11	161/28943	0.0595254	0.078877	0.0245256	Capn2	1
GO:0006865	BP	GO:0006865	amino acid transport	2025-01-11	161/28943	0.0595254	0.078877	0.0245256	Myc	1
GO:0072006	BP	GO:0072006	nephron development	2025-01-11	161/28943	0.0595254	0.078877	0.0245256	Myc	1
GO:2000377	BP	GO:2000377	regulation of reactive oxygen species metabolic process	2025-01-11	161/28943	0.0595254	0.078877	0.0245256	Hif1a	1
GO:0007224	BP	GO:0007224	smoothened signaling pathway	2025-01-11	162/28943	0.0598849	0.0792503	0.0246416	Rb1	1
GO:0071322	BP	GO:0071322	cellular response to carbohydrate stimulus	2025-01-11	164/28943	0.0606034	0.0799933	0.0248727	Hif1a	1
GO:2001236	BP	GO:2001236	regulation of extrinsic apoptotic signaling pathway	2025-01-11	164/28943	0.0606034	0.0799933	0.0248727	Tnfsf10	1
GO:0030879	BP	GO:0030879	mammary gland development	2025-01-11	165/28943	0.0609624	0.0801558	0.0249232	Hif1a	1
GO:0050714	BP	GO:0050714	positive regulation of protein secretion	2025-01-11	165/28943	0.0609624	0.0801558	0.0249232	Hif1a	1
GO:1990845	BP	GO:1990845	adaptive thermogenesis	2025-01-11	165/28943	0.0609624	0.0801558	0.0249232	Rb1	1
GO:0120254	BP	GO:0120254	olefinic compound metabolic process	2025-01-11	166/28943	0.0613214	0.0805238	0.0250376	Sphk1	1
GO:0006937	BP	GO:0006937	regulation of muscle contraction	2025-01-11	167/28943	0.0616802	0.0805796	0.025055	Sphk1	1
GO:0010675	BP	GO:0010675	regulation of cellular carbohydrate metabolic process	2025-01-11	167/28943	0.0616802	0.0805796	0.025055	Hif1a	1
GO:0021543	BP	GO:0021543	pallium development	2025-01-11	167/28943	0.0616802	0.0805796	0.025055	Hif1a	1
GO:0032675	BP	GO:0032675	regulation of interleukin-6 production	2025-01-11	167/28943	0.0616802	0.0805796	0.025055	Capn2	1
GO:0046474	BP	GO:0046474	glycerophospholipid biosynthetic process	2025-01-11	168/28943	0.0620389	0.0807377	0.0251041	Capn2	1
GO:0050768	BP	GO:0050768	negative regulation of neurogenesis	2025-01-11	168/28943	0.0620389	0.0807377	0.0251041	Rb1	1
GO:0051168	BP	GO:0051168	nuclear export	2025-01-11	168/28943	0.0620389	0.0807377	0.0251041	Bag3	1
GO:0046887	BP	GO:0046887	positive regulation of hormone secretion	2025-01-11	169/28943	0.0623974	0.0811007	0.025217	Hif1a	1
GO:0043433	BP	GO:0043433	negative regulation of DNA-binding transcription factor activity	2025-01-11	170/28943	0.0627559	0.0812557	0.0252652	Rb1	1
GO:0072175	BP	GO:0072175	epithelial tube formation	2025-01-11	170/28943	0.0627559	0.0812557	0.0252652	Hif1a	1
GO:2000045	BP	GO:2000045	regulation of G1/S transition of mitotic cell cycle	2025-01-11	170/28943	0.0627559	0.0812557	0.0252652	Rb1	1
GO:0061025	BP	GO:0061025	membrane fusion	2025-01-11	171/28943	0.0631142	0.0816159	0.0253772	Sphk1	1
GO:0051961	BP	GO:0051961	negative regulation of nervous system development	2025-01-11	172/28943	0.0634724	0.0818713	0.0254566	Rb1	1
GO:2001022	BP	GO:2001022	positive regulation of response to DNA damage stimulus	2025-01-11	172/28943	0.0634724	0.0818713	0.0254566	Myc	1
GO:0001678	BP	GO:0001678	cellular glucose homeostasis	2025-01-11	173/28943	0.0638304	0.0819184	0.0254712	Hif1a	1
GO:0035296	BP	GO:0035296	regulation of tube diameter	2025-01-11	173/28943	0.0638304	0.0819184	0.0254712	Hif1a	1
GO:0071230	BP	GO:0071230	cellular response to amino acid stimulus	2025-01-11	173/28943	0.0638304	0.0819184	0.0254712	Capn2	1
GO:0097746	BP	GO:0097746	blood vessel diameter maintenance	2025-01-11	173/28943	0.0638304	0.0819184	0.0254712	Hif1a	1
GO:0009266	BP	GO:0009266	response to temperature stimulus	2025-01-11	174/28943	0.0641884	0.0821708	0.0255497	Bag3	1
GO:0035150	BP	GO:0035150	regulation of tube size	2025-01-11	174/28943	0.0641884	0.0821708	0.0255497	Hif1a	1
GO:0010970	BP	GO:0010970	transport along microtubule	2025-01-11	175/28943	0.0645462	0.0825252	0.0256599	Hif1a	1
GO:0010594	BP	GO:0010594	regulation of endothelial cell migration	2025-01-11	176/28943	0.0649039	0.0827748	0.0257375	Hif1a	1
GO:0032635	BP	GO:0032635	interleukin-6 production	2025-01-11	176/28943	0.0649039	0.0827748	0.0257375	Capn2	1
GO:0040029	BP	GO:0040029	epigenetic regulation of gene expression	2025-01-11	177/28943	0.0652614	0.083023	0.0258147	Rb1	1
GO:0051100	BP	GO:0051100	negative regulation of binding	2025-01-11	177/28943	0.0652614	0.083023	0.0258147	Myc	1
GO:0031214	BP	GO:0031214	biomineral tissue development	2025-01-11	179/28943	0.0659762	0.0838276	0.0260649	Hif1a	1
GO:0001890	BP	GO:0001890	placenta development	2025-01-11	180/28943	0.0663334	0.0839673	0.0261083	Hif1a	1
GO:0050906	BP	GO:0050906	detection of stimulus involved in sensory perception	2025-01-11	180/28943	0.0663334	0.0839673	0.0261083	Myc	1
GO:1902905	BP	GO:1902905	positive regulation of supramolecular fiber organization	2025-01-11	180/28943	0.0663334	0.0839673	0.0261083	Rb1	1
GO:1901991	BP	GO:1901991	negative regulation of mitotic cell cycle phase transition	2025-01-11	181/28943	0.0666904	0.0843146	0.0262163	Rb1	1
GO:0060041	BP	GO:0060041	retina development in camera-type eye	2025-01-11	183/28943	0.0674042	0.085006	0.0264313	Hif1a	1
GO:0071356	BP	GO:0071356	cellular response to tumor necrosis factor	2025-01-11	183/28943	0.0674042	0.085006	0.0264313	Sphk1	1
GO:0035148	BP	GO:0035148	tube formation	2025-01-11	185/28943	0.0681175	0.0857994	0.026678	Hif1a	1
GO:0007269	BP	GO:0007269	neurotransmitter secretion	2025-01-11	186/28943	0.0684739	0.0859768	0.0267331	Sphk1	1
GO:0099643	BP	GO:0099643	signal release from synapse	2025-01-11	186/28943	0.0684739	0.0859768	0.0267331	Sphk1	1
GO:0007612	BP	GO:0007612	learning	2025-01-11	187/28943	0.0688302	0.0859768	0.0267331	Hif1a	1
GO:0032388	BP	GO:0032388	positive regulation of intracellular transport	2025-01-11	187/28943	0.0688302	0.0859768	0.0267331	Bag3	1
GO:0048592	BP	GO:0048592	eye morphogenesis	2025-01-11	187/28943	0.0688302	0.0859768	0.0267331	Hif1a	1
GO:0071229	BP	GO:0071229	cellular response to acid chemical	2025-01-11	187/28943	0.0688302	0.0859768	0.0267331	Capn2	1
GO:0006643	BP	GO:0006643	membrane lipid metabolic process	2025-01-11	188/28943	0.0691864	0.0859768	0.0267331	Sphk1	1
GO:0016331	BP	GO:0016331	morphogenesis of embryonic epithelium	2025-01-11	188/28943	0.0691864	0.0859768	0.0267331	Hif1a	1
GO:0043200	BP	GO:0043200	response to amino acid	2025-01-11	188/28943	0.0691864	0.0859768	0.0267331	Capn2	1
GO:0045834	BP	GO:0045834	positive regulation of lipid metabolic process	2025-01-11	188/28943	0.0691864	0.0859768	0.0267331	Capn2	1
GO:0110148	BP	GO:0110148	biomineralization	2025-01-11	188/28943	0.0691864	0.0859768	0.0267331	Hif1a	1
GO:0000070	BP	GO:0000070	mitotic sister chromatid segregation	2025-01-11	190/28943	0.0698985	0.0866503	0.0269425	Rb1	1
GO:0050680	BP	GO:0050680	negative regulation of epithelial cell proliferation	2025-01-11	190/28943	0.0698985	0.0866503	0.0269425	Rb1	1
GO:0046631	BP	GO:0046631	alpha-beta T cell activation	2025-01-11	191/28943	0.0702543	0.0867747	0.0269812	Myc	1
GO:0048754	BP	GO:0048754	branching morphogenesis of an epithelial tube	2025-01-11	191/28943	0.0702543	0.0867747	0.0269812	Myc	1
GO:0050796	BP	GO:0050796	regulation of insulin secretion	2025-01-11	191/28943	0.0702543	0.0867747	0.0269812	Hif1a	1
GO:0050821	BP	GO:0050821	protein stabilization	2025-01-11	193/28943	0.0709656	0.0875471	0.0272214	Bag3	1
GO:0009749	BP	GO:0009749	response to glucose	2025-01-11	194/28943	0.071321	0.0878792	0.0273247	Hif1a	1
GO:0043524	BP	GO:0043524	negative regulation of neuron apoptotic process	2025-01-11	195/28943	0.0716764	0.088104	0.0273946	Hif1a	1
GO:1902806	BP	GO:1902806	regulation of cell cycle G1/S phase transition	2025-01-11	195/28943	0.0716764	0.088104	0.0273946	Rb1	1
GO:0019722	BP	GO:0019722	calcium-mediated signaling	2025-01-11	196/28943	0.0720316	0.0884339	0.0274972	Sphk1	1
GO:0009746	BP	GO:0009746	response to hexose	2025-01-11	197/28943	0.0723867	0.0887629	0.0275994	Hif1a	1
GO:0051302	BP	GO:0051302	regulation of cell division	2025-01-11	198/28943	0.0727416	0.089091	0.0277015	Myc	1
GO:0003205	BP	GO:0003205	cardiac chamber development	2025-01-11	199/28943	0.0730965	0.0894181	0.0278032	Hif1a	1
GO:0009152	BP	GO:0009152	purine ribonucleotide biosynthetic process	2025-01-11	200/28943	0.0734512	0.0894226	0.0278046	Myc	1
GO:0021915	BP	GO:0021915	neural tube development	2025-01-11	200/28943	0.0734512	0.0894226	0.0278046	Hif1a	1
GO:0030308	BP	GO:0030308	negative regulation of cell growth	2025-01-11	200/28943	0.0734512	0.0894226	0.0278046	Rb1	1
GO:0034284	BP	GO:0034284	response to monosaccharide	2025-01-11	200/28943	0.0734512	0.0894226	0.0278046	Hif1a	1
GO:1905475	BP	GO:1905475	regulation of protein localization to membrane	2025-01-11	201/28943	0.0738058	0.0897471	0.0279055	Sqstm1	1
GO:0006469	BP	GO:0006469	negative regulation of protein kinase activity	2025-01-11	202/28943	0.0741602	0.0898565	0.0279395	Rb1	1
GO:0034612	BP	GO:0034612	response to tumor necrosis factor	2025-01-11	202/28943	0.0741602	0.0898565	0.0279395	Sphk1	1
GO:0098656	BP	GO:0098656	anion transmembrane transport	2025-01-11	202/28943	0.0741602	0.0898565	0.0279395	Myc	1
GO:0048771	BP	GO:0048771	tissue remodeling	2025-01-11	203/28943	0.0745146	0.0901786	0.0280396	Hif1a	1
GO:0032872	BP	GO:0032872	regulation of stress-activated MAPK cascade	2025-01-11	204/28943	0.0748688	0.0904998	0.0281395	Sphk1	1
GO:0016051	BP	GO:0016051	carbohydrate biosynthetic process	2025-01-11	205/28943	0.0752229	0.0908201	0.0282391	Hif1a	1
GO:0061351	BP	GO:0061351	neural precursor cell proliferation	2025-01-11	206/28943	0.0755769	0.0911395	0.0283384	Hif1a	1
GO:0030705	BP	GO:0030705	cytoskeleton-dependent intracellular transport	2025-01-11	207/28943	0.0759307	0.09135	0.0284038	Hif1a	1
GO:0070302	BP	GO:0070302	regulation of stress-activated protein kinase signaling cascade	2025-01-11	207/28943	0.0759307	0.09135	0.0284038	Sphk1	1
GO:0019827	BP	GO:0019827	stem cell population maintenance	2025-01-11	208/28943	0.0762845	0.0916673	0.0285025	Myc	1
GO:0001101	BP	GO:0001101	response to acid chemical	2025-01-11	209/28943	0.0766381	0.0918755	0.0285673	Capn2	1
GO:0072330	BP	GO:0072330	monocarboxylic acid biosynthetic process	2025-01-11	209/28943	0.0766381	0.0918755	0.0285673	Sphk1	1
GO:1902107	BP	GO:1902107	positive regulation of leukocyte differentiation	2025-01-11	210/28943	0.0769915	0.0920826	0.0286316	Rb1	1
GO:1903708	BP	GO:1903708	positive regulation of hemopoiesis	2025-01-11	210/28943	0.0769915	0.0920826	0.0286316	Rb1	1
GO:0010721	BP	GO:0010721	negative regulation of cell development	2025-01-11	211/28943	0.0773449	0.0922886	0.0286957	Rb1	1
GO:0030307	BP	GO:0030307	positive regulation of cell growth	2025-01-11	211/28943	0.0773449	0.0922886	0.0286957	Sphk1	1
GO:0009260	BP	GO:0009260	ribonucleotide biosynthetic process	2025-01-11	212/28943	0.0776981	0.0923855	0.0287258	Myc	1
GO:0032869	BP	GO:0032869	cellular response to insulin stimulus	2025-01-11	212/28943	0.0776981	0.0923855	0.0287258	Rb1	1
GO:0071824	BP	GO:0071824	protein-DNA complex subunit organization	2025-01-11	212/28943	0.0776981	0.0923855	0.0287258	Myc	1
GO:0034249	BP	GO:0034249	negative regulation of cellular amide metabolic process	2025-01-11	213/28943	0.0780513	0.0925893	0.0287892	Sphk1	1
GO:0098727	BP	GO:0098727	maintenance of cell number	2025-01-11	213/28943	0.0780513	0.0925893	0.0287892	Myc	1
GO:0009743	BP	GO:0009743	response to carbohydrate	2025-01-11	214/28943	0.0784043	0.092792	0.0288522	Hif1a	1
GO:0045017	BP	GO:0045017	glycerolipid biosynthetic process	2025-01-11	214/28943	0.0784043	0.092792	0.0288522	Capn2	1
GO:0099111	BP	GO:0099111	microtubule-based transport	2025-01-11	216/28943	0.0791099	0.0935185	0.0290781	Hif1a	1
GO:0006164	BP	GO:0006164	purine nucleotide biosynthetic process	2025-01-11	217/28943	0.0794625	0.0938265	0.0291739	Myc	1
GO:0000819	BP	GO:0000819	sister chromatid segregation	2025-01-11	219/28943	0.0801674	0.0945492	0.0293986	Rb1	1
GO:0043393	BP	GO:0043393	regulation of protein binding	2025-01-11	221/28943	0.0808718	0.09505	0.0295543	Myc	1
GO:0046390	BP	GO:0046390	ribose phosphate biosynthetic process	2025-01-11	221/28943	0.0808718	0.09505	0.0295543	Myc	1
GO:1903828	BP	GO:1903828	negative regulation of protein localization	2025-01-11	221/28943	0.0808718	0.09505	0.0295543	Bag3	1
GO:0008654	BP	GO:0008654	phospholipid biosynthetic process	2025-01-11	223/28943	0.0815756	0.0957668	0.0297772	Capn2	1
GO:0072522	BP	GO:0072522	purine-containing compound biosynthetic process	2025-01-11	225/28943	0.0822791	0.0964814	0.0299994	Myc	1
GO:0033673	BP	GO:0033673	negative regulation of kinase activity	2025-01-11	226/28943	0.0826306	0.0967822	0.0300929	Rb1	1
GO:0010976	BP	GO:0010976	positive regulation of neuron projection development	2025-01-11	227/28943	0.082982	0.0970822	0.0301862	Sphk1	1
GO:0033157	BP	GO:0033157	regulation of intracellular protein transport	2025-01-11	228/28943	0.0833332	0.0973814	0.0302792	Bag3	1
GO:0061138	BP	GO:0061138	morphogenesis of a branching epithelium	2025-01-11	229/28943	0.0836844	0.0976797	0.030372	Myc	1
GO:0050679	BP	GO:0050679	positive regulation of epithelial cell proliferation	2025-01-11	232/28943	0.0847371	0.0987953	0.0307189	Myc	1
GO:0006473	BP	GO:0006473	protein acetylation	2025-01-11	234/28943	0.0854383	0.0992721	0.0308671	Sphk1	1
GO:0043542	BP	GO:0043542	endothelial cell migration	2025-01-11	234/28943	0.0854383	0.0992721	0.0308671	Hif1a	1
GO:1901617	BP	GO:1901617	organic hydroxy compound biosynthetic process	2025-01-11	234/28943	0.0854383	0.0992721	0.0308671	Sphk1	1
GO:0003018	BP	GO:0003018	vascular process in circulatory system	2025-01-11	235/28943	0.0857887	0.0993395	0.0308881	Hif1a	1
GO:0030073	BP	GO:0030073	insulin secretion	2025-01-11	235/28943	0.0857887	0.0993395	0.0308881	Hif1a	1
GO:0090276	BP	GO:0090276	regulation of peptide hormone secretion	2025-01-11	235/28943	0.0857887	0.0993395	0.0308881	Hif1a	1
GO:0030100	BP	GO:0030100	regulation of endocytosis	2025-01-11	236/28943	0.086139	0.0996319	0.030979	Sphk1	1
GO:0042098	BP	GO:0042098	T cell proliferation	2025-01-11	237/28943	0.0864892	0.0999235	0.0310696	Myc	1
GO:0032984	BP	GO:0032984	protein-containing complex disassembly	2025-01-11	238/28943	0.0868393	0.100214	0.0311601	Myc	1
GO:0042445	BP	GO:0042445	hormone metabolic process	2025-01-11	239/28943	0.0871892	0.100504	0.0312502	Hif1a	1
GO:0002791	BP	GO:0002791	regulation of peptide secretion	2025-01-11	240/28943	0.087539	0.100794	0.0313402	Hif1a	1
GO:0045930	BP	GO:0045930	negative regulation of mitotic cell cycle	2025-01-11	241/28943	0.0878887	0.101082	0.0314298	Rb1	1
GO:0090087	BP	GO:0090087	regulation of peptide transport	2025-01-11	242/28943	0.0882383	0.10137	0.0315193	Hif1a	1
GO:0006836	BP	GO:0006836	neurotransmitter transport	2025-01-11	243/28943	0.0885877	0.101656	0.0316085	Sphk1	1
GO:0031348	BP	GO:0031348	negative regulation of defense response	2025-01-11	244/28943	0.088937	0.101828	0.0316618	Rb1	1
GO:0051403	BP	GO:0051403	stress-activated MAPK cascade	2025-01-11	244/28943	0.088937	0.101828	0.0316618	Sphk1	1
GO:0002064	BP	GO:0002064	epithelial cell development	2025-01-11	245/28943	0.0892862	0.101884	0.0316793	Hif1a	1
GO:0048762	BP	GO:0048762	mesenchymal cell differentiation	2025-01-11	245/28943	0.0892862	0.101884	0.0316793	Hif1a	1
GO:0072593	BP	GO:0072593	reactive oxygen species metabolic process	2025-01-11	245/28943	0.0892862	0.101884	0.0316793	Hif1a	1
GO:0010632	BP	GO:0010632	regulation of epithelial cell migration	2025-01-11	248/28943	0.0903331	0.102964	0.0320149	Hif1a	1
GO:0001763	BP	GO:0001763	morphogenesis of a branching structure	2025-01-11	249/28943	0.0906818	0.103246	0.0321026	Myc	1
GO:0032868	BP	GO:0032868	response to insulin	2025-01-11	250/28943	0.0910304	0.103527	0.03219	Rb1	1
GO:0031098	BP	GO:0031098	stress-activated protein kinase signaling cascade	2025-01-11	254/28943	0.0924236	0.10476	0.0325736	Sphk1	1
GO:0043583	BP	GO:0043583	ear development	2025-01-11	254/28943	0.0924236	0.10476	0.0325736	Myc	1
GO:0060291	BP	GO:0060291	long-term synaptic potentiation	2025-01-11	254/28943	0.0924236	0.10476	0.0325736	Sqstm1	1
GO:0001505	BP	GO:0001505	regulation of neurotransmitter levels	2025-01-11	255/28943	0.0927715	0.105038	0.0326599	Sphk1	1
GO:0090257	BP	GO:0090257	regulation of muscle system process	2025-01-11	258/28943	0.0938148	0.106101	0.0329905	Sphk1	1
GO:1901988	BP	GO:1901988	negative regulation of cell cycle phase transition	2025-01-11	260/28943	0.0945096	0.106769	0.033198	Rb1	1
GO:0048705	BP	GO:0048705	skeletal system morphogenesis	2025-01-11	261/28943	0.0948569	0.107042	0.0332831	Myc	1
GO:0051348	BP	GO:0051348	negative regulation of transferase activity	2025-01-11	262/28943	0.095204	0.107315	0.033368	Rb1	1
GO:0009165	BP	GO:0009165	nucleotide biosynthetic process	2025-01-11	264/28943	0.0958979	0.107978	0.033574	Myc	1
GO:1901215	BP	GO:1901215	negative regulation of neuron death	2025-01-11	267/28943	0.0969379	0.109028	0.0339007	Hif1a	1
GO:0021537	BP	GO:0021537	telencephalon development	2025-01-11	268/28943	0.0972843	0.109177	0.0339469	Hif1a	1
GO:1903522	BP	GO:1903522	regulation of blood circulation	2025-01-11	268/28943	0.0972843	0.109177	0.0339469	Hif1a	1
GO:1901293	BP	GO:1901293	nucleoside phosphate biosynthetic process	2025-01-11	269/28943	0.0976306	0.109445	0.0340302	Myc	1
GO:0051091	BP	GO:0051091	positive regulation of DNA-binding transcription factor activity	2025-01-11	271/28943	0.0983228	0.1101	0.0342339	Sphk1	1
GO:0002274	BP	GO:0002274	myeloid leukocyte activation	2025-01-11	272/28943	0.0986688	0.110366	0.0343166	Sphk1	1
GO:0043543	BP	GO:0043543	protein acylation	2025-01-11	276/28943	0.100051	0.11179	0.0347593	Sphk1	1
GO:0006650	BP	GO:0006650	glycerophospholipid metabolic process	2025-01-11	277/28943	0.100397	0.112053	0.034841	Capn2	1
GO:0071375	BP	GO:0071375	cellular response to peptide hormone stimulus	2025-01-11	278/28943	0.100742	0.112315	0.0349226	Rb1	1
GO:0007605	BP	GO:0007605	sensory perception of sound	2025-01-11	280/28943	0.101432	0.112961	0.0351234	Myc	1
GO:0006605	BP	GO:0006605	protein targeting	2025-01-11	282/28943	0.102121	0.113481	0.035285	Bag3	1
GO:0048863	BP	GO:0048863	stem cell differentiation	2025-01-11	282/28943	0.102121	0.113481	0.035285	Hif1a	1
GO:0003007	BP	GO:0003007	heart morphogenesis	2025-01-11	283/28943	0.102466	0.113616	0.035327	Hif1a	1
GO:0051606	BP	GO:0051606	detection of stimulus	2025-01-11	283/28943	0.102466	0.113616	0.035327	Myc	1
GO:0001894	BP	GO:0001894	tissue homeostasis	2025-01-11	286/28943	0.103499	0.114636	0.0356444	Rb1	1
GO:0043523	BP	GO:0043523	regulation of neuron apoptotic process	2025-01-11	290/28943	0.104875	0.115908	0.0360399	Hif1a	1
GO:0046942	BP	GO:0046942	carboxylic acid transport	2025-01-11	290/28943	0.104875	0.115908	0.0360399	Myc	1
GO:0030072	BP	GO:0030072	peptide hormone secretion	2025-01-11	291/28943	0.105219	0.116162	0.0361188	Hif1a	1
GO:0015850	BP	GO:0015850	organic hydroxy compound transport	2025-01-11	294/28943	0.106249	0.117046	0.0363936	Myc	1
GO:0042593	BP	GO:0042593	glucose homeostasis	2025-01-11	294/28943	0.106249	0.117046	0.0363936	Hif1a	1
GO:0033500	BP	GO:0033500	carbohydrate homeostasis	2025-01-11	295/28943	0.106592	0.117297	0.0364717	Hif1a	1
GO:0046394	BP	GO:0046394	carboxylic acid biosynthetic process	2025-01-11	298/28943	0.107621	0.118301	0.036784	Sphk1	1
GO:0002790	BP	GO:0002790	peptide secretion	2025-01-11	299/28943	0.107963	0.118423	0.0368217	Hif1a	1
GO:0016053	BP	GO:0016053	organic acid biosynthetic process	2025-01-11	299/28943	0.107963	0.118423	0.0368217	Sphk1	1
GO:0010948	BP	GO:0010948	negative regulation of cell cycle process	2025-01-11	302/28943	0.108991	0.119421	0.0371321	Rb1	1
GO:0050708	BP	GO:0050708	regulation of protein secretion	2025-01-11	305/28943	0.110017	0.120416	0.0374415	Hif1a	1
GO:0098813	BP	GO:0098813	nuclear chromosome segregation	2025-01-11	306/28943	0.110359	0.12066	0.0375175	Rb1	1
GO:0046883	BP	GO:0046883	regulation of hormone secretion	2025-01-11	308/28943	0.111042	0.121148	0.037669	Hif1a	1
GO:0072659	BP	GO:0072659	protein localization to plasma membrane	2025-01-11	308/28943	0.111042	0.121148	0.037669	Sqstm1	1
GO:0019932	BP	GO:0019932	second-messenger-mediated signaling	2025-01-11	309/28943	0.111384	0.12139	0.0377444	Sphk1	1
GO:0050954	BP	GO:0050954	sensory perception of mechanical stimulus	2025-01-11	310/28943	0.111725	0.121632	0.0378196	Myc	1
GO:0031647	BP	GO:0031647	regulation of protein stability	2025-01-11	312/28943	0.112407	0.122244	0.03801	Bag3	1
GO:2001020	BP	GO:2001020	regulation of response to DNA damage stimulus	2025-01-11	313/28943	0.112748	0.122485	0.0380847	Myc	1
GO:0006936	BP	GO:0006936	muscle contraction	2025-01-11	317/28943	0.114111	0.123833	0.038504	Sphk1	1
GO:0090287	BP	GO:0090287	regulation of cellular response to growth factor stimulus	2025-01-11	318/28943	0.114452	0.12407	0.0385778	Hif1a	1
GO:0015833	BP	GO:0015833	peptide transport	2025-01-11	320/28943	0.115132	0.124675	0.0387659	Hif1a	1
GO:0007611	BP	GO:0007611	learning or memory	2025-01-11	321/28943	0.115472	0.124749	0.0387887	Hif1a	1
GO:0009416	BP	GO:0009416	response to light stimulus	2025-01-11	322/28943	0.115812	0.124749	0.0387887	Hif1a	1
GO:0015849	BP	GO:0015849	organic acid transport	2025-01-11	322/28943	0.115812	0.124749	0.0387887	Myc	1
GO:0030198	BP	GO:0030198	extracellular matrix organization	2025-01-11	322/28943	0.115812	0.124749	0.0387887	Rb1	1
GO:1901653	BP	GO:1901653	cellular response to peptide	2025-01-11	322/28943	0.115812	0.124749	0.0387887	Rb1	1
GO:0043062	BP	GO:0043062	extracellular structure organization	2025-01-11	323/28943	0.116152	0.124983	0.0388615	Rb1	1
GO:0045229	BP	GO:0045229	external encapsulating structure organization	2025-01-11	324/28943	0.116492	0.125084	0.038893	Rb1	1
GO:0045927	BP	GO:0045927	positive regulation of growth	2025-01-11	324/28943	0.116492	0.125084	0.038893	Sphk1	1
GO:0010631	BP	GO:0010631	epithelial cell migration	2025-01-11	328/28943	0.117849	0.126276	0.0392635	Hif1a	1
GO:0051054	BP	GO:0051054	positive regulation of DNA metabolic process	2025-01-11	328/28943	0.117849	0.126276	0.0392635	Myc	1
GO:0090132	BP	GO:0090132	epithelium migration	2025-01-11	330/28943	0.118527	0.126869	0.039448	Hif1a	1
GO:0090130	BP	GO:0090130	tissue migration	2025-01-11	332/28943	0.119205	0.127461	0.0396319	Hif1a	1
GO:0001822	BP	GO:0001822	kidney development	2025-01-11	334/28943	0.119882	0.12805	0.0398152	Myc	1
GO:0071214	BP	GO:0071214	cellular response to abiotic stimulus	2025-01-11	336/28943	0.120559	0.128504	0.0399562	Bag3	1
GO:0104004	BP	GO:0104004	cellular response to environmental stimulus	2025-01-11	336/28943	0.120559	0.128504	0.0399562	Bag3	1
GO:0043414	BP	GO:0043414	macromolecule methylation	2025-01-11	338/28943	0.121235	0.129089	0.0401383	Myc	1
GO:0032386	BP	GO:0032386	regulation of intracellular transport	2025-01-11	339/28943	0.121573	0.129314	0.0402082	Bag3	1
GO:0051235	BP	GO:0051235	maintenance of location	2025-01-11	341/28943	0.122248	0.129897	0.0403894	Zfyve1	1
GO:1901990	BP	GO:1901990	regulation of mitotic cell cycle phase transition	2025-01-11	342/28943	0.122586	0.13012	0.0404588	Rb1	1
GO:0046651	BP	GO:0046651	lymphocyte proliferation	2025-01-11	344/28943	0.123261	0.1307	0.0406392	Myc	1
GO:0001933	BP	GO:0001933	negative regulation of protein phosphorylation	2025-01-11	346/28943	0.123935	0.131279	0.040819	Rb1	1
GO:0009615	BP	GO:0009615	response to virus	2025-01-11	347/28943	0.124272	0.131362	0.0408451	Hif1a	1
GO:0071900	BP	GO:0071900	regulation of protein serine/threonine kinase activity	2025-01-11	347/28943	0.124272	0.131362	0.0408451	Rb1	1
GO:0072001	BP	GO:0072001	renal system development	2025-01-11	348/28943	0.124609	0.131582	0.0409133	Myc	1
GO:0070371	BP	GO:0070371	ERK1 and ERK2 cascade	2025-01-11	350/28943	0.125282	0.132156	0.0410919	Myc	1
GO:0032943	BP	GO:0032943	mononuclear cell proliferation	2025-01-11	351/28943	0.125619	0.132374	0.0411596	Myc	1
GO:0042886	BP	GO:0042886	amide transport	2025-01-11	353/28943	0.126292	0.132945	0.0413373	Hif1a	1
GO:0009100	BP	GO:0009100	glycoprotein metabolic process	2025-01-11	355/28943	0.126964	0.133515	0.0415144	Hif1a	1
GO:0015711	BP	GO:0015711	organic anion transport	2025-01-11	356/28943	0.1273	0.13373	0.0415813	Myc	1
GO:0050890	BP	GO:0050890	cognition	2025-01-11	358/28943	0.127971	0.134297	0.0417576	Hif1a	1
GO:0006066	BP	GO:0006066	alcohol metabolic process	2025-01-11	359/28943	0.128307	0.134511	0.0418241	Sphk1	1
GO:0006644	BP	GO:0006644	phospholipid metabolic process	2025-01-11	367/28943	0.130987	0.13718	0.0426539	Capn2	1
GO:0007059	BP	GO:0007059	chromosome segregation	2025-01-11	369/28943	0.131656	0.137597	0.0427838	Rb1	1
GO:0043434	BP	GO:0043434	response to peptide hormone	2025-01-11	369/28943	0.131656	0.137597	0.0427838	Rb1	1
GO:0046879	BP	GO:0046879	hormone secretion	2025-01-11	375/28943	0.13366	0.139549	0.0433905	Hif1a	1
GO:0043010	BP	GO:0043010	camera-type eye development	2025-01-11	376/28943	0.133994	0.139754	0.0434542	Hif1a	1
GO:1990778	BP	GO:1990778	protein localization to cell periphery	2025-01-11	377/28943	0.134327	0.139958	0.0435178	Sqstm1	1
GO:0048167	BP	GO:0048167	regulation of synaptic plasticity	2025-01-11	378/28943	0.13466	0.140162	0.0435813	Sqstm1	1
GO:0140694	BP	GO:0140694	non-membrane-bounded organelle assembly	2025-01-11	379/28943	0.134994	0.140366	0.0436445	Zfyve1	1
GO:0042060	BP	GO:0042060	wound healing	2025-01-11	380/28943	0.135327	0.140569	0.0437076	Hif1a	1
GO:0050878	BP	GO:0050878	regulation of body fluid levels	2025-01-11	381/28943	0.13566	0.140771	0.0437706	Hif1a	1
GO:0032259	BP	GO:0032259	methylation	2025-01-11	382/28943	0.135993	0.14083	0.0437888	Myc	1
GO:0046486	BP	GO:0046486	glycerolipid metabolic process	2025-01-11	382/28943	0.135993	0.14083	0.0437888	Capn2	1
GO:0009914	BP	GO:0009914	hormone transport	2025-01-11	383/28943	0.136325	0.141031	0.0438514	Hif1a	1
GO:0070661	BP	GO:0070661	leukocyte proliferation	2025-01-11	384/28943	0.136658	0.141232	0.0439138	Myc	1
GO:0045786	BP	GO:0045786	negative regulation of cell cycle	2025-01-11	385/28943	0.136991	0.141432	0.0439761	Rb1	1
GO:1902903	BP	GO:1902903	regulation of supramolecular fiber organization	2025-01-11	389/28943	0.138319	0.142659	0.0443577	Rb1	1
GO:0006909	BP	GO:0006909	phagocytosis	2025-01-11	390/28943	0.138651	0.142857	0.0444192	Sphk1	1
GO:0001655	BP	GO:0001655	urogenital system development	2025-01-11	391/28943	0.138983	0.143054	0.0444806	Myc	1
GO:0042326	BP	GO:0042326	negative regulation of phosphorylation	2025-01-11	394/28943	0.139978	0.143933	0.0447537	Rb1	1
GO:0009306	BP	GO:0009306	protein secretion	2025-01-11	404/28943	0.143287	0.147186	0.0457653	Hif1a	1
GO:0035592	BP	GO:0035592	establishment of protein localization to extracellular region	2025-01-11	405/28943	0.143617	0.147377	0.0458246	Hif1a	1
GO:0030900	BP	GO:0030900	forebrain development	2025-01-11	407/28943	0.144277	0.147757	0.0459427	Hif1a	1
GO:0032102	BP	GO:0032102	negative regulation of response to external stimulus	2025-01-11	407/28943	0.144277	0.147757	0.0459427	Rb1	1
GO:0071692	BP	GO:0071692	protein localization to extracellular region	2025-01-11	411/28943	0.145596	0.148958	0.0463161	Hif1a	1
GO:0001654	BP	GO:0001654	eye development	2025-01-11	424/28943	0.149869	0.153176	0.0476276	Hif1a	1
GO:0001503	BP	GO:0001503	ossification	2025-01-11	426/28943	0.150524	0.153692	0.0477881	Hif1a	1
GO:0150063	BP	GO:0150063	visual system development	2025-01-11	427/28943	0.150852	0.153872	0.0478442	Hif1a	1
GO:1901652	BP	GO:1901652	response to peptide	2025-01-11	430/28943	0.151834	0.154719	0.0481076	Rb1	1
GO:0048880	BP	GO:0048880	sensory system development	2025-01-11	431/28943	0.152162	0.154898	0.0481631	Hif1a	1
GO:0003012	BP	GO:0003012	muscle system process	2025-01-11	432/28943	0.152489	0.155076	0.0482184	Sphk1	1
GO:0007018	BP	GO:0007018	microtubule-based movement	2025-01-11	434/28943	0.153143	0.155431	0.0483287	Hif1a	1
GO:1901987	BP	GO:1901987	regulation of cell cycle phase transition	2025-01-11	434/28943	0.153143	0.155431	0.0483287	Rb1	1
GO:0031346	BP	GO:0031346	positive regulation of cell projection organization	2025-01-11	441/28943	0.155428	0.157593	0.049001	Sphk1	1
GO:0016055	BP	GO:0016055	Wnt signaling pathway	2025-01-11	451/28943	0.158682	0.160592	0.0499336	Myc	1
GO:0006631	BP	GO:0006631	fatty acid metabolic process	2025-01-11	453/28943	0.159331	0.160592	0.0499336	Sphk1	1
GO:0010563	BP	GO:0010563	negative regulation of phosphorus metabolic process	2025-01-11	453/28943	0.159331	0.160592	0.0499336	Rb1	1
GO:0034248	BP	GO:0034248	regulation of cellular amide metabolic process	2025-01-11	453/28943	0.159331	0.160592	0.0499336	Sphk1	1
GO:0045936	BP	GO:0045936	negative regulation of phosphate metabolic process	2025-01-11	453/28943	0.159331	0.160592	0.0499336	Rb1	1
GO:0198738	BP	GO:0198738	cell-cell signaling by wnt	2025-01-11	453/28943	0.159331	0.160592	0.0499336	Myc	1
GO:0051656	BP	GO:0051656	establishment of organelle localization	2025-01-11	455/28943	0.15998	0.161087	0.0500875	Hif1a	1
GO:0002683	BP	GO:0002683	negative regulation of immune system process	2025-01-11	465/28943	0.163219	0.164186	0.051051	Myc	1
GO:0042391	BP	GO:0042391	regulation of membrane potential	2025-01-11	469/28943	0.164511	0.165322	0.0514044	Myc	1
GO:0010876	BP	GO:0010876	lipid localization	2025-01-11	470/28943	0.164834	0.165483	0.0514545	Zfyve1	1
GO:0001667	BP	GO:0001667	ameboidal-type cell migration	2025-01-11	471/28943	0.165156	0.165644	0.0515045	Hif1a	1
GO:0048732	BP	GO:0048732	gland development	2025-01-11	483/28943	0.169019	0.169352	0.0526573	Hif1a	1
GO:0007389	BP	GO:0007389	pattern specification process	2025-01-11	493/28943	0.172226	0.172395	0.0536036	Hif1a	1
GO:0006820	BP	GO:0006820	anion transport	2025-01-11	500/28943	0.174464	0.174464	0.0542469	Myc	1
GO:0005776	CC	GO:0005776	autophagosome	2025-03-11	89/28804	4.62143e-06	0.00035585	0.000150805	Zfyve1/Sqstm1/Gabarapl1	3
GO:0101031	CC	GO:0101031	chaperone complex	2025-02-11	34/28804	7.38873e-05	0.00177004	0.000750121	Bag3/Hspb8	2
GO:0000407	CC	GO:0000407	phagophore assembly site	2025-02-11	35/28804	7.8349e-05	0.00177004	0.000750121	Zfyve1/Sqstm1	2
GO:0090575	CC	GO:0090575	RNA polymerase II transcription regulator complex	2025-03-11	242/28804	9.19503e-05	0.00177004	0.000750121	Myc/Hif1a/Rb1	3
GO:0000791	CC	GO:0000791	euchromatin	2025-02-11	68/28804	0.000297909	0.0045878	0.00194425	Myc/Hif1a	2
GO:0016605	CC	GO:0016605	PML body	2025-02-11	76/28804	0.000372093	0.00477519	0.00202366	Rb1/Sqstm1	2
GO:0031514	CC	GO:0031514	motile cilium	2025-02-11	269/28804	0.00452066	0.0335191	0.0142049	Hif1a/Sqstm1	2
GO:0031143	CC	GO:0031143	pseudopodium	2025-01-11	12/28804	0.00457396	0.0335191	0.0142049	Capn2	1
GO:0005677	CC	GO:0005677	chromatin silencing complex	2025-01-11	13/28804	0.00495426	0.0335191	0.0142049	Rb1	1
GO:0019908	CC	GO:0019908	nuclear cyclin-dependent protein kinase holoenzyme complex	2025-01-11	13/28804	0.00495426	0.0335191	0.0142049	Rb1	1
GO:0044753	CC	GO:0044753	amphisome	2025-01-11	13/28804	0.00495426	0.0335191	0.0142049	Sqstm1	1
GO:0044754	CC	GO:0044754	autolysosome	2025-01-11	14/28804	0.00533443	0.0335191	0.0142049	Sqstm1	1
GO:0008303	CC	GO:0008303	caspase complex	2025-01-11	15/28804	0.00571447	0.0335191	0.0142049	Capn2	1
GO:0090571	CC	GO:0090571	RNA polymerase II transcription repressor complex	2025-01-11	16/28804	0.00609438	0.0335191	0.0142049	Myc	1
GO:0005767	CC	GO:0005767	secondary lysosome	2025-01-11	18/28804	0.00685379	0.0341877	0.0144883	Sqstm1	1
GO:0044233	CC	GO:0044233	mitochondria-associated endoplasmic reticulum membrane	2025-01-11	20/28804	0.00761268	0.0341877	0.0144883	Zfyve1	1
GO:0005819	CC	GO:0005819	spindle	2025-02-11	360/28804	0.00795205	0.0341877	0.0144883	Myc/Rb1	2
GO:0032806	CC	GO:0032806	carboxy-terminal domain protein kinase complex	2025-01-11	21/28804	0.00799193	0.0341877	0.0144883	Rb1	1
GO:0097038	CC	GO:0097038	perinuclear endoplasmic reticulum	2025-01-11	26/28804	0.00988619	0.0400651	0.0169791	Capn2	1
GO:0032839	CC	GO:0032839	dendrite cytoplasm	2025-01-11	28/28804	0.010643	0.0409755	0.0173649	Gabarapl1	1
GO:0000421	CC	GO:0000421	autophagosome membrane	2025-01-11	36/28804	0.0136649	0.0501045	0.0212336	Gabarapl1	1
GO:0016235	CC	GO:0016235	aggresome	2025-01-11	38/28804	0.014419	0.0504665	0.0213871	Sqstm1	1
GO:0044232	CC	GO:0044232	organelle membrane contact site	2025-01-11	42/28804	0.0159258	0.0510951	0.0216534	Zfyve1	1
GO:0120111	CC	GO:0120111	neuron projection cytoplasm	2025-01-11	42/28804	0.0159258	0.0510951	0.0216534	Gabarapl1	1
GO:0032590	CC	GO:0032590	dendrite membrane	2025-01-11	50/28804	0.018933	0.0561919	0.0238134	Gabarapl1	1
GO:0000307	CC	GO:0000307	cyclin-dependent protein kinase holoenzyme complex	2025-01-11	51/28804	0.0193083	0.0561919	0.0238134	Rb1	1
GO:0008023	CC	GO:0008023	transcription elongation factor complex	2025-01-11	53/28804	0.0200585	0.0561919	0.0238134	Rb1	1
GO:0097225	CC	GO:0097225	sperm midpiece	2025-01-11	54/28804	0.0204334	0.0561919	0.0238134	Sqstm1	1
GO:0031312	CC	GO:0031312	extrinsic component of organelle membrane	2025-01-11	61/28804	0.0230542	0.0612129	0.0259412	Zfyve1	1
GO:0005905	CC	GO:0005905	clathrin-coated pit	2025-01-11	70/28804	0.0264145	0.0665359	0.028197	Sphk1	1
GO:0032589	CC	GO:0032589	neuron projection membrane	2025-01-11	71/28804	0.0267872	0.0665359	0.028197	Gabarapl1	1
GO:0017053	CC	GO:0017053	transcription repressor complex	2025-01-11	76/28804	0.0286488	0.0688909	0.029195	Myc	1
GO:0016234	CC	GO:0016234	inclusion body	2025-01-11	80/28804	0.0301357	0.0688909	0.029195	Sqstm1	1
GO:0000932	CC	GO:0000932	P-body	2025-01-11	86/28804	0.0323623	0.0688909	0.029195	Sqstm1	1
GO:0005795	CC	GO:0005795	Golgi stack	2025-01-11	86/28804	0.0323623	0.0688909	0.029195	Zfyve1	1
GO:0001725	CC	GO:0001725	stress fiber	2025-01-11	88/28804	0.0331034	0.0688909	0.029195	Bag3	1
GO:0097517	CC	GO:0097517	contractile actin filament bundle	2025-01-11	88/28804	0.0331034	0.0688909	0.029195	Bag3	1
GO:0005758	CC	GO:0005758	mitochondrial intermembrane space	2025-01-11	92/28804	0.0345842	0.0700784	0.0296983	Capn2	1
GO:0032432	CC	GO:0032432	actin filament bundle	2025-01-11	97/28804	0.0364322	0.070132	0.029721	Bag3	1
GO:0042641	CC	GO:0042641	actomyosin	2025-01-11	97/28804	0.0364322	0.070132	0.029721	Bag3	1
GO:1905369	CC	GO:1905369	endopeptidase complex	2025-01-11	100/28804	0.0375395	0.070501	0.0298774	Capn2	1
GO:0031970	CC	GO:0031970	organelle envelope lumen	2025-01-11	105/28804	0.0393824	0.0711813	0.0301657	Capn2	1
GO:0031901	CC	GO:0031901	early endosome membrane	2025-01-11	106/28804	0.0397506	0.0711813	0.0301657	Sphk1	1
GO:0005811	CC	GO:0005811	lipid droplet	2025-01-11	109/28804	0.0408544	0.0714952	0.0302987	Zfyve1	1
GO:1902554	CC	GO:1902554	serine/threonine protein kinase complex	2025-01-11	123/28804	0.0459903	0.0786945	0.0333497	Rb1	1
GO:0030018	CC	GO:0030018	Z disc	2025-01-11	131/28804	0.0489138	0.0813905	0.0344922	Bag3	1
GO:1902911	CC	GO:1902911	protein kinase complex	2025-01-11	136/28804	0.0507369	0.0813905	0.0344922	Rb1	1
GO:1905368	CC	GO:1905368	peptidase complex	2025-01-11	136/28804	0.0507369	0.0813905	0.0344922	Capn2	1
GO:0031674	CC	GO:0031674	I band	2025-01-11	144/28804	0.0536472	0.0843028	0.0357264	Bag3	1
GO:0031256	CC	GO:0031256	leading edge membrane	2025-01-11	156/28804	0.0579975	0.0893162	0.037851	Gabarapl1	1
GO:0005925	CC	GO:0005925	focal adhesion	2025-01-11	172/28804	0.0637696	0.0962796	0.040802	Capn2	1
GO:0036126	CC	GO:0036126	sperm flagellum	2025-01-11	176/28804	0.0652076	0.0965574	0.0409198	Sqstm1	1
GO:0032838	CC	GO:0032838	plasma membrane bounded cell projection cytoplasm	2025-01-11	184/28804	0.0680776	0.0975843	0.0413549	Gabarapl1	1
GO:0030055	CC	GO:0030055	cell-substrate junction	2025-01-11	185/28804	0.0684357	0.0975843	0.0413549	Capn2	1
GO:0097729	CC	GO:0097729	9+2 motile cilium	2025-01-11	192/28804	0.0709395	0.0993153	0.0420885	Sqstm1	1
GO:0030017	CC	GO:0030017	sarcomere	2025-01-11	198/28804	0.0730807	0.100486	0.0425846	Bag3	1
GO:0030139	CC	GO:0030139	endocytic vesicle	2025-01-11	211/28804	0.0777046	0.104969	0.0444847	Sphk1	1
GO:0030016	CC	GO:0030016	myofibril	2025-01-11	223/28804	0.0819543	0.107474	0.0455463	Bag3	1
GO:0099568	CC	GO:0099568	cytoplasmic region	2025-01-11	229/28804	0.0840724	0.107474	0.0455463	Gabarapl1	1
GO:0008021	CC	GO:0008021	synaptic vesicle	2025-01-11	234/28804	0.0858341	0.107474	0.0455463	Sphk1	1
GO:0036464	CC	GO:0036464	cytoplasmic ribonucleoprotein granule	2025-01-11	235/28804	0.0861861	0.107474	0.0455463	Sqstm1	1
GO:0043292	CC	GO:0043292	contractile fiber	2025-01-11	236/28804	0.0865379	0.107474	0.0455463	Bag3	1
GO:0005774	CC	GO:0005774	vacuolar membrane	2025-01-11	252/28804	0.0921508	0.111233	0.0471392	Gabarapl1	1
GO:0035770	CC	GO:0035770	ribonucleoprotein granule	2025-01-11	253/28804	0.0925005	0.111233	0.0471392	Sqstm1	1
GO:0070382	CC	GO:0070382	exocytic vesicle	2025-01-11	257/28804	0.0938983	0.111233	0.0471392	Sphk1	1
GO:0061695	CC	GO:0061695	transferase complex, transferring phosphorus-containing groups	2025-01-11	281/28804	0.102244	0.119285	0.0505514	Rb1	1
GO:0010008	CC	GO:0010008	endosome membrane	2025-01-11	291/28804	0.105701	0.121477	0.0514804	Sphk1	1
GO:0098791	CC	GO:0098791	Golgi apparatus subcompartment	2025-01-11	311/28804	0.112578	0.127478	0.0540236	Zfyve1	1
GO:0031253	CC	GO:0031253	cell projection membrane	2025-01-11	320/28804	0.115657	0.129067	0.0546968	Gabarapl1	1
GO:0019898	CC	GO:0019898	extrinsic component of membrane	2025-01-11	337/28804	0.121447	0.132747	0.0562563	Zfyve1	1
GO:0030133	CC	GO:0030133	transport vesicle	2025-01-11	346/28804	0.124498	0.132747	0.0562563	Sphk1	1
GO:0005769	CC	GO:0005769	early endosome	2025-01-11	348/28804	0.125175	0.132747	0.0562563	Sphk1	1
GO:0016607	CC	GO:0016607	nuclear speck	2025-01-11	350/28804	0.125851	0.132747	0.0562563	Hif1a	1
GO:0045121	CC	GO:0045121	membrane raft	2025-01-11	394/28804	0.140608	0.144699	0.0613216	Capn2	1
GO:0098857	CC	GO:0098857	membrane microdomain	2025-01-11	395/28804	0.140941	0.144699	0.0613216	Capn2	1
GO:0031252	CC	GO:0031252	cell leading edge	2025-01-11	409/28804	0.145587	0.147503	0.0625097	Gabarapl1	1
GO:0005874	CC	GO:0005874	microtubule	2025-01-11	441/28804	0.156121	0.156121	0.0661621	Gabarapl1	1
GO:0031625	MF	GO:0031625	ubiquitin protein ligase binding	2025-05-11	315/28404	7.10884e-08	2.72371e-06	1.11767e-06	Myc/Hif1a/Rb1/Sqstm1/Gabarapl1	5
GO:0044389	MF	GO:0044389	ubiquitin-like protein ligase binding	2025-05-11	332/28404	9.23291e-08	2.72371e-06	1.11767e-06	Myc/Hif1a/Rb1/Sqstm1/Gabarapl1	5
GO:0070888	MF	GO:0070888	E-box binding	2025-02-11	46/28404	0.000139814	0.00274968	0.00112833	Myc/Hif1a	2
GO:0061629	MF	GO:0061629	RNA polymerase II-specific DNA-binding transcription factor binding	2025-03-11	376/28404	0.000350887	0.00517558	0.00212379	Hif1a/Rb1/Gabarapl1	3
GO:0001221	MF	GO:0001221	transcription coregulator binding	2025-02-11	133/28404	0.00116419	0.0137375	0.00563714	Myc/Hif1a	2
GO:0000774	MF	GO:0000774	adenyl-nucleotide exchange factor activity	2025-01-11	11/28404	0.00425247	0.0322782	0.0132453	Bag3	1
GO:0060590	MF	GO:0060590	ATPase regulator activity	2025-01-11	12/28404	0.00463824	0.0322782	0.0132453	Bag3	1
GO:0004198	MF	GO:0004198	calcium-dependent cysteine-type endopeptidase activity	2025-01-11	14/28404	0.00540938	0.0322782	0.0132453	Capn2	1
GO:0005545	MF	GO:0005545	1-phosphatidylinositol binding	2025-01-11	14/28404	0.00540938	0.0322782	0.0132453	Zfyve1	1
GO:0003951	MF	GO:0003951	NAD+ kinase activity	2025-01-11	15/28404	0.00579474	0.0322782	0.0132453	Sphk1	1
GO:0045125	MF	GO:0045125	bioactive lipid receptor activity	2025-01-11	16/28404	0.00617997	0.0322782	0.0132453	Sphk1	1
GO:0050811	MF	GO:0050811	GABA receptor binding	2025-01-11	17/28404	0.00656507	0.0322782	0.0132453	Gabarapl1	1
GO:0070530	MF	GO:0070530	K63-linked polyubiquitin modification-dependent protein binding	2025-01-11	24/28404	0.00925692	0.0406296	0.0166723	Sqstm1	1
GO:0043495	MF	GO:0043495	protein-membrane adaptor activity	2025-01-11	25/28404	0.00964093	0.0406296	0.0166723	Gabarapl1	1
GO:0043325	MF	GO:0043325	phosphatidylinositol-3,4-bisphosphate binding	2025-01-11	29/28404	0.0111756	0.0439574	0.0180378	Zfyve1	1
GO:0005164	MF	GO:0005164	tumor necrosis factor receptor binding	2025-01-11	33/28404	0.0127081	0.0444265	0.0182303	Tnfsf10	1
GO:0097718	MF	GO:0097718	disordered domain specific binding	2025-01-11	37/28404	0.0142385	0.0444265	0.0182303	Rb1	1
GO:0051721	MF	GO:0051721	protein phosphatase 2A binding	2025-01-11	38/28404	0.0146207	0.0444265	0.0182303	Sphk1	1
GO:0035255	MF	GO:0035255	ionotropic glutamate receptor binding	2025-01-11	39/28404	0.0150029	0.0444265	0.0182303	Sqstm1	1
GO:0005547	MF	GO:0005547	phosphatidylinositol-3,4,5-trisphosphate binding	2025-01-11	44/28404	0.0169114	0.0444265	0.0182303	Zfyve1	1
GO:0032266	MF	GO:0032266	phosphatidylinositol-3-phosphate binding	2025-01-11	46/28404	0.0176739	0.0444265	0.0182303	Zfyve1	1
GO:0042169	MF	GO:0042169	SH2 domain binding	2025-01-11	46/28404	0.0176739	0.0444265	0.0182303	Sqstm1	1
GO:0001223	MF	GO:0001223	transcription coactivator binding	2025-01-11	48/28404	0.0184359	0.0444265	0.0182303	Hif1a	1
GO:0032813	MF	GO:0032813	tumor necrosis factor receptor superfamily binding	2025-01-11	48/28404	0.0184359	0.0444265	0.0182303	Tnfsf10	1
GO:0051879	MF	GO:0051879	Hsp90 protein binding	2025-01-11	50/28404	0.0191973	0.0444265	0.0182303	Hif1a	1
GO:0001046	MF	GO:0001046	core promoter sequence-specific DNA binding	2025-01-11	51/28404	0.0195778	0.0444265	0.0182303	Myc	1
GO:0031593	MF	GO:0031593	polyubiquitin modification-dependent protein binding	2025-01-11	57/28404	0.021858	0.0477638	0.0195998	Sqstm1	1
GO:0005080	MF	GO:0005080	protein kinase C binding	2025-01-11	64/28404	0.0245122	0.0516506	0.0211947	Sqstm1	1
GO:0035254	MF	GO:0035254	glutamate receptor binding	2025-01-11	68/28404	0.0260259	0.0529492	0.0217276	Sqstm1	1
GO:0002039	MF	GO:0002039	p53 binding	2025-01-11	76/28404	0.0290469	0.0571256	0.0234414	Hif1a	1
GO:0043130	MF	GO:0043130	ubiquitin binding	2025-01-11	89/28404	0.0339379	0.0645915	0.026505	Sqstm1	1
GO:0016407	MF	GO:0016407	acetyltransferase activity	2025-01-11	98/28404	0.0373109	0.0687919	0.0282286	Sphk1	1
GO:0004197	MF	GO:0004197	cysteine-type endopeptidase activity	2025-01-11	105/28404	0.0399269	0.0691021	0.0283559	Capn2	1
GO:0051087	MF	GO:0051087	chaperone binding	2025-01-11	109/28404	0.0414188	0.0691021	0.0283559	Bag3	1
GO:0032182	MF	GO:0032182	ubiquitin-like protein binding	2025-01-11	111/28404	0.042164	0.0691021	0.0283559	Sqstm1	1
GO:0051219	MF	GO:0051219	phosphoprotein binding	2025-01-11	111/28404	0.042164	0.0691021	0.0283559	Rb1	1
GO:0042826	MF	GO:0042826	histone deacetylase binding	2025-01-11	134/28404	0.0506959	0.0808394	0.0331723	Hif1a	1
GO:0031072	MF	GO:0031072	heat shock protein binding	2025-01-11	143/28404	0.0540156	0.0838663	0.0344144	Hif1a	1
GO:0016922	MF	GO:0016922	nuclear receptor binding	2025-01-11	155/28404	0.0584255	0.0883872	0.0362695	Hif1a	1
GO:0008234	MF	GO:0008234	cysteine-type peptidase activity	2025-01-11	176/28404	0.0660978	0.0974942	0.0400066	Capn2	1
GO:0019903	MF	GO:0019903	protein phosphatase binding	2025-01-11	185/28404	0.0693685	0.0981639	0.0402813	Sphk1	1
GO:1901981	MF	GO:1901981	phosphatidylinositol phosphate binding	2025-01-11	187/28404	0.0700939	0.0981639	0.0402813	Zfyve1	1
GO:0005516	MF	GO:0005516	calmodulin binding	2025-01-11	191/28404	0.0715432	0.0981639	0.0402813	Sphk1	1
GO:0000287	MF	GO:0000287	magnesium ion binding	2025-01-11	213/28404	0.0794775	0.104204	0.0427598	Sphk1	1
GO:0140030	MF	GO:0140030	modification-dependent protein binding	2025-01-11	213/28404	0.0794775	0.104204	0.0427598	Sqstm1	1
GO:0016747	MF	GO:0016747	acyltransferase activity, transferring groups other than amino-acyl groups	2025-01-11	225/28404	0.0837793	0.106516	0.0437087	Sphk1	1
GO:0005125	MF	GO:0005125	cytokine activity	2025-01-11	228/28404	0.0848519	0.106516	0.0437087	Tnfsf10	1
GO:0019902	MF	GO:0019902	phosphatase binding	2025-01-11	234/28404	0.0869937	0.10693	0.0438784	Sphk1	1
GO:0016746	MF	GO:0016746	acyltransferase activity	2025-01-11	254/28404	0.0941	0.113304	0.0464941	Sphk1	1
GO:0035091	MF	GO:0035091	phosphatidylinositol binding	2025-01-11	272/28404	0.100453	0.118534	0.0486402	Zfyve1	1
GO:0046982	MF	GO:0046982	protein heterodimerization activity	2025-01-11	307/28404	0.112689	0.130366	0.0534954	Hif1a	1
GO:0005126	MF	GO:0005126	cytokine receptor binding	2025-01-11	315/28404	0.115465	0.131008	0.053759	Tnfsf10	1
GO:0001227	MF	GO:0001227	DNA-binding transcription repressor activity, RNA polymerase II-specific	2025-01-11	331/28404	0.120992	0.131638	0.0540173	Myc	1
GO:0001217	MF	GO:0001217	DNA-binding transcription repressor activity	2025-01-11	334/28404	0.122025	0.131638	0.0540173	Myc	1
GO:0030674	MF	GO:0030674	protein-macromolecule adaptor activity	2025-01-11	336/28404	0.122713	0.131638	0.0540173	Gabarapl1	1
GO:0060090	MF	GO:0060090	molecular adaptor activity	2025-01-11	433/28404	0.155499	0.163829	0.0672268	Gabarapl1	1
GO:0004175	MF	GO:0004175	endopeptidase activity	2025-01-11	453/28404	0.162118	0.167259	0.0686344	Capn2	1
GO:0005543	MF	GO:0005543	phospholipid binding	2025-01-11	460/28404	0.164424	0.167259	0.0686344	Zfyve1	1
GO:0003712	MF	GO:0003712	transcription coregulator activity	2025-01-11	490/28404	0.174241	0.174241	0.0714993	Sqstm1	1

## Sheet: KEGG
	ID	Description	GeneRatio	BgRatio	pvalue	p.adjust	qvalue	geneID	Count
mmu04140	mmu04140	Autophagy - animal	2025-04-09	167/9573	1.05E-05	0.000581674	0.000389638	Hif1a,Zfyve1,Sqstm1,Gabarapl1	4
mmu04218	mmu04218	Cellular senescence	2025-04-09	183/9573	1.51E-05	0.000581674	0.000389638	Myc,Rb1,Sqstm1,Capn2	4
mmu04137	mmu04137	Mitophagy - animal	2025-03-09	101/9573	9.14E-05	0.00234709	0.00157221	Hif1a,Sqstm1,Gabarapl1	3
mmu04217	mmu04217	Necroptosis	2025-03-09	177/9573	0.000480943	0.00925815	0.00620163	Tnfsf10,Sqstm1,Capn2	3
mmu05219	mmu05219	Bladder cancer	2025-02-09	41/9573	0.000632168	0.00973539	0.00652131	Myc,Rb1	2
mmu05167	mmu05167	Kaposi sarcoma-associated herpesvirus infection	2025-03-09	223/9573	0.000944338	0.012119	0.00811799	Myc,Hif1a,Rb1	3
mmu05230	mmu05230	Central carbon metabolism in cancer	2025-02-09	69/9573	0.00178407	0.0196247	0.0131457	Myc,Hif1a	2
mmu05220	mmu05220	Chronic myeloid leukemia	2025-02-09	76/9573	0.00215995	0.0207895	0.013926	Myc,Rb1	2
mmu05222	mmu05222	Small cell lung cancer	2025-02-09	94/9573	0.00328368	0.0280937	0.0188188	Myc,Rb1	2
mmu04919	mmu04919	Thyroid hormone signaling pathway	2025-02-09	120/9573	0.00529617	0.040721	0.0272772	Myc,Hif1a	2
mmu04068	mmu04068	FoxO signaling pathway	2025-02-09	133/9573	0.00646994	0.040721	0.0272772	Tnfsf10,Gabarapl1	2
mmu04210	mmu04210	Apoptosis	2025-02-09	135/9573	0.00666023	0.040721	0.0272772	Tnfsf10,Capn2	2
mmu05224	mmu05224	Breast cancer	2025-02-09	147/9573	0.00785549	0.040721	0.0272772	Myc,Rb1	2
mmu05226	mmu05226	Gastric cancer	2025-02-09	150/9573	0.00816852	0.040721	0.0272772	Myc,Rb1	2
mmu05022	mmu05022	Pathways of neurodegeneration - multiple diseases	2025-03-09	481/9573	0.00843622	0.040721	0.0272772	Zfyve1,Sqstm1,Capn2	3
mmu04110	mmu04110	Cell cycle	2025-02-09	157/9573	0.00892081	0.040721	0.0272772	Myc,Rb1	2
mmu04148	mmu04148	Efferocytosis	2025-02-09	163/9573	0.00958978	0.040721	0.0272772	Sphk1,Hif1a	2
mmu05161	mmu05161	Hepatitis B	2025-02-09	164/9573	0.00970342	0.040721	0.0272772	Myc,Rb1	2
mmu05160	mmu05160	Hepatitis C	2025-02-09	167/9573	0.010048	0.040721	0.0272772	Myc,Rb1	2
mmu05225	mmu05225	Hepatocellular carcinoma	2025-02-09	175/9573	0.0109937	0.0423258	0.0283522	Myc,Rb1	2
mmu05205	mmu05205	Proteoglycans in cancer	2025-02-09	204/9573	0.0147409	0.0540498	0.0362056	Myc,Hif1a	2
mmu05169	mmu05169	Epstein-Barr virus infection	2025-02-09	228/9573	0.0182078	0.0609565	0.0408321	Myc,Rb1	2
mmu05207	mmu05207	Chemical carcinogenesis - receptor activation	2025-02-09	228/9573	0.0182078	0.0609565	0.0408321	Myc,Rb1	2
mmu05166	mmu05166	Human T-cell leukemia virus 1 infection	2025-02-09	247/9573	0.0211782	0.066106	0.0442815	Myc,Rb1	2
mmu05132	mmu05132	Salmonella infection	2025-02-09	252/9573	0.0219922	0.066106	0.0442815	Tnfsf10,Myc	2
mmu05163	mmu05163	Human cytomegalovirus infection	2025-02-09	254/9573	0.0223215	0.066106	0.0442815	Myc,Rb1	2
mmu04136	mmu04136	Autophagy - other	2025-01-09	32/9573	0.0296977	0.0846935	0.0567325	Gabarapl1	1
mmu05216	mmu05216	Thyroid cancer	2025-01-09	37/9573	0.0342665	0.0942328	0.0631224	Myc	1
mmu00600	mmu00600	Sphingolipid metabolism	2025-01-09	55/9573	0.0505561	0.132259	0.0885945	Sphk1	1
mmu04370	mmu04370	VEGF signaling pathway	2025-01-09	58/9573	0.0532471	0.132259	0.0885945	Sphk1	1
mmu05213	mmu05213	Endometrial cancer	2025-01-09	58/9573	0.0532471	0.132259	0.0885945	Myc	1
mmu05211	mmu05211	Renal cell carcinoma	2025-01-09	70/9573	0.0639436	0.144118	0.0965384	Hif1a	1
mmu05221	mmu05221	Acute myeloid leukemia	2025-01-09	70/9573	0.0639436	0.144118	0.0965384	Myc	1
mmu05218	mmu05218	Melanoma	2025-01-09	72/9573	0.0657159	0.144118	0.0965384	Rb1	1
mmu05223	mmu05223	Non-small cell lung cancer	2025-01-09	72/9573	0.0657159	0.144118	0.0965384	Rb1	1
mmu05214	mmu05214	Glioma	2025-01-09	74/9573	0.0674852	0.144118	0.0965384	Rb1	1
mmu05212	mmu05212	Pancreatic cancer	2025-01-09	76/9573	0.0692515	0.144118	0.0965384	Rb1	1
mmu04012	mmu04012	ErbB signaling pathway	2025-01-09	84/9573	0.0762871	0.150297	0.100677	Myc	1
mmu05210	mmu05210	Colorectal cancer	2025-01-09	88/9573	0.0797871	0.150297	0.100677	Myc	1
mmu05235	mmu05235	PD-L1 expression and PD-1 checkpoint pathway in cancer	2025-01-09	88/9573	0.0797871	0.150297	0.100677	Hif1a	1
mmu04727	mmu04727	GABAergic synapse	2025-01-09	90/9573	0.0815327	0.150297	0.100677	Gabarapl1	1
mmu01522	mmu01522	Endocrine resistance	2025-01-09	93/9573	0.0841455	0.150297	0.100677	Rb1	1
mmu04666	mmu04666	Fc gamma R-mediated phagocytosis	2025-01-09	94/9573	0.085015	0.150297	0.100677	Sphk1	1
mmu04061	mmu04061	Viral protein interaction with cytokine and cytokine receptor	2025-01-09	95/9573	0.0858837	0.150297	0.100677	Tnfsf10	1
mmu05231	mmu05231	Choline metabolism in cancer	2025-01-09	98/9573	0.0884856	0.151015	0.101158	Hif1a	1
mmu05215	mmu05215	Prostate cancer	2025-01-09	100/9573	0.0902165	0.151015	0.101158	Rb1	1
mmu04659	mmu04659	Th17 cell differentiation	2025-01-09	105/9573	0.094531	0.15487	0.103741	Hif1a	1
mmu04350	mmu04350	TGF-beta signaling pathway	2025-01-09	110/9573	0.0988273	0.158535	0.106196	Myc	1
mmu04066	mmu04066	HIF-1 signaling pathway	2025-01-09	117/9573	0.104812	0.164704	0.110328	Hif1a	1
mmu04650	mmu04650	Natural killer cell mediated cytotoxicity	2025-01-09	120/9573	0.107366	0.165343	0.110756	Tnfsf10	1
mmu04071	mmu04071	Sphingolipid signaling pathway	2025-01-09	126/9573	0.112454	0.169783	0.11373	Sphk1	1
mmu04380	mmu04380	Osteoclast differentiation	2025-01-09	136/9573	0.120877	0.177138	0.118657	Sqstm1	1
mmu04371	mmu04371	Apelin signaling pathway	2025-01-09	139/9573	0.12339	0.177138	0.118657	Sphk1	1
mmu04550	mmu04550	Signaling pathways regulating pluripotency of stem cells	2025-01-09	140/9573	0.124227	0.177138	0.118657	Myc	1
mmu05418	mmu05418	Fluid shear stress and atherosclerosis	2025-01-09	148/9573	0.130891	0.181117	0.121322	Sqstm1	1
mmu04072	mmu04072	Phospholipase D signaling pathway	2025-01-09	149/9573	0.131721	0.181117	0.121322	Sphk1	1
mmu04390	mmu04390	Hippo signaling pathway	2025-01-09	158/9573	0.139159	0.187987	0.125924	Myc	1
mmu04934	mmu04934	Cushing syndrome	2025-01-09	162/9573	0.142446	0.18911	0.126676	Rb1	1
mmu04630	mmu04630	JAK-STAT signaling pathway	2025-01-09	171/9573	0.149802	0.190083	0.127328	Myc	1
mmu05164	mmu05164	Influenza A	2025-01-09	174/9573	0.152242	0.190083	0.127328	Tnfsf10	1
mmu04141	mmu04141	Protein processing in endoplasmic reticulum	2025-01-09	175/9573	0.153053	0.190083	0.127328	Capn2	1
mmu04310	mmu04310	Wnt signaling pathway	2025-01-09	175/9573	0.153053	0.190083	0.127328	Myc	1
mmu05152	mmu05152	Tuberculosis	2025-01-09	180/9573	0.157102	0.192013	0.128621	Sphk1	1
mmu04510	mmu04510	Focal adhesion	2025-01-09	202/9573	0.174712	0.2102	0.140804	Capn2	1
mmu04621	mmu04621	NOD-like receptor signaling pathway	2025-01-09	216/9573	0.185747	0.217618	0.145773	Gabarapl1	1
mmu05417	mmu05417	Lipid and atherosclerosis	2025-01-09	217/9573	0.18653	0.217618	0.145773	Tnfsf10	1
mmu05202	mmu05202	Transcriptional misregulation in cancer	2025-01-09	226/9573	0.193549	0.218587	0.146422	Myc	1
mmu05203	mmu05203	Viral carcinogenesis	2025-01-09	228/9573	0.195101	0.218587	0.146422	Rb1	1
mmu05208	mmu05208	Chemical carcinogenesis - reactive oxygen species	2025-01-09	229/9573	0.195876	0.218587	0.146422	Hif1a	1
mmu04020	mmu04020	Calcium signaling pathway	2025-01-09	254/9573	0.215041	0.236546	0.158452	Sphk1	1
mmu04060	mmu04060	Cytokine-cytokine receptor interaction	2025-01-09	294/9573	0.244862	0.265208	0.177652	Tnfsf10	1
mmu04010	mmu04010	MAPK signaling pathway	2025-01-09	299/9573	0.248518	0.265208	0.177652	Myc	1
mmu05206	mmu05206	MicroRNAs in cancer	2025-01-09	303/9573	0.251431	0.265208	0.177652	Myc	1
mmu05165	mmu05165	Human papillomavirus infection	2025-01-09	359/9573	0.291177	0.302982	0.202954	Rb1	1
mmu04151	mmu04151	PI3K-Akt signaling pathway	2025-01-09	367/9573	0.296699	0.304611	0.204046	Myc	1
mmu05014	mmu05014	Amyotrophic lateral sclerosis	2025-01-09	375/9573	0.302183	0.306159	0.205083	Sqstm1	1
mmu05010	mmu05010	Alzheimer disease	2025-01-09	389/9573	0.311688	0.311688	0.208786	Capn2	1
