# Supplementary material for: Identification of autophagy-related genes in intestinal ischemia-reperfusion injury and their role in immune infiltration
Source: Front Physiol. 2025 May 26;16:1601968. doi: 10.3389/fphys.2025.1601968 (PMC12146356; doi:10.3389/fphys.2025.1601968)
Supplement: Supplementary file 8 [file Table6.xls]

## Sheet: GSE96733（6h）
	Gene	.y.	group1	group2	n1	n2	statistic	df	p	p.signif
1	Myc	value	Sham	II/R	4	4	-20.0898	4.25948750933165	2.21e-05	****
2	Hif1a	value	Sham	II/R	4	4	-16.6694	5.35464545929823	8.06e-06	****
3	Zfyve1	value	Sham	II/R	4	4	4.6665545755028	4.96962001328292	0.00558	**
4	Sqstm1	value	Sham	II/R	4	4	-3.97952	4.13424694025175	0.0154	*
5	Gabarapl1	value	Sham	II/R	4	4	-4.0904	5.80653611005383	0.00689	**

## Sheet: GSE37013 (30min)
	Gene	.y.	group1	group2	n1	n2	statistic	df	p	p.signif
1	MYC	value	Sham	II/R	7	7	-0.96774	11.9035154991725	0.352	ns
2	HIF1A	value	Sham	II/R	7	7	0.412808834432035	11.8798600015818	0.687	ns
3	ZFYVE1	value	Sham	II/R	7	7	0.435599913764129	8.80709349566198	0.674	ns
4	SQSTM1	value	Sham	II/R	7	7	2.65703780600692	9.39726072299756	0.0253	*
5	GABARAPL1	value	Sham	II/R	7	7	-1.4546	11.7893627072876	0.172	ns

## Sheet: GSE37013 (120min)
	Gene	.y.	group1	group2	n1	n2	statistic	df	p	p.signif
1	MYC	value	Sham	II/R	7	7	-0.0431818	10.5433510536158	0.966	ns
2	HIF1A	value	Sham	II/R	7	7	2.92812045630219	11.5471946329728	0.0131	*
3	ZFYVE1	value	Sham	II/R	7	7	-0.0836141	10.9520986433017	0.935	ns
4	SQSTM1	value	Sham	II/R	7	7	2.32882408001683	10.1821229609278	0.0417	*
5	GABARAPL1	value	Sham	II/R	7	7	1.1629721216045	9.2417624211556	0.274	ns
