# Supplementary material for: Identification of autophagy-related genes in intestinal ischemia-reperfusion injury and their role in immune infiltration
Source: Front Physiol. 2025 May 26;16:1601968. doi: 10.3389/fphys.2025.1601968 (PMC12146356; doi:10.3389/fphys.2025.1601968)
Supplement: Supplementary file 9 [file Table7.xls]

## Sheet: mice
Gene symbol	Mast Cells	Neutrophil Cells	Eosinophil Cells	B Cells Memory	B Cells Naive	Plasma Cells	T Cells CD8 Actived	T Cells CD8 Naive	T Cells CD8 Memory	M0 Macrophage	M1 Macrophage	M2 Macrophage	Treg Cells	T Cells CD4 Memory	T Cells CD4 Naive	T Cells CD4 Follicular	Th1 Cells	Th17 Cells	Th2 Cells	Monocyte	GammaDelta T Cells	NK Resting	NK.Actived	DC Actived	DC Immature
Ngp	39.238	18916.4	5776.04	65.8177	65.3006	70.8744	38.672	53.6453	57.474	45.9292	36.5954	41.062	56.5084	44.3979	46.4924	39.0453	38.7517	47.7251	60.8985	207.993	54.4394	83.1821	46.1638	1812.85	3399.46
Camp	41.1048	16257.7	320.913	61.6157	55.4712	52.8501	40.9036	48.8714	51.327	48.0578	82.8888	57.4832	68.8019	47.5147	50.1819	44.9509	61.5476	56.8601	61.6853	179.597	47.9601	88.3198	62.775	650.578	884.455
Mmp8	69.2756	12196.5	572.645	39.4068	30.7063	43.6339	18.7688	27.0284	23.8246	569.888	90.9622	359.047	23.6942	20.1707	22.518	25.4467	29.5366	25.5868	29.8797	565.205	26.4498	27.2702	24.2509	2041.15	4568.5
Cd177	16.2305	11646.9	86.6809	12.6561	10.9159	12.4785	15.1776	11.8828	14.2903	17.2979	18.2357	16.774	16.5189	15.8578	19.8181	13.5438	16.4553	15.4354	14.9082	817.058	15.768	15.0972	13.5221	38.1409	96.7005
Mmp9	34.2733	10154.8	435.802	51.4359	48.7855	47.8811	30.7982	33.8607	35.0698	47.7058	50.1503	45.2617	44.4275	76.0932	47.9938	44.3542	27.5392	51.7276	39.6731	29.9617	30.5989	44.5885	38.0891	261.15	451.66
Fpr2	30.5687	10047.5	171.664	38.4471	39.0614	46.6753	46.2296	54.2655	53.6185	381.757	8546.69	132.599	30.1716	28.6616	30.3539	30.8605	25.4491	47.8249	31.818	2170.37	35.8121	38.2562	26.1239	5629.92	3522.3
Ifitm6	28.6663	9701.39	480.509	34.0273	26.3679	33.6007	23.4008	26.9822	28.1585	91.3608	213.89	41.2677	27.2873	24.5359	22.5293	21.3109	24.5031	33.9835	64.4469	7605.01	26.0193	29.7716	29.7437	392.482	1050.43
Chi3l3	23.0025	9514.75	1180.37	9.80357	11.0649	10.1949	9.23455	10.7049	12.6617	30.0698	13.2332	580.307	14.4747	15.1381	11.1631	10.9384	11.5695	12.5155	67.7718	8353.68	10.9145	17.5484	10.598	6416.37	7930.96
1810033B17Rik	34.8852	6147.61	205.212	38.1102	50.1164	55.8723	40.1737	44.042	41.3483	70.955	80.5405	39.7661	38.3093	37.2084	32.7605	27.298	46.3117	40.7912	37.2544	4014.77	46.5946	60.5632	47.1245	1399.72	1955.28
Itgb2l	69.7081	5640.21	119.137	58.7638	70.739	67.3899	69.6406	65.0346	52.2154	50.3923	74.5075	59.4612	52.309	92.5812	54.0586	52.0502	65.6101	54.8074	51.1057	86.7468	51.8507	57.3961	49.2793	121.21	143.441
Trem3	38.7057	5347.66	212.367	66.85	65.5294	56.4696	33.8534	44.5678	44.7292	43.1169	106.528	39.0051	39.5681	52.0763	41.7452	40.5339	32.5561	33.7207	37.9168	1834.93	64.0402	47.0401	54.8916	207.451	131.19
Nfe2	1117.11	4863.75	3243.66	38.9905	24.2994	27.4668	17.4923	18.5332	19.3147	22.0718	18.6408	37.161	27.2185	30.1331	22.4645	36.3507	24.8965	23.5929	23.8534	2075.64	20.1557	95.2284	30.8273	80.2311	432.576
Csf3r	65.7451	4749.04	210.729	81.1163	79.1	88.191	50.5236	64.1477	59.436	504.925	889.891	890.57	63.8137	77.5386	67.6934	64.5128	74.6508	64.0362	55.1731	1562.94	72.2596	60.481	42.8184	564.002	471.135
Fpr1	25.9141	4740.22	152.718	34.442	24.7786	57.4642	23.5421	32.1169	32.2447	102.765	3854.39	36.5753	28.3927	46.259	31.0687	27.1452	27.0925	26.2989	27.5625	161.228	34.4537	30.3651	22.3537	2026.43	1168.04
Pram1	75.72	4583.12	127.834	223.242	138.311	205.216	55.2137	81.667	67.4685	77.2867	80.4532	59.7802	61.8977	124.626	86.324	66.1809	74.9251	63.5667	55.7892	895.589	62.4249	100.758	77.1418	118.134	278.418
Clec4d	107.287	4548.07	1933.79	36.3056	31.5526	38.3859	22.8567	25.3147	27.2379	6536.01	4872.56	3721.68	27.604	24.5784	28.355	24.2591	26.1679	49.0673	30.5378	312.189	26.7501	27.4286	35.7812	4440.5	3910.66
Sell	30.2433	4200.9	911.997	1458.54	3370.75	113.193	727.766	4363.19	4631.34	25.4144	780.445	28.7835	1425.62	644.36	4251.58	424.709	248.463	40.3015	34.6206	985.611	29.8408	3222.94	1182.01	309.013	186.992
Cd300lb	3411.13	4157.01	4422.64	30.6918	20.7935	22.1763	14.1508	17.857	16.5921	3181.54	646.501	5987.55	18.9382	24.7985	18.9829	18.5252	19.0204	15.971	18.9326	3409.64	62.5159	25.3926	34.7255	107.657	1239.27
Cxcr2	51.0806	3964.65	338.511	160.399	75.2894	140.34	43.0299	55.9717	51.6328	50.9886	43.1558	58.8491	65.5121	80.9316	68.991	69.0087	132.269	95.0472	84.1595	81.4353	95.7103	117.831	97.9713	91.8008	113.147
Hck	54.612	3913.86	2538.55	905.689	1071.09	39.3975	16.4895	36.5673	49.6936	1912.58	4046.72	998.145	32.1314	82.3352	24.5264	22.2953	32.2946	28.5427	25.4847	6533.55	30.8224	85.2132	31.6945	4066.81	1867.78
Slfn1	16.197	3815.98	15.5619	15.5051	15.6552	13.2884	40.4693	294.885	466.334	22.4051	614.506	14.9762	386.341	826.665	613.377	225.049	124.385	1478.65	726.893	848.78	22.0833	14.5078	14.5769	1753.61	287.439
Hk3	38.0742	3491.92	692.656	78.8283	58.108	66.4415	32.7714	56.7291	64.8464	1024.55	3749.74	1041.4	39.7919	63.8575	52.2634	39.9913	32.8834	36.3961	37.189	555.43	46.8112	134.697	86.2354	1598.64	555.577
Ltb	103.942	3267	2065.87	2850.89	3250.96	53.089	1486.16	9130.65	7694.76	79.9766	171.093	69.3866	7072.76	5781.14	9094.09	7354.92	212.936	8462.52	1596.85	229.077	2039.59	1241.52	463.531	128.282	331.211
Adpgk	96.0461	3093.98	249.8	107.998	103.569	131.681	135.524	156.73	211.869	74.2821	59.1639	84.4484	233.105	140.57	175.473	99.8849	251.039	129.81	131.018	127.713	65.3869	74.8288	110.534	76.9919	136.753
Slfn4	21.014	2987.32	18.7734	28.1574	29.8562	28.5309	22.2934	20.806	22.7851	41.981	4949.49	30.5101	29.3236	21.7463	26.9878	29.7424	18.7037	25.4261	23.42	714.783	25.8717	20.8169	21.6039	3067.18	94.3562
Pilra	181.508	2969.85	285.013	20.6237	23.5439	25.7472	19.0255	35.0145	41.8881	102.04	799.78	59.4982	27.0101	21.0312	25.0019	23.2019	25.65	26.9718	23.568	1093.59	27.4336	29.3951	22.6777	1778.07	2080.94
Pirb	928.345	2942.48	1631.01	405.144	424.24	50.5345	49.4521	45.7501	45.6342	1658.06	2177.09	961.919	28.4983	119.729	42.3773	38.0485	38.08	31.565	28.9273	3072.02	31.7487	40.7858	39.4524	1727.34	1422.85
Itgam	18.3032	2898.07	1151.98	23.239	25.2844	23.8837	17.7231	15.6635	17.0147	1580.97	1691.51	1550.03	20.1506	21.6334	23.4843	20.3118	19.9941	24.7106	17.0422	1075.63	23.8943	232.948	58.2626	986.263	1394.78
Padi4	19.9057	2745.44	2177.2	20.8574	21.2135	36.5314	20.2397	22.7684	21.8487	25.5325	20.6618	22.1638	23.2864	20.9837	27.1543	185.639	18.7007	19.7798	24.567	116.591	21.3502	44.1295	32.3346	135.39	230.709
Igsf6	21.9364	2575.08	869.401	24.5039	26.5914	24.1818	17.5486	27.518	23.6599	1674.93	1665.48	1078.53	19.4177	41.4649	20.3645	17.2488	23.9477	24.2802	17.8917	4112.87	16.7476	29.7572	21.799	1423.31	1379.79
Alox5	4358.17	2567.41	2195.91	87.4355	75.7847	75.1421	65.7	86.5552	70.0828	78.016	84.1856	73.0103	72.7903	103.531	74.2727	69.6813	64.9522	66.1741	218.348	346.644	124.518	119.403	103.651	255.782	396.124
Rgs18	3099.48	2456.57	1666.12	38.0544	180.937	11.2986	12.3799	12.3299	12.1584	656.471	23.8914	315.061	12.2959	11.161	11.4673	11.93	11.0699	10.961	16.585	761.4	11.2482	65.5139	84.5698	36.488	190.983
Il1b	251.781	2374.4	866.386	51.6507	49.983	65.6926	53.2124	66.7071	53.7477	89.0402	2652.31	93.3678	49.4467	67.9562	45.4665	45.7105	53.6972	140.358	45.82	628.758	44.8327	105.24	62.5741	7568.6	667.18
Fgr	47.4765	2292.17	550.367	215.943	186.706	111.108	66.5355	65.3888	89.1271	133.286	197.451	190.391	72.9552	88.8901	53.7312	63.0864	88.9435	51.9089	52.8634	2024.88	367.43	184.362	133.487	428.102	604.818
Fcgr4	37.829	2160.03	291.527	34.1665	30.9643	32.2128	29.3436	47.6852	64.8321	1061.29	5424.98	866.11	29.3277	30.7896	27.3648	27.2467	30.7177	28.2347	27.1418	759.3	37.2247	31.4849	28.2402	1151.72	182.994
Clec5a	12.4344	2056.56	150.384	14.3738	13.2961	14.5257	14.4959	13.7003	13.9497	264.504	131.767	275.099	15.5551	17.0062	14.2057	14.1098	16.6767	16.9205	14.7031	134.712	17.0038	14.8667	17.0949	470.208	453.788
4930438A08Rik	26.4127	1999.65	38.3511	23.8322	26.5928	31.0006	27.0955	26.9385	28.2948	27.4712	26.5077	25.7533	28.8041	29.2015	28.0118	27.043	29.2413	28.6956	30.2165	45.1651	38.0957	23.1195	31.8177	36.6326	37.985
Bmx	17.9483	1989.96	18.6177	22.2367	17.328	16.0278	14.2901	14.4823	14.9646	14.5136	15.3125	13.8908	13.8623	14.2724	15.045	13.5752	14.8766	15.1476	14.9132	365.364	13.5347	18.5509	17.5621	14.4504	22.6955
Tlr13	27.1644	1898.43	443.612	26.326	41.2631	32.4381	32.7483	30.9486	30.9018	1980.29	1177.05	726.74	31.6958	23.3958	28.1346	25.5532	24.2926	30.9992	25.8211	2374.11	23.6406	25.6166	25.219	396.366	414.81
Slc15a3	20.6466	1751.64	866.486	130.609	136.023	75.3553	108.139	30.7044	39.6374	1715.72	4617.32	2459.55	189.946	46.7561	22.2332	66.9789	307.139	319.891	35.8914	704.93	20.2064	40.1848	23.7965	4760.07	2092.8
Ccr1	158.494	1746.02	793.051	61.9065	21.4354	13.0449	15.3966	14.6553	13.7817	71.0396	139.454	76.5947	16.5492	13.7848	13.5472	14.5623	16.8957	61.0947	146.474	83.3394	14.0298	12.4529	13.4102	446.756	817.098
Gpr97	1968.81	1637.58	673.364	55.3132	30.4432	25.3478	32.2285	133.885	100.598	33.5298	30.8743	35.4691	39.4688	29.2152	97.2992	36.7469	25.5563	115.001	258.319	51.212	40.103	73.0095	132.401	67.9862	85.4878
Lin28a	11.7388	1614.47	157.194	14.8147	13.3256	15.2715	13.5093	14.1916	13.7069	11.808	12.769	16.1518	13.8452	12.1024	12.6171	12.5787	10.8821	12.6039	12.8094	15.2509	12.9848	11.6583	12.905	13.8608	14.9262
Cd300ld	30.9448	1557.23	185.315	36.2553	28.6115	31.8671	23.5591	33.5898	26.4486	1564.19	664.972	2465.27	29.5901	29.3696	28.064	29.9972	36.0908	31.3919	31.9929	861.841	34.9022	34.5036	32.4711	89.7604	248.452
Tbc1d10c	445.088	1520.25	875.787	986.248	856.225	193.935	616.509	3260.93	4452.14	29.1079	30.1209	28.7314	1892.75	3556.44	2636.55	2528.77	807.993	3102.3	2083.79	133.546	3479.56	1703.7	1225.5	35.6476	91.0283
Cyp4f18	21.1177	1436.29	3036.06	889.471	827.568	159.138	17.9763	18.7099	18.699	144.125	65.6825	86.3948	20.7008	32.7105	20.5598	21.4613	21.7593	17.962	19.3466	2206.52	16.8795	37.2355	20.936	286.406	550.122
Nfam1	58.5352	1402.95	190.956	33.4322	35.6899	27.0839	24.881	30.8057	26.2101	221.914	103.787	218.809	27.2314	27.0242	29.409	25.7125	29.4823	28.6969	31.3961	670.815	24.0765	25.3994	24.6059	168.616	417.539
Fcnb	28.8442	1367.56	48.7724	27.6925	49.7205	35.2402	33.3952	42.0946	37.2282	31.3024	36.0396	30.8002	33.6012	30.2759	39.2918	30.0728	25.648	32.9105	29.7414	80.7213	30.176	29.2841	26.8877	65.8116	71.3948
Il18rap	528.083	1334.26	455.721	65.0943	69.0618	52.4215	400.123	116.824	772.571	39.7009	42.3765	41.4551	100.521	298.665	89.0536	131.247	245.874	306.083	249.168	54.7805	46.9042	2767.67	1445.1	83.9532	123.692
Klra17	28.0514	1289.14	89.5848	30.8105	21.4131	23.6678	17.4305	17.5268	17.664	49.0486	21.7695	26.5159	17.4662	17.8401	18.7487	14.684	18.2867	16.8511	15.0254	28.4998	20.0848	24.7128	24.1903	81.886	74.2274
Btg1	158.629	1277.54	65.6432	769.222	1004.54	42.2716	194.917	3077.63	1435.12	107.529	200.304	112.933	385.351	766.323	2197.5	1555.88	99.7046	1275.98	897.736	549.966	1025.66	4774.59	689.084	162.965	271.456
Il1f9	39.5426	1261.99	85.2479	29.358	38.0012	39.2985	25.0019	33.1824	27.3705	29.16	438.086	30.0587	28.6471	29.1493	28.5633	27.6248	35.8436	28.4516	28.0293	34.927	28.8341	34.038	30.125	1202.04	134.765
Ear2	16.0288	1164.37	15625.7	12.6218	16.766	10.846	12.1994	15.6225	18.3078	22.5911	26.2945	29.5203	14.959	46.8143	15.9178	15.5476	14.1298	11.4648	14.6311	3954.21	15.9944	15.8965	13.3044	844.87	1751.26
Hvcn1	216.393	1140.01	1689.75	4781.04	5750.29	660.094	208.129	871.755	1066.17	834.058	395.538	1085.05	323.287	652.949	760.203	517.058	353.725	636.434	144.966	84.0784	1750.71	641.77	363.453	1073.41	1117.76
Cd3d	28.3187	1075.72	54.6562	25.9811	47.0704	32.1479	4612.62	9589.61	10289	36.2817	43.1771	36.8813	7099.68	3084.9	9276.11	9411.2	5025.9	9480.28	9001.46	64.647	9316.52	129.219	67.2927	30.5066	29.7352
Clec4e	16.9178	1042.96	590.698	13.9506	15.146	14.1411	11.8786	13.0098	12.7739	128.243	1801.72	37.1964	14.3827	13.5553	13.3744	14.1511	13.6888	24.672	12.156	240.058	13.8754	20.9849	19.3658	3685.75	515.48
C5ar1	54.3267	966.594	121.919	20.6442	20.24	20.261	19.8757	21.0748	21.3344	132.071	92.5019	46.4054	21.7885	27.151	21.7223	22.4018	22.4862	22.4745	24.3617	75.3144	21.178	24.7087	23.0921	226.429	495.607
Nlrp12	18.2603	953.602	243.132	22.7774	18.9481	22.3384	16.2026	17.7222	18.2303	18.6432	20.1292	19.0879	17.4258	21.7719	18.1802	19.4169	21.4981	18.5879	17.7064	19.3368	15.2591	21.7619	21.7475	17.1725	18.7036
Trem1	27.7224	933.341	92.9533	36.7337	31.1835	25.1543	30.8804	33.1536	26.4348	31.637	39.9003	26.7562	28.1101	30.5694	30.9693	28.8202	27.6026	25.7789	26.4435	107.87	33.7373	24.8	25.1096	155.482	117.32
Cnr2	110.978	876.625	510.656	860.576	1386.78	13.6518	24.4752	243.511	189.01	202.73	31.6032	288.926	55.3288	29.5367	113.691	51.6435	18.2016	73.5804	37.5479	273.063	15.3526	45.0878	22.2985	19.1852	171.055
Il1rn	31.0685	866.134	543.404	37.6586	36.4723	33.2186	30.1874	29.2239	27.3041	166.654	4441.33	171.359	65.8179	30.7925	26.3029	54.5273	31.0084	38.52	28.6247	58.104	30.9618	31.7594	32.7314	7310.65	1274.45
Napsa	743.402	845.56	3075.94	2035.6	1445.5	445.614	51.9101	48.2058	41.9065	798.236	363.241	709.206	45.5271	57.66	40.5216	52.6293	147.841	110.027	117.981	4774.94	763.576	316.541	237.358	1869.95	3164.96
Stfa3	14.6214	815.018	53.9178	12.9862	16.4235	12.2543	13.4107	13.5262	12.8869	13.701	14.4339	15.6152	20.1056	22.1437	12.8488	251.44	15.2004	17.0626	14.7451	13.0026	15.0208	13.2698	15.4682	63.7594	134.572
Lyl1	1200.13	804.666	1448.08	1926.61	1895.64	632.366	34.1304	36.5625	31.9194	312.869	141.623	205.074	92.021	91.2422	47.0117	58.5753	52.1283	71.7601	41.2355	1753.74	329.103	97.9868	52.2352	91.7174	310.299
Ccno	66.0024	794.567	46.2298	33.8138	32.1939	39.8916	53.3397	50.7952	46.6474	43.1762	51.9808	42.2714	46.9954	40.5552	43.6097	35.8994	46.652	35.8592	42.7099	38.0366	62.9389	31.0178	41.444	39.6807	45.934
Ikzf1	147.266	775.267	149.556	169.444	181.44	151.056	174.562	227.359	152.925	132.319	170.718	139.493	416.572	251.223	385.473	250.563	926.71	1088.43	748.779	508.2	269.448	298.485	212.695	248.029	184.792
AF251705	657.729	745.438	567.006	113.751	101.728	135.944	78.1431	106.406	99.606	3370.78	1119.86	3639.75	76.3365	168.282	93.7944	77.6419	101.331	81.2711	72.2731	1955.11	104.841	96.3161	88.4343	761.083	1557.65
Gdpd3	60.9019	713.312	71.5665	2869.5	1244.32	801.368	31.7828	51.8927	52.2681	2971.37	649.07	2568.77	61.1244	48.2135	67.7108	50.3194	32.5137	53.8203	53.6347	199.905	5684.39	103.073	80.6106	67.1167	99.0227
Tspan32	164.158	688.037	927.232	126.852	70.5301	16.3872	81.4099	589.561	250.099	44.785	17.0652	25.7545	1196.98	1729.3	2442.32	2282.31	97.7427	1323.97	1307.96	128.567	13.5827	451.484	48.3062	79.4972	441.113
Clec4a2	17.8585	662.225	413.178	13.282	13.333	18.9767	15.0493	15.4664	17.8771	216.968	87.6297	135.569	16.078	17.4147	15.6104	16.0793	16.575	16.2255	16.1385	69.2054	14.3097	18.6009	17.0452	39.9754	141.394
Chst13	43.2844	635.225	1328.96	59.2317	35.2124	41.9187	43.9553	51.1641	48.1936	37.9023	28.3546	35.6544	42.4206	32.2712	46.3234	38.8148	40.8839	39.6889	42.3134	59.0169	44.9112	42.6532	43.3629	55.8933	60.9089
AI839979	37.9753	602.492	39.0225	33.2853	50.6401	24.5245	23.4524	28.0637	20.9162	116.458	33.7312	50.7811	29.6291	24.3692	23.4994	25.7159	25.1294	24.471	25.5957	1191.41	26.062	30.5608	27.5971	32.1156	131.974
Rab44	2444.13	600.267	805.315	33.5925	25.0831	32.4974	34.2065	28.3675	30.697	31.0697	38.3137	43.3185	28.998	31.6155	32.3234	31.2459	34.0268	28.5162	28.3144	129.083	26.0177	29.2186	25.0435	53.4397	79.9538
Igj	20.1203	548.123	16.9788	175.332	18.7521	13143.3	16.9142	67.8268	54.499	17.778	15.9214	16.0584	101.818	477.203	31.0967	112.788	24.8308	16.0281	19.2983	34.6837	23.5102	40.065	16.5374	36.015	39.8682
2310005G13Rik	11.8643	504.569	11.7782	10.1647	13.3324	11.0392	10.347	11.6804	10.3465	10.5559	14.1174	11.1365	11.7074	10.602	10.8655	12.0547	12.4283	9.99607	11.6232	10.3273	10.5824	11.2935	11.8356	10.4555	10.6544
Csf2rb2	8692.49	489.506	5685.63	90.3454	26.8013	37.8257	17.0998	19.5096	21.2584	2686.02	1891.19	3754.45	18.1491	20.5023	22.1177	19.7888	19.4143	20.1648	48.4209	408.348	25.7127	21.2664	16.4675	3297.34	4160.25
Myb	1015.17	474.57	1562.83	26.8971	47.3693	42.932	739.279	235.021	396.85	13.8496	14.5338	13.6634	718.175	95.3734	235.394	531.032	435.69	312.267	96.5061	28.1555	21.9566	250.597	164.126	25.3603	29.2687
Aqp9	210.367	464.508	486.161	36.9727	31.233	38.7806	66.7072	36.6773	95.7608	25.8405	28.0633	31.8871	43.0375	39.7539	40.6524	27.0282	35.9707	174.272	881.969	41.5915	32.302	50.4534	53.9673	253.144	168.911
Lime1	95.0584	455.384	90.9222	149.192	75.5978	121.55	648.488	1332.02	1953.71	69.7003	86.001	68.5293	664.607	1048.98	1449.24	2085.12	584.45	1960.77	1016.21	100.326	960.935	424.691	352.085	101.674	86.1572
Olr1	15.1982	446	1331.17	12.2447	13.6875	12.592	16.9972	10.4702	10.029	10.9092	13.8827	33.9142	11.7628	10.3622	10.4707	16.1466	19.5325	13.107	11.669	60.3843	10.6306	10.6026	10.3936	1225.96	341.828
Ifi204	10.1117	412.568	57.8069	10.8292	12.5977	22.1604	11.9699	9.8283	16.0782	511.531	1385.93	266.262	9.11408	12.6194	10.2716	43.8539	9.33327	9.90896	10.0494	1353.15	8.65163	17.5573	11.8494	2590.57	350.641
Cd5l	36.9593	405.251	318.938	34.9687	29.7975	88.8827	24.4001	87.5525	140.088	7157.39	1415.88	5680.25	57.3169	79.4496	29.2917	28.4226	107.215	24.6099	32.8807	37.3701	37.2043	60.264	31.5823	53.74	48.2863
Bank1	50.3945	401.238	189.323	10279.8	9441.61	901.042	31.0759	147.981	92.2847	87.485	42.1946	32.9712	87.855	99.0789	69.1001	50.085	30.9748	31.8414	21.3369	143.852	23.0973	330.476	60.6121	36.2429	61.4077
Il18bp	82.0645	398.706	124.767	78.08	79.5903	104.271	67.1733	82.0731	82.1929	370.495	2546.85	486.807	97.579	131.025	77.9836	61.9432	98.0136	78.6485	79.6187	98.0037	96.8746	83.6884	75.7013	1520.51	362.744
Cd300a	593.885	349.275	421.879	37.2169	37.1082	40.2073	29.859	35.2475	39.758	633.875	131.228	509.772	29.8702	41.6611	31.9461	28.305	33.6349	28.403	29.218	849.347	31.4068	42.0469	35.434	57.5283	190.933
C130050O18Rik	32.4759	349.204	186.749	29.7162	47.2445	33.3429	23.4311	24.3122	22.4334	78.0693	76.2764	61.6399	29.2683	40.5387	24.468	22.9327	33.5784	29.6506	27.5301	651.077	25.2812	27.4254	22.8495	67.162	164.785
Treml4	13.98	325.916	118.841	12.1291	13.4115	18.686	15.8258	32.7197	40.5329	52.2464	104.901	28.9975	15.588	23.9038	16.6001	15.7053	13.9597	13.2456	14.9295	1786.84	17.2737	29.4836	13.4899	75.2405	39.1649
Clec4a3	14.5032	318.414	201.988	13.1481	22.1363	18.1284	11.5232	18.4887	38.3089	2081.3	719.548	2025.83	13.6274	20.8674	13.8557	13.2539	12.8397	13.8246	14.5316	8494.33	13.7573	20.0504	12.9561	657.239	1149.9
Lct	18.0282	300.04	26.3827	26.2469	37.843	32.0775	24.9409	21.863	23.7494	19.1823	19.5699	17.9712	19.658	15.5099	19.3536	21.5722	18.3661	17.651	18.3687	17.4482	402.186	23.5043	28.062	18.5403	19.7669
Tbxas1	983.583	277.988	569.453	35.8466	52.4158	75.3236	85.292	69.8723	71.4024	762.661	636.651	1590.69	54.9641	106.866	68.0353	55.3523	73.0825	58.5583	51.7028	212.899	75.1405	44.8328	53.4948	486.8	1164.23
Irg1	25.4133	250.361	713.95	23.679	20.1029	29.4469	19.86	26.5105	23.238	487.879	10547.2	393.493	22.7865	23.9392	25.0183	40.1021	26.9989	28.8167	22.7356	25.8821	31.5131	21.4699	20.7871	11465.6	1796.42
Tlr8	23.9095	248.307	34.5992	35.1149	34.4823	35.6585	23.5498	25.8697	21.5867	371.113	228.325	552.333	26.9514	31.2027	27.4546	28.7364	27.0109	26.1971	26.0755	301.66	30.3907	43.8441	28.0391	126.177	114.894
Ddx60	14.8804	246.367	30.6291	22.61	54.1199	16.89	20.2606	151.431	155.39	275.328	1789.94	79.3673	34.7214	47.7175	121.231	81.2754	15.1583	25.9763	16.5775	27.142	31.2241	43.3972	22.3131	618.277	31.9912
Itgax	40.5124	246.266	267.528	34.2698	47.3636	38.9593	60.3054	41.9381	144.76	523.078	193.693	703.001	31.9067	72.1465	30.6266	35.1601	39.8706	53.4061	41.4813	290.346	44.6469	1331.8	579.601	1768.25	2403.9
Prss16	32.9412	231.186	45.9556	177.625	52.5058	415.613	72.6854	50.9873	51.4807	51.0028	51.0945	47.6562	49.5409	60.5742	64.4739	55.3296	70.0343	181.053	56.8776	45.243	37.6227	68.2806	63.7297	36.7249	45.6962
Tlr7	22.0839	227.676	72.6844	182.708	210	71.8861	31.8325	68.3791	69.7543	906.964	677.309	769.258	117.028	47.2172	59.9799	33.2751	26.0361	25.9462	22.6531	1203.37	26.606	43.7212	35.9517	453.733	192.3
Cxcl2	15.7768	224.104	600.1	17.9564	18.1351	22.1296	14.7162	16.9674	13.8939	149.919	510.214	89.1946	41.0711	23.3876	14.6681	68.7275	20.796	53.331	74.6407	38.4175	15.3147	20.5112	15.4923	7421.59	920.017
2010002M12Rik	11.2447	223.179	11.9829	9.88095	11.3692	10.3565	11.8659	13.7299	12.0411	12.0195	15.9353	12.2697	11.7871	11.3331	15.5739	12.4606	12.1109	12.3259	11.4261	11.5386	13.3836	11.0952	10.177	13.5821	11.6134
Siglec5	19.3439	216.622	1809.39	23.8602	17.0043	11.6054	11.9087	12.0982	10.8567	203.542	17.9007	102.426	11.3599	11.2834	12.1148	11.6006	45.7	12.4202	11.0116	12.9672	10.857	11.7595	11.5632	71.5404	259.863
Apoc2	24.5782	215.449	210.1	33.2728	43.3667	29.8622	32.348	23.1972	21.4774	809.118	190.612	636.362	24.9518	38.6034	30.6808	30.5623	32.8429	26.0201	29.4635	2257.6	335.278	40.8161	30.3189	933.597	1794.87
Siglecg	35.2796	201.986	162.89	1180.74	750.293	233.808	33.1002	36.701	32.1131	34.2947	39.5946	36.9955	38.1051	69.0833	36.5956	35.211	49.7464	36.3063	35.5224	105.232	39.7905	91.1427	44.5441	133.478	86.5492
Ctsg	228.61	197.722	992.406	44.1139	29.6305	36.834	24.8535	25.2194	23.5629	33.9283	33.1448	30.6055	32.4135	31.4643	26.1457	24.8189	29.1882	26.1465	31.6017	192.063	26.5929	37.6298	39.3433	43.0854	44.8798
Rasal3	70.5264	197.415	96.5616	84.5307	111.645	95.0465	114.414	544.299	637.751	47.5683	41.5454	89.1028	727.196	614.902	788.401	582.298	240.726	1112.78	1159.09	64.9606	548.819	428.077	467.175	37.2217	89.2669
Ldhc	19.9987	191.487	1054.71	12.4568	12.9026	11.0352	14.8615	14.6974	14.8118	13.433	14.1849	14.5163	13.8046	15.015	13.8036	15.2309	13	12.8667	13.1105	14.1794	13.9489	14.9657	12.2084	17.8749	22.3605
Cd79b	28.5355	190.744	76.268	11033.7	11520.2	3692.07	65.0129	251.449	150.68	42.3932	29.0005	41.5168	105.733	184.994	40.3199	119.24	44.1819	51.0854	33.4835	325.385	495.064	221.44	36.0651	30.039	30.4811
Ighg2c	19.0168	188.232	19.8421	355.297	17.1924	16070.1	16.8108	31.1694	24.1925	19.925	24.1289	20.9612	64.1218	83.202	22.1622	36.5055	21.6023	19.2858	20.4444	43.0209	22.6295	26.4547	27.972	61.2115	65.6584
Jak3	133.166	183.364	83.8748	58.0677	64.1194	67.7754	139.499	156.382	287.212	53.2424	93.9555	60.1545	615.915	444.575	188.922	255.501	946.575	1230.5	1341.37	127.836	723.501	179.571	155.295	206.293	158.585
Mcpt8	327.156	172.319	4185.93	49.6716	23.3234	26.9959	26.8712	24.3519	25.2971	19.237	23.415	24.0276	23.6172	34.7318	24.9946	25.8165	25.0566	21.2992	30.5069	39.2071	34.2657	27.6225	26.0852	42.1634	45.3219
Tnfrsf18	618.286	171.797	192.373	105.575	165.696	103.23	1962.43	487.645	702.371	34.462	33.821	35.641	2858.89	549.116	939.275	2755.6	2446.22	1853.37	5209.54	36.7921	782.203	754.8	1023.15	142.527	152.691
P2rx1	487.496	171.179	1255.11	33.7361	30.1549	36.9011	36.2069	37.2625	33.8483	28.3919	31.8734	29.9117	32.1193	26.5024	33.5753	30.2805	35.1142	30.1651	31.588	51.604	29.4774	35.2313	31.5106	33.9743	33.7448
Klra2	31.2585	169.389	23.0218	11.6154	13.0503	10.4055	9.9955	9.89219	9.7197	10.6074	25.4681	9.83364	10.3966	12.254	10.7907	9.92431	11.4086	11.3076	11.086	330.704	10.2855	10.8537	10.5702	23.7857	19.2488
Zbtbd6	17.243	169.336	68.7938	28.0687	32.1132	227.524	58.7093	12.2075	13.5478	20.1276	15.1927	19.5462	29.0191	15.8256	16.187	26.5253	26.6	21.0023	27.4018	24.7076	18.5976	17.4506	43.4959	15.0427	19.09
Clec4n	99.6456	168.464	577.717	18.4139	19.2075	31.9579	17.0871	31.6918	34.7409	501.028	525.014	301.836	16.7725	28.1386	18.0874	17.5258	16.7564	61.105	20.8926	115.794	16.3957	23.3429	17.2116	6981.02	8908.5
Hal	24.6096	162.126	22.4149	18.3792	19.088	23.2617	26.5701	24.1319	26.6393	835.21	71.6162	307.829	25.5994	26.9508	26.4108	24.7798	22.0344	34.612	32.9726	67.2888	31.4879	40.92	29.3629	31.3217	37.4917
Ighg2b	20.084	156.368	22.7759	33.3351	23.0063	5183.18	23.7957	34.6535	26.6693	24.2849	23.299	26.3734	38.5794	42.961	29.3736	26.3673	21.3184	22.2671	22.5581	34.1516	23.5667	21.1042	18.9656	47.4787	46.9713
Pld4	35.0727	155.77	318.322	983.19	700.068	922.694	26.944	37.9442	69.0442	1360.5	1054.64	1188	53.6599	103.004	35.6138	37.286	45.1334	37.7261	38.7128	5290.53	38.2169	89.4366	37.2309	794.396	1809.63
Mzb1	80.1218	153.264	47.7536	2692.23	1831.55	12904.1	61.674	69.275	63.4855	58.6513	65.7428	59.0331	88.0899	91.2659	75.0935	63.6344	68.3074	62.0057	74.0206	96.671	81.133	159.166	57.4352	123.574	84.9989
Spns3	731.966	148.45	1472.99	160.329	177.328	82.2877	56.2019	70.008	58.6982	61.4447	81.8754	63.5388	59.3013	153.261	68.4121	64.4903	70.8427	63.5242	95.7393	111.294	96.9656	77.9796	71.6714	101.968	89.8847
Lfng	41.8972	146.612	65.228	36.8047	31.0723	28.8564	61.2718	78.0043	72.2729	49.9034	39.4434	49.6746	152.726	60.2449	129.392	67.5739	197.159	190.44	288.378	62.3448	64.2839	60.3235	63.5932	51.9496	85.3159
Fcrl1	22.1743	146.017	20.9283	3533.14	3298.02	320.313	27.0414	20.8616	23.1265	111.322	42.1506	28.8835	88.4723	104.436	27.6112	193.281	119.793	29.3437	27.5517	76.9429	28.9541	56.429	23.0484	20.7368	19.9839
Ccl4	1195.2	143.839	522.922	107.63	69.1971	108.814	4231.14	128.734	498.5	420.549	2351.27	453.381	226.839	91.1511	84.1805	97.2705	6956.09	84.4618	68.7523	140.994	1162.08	622.972	812.462	5071.93	426.639
Clec1b	12.4177	141.259	487.749	14.5127	18.3133	18.6218	12.5162	17.4177	22.3691	31.4375	24.5284	24.0157	14.181	20.5087	15.1083	14.0924	12.5857	15.0536	16.0621	207.332	14.4114	20.525	16.2917	25.6128	56.4751
Gm9706	39.6279	139.163	39.4995	24.1708	20.4348	37.4729	60.681	71.5893	83.8219	76.153	2013.67	48.2967	63.8217	41.3212	92.8951	158.331	33.1807	38.8849	45.0895	44.001	47.4432	55.0016	51.0637	2322.13	41.9904
Rnase6	366.32	138.946	973.362	1889.36	1867.76	881.302	10.4867	17.3922	17.6909	20.1794	195.577	19.1664	12.4815	16.6533	12.987	11.4411	11.1812	11.5764	9.89712	3394.04	9.84883	78.2739	13.0018	38.0669	298.849
Hemgn	13.5583	138.173	40.4609	27.5967	71.2511	15.3118	395.969	12.2327	15.0138	12.7169	12.0262	12.18	23.8791	13.0535	13.5322	15.2471	20.4509	110.82	73.2104	17.2742	14.3985	86.7687	903.354	14.2631	14.6808
Rcbtb2	126.972	138.165	169.537	83.801	107.911	418.504	44.6347	137.314	181.825	896.125	92.0185	484.043	91.7075	165.749	148.958	134.45	36.2967	113.52	268.496	154.874	174.495	130.783	212.039	122.364	746.721
Cd200r1	434.448	129.966	121.637	14.0531	12.3689	13.5337	15.7817	19.9272	19.6847	435.985	68.146	362.016	28.748	24.0873	66.9664	84.0783	15.862	49.9899	470.127	16.7263	951.033	16.7607	16.7977	215.235	623.709
Itga2b	5982.25	123.418	2290.74	87.3927	71.6333	91.218	49.4748	61.1018	65.9348	65.8301	61.4758	60.2904	67.5973	55.8263	84.9081	63.1144	52.8646	54.0385	72.2828	145.603	72.8331	67.9766	56.9812	121.732	109.38
Ubash3a	29.1615	123.398	41.9022	29.9314	25.3972	31.4806	264.85	267.874	310.002	29.0288	23.4084	26.7905	537.128	439.039	359.099	408.458	227.183	474.373	563.116	31.9413	27.7031	107.434	123.84	24.5501	25.5869
Emr4	15.2289	119.646	960.797	21.5764	24.0693	30.6882	16.1191	36.2933	35.2704	143.953	16.9237	74.9095	18.8527	22.7318	17.7	16.9342	14.9334	15.9404	14.1004	3149.4	17.4988	37.4526	15.5051	479.922	1228.69
Gimap3	118.382	118.3	58.2747	551.542	386.976	152.399	263.116	1402.42	1869.52	61.3819	62.8097	65.5183	2382.97	3987.1	1732.73	1358.63	1063.45	3463.22	1958.32	118.036	2807.98	1213.12	1144.9	209.615	124.663
Prg2	14.4366	113.596	25141.8	17.8965	13.9377	37.8366	15.8742	17.009	16.3523	22.1475	21.3499	17.6579	27.3467	18.8115	15.162	15.0986	19.3325	13.4483	14.3334	19.6358	15.1911	14.3206	17.6082	1421.6	1523
Tal1	3178.73	109.672	425.657	33.9783	25.2504	35.9529	23.9717	29.1572	27.3257	92.9565	76.2324	83.3525	26.6168	24.008	24.1318	21.7813	23.6371	24.618	23.0438	30.3493	24.3164	27.8788	29.7682	145.364	169.909
Cd3e	57.6297	109.05	44.3716	48.2373	49.8984	67.4662	475.824	1133.71	2931.73	54.3056	58.1749	46.461	1980.61	1523.73	1651.92	1504.66	1532.01	2221.58	1571.78	79.8502	3367.03	63.8894	64.8014	77.4407	53.0099
Cd72	134.688	107.177	206.397	1368.55	2533.51	59.3662	191.837	893.068	637.068	829.333	3569.66	877.71	390.018	229.516	315.744	161.217	56.3594	266.591	54.4899	62.9611	58.8127	1431.94	623.225	329.638	134.037
Trem2	90.2732	106.748	593.502	120.981	87.9608	111.256	89.6306	110.24	85.1367	5166.83	555.554	4707.23	68.0372	111.738	92.6922	76.5548	94.0285	81.3202	84.4614	262.038	74.9352	160.532	111.686	809.209	1836.58
Pyhin1	14.7122	105.625	33.3389	2913.77	4536.84	1170.06	203.142	2596.86	1821.81	433.29	4017	222.512	239.961	2128.52	2142.87	1233.44	22.3757	712.877	344.644	2439.69	459.923	860.216	338.312	4859.75	320.228
Gpr35	35.0872	105.199	101.598	23.7739	24.5126	19.9994	22.4368	23.678	22.2098	30.1722	104.465	25.7007	20.6895	28.1616	21.3571	48.9224	22.8228	21.6351	20.3068	1402.01	22.4271	24.6488	20.8532	204.754	189.827
Cd244	524.323	103.267	156.471	31.8906	25.4729	14.5761	24.4896	18.7793	26.945	20.0642	23.7665	27.7945	16.1786	18.0551	16.6581	14.381	16.7984	16.7764	25.4482	571.306	4046.84	1764.96	1982.47	36.5261	72.2479
Fam71b	21.9568	102.475	16.1006	18.3548	16.5128	25.893	389.459	167.25	89.3589	18.6047	16.848	21.0581	45.3325	21.2985	35.716	53.899	301.185	86.6963	194.179	18.7703	68.3728	18.3409	24.7938	21.8564	19.6259
Cd6	51.6505	101.833	48.6491	56.9044	78.9206	73.6237	750.386	867.816	1120.86	50.096	60.3249	53.4943	1755.2	2081.9	1310.49	1805.37	2824.06	1221.86	291.346	58.5442	69.2856	53.2466	51.2171	76.035	79.1852
Ms4a1	20.0183	97.2415	15.2247	12133.3	10095.4	1315.01	22.2907	44.0111	23.0375	19.4551	16.4921	19.0208	25.7149	73.1469	18.2361	18.3973	18.6916	16.0334	17.075	46.6349	22.4158	280.571	17.6485	23.9028	23.5554
H2-DMb2	45.6983	93.614	45.4413	109.269	112.913	37.8986	41.3286	43.4004	40.5297	64.2463	70.9834	65.2429	58.9004	45.2689	39.8357	64.7763	46.4587	68.2828	41.256	93.5298	49.2979	51.0195	35.0547	986.108	1171.79
Klrk1	34.4326	93.1113	58.2901	61.4585	56.0518	53.8107	1568.64	97.8892	1605.49	52.9305	1217.21	52.0846	60.6459	67.8969	68.7467	44.8832	1646.68	44.3746	41.4362	205.387	78.2516	2536.16	1932.56	516.272	233.975
Fcgr1	40.2697	92.2326	103.952	36.9365	30.7957	37.7546	29.2343	38.2399	41.5036	719.11	2943.22	314.726	40.2655	38.0935	45.3132	37.7139	31.2704	36.9723	42.1047	509.504	35.1149	36.7503	34.0566	1461.65	570.475
Ly6i	50.1707	92.0086	50.8899	46.8735	46.5852	45.2204	49.869	44.6041	46.2992	75.5924	494.919	67.0221	46.6231	42.7943	55.0348	47.2978	56.6833	53.4202	50.5704	389.12	57.7656	44.777	44.1806	2902.36	1161.97
Ms4a4c	12.3248	91.4665	50.2134	260.145	1890.36	14.3015	880.751	1533.6	3266.15	238.967	5316.17	112.042	105.005	292.311	327.371	180.578	48.8061	21.7411	15.5734	4366.76	13.3446	391.03	107.228	2839.36	44.9108
Ly9	23.6475	90.791	408.336	124.466	121.919	137.885	648.62	1092.65	1377.07	1379.06	1358.47	1066.77	638.102	338.848	1168.33	1058.05	292.983	573.035	476.697	131.889	46.8972	313.152	208.57	654.944	250.452
Klrb1a	12.8024	90.6052	15.5386	10.2258	14.3763	10.8536	15.3027	14.9096	14.5605	31.9116	12.7388	21.5105	11.1267	14.781	11.4815	38.2195	12.7135	11.9202	11.9507	13.2585	64.1232	743.501	440.349	15.4798	57.4155
Ctsw	72.8782	88.7785	56.5546	50.6584	33.0235	74.0399	805.219	3664.1	7643.54	39.9863	46.8924	47.0706	2385.72	1406.21	818.405	363.428	392.54	1496.7	206.193	69.6657	7840.42	5483.39	5367.17	64.427	56.7737
Hist1h1e	13.926	88.4943	20.4512	144.965	160.853	142.775	51.248	30.5914	26.7379	13.0887	11.9603	12.1278	32.4307	17.066	52.5847	44.8531	18.5344	86.869	73.9101	21.9366	21.7165	38.4121	15.3279	12.7081	12.4845
Spib	23.8446	88.3164	101.118	2404.24	2032.7	24.8629	27.2107	26.9404	25.0716	22.5362	21.8159	22.1793	38.1299	48.9096	22.7305	28.2782	43	25.0271	19.0082	44.3808	31.3497	87.493	20.4528	152.444	318.583
Ighg1	28.433	87.8886	25.3498	1667.06	26.8952	19649.7	25.5298	25.5966	29.1128	29.5646	30.1285	29.2011	41.3074	34.1792	27.127	30.2684	36.5639	26.8506	27.6489	40.7761	25.2469	21.7814	23.6201	23.0567	24.287
Herc6	53.6286	87.4637	24.49	56.2377	61.2116	45.7384	88.8005	131.084	107.999	158.822	1734.3	106.023	73.9087	64.3084	112.01	99.3316	78.7557	121.112	112.713	95.0518	69.0139	75.2883	98.6088	866.795	64.3288
Gm20199	37.4645	83.3637	39.5777	803.679	535.883	306.455	46.7363	80.3863	65.2719	38.5278	35.2845	43.9667	33.2751	56.2053	89.7469	71.4596	38.6534	46.6772	43.8114	87.1546	64.2083	603.182	258.598	44.28	41.6158
Cxcr3	36.4439	83.3118	60.1807	530.396	38.5658	709.155	408.348	417.276	4701.23	205.728	44.6465	144.243	348.874	4029.27	157.102	2944.7	410.328	50.5899	45.6169	68.5686	373.077	2631.81	1640.97	51.4053	47.6206
A430035B10Rik	40.4842	82.7537	39.4281	26.5924	91.5129	193.674	15.4761	23.504	23.6315	26.8044	19.2509	26.4122	21.6478	15.2488	27.0638	25.2381	14.3073	18.0639	16.578	16.9735	27.6722	25.1081	24.5861	16.6191	21.1075
H2-Eb2	61.2359	81.3958	47.6173	1425.46	1211.38	452.19	94.4987	103.062	98.6003	57.702	104.209	73.5209	69.1658	83.1339	86.6778	70.7755	62.0883	58.259	61.0518	73.094	113.166	89.5884	59.4826	223.4	158.504
Nmrk1	150.145	79.7819	124.54	143.299	30.7841	78.4906	543.483	118.051	151.633	113.331	46.1911	79.2138	35.6083	19.4058	64.9317	35.9778	186.63	133.32	41.9311	14.5798	137.169	31.3042	38.0542	33.1859	35.3344
Gpr114	48.2528	78.5993	54.7713	152.596	72.9555	112.348	193.617	1460.95	1650.03	53.7613	62.3252	61.5695	68.4388	159.827	76.3045	60.2912	105.081	318.325	61.6329	88.5369	1507.94	299.321	399.105	64.3841	79.1851
Cpa3	16771.7	77.9818	9487.62	61.6975	26.2849	25.0845	32.2048	30.8476	25.1525	24.6167	25.6985	27.3079	27.1681	23.5684	24.3884	24.4534	44.6291	22.1728	46.3481	31.5121	41.5353	27.8704	23.5614	64.1924	77.0919
Faim3	20.3163	76.9191	21.7391	5201.17	10557.3	92.3479	106.729	29.5188	22.3999	20.7946	22.4059	20.5744	234.387	205.096	22.7689	92.4972	82.6073	82.3216	322.766	52.2407	22.4888	231.856	31.8946	46.432	29.4374
Ccl3	2169.24	75.9633	3646.82	46.8924	17.4164	16.282	9339.51	29.8106	119.584	564.977	2656.33	282.375	94.7673	29.9086	17.3978	31.3213	9507.29	79.9714	17.5358	102.851	1054.37	1366.88	828.11	6548.09	394.794
Cd4	63.1055	75.6911	55.1471	68.0992	81.9125	79.9382	51.904	56.8965	50.6782	58.6733	68.6823	60.5161	368.922	321.184	260.746	351.333	616.447	2267.12	1095.67	75.2733	59.9371	79.5705	70.1518	75.8421	60.9812
Lck	62.0617	75.3027	48.239	125.424	171.519	62.2168	1731.51	4529.91	5056.19	61.5351	84.5219	54.1057	4549.12	5041.15	5373.37	5737.22	2910.85	4380.11	2231.29	89.6797	5017.49	3500.73	3360.93	126.277	66.6047
Ccr2	19.6571	75.2494	157.978	15.7733	15.2325	17.1841	103.44	25.1204	201.835	49.2838	30.3528	27.044	43.2326	55.3082	26.7272	43.9099	60.9983	483.565	3912.7	2955.43	15.7667	652.695	986.165	184.318	1826.11
Cd7	69.1754	74.3577	94.3607	48.7452	34.0553	50.3568	78.6026	448.824	819.53	42.8862	48.3676	46.5903	141.081	181.939	230.758	87.6862	50.5556	66.9706	54.3079	86.2736	14460.3	888.404	364.027	69.5624	59.448
H2-Ea-ps	67.279	73.6676	52.3487	66.0445	100.038	87.4994	61.042	68.8892	58.8727	1147.25	812.602	1141.06	57.2122	61.7062	61.9779	52.144	80.6582	52.1787	57.5566	76.6614	68.0423	66.4354	62.4679	82.9943	69.184
Gpr18	22.7929	71.6956	604.525	3795.78	3439.38	521.339	481.302	1706.62	1718.73	58.8843	925.801	38.8528	645.556	903.236	1110.18	302.529	1052.42	1277.14	41.9738	846.825	4346.25	890.229	357.694	67.8498	61.3894
Nkg7	48.0959	71.6291	135.103	25.6005	21.332	22.0274	3249.31	2983.42	7888.43	22.1937	23.5159	18.9061	499.743	671.461	161.242	267.145	3522.82	44.5259	87.3373	72.5946	8616.7	7749.92	6636.13	29.2212	25.9407
Lair1	78.889	71.3086	351.676	27.7258	19.9061	19.9579	28.4846	82.9561	185.772	503.38	434.805	902.038	40.8844	23.6052	79.4131	36.8655	18.3642	40.4819	26.2731	272.959	17.6462	79.6645	66.8872	76.1426	120.947
Cd19	40.6032	69.8984	40.4791	624.709	429.654	104.126	39.8511	45.1418	44.3322	42.2188	39.2648	41.3447	50.7715	126.263	56.5914	43.4303	61.5767	45.2151	47.7535	79.0273	56.34	112.109	49.9287	86.1892	64.9303
Gm11346	18.0932	69.6541	18.6082	1501.76	1661.57	122.793	19.5192	2421.12	1622.63	18.1202	16.1226	14.8421	88.6529	927.725	2477.94	294.456	19.9349	139.345	28.4996	15.5835	17.8624	455.091	115.765	12.1171	12.8142
Klrg1	107.452	67.725	202.728	51.4117	27.7267	47.8969	60.4386	82.8883	160.059	41.9717	60.8954	43.695	232.198	982.803	109.654	169.704	76.6221	48.7102	63.2191	63.1093	123.813	3935.19	646.802	55.1768	43.0263
Ccl5	62.1704	66.553	108.655	33.3228	39.2977	53.5548	1739.28	2062.76	13808.7	653.809	15297.8	504.9	195.404	3547.28	1188.92	825.851	3328.54	97.3605	70.1289	121.216	19189	12686.6	3533.52	13432.6	5119.68
BC021614	47.7893	66.0382	38.1237	59.8268	40.3812	64.3613	115.608	349.091	537.888	32.2927	46.3206	38.846	638.047	623.89	539.341	802.483	215.145	445.555	753.699	70.6168	63.1476	65.1664	53.2898	72.1119	52.9538
Hc	25.423	65.6325	20.9464	15.7973	27.2623	25.4134	20.5584	18.0663	17.0217	16.9928	18.4477	16.3036	22.222	24.308	22.0147	36.6388	27.2737	23.3392	422.32	21.5713	20.4529	20.302	18.7767	24.4708	20.9119
Gzma	29.123	63.5325	23.4761	41.0236	54.4593	61.5395	54.2568	105.469	132.398	26.0783	23.0181	25.681	40.693	136.176	117.437	66.9324	5109.07	127.187	7068.92	119.822	16768.2	17393.5	14357.8	30.4461	30.692
Btla	20.5547	63.4668	91.4396	10106.2	11259.8	282.821	420.118	1282.44	1529.27	18.7646	27.0305	18.2904	1182.64	3716.21	1483.53	3252.41	2066.02	1799.83	163.902	1156.13	23.7504	242.587	23.6016	550.497	86.3304
Gm15708	26.0278	62.6363	32.5478	38.4971	19.2201	21.0848	20.3022	42.3495	43.0758	30.0218	34.2695	26.98	84.3594	70.6605	285.598	35.3573	20.6626	29.0785	93.9581	35.7061	21.946	26.26	21.8669	26.5901	26.7497
Ear1	10.5093	62.5867	22212.4	11.6597	11.1359	10.35	9.79679	8.61083	9.6013	11.3551	10.2245	10.2084	16.0658	11.44	11.033	9.48697	15.6385	10.8979	9.14765	13.273	9.76667	12.9359	11.8903	530.124	486.206
Il1rl1	7766.61	62.5478	396.438	43.1719	33.7765	37.3752	85.6011	39.728	31.8332	40.9186	44.8831	55.0785	49.8157	74.5894	40.1746	40.8906	64.7417	36.9392	588.022	31.6715	36.3793	42.9092	49.563	65.967	71.0406
Batf3	51.9509	61.8063	135.698	58.4942	52.3233	66.9255	1180.36	73.4777	61.5734	149.287	244.251	896.062	98.619	51.755	56.676	52.9474	1737.54	471.648	55.1648	275.532	72.5036	95.8666	74.5883	567.332	654.841
Gata1	957.557	60.5067	1637.71	41.7239	39.7592	42.839	32.7538	49.7595	34.3905	31.5436	33.9028	36.0623	197.959	47.8561	99.3704	42.0594	29.4595	43.7437	65.5709	28.8227	29.1639	38.1008	38.2067	43.8413	47.2708
Pou2af1	11.2575	60.4603	9.63237	2923.79	3013.76	4846.15	35.9904	166.702	145.433	9.98906	9.8763	10.1155	65.0758	295.23	112.149	1171.37	348.082	66.0513	11.5004	18.9116	11.953	76.877	12.1893	12.0834	11.6039
Gngt2	154.982	60.3894	61.5998	48.2924	49.4247	25.507	32.2604	56.1676	61.9974	391.673	407.297	211.185	42.7418	35.2908	45.1953	35.2293	36.8867	80.9046	44.7681	1042.96	51.3608	28.3342	33.8423	392.453	210.569
5830411N06Rik	60.5661	60.0302	42.0349	57.4227	59.6692	61.3896	45.9008	57.5027	243.641	43.0291	54.1876	47.1151	62.4311	88.0622	53.9568	58.6811	55.7134	223.139	54.1271	61.3172	74.6748	54.9338	53.6004	91.4132	81.15
Nrp	125.385	59.5741	56.7863	192.332	193.251	199.007	167.114	233.888	172.682	78.1179	53.4927	88.5622	224.791	92.8436	246.348	173.02	297.627	444.056	494.801	85.3692	98.6519	178.192	184.98	76.3556	123.314
Cd209a	19.8559	58.9359	52.1138	23.8163	26.6962	21.3969	16.3601	18.2184	21.8298	19.7485	17.5215	17.3517	17.9964	18.4173	18.5868	16.9136	22.479	19.0408	18.995	726.675	20.6245	21.8638	18.2312	26.6246	58.3389
A430088P11Rik	39.4245	58.3718	23.8253	52.0277	70.8926	27.7865	44.0687	140.529	176.748	32.5158	30.8339	32.9142	41.7477	35.5541	86.0797	66.0234	30.7933	141.299	72.5456	23.6868	38.2489	35.7372	44.4669	18.257	20.8547
Folr4	47.7802	56.4432	35.8962	51.4671	105.148	38.6744	82.6204	118.084	78.1931	41.7081	42.8432	43.238	2690.35	1807.14	382.102	2040.82	325.168	138.418	953.833	49.2057	60.3033	63.5991	48.0768	43.6274	40.1208
Tmem202	18.3646	56.3998	28.7464	10.5476	14.5114	14.2298	15.2449	14.7803	15.7698	63.6084	66.4809	122.742	15.5421	15.3041	14.027	12.3056	12.9115	13.5958	13.0413	12.9906	12.5899	13.0878	14.3088	26.5881	22.5377
Trac	46.9517	56.3016	51.0425	45.9431	48.938	59.2151	3087.52	7317.59	7627.43	43.353	56.8739	47.228	5730.47	4205.13	9046.3	10725	3330.15	8812.8	6048.06	88.0592	5071.68	155.098	125.591	52.2091	50.9325
Klrb1c	52.6081	56.2245	39.0403	59.3311	52.2229	51.1197	49.3759	54.0123	160.187	45.8407	42.6769	43.913	51.5281	112.462	59.0885	106.374	48.0755	43.5628	44.2329	68.3662	52.2179	6022.37	4087.15	61.1692	54.0058
Blk	45.7401	55.7406	36.184	1032.23	913.853	133.078	40.7615	50.3027	49.4613	38.7308	40.1788	33.8978	58.8659	73.6024	49.24	52.7493	47.4847	57.2548	40.2222	71.7084	79.1448	80.5164	36.5507	102.128	75.9797
Prg3	34.3085	54.1663	9426.93	37.1939	27.3189	40.9941	33.9201	36.2129	34.9386	27.8979	33.8198	27.5755	30.7232	27.1158	34.6428	32.2108	35.3869	28.5146	31.6574	40.5454	39.3868	35.6041	34.9914	111.693	97.439
E230029C05Rik	17.927	53.6761	17.8948	25.4041	17.0006	19.4128	32.1657	21.0659	17.2938	23.371	25.5901	29.1877	22.5714	18.2288	17.5519	21.2287	24.4769	17.6476	24.8841	293.491	21.2441	18.2103	14.6333	43.1646	76.6196
Flt3l	404.703	53.589	111.231	13.354	16.205	14.9003	60.0829	278.009	317.487	58.9398	106.889	43.9118	300.157	54.0452	654.57	242.894	116.042	482.377	1084.45	36.5038	256.351	58.2342	108.353	30.1508	36.0554
Bach2	218.751	52.7448	32.7036	1264.23	1459.67	18.6219	592.638	1776.77	927.417	38.5961	19.0077	41.2776	972.389	603.778	1936.56	186.987	1154.02	1470.48	214.86	75.5284	24.4031	791.032	281.792	17.1519	24.8646
Cst7	5370.82	52.1608	1177.24	26.7866	17.5207	31.7458	783.926	984.663	2932.69	39.6441	2388.45	71.5488	493.077	1220.96	189.346	1606.83	1728.91	1564.9	3707.06	55.4259	4212.19	1348.4	1033.29	445.694	62.5744
Cma1	22407.8	51.253	54.248	39.8079	36.8591	41.9894	32.7781	33.4593	30.0592	28.7257	29.7663	29.7039	32.2026	45.4094	37.4542	34.1576	46.5749	40.5603	42.6968	64.9665	45.8912	953.42	177.11	48.837	37.5692
Lat2	5396	50.8077	650.203	23.2907	16.5384	20.844	34.3367	24.4081	30.9385	1563.34	857.086	1301.08	33.9339	21.7739	27.2188	39.7038	128.659	34.8646	146.139	351.047	1507.55	156.988	329.693	420.108	561.04
Tpsb2	5785.3	50.7451	44.3625	46.9197	47.0066	49.935	47.2259	52.8615	44.6789	38.0651	40.4006	41.044	43.9492	57.1239	48.6516	46.861	55.3066	46.6012	45.5112	47.3052	62.2265	49.2951	55.6203	60.6091	53.2268
Endou	43.6749	50.4013	35.0319	125.976	228.172	1517.6	43.2776	46.271	36.7364	42.0444	49.2147	43.6206	41.6681	39.6749	47.5405	44.9333	40.297	49.7572	38.8662	45.0134	47.6692	41.423	38.461	56.2277	45.5709
Fam26f	12.72	50.3373	17.6001	378.548	907.027	187.303	106.432	840.465	998.89	472.069	5471.76	149.716	222.525	579.677	660.458	332.399	27.9265	87.509	22.3963	752.276	245.901	720.551	704.903	1619.78	38.8411
Tifab	18.2096	50.1268	48.9394	17.772	18.96	23.8586	20.2495	22.2165	21.1454	105.317	133.874	184.443	19.6323	21.8277	18.2392	18.8576	20.6689	26.0302	20.7487	1326.47	20.7525	22.6421	18.2284	160.653	597.458
Ccr3	17.5742	50.0493	872.682	20.4387	15.5306	17.0388	14.9179	19.2508	23.5511	45.6477	20.0424	28.2033	23.1008	12.6909	13.5693	15.604	15.4346	19.1026	25.4226	15.9307	17.9272	15.1587	13.213	23.1858	22.3196
Trbj2-1	34.7981	49.8705	71.9333	44.2039	68.1392	106.678	693.767	1770.05	1475.7	76.0412	46.8956	59.896	1151.75	1115.81	2931.95	3064.5	860.516	2690.61	1473.85	79.8024	1140.43	168.863	145.593	30.4888	30.7464
Fam169b	22.5333	49.691	44.1916	257.108	266.133	158.702	266.278	545.764	611.249	19.6859	22.6439	21.6537	530.275	545.631	542.029	394.396	182.698	351.336	61.7113	24.4447	44.1594	26.0425	24.706	27.5244	29.7373
Tlr1	12.5365	49.66	133.503	2518.19	1526.09	12.8594	114.203	1777.42	758.409	583.198	1267.43	475.685	476.826	1206.87	929.544	717.833	31.1287	384.827	605.349	456.349	12.7093	40.3027	15.1092	667.639	104.818
Gzmm	44.5387	48.9247	38.2413	39.0883	41.2557	49.9974	66.0606	91.6609	2454.35	38.4153	38.9723	42.0628	51.503	77.8171	62.8816	52.0545	40.4778	40.0541	44.6341	46.7194	54.3881	99.653	67.0715	42.6355	44.787
Tnfrsf13c	34.4465	48.4122	37.9348	4870.92	4698.49	1883.15	54.2527	72.296	63.5083	37.3405	41.8184	38.5486	57.444	39.1653	33.9525	50.2247	55.6825	33.8967	33.28	40.6309	56.5457	161.275	62.376	39.3651	31.6926
Cd22	30.4279	48.2147	41.3585	732.566	644.799	34.7254	28.6757	33.1741	148.122	171.816	105.691	160.01	42.1026	60.856	32.5526	177.077	29.6406	32.5313	35.3182	84.8026	33.2444	102.795	35.277	55.9658	65.8321
Slc18a2	5989.4	48.2038	1819.15	16.4982	18.058	11.6708	16.9874	14.745	12.971	16.7481	14.1045	12.9938	14.2008	14.7038	14.5673	18.8127	17.266	15.3334	15.0221	22.9564	16.1482	60.791	33.1873	17.0011	18.991
Ccl1	176.78	47.8918	32.9434	27.3728	26.2613	39.5607	316.933	36.6317	33.7194	28.5631	39.8705	34.5309	83.4766	67.6544	36.3594	44.8288	1002.55	35.5265	44.4874	44.2258	31.815	48.6845	61.1266	41.8973	29.679
Klrb1f	26.0087	47.6807	150.111	62.063	32.8654	19.3961	23.1752	32.0553	80.5102	16.331	17.3338	17.1015	35.6436	53.8566	36.35	59.9628	21.0384	116.692	20.0515	122.248	49.4027	886.813	632.577	39.0295	58.3792
Kcnk13	37.3556	47.4625	139.63	80.6118	74.2975	44.9562	45.6022	45.8063	43.6718	445.362	187.03	380.756	46.2016	52.8132	41.6214	40.4658	44.1567	45.4195	42.4847	92.8727	55.8199	44.3312	39.2973	175.056	312.984
Bcl2	448.055	47.3264	76.2825	346.794	271.099	45.4673	356.632	871.152	1543.25	49.5225	44.4255	61.2139	427.383	513.418	974.258	286.902	307.598	1306.98	1508.55	129.277	1344.54	798.499	1724.65	41.2357	46.3833
Msr1	37.1801	47.2686	92.408	43.7745	44.9934	44.1444	39.2475	40.1851	38.3466	897.083	1799.43	611.927	40.0122	30.5515	38.9433	33.4577	33.5401	36.5572	34.0402	375.582	35.4326	32.9944	35.5027	876.346	625.432
Slfn5	23.579	47.2212	27.6139	25.5602	26.4612	19.1923	20.8735	36.1193	30.9647	283.847	761.866	113.55	27.7627	25.1514	68.0738	54.6365	24.5578	28.95	26.3252	82.4096	23.0432	23.7947	18.8476	162.309	36.053
Sapcd2	48.2184	47.0638	44.3722	32.2985	33.0015	230.911	89.9054	33.298	30.5601	35.421	35.9654	37.3413	68.5662	39.2354	35.9442	53.6907	86.155	63.2387	85.6325	38.9804	37.5692	34.1259	68.5329	32.4016	36.5651
Il13	217.683	46.3906	214.262	48.3946	47.9694	49.9278	57.1139	45.1006	35.7487	36.4499	40.7563	38.2388	35.7436	37.2	35.9449	39.5198	86.5457	43.9336	965.369	33.3702	29.2954	35.0363	32.9023	29.8226	26.5362
A430093F15Rik	22.5621	45.9683	20.4965	24.3312	26.9682	28.9642	398.029	168.556	335.32	24.086	22.2577	23.2729	937.003	484.478	264.53	1094.87	903.19	551.21	243.117	32.7341	23.0482	26.3097	21.2224	38.0892	32.936
Mcpt-ps1	2247.16	45.9103	28.9332	42.2668	39.807	36.2458	29.5089	29.7577	30.0568	29.5498	32.3533	29.4367	35.5591	36.0688	31.75	30.1986	37.5357	36.3143	30.7912	34.0719	39.6332	39.0741	39.8068	46.7074	39.0963
Kel	35.6437	45.3639	29.682	34.6728	39.9557	45.6496	31.5238	33.4049	31.8931	34.3474	36.4735	36.6647	38.1305	25.0448	36.2058	32.426	31.8922	31.173	305.597	34.665	36.1601	36.3935	33.9987	36.9226	35.0024
Slc9a9	38.1919	45.3561	45.259	19.4075	22.2924	21.7078	33.6102	94.8872	132.236	340.704	27.9315	322.093	48.3346	94.8492	102.641	314.674	24.7404	112.379	71.6995	86.4233	49.3155	95.7826	109.151	19.9195	28.479
Ccr6	37.5953	45.2678	34.6435	2518.89	1103.72	97.2815	59.7792	53.7157	51.3097	34.8765	37.5501	37.4735	714.105	548.011	71.1721	299.933	110.957	293.451	37.2429	55.4089	66.773	111.124	64.0628	70.1608	63.7339
Saa3	122.939	45.2649	314.516	30.5491	33.063	32.6665	40.961	48.211	37.0501	684.739	12239.2	505.74	43.7843	68.4983	46.3305	44.9702	52.4121	65.0774	40.2105	62.4637	36.9746	39.5224	34.4829	13036.5	3503.7
Tg	136.233	45.0767	21.4083	29.1903	21.1034	384.451	531.574	23.3669	28.5912	22.5187	21.4537	23.01	65.8254	30.89	26.9884	69.446	332.807	234.138	166.254	24.4077	25.341	28.2904	25.9234	29.3864	24.6169
2310007L24Rik	30.2968	44.3058	33.5645	32.3241	40.5253	46.9442	26.4166	29.1759	30.8049	28.1692	30.7332	30.8779	45.2129	49.4075	34.7555	30.6481	39.2681	111.935	33.8764	35.9506	32.7396	31.5967	42.1721	34.0261	32.575
Zbtb32	30.4813	44.2871	34.5895	77.0351	30.5363	33.7868	1049.28	49.5084	62.4367	31.4035	57.325	35.0712	189.849	64.8014	46.3709	139.487	1171.42	104.657	70.271	44.0598	32.5357	33.8155	148.558	31.9186	32.6565
Lacc1	64.2192	43.4727	79.466	55.9997	48.0262	31.486	30.7257	27.9871	31.7626	169.731	1335.36	189.733	40.919	31.438	27.5675	39.0603	65.7563	39.224	34.8875	138.633	46.1818	29.2187	29.091	1378.88	518.49
Ighg3	44.1245	43.2821	30.6825	820.226	57.3997	15726.3	42.232	44.8118	44.0964	31.5584	30.212	28.6084	79.9655	69.0628	43.0276	58.5198	48.2526	40.0058	34.792	44.8319	33.4285	38.7367	36.4323	32.8402	36.0719
Zap70	37.3176	43.1454	30.8477	33.4153	46.4877	31.1996	830.753	1264.08	1609.42	41.4971	45.2943	41.0643	1536.37	2088.13	1436.14	3164.78	1002.33	1696.97	1767.68	32.1413	2372.85	1353.95	948.361	59.033	49.3231
Cxcl10	49.5253	43.0586	106.146	36.4247	35.8399	27.7422	82.5695	42.5183	113.445	137.821	9587.37	56.1322	52.0828	95.6121	32.6567	599.912	64.4058	41.0758	28.3425	146.806	28.6692	37.8305	26.7106	11275	142.979
Kmo	29.0192	42.8441	105.013	766.469	1641.54	236.829	33.026	29.5437	27.2395	39.7493	43.4361	39.2329	28.0761	40.443	28.6099	26.1042	28.626	27.1562	24.0553	142.103	23.3302	53.713	25.1079	83.8505	159.735
Spic	11.9254	42.5721	44.2702	29.5329	21.7238	13.0345	12.1055	18.9798	35.7083	115.213	292.259	40.3199	13.238	19.7283	11.9603	12.1806	14.1551	12.3761	13.4186	47.0631	12.0745	11.4405	11.9403	50.7577	14.3686
Apoa1	26.6541	42.4319	27.3523	23.8197	25.2155	30.9162	28.0251	31.2106	27.3528	31.5991	32.3341	30.5485	31.0435	36.8776	38.8296	35.5452	34.3587	32.0026	34.6287	33.5873	2801.5	34.1725	32.9601	29.769	27.0629
Fam129c	37.7233	42.0496	28.2639	1282.74	1768.45	41.7261	44.0021	112.949	115.691	34.0421	31.8006	36.9592	89.0534	48.7153	85.7355	74.4573	26.5372	46.6438	53.5766	34.3685	100.928	62.2229	29.205	53.1076	48.5707
Alox15	31.0707	41.9711	6918.49	50.8816	28.3182	43.2919	26.9177	36.7433	31.3543	31.7281	34.6438	31.5993	37.2285	30.3679	36.2176	31.688	29.7127	30.4635	33.803	37.7221	33.8784	31.0832	32.4962	86.865	87.8455
Clec4b1	14.348	41.9543	19.1946	13.1816	12.3112	13.4769	15.4775	15.2813	21.4567	112.506	14.3253	33.0048	14.3825	15.6424	13.5253	14.2673	14.1519	13.998	14.5138	126.988	12.8059	15.3175	15.0717	90.3613	617.728
Ch25h	35.7935	41.7642	64.0256	29.2393	37.0546	35.2699	28.8567	26.4531	31.1735	32.6325	1588.17	69.0419	32.7976	24.6869	33.5053	33.7659	27.8973	31.5837	30.8929	28.6669	37.8122	28.6464	25.425	2015.08	70.7645
1810011H11Rik	521.614	41.7297	49.5666	25.495	25.7143	17.4315	23.75	27.7248	26.2503	152.885	49.9159	302.748	41.9669	44.7036	31.2812	27.2324	21.7568	25.8502	254.251	40.9846	117.236	23.7036	23.6983	29.1628	79.0496
Dcstamp	34.8053	41.0306	53.8825	47.7862	46.5068	50.9914	37.1574	36.6472	37.9702	163.58	95.9215	127.48	41.3537	39.1665	44.9432	43.3289	37.8164	35.4607	40.6762	46.2048	51.8577	48.8483	42.5886	1153.9	1087.44
Bambi-ps1	22.1914	40.9047	50.3341	19.9308	17.4275	17.5797	35.8026	251.566	65.6829	90.2656	826.555	45.3475	75.5348	47.6277	540.544	186.226	24.7685	161.985	33.7958	26.754	33.3332	20.2438	19.7154	288.215	24.1272
Klk8	755.299	40.7269	34.4733	51.9029	54.4529	38.1176	707.606	2127.91	2665.11	41.1377	42.5554	38.7151	1430.78	654.805	1295.51	760.101	390.181	1123.29	2510.46	55.6376	1297.51	137.72	123.699	42.1479	41.7627
Ido1	25.6784	40.7072	23.049	52.8976	29.0759	320.056	26.3964	26.6349	24.8704	23.0505	227.068	25.0848	23.9808	23.141	24.8855	24.1654	28.3993	26.8077	24.942	29.1676	52.2207	29.2922	24.2886	35.113	31.5592
BC051142	29.9406	40.6504	23.4956	452.795	82.2233	73.8409	25.9589	32.4165	34.7029	27.5687	39.6047	32.0898	28.5574	70.7135	30.3639	34.6218	36.9623	28.709	28.2294	38.6818	25.3213	50.813	39.3952	30.0873	24.6743
Cryba4	46.9941	40.4132	21.5554	19.7051	18.8336	155.045	23.6431	21.6574	22.7211	33.9724	36.0883	26.8004	20.8598	28.8733	22.8898	20.9257	21.2434	22.8585	22.2083	53.1285	19.9161	22.3608	21.1022	19.503	19.8276
Tfec	17.4924	40.2256	173.466	17.6972	18.3459	15.9821	16.2844	19.1862	27.6901	545.289	129.719	1731.94	15.7545	25.8091	16.7455	14.6938	17.3739	16.9508	14.3614	155.186	15.3908	17.101	15.8485	721.565	1073.6
Ccl17	44.983	39.7459	127.342	38.061	38.9001	37.9652	34.0903	39.5935	34.8194	35.972	42.4325	37.8053	43.3917	47.7418	39.5562	37.3472	55.192	38.8265	40.6659	37.2013	49.0149	37.1385	34.93	7073.22	5904.92
Lpxn	3271.74	39.0467	653.581	662.674	626.75	146.976	1088.89	1228.9	1642.76	1933.19	1643.16	4185.78	1768.34	1886.62	497.771	2216.02	1258.49	2553.02	1718.69	528.758	2596.35	559.513	947.728	823.501	863.983
Msc	49.964	38.9943	45.3577	42.4113	49.4457	103.053	45.6768	43.6676	38.2789	40.1163	32.9158	44.2264	43.1594	54.3426	42.6505	39.5104	228.591	186.924	45.1221	61.0854	57.5615	41.3415	44.3961	50.6073	43.6503
4930486L24Rik	303.455	38.9763	44.481	37.486	60.4584	43.7426	128.726	130.305	261.373	59.5345	117.933	47.0691	102.295	88.0161	99.964	57.6607	57.5028	331.677	1021.53	42.3534	84.3261	456.619	385.214	31.2371	26.8524
Il12rb1	51.7337	38.7502	48.5657	64.9407	56.0257	53.722	293.023	75.3392	156.561	31.4521	365.529	30.3063	314.477	240.488	55.3075	196.279	472.645	258.723	633.209	29.5162	228.218	204.361	531.564	81.1283	36.6474
Prf1	37.587	38.3399	45.5022	93.3279	51.891	66.9082	1588.62	485.506	705.179	57.4043	76.2008	59.5538	62.8444	82.2945	301.208	64.0035	2451.53	46.9508	89.4955	38.4487	260.252	6578.77	5559.92	41.8437	37.8379
Ms4a4b	11.9138	38.3255	33.3134	17.7547	24.1716	11.3254	8090.26	12666.2	13146.1	35.6988	70.1013	18.2179	2070.4	13489.1	10860.4	9573.6	1038.31	2918.96	481.587	580.82	11.5003	9371.24	6853.65	59.1659	18.4552
Irf4	27.533	38.1657	48.9198	304.842	340.238	1641.41	422.856	41.4131	36.2877	25.3937	29.519	94.0459	508.759	133.829	39.2722	157.956	1554.51	317.43	250.4	152.648	29.8826	48.2601	38.0787	448.292	272.337
Gp1ba	1491.84	37.844	265.605	22.4368	16.7991	22.2379	21.8287	19.8989	20.1766	26.1526	34.9501	32.5244	19.6768	32.185	22.1493	23.0101	24.6288	20.8485	27.9031	31.7403	25.739	27.4572	25.2556	24.9512	22.8661
Il17a	44.0364	37.5943	38.3589	48.385	53.2183	67.588	75.8484	53.426	54.6424	49.3806	51.6232	48.6147	46.1898	31.9133	42.842	43.501	57.9554	2316.78	56.1518	46.8385	40.6143	31.1717	33.7291	68.8772	54.5557
Cyp4a12a	1002.28	37.0414	46.3728	36.4925	50.2971	49.9731	30.0327	31.7299	30.0127	30.4308	32.1466	41.7705	28.8169	19.2712	27.3383	21.9179	19.5829	24.6925	26.6637	56.075	47.8516	18.0461	26.9377	66.1991	71.9742
Tpsg1	5318.14	36.5302	35.2334	23.5568	35.6467	27.5585	35.3484	26.3996	26.4804	25.8197	29.4103	25.0533	34.3194	25.1225	30.8775	30.5549	38.3969	31.3468	35.433	28.6374	29.9264	32.3209	44.774	30.0432	30.3599
Gzmb	15938.4	36.3557	124.86	30.0675	23.1342	35.9429	18487.9	71.2863	198.243	24.6521	30.4665	24.7842	290.004	167.111	44.2627	121.492	17495.3	301.431	14381.4	36.9195	18288.1	3679.04	17092.6	35.1701	29.688
Tcrg-C4	33.9052	36.1307	33.5914	50.2535	36.7575	33.555	155.279	77.5526	248.132	24.6128	23.0484	25.3308	81.5621	123.231	47.9719	31.1393	1537.16	94.8584	111.368	45.4719	9307.52	272.671	280.555	36.6923	35.3964
Cysltr2	39.5104	36.0269	29.2046	29.522	33.8525	47.8787	43.9803	52.3249	71.5825	40.9274	263.414	50.1533	39.3542	56.3868	41.1477	69.1636	33.1544	260.989	81.7572	26.5017	201.235	105.112	124.272	50.3381	32.3592
Ccl7	1782.11	35.9723	300.985	26.3685	20.7393	26.0663	21.8187	24.852	25.9629	62.8505	2529.61	212.872	28.7389	19.5201	31.2246	25.2164	28.4382	23.6686	24.7091	26.7401	30.5292	24.4896	23.6446	850.311	53.5385
Cep97	55.9724	35.9078	51.2607	55.8948	52.2495	37.8871	75.1589	222.227	90.6011	41.2433	41.8022	42.6674	119.868	130.094	282.279	139.794	77.1158	274.273	94.6981	37.1311	53.8292	93.8977	92.4879	25.1866	29.6787
Il2rb	29.8217	35.8231	31.2957	32.4252	24.2138	36.1968	914.261	272.119	2249.94	28.5795	32.4929	30.4675	1393.74	539.354	108.363	639.555	2183.26	565.518	500.176	28.3702	2747.97	809.339	1229.87	28.4956	25.9618
Tcf7	37.2215	35.6947	48.7923	59.7576	44.7917	50.7894	351.553	2327.12	2514.85	34.8215	35.0796	35.7429	858.837	1490.58	3738.58	2629.37	280.131	4004.77	61.0021	56.1172	268.654	227.06	165.924	58.7207	64.9811
Gpr132	24.5859	35.6918	30.2018	24.8448	32.4096	29.4143	34.3126	44.7344	45.6161	25.2841	33.2155	24.784	53.8832	35.2344	70.382	45.6875	262.426	208.029	103.211	42.7129	36.8854	28.4572	26.3281	65.6663	64.927
Lag3	142.594	35.5292	53.083	33.0742	36.0592	31.4663	128.866	36.9329	52.5798	38.1766	38.3879	35.2592	152.206	100.769	37.1737	546.213	319.422	115.398	53.0129	33.0933	1220.57	46.9767	46.9195	43.1028	36.6339
Fosb	565.696	35.5288	32.1213	57.2174	33.6356	71.1653	32.6824	51.23	124.39	23.0286	24.7144	20.9633	40.009	25.2433	43.2497	79.0002	54.5124	25.2277	79.5764	64.2375	43.8342	145.266	28.106	35.4452	29.53
Alpk2	59.6857	35.4522	26.7594	123.832	68.0783	267.01	68.5137	38.3791	44.7092	31.0795	37.6377	32.144	46.9313	31.8447	31.5434	36.1426	185.413	120.056	43.3037	26.301	38.4682	31.7651	30.7083	319.023	78.975
Itgae	63.064	35.3739	88.6118	180.986	74.6032	64.7868	37.7269	1468.69	152.009	32.9513	41.0621	29.6786	262.452	303.819	47.2041	188.189	39.0882	59.6103	36.1447	36.55	10246.8	101.812	51.9477	40.9746	51.5529
Cd40	35.9922	35.2896	82.819	1621.47	1394.42	57.3848	38.3268	42.6189	38.8709	120.872	3162.61	421.13	99.8262	61.4997	43.3543	40.9219	62.1191	53.2176	43.4733	271.572	31.3713	55.6389	37.428	3038	110.995
Timd4	17.1071	34.2275	16.0669	20.5116	26.6725	25.743	22.1295	22.3133	25.7851	27.9001	459.621	22.185	19.092	18.3569	17.9534	16.3107	17.4627	17.1109	19.8945	20.067	21.3117	18.4456	19.8215	20.5619	19.1934
Piwil2	27.6013	33.9257	42.3153	39.7431	24.4918	89.354	30.4511	19.1213	20.5617	28.1631	29.2484	23.9748	31.4132	25.7199	25.1273	24.7095	36.7133	163.9	261.447	25.5273	28.6544	26.5686	35.4991	46.7322	42.9648
9430069I07Rik	27.7018	33.7241	26.1945	27.2187	25.2317	192.72	26.2437	29.9188	31.5998	24.8054	24.8663	23.69	32.5552	31.2292	31.0916	32.6606	31.1492	29.9459	32.7101	30.6664	27.7413	32.0552	33.3214	27.9906	25.9563
Ms4a6d	62.2507	33.4269	564.291	16.875	11.8266	15.3105	163.44	182.683	372.059	2950.86	6755.84	4457.37	31.8542	90.1418	101.473	291.483	23.0532	29.1508	23.9609	1544.13	13.7098	23.133	14.9036	3950.33	869.519
Zfp94	30.8547	33.4129	30.8514	373.375	327.562	67.054	51.4906	67.4288	72.3163	43.8262	32.1249	41.8614	63.9089	48.4947	65.6998	56.725	36.1287	60.243	45.2417	25.4941	30.2344	30.402	39.4576	24.0817	31.1037
Slamf6	33.1733	33.4053	28.9135	331.756	244.621	350.604	48.7397	400.854	287.576	50.1893	224.558	90.7982	236.406	1060.98	463.721	1300.86	114.128	125.163	32.6046	44.5833	66.2185	90.3327	44.5457	155.548	68.2708
Slamf8	18.9907	33.3795	88.6171	15.2587	19.6101	17.9044	19.0551	26.6391	25.5397	34.3938	474.827	46.2241	21.1366	18.0777	24.7342	24.152	16.6086	24.4194	19.5378	649.151	22.151	23.081	19.7571	943.326	433.182
Cd163l1	35.7087	32.9909	31.6617	31.0721	32.966	32.717	43.0761	49.3279	692.535	34.6134	34.2604	36.461	43.3964	65.791	34.535	52.5445	42.4607	141.724	37.1332	31.7803	36.8018	78.6148	77.7547	29.4566	28.2558
Tnfrsf25	25.3579	32.8564	40.7049	44.8969	19.6178	21.4374	40.128	200.744	211.519	25.147	31.4034	27.9353	502.051	1142.86	644.703	409.828	137.891	527.44	91.1034	22.2251	24.3926	95.7025	50.3925	26.6077	26.538
Mcoln2	39.8247	32.8061	125.829	279.645	298.718	494.432	158.395	244.058	355.588	690.873	861.766	1052.47	35.3979	56.7133	55.0768	72.631	52.918	60.5235	62.825	23.3033	278.872	218.627	241.921	871.188	269.153
Ear11	10.8901	32.3142	15.2035	10.8812	9.85967	10.5747	13.1111	12.2268	11.8571	12.2448	13.8778	106.454	10.9239	12.6716	10.2863	11.4443	12.5439	10.8938	11.1902	19.0252	11.1708	11.9414	12.198	984.118	913.003
Fcrla	28.7139	32.2386	51.6035	1105.31	1236.51	539.14	24.6754	24.2644	21.57	23.6093	21.9542	22.5199	24.2423	25.6069	20.6781	18.5971	22.762	21.5134	20.8311	24.6332	22.0817	54.2166	22.2561	20.4121	20.5716
Gm4951	20.4118	32.1594	19.774	20.1491	28.3946	21.0162	24.9393	48.0965	38.1	118.576	3474.14	291.412	66.4298	63.5706	40.5568	45.9049	39.9659	20.6672	21.6413	21.7623	18.4374	26.8264	26.8771	1701.24	69.941
Pax5	27.4395	32.1347	28.786	400.51	223.984	29.1786	34.2572	33.1167	30.4025	25.9673	35.0407	28.9282	26.8441	30.9565	33.695	33.5798	28.1543	26.2385	28.6313	31.608	32.6644	30.335	26.7104	35.8927	30.7277
Il27ra	159.101	32.1047	34.591	475.788	603.077	23.0271	183.513	1016.88	874.525	43.2476	35.2327	55.3674	650.92	1133.83	1041.4	1191.57	288.19	991.825	430.364	41.945	428.995	458.293	355.526	33.3352	41.927
Il4	593.641	31.9213	1117.03	29.7077	29.9198	36.8793	29.1849	23.2697	22.8662	24.7849	34.3053	26.2697	34.0786	42.3969	29.7181	419.764	26.8365	28.6661	1029.33	30.5222	31.9467	25.4431	26.0097	30.7203	31.6802
Slc16a5	27.9146	31.8778	28.3448	34.0562	23.0865	178.004	50.0719	346.93	200.946	32.5584	32.0218	31.899	40.5737	135.606	543.91	146.267	34.605	31.5673	29.7494	32.2655	37.9868	40.4095	34.3	28.8455	29.1421
Ccr7	20.2812	31.8125	35.2097	404.428	494.313	25.875	1981.4	2893.96	1603.21	20.7183	74.1406	24.0003	1667.62	704.184	3662.58	402.458	1571.89	2227.27	39.1496	34.6813	20.0238	48.7132	40.2034	3992.82	3159.78
Cd96	1068	31.4382	28.669	34.9655	38.3741	38.6324	350.418	1490.2	1167.51	28.985	31.0716	29.4555	1177.27	2179.61	1235.2	730.909	248.443	1560.54	233.775	35.9842	5827.02	1075.41	972.064	32.7702	31.8456
Ceacam15	52.8106	31.2963	37.0305	53.8434	64.8372	42.279	70.7136	55.961	49.8529	36.391	45.2119	38.7814	58.064	41.6603	44.9488	42.6908	45.7956	43.2699	42.4198	41.3312	44.3906	33.7639	39.7527	421.576	609.111
Gimap1	551.204	31.2759	138.16	724.567	661.621	363.097	777.727	1797.93	1360.08	21.0674	20.0985	21.7359	994.203	1675.14	2562.95	2614.34	544.077	1609.39	1277.23	19.888	1872.62	1684.77	1038.08	26.3727	38.9141
Cxcl9	21.1319	31.1833	20.265	27.6278	31.3638	26.2966	27.1438	32.5535	35.4149	29.1343	4137.43	26.9595	23.0281	24.9679	23.6584	25.4659	25.1703	26.7928	24.0898	38.5114	23.8593	31.6026	31.4227	1018.03	25.9701
B3gnt5	17.4555	30.7363	23.9399	799.534	1172.15	19.1832	55.9455	110.533	174.098	22.4617	17.6068	19.7405	43.5388	44.7888	47.8733	71.4616	25.3341	45.0151	17.1217	24.8356	22.5532	259.69	75.5615	62.7374	30.8981
Epx	13.4529	30.5501	19073.7	25.0151	18.4662	17.2323	16.28	17.4818	24.3534	18.6279	16.9793	20.9385	20.5747	25.4764	18.6132	15.7249	19.1216	17.0333	16.4057	17.6541	19.5383	28.3208	20.4085	225.846	214.222
F7	27.9582	30.5289	154.603	28.1919	40.4458	25.2936	30.7614	34.6161	30.0076	315.806	325.49	547.5	29.0163	22.1437	31.3177	26.2127	28.5394	24.3762	27.7749	47.484	35.6926	24.0287	24.267	2118.88	2224.92
Prss30	30.3244	30.4024	29.8199	28.3711	28.3487	37.3355	55.3866	57.4304	59.6758	29.6311	27.128	30.8296	28.1522	36.2783	26.2816	31.905	40.2136	81.591	31.5	32.4978	38.8346	31.9433	38.757	34.7847	37.3378
Ninj2	24.3174	30.2204	29.3351	37.9253	41.1903	37.3846	52.0203	67.5784	54.3172	27.6583	27.3564	27.7008	57.6655	37.4393	48.7063	48.6491	65.2686	91.9824	47.363	28.2139	33.1128	22.7478	31.8999	34.1326	31.5505
Ell3	30.9296	30.1904	28.5436	848.525	691.437	29.6327	28.5879	30.3894	29.723	28.8633	35.3263	28.3885	29.8462	31.7299	30.1443	30.6816	33.6227	31.8599	28.5179	30.8839	35.3486	38.1241	31.6779	39.6182	27.1328
Il7r	57.4977	30.1844	363.001	29.9633	28.2791	20.4365	601.793	4855.2	4923.62	1902.52	747.847	1294.23	268.883	3168.62	3361.58	440.109	363.196	4791.52	1853.23	25.5345	27.6687	786.577	144.892	1740.99	941.57
Alpi	25.173	30.1055	26.307	35.4762	32.142	30.2006	29.3044	32.6838	32.1938	28.1861	35.21	27.1552	30.4354	21.8094	36.677	34.1824	32.7193	30.4135	29.487	34.5888	631.106	24.6354	24.0962	42.0981	37.6276
Pbx4	72.9285	30.0956	38.6762	22.1981	20.5526	25.2724	34.5463	31.5779	39.068	36.9146	41.028	32.7105	37.1797	52.7563	38.8866	45.8375	28.0799	66.1292	39.1427	37.6741	29.6489	23.8794	24.8095	20.7286	21.043
Lef1	28.1855	30.0317	25.7075	28.5986	52.3002	42.2585	366.284	2184.85	1151.03	27.8917	26.778	33.1507	788.3	271.889	2453.42	474.502	448.288	2571.22	538.503	33.1408	44.0534	238.722	188.182	29.2192	28.745
F10	22.9216	29.9629	484.973	18.9082	19.4623	19.13	19.692	21.6904	20.3782	117.146	379.532	346.962	18.9618	28.3675	22.1629	20.2843	22.3249	24.1104	23.2199	327.917	19.0683	20.4734	22.5608	2073.96	1071.25
Spo11	27.3001	29.5985	19.8243	21.1929	22.9784	52.145	30.2136	83.3379	118.039	19.6733	22.1202	20.2465	27.6355	71.4227	70.0129	108.241	21.8504	184.266	24.3884	21.1266	33.1743	155.051	52.2646	24.3962	29.2855
Icos	29.4206	29.5981	26.5655	30.2243	29.411	28.9776	326.545	254.862	256.835	27.9157	30.0886	29.4801	1118.15	2218.29	349.435	4084.02	990.447	1215.27	2022.53	30.2148	38.406	151.745	211.353	53.7557	45.7513
Il1a	34.3917	29.3034	220.155	20.9681	27.1372	22.104	36.8533	20.9262	23.3726	50.5874	1079.56	36.7429	48.4744	18.6033	18.2274	20.8076	358.25	47.2054	21.4489	21.8774	22.6548	24.1401	23.7933	7186.4	421.707
Cd8a	24.9926	29.2567	23.3042	27.0185	25.4172	26.9645	736.245	2734.08	1980.68	24.8887	24.2629	24.9418	30.4256	30.0847	25.592	24.3512	42.9385	22.9274	24.5638	27.8003	8032.29	24.6684	24.3581	26.0142	29.4473
Ccl22	38.7744	29.1847	40.6195	27.7697	22.679	35.3861	35.3791	32.4921	36.6408	33.7743	47.0645	36.6599	37.9822	30.5135	34.5502	32.5351	42.7558	54.8173	39.1308	26.2795	29.9758	27.2826	32.2756	6268.36	3645.44
Grap	21.3755	29.1775	45.1096	107.255	133.739	51.1288	314.432	432.133	344.746	55.5371	80.8065	60.1572	514.862	503.549	770.342	616.5	434.397	683.889	619.942	23.3041	86.4385	211.994	122.921	22.6946	22.7615
C3ar1	196.373	29.072	1532.23	31.5925	28.6156	24.5686	20.5432	25.395	24.1178	4230.89	4123.12	4553.54	21.6019	21.4223	25.7846	23.7503	23.5527	22.9291	21.9292	30.4496	25.7419	25.1478	21.6237	984.057	752.87
Lif	99.8444	29.0377	30.4411	32.1642	37.4776	27.0588	82.4797	29.4074	30.1651	33.3117	38.5801	32.7142	64.7209	37.2679	31.6006	42.5223	104.407	91.4838	169.859	31.2601	30.0756	33.0431	36.8679	40.4965	29.3365
Tnfrsf9	376.028	28.9511	65.6704	29.2107	25.3833	22.5696	1273.46	42.1487	48.9013	28.8717	30.2091	27.9194	851.128	119.919	48.2828	373.576	2099.43	353.271	1476.62	19.6406	544.851	166.471	1059.1	2346.01	1192.14
Klrd1	14.6247	28.8619	178.8	13.2762	14.0902	16.5992	1747.05	5353.65	8238.11	12.3758	12.3963	12.0212	77.0253	132.646	480.369	26.2727	907.981	1272.6	51.3618	62.0303	8832.13	10289.7	7656.36	22.5177	70.8848
Csf2	33.1931	28.6228	41.5119	31.2813	28.8151	34.2738	2551.09	25.9011	115.648	26.8203	32.0723	29.9634	58.5407	28.1661	32.1533	26.7219	456.536	70.0246	113.731	33.161	87.6153	88.3414	89.2657	31.3026	27.3016
Scn11a	27.9257	28.5859	29.4959	38.394	40.9743	214.395	31.4559	32.8019	33.6032	26.6005	31.355	27.0729	41.0024	34.1991	35.7311	39.2478	29.9941	45.6865	34.8096	37.83	44.4108	30.5809	33.0246	48.5166	37.3192
Fcer1a	16367.9	28.3215	1912.38	25.2168	15.2406	16.453	15.0662	15.6296	14.373	15.2886	13.2863	14.5578	14.3547	17.3103	13.9449	15.9664	17.8518	17.9601	15.8945	16.7671	15.8912	15.5551	15.8898	18.1048	20.1907
Hpgds	273.87	28.1919	57.6452	28.5889	43.9046	26.1061	23.5019	31.67	40.2981	1468.33	469.379	500.354	28.0993	23.7957	33.3441	36.3975	26.2499	28.9951	96.1807	24.6235	49.14	23.2117	23.1721	30.2799	36.9879
Art2b	31.4832	28.0735	25.745	29.4645	26.1668	26.8763	38.1272	580.446	198.357	30.4172	30.3819	33.9841	167.944	230.336	368.375	635.962	24.7861	66.3023	34.8976	34.4102	289.446	28.1765	31.8074	24.6975	25.5154
Cd160	22.5708	27.4907	21.4376	27.1893	26.231	25.3742	163.353	102.152	338.419	23.6782	24.2081	24.5064	49.3182	56.1829	45.2763	104.103	41.721	29.1979	29.3962	23.4443	1660.18	303.293	172.09	20.2142	21.9562
Tnfrsf8	23.4542	27.2708	27.2816	30.2577	31.8518	27.7271	34.8	28.2608	25.4781	32.1845	29.3739	29.0601	32.0778	23.2949	27.2361	27.8477	303.411	87.5708	70.8734	31.9086	28.916	27.398	26.963	29.9212	27.8906
Il24	26.4701	27.1091	22.2761	32.8758	26.4191	48.1816	40.9932	33.399	26.9596	29.603	22.0442	27.5634	41.2845	34.1158	28.5543	26.5838	121.779	84.421	341.018	30.865	35.1282	23.5159	23.2922	38.4639	36.4514
Spink2	845.73	27.1009	31.5073	21.6509	19.9875	33.2561	39.2686	29.8961	30.8698	28.4606	40.7023	31.3012	37.7703	26.0994	32.7171	36.2088	49.832	46.2519	44.0443	55.3	25.7455	20.7635	25.6294	363.565	417.354
Ms4a8a	17.3042	26.9928	21.8553	15.0538	20.9777	20.1974	25.0332	19.6682	21.0558	23.3853	32.8056	28.8216	20.5709	20.7327	19.6489	19.8969	22.524	20.4587	18.816	531.964	85.2235	26.0981	19.1828	52.8284	53.1832
Pdcd1lg2	138.016	26.959	103.903	217.762	39.223	25.0066	233.867	27.1449	55.6943	23.5273	132.955	519.785	354.241	69.5208	37.7199	308.589	716.389	64.3003	198.977	34.4622	92.6709	47.2829	59.8092	769.992	478.235
Xcl1	41.4991	26.9007	30.4902	22.5719	33.8654	23.5928	6588.56	121.278	1565.24	25.0428	23.6258	24.216	156.548	56.7775	53.732	80.9939	3345.71	31.3697	29.6749	19.8701	2550.48	565.651	954.287	18.4942	20.5412
Zg16	28.8959	26.8659	27.065	22.768	21.1931	21.2869	28.2803	29.3603	26.3232	30.5368	34.6554	32.0219	25.9425	40.0334	27.7724	27.395	29.9242	29.6985	28.5304	29.0544	1830.36	28.6988	29.7217	27.6477	24.8188
Capn3	75.8486	26.8125	25.5513	24.9529	21.1131	29.3901	32.008	41.4488	46.6903	24.3655	23.5223	23.1215	369.688	118.545	65.5738	127.548	34.2181	132.48	30.9533	34.9791	2221.55	50.4738	54.3726	26.8711	27.5143
Slamf7	21.9381	26.4153	66.5323	216.917	355.88	2722.4	228.065	45.558	169.189	365.287	2208.01	255.147	35.1375	77.3718	35.7292	49.9046	101.24	38.1139	32.0968	68.6	279.142	216.519	150.048	1439.65	177.428
Aicda	26.4527	26.3536	26.2508	645.076	23.1272	28.944	22.4912	23.6192	26.7456	22.7249	30.1924	24.5407	26.8744	34.7675	29.0652	31.6242	39.8872	26.3728	26.1618	30.0498	25.7384	27.3291	27.6391	26.0048	23.5014
Marco	24.0917	26.2766	27.458	20.8537	22.9336	26.7137	25.5386	28.465	30.1112	88.3234	4192.33	72.3806	26.5087	44.932	26.335	23.9823	30.5381	23.9452	23.7893	22.3564	22.983	32.6405	28.5094	1144.94	172.587
AI607873	11.2107	26.1244	61.784	12.026	14.2003	13.4621	9.51388	11.0669	13.2666	275.107	681.32	87.2531	9.98463	11.7711	10.2701	9.80604	9.89729	11.3265	10.9664	1425.37	9.39729	10.745	11.2659	1787.93	341.397
Poln	629.05	26.1091	92.0157	59.708	42.3539	45.5045	36.6145	39.6838	43.8928	26.1108	22.8788	20.2682	39.9753	20.4933	28.0046	25.4043	22.9982	26.7347	27.3389	22.2442	27.9644	30.8459	25.3078	24.62	23.1994
Zfp566	28.701	26.0412	29.7496	604.333	609.718	275.99	156.271	225.468	187.929	50.3323	21.4401	39.9837	88.3398	166.575	170.935	83.0444	70.9973	63.5591	59.173	35.6814	71.3128	113.438	71.9685	16.1971	24.3446
Eif2ak4	100.585	25.9076	101.018	658.922	805.635	234.943	173.341	113.189	112.002	128.621	70.9762	126.466	84.2139	157.64	105.176	117.856	99.206	103.522	97.2611	170.043	105.642	66.784	53.093	37.931	60.1071
Ccdc62	30.3785	25.4643	17.6098	295.571	80.4631	28.1086	16.74	47.2443	58.1237	23.5212	16.6934	17.8618	33.0223	32.5982	48.2268	34.7927	15.2477	24.9135	27.5323	20.4406	21.9694	22.1935	22.1423	15.3354	17.0571
Xkrx	21.6112	25.1319	43.7378	455.149	468.411	28.2697	20.7121	137.559	30.3297	29.1283	35.7272	27.8187	36.7969	41.7992	130.954	37.3202	24.441	24.5047	24.0391	19.8041	21.6918	40.7547	31.3712	25.1211	22.8576
Rgs1	7321.01	25.1301	189.546	42.5012	24.2486	21.3495	1259.29	157.027	610.179	495.301	1074.11	241.461	2661.93	651.757	162.169	1170.1	3452.47	1079.94	4557.87	40.0587	9419.5	522.821	230.607	2510.58	418.147
Sit1	23.1128	25.076	20.3143	73.9146	92.3511	27.9554	137.024	390.138	398.085	26.0259	22.789	23.7645	409.342	794.099	916.605	521.928	72.6385	509.704	328.789	22.2409	25.2135	26.4904	23.0789	21.4099	22.3104
Cd200r4	2729.39	24.978	970.162	12.6886	15.9868	11.6123	46.5571	224.953	286.657	490.532	759.856	519.094	18.098	42.5398	82.5898	41.2879	11.6648	20.6417	162.09	13.4646	11.9003	664.03	197.263	617.387	964.217
Pga5	556.807	24.709	309.726	39.1551	31.5915	26.6139	33.7587	28.7044	29.5176	27.073	24.3938	32.2878	35.3479	35.7541	26.8383	24.5148	35.3883	33.8496	26.1248	34.5958	34.2073	32.3866	38.4369	25.7362	30.6815
Gzmk	29.6546	24.6021	20.3731	18.4451	34.7768	25.0416	38.6666	90.0517	492.075	18.8729	18.2861	20.3992	22.8577	123.62	38.5003	276.955	21.4376	17.4592	18.4891	22.8047	21.2045	51.0059	95.194	18.6055	18.6224
H2-Ob	168.342	24.4073	29.0074	2432.89	2250.12	82.4977	15.7301	401.859	230.094	15.2576	20.8519	15.0432	81.3019	93.9218	288.32	107.746	14.908	74.8588	15.1306	45.559	13.4835	100.401	18.3013	76.1163	82.3846
Asgr2	20.4429	24.4012	22.1932	32.0428	27.9206	18.4359	26.0797	35.0984	25.3053	33.8739	30.8475	26.6357	24.1406	41.7404	24.6727	24.627	21.694	23.217	23.4434	27.5617	21.0485	32.4743	29.3234	97.8079	694.294
Lyzl4	22.567	24.2245	34.6211	20.3761	34.7799	27.6733	27.1613	25.1389	26.5536	108.034	27.4841	428.324	24.612	25.9249	26.1449	22.3898	30.0412	29.0185	27.2268	22.6736	24.4116	26.9573	24.9708	30.2327	33.0933
Atp6v0d2	149.646	24.1765	424.771	25.9814	22.8789	22.2775	19.3489	20.1843	38.6802	3481.48	270.209	4778.64	27.3148	28.7277	20.3167	50.7068	28.0688	81.6279	25.2112	16.5982	20.6474	20.5382	18.8544	751.354	1231.27
Cysltr1	19.2025	24.1585	33.1002	22.475	24.7632	20.3231	36.0888	18.052	16.9799	321.694	259.644	201.915	26.2994	17.4299	17.4631	21.4553	94.7964	1005	1921.39	174.136	16.0116	20.8162	18.6193	328.68	484.231
Klk1b1	17.8141	24.0192	21.516	14.5165	16.9214	21.8927	13.8457	17.1861	15.5575	20.4265	21.1986	20.95	18.0765	21.7186	19.2101	20.9697	26.5365	19.8064	20.7335	24.7108	24.9985	21.1303	18.9758	757.474	982.196
Cd70	27.0261	23.894	21.7948	16.0448	19.2015	20.7375	181.089	22.6643	24.8854	23.8391	24.5052	21.1957	42.6458	30.1496	24.9032	31.1116	800.923	34.9323	27.1611	20.7359	24.2772	28.3639	26.5439	506.987	40.3264
Cxcr5	20.3324	23.8784	16.4347	2510.2	2414.86	19.7276	201.698	111.277	568.21	17.1872	27.7457	18.6261	228.997	805.956	30.7986	3621.17	17.4593	40.7963	16.8654	18.4644	17.5354	41.1576	22.385	33.6842	17.705
Cyp11a1	9835.13	23.8169	5862.67	40.8368	26.6117	33.1589	24.8461	21.0678	20.8026	23.6659	25.5007	20.7897	77.0628	19.1614	21.2487	23.2496	33.3101	56.967	5507.25	18.7442	22.2819	17.9215	20.3298	28.8561	30.3367
Nxpe2	23.1657	23.7195	26.7133	239.766	263.618	29.7562	23.5993	28.8429	26.4378	21.2696	25.3977	23.5321	21.6096	23.2565	24.2147	22.2747	25.6664	24.754	22.5137	26.0304	23.8011	26.0248	24.7126	22.9282	21.859
Timd2	24.3287	23.5282	20.1349	68.5938	27.4798	268.454	20.9655	21.7448	21.3165	20.8725	22.0192	21.567	25.6598	21.6862	23.1389	23.8719	102.177	127.264	22.9643	26.4598	26.2079	20.8383	19.8134	24.2155	24.6725
Tnfrsf17	16.2248	23.5171	18.197	19.205	21.5115	123.45	21.3976	19.3365	18.6398	22.6383	16.5761	22.1098	19.3395	19.1331	19.9394	18.3664	18.1846	21.9967	22.1192	20.2901	21.744	24.5596	21.6353	21.1318	21.0675
Ppp3cc	40.5802	23.4523	41.593	264.688	246.497	555.01	196.879	235.431	481.467	39.6883	32.6649	32.7073	110.562	111.961	162.227	140.371	176.759	306.249	286.891	18.4365	319.282	291.968	372.802	29.1063	25.3867
Gbp2b	22.1008	23.2821	20.1192	20.6681	28.9726	26.7218	19.6223	22.0123	19.764	28.8394	2703.4	26.4095	92.4198	133.145	25.5389	53.3401	25.6994	18.8681	25.1747	26.1289	28.3306	25.3205	22.6271	188.213	128.144
Eomes	41.0631	23.1049	22.6568	20.6902	21.5014	20.6633	1230.57	422.806	2973.82	19.3276	21.6443	20.9041	52.0643	77.8682	55.2874	72.1914	89.2929	26.5789	29.4838	19.0333	18.7713	2067.61	1827.96	19.4407	19.1039
Gimap5	116.269	22.7427	29.683	642.884	436.234	57.8311	157.656	506.048	482.654	30.0445	30.8902	34.3489	119.88	628.063	382.715	367.281	182.195	151.906	114.154	27.4893	326.464	929.463	484.292	21.5747	20.8925
2500002B13Rik	47.4578	22.5946	18.1233	12.6267	12.7466	19.8832	30.687	16.7605	21.8828	35.9515	47.5124	22.8335	22.7198	12.1156	18.1347	18.1042	16.2553	50.8379	67.5079	23.0394	13.9326	12.4097	13.0445	21.2096	17.2736
Htr2b	21.9065	22.5408	25.6406	36.7228	48.5765	31.6086	21.9606	21.9116	22.8168	299.497	109.209	226.531	25.59	26.1157	25.1913	25.5265	25.388	22.2635	23.1521	30.4196	32.2741	26.2113	25.1617	75.0316	33.1147
Il12rb2	35.4157	22.5061	37.5481	23.763	20.688	28.2774	87.1023	25.5558	28.3945	25.7368	23.6175	23.4151	27.8254	30.6293	26.8798	28.7657	707.029	92.238	25.6282	37.4485	57.5753	68.6773	65.2961	158.871	77.7135
Gm14047	289.077	22.4663	24.0042	14.3417	17.9418	13.4102	13.1552	13.3485	12.6161	12.5838	15.5829	12.3714	14.7223	15.6134	12.9126	13.3867	13.1589	11.871	13.3916	15.0565	14.5881	12.3596	13.3034	35.2925	15.3654
Catsperd	115.344	22.1146	32.962	20.101	18.0149	21.412	26.2931	25.6032	34.8476	23.9378	24.935	22.6804	35.7709	44.686	46.2581	65.6459	23.8624	107.994	198.034	22.1897	46.3063	66.6075	33.076	28.1502	28.7215
Lta	25.4407	22.1002	21.5271	83.3776	82.1371	21.5329	2321.63	143.226	102.811	20.5289	33.6624	24.2735	2195.26	184.115	239.526	204.573	3149.31	546.927	53.5391	18.2396	23.375	31.5204	81.4753	126.162	24.8816
Pglyrp3	25.757	22.0758	19.3608	102.859	55.5637	185.041	20.0482	30.0227	30.9193	17.645	28.0128	20.2559	23.3301	37.5841	39.7087	28.6393	39.5639	23.7425	17.0822	26.2381	25.0656	77.7702	47.008	22.8009	23.0658
Cd8b1	15.6813	22.0418	18.3181	18.028	16.8272	18.3492	1333.7	8644.61	6393.71	18.2313	22.8858	16.2119	112.038	31.9142	212.613	82.554	36.2948	136.571	152.441	25.86	21.795	21.5959	20.6657	19.2607	17.598
Mcpt2	364.001	21.9735	16.5583	23.5276	16.398	22.3014	14.7089	18.9513	19.3088	15.0127	13.4782	14.9003	19.667	17.2959	17.4996	18.5226	19.8437	17.6246	16.724	22.4231	27.4708	19.8368	19.9227	21.4487	21.8105
Calca	2251.32	21.865	22.9579	18.9358	19.5481	24.1594	17.4741	17.2232	17.154	18.4174	20.6307	19.6228	25.6749	20.6285	19.366	18.9424	18.2728	18.7446	245.185	22.5184	21.9301	25.524	22.9025	24.1909	23.0746
Oosp1	21.9543	21.7198	35.7984	35.3113	25.172	326.389	24.6357	25.3064	23.0623	22.5037	19.0129	24.3937	21.8798	22.458	21.7401	19.3931	21.5181	19.1903	17.9918	21.6969	24.8689	21.8431	25.2716	35.5751	34.3873
Egr2	158.844	21.679	709.536	304.315	336.703	39.7289	416.01	197.101	78.9728	433.279	21.6933	2436.32	464.174	960.483	186.299	1024.23	393.426	51.2891	105.354	21.8154	256.479	279.973	635.799	448.419	906.551
Trdc	22.1207	21.6602	68.4164	15.1293	14.8677	20.9371	49.4235	94.4186	185.907	15.8689	17.2685	21.143	60.3513	57.4432	92.9821	55.4313	1065.21	103.156	130.125	15.3894	8537.2	785.208	775.947	18.2217	17.9776
Pdcd1	19.1868	21.6292	20.6199	19.6447	19.0658	17.7715	342.382	31.7363	48.0951	17.834	23.1013	19.7797	429.915	712.266	54.5928	2935.4	1000.4	111.497	77.2391	18.4591	24.9341	19.7507	20.5129	18.385	22.9923
Cxcl11	21.5623	21.6033	19.5046	27.5259	23.2635	22.7888	21.5873	24.9013	19.9306	22.92	1561.84	20.1656	20.0044	17.8338	18.4807	20.7308	18.9918	20.6288	17.5826	17.8241	17.5829	19.5354	18.2066	184.937	16.7575
Cd5	18.989	21.5371	15.4485	20.0474	22.1904	24.4416	1148.52	1563.26	1731.72	16.727	15.771	16.9257	4242.36	5469.59	3298.97	4555.67	4933.32	3033.8	699.157	20.7094	22.2999	18.6261	17.9104	21.9649	21.7368
Gbp8	37.1098	21.5185	12.1472	757.737	163.507	36.9786	197.621	2643.6	1887.37	13.2268	1203.64	24.2831	163.467	1646.1	1237.38	923.557	120.864	802.884	1513	19.5371	1310.26	1246.75	662.487	688.097	148.374
Pkd2l2	22.4693	21.3706	21.9575	24.8922	25.9536	275.703	21.9408	22.717	21.4615	28.2222	32.0621	27.3887	24.1669	20.3436	23.7895	20.8537	22.7322	21.6886	21.0474	22.6502	23.588	21.9504	20.3967	22.0659	23.1139
Cr2	19.9671	21.3458	20.7028	1999.5	1634.62	51.1942	18.0469	19.7531	19.4746	23.2473	21.6999	24.5845	18.3968	67.1937	24.2471	21.829	20.8484	21.1253	19.0114	24.6362	18.4434	50.4996	20.4711	18.8483	18.4569
Ptger3	347.065	21.3384	37.0648	21.2545	19.084	18.9086	25.0067	18.3016	18.0545	22.8576	20.5952	18.4257	20.4951	18.8932	19.2079	15.2629	42.405	20.7178	376.079	16.4387	17.6879	18.8451	45.9613	17.7984	22.7203
Myl10	285.091	21.2389	406.491	14.98	16.9142	15.5477	18.1162	28.8385	20.7908	19.6479	16.9204	17.7265	24.9383	26.7758	87.6571	22.7895	23.506	50.9927	58.9398	18.5334	17.6518	22.6807	24.6617	23.3303	30.5661
St8sia1	25.4841	21.1031	30.8966	21.1975	22.2825	20.4559	29.7086	99.4119	42.5961	21.8728	23.8141	40.835	86.4898	42.988	160.595	78.4812	28.7774	151.954	69.0668	22.8409	20.9244	19.6439	20.8349	19.8119	19.772
6430571L13Rik	28.554	21.0879	25.205	21.1641	21.3879	20.9678	35.9982	20.2842	20.6571	22.4991	22.2818	23.5582	59.8552	25.6221	22.6956	24.8144	49.2088	70.5191	115.501	22.2463	22.3843	19.147	20.143	26.1155	24.4718
Il2	19.8401	21.0245	17.4338	18.6147	18.0624	21.9408	75.9893	18.1792	46.668	19.6467	16.9768	18.5741	84.4427	44.0234	22.5766	72.3573	4622.72	47.8784	19.7648	23.448	26.7257	30.9644	20.7275	26.4342	24.0253
Ccr8	14.6247	20.9777	19.464	16.6479	20.6534	19.614	19.8134	18.6203	19.3263	17.7142	23.0362	18.5053	384.66	37.1639	21.9637	50.4591	32.1694	89.048	518.358	20.2142	23.6149	31.5704	31.1135	30.2703	23.475
2010109A12Rik	24.5708	20.975	31.4976	18.3055	28.8237	46.0922	20.5604	32.7005	35.1125	17.6414	16.6384	16.4125	24.2101	18.9589	30.9155	27.6607	19.1671	55.1481	34.6335	15.889	16.1033	24.4432	21.6646	15.9012	16.5941
Fam167a	21.4613	20.9525	24.5998	168.789	206.196	22.523	19.3474	17.4184	19.3583	17.1747	18.5117	20.4588	22.1001	24.0955	20.1438	24.8985	18.5602	18.0536	19.9196	19.4013	21.8253	18.5387	16.8653	22.6811	23.1523
4930428O21Rik	22.6225	20.792	20.9098	20.064	22.5972	117.728	25.7124	19.3554	18.8469	20.8974	20.4523	21.4372	21.0363	25.5771	23.5265	28.311	22.1765	21.7657	25.3436	20.6268	20.8324	25.442	22.8105	20.7448	19.5449
Cd2	14.3272	20.5573	16.4375	546.903	998.33	66.1918	1503.32	3242.68	3678.56	18.9046	19.8302	19.3137	5204.05	2179.03	3785.38	5079.67	1084.64	5073.48	2924.09	30.1159	18.9728	2814.19	1324.55	12.784	15.7984
Ccr4	20.8731	20.1831	18.5567	21.2673	18.3779	21.2338	28.8109	19.901	19.9461	16.561	18.8453	19.5031	92.8719	36.9601	24.1227	78.9272	77.1542	102.907	65.4276	22.2771	23.3539	24.4795	23.0026	29.5173	25.3234
Cdkn2a	454.769	20.0368	1136.01	18.1574	25.4736	24.8733	43.7465	21.8191	21.5977	27.7471	26.8979	27.8969	21.7753	25.4735	20.8373	44.2758	61.5441	27.5947	61.3049	22.4586	26.5821	21.4869	21.3239	23.593	21.694
Ampd1	23.9264	19.9822	16.9089	24.4838	27.9337	38.4478	17.8848	178.77	32.7276	17.3729	21.1684	17.9868	35.409	22.4735	212.46	22.7491	21.1291	21.4322	24.8768	17.6031	22.7009	23.8189	23.1237	25.178	23.8212
Plau	179.226	19.9721	41.9226	17.9857	16.805	18.7271	16.7369	17.1616	16.3789	182.094	64.527	187.789	25.5444	19.0272	18.9773	18.6254	18.8638	18.2021	18.5506	19.4875	19.9244	17.5239	21.285	29.5461	29.6249
Itk	202.275	19.959	18.5723	17.2646	19.1759	15.6423	673.374	168.767	136.233	15.272	15.9712	15.8372	118.001	30.1817	172.737	113.183	416.832	216.401	331.43	15.4355	19.2037	19.5965	27.0602	14.0667	13.9517
Cd247	20.5778	19.925	19.8015	20.7408	23.7097	19.0184	153.432	257.211	252.158	20.6037	20.8993	20.2849	183.698	55.0868	423.679	277.308	55.0158	356.069	127.487	19.5567	37.5722	47.1056	37.9453	21.4436	20.1236
Gimap7	18.1698	19.8141	14.938	2588.62	1358.84	241.175	943.367	1282.38	1799.08	14.897	14.9481	17.1892	572.946	1661.18	1099.27	2421.13	247.116	1560.08	793.735	18.6664	6603.73	978.777	574.541	19.1289	18.9866
Reg3b	18.7881	19.7327	18.6816	20.8758	19.6939	18.3804	24.7668	21.5887	20.3083	20.6383	17.7223	22.1007	20.7224	18.6024	20.3357	21.3699	19.5468	19.6326	19.1674	21.2344	397.343	18.1406	18.1975	25.3334	22.2911
Themis	23.166	19.6984	18.3924	21.1457	21.9868	19.8242	287.643	182.796	190.291	22.0108	22.136	22.892	63.5315	76.3454	150.455	141.268	270.887	691.41	419.786	20.2781	58.8726	24.5062	20.3669	18.7321	19.317
Gm11110	115.343	19.5733	62.6329	87.2027	47.5298	25.8895	78.7688	68.8704	83.7806	24.8835	99.8129	20.7771	138.263	102.828	119.648	182.487	50.5314	354.335	246.139	30.4045	79.4128	53.1607	103.867	86.5478	88.0092
Mcoln3	21.2164	19.4244	21.8	22.9323	26.6165	27.893	24.6952	51.0555	35.1528	126.422	20.1719	103.932	49.6967	22.7097	53.4867	41.5348	17.7327	23.1576	18.7105	17.7059	51.6862	21.709	19.7494	24.8653	28.6752
Ncr1	25.0267	19.3839	17.5216	17.2964	16.967	18.03	17.7478	19.8316	21.554	16.5781	16.4335	17.5848	21.9545	17.5522	16.2742	18.2194	14.0833	16.24	16.6306	18.9231	17.2014	846.871	689.494	16.1337	15.7515
Mx1	23.1532	19.2902	20.0598	81.9158	90.9961	54.515	68.2451	81.253	342.067	149.148	5707.68	47.4546	49.2702	134.345	42.9923	149.531	39.9059	32.5733	93.7372	596.497	17.7035	51.214	30.303	4189.48	674.888
Cacna1s	22.9274	19.2523	19.6467	55.5456	16.1892	339.517	53.937	27.8546	25.559	18.7572	20.3627	20.1168	33.5699	21.9691	19.429	108.688	56.5675	40.5575	21.9183	19.8061	17.6239	24.1347	20.4203	20.732	20.1725
Cd27	16.3393	19.238	15.3362	13.8829	16.3254	14.6103	424.032	1208.23	1665.93	16.4746	17.2138	16.0493	559.988	796.312	1222.81	1567.7	214.376	389.461	202.609	12.8677	434.861	184.994	110.127	12.4383	13.2067
Mylk3	76.7156	19.1987	369.264	22.802	25.5797	20.1876	14.9521	16.6255	17.4911	19.121	21.7527	18.3679	18.9792	18.09	16.4233	16.9044	16.6892	16.2665	16.9764	19.0278	16.8912	16.5021	17.4293	20.3885	20.2417
Tbx21	14.3605	19.1121	16.5839	59.641	67.407	21.6335	1142.61	154.011	2456.19	15.1149	15.8596	15.2308	149.877	585.369	70.365	326.412	1185.37	20.1514	17.1545	13.3073	786.794	2215.34	1006.74	15.6235	16.3019
Ccr9	16.1306	19.013	61.1392	17.1145	19.9405	22.5562	17.7667	487.527	28.7547	17.8269	18.7824	18.0296	41.0523	26.2112	49.1898	38.3796	17.7623	16.1982	15.2858	19.5503	558.194	16.9957	15.7918	20.1207	24.0144
Ms4a2	3228.4	18.9598	559.363	34.7234	23.8133	19.4592	14.9786	14.4706	14.1515	14.2039	16.565	15.0062	15.3846	15.5452	14.7398	15.4634	14.8848	15.4463	15.3961	16.966	15.7071	15.4536	15.1881	17.4628	17.4751
Crtam	60.5034	18.8563	20.6629	28.0201	27.0224	18.8825	2172.21	684.066	970.391	24.2475	26.8059	22.2874	54.5508	105.68	136.02	97.9549	819.364	37.7841	24.5737	24.1035	994.888	612.972	629.53	20.3823	17.42
Ctla4	25.513	18.8534	19.781	21.535	27.5207	78.9965	579.108	70.481	51.8173	20.2537	27.8112	22.5805	1622.95	1188.52	113.805	2825.08	1075.68	4313.88	387.607	21.0525	43.6135	30.2428	25.2065	21.2691	20.586
Mmp13	11.604	18.8513	494.745	13.217	11.7045	12.8457	10.6821	10.7785	10.7802	226.21	1370.83	557.828	10.6781	9.68844	10.7041	11.0923	9.27551	14.7496	22.0946	8.26245	10.2683	10.7345	10.379	3681.28	715.292
Trav12-3	24.9236	18.7858	21.4669	21.1486	15.904	17.3026	34.3696	63.5062	46.5401	18.8958	20.7232	21.1484	43.2879	16.042	142.91	168.752	32.5742	179.451	142.357	21.1158	20.0993	24.3651	27.3908	17.4692	18.0455
Fasl	19.5199	18.7073	14.9772	15.0157	16.0293	17.8432	782.823	31.0827	358.838	14.505	16.7185	14.8579	71.9219	81.0071	87.3635	58.1262	330.577	30.6498	38.1805	15.863	2561.18	675.893	885.985	16.2875	16.8592
Tph1	11616.6	18.6563	18.9892	17.679	14.201	19.6632	18.1979	20.3481	20.7405	15.4649	19.6121	18.157	24.1454	21.5954	22.377	17.4982	29.0198	19.9446	23.5943	24.102	26.7955	20.2883	22.323	21.6572	20.6421
Bex6	13.2636	18.5788	24.4231	11.6179	10.194	10.8746	10.7702	11.1692	11.6136	12.7094	11.3591	15.0904	10.3852	10.5802	10.8096	9.98915	10.7588	11.2671	9.96725	186.992	10.1148	12.6193	10.4122	14.0828	19.4106
Reg1	24.2132	18.5728	19.3167	20.6871	21.9041	19.9415	16.7318	21.5035	17.6272	20.6672	22.7719	20.015	20.7083	24.3493	20.0555	19.142	21.8686	21.2586	21.7619	22.9185	708.129	20.4261	17.0569	21.6194	23.7512
Spef2	17.9923	18.5463	19.108	19.4575	16.0773	21.0098	32.2347	31.8856	43.1201	21.0046	16.5457	18.7747	22.5539	22.9118	38.5729	19.5599	23.3743	61.5444	43.4759	17.9202	17.2489	21.0569	20.8043	17.7073	18.1
Apoc3	23.5731	18.5371	27.0942	28.9778	27.4454	25.1476	24.8723	28.9749	32.7293	26.3264	22.1581	23.8612	23.4157	26.2939	25.1826	28.3677	28.2629	26.3678	26.2713	21.1915	805.446	23.6717	29.8213	20.5017	21.514
Il5ra	21.4215	18.5362	265.882	18.2558	43.0736	15.0465	17.799	20.2421	18.0154	15.7423	14.9089	14.92	15.7751	15.5779	17.6265	16.3388	16.3001	14.3935	18.3214	16.1918	15.481	17.5283	15.4742	17.4147	16.3754
Abcc2	20.9512	18.4638	337.954	20.3598	21.9058	16.7567	22.9466	21.4255	20.0159	24.7636	21.973	22.4785	18.7092	16.7716	18.6791	21.6188	17.878	17.4785	19.4642	25.5483	25.5263	18.7946	18.4548	20.6081	20.3866
Skap1	148.335	18.4628	18.1019	18.4341	16.1158	17.4181	420.013	2012.36	2125.45	17.9342	19.207	18.9483	1276.55	1281.54	2496.42	2158.56	280.229	2897.52	3375.12	17.1105	1258.24	1147.6	1718.7	15.7803	15.2543
Lipn	13.4703	18.401	20.392	12.2449	11.2323	14.6574	15.5907	13.2749	15.3936	74.9194	112.706	564.369	12.7524	12.6658	13.381	16.5525	13.787	12.9702	13.5199	13.0895	13.1442	11.6987	14.1887	23.2947	23.8497
Trbj2-2	20.77	18.2574	23.2003	29.6119	23.0489	23.7129	365.765	867.248	649.455	26.1575	28.3369	29.3885	658.526	335.017	1520.36	1396.54	211.827	970.147	618.009	20.8856	372.163	27.2008	33.3329	25.9439	24.5025
A630023P12Rik	17.7462	18.2241	18.5776	147.467	58.3354	21.0001	25.76	271.769	269.809	18.9693	19.0625	15.6209	441.395	1928.07	935.95	1081.24	32.7524	1545.56	282.622	18.8214	22.0937	21.4739	20.7236	16.1692	16.2224
Cdh17	18.7368	18.1104	308.104	373.152	69.3783	49.8011	14.1451	18.715	17.6147	15.2165	16.877	14.0241	20.7043	15.5984	18.3699	21.1316	29.9859	72.0764	83.3099	21.5676	204.139	27.5517	22.6066	36.5101	34.4735
Il12b	16.8283	18.0736	16.9449	19.8907	18.8974	19.26	16.8269	20.6176	19.1682	17.8304	666.999	18.0756	18.3936	15.8682	16.9234	17.7247	14.7564	17.4243	18.0451	14.7378	16.3005	17.0228	17.784	6556.84	75.9312
Klre1	17.3558	18.044	19.6697	16.4347	14.5748	14.0015	320.511	48.6057	989.697	19.1267	17.4621	16.6966	19.8397	22.5996	26.307	19.5253	37.5328	18.9297	14.9201	18.4954	23.7698	3241.21	1949.37	16.1126	18.0153
Pglyrp2	13.3245	17.9758	21.2112	108.356	86.1505	15.5564	79.2466	354.164	519.747	15.868	17.6351	15.1907	262.498	426.985	534.038	363.263	28.9064	614.354	1284.68	14.5314	398.654	551.78	368.642	15.9265	15.2611
Foxp3	18.8109	17.9751	15.3011	21.3739	31.7296	23.3662	14.8134	20.1541	18.1918	20.8288	18.2997	18.7847	1241.5	724.386	51.786	305.75	16.6326	20.8321	21.6837	18.5279	18.4321	17.3938	17.3006	19.9975	19.3591
Il2ra	33.4346	17.947	15.4397	18.5203	17.7034	18.8726	820.969	16.9732	19.7556	17.4141	18.879	15.9094	1371.39	59.749	35.778	60.0523	3404.64	779.473	2921.62	14.3489	17.1666	18.2791	28.2575	313.75	45.3077
Txk	314.073	17.585	27.7157	19.2247	28.4236	17.2603	327.006	655.944	599.366	18.4812	20.5641	18.8522	305.722	156.715	909.635	157.476	24.8061	297.281	34.9883	17.4342	2114.3	1362.43	1758.62	19.8021	20.2171
Ccl12	22.9718	17.4439	44.3429	14.8778	15.7391	13.8542	15.0067	14.2936	15.3599	28.6737	4231.92	105.389	14.8653	14.7916	15.9459	15.8306	16.0197	17.6064	13.6149	13.9738	14.7663	18.0378	17.4038	870.94	28.5022
Tnfsf4	91.6508	17.3661	37.0859	25.7636	29.1324	19.4423	276.404	27.0457	36.5821	19.2463	52.6505	17.8411	74.5432	29.4429	23.9878	33.1351	625.374	124.242	30.7161	23.0499	25.7833	24.354	30.1034	735.458	253.987
S1pr5	15.2188	17.3273	15.8028	16.9621	15.6688	16.0477	19.7419	31.6606	303.206	15.5318	16.0323	15.8294	17.8573	120.453	47.0278	16.3117	18.3636	16.8362	16.7793	769.321	15.9734	3529.36	501.247	14.563	14.8838
Gpr34	536.303	17.2288	438.912	139.973	15.1116	13.8902	38.6108	240.832	36.2727	120.585	9.83277	33.8644	65.5545	17.1104	135.405	23.225	18.5178	63.0258	216.968	11.9844	1380.7	18.2471	53.0206	13.2611	65.1431
Gm5547	201.839	16.9843	40.9611	50.6288	22.9411	554.057	50.3765	353.104	440.789	85.941	27.7325	50.8955	67.124	94.6743	203.665	288.675	22.3608	365.848	287.342	219.234	156.728	260.001	94.1264	18.5054	37.5797
4930426D05Rik	15.5226	16.8542	14.9983	831.111	491.605	18.2109	14.3275	15.4577	19.5225	16.6914	15.7607	16.8529	14.8315	15.5197	15.8561	17.1686	16.8111	16.3113	14.4372	16.7988	17.3082	26.7658	15.9078	16.7465	16.7066
Clnk	346.398	16.8064	18.0618	21.0729	23.6966	17.8445	20.6151	15.8799	36.3843	18.2934	13.8466	16.9488	21.5709	17.6393	18.3087	18.1419	19.046	17.666	23.2243	18.2538	863.133	539.849	1061.17	18.5783	18.4149
Nlrc3	93.9133	16.6838	16.8831	373.576	232.754	15.4076	116.253	790.528	714.235	40.743	19.9675	28.1902	188.496	1029.78	471.093	319.465	58.0657	292.572	277.057	16.7043	436.569	619.268	488.776	12.9857	14.0888
Trbv14	19.4874	16.6305	17.0695	21.3286	19.5514	15.9356	273.579	899.657	636.815	15.0982	17.2944	14.875	214.195	58.3548	602.125	408.53	66.6515	498.448	293.666	19.1239	20.1594	17.0405	16.9656	17.0581	17.5472
Cyp3a11	16.8966	16.5537	14.4133	20.9478	25.0163	24.8557	11.97	14.7847	13.7557	16.859	14.6887	17.3238	18.0919	14.7824	16.0345	15.7201	15.94	16.3852	12.4996	18.2368	1037.27	12.565	14.0973	43.4344	32.7571
P2ry14	1368.93	16.5101	2670.2	17.0832	15.479	50.9004	22.324	18.6398	19.5853	417.346	1220.85	261.605	20.4575	17.0882	34.0526	16.9856	95.3618	42.3981	541.595	19.2032	14.7362	215.44	1596.22	3097.02	1024.77
Khdc1b	13.0719	16.3965	14.1726	30.5334	17.0134	24.1115	26.8012	15.8133	15.6322	16.9665	11.2789	13.3746	15.4357	17.7601	20.7834	21.0571	14.7245	19.7731	12.047	20.8392	21.9727	1364.82	511.402	31.6354	24.6266
Trat1	15.9916	16.1421	17.3686	16.5491	14.8601	16.385	17.297	98.5878	44.5456	16.1336	14.6287	16.2876	129.184	235.666	597.118	215.989	18.8851	102.475	167.915	13.6479	93.4079	19.8742	16.3666	14.7191	15.3836
Pth	16.4562	16.0823	14.6177	14.8504	13.8316	16.9547	14.1735	14.7941	14.4886	17.3761	15.8064	14.8818	15.6134	11.6998	12.8526	13.9983	16.0633	15.0348	1662.63	14.8415	15.4413	13.0107	13.8758	15.4326	14.5368
Kynu	16.686	16.0716	24.5318	370.438	250.818	17.3504	18.9037	18.1152	16.9535	24.8338	384.929	37.5522	31.5509	15.5415	17.3337	16.8468	15.3407	16.2692	13.7374	31.3143	15.1341	16.4617	14.8447	397.317	305.424
Gpr171	878.083	16.0689	124.267	202.635	248.01	80.502	1044.95	713.729	824.248	12.5536	12.9182	12.2421	174.986	181.496	654.754	471.211	1379.71	1343.36	1652.84	13.8694	2390.75	861.773	1585.02	153.71	202.88
Cd28	17.8577	16.0108	66.3193	14.307	14.6079	746.566	782.501	901.941	1782.79	713.247	15.5426	399.581	894.929	2617.99	1550.53	2959.55	904.185	2569.61	1439.23	16.1993	15.8555	345.827	363.204	25.3768	98.9018
Havcr2	2038.35	15.9163	124.529	18.9183	16.1761	16.0639	112.606	20.2269	19.8947	116.484	51.6241	162.099	35.4492	25.3862	18.4011	22.4393	259.255	24.6984	51.7648	220.693	17.3352	16.0951	17.7414	18.6655	25.7319
Lax1	13.2102	15.9083	13.3982	28.0288	21.6247	34.8269	29.1621	129.788	368.481	13.5667	14.4438	14.3741	77.8217	73.2907	81.0043	239.052	18.6068	76.7977	28.2812	11.4314	74.1799	188.38	182.815	12.3658	12.401
Fabp1	15.9526	15.7735	15.6494	12.6572	14.3078	13.9317	16.5751	15.9998	16.9449	13.2813	15.3951	14.5678	15.1339	15.2411	14.8394	15.5475	16.1495	16.9625	16.7629	15.2986	1025.13	15.0102	15.8248	15.442	15.874
Dppa3	20.4503	15.7105	34.3132	13.7844	17.1504	13.5556	16.0962	16.547	16.9284	94.3799	71.083	56.2851	20.1661	15.6394	17.1086	20.1619	16.0998	18.755	19.785	17.8871	13.8007	26.527	19.9488	16.1839	22.6372
Il10	13.7074	15.7056	17.0282	15.2045	12.768	20.1931	22.5323	17.5497	15.8929	29.9509	228.249	34.556	35.1586	15.7719	14.7347	132.615	130.569	26.1826	2249.24	12.3242	15.0684	13.4803	11.8747	194.46	14.6721
Klk1b11	16.2727	15.5661	85.3932	12.6918	13.0011	13.1125	16.0129	18.564	17.3729	23.6975	19.1645	24.1587	17.4726	37.9355	21.9523	27.7612	17.4696	19.2254	17.2048	16.1785	18.982	18.6706	15.8628	2018.2	3311.11
Il5	18.2388	15.4115	16.5295	15.5103	15.7299	16.312	15.045	15.1425	14.9227	15.3456	14.126	14.304	14.5693	15.47	16.3433	14.9019	14.1505	17.2914	1148.94	15.2294	15.7854	16.075	14.7395	15.2913	15.6366
Klra7	12.225	15.302	12.121	12.5418	12.28	12.3356	849.684	30.7372	2321.2	12.1091	11.988	11.9602	15.3073	10.9737	11.7263	13.144	59.0229	11.3827	11.962	13.3026	12.1018	5190.74	4402.14	13.4703	12.4225
1810073O08Rik	18.9506	15.0526	16.681	21.5072	23.6366	18.0471	23.8396	18.7169	17.9696	19.5389	17.3605	18.1518	31.5746	14.9325	17.7627	25.5182	14.9442	47.821	18.9243	14.3021	14.2217	14.3367	14.777	16.9644	21.0475
Trbv29	13.6168	14.9709	15.8347	14.2287	14.4596	12.9851	226.544	630.698	397.39	13.632	15.0388	15.3725	94.4076	46.833	244.047	222.927	39.3729	321.895	91.743	13.3121	39.4302	15.7599	15.4814	12.1965	12.9329
Art2a-ps	15.4121	14.8379	13.4386	15.9065	13.0744	14.066	13.1945	13.1542	14.4219	17.8324	15.411	17.0819	26.609	18.1941	19.9363	392.41	13.52	14.3173	17.2274	14.7017	764.074	12.8877	12.9279	14.7228	16.2906
Gm8369	13.3158	14.7538	9.83076	828.126	1606.52	15.7483	410.2	631.874	536.036	17.1394	69.617	13.4942	178.794	357.975	353.274	709.232	251.741	165.728	39.6997	46.5861	11.5126	71.7072	24.4012	20.0119	11.4194
Klra5	15.4684	14.6291	14.4384	19.8571	29.9696	23.8023	64.9435	14.8921	117.271	16.1691	15.7992	17.8817	16.8967	13.2416	15.3801	14.885	268.57	14.9206	23.1147	15.9082	5275.05	183.355	187.491	20.3431	19.2712
Il3	25.7144	14.6218	13.106	14.3376	15.3558	16.6787	569.905	13.2682	13.8859	12.1747	11.5196	12.7356	23.3314	14.9138	14.6256	13.2909	1835.83	13.2295	11.7966	13.0637	15.0636	13.8257	16.0612	14.591	13.7047
F9	14.7968	14.4077	15.6961	37.9285	45.2333	163.527	13.9866	14.616	15.979	27.639	20.8879	22.1551	16.0845	14.815	16.0505	15.0937	18.0109	14.2462	12.8944	18.1668	17.0603	17.6996	15.2666	37.5725	34.3428
Ifng	14.335	14.2587	14.7759	16.8088	24.3177	18.03	15223.8	34.194	288.994	14.3161	16.5059	13.9628	54.1637	386.09	48.1467	701.148	11465.4	85.0933	19.6729	12.9795	27.7805	2741.34	1322.97	13.0107	12.4983
Tnfsf11	14.4608	14.247	15.1818	17.2431	17.9335	14.794	585.537	17.2503	24.3807	15.2262	14.9311	15.311	358.974	191.997	43.2748	983.966	1480.58	143.53	101.509	12.0127	12.6312	15.7275	29.6839	13.0233	13.4851
Ddx43	30.2462	14.2393	13.1652	16.7753	15.9513	16.7885	74.1051	63.1541	215.154	19.4026	18.2275	16.4838	78.3181	110.505	48.3705	156.79	14.2997	14.4436	18.8421	15.6256	460.037	313.796	199.835	15.691	17.3823
Plac1l	13.6267	13.9117	14.7364	18.1182	15.4789	111.5	12.7014	13.0768	12.4682	13.1916	13.3372	14.1143	12.5309	12.4943	15.3044	12.7553	13.1271	12.7396	14.109	14.7352	16.0222	17.3824	14.0341	15.8958	15.4039
Klrc1	11.7804	13.8961	11.8009	11.2088	12.7954	12.4258	415.971	16.2207	248.79	12.7339	14.6525	12.2002	15.9952	12.131	13.2288	14.9764	415.915	33.4304	14.3814	13.3232	21.2434	33.4335	28.2395	13.2256	13.4802
Mucl1	14.5575	13.8541	12.5513	10.0815	11.4098	11.5054	12.7432	13.7522	13.2344	12.2164	13.8781	13.9444	14.3024	16.0896	13.4611	13.5166	12.4346	13.1743	13.4568	14.2112	11.9665	14.1478	13.1672	310.345	293.985
Trbv5	13.1991	13.8304	12.2788	12.1534	14.9456	13.2427	217.997	619.1	387.619	13.0631	12.5663	14.2294	729.332	160.337	2045.51	1792.57	199.968	1397.31	1075.06	11.9858	311.816	13.7226	14.9415	12.8715	13.2001
Cd3g	13.2035	13.8061	13.1075	14.2023	13.8448	11.816	1967.09	7054.18	7570.62	12.2699	13.8753	11.8496	2567.9	2351.37	8137.9	8810.84	2254.81	8191.9	7311.2	18.2298	14615.2	59.2812	43.7608	11.2854	11.7548
Mmp12	26.6339	13.5864	540.049	15.1757	13.6868	14.1055	14.2108	14.466	15.2521	2645.03	812.429	2836.03	14.5281	13.191	14.9177	15.3079	13.4234	136.634	98.0749	12.682	13.1641	17.2433	16.6869	5286.51	6282.39
Cd226	11.7813	13.5233	79.8846	12.0092	13.5013	12.6798	159.151	737.936	417.901	12.1611	11.8841	11.6435	91.4434	283.957	212.983	113.068	61.5656	151.019	84.9529	18.4324	261.766	424.057	253.244	25.6488	18.577
Tktl1	26.7099	13.3599	13.0834	21.0039	16.458	116.296	11.9135	13.048	17.1371	12.1343	12.6797	12.7531	16.1613	28.7127	16.6153	24.2786	13.3213	14.3529	188.686	13.1708	13.0971	14.8126	12.3807	12.9363	12.9934
Cxcr6	14.0199	13.3465	22.7476	13.4454	12.6842	14.936	220.119	1259.56	1455.84	13.893	15.248	14.7064	71.3863	343.078	122.661	192.964	197.415	1329.44	4474.01	12.036	3164.7	38.7151	136.065	12.6168	12.9412
Gzmg	11.2284	13.2215	11.2386	13.2676	12.8556	14.3531	11.5632	11.4196	11.0585	11.0481	10.8045	11.0316	11.7641	14.4831	11.8953	11.4327	29.3472	13.6201	605.656	12.3343	12.4609	12.3793	12.6887	12.4419	12.506
Sema3d	15.8068	13.1886	14.383	17.3793	17.7495	17.3285	13.4941	15.7262	15.1743	13.9597	14.7159	14.2025	19.3643	15.4634	14.8871	14.8787	15.9191	35.4453	16.2073	13.7559	14.0522	14.5944	14.4087	14.3213	14.2979
Il21	14.6082	13.0266	13.3294	14.4875	22.8367	15.7587	17.5414	15.1196	16.4405	12.7806	12.8633	13.3145	21.6721	335.67	13.6291	1453.82	376.504	2988.56	23.8527	13.1714	13.0058	12.4532	13.5482	13.968	14.1435
Khdc1a	10.8086	12.9612	11.2077	13.6184	12.4669	13.377	16.1517	11.2109	10.2325	11.8698	14.3976	12.0486	29.261	23.4287	12.4405	11.9988	13.0318	12.0587	10.6533	19.2052	15.7794	354.418	119.619	18.9322	16.8848
BC030307	12.6273	12.946	11.7027	11.5104	12.5238	83.1281	16.177	14.4516	14.2894	12.6683	12.1028	12.4803	13.5553	14.9742	15.4012	12.2629	13.6709	13.8176	14.2656	13.8764	12.2006	12.1692	11.4776	11.8451	11.4539
1110032F04Rik	12.4753	12.8844	18.9564	11.7559	15.2894	13.5244	388.196	28.3222	46.6325	11.7121	18.8123	12.4849	375.588	23.8119	165.643	44.2194	404.118	102.443	17.1517	10.8436	14.536	12.9116	31.7245	31.5645	15.0446
Cd200r3	936.262	12.7262	154.947	17.4272	12.1728	11.3646	11.6583	11.9049	11.1794	11.8986	12.2426	12.0956	11.8898	12.7035	17.3653	12.3204	11.4633	12.9732	137.655	11.244	11.6471	11.7922	11.6863	14.3676	18.0508
Ambn	14.154	12.7261	13.3787	12.1087	16.6206	16.269	13.6193	14.3022	13.2626	17.5881	16.4567	17.0396	14.649	15.5236	13.6332	14.0938	13.9831	14.0096	113.501	12.5139	13.7958	13.529	13.521	13.1467	13.1404
Il6	2266.76	12.6792	1981.82	21.298	11.637	14.4971	11.9159	9.65839	9.69781	11.5512	1316.85	10.9015	12.0256	10.1875	9.84478	18.6453	13.9529	12.6317	14.738	9.9796	10.9408	11.2906	10.573	9324.38	102.377
Ahrr	418.48	12.522	85.013	16.4276	15.8294	23.5463	17.6304	15.2146	16.7322	275.717	192.525	507.626	18.4377	13.5775	15.5716	14.0754	27.484	35.1565	36.5029	20.5097	178.912	12.9126	145.471	311.016	543.761
Klra8	15.9793	12.5172	11.3311	12.0368	12.2006	10.1292	18.1913	11.9019	256.808	11.1444	12.586	11.6849	13.2664	20.9021	12.0478	11.4091	12.0704	11.6292	11.4866	27.6162	11.782	10361.6	5190.19	11.3424	11.3798
2010106E10Rik	12.4357	12.4067	12.7998	13.7553	11.4273	12.8348	13.5544	14.8324	14.3124	11.4319	10.7435	11.1162	12.2074	11.5025	12.6808	13.0769	10.2331	12.9763	14.3672	11.1454	255.663	12.33	12.2743	10.8991	11.0527
Htra4	13.1385	12.1006	12.2835	12.907	13.0182	12.1529	14.0319	12.8635	12.3336	17.6597	24.0656	16.1061	12.8855	14.412	12.9253	12.8456	13.6699	12.7448	12.8789	11.3503	12.072	13.0808	14.3221	1004.35	15.5556
Serpinb7	10.9747	12.0205	11.0016	20.4258	52.59	97.9003	10.309	10.4463	10.4441	10.9371	10.201	10.8379	12.5928	11.6178	11.5397	10.7037	11.8826	9.84379	10.2577	12.9932	13.442	12.9975	13.9441	40.0161	13.867
Sh2d1a	13.6508	11.9453	9.48238	11.6466	12.221	11.1614	1584.53	688.121	1727.47	11.5309	11.8094	10.7308	476.724	492.069	929.432	3977.43	280.212	1388.05	235.805	9.25355	14.3421	649.752	567.619	9.64433	9.74215
Slc15a1	13.8855	11.8803	12.5796	18.909	12.7318	13.4515	12.7357	12.0097	12.3016	14.4289	11.2244	13.3237	13.1289	12.3821	17.8438	13.1685	16.2399	33.2683	13.7595	12.2601	69.3847	12.5712	13.4597	12.7277	13.8631
A430108G06Rik	14.284	11.7669	19.8759	12.6852	13.2101	14.0355	13.1673	12.7875	13.1356	64.7217	16.2228	35.2114	12.0126	10.5231	13.2099	12.9981	13.6605	12.7706	13.5082	11.65	13.1873	11.4836	10.5794	13.5215	14.5567
Klrb1b	10.8999	11.7059	21.7196	12.3657	12.0498	11.1758	11.5728	10.6101	10.7432	11.4094	11.9815	11.7122	14.6524	12.1968	11.1654	11.353	11.0364	10.63	11.4059	11.2477	11.4456	223.386	262.498	22.2513	27.9532
1700061F12Rik	11.6036	11.4267	10.4681	12.4686	10.4981	11.2607	10.8642	10.7328	9.96335	9.84762	10.8261	10.5182	10.9091	12.282	9.79629	10.6363	10.3328	9.77895	398.477	10.7084	11.0778	11.0384	10.8046	10.6262	10.8217
Sval1	12.8251	11.3006	11.3553	11.9259	13.0086	11.8437	14.4865	12.6394	11.7885	10.9324	12.1226	11.8566	11.1881	10.672	10.6826	12.1876	11.2763	12.9922	382.612	11.4364	11.8622	11.9523	11.1105	11.552	11.243
Otop1	197.194	11.2551	12.4532	11.9625	12.6223	12.1721	11.7941	13.0441	12.6078	11.234	12.0932	11.5865	11.7282	12.1465	13.182	13.4288	13.6823	11.2342	12.4605	12.5318	13.011	12.6832	13.1694	12.8556	12.1572
Dmrta1	11.3583	11.084	11.7545	11.5043	11.5422	10.5728	11.329	37.083	531.97	11.5186	12.4346	10.9405	10.0847	13.2948	11.9825	10.7234	10.9254	11.1541	10.011	10.2985	10.8069	42.4386	28.2143	10.4082	10.6028
Gpr174	300.971	10.7604	22.826	292.3	351.191	36.9993	230.839	319.182	443.578	11.8006	11.7161	11.6703	150.653	267.63	279.673	360.661	171.786	248.796	250.483	8.3163	25.5253	527.794	301.525	9.86699	10.2447
Hsf2	13.8959	10.5044	12.9598	12.5448	15.3085	13.1243	222.206	29.6373	13.7554	62.3557	58.9706	39.4292	32.9642	11.0715	41.1754	26.1001	10.836	12.2021	11.1205	9.35637	16.6973	10.655	11.0267	59.3193	29.1267
Rgs13	380.004	10.493	10.5015	46.2916	19.9183	10.5963	9.98045	10.686	10.1491	9.99599	10.4165	9.68964	9.83152	9.98997	10.2914	10.3978	10.9926	9.80307	9.69058	9.64835	10.6864	10.2739	9.3758	10.1546	10.0785
5430437J10Rik	11.0589	10.464	10.9385	9.89151	10.0609	10.4701	9.61589	10.2942	9.55452	20.418	25.5116	13.6801	10.4271	10.0034	9.61929	9.79095	10.606	10.2292	10.2083	217.402	12.6232	10.5114	10.0912	301.257	227.531
Klra1	8.93649	10.2756	9.81386	9.61519	12.6926	9.5864	186.952	10.3633	342.439	8.39323	9.86397	9.44406	10.1548	11.8675	8.96447	9.77977	11.7809	9.4991	8.8167	8.61099	18.82	1365.02	1263.01	8.60336	9.18187
Gzmc	89.9911	10.2514	23.4491	9.98191	11.2658	11.5986	743.759	11.9374	11.6733	11.1903	12.0664	12.3007	25.9047	15.9839	17.5444	17.9477	1880.26	23.1224	573.23	10.2337	120.023	32.6518	372.935	11.5169	11.8614
Tcrg-V4	10.2645	9.91552	9.70643	10.7695	10.3307	8.8423	11.5338	9.37973	25.1723	8.89497	9.3474	9.22331	9.97585	10.0618	9.63913	9.12371	57.2514	19.0427	17.2166	9.11382	979.733	10.6212	10.3767	9.0954	9.29285
Cxcl3	9.41725	9.87554	646.152	10.335	12.6339	10.3679	9.14871	10.2923	9.54698	17.4959	21.6865	14.7252	11.3877	11.7788	10.368	28.2335	9.90095	85.7737	55.9888	7.81844	9.14931	10.4926	10.2028	6375.52	2425.2
Gzme	132.069	9.81846	9.50474	9.76481	10.0999	9.74855	30.5229	9.39409	9.44459	9.1655	10.7835	9.16935	10.1479	9.44805	10.334	9.67367	186.576	10.5499	324.366	9.55659	10.4508	10.4178	10.5542	10.3062	9.62698
BC061194	9.53766	9.65611	10.2972	10.113	12.8651	56.7341	9.56248	9.12071	10.127	8.59203	10.1163	8.93902	9.25177	10.1633	8.87562	9.32289	9.48635	9.32602	9.34875	9.40762	8.92433	9.70525	9.94094	9.08558	8.93059
A530021J07Rik	9.24489	9.29026	9.43755	10.2173	10.2406	9.54353	9.19984	21.4118	10.7508	9.19512	9.0853	9.04606	9.99551	10.0666	120.447	10.5957	8.92344	10.3054	9.15845	8.95887	8.62717	9.20843	9.0568	8.99681	9.09772
Gzmd	343.157	8.89473	8.88713	9.92456	10.0767	9.32248	36.8747	8.69731	8.52131	8.82675	8.76951	9.31388	9.25169	9.21482	9.15498	9.19648	399.298	9.39072	793.326	8.84533	9.99586	9.05465	8.90562	10.3367	10.1504

## Sheet: group
sampleID	group
GSM2539097	Sham
GSM2539098	Sham
GSM2539099	Sham
GSM2539100	Sham
GSM2539105	II/R
GSM2539106	II/R
GSM2539107	II/R
GSM2539108	II/R

## Sheet: Hub genes
NAME	GSM2539097	GSM2539098	GSM2539099	GSM2539100	GSM2539105	GSM2539106	GSM2539107	GSM2539108
Myc	11.6111	11.0758	11.324	11.0458	13.0419	14.1827	14.2459	13.5108
Hif1a	13.5467	13.8303	13.9198	13.9375	15.0178	14.9328	15.0178	15.0467
Zfyve1	10.4237	10.657	10.7133	10.3058	9.21387	9.71958	9.32836	9.50482
Sqstm1	12.5645	13.1323	12.9566	12.8778	14.2609	13.8857	13.8024	13.7983
Gabarapl1	10.3902	10.8514	10.8312	11.0475	12.4649	11.6874	11.4376	11.9223

## Sheet: CIBERSORT-Results
id	Mast.Cells	Neutrophil.Cells	Eosinophil.Cells	B.Cells.Memory	B.Cells.Naive	Plasma.Cells	T.Cells.CD8.Actived	T.Cells.CD8.Naive	T.Cells.CD8.Memory	M0.Macrophage	M1.Macrophage	M2.Macrophage	Treg.Cells	T.Cells.CD4.Memory	T.Cells.CD4.Naive	T.Cells.CD4.Follicular	Th1.Cells	Th17.Cells	Th2.Cells	Monocyte	GammaDelta.T.Cells	NK.Resting	NK.Actived	DC.Actived	DC.Immature
GSM2539097	0.00162554891520846	0	0	0	0.182607254349273	0.0410852344630911	0	0.0442732193575752	0	0.0345199365998745	0.0985802361244819	0	0	0.139014983184704	0	0	0.0236904965935044	0.0838086118735795	0.0960922885194719	0.0345320631765299	0.0884476467374763	0	0.0708560492377478	0	0.0608664308674824
GSM2539098	0.00127576526482934	0	0	0	0.362686861642127	0.0317553594595489	0	0.0250581280790208	0	0	0.132991760307074	0.018389305989772	0	0.117623851004236	0	0	0.00616428088467822	0.0700198233470328	0.0436891372755576	0.018008961809832	0.0625373640043284	0	0.0473893493553382	0	0.0624100515766246
GSM2539099	0.00445834097715464	0	0	0	0.198569957259216	0.0780298479819809	0	0.0685780431152061	0	0	0.123225641406925	0.0244524121682675	0	0.131141638718397	0	0	0.00925037133879946	0.0490959231328436	0.0516502490971701	0.0340759043153975	0.124662346629486	0	0.0627746927116583	0	0.040034631147498
GSM2539100	0	0	0	0	0.443912608785387	0.0490575097318675	0	0.0354108452828754	0	0	0.0820205691730826	0.0135585242932868	0	0.0998635401796329	0	0	0.0151143885319655	0.0682563782817508	0.0320756963591724	0.0166300915171662	0.0936248587125096	0.0106665873233409	0	0	0.0398084018279626
GSM2539105	0.00308838622871933	0.0098685756411545	0	0	0.134920812239596	0.032819827238204	0.0088172670305698	0	0	0.0116424387404623	0.100711575414313	0.13469547059599	0	0.0899716638626339	0	0	0.0090281148304816	0.0765918053213754	0.0542632111479134	0.0294567423545244	0.0233425177594566	0	0.103515926220532	0.177265665374075	0
GSM2539106	0.00330678691529851	0	0.00132572443746751	0	0.258968139702297	0.0494409722685645	0	0	0	0	0.020116230500881	0.0679077536869119	0	0.131490846246927	0.0882704847026203	0	0.0175297427338908	0	0.0840204160048577	0	0.106756204810401	0	0.105462009751195	0.0654046882386877	0
GSM2539107	0.00257718825825469	0	0.00220554774576894	0	0.229499560594592	0.0631770858928108	0	0	0	0	0.0291486899150993	0.0795184485957446	0	0.18300911524502	0.0590522105437962	0	0.0116857835513779	0.0455021255196792	0.0626200847027963	0	0.0970168843028234	0	0.0613306267497138	0.0736566483825224	0
GSM2539108	0.000761159124635404	0	0	0	0.160366790961918	0.0463149472806216	0	0.0652870579150334	0	0	0.110233715452397	0.111482106427407	0	0.124029295533872	0	0	0.0118037989833814	0.0549559885613205	0.0523787655517747	0.0151316702529516	0.0784187205293472	0	0.119035919747818	0.0498000636775223	0
