# Supplementary material for: Identification of autophagy-related genes in intestinal ischemia-reperfusion injury and their role in immune infiltration
Source: Front Physiol. 2025 May 26;16:1601968. doi: 10.3389/fphys.2025.1601968 (PMC12146356; doi:10.3389/fphys.2025.1601968)
Supplement: Supplementary file 10 [file Table8.xls]

## Sheet: miRWalk_miRNA_Targets
mirnaid	genesymbol	TargetScan	miRDB
mmu-miR-138-5p	Hif1a	1	1
mmu-miR-199a-5p	Hif1a	1	1
mmu-miR-199a-5p	Hif1a	1	1
mmu-miR-125b-5p	Zfyve1	1	1
mmu-miR-146a-5p	Zfyve1	1	1
mmu-miR-351-5p	Zfyve1	1	1
mmu-miR-212-3p	Zfyve1	1	1
mmu-miR-212-3p	Zfyve1	1	1
mmu-miR-125b-5p	Zfyve1	1	1
mmu-miR-125b-5p	Zfyve1	1	1
mmu-miR-351-5p	Zfyve1	1	1
mmu-miR-351-5p	Zfyve1	1	1
mmu-miR-212-3p	Zfyve1	1	1
mmu-miR-212-3p	Zfyve1	1	1
mmu-miR-133c	Gabarapl1	1	1
mmu-miR-7077-5p	Myc	0	1
mmu-miR-7077-5p	Myc	0	1
mmu-miR-7077-5p	Myc	0	1
mmu-miR-7077-5p	Myc	0	1
mmu-miR-3058-5p	Sqstm1	0	1
mmu-miR-344g-5p	Sqstm1	0	1
mmu-miR-6383	Sqstm1	0	1
mmu-miR-6933-5p	Sqstm1	0	1
mmu-miR-6978-3p	Sqstm1	0	1
mmu-miR-7006-5p	Sqstm1	0	1
mmu-miR-3058-5p	Sqstm1	0	1
mmu-miR-344g-5p	Sqstm1	0	1
mmu-miR-6383	Sqstm1	0	1
mmu-miR-6933-5p	Sqstm1	0	1
mmu-miR-6978-3p	Sqstm1	0	1
mmu-miR-7006-5p	Sqstm1	0	1
mmu-miR-330-3p	Hif1a	0	1
mmu-miR-217-5p	Hif1a	0	1
mmu-miR-3099-5p	Hif1a	0	1
mmu-miR-1194	Hif1a	0	1
mmu-miR-3074-2-3p	Hif1a	0	1
mmu-miR-3961	Hif1a	0	1
mmu-miR-217-5p	Hif1a	0	1
mmu-miR-3099-5p	Hif1a	0	1
mmu-miR-1194	Hif1a	0	1
mmu-miR-3074-2-3p	Hif1a	0	1
mmu-miR-3961	Hif1a	0	1
mmu-miR-6416-3p	Hif1a	0	1
mmu-miR-326-5p	Zfyve1	0	1
mmu-miR-486a-3p	Zfyve1	0	1
mmu-miR-1247-3p	Zfyve1	0	1
mmu-miR-1247-3p	Zfyve1	0	1
mmu-miR-455-3p	Zfyve1	0	1
mmu-miR-6379	Zfyve1	0	1
mmu-miR-6954-5p	Zfyve1	0	1
mmu-miR-7086-5p	Zfyve1	0	1
mmu-miR-7086-5p	Zfyve1	0	1
mmu-miR-486a-3p	Zfyve1	0	1
mmu-miR-455-3p	Zfyve1	0	1
mmu-miR-6954-5p	Zfyve1	0	1
mmu-miR-7086-5p	Zfyve1	0	1
mmu-miR-18a-3p	Gabarapl1	0	1
mmu-miR-1956	Gabarapl1	0	1
mmu-miR-5046	Gabarapl1	0	1
mmu-miR-6916-3p	Gabarapl1	0	1
mmu-miR-6919-3p	Gabarapl1	0	1
mmu-miR-6919-3p	Gabarapl1	0	1
mmu-miR-6999-5p	Gabarapl1	0	1
mmu-miR-7054-5p	Gabarapl1	0	1
mmu-miR-8092	Gabarapl1	0	1
mmu-miR-15b-5p	Hif1a	1	0
mmu-miR-15b-5p	Hif1a	1	0
mmu-miR-6415	Myc	0	0
mmu-miR-7117-5p	Myc	0	0
mmu-miR-6415	Myc	0	0
mmu-miR-7117-5p	Myc	0	0
mmu-miR-6415	Myc	0	0
mmu-miR-7117-5p	Myc	0	0
mmu-miR-6415	Myc	0	0
mmu-miR-7117-5p	Myc	0	0
mmu-miR-202-3p	Myc	0	0
mmu-miR-299a-5p	Myc	0	0
mmu-miR-103-1-5p	Myc	0	0
mmu-miR-148b-3p	Myc	0	0
mmu-miR-338-3p	Myc	0	0
mmu-miR-344-5p	Myc	0	0
mmu-miR-28a-5p	Myc	0	0
mmu-miR-218-2-3p	Myc	0	0
mmu-miR-219a-2-3p	Myc	0	0
mmu-miR-1249-5p	Myc	0	0
mmu-miR-671-3p	Myc	0	0
mmu-miR-678	Myc	0	0
mmu-miR-652-3p	Myc	0	0
mmu-miR-742-3p	Myc	0	0
mmu-miR-879-5p	Myc	0	0
mmu-miR-874-5p	Myc	0	0
mmu-miR-18b-5p	Myc	0	0
mmu-miR-467e-5p	Myc	0	0
mmu-miR-1960	Myc	0	0
mmu-miR-3073a-5p	Myc	0	0
mmu-miR-3075-5p	Myc	0	0
mmu-miR-344g-3p	Myc	0	0
mmu-miR-344f-3p	Myc	0	0
mmu-miR-3102-3p.2-3p	Myc	0	0
mmu-miR-28c	Myc	0	0
mmu-miR-6356	Myc	0	0
mmu-miR-6367	Myc	0	0
mmu-miR-378c	Myc	0	0
mmu-miR-6392-5p	Myc	0	0
mmu-miR-6540-3p	Myc	0	0
mmu-miR-6906-3p	Myc	0	0
mmu-miR-6913-5p	Myc	0	0
mmu-miR-6975-3p	Myc	0	0
mmu-miR-6992-5p	Myc	0	0
mmu-miR-7017-5p	Myc	0	0
mmu-miR-7220-3p	Myc	0	0
mmu-miR-7673-3p	Myc	0	0
mmu-miR-7678-3p	Myc	0	0
mmu-miR-12188-3p	Myc	0	0
mmu-miR-202-3p	Myc	0	0
mmu-miR-299a-5p	Myc	0	0
mmu-miR-103-1-5p	Myc	0	0
mmu-miR-148b-3p	Myc	0	0
mmu-miR-338-3p	Myc	0	0
mmu-miR-344-5p	Myc	0	0
mmu-miR-28a-5p	Myc	0	0
mmu-miR-218-2-3p	Myc	0	0
mmu-miR-219a-2-3p	Myc	0	0
mmu-miR-1249-5p	Myc	0	0
mmu-miR-671-3p	Myc	0	0
mmu-miR-678	Myc	0	0
mmu-miR-652-3p	Myc	0	0
mmu-miR-742-3p	Myc	0	0
mmu-miR-879-5p	Myc	0	0
mmu-miR-874-5p	Myc	0	0
mmu-miR-18b-5p	Myc	0	0
mmu-miR-467e-5p	Myc	0	0
mmu-miR-1960	Myc	0	0
mmu-miR-3073a-5p	Myc	0	0
mmu-miR-3075-5p	Myc	0	0
mmu-miR-344g-3p	Myc	0	0
mmu-miR-344f-3p	Myc	0	0
mmu-miR-3102-3p.2-3p	Myc	0	0
mmu-miR-28c	Myc	0	0
mmu-miR-6356	Myc	0	0
mmu-miR-6367	Myc	0	0
mmu-miR-378c	Myc	0	0
mmu-miR-6392-5p	Myc	0	0
mmu-miR-6540-3p	Myc	0	0
mmu-miR-6906-3p	Myc	0	0
mmu-miR-6913-5p	Myc	0	0
mmu-miR-6975-3p	Myc	0	0
mmu-miR-6992-5p	Myc	0	0
mmu-miR-7017-5p	Myc	0	0
mmu-miR-7220-3p	Myc	0	0
mmu-miR-7673-3p	Myc	0	0
mmu-miR-7678-3p	Myc	0	0
mmu-miR-12188-3p	Myc	0	0
mmu-miR-202-3p	Myc	0	0
mmu-miR-299a-5p	Myc	0	0
mmu-miR-103-1-5p	Myc	0	0
mmu-miR-148b-3p	Myc	0	0
mmu-miR-338-3p	Myc	0	0
mmu-miR-344-5p	Myc	0	0
mmu-miR-28a-5p	Myc	0	0
mmu-miR-218-2-3p	Myc	0	0
mmu-miR-219a-2-3p	Myc	0	0
mmu-miR-1249-5p	Myc	0	0
mmu-miR-671-3p	Myc	0	0
mmu-miR-678	Myc	0	0
mmu-miR-652-3p	Myc	0	0
mmu-miR-742-3p	Myc	0	0
mmu-miR-879-5p	Myc	0	0
mmu-miR-874-5p	Myc	0	0
mmu-miR-18b-5p	Myc	0	0
mmu-miR-467e-5p	Myc	0	0
mmu-miR-1960	Myc	0	0
mmu-miR-3073a-5p	Myc	0	0
mmu-miR-3075-5p	Myc	0	0
mmu-miR-344g-3p	Myc	0	0
mmu-miR-344f-3p	Myc	0	0
mmu-miR-3102-3p.2-3p	Myc	0	0
mmu-miR-28c	Myc	0	0
mmu-miR-6356	Myc	0	0
mmu-miR-6367	Myc	0	0
mmu-miR-378c	Myc	0	0
mmu-miR-6392-5p	Myc	0	0
mmu-miR-6540-3p	Myc	0	0
mmu-miR-6906-3p	Myc	0	0
mmu-miR-6913-5p	Myc	0	0
mmu-miR-6975-3p	Myc	0	0
mmu-miR-6992-5p	Myc	0	0
mmu-miR-7017-5p	Myc	0	0
mmu-miR-7220-3p	Myc	0	0
mmu-miR-7673-3p	Myc	0	0
mmu-miR-7678-3p	Myc	0	0
mmu-miR-12188-3p	Myc	0	0
mmu-miR-202-3p	Myc	0	0
mmu-miR-299a-5p	Myc	0	0
mmu-miR-103-1-5p	Myc	0	0
mmu-miR-148b-3p	Myc	0	0
mmu-miR-338-3p	Myc	0	0
mmu-miR-344-5p	Myc	0	0
mmu-miR-28a-5p	Myc	0	0
mmu-miR-218-2-3p	Myc	0	0
mmu-miR-219a-2-3p	Myc	0	0
mmu-miR-1249-5p	Myc	0	0
mmu-miR-671-3p	Myc	0	0
mmu-miR-678	Myc	0	0
mmu-miR-652-3p	Myc	0	0
mmu-miR-742-3p	Myc	0	0
mmu-miR-879-5p	Myc	0	0
mmu-miR-874-5p	Myc	0	0
mmu-miR-18b-5p	Myc	0	0
mmu-miR-467e-5p	Myc	0	0
mmu-miR-1960	Myc	0	0
mmu-miR-3073a-5p	Myc	0	0
mmu-miR-3075-5p	Myc	0	0
mmu-miR-344g-3p	Myc	0	0
mmu-miR-344f-3p	Myc	0	0
mmu-miR-3102-3p.2-3p	Myc	0	0
mmu-miR-28c	Myc	0	0
mmu-miR-6356	Myc	0	0
mmu-miR-6367	Myc	0	0
mmu-miR-378c	Myc	0	0
mmu-miR-6392-5p	Myc	0	0
mmu-miR-6540-3p	Myc	0	0
mmu-miR-6906-3p	Myc	0	0
mmu-miR-6913-5p	Myc	0	0
mmu-miR-6975-3p	Myc	0	0
mmu-miR-6992-5p	Myc	0	0
mmu-miR-7017-5p	Myc	0	0
mmu-miR-7220-3p	Myc	0	0
mmu-miR-7673-3p	Myc	0	0
mmu-miR-7678-3p	Myc	0	0
mmu-miR-12188-3p	Myc	0	0
mmu-miR-337-5p	Sqstm1	0	0
mmu-miR-410-5p	Sqstm1	0	0
mmu-miR-370-3p	Sqstm1	0	0
mmu-miR-337-5p	Sqstm1	0	0
mmu-miR-410-5p	Sqstm1	0	0
mmu-miR-370-3p	Sqstm1	0	0
mmu-miR-6943-5p	Sqstm1	0	0
mmu-miR-6943-5p	Sqstm1	0	0
mmu-miR-7049-3p	Sqstm1	0	0
mmu-miR-7049-3p	Sqstm1	0	0
mmu-miR-130a-3p	Sqstm1	0	0
mmu-miR-134-3p	Sqstm1	0	0
mmu-miR-150-3p	Sqstm1	0	0
mmu-miR-10b-5p	Sqstm1	0	0
mmu-miR-24-3p	Sqstm1	0	0
mmu-miR-143-5p	Sqstm1	0	0
mmu-miR-299a-5p	Sqstm1	0	0
mmu-miR-34c-5p	Sqstm1	0	0
mmu-let-7d-3p	Sqstm1	0	0
mmu-miR-106b-3p	Sqstm1	0	0
mmu-miR-130b-5p	Sqstm1	0	0
mmu-miR-96-5p	Sqstm1	0	0
mmu-miR-323-3p	Sqstm1	0	0
mmu-miR-324-5p	Sqstm1	0	0
mmu-miR-326-5p	Sqstm1	0	0
mmu-miR-330-5p	Sqstm1	0	0
mmu-miR-330-3p	Sqstm1	0	0
mmu-miR-331-3p	Sqstm1	0	0
mmu-miR-339-5p	Sqstm1	0	0
mmu-miR-346-3p	Sqstm1	0	0
mmu-miR-10a-5p	Sqstm1	0	0
mmu-miR-214-5p	Sqstm1	0	0
mmu-miR-211-3p	Sqstm1	0	0
mmu-miR-125b-1-3p	Sqstm1	0	0
mmu-miR-452-5p	Sqstm1	0	0
mmu-miR-485-3p	Sqstm1	0	0
mmu-miR-546	Sqstm1	0	0
mmu-miR-541-5p	Sqstm1	0	0
mmu-miR-20b-3p	Sqstm1	0	0
mmu-miR-302c-5p	Sqstm1	0	0
mmu-miR-675-5p	Sqstm1	0	0
mmu-miR-744-5p	Sqstm1	0	0
mmu-miR-216b-3p	Sqstm1	0	0
mmu-miR-1843a-5p	Sqstm1	0	0
mmu-miR-1298-5p	Sqstm1	0	0
mmu-miR-669b-5p	Sqstm1	0	0
mmu-miR-297b-3p	Sqstm1	0	0
mmu-miR-697	Sqstm1	0	0
mmu-miR-705	Sqstm1	0	0
mmu-miR-721	Sqstm1	0	0
mmu-miR-721	Sqstm1	0	0
mmu-miR-615-5p	Sqstm1	0	0
mmu-miR-742-3p	Sqstm1	0	0
mmu-miR-743a-5p	Sqstm1	0	0
mmu-miR-181d-3p	Sqstm1	0	0
mmu-miR-883b-5p	Sqstm1	0	0
mmu-miR-190b-3p	Sqstm1	0	0
mmu-miR-297a-3p	Sqstm1	0	0
mmu-miR-297c-3p	Sqstm1	0	0
mmu-miR-493-3p	Sqstm1	0	0
mmu-miR-504-3p	Sqstm1	0	0
mmu-miR-92b-5p	Sqstm1	0	0
mmu-miR-878-5p	Sqstm1	0	0
mmu-miR-511-5p	Sqstm1	0	0
mmu-miR-669f-5p	Sqstm1	0	0
mmu-miR-1188-5p	Sqstm1	0	0
mmu-miR-466f	Sqstm1	0	0
mmu-miR-669e-5p	Sqstm1	0	0
mmu-miR-1894-5p	Sqstm1	0	0
mmu-miR-1931	Sqstm1	0	0
mmu-miR-1943-5p	Sqstm1	0	0
mmu-miR-1945	Sqstm1	0	0
mmu-miR-1945	Sqstm1	0	0
mmu-miR-669o-5p	Sqstm1	0	0
mmu-miR-1983	Sqstm1	0	0
mmu-miR-1981-5p	Sqstm1	0	0
mmu-miR-2139	Sqstm1	0	0
mmu-miR-3057-5p	Sqstm1	0	0
mmu-miR-3064-5p	Sqstm1	0	0
mmu-miR-3070-2-3p	Sqstm1	0	0
mmu-miR-3074-1-3p	Sqstm1	0	0
mmu-miR-3076-5p	Sqstm1	0	0
mmu-miR-3084-5p	Sqstm1	0	0
mmu-miR-3087-3p	Sqstm1	0	0
mmu-miR-3097-5p	Sqstm1	0	0
mmu-miR-3098-3p	Sqstm1	0	0
mmu-miR-344g-3p	Sqstm1	0	0
mmu-miR-3102-5p	Sqstm1	0	0
mmu-miR-3105-3p	Sqstm1	0	0
mmu-miR-486b-3p	Sqstm1	0	0
mmu-miR-1843b-5p	Sqstm1	0	0
mmu-miR-1843b-5p	Sqstm1	0	0
mmu-miR-5107-5p	Sqstm1	0	0
mmu-miR-5120	Sqstm1	0	0
mmu-miR-3544-5p	Sqstm1	0	0
mmu-miR-299b-5p	Sqstm1	0	0
mmu-miR-5620-5p	Sqstm1	0	0
mmu-miR-6337	Sqstm1	0	0
mmu-miR-6346	Sqstm1	0	0
mmu-miR-6400	Sqstm1	0	0
mmu-miR-6400	Sqstm1	0	0
mmu-miR-6400	Sqstm1	0	0
mmu-miR-6405	Sqstm1	0	0
mmu-miR-6413	Sqstm1	0	0
mmu-miR-6901-5p	Sqstm1	0	0
mmu-miR-6909-5p	Sqstm1	0	0
mmu-miR-6912-5p	Sqstm1	0	0
mmu-miR-6914-5p	Sqstm1	0	0
mmu-miR-6923-5p	Sqstm1	0	0
mmu-miR-6923-5p	Sqstm1	0	0
mmu-miR-6926-5p	Sqstm1	0	0
mmu-miR-6928-5p	Sqstm1	0	0
mmu-miR-6930-5p	Sqstm1	0	0
mmu-miR-6930-5p	Sqstm1	0	0
mmu-miR-6931-5p	Sqstm1	0	0
mmu-miR-6932-3p	Sqstm1	0	0
mmu-miR-6937-5p	Sqstm1	0	0
mmu-miR-6938-3p	Sqstm1	0	0
mmu-miR-6942-5p	Sqstm1	0	0
mmu-miR-6954-5p	Sqstm1	0	0
mmu-miR-6964-3p	Sqstm1	0	0
mmu-miR-6975-5p	Sqstm1	0	0
mmu-miR-6979-3p	Sqstm1	0	0
mmu-miR-6980-5p	Sqstm1	0	0
mmu-miR-6987-3p	Sqstm1	0	0
mmu-miR-6988-5p	Sqstm1	0	0
mmu-miR-6990-3p	Sqstm1	0	0
mmu-miR-6991-5p	Sqstm1	0	0
mmu-miR-6994-5p	Sqstm1	0	0
mmu-miR-6995-5p	Sqstm1	0	0
mmu-miR-6997-5p	Sqstm1	0	0
mmu-miR-7000-5p	Sqstm1	0	0
mmu-miR-7000-3p	Sqstm1	0	0
mmu-miR-7003-5p	Sqstm1	0	0
mmu-miR-7005-3p	Sqstm1	0	0
mmu-miR-7009-5p	Sqstm1	0	0
mmu-miR-7018-3p	Sqstm1	0	0
mmu-miR-7023-5p	Sqstm1	0	0
mmu-miR-7023-3p	Sqstm1	0	0
mmu-miR-7024-5p	Sqstm1	0	0
mmu-miR-7029-5p	Sqstm1	0	0
mmu-miR-7031-5p	Sqstm1	0	0
mmu-miR-7033-3p	Sqstm1	0	0
mmu-miR-7038-3p	Sqstm1	0	0
mmu-miR-7040-5p	Sqstm1	0	0
mmu-miR-7043-5p	Sqstm1	0	0
mmu-miR-7043-3p	Sqstm1	0	0
mmu-miR-7044-5p	Sqstm1	0	0
mmu-miR-7045-5p	Sqstm1	0	0
mmu-miR-7045-5p	Sqstm1	0	0
mmu-miR-7050-5p	Sqstm1	0	0
mmu-miR-7050-5p	Sqstm1	0	0
mmu-miR-7052-5p	Sqstm1	0	0
mmu-miR-7066-5p	Sqstm1	0	0
mmu-miR-7067-5p	Sqstm1	0	0
mmu-miR-6769b-5p	Sqstm1	0	0
mmu-miR-7070-5p	Sqstm1	0	0
mmu-miR-7076-5p	Sqstm1	0	0
mmu-miR-7078-5p	Sqstm1	0	0
mmu-miR-7087-5p	Sqstm1	0	0
mmu-miR-7094-1-5p	Sqstm1	0	0
mmu-miR-7094-3p	Sqstm1	0	0
mmu-miR-7115-5p	Sqstm1	0	0
mmu-miR-7117-5p	Sqstm1	0	0
mmu-miR-7118-5p	Sqstm1	0	0
mmu-miR-7213-5p	Sqstm1	0	0
mmu-miR-7222-3p	Sqstm1	0	0
mmu-miR-7222-3p	Sqstm1	0	0
mmu-miR-7236-5p	Sqstm1	0	0
mmu-miR-7239-3p	Sqstm1	0	0
mmu-miR-7665-5p	Sqstm1	0	0
mmu-miR-1191b-3p	Sqstm1	0	0
mmu-miR-3620-5p	Sqstm1	0	0
mmu-miR-7682-5p	Sqstm1	0	0
mmu-miR-7683-5p	Sqstm1	0	0
mmu-miR-1258-3p	Sqstm1	0	0
mmu-miR-8091	Sqstm1	0	0
mmu-miR-8104	Sqstm1	0	0
mmu-miR-8110	Sqstm1	0	0
mmu-miR-8113	Sqstm1	0	0
mmu-miR-12181-5p	Sqstm1	0	0
mmu-miR-12182-3p	Sqstm1	0	0
mmu-miR-12184-5p	Sqstm1	0	0
mmu-miR-12194-3p	Sqstm1	0	0
mmu-miR-12201-3p	Sqstm1	0	0
mmu-miR-130a-3p	Sqstm1	0	0
mmu-miR-134-3p	Sqstm1	0	0
mmu-miR-150-3p	Sqstm1	0	0
mmu-miR-10b-5p	Sqstm1	0	0
mmu-miR-24-3p	Sqstm1	0	0
mmu-miR-143-5p	Sqstm1	0	0
mmu-miR-299a-5p	Sqstm1	0	0
mmu-miR-34c-5p	Sqstm1	0	0
mmu-let-7d-3p	Sqstm1	0	0
mmu-miR-106b-3p	Sqstm1	0	0
mmu-miR-130b-5p	Sqstm1	0	0
mmu-miR-96-5p	Sqstm1	0	0
mmu-miR-323-3p	Sqstm1	0	0
mmu-miR-324-5p	Sqstm1	0	0
mmu-miR-326-5p	Sqstm1	0	0
mmu-miR-330-5p	Sqstm1	0	0
mmu-miR-330-3p	Sqstm1	0	0
mmu-miR-331-3p	Sqstm1	0	0
mmu-miR-339-5p	Sqstm1	0	0
mmu-miR-346-3p	Sqstm1	0	0
mmu-miR-10a-5p	Sqstm1	0	0
mmu-miR-214-5p	Sqstm1	0	0
mmu-miR-211-3p	Sqstm1	0	0
mmu-miR-125b-1-3p	Sqstm1	0	0
mmu-miR-452-5p	Sqstm1	0	0
mmu-miR-485-3p	Sqstm1	0	0
mmu-miR-546	Sqstm1	0	0
mmu-miR-541-5p	Sqstm1	0	0
mmu-miR-20b-3p	Sqstm1	0	0
mmu-miR-302c-5p	Sqstm1	0	0
mmu-miR-675-5p	Sqstm1	0	0
mmu-miR-744-5p	Sqstm1	0	0
mmu-miR-216b-3p	Sqstm1	0	0
mmu-miR-1843a-5p	Sqstm1	0	0
mmu-miR-1298-5p	Sqstm1	0	0
mmu-miR-669b-5p	Sqstm1	0	0
mmu-miR-297b-3p	Sqstm1	0	0
mmu-miR-697	Sqstm1	0	0
mmu-miR-721	Sqstm1	0	0
mmu-miR-721	Sqstm1	0	0
mmu-miR-615-5p	Sqstm1	0	0
mmu-miR-742-3p	Sqstm1	0	0
mmu-miR-743a-5p	Sqstm1	0	0
mmu-miR-181d-3p	Sqstm1	0	0
mmu-miR-883b-5p	Sqstm1	0	0
mmu-miR-190b-3p	Sqstm1	0	0
mmu-miR-297a-3p	Sqstm1	0	0
mmu-miR-297c-3p	Sqstm1	0	0
mmu-miR-493-3p	Sqstm1	0	0
mmu-miR-504-3p	Sqstm1	0	0
mmu-miR-92b-5p	Sqstm1	0	0
mmu-miR-878-5p	Sqstm1	0	0
mmu-miR-511-5p	Sqstm1	0	0
mmu-miR-669f-5p	Sqstm1	0	0
mmu-miR-1188-5p	Sqstm1	0	0
mmu-miR-466f	Sqstm1	0	0
mmu-miR-669e-5p	Sqstm1	0	0
mmu-miR-1894-5p	Sqstm1	0	0
mmu-miR-1931	Sqstm1	0	0
mmu-miR-1943-5p	Sqstm1	0	0
mmu-miR-1945	Sqstm1	0	0
mmu-miR-1945	Sqstm1	0	0
mmu-miR-669o-5p	Sqstm1	0	0
mmu-miR-1983	Sqstm1	0	0
mmu-miR-1981-5p	Sqstm1	0	0
mmu-miR-2139	Sqstm1	0	0
mmu-miR-3057-5p	Sqstm1	0	0
mmu-miR-3064-5p	Sqstm1	0	0
mmu-miR-3070-2-3p	Sqstm1	0	0
mmu-miR-3074-1-3p	Sqstm1	0	0
mmu-miR-3076-5p	Sqstm1	0	0
mmu-miR-3084-5p	Sqstm1	0	0
mmu-miR-3087-3p	Sqstm1	0	0
mmu-miR-3097-5p	Sqstm1	0	0
mmu-miR-3098-3p	Sqstm1	0	0
mmu-miR-344g-3p	Sqstm1	0	0
mmu-miR-3102-5p	Sqstm1	0	0
mmu-miR-3105-3p	Sqstm1	0	0
mmu-miR-486b-3p	Sqstm1	0	0
mmu-miR-1843b-5p	Sqstm1	0	0
mmu-miR-1843b-5p	Sqstm1	0	0
mmu-miR-5107-5p	Sqstm1	0	0
mmu-miR-5120	Sqstm1	0	0
mmu-miR-3544-5p	Sqstm1	0	0
mmu-miR-299b-5p	Sqstm1	0	0
mmu-miR-5620-5p	Sqstm1	0	0
mmu-miR-6337	Sqstm1	0	0
mmu-miR-6346	Sqstm1	0	0
mmu-miR-6400	Sqstm1	0	0
mmu-miR-6400	Sqstm1	0	0
mmu-miR-6400	Sqstm1	0	0
mmu-miR-6405	Sqstm1	0	0
mmu-miR-6413	Sqstm1	0	0
mmu-miR-6901-5p	Sqstm1	0	0
mmu-miR-6909-5p	Sqstm1	0	0
mmu-miR-6912-5p	Sqstm1	0	0
mmu-miR-6914-5p	Sqstm1	0	0
mmu-miR-6923-5p	Sqstm1	0	0
mmu-miR-6923-5p	Sqstm1	0	0
mmu-miR-6928-5p	Sqstm1	0	0
mmu-miR-6930-5p	Sqstm1	0	0
mmu-miR-6930-5p	Sqstm1	0	0
mmu-miR-6931-5p	Sqstm1	0	0
mmu-miR-6932-3p	Sqstm1	0	0
mmu-miR-6937-5p	Sqstm1	0	0
mmu-miR-6938-3p	Sqstm1	0	0
mmu-miR-6942-5p	Sqstm1	0	0
mmu-miR-6954-5p	Sqstm1	0	0
mmu-miR-6964-3p	Sqstm1	0	0
mmu-miR-6973a-5p	Sqstm1	0	0
mmu-miR-6975-5p	Sqstm1	0	0
mmu-miR-6979-3p	Sqstm1	0	0
mmu-miR-6980-5p	Sqstm1	0	0
mmu-miR-6987-3p	Sqstm1	0	0
mmu-miR-6990-3p	Sqstm1	0	0
mmu-miR-6991-5p	Sqstm1	0	0
mmu-miR-6994-5p	Sqstm1	0	0
mmu-miR-6995-5p	Sqstm1	0	0
mmu-miR-6997-5p	Sqstm1	0	0
mmu-miR-7000-5p	Sqstm1	0	0
mmu-miR-7000-3p	Sqstm1	0	0
mmu-miR-7003-5p	Sqstm1	0	0
mmu-miR-7005-3p	Sqstm1	0	0
mmu-miR-7009-5p	Sqstm1	0	0
mmu-miR-7018-3p	Sqstm1	0	0
mmu-miR-7023-5p	Sqstm1	0	0
mmu-miR-7023-3p	Sqstm1	0	0
mmu-miR-7024-5p	Sqstm1	0	0
mmu-miR-7029-5p	Sqstm1	0	0
mmu-miR-7031-5p	Sqstm1	0	0
mmu-miR-7033-3p	Sqstm1	0	0
mmu-miR-7038-3p	Sqstm1	0	0
mmu-miR-7040-5p	Sqstm1	0	0
mmu-miR-7043-5p	Sqstm1	0	0
mmu-miR-7043-3p	Sqstm1	0	0
mmu-miR-7044-5p	Sqstm1	0	0
mmu-miR-7045-5p	Sqstm1	0	0
mmu-miR-7045-5p	Sqstm1	0	0
mmu-miR-7050-5p	Sqstm1	0	0
mmu-miR-7050-5p	Sqstm1	0	0
mmu-miR-7052-5p	Sqstm1	0	0
mmu-miR-7066-5p	Sqstm1	0	0
mmu-miR-7067-5p	Sqstm1	0	0
mmu-miR-6769b-5p	Sqstm1	0	0
mmu-miR-7076-5p	Sqstm1	0	0
mmu-miR-7078-5p	Sqstm1	0	0
mmu-miR-7087-5p	Sqstm1	0	0
mmu-miR-7094-1-5p	Sqstm1	0	0
mmu-miR-7094-3p	Sqstm1	0	0
mmu-miR-7115-5p	Sqstm1	0	0
mmu-miR-7117-5p	Sqstm1	0	0
mmu-miR-7118-5p	Sqstm1	0	0
mmu-miR-7213-5p	Sqstm1	0	0
mmu-miR-7222-3p	Sqstm1	0	0
mmu-miR-7222-3p	Sqstm1	0	0
mmu-miR-7236-5p	Sqstm1	0	0
mmu-miR-7239-3p	Sqstm1	0	0
mmu-miR-7665-5p	Sqstm1	0	0
mmu-miR-1191b-3p	Sqstm1	0	0
mmu-miR-3620-5p	Sqstm1	0	0
mmu-miR-7682-5p	Sqstm1	0	0
mmu-miR-7683-5p	Sqstm1	0	0
mmu-miR-1258-3p	Sqstm1	0	0
mmu-miR-8091	Sqstm1	0	0
mmu-miR-8104	Sqstm1	0	0
mmu-miR-8110	Sqstm1	0	0
mmu-miR-8113	Sqstm1	0	0
mmu-miR-12181-5p	Sqstm1	0	0
mmu-miR-12182-3p	Sqstm1	0	0
mmu-miR-12184-5p	Sqstm1	0	0
mmu-miR-12201-3p	Sqstm1	0	0
mmu-miR-449b	Hif1a	0	0
mmu-miR-6936-5p	Hif1a	0	0
mmu-miR-5104b-5p	Hif1a	0	0
mmu-miR-449b	Hif1a	0	0
mmu-miR-5104b-5p	Hif1a	0	0
mmu-miR-326-3p	Hif1a	0	0
mmu-miR-3470a	Hif1a	0	0
mmu-miR-3470a	Hif1a	0	0
mmu-miR-6351	Hif1a	0	0
mmu-miR-6351	Hif1a	0	0
mmu-miR-3091-3p	Hif1a	0	0
mmu-miR-7035-3p	Hif1a	0	0
mmu-let-7i-5p	Hif1a	0	0
mmu-miR-99a-3p	Hif1a	0	0
mmu-miR-125a-5p	Hif1a	0	0
mmu-miR-125a-3p	Hif1a	0	0
mmu-miR-125b-2-3p	Hif1a	0	0
mmu-miR-134-5p	Hif1a	0	0
mmu-miR-134-3p	Hif1a	0	0
mmu-miR-150-3p	Hif1a	0	0
mmu-miR-153-5p	Hif1a	0	0
mmu-miR-182-3p	Hif1a	0	0
mmu-miR-187-3p	Hif1a	0	0
mmu-miR-295-3p	Hif1a	0	0
mmu-miR-296-3p	Hif1a	0	0
mmu-miR-106b-3p	Hif1a	0	0
mmu-miR-148a-5p	Hif1a	0	0
mmu-miR-192-5p	Hif1a	0	0
mmu-let-7a-2-3p	Hif1a	0	0
mmu-miR-93-3p	Hif1a	0	0
mmu-miR-34a-5p	Hif1a	0	0
mmu-miR-103-3p	Hif1a	0	0
mmu-miR-331-5p	Hif1a	0	0
mmu-miR-337-5p	Hif1a	0	0
mmu-miR-351-3p	Hif1a	0	0
mmu-miR-101b-5p	Hif1a	0	0
mmu-miR-107-3p	Hif1a	0	0
mmu-miR-28a-3p	Hif1a	0	0
mmu-miR-100-3p	Hif1a	0	0
mmu-miR-214-3p	Hif1a	0	0
mmu-miR-218-5p	Hif1a	0	0
mmu-miR-33-5p	Hif1a	0	0
mmu-miR-211-3p	Hif1a	0	0
mmu-miR-128-2-5p	Hif1a	0	0
mmu-miR-215-3p	Hif1a	0	0
mmu-miR-384-5p	Hif1a	0	0
mmu-miR-485-5p	Hif1a	0	0
mmu-miR-541-5p	Hif1a	0	0
mmu-miR-301b-3p	Hif1a	0	0
mmu-miR-665-3p	Hif1a	0	0
mmu-miR-667-3p	Hif1a	0	0
mmu-miR-770-5p	Hif1a	0	0
mmu-miR-770-3p	Hif1a	0	0
mmu-miR-761	Hif1a	0	0
mmu-miR-761	Hif1a	0	0
mmu-miR-3058-5p	Hif1a	0	0
mmu-miR-673-5p	Hif1a	0	0
mmu-miR-673-3p	Hif1a	0	0
mmu-miR-677-3p	Hif1a	0	0
mmu-miR-680	Hif1a	0	0
mmu-miR-449c-5p	Hif1a	0	0
mmu-miR-693-3p	Hif1a	0	0
mmu-miR-693-3p	Hif1a	0	0
mmu-miR-146b-5p	Hif1a	0	0
mmu-miR-698-5p	Hif1a	0	0
mmu-miR-700-3p	Hif1a	0	0
mmu-miR-702-5p	Hif1a	0	0
mmu-miR-704	Hif1a	0	0
mmu-miR-707	Hif1a	0	0
mmu-miR-450b-5p	Hif1a	0	0
mmu-miR-615-5p	Hif1a	0	0
mmu-miR-871-5p	Hif1a	0	0
mmu-miR-465b-5p	Hif1a	0	0
mmu-miR-465c-5p	Hif1a	0	0
mmu-miR-466f-5p	Hif1a	0	0
mmu-miR-873a-5p	Hif1a	0	0
mmu-miR-873a-3p	Hif1a	0	0
mmu-miR-598-5p	Hif1a	0	0
mmu-miR-669h-5p	Hif1a	0	0
mmu-miR-1198-5p	Hif1a	0	0
mmu-miR-1906	Hif1a	0	0
mmu-miR-1893	Hif1a	0	0
mmu-miR-1901	Hif1a	0	0
mmu-miR-1306-3p	Hif1a	0	0
mmu-miR-669o-5p	Hif1a	0	0
mmu-miR-1962	Hif1a	0	0
mmu-miR-2136	Hif1a	0	0
mmu-miR-2861	Hif1a	0	0
mmu-miR-3072-5p	Hif1a	0	0
mmu-miR-3085-5p	Hif1a	0	0
mmu-miR-466n-5p	Hif1a	0	0
mmu-miR-3095-5p	Hif1a	0	0
mmu-miR-3097-5p	Hif1a	0	0
mmu-miR-344e-5p	Hif1a	0	0
mmu-miR-344g-3p	Hif1a	0	0
mmu-miR-344g-3p	Hif1a	0	0
mmu-miR-3102-5p.2-5p	Hif1a	0	0
mmu-miR-3109-5p	Hif1a	0	0
mmu-miR-3109-3p	Hif1a	0	0
mmu-miR-3470b	Hif1a	0	0
mmu-miR-3474	Hif1a	0	0
mmu-miR-5104	Hif1a	0	0
mmu-miR-5107-3p	Hif1a	0	0
mmu-miR-5112	Hif1a	0	0
mmu-miR-5120	Hif1a	0	0
mmu-miR-5122	Hif1a	0	0
mmu-miR-3544-5p	Hif1a	0	0
mmu-miR-5616-3p	Hif1a	0	0
mmu-miR-5617-3p	Hif1a	0	0
mmu-miR-5623-3p	Hif1a	0	0
mmu-miR-344h-5p	Hif1a	0	0
mmu-miR-6244	Hif1a	0	0
mmu-miR-6337	Hif1a	0	0
mmu-miR-6343	Hif1a	0	0
mmu-miR-6345	Hif1a	0	0
mmu-miR-6349	Hif1a	0	0
mmu-miR-6359	Hif1a	0	0
mmu-miR-6378	Hif1a	0	0
mmu-miR-6386	Hif1a	0	0
mmu-miR-6399	Hif1a	0	0
mmu-miR-6416-5p	Hif1a	0	0
mmu-miR-6538	Hif1a	0	0
mmu-miR-6539	Hif1a	0	0
mmu-miR-6897-5p	Hif1a	0	0
mmu-miR-6909-5p	Hif1a	0	0
mmu-miR-6914-5p	Hif1a	0	0
mmu-miR-6918-3p	Hif1a	0	0
mmu-miR-6921-5p	Hif1a	0	0
mmu-miR-6932-3p	Hif1a	0	0
mmu-miR-6934-5p	Hif1a	0	0
mmu-miR-6935-5p	Hif1a	0	0
mmu-miR-6935-5p	Hif1a	0	0
mmu-miR-6935-5p	Hif1a	0	0
mmu-miR-6936-3p	Hif1a	0	0
mmu-miR-6937-5p	Hif1a	0	0
mmu-miR-6952-3p	Hif1a	0	0
mmu-miR-6955-5p	Hif1a	0	0
mmu-miR-6958-3p	Hif1a	0	0
mmu-miR-6960-5p	Hif1a	0	0
mmu-miR-6967-5p	Hif1a	0	0
mmu-miR-6972-5p	Hif1a	0	0
mmu-miR-6977-5p	Hif1a	0	0
mmu-miR-6977-3p	Hif1a	0	0
mmu-miR-7000-5p	Hif1a	0	0
mmu-miR-7008-5p	Hif1a	0	0
mmu-miR-7017-5p	Hif1a	0	0
mmu-miR-7019-5p	Hif1a	0	0
mmu-miR-7022-3p	Hif1a	0	0
mmu-miR-7025-3p	Hif1a	0	0
mmu-miR-7026-5p	Hif1a	0	0
mmu-miR-7026-3p	Hif1a	0	0
mmu-miR-7027-5p	Hif1a	0	0
mmu-miR-7034-5p	Hif1a	0	0
mmu-miR-7039-3p	Hif1a	0	0
mmu-miR-7060-5p	Hif1a	0	0
mmu-miR-6769b-5p	Hif1a	0	0
mmu-miR-7069-5p	Hif1a	0	0
mmu-miR-7072-3p	Hif1a	0	0
mmu-miR-7080-5p	Hif1a	0	0
mmu-miR-7085-5p	Hif1a	0	0
mmu-miR-7088-5p	Hif1a	0	0
mmu-miR-7115-5p	Hif1a	0	0
mmu-miR-7214-3p	Hif1a	0	0
mmu-miR-7222-3p	Hif1a	0	0
mmu-miR-7226-3p	Hif1a	0	0
mmu-miR-7230-5p	Hif1a	0	0
mmu-miR-7235-5p	Hif1a	0	0
mmu-miR-7239-5p	Hif1a	0	0
mmu-miR-7648-3p	Hif1a	0	0
mmu-miR-7036b-3p	Hif1a	0	0
mmu-miR-7654-3p	Hif1a	0	0
mmu-miR-7660-5p	Hif1a	0	0
mmu-miR-7667-3p	Hif1a	0	0
mmu-miR-7670-5p	Hif1a	0	0
mmu-miR-7672-3p	Hif1a	0	0
mmu-miR-129b-3p	Hif1a	0	0
mmu-miR-7677-3p	Hif1a	0	0
mmu-miR-7688-3p	Hif1a	0	0
mmu-miR-8093	Hif1a	0	0
mmu-miR-8093	Hif1a	0	0
mmu-miR-8098	Hif1a	0	0
mmu-miR-8101	Hif1a	0	0
mmu-miR-8109	Hif1a	0	0
mmu-miR-3154	Hif1a	0	0
mmu-miR-9718	Hif1a	0	0
mmu-miR-9769-5p	Hif1a	0	0
mmu-miR-12178-5p	Hif1a	0	0
mmu-miR-12178-3p	Hif1a	0	0
mmu-miR-12180-3p	Hif1a	0	0
mmu-miR-12184-5p	Hif1a	0	0
mmu-miR-12191-3p	Hif1a	0	0
mmu-miR-12202-5p	Hif1a	0	0
mmu-let-7i-5p	Hif1a	0	0
mmu-miR-99a-3p	Hif1a	0	0
mmu-miR-125a-5p	Hif1a	0	0
mmu-miR-125b-2-3p	Hif1a	0	0
mmu-miR-134-5p	Hif1a	0	0
mmu-miR-153-5p	Hif1a	0	0
mmu-miR-182-3p	Hif1a	0	0
mmu-miR-295-3p	Hif1a	0	0
mmu-miR-296-3p	Hif1a	0	0
mmu-miR-106b-3p	Hif1a	0	0
mmu-miR-148a-5p	Hif1a	0	0
mmu-miR-192-5p	Hif1a	0	0
mmu-let-7a-2-3p	Hif1a	0	0
mmu-miR-93-3p	Hif1a	0	0
mmu-miR-34a-5p	Hif1a	0	0
mmu-miR-103-3p	Hif1a	0	0
mmu-miR-331-5p	Hif1a	0	0
mmu-miR-337-5p	Hif1a	0	0
mmu-miR-101b-5p	Hif1a	0	0
mmu-miR-107-3p	Hif1a	0	0
mmu-miR-28a-3p	Hif1a	0	0
mmu-miR-100-3p	Hif1a	0	0
mmu-miR-214-3p	Hif1a	0	0
mmu-miR-218-5p	Hif1a	0	0
mmu-miR-33-5p	Hif1a	0	0
mmu-miR-128-2-5p	Hif1a	0	0
mmu-miR-215-3p	Hif1a	0	0
mmu-miR-384-5p	Hif1a	0	0
mmu-miR-541-5p	Hif1a	0	0
mmu-miR-301b-3p	Hif1a	0	0
mmu-miR-665-3p	Hif1a	0	0
mmu-miR-667-3p	Hif1a	0	0
mmu-miR-770-3p	Hif1a	0	0
mmu-miR-761	Hif1a	0	0
mmu-miR-761	Hif1a	0	0
mmu-miR-677-3p	Hif1a	0	0
mmu-miR-680	Hif1a	0	0
mmu-miR-693-3p	Hif1a	0	0
mmu-miR-693-3p	Hif1a	0	0
mmu-miR-146b-5p	Hif1a	0	0
mmu-miR-700-3p	Hif1a	0	0
mmu-miR-704	Hif1a	0	0
mmu-miR-450b-5p	Hif1a	0	0
mmu-miR-871-5p	Hif1a	0	0
mmu-miR-465b-5p	Hif1a	0	0
mmu-miR-465c-5p	Hif1a	0	0
mmu-miR-873a-5p	Hif1a	0	0
mmu-miR-873a-3p	Hif1a	0	0
mmu-miR-669o-5p	Hif1a	0	0
mmu-miR-1962	Hif1a	0	0
mmu-miR-2136	Hif1a	0	0
mmu-miR-3085-5p	Hif1a	0	0
mmu-miR-466n-5p	Hif1a	0	0
mmu-miR-3095-5p	Hif1a	0	0
mmu-miR-3097-5p	Hif1a	0	0
mmu-miR-344g-3p	Hif1a	0	0
mmu-miR-344g-3p	Hif1a	0	0
mmu-miR-3102-5p.2-5p	Hif1a	0	0
mmu-miR-3109-5p	Hif1a	0	0
mmu-miR-3109-3p	Hif1a	0	0
mmu-miR-3470b	Hif1a	0	0
mmu-miR-5107-3p	Hif1a	0	0
mmu-miR-5112	Hif1a	0	0
mmu-miR-5120	Hif1a	0	0
mmu-miR-3544-5p	Hif1a	0	0
mmu-miR-5617-3p	Hif1a	0	0
mmu-miR-5623-3p	Hif1a	0	0
mmu-miR-6244	Hif1a	0	0
mmu-miR-6343	Hif1a	0	0
mmu-miR-6345	Hif1a	0	0
mmu-miR-6359	Hif1a	0	0
mmu-miR-6378	Hif1a	0	0
mmu-miR-6386	Hif1a	0	0
mmu-miR-6399	Hif1a	0	0
mmu-miR-6416-5p	Hif1a	0	0
mmu-miR-6539	Hif1a	0	0
mmu-miR-6897-5p	Hif1a	0	0
mmu-miR-6909-5p	Hif1a	0	0
mmu-miR-6909-5p	Hif1a	0	0
mmu-miR-6914-5p	Hif1a	0	0
mmu-miR-6918-3p	Hif1a	0	0
mmu-miR-6932-3p	Hif1a	0	0
mmu-miR-6952-3p	Hif1a	0	0
mmu-miR-6955-5p	Hif1a	0	0
mmu-miR-6960-5p	Hif1a	0	0
mmu-miR-6967-5p	Hif1a	0	0
mmu-miR-6977-3p	Hif1a	0	0
mmu-miR-7000-5p	Hif1a	0	0
mmu-miR-7008-5p	Hif1a	0	0
mmu-miR-7017-5p	Hif1a	0	0
mmu-miR-7025-3p	Hif1a	0	0
mmu-miR-7026-5p	Hif1a	0	0
mmu-miR-7027-5p	Hif1a	0	0
mmu-miR-7060-5p	Hif1a	0	0
mmu-miR-7069-5p	Hif1a	0	0
mmu-miR-7072-3p	Hif1a	0	0
mmu-miR-7080-5p	Hif1a	0	0
mmu-miR-7085-5p	Hif1a	0	0
mmu-miR-7226-3p	Hif1a	0	0
mmu-miR-7230-5p	Hif1a	0	0
mmu-miR-7235-5p	Hif1a	0	0
mmu-miR-7660-5p	Hif1a	0	0
mmu-miR-7667-3p	Hif1a	0	0
mmu-miR-7670-5p	Hif1a	0	0
mmu-miR-129b-3p	Hif1a	0	0
mmu-miR-7688-3p	Hif1a	0	0
mmu-miR-8093	Hif1a	0	0
mmu-miR-8093	Hif1a	0	0
mmu-miR-8101	Hif1a	0	0
mmu-miR-9718	Hif1a	0	0
mmu-miR-9769-5p	Hif1a	0	0
mmu-miR-12178-5p	Hif1a	0	0
mmu-miR-12178-3p	Hif1a	0	0
mmu-miR-12180-3p	Hif1a	0	0
mmu-miR-12184-5p	Hif1a	0	0
mmu-miR-12191-3p	Hif1a	0	0
mmu-miR-12202-5p	Hif1a	0	0
mmu-miR-2861	Zfyve1	0	0
mmu-miR-7003-3p	Zfyve1	0	0
mmu-miR-2861	Zfyve1	0	0
mmu-miR-7003-3p	Zfyve1	0	0
mmu-miR-149-3p	Zfyve1	0	0
mmu-miR-7014-5p	Zfyve1	0	0
mmu-miR-134-3p	Zfyve1	0	0
mmu-miR-449a-3p	Zfyve1	0	0
mmu-miR-327	Zfyve1	0	0
mmu-miR-873a-3p	Zfyve1	0	0
mmu-miR-3620-3p	Zfyve1	0	0
mmu-miR-7689-5p	Zfyve1	0	0
mmu-miR-24-3p	Zfyve1	0	0
mmu-miR-677-5p	Zfyve1	0	0
mmu-miR-1964-3p	Zfyve1	0	0
mmu-miR-3103-3p	Zfyve1	0	0
mmu-miR-6418-5p	Zfyve1	0	0
mmu-miR-6978-3p	Zfyve1	0	0
mmu-miR-1964-3p	Zfyve1	0	0
mmu-miR-6978-3p	Zfyve1	0	0
mmu-miR-466h-3p	Zfyve1	0	0
mmu-miR-6931-5p	Zfyve1	0	0
mmu-miR-331-3p	Zfyve1	0	0
mmu-miR-331-3p	Zfyve1	0	0
mmu-miR-6980-3p	Zfyve1	0	0
mmu-miR-6980-3p	Zfyve1	0	0
mmu-miR-7662-5p	Zfyve1	0	0
mmu-let-7g-3p	Zfyve1	0	0
mmu-miR-134-3p	Zfyve1	0	0
mmu-miR-141-5p	Zfyve1	0	0
mmu-miR-150-5p	Zfyve1	0	0
mmu-miR-151-3p	Zfyve1	0	0
mmu-miR-155-3p	Zfyve1	0	0
mmu-miR-129-1-3p	Zfyve1	0	0
mmu-miR-185-3p	Zfyve1	0	0
mmu-miR-24-3p	Zfyve1	0	0
mmu-miR-200b-5p	Zfyve1	0	0
mmu-miR-201-3p	Zfyve1	0	0
mmu-miR-204-5p	Zfyve1	0	0
mmu-miR-143-5p	Zfyve1	0	0
mmu-miR-143-3p	Zfyve1	0	0
mmu-miR-291a-5p	Zfyve1	0	0
mmu-miR-291a-5p	Zfyve1	0	0
mmu-miR-292a-3p	Zfyve1	0	0
mmu-miR-296-3p	Zfyve1	0	0
mmu-miR-34b-3p	Zfyve1	0	0
mmu-let-7d-5p	Zfyve1	0	0
mmu-miR-106a-5p	Zfyve1	0	0
mmu-miR-130b-5p	Zfyve1	0	0
mmu-let-7b-5p	Zfyve1	0	0
mmu-let-7c-5p	Zfyve1	0	0
mmu-let-7c-5p	Zfyve1	0	0
mmu-miR-129-2-3p	Zfyve1	0	0
mmu-miR-103-2-5p	Zfyve1	0	0
mmu-miR-328-5p	Zfyve1	0	0
mmu-miR-328-3p	Zfyve1	0	0
mmu-miR-337-3p	Zfyve1	0	0
mmu-miR-345-5p	Zfyve1	0	0
mmu-miR-345-3p	Zfyve1	0	0
mmu-miR-346-5p	Zfyve1	0	0
mmu-miR-107-5p	Zfyve1	0	0
mmu-miR-107-3p	Zfyve1	0	0
mmu-miR-139-3p	Zfyve1	0	0
mmu-miR-214-3p	Zfyve1	0	0
mmu-miR-216a-3p	Zfyve1	0	0
mmu-miR-219a-1-3p	Zfyve1	0	0
mmu-miR-181c-5p	Zfyve1	0	0
mmu-miR-365-1-5p	Zfyve1	0	0
mmu-miR-409-3p	Zfyve1	0	0
mmu-miR-467a-5p	Zfyve1	0	0
mmu-miR-483-5p	Zfyve1	0	0
mmu-miR-540-5p	Zfyve1	0	0
mmu-miR-291b-5p	Zfyve1	0	0
mmu-miR-301b-5p	Zfyve1	0	0
mmu-miR-675-5p	Zfyve1	0	0
mmu-miR-1249-5p	Zfyve1	0	0
mmu-miR-665-5p	Zfyve1	0	0
mmu-miR-667-3p	Zfyve1	0	0
mmu-miR-762	Zfyve1	0	0
mmu-miR-762	Zfyve1	0	0
mmu-miR-344d-3p	Zfyve1	0	0
mmu-miR-802-3p	Zfyve1	0	0
mmu-miR-761	Zfyve1	0	0
mmu-miR-764-5p	Zfyve1	0	0
mmu-miR-423-5p	Zfyve1	0	0
mmu-miR-495-5p	Zfyve1	0	0
mmu-miR-467b-5p	Zfyve1	0	0
mmu-miR-701-5p	Zfyve1	0	0
mmu-miR-702-5p	Zfyve1	0	0
mmu-miR-709	Zfyve1	0	0
mmu-miR-709	Zfyve1	0	0
mmu-miR-712-5p	Zfyve1	0	0
mmu-miR-804	Zfyve1	0	0
mmu-miR-871-3p	Zfyve1	0	0
mmu-miR-880-3p	Zfyve1	0	0
mmu-miR-883a-5p	Zfyve1	0	0
mmu-miR-883b-5p	Zfyve1	0	0
mmu-miR-343	Zfyve1	0	0
mmu-miR-467c-5p	Zfyve1	0	0
mmu-miR-504-5p	Zfyve1	0	0
mmu-miR-504-3p	Zfyve1	0	0
mmu-miR-878-3p	Zfyve1	0	0
mmu-miR-873a-3p	Zfyve1	0	0
mmu-miR-1195	Zfyve1	0	0
mmu-miR-1198-3p	Zfyve1	0	0
mmu-miR-1199-5p	Zfyve1	0	0
mmu-miR-1897-5p	Zfyve1	0	0
mmu-miR-1897-5p	Zfyve1	0	0
mmu-miR-1899	Zfyve1	0	0
mmu-miR-1892	Zfyve1	0	0
mmu-miR-1898	Zfyve1	0	0
mmu-miR-1894-5p	Zfyve1	0	0
mmu-miR-1929-5p	Zfyve1	0	0
mmu-miR-1930-3p	Zfyve1	0	0
mmu-miR-1945	Zfyve1	0	0
mmu-miR-1951	Zfyve1	0	0
mmu-miR-1955-5p	Zfyve1	0	0
mmu-miR-1958	Zfyve1	0	0
mmu-miR-1966-5p	Zfyve1	0	0
mmu-miR-2183	Zfyve1	0	0
mmu-miR-664-5p	Zfyve1	0	0
mmu-miR-3060-5p	Zfyve1	0	0
mmu-miR-3062-3p	Zfyve1	0	0
mmu-miR-3066-5p	Zfyve1	0	0
mmu-miR-3068-5p	Zfyve1	0	0
mmu-miR-3072-5p	Zfyve1	0	0
mmu-miR-3075-3p	Zfyve1	0	0
mmu-miR-3076-5p	Zfyve1	0	0
mmu-miR-3078-3p	Zfyve1	0	0
mmu-miR-3079-5p	Zfyve1	0	0
mmu-miR-3081-3p	Zfyve1	0	0
mmu-miR-3089-5p	Zfyve1	0	0
mmu-miR-3091-3p	Zfyve1	0	0
mmu-miR-3098-5p	Zfyve1	0	0
mmu-miR-344e-5p	Zfyve1	0	0
mmu-miR-344c-5p	Zfyve1	0	0
mmu-miR-3102-3p.2-3p	Zfyve1	0	0
mmu-miR-3109-3p	Zfyve1	0	0
mmu-miR-3474	Zfyve1	0	0
mmu-miR-3960	Zfyve1	0	0
mmu-miR-3960	Zfyve1	0	0
mmu-miR-3971	Zfyve1	0	0
mmu-miR-5046	Zfyve1	0	0
mmu-miR-5113	Zfyve1	0	0
mmu-miR-5114	Zfyve1	0	0
mmu-miR-5123	Zfyve1	0	0
mmu-miR-5129-5p	Zfyve1	0	0
mmu-miR-5133	Zfyve1	0	0
mmu-miR-5134-5p	Zfyve1	0	0
mmu-miR-5622-5p	Zfyve1	0	0
mmu-miR-5622-3p	Zfyve1	0	0
mmu-miR-344h-5p	Zfyve1	0	0
mmu-miR-6236	Zfyve1	0	0
mmu-miR-6349	Zfyve1	0	0
mmu-miR-6352	Zfyve1	0	0
mmu-miR-6368	Zfyve1	0	0
mmu-miR-6372	Zfyve1	0	0
mmu-miR-6386	Zfyve1	0	0
mmu-miR-378c	Zfyve1	0	0
mmu-miR-6418-5p	Zfyve1	0	0
mmu-miR-6418-3p	Zfyve1	0	0
mmu-miR-873b	Zfyve1	0	0
mmu-miR-451b	Zfyve1	0	0
mmu-miR-6900-3p	Zfyve1	0	0
mmu-miR-6905-5p	Zfyve1	0	0
mmu-miR-6908-3p	Zfyve1	0	0
mmu-miR-6909-5p	Zfyve1	0	0
mmu-miR-6919-5p	Zfyve1	0	0
mmu-miR-6919-5p	Zfyve1	0	0
mmu-miR-6919-3p	Zfyve1	0	0
mmu-miR-6921-5p	Zfyve1	0	0
mmu-miR-6922-5p	Zfyve1	0	0
mmu-miR-6922-3p	Zfyve1	0	0
mmu-miR-6927-3p	Zfyve1	0	0
mmu-miR-6927-3p	Zfyve1	0	0
mmu-miR-6930-5p	Zfyve1	0	0
mmu-miR-6930-3p	Zfyve1	0	0
mmu-miR-6931-5p	Zfyve1	0	0
mmu-miR-6932-5p	Zfyve1	0	0
mmu-miR-6933-3p	Zfyve1	0	0
mmu-miR-6934-5p	Zfyve1	0	0
mmu-miR-6936-5p	Zfyve1	0	0
mmu-miR-6939-5p	Zfyve1	0	0
mmu-miR-6942-5p	Zfyve1	0	0
mmu-miR-6942-3p	Zfyve1	0	0
mmu-miR-6944-3p	Zfyve1	0	0
mmu-miR-6945-5p	Zfyve1	0	0
mmu-miR-6945-3p	Zfyve1	0	0
mmu-miR-6945-3p	Zfyve1	0	0
mmu-miR-6948-5p	Zfyve1	0	0
mmu-miR-6948-3p	Zfyve1	0	0
mmu-miR-6950-5p	Zfyve1	0	0
mmu-miR-6952-3p	Zfyve1	0	0
mmu-miR-6959-3p	Zfyve1	0	0
mmu-miR-6970-5p	Zfyve1	0	0
mmu-miR-6970-3p	Zfyve1	0	0
mmu-miR-6973a-5p	Zfyve1	0	0
mmu-miR-6973a-3p	Zfyve1	0	0
mmu-miR-6973a-3p	Zfyve1	0	0
mmu-miR-6974-5p	Zfyve1	0	0
mmu-miR-6976-3p	Zfyve1	0	0
mmu-miR-6977-5p	Zfyve1	0	0
mmu-miR-6978-5p	Zfyve1	0	0
mmu-miR-6979-5p	Zfyve1	0	0
mmu-miR-6985-5p	Zfyve1	0	0
mmu-miR-6986-5p	Zfyve1	0	0
mmu-miR-6987-5p	Zfyve1	0	0
mmu-miR-6987-5p	Zfyve1	0	0
mmu-miR-6989-5p	Zfyve1	0	0
mmu-miR-6993-5p	Zfyve1	0	0
mmu-miR-6994-5p	Zfyve1	0	0
mmu-miR-6995-5p	Zfyve1	0	0
mmu-miR-6996-3p	Zfyve1	0	0
mmu-miR-6998-5p	Zfyve1	0	0
mmu-miR-6998-5p	Zfyve1	0	0
mmu-miR-7000-5p	Zfyve1	0	0
mmu-miR-7001-5p	Zfyve1	0	0
mmu-miR-6973b-5p	Zfyve1	0	0
mmu-miR-6973b-3p	Zfyve1	0	0
mmu-miR-7004-3p	Zfyve1	0	0
mmu-miR-7006-3p	Zfyve1	0	0
mmu-miR-7007-5p	Zfyve1	0	0
mmu-miR-7011-5p	Zfyve1	0	0
mmu-miR-7016-5p	Zfyve1	0	0
mmu-miR-7019-5p	Zfyve1	0	0
mmu-miR-7022-3p	Zfyve1	0	0
mmu-miR-7031-5p	Zfyve1	0	0
mmu-miR-7031-3p	Zfyve1	0	0
mmu-miR-7038-3p	Zfyve1	0	0
mmu-miR-7039-3p	Zfyve1	0	0
mmu-miR-7050-5p	Zfyve1	0	0
mmu-miR-7051-3p	Zfyve1	0	0
mmu-miR-7056-5p	Zfyve1	0	0
mmu-miR-7063-5p	Zfyve1	0	0
mmu-miR-7063-3p	Zfyve1	0	0
mmu-miR-7069-3p	Zfyve1	0	0
mmu-miR-7070-3p	Zfyve1	0	0
mmu-miR-7071-5p	Zfyve1	0	0
mmu-miR-7072-5p	Zfyve1	0	0
mmu-miR-7073-5p	Zfyve1	0	0
mmu-miR-7076-3p	Zfyve1	0	0
mmu-miR-7080-3p	Zfyve1	0	0
mmu-miR-7083-5p	Zfyve1	0	0
mmu-miR-7083-3p	Zfyve1	0	0
mmu-miR-7087-3p	Zfyve1	0	0
mmu-miR-7094-1-5p	Zfyve1	0	0
mmu-miR-7117-3p	Zfyve1	0	0
mmu-miR-7211-5p	Zfyve1	0	0
mmu-miR-7213-5p	Zfyve1	0	0
mmu-miR-7215-5p	Zfyve1	0	0
mmu-miR-7218-5p	Zfyve1	0	0
mmu-miR-7224-3p	Zfyve1	0	0
mmu-miR-7225-3p	Zfyve1	0	0
mmu-miR-7226-3p	Zfyve1	0	0
mmu-miR-7227-3p	Zfyve1	0	0
mmu-miR-7231-5p	Zfyve1	0	0
mmu-miR-7235-5p	Zfyve1	0	0
mmu-miR-7646-3p	Zfyve1	0	0
mmu-miR-7647-3p	Zfyve1	0	0
mmu-miR-7667-3p	Zfyve1	0	0
mmu-miR-7668-3p	Zfyve1	0	0
mmu-miR-7670-5p	Zfyve1	0	0
mmu-miR-3569-5p	Zfyve1	0	0
mmu-miR-129b-5p	Zfyve1	0	0
mmu-miR-129b-5p	Zfyve1	0	0
mmu-miR-292b-5p	Zfyve1	0	0
mmu-miR-3620-3p	Zfyve1	0	0
mmu-miR-7681-5p	Zfyve1	0	0
mmu-miR-7681-3p	Zfyve1	0	0
mmu-miR-7681-3p	Zfyve1	0	0
mmu-miR-7684-5p	Zfyve1	0	0
mmu-miR-290b-5p	Zfyve1	0	0
mmu-miR-1258-3p	Zfyve1	0	0
mmu-miR-7243-5p	Zfyve1	0	0
mmu-miR-8091	Zfyve1	0	0
mmu-miR-8093	Zfyve1	0	0
mmu-miR-8095	Zfyve1	0	0
mmu-miR-8101	Zfyve1	0	0
mmu-miR-8108	Zfyve1	0	0
mmu-miR-8112	Zfyve1	0	0
mmu-miR-8116	Zfyve1	0	0
mmu-miR-3473g	Zfyve1	0	0
mmu-miR-3154	Zfyve1	0	0
mmu-miR-3552	Zfyve1	0	0
mmu-miR-9769-3p	Zfyve1	0	0
mmu-miR-12178-3p	Zfyve1	0	0
mmu-miR-12181-3p	Zfyve1	0	0
mmu-miR-12185-5p	Zfyve1	0	0
mmu-miR-12190-3p	Zfyve1	0	0
mmu-miR-12191-3p	Zfyve1	0	0
mmu-miR-12198-3p	Zfyve1	0	0
mmu-miR-12200-5p	Zfyve1	0	0
mmu-miR-12203-3p	Zfyve1	0	0
mmu-let-7g-3p	Zfyve1	0	0
mmu-let-7g-3p	Zfyve1	0	0
mmu-let-7i-5p	Zfyve1	0	0
mmu-miR-150-5p	Zfyve1	0	0
mmu-miR-151-3p	Zfyve1	0	0
mmu-miR-154-3p	Zfyve1	0	0
mmu-miR-155-3p	Zfyve1	0	0
mmu-miR-10b-5p	Zfyve1	0	0
mmu-miR-200b-5p	Zfyve1	0	0
mmu-miR-201-3p	Zfyve1	0	0
mmu-miR-205-5p	Zfyve1	0	0
mmu-miR-143-3p	Zfyve1	0	0
mmu-miR-291a-5p	Zfyve1	0	0
mmu-miR-291a-5p	Zfyve1	0	0
mmu-miR-296-3p	Zfyve1	0	0
mmu-miR-34b-3p	Zfyve1	0	0
mmu-let-7d-5p	Zfyve1	0	0
mmu-miR-106a-5p	Zfyve1	0	0
mmu-miR-130b-5p	Zfyve1	0	0
mmu-let-7b-5p	Zfyve1	0	0
mmu-let-7c-5p	Zfyve1	0	0
mmu-miR-103-2-5p	Zfyve1	0	0
mmu-miR-328-5p	Zfyve1	0	0
mmu-miR-328-3p	Zfyve1	0	0
mmu-miR-346-5p	Zfyve1	0	0
mmu-miR-107-5p	Zfyve1	0	0
mmu-miR-10a-5p	Zfyve1	0	0
mmu-miR-139-3p	Zfyve1	0	0
mmu-miR-138-1-3p	Zfyve1	0	0
mmu-miR-181c-5p	Zfyve1	0	0
mmu-miR-128-2-5p	Zfyve1	0	0
mmu-miR-194-2-3p	Zfyve1	0	0
mmu-miR-194-2-3p	Zfyve1	0	0
mmu-miR-365-1-5p	Zfyve1	0	0
mmu-miR-409-3p	Zfyve1	0	0
mmu-miR-433-3p	Zfyve1	0	0
mmu-miR-466a-3p	Zfyve1	0	0
mmu-miR-467a-5p	Zfyve1	0	0
mmu-miR-467a-3p	Zfyve1	0	0
mmu-miR-483-5p	Zfyve1	0	0
mmu-miR-291b-5p	Zfyve1	0	0
mmu-miR-301b-5p	Zfyve1	0	0
mmu-miR-675-5p	Zfyve1	0	0
mmu-miR-675-3p	Zfyve1	0	0
mmu-miR-216b-3p	Zfyve1	0	0
mmu-miR-1249-5p	Zfyve1	0	0
mmu-miR-665-3p	Zfyve1	0	0
mmu-miR-762	Zfyve1	0	0
mmu-miR-802-3p	Zfyve1	0	0
mmu-miR-764-5p	Zfyve1	0	0
mmu-miR-3059-5p	Zfyve1	0	0
mmu-miR-423-5p	Zfyve1	0	0
mmu-miR-423-5p	Zfyve1	0	0
mmu-miR-495-5p	Zfyve1	0	0
mmu-miR-683	Zfyve1	0	0
mmu-miR-691	Zfyve1	0	0
mmu-miR-669b-3p	Zfyve1	0	0
mmu-miR-467b-5p	Zfyve1	0	0
mmu-miR-669c-3p	Zfyve1	0	0
mmu-miR-455-5p	Zfyve1	0	0
mmu-miR-701-5p	Zfyve1	0	0
mmu-miR-702-5p	Zfyve1	0	0
mmu-miR-709	Zfyve1	0	0
mmu-miR-709	Zfyve1	0	0
mmu-miR-712-5p	Zfyve1	0	0
mmu-miR-804	Zfyve1	0	0
mmu-miR-871-3p	Zfyve1	0	0
mmu-miR-880-3p	Zfyve1	0	0
mmu-miR-883a-5p	Zfyve1	0	0
mmu-miR-883b-5p	Zfyve1	0	0
mmu-miR-327	Zfyve1	0	0
mmu-miR-466b-3p	Zfyve1	0	0
mmu-miR-466c-3p	Zfyve1	0	0
mmu-miR-466e-3p	Zfyve1	0	0
mmu-miR-466f-3p	Zfyve1	0	0
mmu-miR-504-5p	Zfyve1	0	0
mmu-miR-504-3p	Zfyve1	0	0
mmu-miR-466d-3p	Zfyve1	0	0
mmu-miR-878-3p	Zfyve1	0	0
mmu-miR-669k-3p	Zfyve1	0	0
mmu-miR-669d-3p	Zfyve1	0	0
mmu-miR-466i-3p	Zfyve1	0	0
mmu-miR-467f	Zfyve1	0	0
mmu-miR-1195	Zfyve1	0	0
mmu-miR-1897-5p	Zfyve1	0	0
mmu-miR-1899	Zfyve1	0	0
mmu-miR-1892	Zfyve1	0	0
mmu-miR-1896	Zfyve1	0	0
mmu-miR-1898	Zfyve1	0	0
mmu-miR-1894-5p	Zfyve1	0	0
mmu-miR-1894-3p	Zfyve1	0	0
mmu-miR-1929-5p	Zfyve1	0	0
mmu-miR-1933-3p	Zfyve1	0	0
mmu-miR-669m-3p	Zfyve1	0	0
mmu-miR-1951	Zfyve1	0	0
mmu-miR-1955-5p	Zfyve1	0	0
mmu-miR-1981-3p	Zfyve1	0	0
mmu-miR-432	Zfyve1	0	0
mmu-miR-664-5p	Zfyve1	0	0
mmu-miR-3060-5p	Zfyve1	0	0
mmu-miR-3064-3p	Zfyve1	0	0
mmu-miR-3066-5p	Zfyve1	0	0
mmu-miR-3068-5p	Zfyve1	0	0
mmu-miR-3070-3p	Zfyve1	0	0
mmu-miR-3070-2-3p	Zfyve1	0	0
mmu-miR-3072-5p	Zfyve1	0	0
mmu-miR-3072-5p	Zfyve1	0	0
mmu-miR-3075-3p	Zfyve1	0	0
mmu-miR-3076-5p	Zfyve1	0	0
mmu-miR-3078-3p	Zfyve1	0	0
mmu-miR-466m-3p	Zfyve1	0	0
mmu-miR-466o-3p	Zfyve1	0	0
mmu-miR-669p-3p	Zfyve1	0	0
mmu-miR-466p-3p	Zfyve1	0	0
mmu-miR-3089-5p	Zfyve1	0	0
mmu-miR-3091-3p	Zfyve1	0	0
mmu-miR-3098-5p	Zfyve1	0	0
mmu-miR-344e-5p	Zfyve1	0	0
mmu-miR-3102-5p.2-5p	Zfyve1	0	0
mmu-miR-3109-3p	Zfyve1	0	0
mmu-miR-3112-5p	Zfyve1	0	0
mmu-miR-3474	Zfyve1	0	0
mmu-miR-3960	Zfyve1	0	0
mmu-miR-3960	Zfyve1	0	0
mmu-miR-3971	Zfyve1	0	0
mmu-miR-5107-5p	Zfyve1	0	0
mmu-miR-5113	Zfyve1	0	0
mmu-miR-5114	Zfyve1	0	0
mmu-miR-466q	Zfyve1	0	0
mmu-miR-5123	Zfyve1	0	0
mmu-miR-5129-5p	Zfyve1	0	0
mmu-miR-5133	Zfyve1	0	0
mmu-miR-5134-5p	Zfyve1	0	0
mmu-miR-5622-5p	Zfyve1	0	0
mmu-miR-344h-5p	Zfyve1	0	0
mmu-miR-6349	Zfyve1	0	0
mmu-miR-6368	Zfyve1	0	0
mmu-miR-6372	Zfyve1	0	0
mmu-miR-6376	Zfyve1	0	0
mmu-miR-6384	Zfyve1	0	0
mmu-miR-6386	Zfyve1	0	0
mmu-miR-378c	Zfyve1	0	0
mmu-miR-6405	Zfyve1	0	0
mmu-miR-6415	Zfyve1	0	0
mmu-miR-6418-5p	Zfyve1	0	0
mmu-miR-873b	Zfyve1	0	0
mmu-miR-451b	Zfyve1	0	0
mmu-miR-3473e	Zfyve1	0	0
mmu-miR-6896-5p	Zfyve1	0	0
mmu-miR-6898-5p	Zfyve1	0	0
mmu-miR-6900-3p	Zfyve1	0	0
mmu-miR-6908-3p	Zfyve1	0	0
mmu-miR-6909-5p	Zfyve1	0	0
mmu-miR-6919-5p	Zfyve1	0	0
mmu-miR-6919-5p	Zfyve1	0	0
mmu-miR-6919-3p	Zfyve1	0	0
mmu-miR-6921-5p	Zfyve1	0	0
mmu-miR-6921-5p	Zfyve1	0	0
mmu-miR-6922-5p	Zfyve1	0	0
mmu-miR-6922-3p	Zfyve1	0	0
mmu-miR-6923-5p	Zfyve1	0	0
mmu-miR-6927-3p	Zfyve1	0	0
mmu-miR-6927-3p	Zfyve1	0	0
mmu-miR-6928-5p	Zfyve1	0	0
mmu-miR-6929-5p	Zfyve1	0	0
mmu-miR-6930-3p	Zfyve1	0	0
mmu-miR-6932-5p	Zfyve1	0	0
mmu-miR-6933-3p	Zfyve1	0	0
mmu-miR-6934-5p	Zfyve1	0	0
mmu-miR-6936-5p	Zfyve1	0	0
mmu-miR-6939-5p	Zfyve1	0	0
mmu-miR-6940-5p	Zfyve1	0	0
mmu-miR-6941-5p	Zfyve1	0	0
mmu-miR-6942-5p	Zfyve1	0	0
mmu-miR-6942-3p	Zfyve1	0	0
mmu-miR-6945-5p	Zfyve1	0	0
mmu-miR-6945-3p	Zfyve1	0	0
mmu-miR-6945-3p	Zfyve1	0	0
mmu-miR-6948-3p	Zfyve1	0	0
mmu-miR-6950-5p	Zfyve1	0	0
mmu-miR-6952-3p	Zfyve1	0	0
mmu-miR-6957-5p	Zfyve1	0	0
mmu-miR-6959-3p	Zfyve1	0	0
mmu-miR-6961-5p	Zfyve1	0	0
mmu-miR-6970-3p	Zfyve1	0	0
mmu-miR-6971-5p	Zfyve1	0	0
mmu-miR-6973a-3p	Zfyve1	0	0
mmu-miR-6973a-3p	Zfyve1	0	0
mmu-miR-6974-5p	Zfyve1	0	0
mmu-miR-6974-3p	Zfyve1	0	0
mmu-miR-6976-3p	Zfyve1	0	0
mmu-miR-6977-5p	Zfyve1	0	0
mmu-miR-6977-3p	Zfyve1	0	0
mmu-miR-6978-5p	Zfyve1	0	0
mmu-miR-6979-5p	Zfyve1	0	0
mmu-miR-6982-5p	Zfyve1	0	0
mmu-miR-6985-5p	Zfyve1	0	0
mmu-miR-6986-5p	Zfyve1	0	0
mmu-miR-6987-5p	Zfyve1	0	0
mmu-miR-6987-5p	Zfyve1	0	0
mmu-miR-6989-5p	Zfyve1	0	0
mmu-miR-6989-5p	Zfyve1	0	0
mmu-miR-6994-5p	Zfyve1	0	0
mmu-miR-6996-5p	Zfyve1	0	0
mmu-miR-6998-5p	Zfyve1	0	0
mmu-miR-6998-5p	Zfyve1	0	0
mmu-miR-7001-5p	Zfyve1	0	0
mmu-miR-6973b-5p	Zfyve1	0	0
mmu-miR-6973b-3p	Zfyve1	0	0
mmu-miR-7004-3p	Zfyve1	0	0
mmu-miR-7007-5p	Zfyve1	0	0
mmu-miR-7014-5p	Zfyve1	0	0
mmu-miR-7016-5p	Zfyve1	0	0
mmu-miR-7016-3p	Zfyve1	0	0
mmu-miR-7019-5p	Zfyve1	0	0
mmu-miR-7022-3p	Zfyve1	0	0
mmu-miR-7031-5p	Zfyve1	0	0
mmu-miR-7031-3p	Zfyve1	0	0
mmu-miR-7038-3p	Zfyve1	0	0
mmu-miR-7039-3p	Zfyve1	0	0
mmu-miR-7043-5p	Zfyve1	0	0
mmu-miR-7046-5p	Zfyve1	0	0
mmu-miR-7049-5p	Zfyve1	0	0
mmu-miR-7050-5p	Zfyve1	0	0
mmu-miR-7051-3p	Zfyve1	0	0
mmu-miR-7056-5p	Zfyve1	0	0
mmu-miR-7056-5p	Zfyve1	0	0
mmu-miR-7057-5p	Zfyve1	0	0
mmu-miR-7060-5p	Zfyve1	0	0
mmu-miR-7063-5p	Zfyve1	0	0
mmu-miR-7063-3p	Zfyve1	0	0
mmu-miR-6769b-3p	Zfyve1	0	0
mmu-miR-7069-3p	Zfyve1	0	0
mmu-miR-7070-5p	Zfyve1	0	0
mmu-miR-7070-3p	Zfyve1	0	0
mmu-miR-7071-5p	Zfyve1	0	0
mmu-miR-7072-5p	Zfyve1	0	0
mmu-miR-7073-5p	Zfyve1	0	0
mmu-miR-7076-3p	Zfyve1	0	0
mmu-miR-7079-3p	Zfyve1	0	0
mmu-miR-7080-3p	Zfyve1	0	0
mmu-miR-7081-3p	Zfyve1	0	0
mmu-miR-7082-5p	Zfyve1	0	0
mmu-miR-7083-5p	Zfyve1	0	0
mmu-miR-7087-3p	Zfyve1	0	0
mmu-miR-7094-1-5p	Zfyve1	0	0
mmu-miR-7117-3p	Zfyve1	0	0
mmu-miR-7118-5p	Zfyve1	0	0
mmu-miR-7211-5p	Zfyve1	0	0
mmu-miR-7213-5p	Zfyve1	0	0
mmu-miR-7215-5p	Zfyve1	0	0
mmu-miR-7218-5p	Zfyve1	0	0
mmu-miR-7222-5p	Zfyve1	0	0
mmu-miR-7224-3p	Zfyve1	0	0
mmu-miR-7225-3p	Zfyve1	0	0
mmu-miR-7227-3p	Zfyve1	0	0
mmu-miR-7231-5p	Zfyve1	0	0
mmu-miR-7646-3p	Zfyve1	0	0
mmu-miR-7647-3p	Zfyve1	0	0
mmu-miR-7647-3p	Zfyve1	0	0
mmu-miR-7668-3p	Zfyve1	0	0
mmu-miR-7670-5p	Zfyve1	0	0
mmu-miR-7672-3p	Zfyve1	0	0
mmu-miR-3569-5p	Zfyve1	0	0
mmu-miR-129b-5p	Zfyve1	0	0
mmu-miR-292b-5p	Zfyve1	0	0
mmu-miR-3620-3p	Zfyve1	0	0
mmu-miR-7681-3p	Zfyve1	0	0
mmu-miR-7681-3p	Zfyve1	0	0
mmu-miR-290b-3p	Zfyve1	0	0
mmu-miR-1258-3p	Zfyve1	0	0
mmu-miR-7243-5p	Zfyve1	0	0
mmu-miR-8093	Zfyve1	0	0
mmu-miR-8095	Zfyve1	0	0
mmu-miR-8101	Zfyve1	0	0
mmu-miR-8104	Zfyve1	0	0
mmu-miR-8108	Zfyve1	0	0
mmu-miR-8110	Zfyve1	0	0
mmu-miR-8112	Zfyve1	0	0
mmu-miR-8116	Zfyve1	0	0
mmu-miR-3473g	Zfyve1	0	0
mmu-miR-3154	Zfyve1	0	0
mmu-miR-3552	Zfyve1	0	0
mmu-miR-9769-3p	Zfyve1	0	0
mmu-miR-12181-3p	Zfyve1	0	0
mmu-miR-12185-5p	Zfyve1	0	0
mmu-miR-12198-3p	Zfyve1	0	0
mmu-miR-12200-5p	Zfyve1	0	0
mmu-miR-12201-3p	Zfyve1	0	0
mmu-miR-12203-3p	Zfyve1	0	0
mmu-miR-6979-5p	Gabarapl1	0	0
mmu-miR-185-5p	Gabarapl1	0	0
mmu-miR-370-3p	Gabarapl1	0	0
mmu-miR-425-3p	Gabarapl1	0	0
mmu-miR-485-3p	Gabarapl1	0	0
mmu-miR-873a-3p	Gabarapl1	0	0
mmu-miR-1948-3p	Gabarapl1	0	0
mmu-miR-3075-3p	Gabarapl1	0	0
mmu-miR-6349	Gabarapl1	0	0
mmu-miR-6934-3p	Gabarapl1	0	0
mmu-miR-6990-3p	Gabarapl1	0	0
mmu-miR-7088-5p	Gabarapl1	0	0
mmu-miR-7016-5p	Gabarapl1	0	0
mmu-miR-7023-5p	Gabarapl1	0	0
mmu-miR-7035-5p	Gabarapl1	0	0
mmu-miR-206-3p	Gabarapl1	0	0
mmu-miR-6982-3p	Gabarapl1	0	0
mmu-miR-7665-3p	Gabarapl1	0	0
mmu-miR-3620-5p	Gabarapl1	0	0
mmu-miR-681	Gabarapl1	0	0
mmu-miR-7075-5p	Gabarapl1	0	0
mmu-miR-7668-3p	Gabarapl1	0	0
mmu-miR-124-5p	Gabarapl1	0	0
mmu-miR-125a-5p	Gabarapl1	0	0
mmu-miR-125a-3p	Gabarapl1	0	0
mmu-miR-140-5p	Gabarapl1	0	0
mmu-miR-149-3p	Gabarapl1	0	0
mmu-miR-129-5p	Gabarapl1	0	0
mmu-miR-129-1-3p	Gabarapl1	0	0
mmu-miR-129-1-3p	Gabarapl1	0	0
mmu-miR-24-1-5p	Gabarapl1	0	0
mmu-miR-200b-5p	Gabarapl1	0	0
mmu-miR-205-5p	Gabarapl1	0	0
mmu-miR-296-3p	Gabarapl1	0	0
mmu-miR-298-5p	Gabarapl1	0	0
mmu-miR-298-3p	Gabarapl1	0	0
mmu-miR-302a-3p	Gabarapl1	0	0
mmu-miR-34b-3p	Gabarapl1	0	0
mmu-miR-106a-3p	Gabarapl1	0	0
mmu-let-7a-2-3p	Gabarapl1	0	0
mmu-let-7b-5p	Gabarapl1	0	0
mmu-miR-23a-5p	Gabarapl1	0	0
mmu-miR-129-2-3p	Gabarapl1	0	0
mmu-miR-129-2-3p	Gabarapl1	0	0
mmu-miR-323-5p	Gabarapl1	0	0
mmu-miR-324-3p	Gabarapl1	0	0
mmu-miR-326-3p	Gabarapl1	0	0
mmu-miR-339-5p	Gabarapl1	0	0
mmu-miR-339-5p	Gabarapl1	0	0
mmu-miR-17-5p	Gabarapl1	0	0
mmu-miR-17-3p	Gabarapl1	0	0
mmu-miR-139-5p	Gabarapl1	0	0
mmu-miR-212-5p	Gabarapl1	0	0
mmu-miR-212-3p	Gabarapl1	0	0
mmu-miR-218-2-3p	Gabarapl1	0	0
mmu-miR-219a-1-3p	Gabarapl1	0	0
mmu-miR-219a-1-3p	Gabarapl1	0	0
mmu-miR-320-5p	Gabarapl1	0	0
mmu-miR-320-3p	Gabarapl1	0	0
mmu-miR-211-3p	Gabarapl1	0	0
mmu-miR-92a-1-5p	Gabarapl1	0	0
mmu-miR-125b-1-3p	Gabarapl1	0	0
mmu-miR-7a-2-3p	Gabarapl1	0	0
mmu-miR-378a-5p	Gabarapl1	0	0
mmu-miR-452-3p	Gabarapl1	0	0
mmu-miR-483-5p	Gabarapl1	0	0
mmu-miR-484	Gabarapl1	0	0
mmu-miR-485-5p	Gabarapl1	0	0
mmu-miR-543-5p	Gabarapl1	0	0
mmu-miR-487b-5p	Gabarapl1	0	0
mmu-miR-487b-5p	Gabarapl1	0	0
mmu-miR-450a-2-3p	Gabarapl1	0	0
mmu-miR-291b-5p	Gabarapl1	0	0
mmu-miR-1224-3p	Gabarapl1	0	0
mmu-miR-1247-5p	Gabarapl1	0	0
mmu-miR-551b-5p	Gabarapl1	0	0
mmu-miR-1249-5p	Gabarapl1	0	0
mmu-miR-671-5p	Gabarapl1	0	0
mmu-miR-671-5p	Gabarapl1	0	0
mmu-miR-665-3p	Gabarapl1	0	0
mmu-miR-665-3p	Gabarapl1	0	0
mmu-miR-667-5p	Gabarapl1	0	0
mmu-miR-762	Gabarapl1	0	0
mmu-miR-672-5p	Gabarapl1	0	0
mmu-miR-672-5p	Gabarapl1	0	0
mmu-miR-761	Gabarapl1	0	0
mmu-miR-3059-5p	Gabarapl1	0	0
mmu-miR-3058-3p	Gabarapl1	0	0
mmu-miR-3099-5p	Gabarapl1	0	0
mmu-miR-3099-3p	Gabarapl1	0	0
mmu-miR-669a-3p	Gabarapl1	0	0
mmu-miR-666-5p	Gabarapl1	0	0
mmu-miR-673-3p	Gabarapl1	0	0
mmu-miR-678	Gabarapl1	0	0
mmu-miR-423-5p	Gabarapl1	0	0
mmu-miR-423-5p	Gabarapl1	0	0
mmu-miR-679-5p	Gabarapl1	0	0
mmu-miR-679-3p	Gabarapl1	0	0
mmu-miR-669c-3p	Gabarapl1	0	0
mmu-miR-698-5p	Gabarapl1	0	0
mmu-miR-700-5p	Gabarapl1	0	0
mmu-miR-702-5p	Gabarapl1	0	0
mmu-miR-707	Gabarapl1	0	0
mmu-miR-709	Gabarapl1	0	0
mmu-miR-676-3p	Gabarapl1	0	0
mmu-miR-615-3p	Gabarapl1	0	0
mmu-miR-804	Gabarapl1	0	0
mmu-miR-743a-5p	Gabarapl1	0	0
mmu-miR-880-3p	Gabarapl1	0	0
mmu-miR-880-3p	Gabarapl1	0	0
mmu-miR-883a-5p	Gabarapl1	0	0
mmu-miR-18b-3p	Gabarapl1	0	0
mmu-miR-466f-5p	Gabarapl1	0	0
mmu-miR-466g	Gabarapl1	0	0
mmu-miR-467d-5p	Gabarapl1	0	0
mmu-miR-493-3p	Gabarapl1	0	0
mmu-miR-504-3p	Gabarapl1	0	0
mmu-miR-574-5p	Gabarapl1	0	0
mmu-miR-654-3p	Gabarapl1	0	0
mmu-miR-92b-5p	Gabarapl1	0	0
mmu-miR-92b-3p	Gabarapl1	0	0
mmu-miR-466d-5p	Gabarapl1	0	0
mmu-miR-449b	Gabarapl1	0	0
mmu-miR-877-5p	Gabarapl1	0	0
mmu-miR-877-3p	Gabarapl1	0	0
mmu-miR-466i-5p	Gabarapl1	0	0
mmu-miR-669f-3p	Gabarapl1	0	0
mmu-miR-1198-5p	Gabarapl1	0	0
mmu-miR-1199-5p	Gabarapl1	0	0
mmu-miR-1199-3p	Gabarapl1	0	0
mmu-miR-1902	Gabarapl1	0	0
mmu-miR-1903	Gabarapl1	0	0
mmu-miR-1892	Gabarapl1	0	0
mmu-miR-1892	Gabarapl1	0	0
mmu-miR-1906	Gabarapl1	0	0
mmu-miR-1904	Gabarapl1	0	0
mmu-miR-1894-5p	Gabarapl1	0	0
mmu-miR-1929-3p	Gabarapl1	0	0
mmu-miR-1934-5p	Gabarapl1	0	0
mmu-miR-1934-3p	Gabarapl1	0	0
mmu-miR-1941-5p	Gabarapl1	0	0
mmu-miR-1941-5p	Gabarapl1	0	0
mmu-miR-1943-5p	Gabarapl1	0	0
mmu-miR-1943-3p	Gabarapl1	0	0
mmu-miR-1947-3p	Gabarapl1	0	0
mmu-miR-669o-3p	Gabarapl1	0	0
mmu-miR-1952	Gabarapl1	0	0
mmu-miR-1954	Gabarapl1	0	0
mmu-miR-669n	Gabarapl1	0	0
mmu-miR-1963	Gabarapl1	0	0
mmu-miR-1967	Gabarapl1	0	0
mmu-miR-2137	Gabarapl1	0	0
mmu-miR-767	Gabarapl1	0	0
mmu-miR-3057-3p	Gabarapl1	0	0
mmu-miR-3060-5p	Gabarapl1	0	0
mmu-miR-3060-3p	Gabarapl1	0	0
mmu-miR-3061-5p	Gabarapl1	0	0
mmu-miR-3062-5p	Gabarapl1	0	0
mmu-miR-3063-3p	Gabarapl1	0	0
mmu-miR-3069-5p	Gabarapl1	0	0
mmu-miR-3070-2-3p	Gabarapl1	0	0
mmu-miR-3072-3p	Gabarapl1	0	0
mmu-miR-3075-5p	Gabarapl1	0	0
mmu-miR-3075-3p	Gabarapl1	0	0
mmu-miR-3076-5p	Gabarapl1	0	0
mmu-miR-3081-5p	Gabarapl1	0	0
mmu-miR-3082-5p	Gabarapl1	0	0
mmu-miR-3083-5p	Gabarapl1	0	0
mmu-miR-3085-3p	Gabarapl1	0	0
mmu-miR-669p-3p	Gabarapl1	0	0
mmu-miR-3089-5p	Gabarapl1	0	0
mmu-miR-3090-3p	Gabarapl1	0	0
mmu-miR-3092-3p	Gabarapl1	0	0
mmu-miR-3093-5p	Gabarapl1	0	0
mmu-miR-3098-5p	Gabarapl1	0	0
mmu-miR-344b-5p	Gabarapl1	0	0
mmu-miR-344c-5p	Gabarapl1	0	0
mmu-miR-3102-5p.2-5p	Gabarapl1	0	0
mmu-miR-3104-5p	Gabarapl1	0	0
mmu-miR-3105-3p	Gabarapl1	0	0
mmu-miR-486b-3p	Gabarapl1	0	0
mmu-miR-3109-5p	Gabarapl1	0	0
mmu-miR-3110-3p	Gabarapl1	0	0
mmu-miR-3473b	Gabarapl1	0	0
mmu-miR-3473c	Gabarapl1	0	0
mmu-miR-5107-3p	Gabarapl1	0	0
mmu-miR-5107-3p	Gabarapl1	0	0
mmu-miR-5122	Gabarapl1	0	0
mmu-miR-3473d	Gabarapl1	0	0
mmu-miR-3572-5p	Gabarapl1	0	0
mmu-miR-3572-3p	Gabarapl1	0	0
mmu-miR-5128	Gabarapl1	0	0
mmu-miR-5129-3p	Gabarapl1	0	0
mmu-miR-5133	Gabarapl1	0	0
mmu-miR-5621-5p	Gabarapl1	0	0
mmu-miR-5621-3p	Gabarapl1	0	0
mmu-miR-5623-5p	Gabarapl1	0	0
mmu-miR-3073b-3p	Gabarapl1	0	0
mmu-miR-5627-5p	Gabarapl1	0	0
mmu-miR-5627-3p	Gabarapl1	0	0
mmu-miR-6236	Gabarapl1	0	0
mmu-miR-6337	Gabarapl1	0	0
mmu-miR-6356	Gabarapl1	0	0
mmu-miR-6356	Gabarapl1	0	0
mmu-miR-6362	Gabarapl1	0	0
mmu-miR-6366	Gabarapl1	0	0
mmu-miR-6367	Gabarapl1	0	0
mmu-miR-6368	Gabarapl1	0	0
mmu-miR-6381	Gabarapl1	0	0
mmu-miR-6385	Gabarapl1	0	0
mmu-miR-6392-5p	Gabarapl1	0	0
mmu-miR-6392-3p	Gabarapl1	0	0
mmu-miR-6395	Gabarapl1	0	0
mmu-miR-6405	Gabarapl1	0	0
mmu-miR-6407	Gabarapl1	0	0
mmu-miR-6540-3p	Gabarapl1	0	0
mmu-miR-6897-5p	Gabarapl1	0	0
mmu-miR-6897-3p	Gabarapl1	0	0
mmu-miR-6899-3p	Gabarapl1	0	0
mmu-miR-6905-5p	Gabarapl1	0	0
mmu-miR-6907-5p	Gabarapl1	0	0
mmu-miR-6908-3p	Gabarapl1	0	0
mmu-miR-6909-3p	Gabarapl1	0	0
mmu-miR-6910-3p	Gabarapl1	0	0
mmu-miR-6911-5p	Gabarapl1	0	0
mmu-miR-6912-5p	Gabarapl1	0	0
mmu-miR-6913-5p	Gabarapl1	0	0
mmu-miR-6917-3p	Gabarapl1	0	0
mmu-miR-6920-3p	Gabarapl1	0	0
mmu-miR-6922-5p	Gabarapl1	0	0
mmu-miR-6922-3p	Gabarapl1	0	0
mmu-miR-6928-3p	Gabarapl1	0	0
mmu-miR-6928-3p	Gabarapl1	0	0
mmu-miR-6929-5p	Gabarapl1	0	0
mmu-miR-6929-3p	Gabarapl1	0	0
mmu-miR-6930-3p	Gabarapl1	0	0
mmu-miR-6931-5p	Gabarapl1	0	0
mmu-miR-6932-3p	Gabarapl1	0	0
mmu-miR-6933-3p	Gabarapl1	0	0
mmu-miR-6934-3p	Gabarapl1	0	0
mmu-miR-6936-5p	Gabarapl1	0	0
mmu-miR-6936-5p	Gabarapl1	0	0
mmu-miR-6939-5p	Gabarapl1	0	0
mmu-miR-6943-3p	Gabarapl1	0	0
mmu-miR-6944-3p	Gabarapl1	0	0
mmu-miR-6947-5p	Gabarapl1	0	0
mmu-miR-6947-3p	Gabarapl1	0	0
mmu-miR-6948-3p	Gabarapl1	0	0
mmu-miR-6949-3p	Gabarapl1	0	0
mmu-miR-6950-5p	Gabarapl1	0	0
mmu-miR-6952-3p	Gabarapl1	0	0
mmu-miR-6953-3p	Gabarapl1	0	0
mmu-miR-6954-3p	Gabarapl1	0	0
mmu-miR-6955-3p	Gabarapl1	0	0
mmu-miR-6956-5p	Gabarapl1	0	0
mmu-miR-6958-5p	Gabarapl1	0	0
mmu-miR-6959-3p	Gabarapl1	0	0
mmu-miR-6960-3p	Gabarapl1	0	0
mmu-miR-6960-3p	Gabarapl1	0	0
mmu-miR-6961-5p	Gabarapl1	0	0
mmu-miR-6962-3p	Gabarapl1	0	0
mmu-miR-6963-3p	Gabarapl1	0	0
mmu-miR-6964-5p	Gabarapl1	0	0
mmu-miR-6965-5p	Gabarapl1	0	0
mmu-miR-6965-3p	Gabarapl1	0	0
mmu-miR-6966-3p	Gabarapl1	0	0
mmu-miR-6966-3p	Gabarapl1	0	0
mmu-miR-6967-5p	Gabarapl1	0	0
mmu-miR-6968-5p	Gabarapl1	0	0
mmu-miR-6968-3p	Gabarapl1	0	0
mmu-miR-6968-3p	Gabarapl1	0	0
mmu-miR-6969-3p	Gabarapl1	0	0
mmu-miR-6971-5p	Gabarapl1	0	0
mmu-miR-6971-5p	Gabarapl1	0	0
mmu-miR-6972-3p	Gabarapl1	0	0
mmu-miR-6973a-3p	Gabarapl1	0	0
mmu-miR-6976-5p	Gabarapl1	0	0
mmu-miR-6976-3p	Gabarapl1	0	0
mmu-miR-6977-3p	Gabarapl1	0	0
mmu-miR-6978-5p	Gabarapl1	0	0
mmu-miR-6978-3p	Gabarapl1	0	0
mmu-miR-6979-5p	Gabarapl1	0	0
mmu-miR-6979-5p	Gabarapl1	0	0
mmu-miR-6980-5p	Gabarapl1	0	0
mmu-miR-6980-3p	Gabarapl1	0	0
mmu-miR-6980-3p	Gabarapl1	0	0
mmu-miR-6982-3p	Gabarapl1	0	0
mmu-miR-6983-3p	Gabarapl1	0	0
mmu-miR-6985-5p	Gabarapl1	0	0
mmu-miR-6986-5p	Gabarapl1	0	0
mmu-miR-6986-3p	Gabarapl1	0	0
mmu-miR-6986-3p	Gabarapl1	0	0
mmu-miR-6988-3p	Gabarapl1	0	0
mmu-miR-6989-5p	Gabarapl1	0	0
mmu-miR-6989-3p	Gabarapl1	0	0
mmu-miR-6990-5p	Gabarapl1	0	0
mmu-miR-6991-3p	Gabarapl1	0	0
mmu-miR-6992-5p	Gabarapl1	0	0
mmu-miR-6994-3p	Gabarapl1	0	0
mmu-miR-6995-3p	Gabarapl1	0	0
mmu-miR-6997-5p	Gabarapl1	0	0
mmu-miR-6998-5p	Gabarapl1	0	0
mmu-miR-7000-3p	Gabarapl1	0	0
mmu-miR-7002-3p	Gabarapl1	0	0
mmu-miR-6973b-5p	Gabarapl1	0	0
mmu-miR-6973b-3p	Gabarapl1	0	0
mmu-miR-7004-3p	Gabarapl1	0	0
mmu-miR-7005-5p	Gabarapl1	0	0
mmu-miR-7005-3p	Gabarapl1	0	0
mmu-miR-7007-5p	Gabarapl1	0	0
mmu-miR-7007-3p	Gabarapl1	0	0
mmu-miR-7008-5p	Gabarapl1	0	0
mmu-miR-7008-3p	Gabarapl1	0	0
mmu-miR-7009-3p	Gabarapl1	0	0
mmu-miR-7009-3p	Gabarapl1	0	0
mmu-miR-7011-3p	Gabarapl1	0	0
mmu-miR-7011-3p	Gabarapl1	0	0
mmu-miR-7012-5p	Gabarapl1	0	0
mmu-miR-7014-5p	Gabarapl1	0	0
mmu-miR-7016-3p	Gabarapl1	0	0
mmu-miR-7018-3p	Gabarapl1	0	0
mmu-miR-7020-5p	Gabarapl1	0	0
mmu-miR-7020-3p	Gabarapl1	0	0
mmu-miR-7021-3p	Gabarapl1	0	0
mmu-miR-7024-3p	Gabarapl1	0	0
mmu-miR-7028-5p	Gabarapl1	0	0
mmu-miR-7028-3p	Gabarapl1	0	0
mmu-miR-7030-5p	Gabarapl1	0	0
mmu-miR-7031-3p	Gabarapl1	0	0
mmu-miR-7033-3p	Gabarapl1	0	0
mmu-miR-7034-3p	Gabarapl1	0	0
mmu-miR-7034-3p	Gabarapl1	0	0
mmu-miR-7035-3p	Gabarapl1	0	0
mmu-miR-7036a-3p	Gabarapl1	0	0
mmu-miR-7038-3p	Gabarapl1	0	0
mmu-miR-7039-5p	Gabarapl1	0	0
mmu-miR-7039-3p	Gabarapl1	0	0
mmu-miR-7040-5p	Gabarapl1	0	0
mmu-miR-7040-3p	Gabarapl1	0	0
mmu-miR-7043-3p	Gabarapl1	0	0
mmu-miR-7044-3p	Gabarapl1	0	0
mmu-miR-7045-5p	Gabarapl1	0	0
mmu-miR-7045-5p	Gabarapl1	0	0
mmu-miR-7046-5p	Gabarapl1	0	0
mmu-miR-7046-3p	Gabarapl1	0	0
mmu-miR-7048-5p	Gabarapl1	0	0
mmu-miR-7049-3p	Gabarapl1	0	0
mmu-miR-7050-5p	Gabarapl1	0	0
mmu-miR-7052-3p	Gabarapl1	0	0
mmu-miR-7053-3p	Gabarapl1	0	0
mmu-miR-7055-5p	Gabarapl1	0	0
mmu-miR-7056-5p	Gabarapl1	0	0
mmu-miR-7057-5p	Gabarapl1	0	0
mmu-miR-7058-3p	Gabarapl1	0	0
mmu-miR-7062-3p	Gabarapl1	0	0
mmu-miR-7062-3p	Gabarapl1	0	0
mmu-miR-7063-3p	Gabarapl1	0	0
mmu-miR-7063-3p	Gabarapl1	0	0
mmu-miR-7066-5p	Gabarapl1	0	0
mmu-miR-7066-3p	Gabarapl1	0	0
mmu-miR-7067-3p	Gabarapl1	0	0
mmu-miR-7068-5p	Gabarapl1	0	0
mmu-miR-7069-5p	Gabarapl1	0	0
mmu-miR-7070-5p	Gabarapl1	0	0
mmu-miR-7071-5p	Gabarapl1	0	0
mmu-miR-7071-3p	Gabarapl1	0	0
mmu-miR-7072-5p	Gabarapl1	0	0
mmu-miR-7073-3p	Gabarapl1	0	0
mmu-miR-7075-5p	Gabarapl1	0	0
mmu-miR-7076-5p	Gabarapl1	0	0
mmu-miR-7076-5p	Gabarapl1	0	0
mmu-miR-7076-3p	Gabarapl1	0	0
mmu-miR-7079-5p	Gabarapl1	0	0
mmu-miR-7082-3p	Gabarapl1	0	0
mmu-miR-7083-3p	Gabarapl1	0	0
mmu-miR-7087-5p	Gabarapl1	0	0
mmu-miR-7087-3p	Gabarapl1	0	0
mmu-miR-7088-3p	Gabarapl1	0	0
mmu-miR-7089-5p	Gabarapl1	0	0
mmu-miR-7089-3p	Gabarapl1	0	0
mmu-miR-7094-3p	Gabarapl1	0	0
mmu-miR-7115-3p	Gabarapl1	0	0
mmu-miR-7116-3p	Gabarapl1	0	0
mmu-miR-7117-3p	Gabarapl1	0	0
mmu-miR-7117-3p	Gabarapl1	0	0
mmu-miR-7118-5p	Gabarapl1	0	0
mmu-miR-7118-3p	Gabarapl1	0	0
mmu-miR-7119-3p	Gabarapl1	0	0
mmu-miR-7211-5p	Gabarapl1	0	0
mmu-miR-7211-3p	Gabarapl1	0	0
mmu-miR-7214-5p	Gabarapl1	0	0
mmu-miR-7216-5p	Gabarapl1	0	0
mmu-miR-7218-3p	Gabarapl1	0	0
mmu-miR-7221-3p	Gabarapl1	0	0
mmu-miR-7224-5p	Gabarapl1	0	0
mmu-miR-7225-3p	Gabarapl1	0	0
mmu-miR-7235-5p	Gabarapl1	0	0
mmu-miR-7235-5p	Gabarapl1	0	0
mmu-miR-7235-5p	Gabarapl1	0	0
mmu-miR-7238-5p	Gabarapl1	0	0
mmu-miR-7242-5p	Gabarapl1	0	0
mmu-miR-7578	Gabarapl1	0	0
mmu-miR-6546-5p	Gabarapl1	0	0
mmu-miR-7647-3p	Gabarapl1	0	0
mmu-miR-7652-3p	Gabarapl1	0	0
mmu-miR-7653-5p	Gabarapl1	0	0
mmu-miR-7654-3p	Gabarapl1	0	0
mmu-miR-7656-5p	Gabarapl1	0	0
mmu-miR-7656-3p	Gabarapl1	0	0
mmu-miR-7658-5p	Gabarapl1	0	0
mmu-miR-7658-5p	Gabarapl1	0	0
mmu-miR-7660-5p	Gabarapl1	0	0
mmu-miR-7660-5p	Gabarapl1	0	0
mmu-miR-7669-5p	Gabarapl1	0	0
mmu-miR-7672-3p	Gabarapl1	0	0
mmu-miR-3569-5p	Gabarapl1	0	0
mmu-miR-6715-3p	Gabarapl1	0	0
mmu-miR-7681-5p	Gabarapl1	0	0
mmu-miR-7682-3p	Gabarapl1	0	0
mmu-miR-7684-3p	Gabarapl1	0	0
mmu-miR-7687-5p	Gabarapl1	0	0
mmu-miR-7689-5p	Gabarapl1	0	0
mmu-miR-8093	Gabarapl1	0	0
mmu-miR-8093	Gabarapl1	0	0
mmu-miR-8095	Gabarapl1	0	0
mmu-miR-8101	Gabarapl1	0	0
mmu-miR-3535	Gabarapl1	0	0
mmu-miR-8108	Gabarapl1	0	0
mmu-miR-8110	Gabarapl1	0	0
mmu-miR-8114	Gabarapl1	0	0
mmu-miR-8120	Gabarapl1	0	0
mmu-miR-8120	Gabarapl1	0	0
mmu-miR-3473g	Gabarapl1	0	0
mmu-miR-3473g	Gabarapl1	0	0
mmu-miR-3552	Gabarapl1	0	0
mmu-miR-1271-3p	Gabarapl1	0	0
mmu-miR-1911-3p	Gabarapl1	0	0
mmu-miR-12179-5p	Gabarapl1	0	0
mmu-miR-12181-3p	Gabarapl1	0	0
mmu-miR-12182-5p	Gabarapl1	0	0
mmu-miR-12183-5p	Gabarapl1	0	0
mmu-miR-12185-3p	Gabarapl1	0	0
mmu-miR-12186-5p	Gabarapl1	0	0
mmu-miR-12187-5p	Gabarapl1	0	0
mmu-miR-12188-3p	Gabarapl1	0	0
mmu-miR-3083b-5p	Gabarapl1	0	0
mmu-miR-12193-3p	Gabarapl1	0	0
mmu-miR-12198-3p	Gabarapl1	0	0
mmu-miR-12199-3p	Gabarapl1	0	0
mmu-miR-12201-3p	Gabarapl1	0	0
mmu-miR-12205-5p	Gabarapl1	0	0

## Sheet: mirna-circrna
miRNA	circRNA
mmu-miR-138-5p	mmu_Fam168b_0019000
mmu-miR-138-5p	mmu_Rasa1_0009000
mmu-miR-138-5p	mmu_Elp4_0017000
mmu-miR-138-5p	mmu_Elp4_0006000
mmu-miR-138-5p	mmu_Ssbp2_0053000
mmu-miR-138-5p	mmu_chr10_1893000
mmu-miR-138-5p	mmu_Ptpn22_0011000
mmu-miR-138-5p	mmu_Slc24a2_0002000
mmu-miR-138-5p	mmu_Slc24a2_0015000
mmu-miR-138-5p	mmu_Herc3_0001000
mmu-miR-138-5p	mmu_Tbc1d23_0021000
mmu-miR-138-5p	mmu_Gm25200_0002000
mmu-miR-138-5p	mmu_chr11_3383000
mmu-miR-138-5p	mmu_Supt3_0015000
mmu-miR-138-5p	mmu_Cnbd2_0009000
mmu-miR-138-5p	mmu_Elmo1_0012000
mmu-miR-138-5p	mmu_Vps53_0027000
mmu-miR-138-5p	mmu_Anks3_0004000
mmu-miR-138-5p	mmu_Ptprr_0016000
mmu-miR-138-5p	mmu_Tasor2_0008000
mmu-miR-138-5p	mmu_Magi2_0080000
mmu-miR-138-5p	mmu_Ddhd1_0026000
mmu-miR-138-5p	mmu_Gm36529_0001000
mmu-miR-138-5p	mmu_Golga1_0018000
mmu-miR-138-5p	mmu_Ubac1_0018000
mmu-miR-138-5p	mmu_chr9_1895000
mmu-miR-138-5p	mmu_Nsmce4a_0013000
mmu-miR-138-5p	mmu_Fgfr2_0050000
mmu-miR-138-5p	mmu_Trmt11_0020000
mmu-miR-138-5p	mmu_Kif21a_0031000
mmu-miR-138-5p	mmu_Kif21a_0026000
mmu-miR-138-5p	mmu_Kif21a_0028000
mmu-miR-138-5p	mmu_Kif21a_0029000
mmu-miR-138-5p	mmu_Kif21a_0002000
mmu-miR-138-5p	mmu_Kif21a_0016000
mmu-miR-138-5p	mmu_chr12_0604000
mmu-miR-138-5p	mmu_Ppm1e_0020000
mmu-miR-138-5p	mmu_Ccdc85a_0014000
mmu-miR-138-5p	mmu_Ccdc85a_0019000
mmu-miR-138-5p	mmu_1700017D01Rik_0002000
mmu-miR-138-5p	mmu_Fstl1_0009000
mmu-miR-138-5p	mmu_chr3_1967000
mmu-miR-138-5p	mmu_Casp8ap2_0017000
mmu-miR-138-5p	mmu_Gprasp1_0011000
mmu-miR-138-5p	mmu_Dnah8_0093000
mmu-miR-138-5p	mmu_Wipi2_0016000
mmu-miR-138-5p	mmu_Stx18_0022000
mmu-miR-138-5p	mmu_Dock9_0067000
mmu-miR-138-5p	mmu_Cpped1_0006000
mmu-miR-138-5p	mmu_chr2_1300000
mmu-miR-138-5p	mmu_chr3_0248000
mmu-miR-138-5p	mmu_Rbm26_0021000
mmu-miR-138-5p	mmu_Fbp1_0005000
mmu-miR-138-5p	mmu_Smyd2_0004000
mmu-miR-138-5p	mmu_Tmcc2_0005000
mmu-miR-138-5p	mmu_Sec31a_0014000
mmu-miR-138-5p	mmu_Exd2_0016000
mmu-miR-138-5p	mmu_Exd2_0017000
mmu-miR-138-5p	mmu_Phf21b_0007000
mmu-miR-138-5p	mmu_Phf21b_0001000
mmu-miR-138-5p	mmu_Ywhab_0004000
mmu-miR-138-5p	mmu_Stk4_0001000
mmu-miR-138-5p	mmu_Ywhab_0002000
mmu-miR-138-5p	mmu_Rdx_0011000
mmu-miR-138-5p	mmu_Ptprz1_0048000
mmu-miR-138-5p	mmu_Avil_0001000
mmu-miR-138-5p	mmu_chr6_0156000
mmu-miR-138-5p	mmu_Kyat3_0001000
mmu-miR-138-5p	mmu_chr10_1634000
mmu-miR-138-5p	mmu_Strbp_0054000
mmu-miR-138-5p	mmu_Strbp_0061000
mmu-miR-138-5p	mmu_Strbp_0044000
mmu-miR-138-5p	mmu_Lamp1_0013000
mmu-miR-138-5p	mmu_Hspa9_0017000
mmu-miR-138-5p	mmu_Pnpt1_0003000
mmu-miR-138-5p	mmu_chr1_0234000
mmu-miR-138-5p	mmu_Ptpn3_0005000
mmu-miR-138-5p	mmu_Ptpn3_0041000
mmu-miR-138-5p	mmu_Gas8_0003000
mmu-miR-138-5p	mmu_Dock3_0136000
mmu-miR-138-5p	mmu_Cdh7_0039000
mmu-miR-138-5p	mmu_Nolc1_0004000
mmu-miR-138-5p	mmu_Gtf3c2_0017000
mmu-miR-138-5p	mmu_Mei4_0001000
mmu-miR-138-5p	mmu_Lrba_0090000
mmu-miR-138-5p	mmu_Tmem62_0012000
mmu-miR-138-5p	mmu_Lypd4_0003000
mmu-miR-138-5p	mmu_chr6_1599000
mmu-miR-138-5p	mmu_Stxbp5l_0176000
mmu-miR-138-5p	mmu_Snd1_0033000
mmu-miR-138-5p	mmu_Snd1_0039000
mmu-miR-138-5p	mmu_Snd1_0040000
mmu-miR-138-5p	mmu_chr13_1060000
mmu-miR-138-5p	mmu_Vwa8_0093000
mmu-miR-138-5p	mmu_Mars_0006000
mmu-miR-138-5p	mmu_chr4_0858000
mmu-miR-138-5p	mmu_Ncor2_0051000
mmu-miR-138-5p	mmu_Ncor1_0155000
mmu-miR-138-5p	mmu_Cwf19l1_0009000
mmu-miR-138-5p	mmu_chr5_1672000
mmu-miR-138-5p	mmu_Gnptg_0002000
mmu-miR-138-5p	mmu_Ephb2_0008000
mmu-miR-138-5p	mmu_Tenm4_0044000
mmu-miR-138-5p	mmu_Tenm4_0045000
mmu-miR-138-5p	mmu_Slit3_0048000
mmu-miR-138-5p	mmu_Carmil2_0007000
mmu-miR-138-5p	mmu_Ptk2_0008000
mmu-miR-138-5p	mmu_Ptk2_0010000
mmu-miR-138-5p	mmu_Slc1a4_0004000
mmu-miR-138-5p	mmu_Slc1a4_0003000
mmu-miR-138-5p	mmu_Nlrp5-ps_0021000
mmu-miR-138-5p	mmu_Ryk_0033000
mmu-miR-138-5p	mmu_Polr2b_0002000
mmu-miR-138-5p	mmu_Apbb2_0022000
mmu-miR-138-5p	mmu_chr11_2047000
mmu-miR-138-5p	mmu_Gigyf2_0061000
mmu-miR-138-5p	mmu_chr14_0197000
mmu-miR-138-5p	mmu_Il1r1_0007000
mmu-miR-138-5p	mmu_Itgb2_0005000
mmu-miR-138-5p	mmu_Il1rapl2_0011000
mmu-miR-138-5p	mmu_Nxpe3_0019000
mmu-miR-138-5p	mmu_Ift81_0003000
mmu-miR-138-5p	mmu_Rasgrp3_0015000
mmu-miR-138-5p	mmu_Rasgrp3_0017000
mmu-miR-138-5p	mmu_Rasgrp3_0019000
mmu-miR-138-5p	mmu_Mical1_0005000
mmu-miR-138-5p	mmu_Nisch_0014000
mmu-miR-138-5p	mmu_Cyp39a1_0007000
mmu-miR-138-5p	mmu_Ube2j1_0008000
mmu-miR-199a-5p	mmu_chr11_1896000
mmu-miR-199a-5p	mmu_chr4_0457000
mmu-miR-199a-5p	mmu_Stau2_0077000
mmu-miR-199a-5p	mmu_Ctnna3_0047000
mmu-miR-199a-5p	mmu_Tut7_0043000
mmu-miR-199a-5p	mmu_Ppp4r3a_0026000
mmu-miR-199a-5p	mmu_Wdfy2_0012000
mmu-miR-199a-5p	mmu_Car8_0002000
mmu-miR-199a-5p	mmu_Zfp790_0004000
mmu-miR-199a-5p	mmu_Zfp790_0005000
mmu-miR-199a-5p	mmu_Gm12695_0001000
mmu-miR-199a-5p	mmu_Itpr2_0081000
mmu-miR-199a-5p	mmu_Schip1_0019000
mmu-miR-199a-5p	mmu_chr1_0161000
mmu-miR-199a-5p	mmu_chr7_0040000
mmu-miR-199a-5p	mmu_chr14_1326000
mmu-miR-199a-5p	mmu_Mpdz_0003000
mmu-miR-199a-5p	mmu_Mpdz_0011000
mmu-miR-199a-5p	mmu_Mpdz_0012000
mmu-miR-199a-5p	mmu_Igfbp3_0002000
mmu-miR-199a-5p	mmu_Smyd2_0004000
mmu-miR-199a-5p	mmu_Sec24b_0002000
mmu-miR-199a-5p	mmu_Strbp_0073000
mmu-miR-199a-5p	mmu_Strbp_0102000
mmu-miR-199a-5p	mmu_Gm20319_0001000
mmu-miR-199a-5p	mmu_Grik2_0028000
mmu-miR-199a-5p	mmu_Themis_0020000
mmu-miR-199a-5p	mmu_Bptf_0050000
mmu-miR-199a-5p	mmu_Sema5a_0058000
mmu-miR-199a-5p	mmu_chr11_2031000
mmu-miR-199a-5p	mmu_Sgms1_0062000
mmu-miR-199a-5p	mmu_Sgms1_0031000
mmu-miR-199a-5p	mmu_Sgms1_0078000
mmu-miR-199a-5p	mmu_Sgms1_0073000
mmu-miR-199a-5p	mmu_Sgms1_0081000
mmu-miR-199a-5p	mmu_Sgms1_0045000
mmu-miR-199a-5p	mmu_Snd1_0040000
mmu-miR-199a-5p	mmu_Arfgef3_0028000
mmu-miR-199a-5p	mmu_Ephb2_0008000
mmu-miR-199a-5p	mmu_chr17_0919000
mmu-miR-199a-5p	mmu_Spag9_0016000
mmu-miR-199a-5p	mmu_Strbp_0103000
mmu-miR-199a-5p	mmu_4930402H24Rik_0100000
mmu-miR-199a-5p	mmu_chr11_1896000
mmu-miR-199a-5p	mmu_chr4_0457000
mmu-miR-199a-5p	mmu_Stau2_0077000
mmu-miR-199a-5p	mmu_Ctnna3_0047000
mmu-miR-199a-5p	mmu_Tut7_0043000
mmu-miR-199a-5p	mmu_Ppp4r3a_0026000
mmu-miR-199a-5p	mmu_Wdfy2_0012000
mmu-miR-199a-5p	mmu_Car8_0002000
mmu-miR-199a-5p	mmu_Zfp790_0004000
mmu-miR-199a-5p	mmu_Zfp790_0005000
mmu-miR-199a-5p	mmu_Gm12695_0001000
mmu-miR-199a-5p	mmu_Itpr2_0081000
mmu-miR-199a-5p	mmu_Schip1_0019000
mmu-miR-199a-5p	mmu_chr1_0161000
mmu-miR-199a-5p	mmu_chr7_0040000
mmu-miR-199a-5p	mmu_chr14_1326000
mmu-miR-199a-5p	mmu_Mpdz_0003000
mmu-miR-199a-5p	mmu_Mpdz_0011000
mmu-miR-199a-5p	mmu_Mpdz_0012000
mmu-miR-199a-5p	mmu_Igfbp3_0002000
mmu-miR-199a-5p	mmu_Smyd2_0004000
mmu-miR-199a-5p	mmu_Sec24b_0002000
mmu-miR-199a-5p	mmu_Strbp_0073000
mmu-miR-199a-5p	mmu_Strbp_0102000
mmu-miR-199a-5p	mmu_Gm20319_0001000
mmu-miR-199a-5p	mmu_Grik2_0028000
mmu-miR-199a-5p	mmu_Themis_0020000
mmu-miR-199a-5p	mmu_Bptf_0050000
mmu-miR-199a-5p	mmu_Sema5a_0058000
mmu-miR-199a-5p	mmu_chr11_2031000
mmu-miR-199a-5p	mmu_Sgms1_0062000
mmu-miR-199a-5p	mmu_Sgms1_0031000
mmu-miR-199a-5p	mmu_Sgms1_0078000
mmu-miR-199a-5p	mmu_Sgms1_0073000
mmu-miR-199a-5p	mmu_Sgms1_0081000
mmu-miR-199a-5p	mmu_Sgms1_0045000
mmu-miR-199a-5p	mmu_Snd1_0040000
mmu-miR-199a-5p	mmu_Arfgef3_0028000
mmu-miR-199a-5p	mmu_Ephb2_0008000
mmu-miR-199a-5p	mmu_chr17_0919000
mmu-miR-199a-5p	mmu_Spag9_0016000
mmu-miR-199a-5p	mmu_Strbp_0103000
mmu-miR-199a-5p	mmu_4930402H24Rik_0100000
mmu-miR-125b-5p	mmu_Man1a2_0052000
mmu-miR-125b-5p	mmu_Adamts19_0026000
mmu-miR-125b-5p	mmu_Cnbd2_0009000
mmu-miR-125b-5p	mmu_Zdhhc1_0002000
mmu-miR-125b-5p	mmu_Wnt9b_0001000
mmu-miR-125b-5p	mmu_Magi1_0109000
mmu-miR-125b-5p	mmu_chr9_1895000
mmu-miR-125b-5p	mmu_Kif21a_0031000
mmu-miR-125b-5p	mmu_Kif21a_0006000
mmu-miR-125b-5p	mmu_Kif21a_0026000
mmu-miR-125b-5p	mmu_Kif21a_0028000
mmu-miR-125b-5p	mmu_Kif21a_0029000
mmu-miR-125b-5p	mmu_Kif21a_0002000
mmu-miR-125b-5p	mmu_Kif21a_0018000
mmu-miR-125b-5p	mmu_Kif21a_0012000
mmu-miR-125b-5p	mmu_Kif21a_0016000
mmu-miR-125b-5p	mmu_Acsl3_0025000
mmu-miR-125b-5p	mmu_Slc38a3_0005000
mmu-miR-125b-5p	mmu_Trappc9_0065000
mmu-miR-125b-5p	mmu_Mpdz_0003000
mmu-miR-125b-5p	mmu_Zfp704_0006000
mmu-miR-125b-5p	mmu_Zfp704_0016000
mmu-miR-125b-5p	mmu_Cryz_0008000
mmu-miR-125b-5p	mmu_Nudt9_0002000
mmu-miR-125b-5p	mmu_Camta1_0020000
mmu-miR-125b-5p	mmu_Mndal_0016000
mmu-miR-125b-5p	mmu_Ifi203_0007000
mmu-miR-125b-5p	mmu_Atp6v0a4_0011000
mmu-miR-125b-5p	mmu_Shank3_0014000
mmu-miR-125b-5p	mmu_Shank3_0020000
mmu-miR-125b-5p	mmu_Shank3_0015000
mmu-miR-125b-5p	mmu_Nudt9_0009000
mmu-miR-125b-5p	mmu_Drc1_0003000
mmu-miR-146a-5p	mmu_Msra_0011000
mmu-miR-146a-5p	mmu_Pon3_0006000
mmu-miR-146a-5p	mmu_4930429C20Rik_0001000
mmu-miR-146a-5p	mmu_chr11_0541000
mmu-miR-146a-5p	mmu_Ints4_0029000
mmu-miR-146a-5p	mmu_Rnpc3_0001000
mmu-miR-146a-5p	mmu_Kif9_0024000
mmu-miR-351-5p	mmu_chr6_2007000
mmu-miR-351-5p	mmu_chr2_3108000
mmu-miR-351-5p	mmu_Adamtsl3_0019000
mmu-miR-351-5p	mmu_Gm15506_0001000
mmu-miR-351-5p	mmu_Cyp2j9_0005000
mmu-miR-351-5p	mmu_Pon3_0006000
mmu-miR-351-5p	mmu_Herc3_0003000
mmu-miR-351-5p	mmu_Gm25200_0002000
mmu-miR-351-5p	mmu_chr5_0299000
mmu-miR-351-5p	mmu_Aak1_0048000
mmu-miR-351-5p	mmu_Mgat4a_0033000
mmu-miR-351-5p	mmu_Nrap_0026000
mmu-miR-351-5p	mmu_Nrap_0025000
mmu-miR-351-5p	mmu_Nek4_0013000
mmu-miR-351-5p	mmu_Nek4_0014000
mmu-miR-351-5p	mmu_Akap17b_0009000
mmu-miR-351-5p	mmu_Akap17b_0011000
mmu-miR-351-5p	mmu_Pvalb_0001000
mmu-miR-351-5p	mmu_Ccdc66_0024000
mmu-miR-351-5p	mmu_chr1_0676000
mmu-miR-351-5p	mmu_Mndal_0003000
mmu-miR-351-5p	mmu_Mndal_0004000
mmu-miR-351-5p	mmu_Mndal_0013000
mmu-miR-351-5p	mmu_Gapvd1_0007000
mmu-miR-351-5p	mmu_Immp2l_0018000
mmu-miR-351-5p	mmu_Immp2l_0021000
mmu-miR-351-5p	mmu_Bach2it1_0001000
mmu-miR-351-5p	mmu_Stam2_0015000
mmu-miR-351-5p	mmu_Trdn_0086000
mmu-miR-351-5p	mmu_Rpl22_0001000
mmu-miR-351-5p	mmu_Slc25a40_0007000
mmu-miR-351-5p	mmu_Trappc9_0025000
mmu-miR-351-5p	mmu_chr8_0130000
mmu-miR-351-5p	mmu_chr10_0106000
mmu-miR-351-5p	mmu_Cabcoco1_0004000
mmu-miR-351-5p	mmu_chr5_2373000
mmu-miR-351-5p	mmu_chr14_0218000
mmu-miR-351-5p	mmu_Fyn_0021000
mmu-miR-351-5p	mmu_Iqsec1_0017000
mmu-miR-351-5p	mmu_Pcdhga4_0001000
mmu-miR-351-5p	mmu_Gm15169_0001000
mmu-miR-351-5p	mmu_chr14_1753000
mmu-miR-351-5p	mmu_chrX_0506000
mmu-miR-351-5p	mmu_Dzip1l_0004000
mmu-miR-351-5p	mmu_Dzip1l_0007000
mmu-miR-351-5p	mmu_Prpf40b_0006000
mmu-miR-351-5p	mmu_B630019A10Rik_0001000
mmu-miR-351-5p	mmu_Zfp568_0008000
mmu-miR-351-5p	mmu_Zfp568_0006000
mmu-miR-351-5p	mmu_Zfp568_0007000
mmu-miR-351-5p	mmu_Ubac1_0018000
mmu-miR-351-5p	mmu_Csmd2_0066000
mmu-miR-351-5p	mmu_Dnaic2_0007000
mmu-miR-351-5p	mmu_Dsp_0019000
mmu-miR-351-5p	mmu_Dsp_0020000
mmu-miR-351-5p	mmu_C4b_0017000
mmu-miR-351-5p	mmu_Ubr1_0036000
mmu-miR-351-5p	mmu_Ubr1_0030000
mmu-miR-351-5p	mmu_Kif21a_0016000
mmu-miR-351-5p	mmu_chrX_0934000
mmu-miR-351-5p	mmu_Bbs4_0016000
mmu-miR-351-5p	mmu_Mrps35_0005000
mmu-miR-351-5p	mmu_chr18_0843000
mmu-miR-351-5p	mmu_Luc7l_0020000
mmu-miR-351-5p	mmu_Lrp1b_0179000
mmu-miR-351-5p	mmu_Lrp1b_0169000
mmu-miR-351-5p	mmu_B130055M24Rik_0001000
mmu-miR-351-5p	mmu_Pign_0055000
mmu-miR-351-5p	mmu_Ddx11_0002000
mmu-miR-351-5p	mmu_Nup133_0021000
mmu-miR-351-5p	mmu_Brd7_0009000
mmu-miR-351-5p	mmu_Ifnar1_0003000
mmu-miR-351-5p	mmu_Catspere1_0025000
mmu-miR-351-5p	mmu_Naaladl2_0008000
mmu-miR-351-5p	mmu_Mga_0069000
mmu-miR-351-5p	mmu_Trappc9_0065000
mmu-miR-351-5p	mmu_Cdk19_0022000
mmu-miR-351-5p	mmu_Cdk19_0023000
mmu-miR-351-5p	mmu_Arhgef38_0009000
mmu-miR-351-5p	mmu_Pum3_0019000
mmu-miR-351-5p	mmu_Ptpn11_0008000
mmu-miR-351-5p	mmu_chr7_2891000
mmu-miR-351-5p	mmu_Dock9_0067000
mmu-miR-351-5p	mmu_Cdkal1_0036000
mmu-miR-351-5p	mmu_Cdkal1_0049000
mmu-miR-351-5p	mmu_chr14_1456000
mmu-miR-351-5p	mmu_Gm37165_0002000
mmu-miR-351-5p	mmu_chr12_0537000
mmu-miR-351-5p	mmu_Camk2g_0003000
mmu-miR-351-5p	mmu_Camk2g_0007000
mmu-miR-351-5p	mmu_Obscn_0050000
mmu-miR-351-5p	mmu_Gm15318_0001000
mmu-miR-351-5p	mmu_chr4_0596000
mmu-miR-351-5p	mmu_chr16_0098000
mmu-miR-351-5p	mmu_Megf11_0012000
mmu-miR-351-5p	mmu_Dop1a_0042000
mmu-miR-351-5p	mmu_Efcab5_0036000
mmu-miR-351-5p	mmu_Top1_0022000
mmu-miR-351-5p	mmu_Top1_0048000
mmu-miR-351-5p	mmu_Atp2a2_0033000
mmu-miR-351-5p	mmu_Dip2c_0029000
mmu-miR-351-5p	mmu_Dip2c_0028000
mmu-miR-351-5p	mmu_Tmcc2_0005000
mmu-miR-351-5p	mmu_Ick_0020000
mmu-miR-351-5p	mmu_Syne3_0006000
mmu-miR-351-5p	mmu_Syne3_0004000
mmu-miR-351-5p	mmu_Ttc21b_0035000
mmu-miR-351-5p	mmu_Ywhab_0002000
mmu-miR-351-5p	mmu_Unc13c_0074000
mmu-miR-351-5p	mmu_Unc13c_0066000
mmu-miR-351-5p	mmu_chr3_0541000
mmu-miR-351-5p	mmu_chr17_0631000
mmu-miR-351-5p	mmu_chr10_1177000
mmu-miR-351-5p	mmu_Ryr1_0020000
mmu-miR-351-5p	mmu_Gspt1_0040000
mmu-miR-351-5p	mmu_Gspt1_0029000
mmu-miR-351-5p	mmu_Gspt1_0014000
mmu-miR-351-5p	mmu_Gspt1_0006000
mmu-miR-351-5p	mmu_Col3a1_0067000
mmu-miR-351-5p	mmu_Yes1_0006000
mmu-miR-351-5p	mmu_Slc25a12_0015000
mmu-miR-351-5p	mmu_Mtg1_0006000
mmu-miR-351-5p	mmu_Mtg1_0004000
mmu-miR-351-5p	mmu_Slc25a25_0001000
mmu-miR-351-5p	mmu_Apaf1_0029000
mmu-miR-351-5p	mmu_Ercc4_0007000
mmu-miR-351-5p	mmu_Ctnna1_0021000
mmu-miR-351-5p	mmu_Ctnna1_0022000
mmu-miR-351-5p	mmu_Klhdc7a_0001000
mmu-miR-351-5p	mmu_Ube2cbp_0017000
mmu-miR-351-5p	mmu_Col19a1_0039000
mmu-miR-351-5p	mmu_chr7_1874000
mmu-miR-351-5p	mmu_Xaf1_0001000
mmu-miR-351-5p	mmu_Tmem50a_0003000
mmu-miR-351-5p	mmu_Tmem50a_0013000
mmu-miR-351-5p	mmu_Atp2a1_0020000
mmu-miR-351-5p	mmu_Bptf_0050000
mmu-miR-351-5p	mmu_Invs_0017000
mmu-miR-351-5p	mmu_Nup205_0078000
mmu-miR-351-5p	mmu_Airn_0009000
mmu-miR-351-5p	mmu_Gtf3c2_0012000
mmu-miR-351-5p	mmu_Gm28052_0010000
mmu-miR-351-5p	mmu_chr14_1248000
mmu-miR-351-5p	mmu_Smarcal1_0019000
mmu-miR-351-5p	mmu_Fip1l1_0046000
mmu-miR-351-5p	mmu_Fip1l1_0047000
mmu-miR-351-5p	mmu_chr16_0909000
mmu-miR-351-5p	mmu_chr12_0845000
mmu-miR-351-5p	mmu_Auts2_0050000
mmu-miR-351-5p	mmu_Dpp6_0057000
mmu-miR-351-5p	mmu_Dpp6_0058000
mmu-miR-351-5p	mmu_Col6a1_0024000
mmu-miR-351-5p	mmu_Epb41l4b_0062000
mmu-miR-351-5p	mmu_Epb41_0065000
mmu-miR-351-5p	mmu_Epb41_0041000
mmu-miR-351-5p	mmu_Epb41_0032000
mmu-miR-351-5p	mmu_Epb41_0061000
mmu-miR-351-5p	mmu_chr14_0643000
mmu-miR-351-5p	mmu_chr15_0975000
mmu-miR-351-5p	mmu_Iqgap1_0039000
mmu-miR-351-5p	mmu_Cep350_0022000
mmu-miR-351-5p	mmu_Shank3_0017000
mmu-miR-351-5p	mmu_chr18_0889000
mmu-miR-351-5p	mmu_H13_0007000
mmu-miR-351-5p	mmu_Ccnk_0012000
mmu-miR-351-5p	mmu_Dgcr8_0001000
mmu-miR-351-5p	mmu_Armc2_0017000
mmu-miR-351-5p	mmu_C2cd3_0006000
mmu-miR-351-5p	mmu_chr10_0532000
mmu-miR-351-5p	mmu_Gnptg_0002000
mmu-miR-351-5p	mmu_Cabin1_0012000
mmu-miR-351-5p	mmu_Shank2_0026000
mmu-miR-351-5p	mmu_Ttc19_0017000
mmu-miR-351-5p	mmu_Wdr59_0024000
mmu-miR-351-5p	mmu_Drosha_0023000
mmu-miR-351-5p	mmu_Kif9_0024000
mmu-miR-351-5p	mmu_Esyt2_0063000
mmu-miR-351-5p	mmu_Ptk2_0014000
mmu-miR-351-5p	mmu_Wdfy3_0025000
mmu-miR-351-5p	mmu_Rbm20_0018000
mmu-miR-351-5p	mmu_Patj_0110000
mmu-miR-351-5p	mmu_Parva_0017000
mmu-miR-351-5p	mmu_Clk4_0016000
mmu-miR-351-5p	mmu_Clk4_0025000
mmu-miR-351-5p	mmu_Agbl4_0052000
mmu-miR-351-5p	mmu_Rere_0067000
mmu-miR-351-5p	mmu_Nasp_0017000
mmu-miR-351-5p	mmu_Phactr4_0018000
mmu-miR-351-5p	mmu_chr11_1089000
mmu-miR-351-5p	mmu_Scn1a_0005000
mmu-miR-351-5p	mmu_Il1r1_0007000
mmu-miR-351-5p	mmu_Ehmt1_0106000
mmu-miR-351-5p	mmu_Ubr4_0069000
mmu-miR-351-5p	mmu_Trp53bp1_0030000
mmu-miR-351-5p	mmu_Trp53bp1_0021000
mmu-miR-351-5p	mmu_Eef2k_0007000
mmu-miR-351-5p	mmu_Camk1d_0023000
mmu-miR-351-5p	mmu_Fto_0003000
mmu-miR-351-5p	mmu_Fto_0011000
mmu-miR-351-5p	mmu_Fto_0001000
mmu-miR-351-5p	mmu_chr16_0623000
mmu-miR-351-5p	mmu_Anks6_0007000
mmu-miR-351-5p	mmu_Anks6_0010000
mmu-miR-351-5p	mmu_Fam118b_0001000
mmu-miR-351-5p	mmu_Fam118b_0007000
mmu-miR-212-3p	mmu_chrX_1043000
mmu-miR-212-3p	mmu_Gpbp1l1_0016000
mmu-miR-212-3p	mmu_Msra_0011000
mmu-miR-212-3p	mmu_Ubn1_0014000
mmu-miR-212-3p	mmu_Gm25200_0002000
mmu-miR-212-3p	mmu_Aak1_0049000
mmu-miR-212-3p	mmu_Mtus1_0006000
mmu-miR-212-3p	mmu_Nrg3_0030000
mmu-miR-212-3p	mmu_Pvalb_0001000
mmu-miR-212-3p	mmu_Cnbd2_0009000
mmu-miR-212-3p	mmu_Rrp12_0002000
mmu-miR-212-3p	mmu_Faim_0006000
mmu-miR-212-3p	mmu_Tut4_0081000
mmu-miR-212-3p	mmu_Stam2_0009000
mmu-miR-212-3p	mmu_Arhgap17_0014000
mmu-miR-212-3p	mmu_chr6_1019000
mmu-miR-212-3p	mmu_Trappc9_0025000
mmu-miR-212-3p	mmu_Ptpn4_0022000
mmu-miR-212-3p	mmu_Smc2_0011000
mmu-miR-212-3p	mmu_Tut7_0043000
mmu-miR-212-3p	mmu_Enthd1_0004000
mmu-miR-212-3p	mmu_Enthd1_0001000
mmu-miR-212-3p	mmu_Prpf40b_0006000
mmu-miR-212-3p	mmu_chr2_2364000
mmu-miR-212-3p	mmu_Zfp568_0008000
mmu-miR-212-3p	mmu_Zfp568_0006000
mmu-miR-212-3p	mmu_Golga1_0045000
mmu-miR-212-3p	mmu_4930593A02Rik_0044000
mmu-miR-212-3p	mmu_Sorl1_0022000
mmu-miR-212-3p	mmu_Cul4a_0018000
mmu-miR-212-3p	mmu_L3mbtl4_0015000
mmu-miR-212-3p	mmu_Nxph1_0006000
mmu-miR-212-3p	mmu_chr15_0655000
mmu-miR-212-3p	mmu_chr15_0656000
mmu-miR-212-3p	mmu_chr15_0659000
mmu-miR-212-3p	mmu_4930599N23Rik_0003000
mmu-miR-212-3p	mmu_Dnal1_0016000
mmu-miR-212-3p	mmu_Trappc9_0034000
mmu-miR-212-3p	mmu_Spag9_0042000
mmu-miR-212-3p	mmu_Dnal1_0014000
mmu-miR-212-3p	mmu_Patj_0104000
mmu-miR-212-3p	mmu_Patj_0109000
mmu-miR-212-3p	mmu_Arhgef38_0009000
mmu-miR-212-3p	mmu_Tlr2_0001000
mmu-miR-212-3p	mmu_Ptpn11_0008000
mmu-miR-212-3p	mmu_Atg4c_0027000
mmu-miR-212-3p	mmu_Rapgef5_0045000
mmu-miR-212-3p	mmu_Nlgn1_0071000
mmu-miR-212-3p	mmu_Plekha5_0042000
mmu-miR-212-3p	mmu_Cpped1_0006000
mmu-miR-212-3p	mmu_Cpped1_0009000
mmu-miR-212-3p	mmu_Vti1a_0015000
mmu-miR-212-3p	mmu_Vti1a_0012000
mmu-miR-212-3p	mmu_Ahctf1_0003000
mmu-miR-212-3p	mmu_Acy3_0001000
mmu-miR-212-3p	mmu_Dop1a_0041000
mmu-miR-212-3p	mmu_Sh3gl3_0009000
mmu-miR-212-3p	mmu_Fabp1_0007000
mmu-miR-212-3p	mmu_Gltp_0003000
mmu-miR-212-3p	mmu_Igfbp3_0002000
mmu-miR-212-3p	mmu_Gm1043_0011000
mmu-miR-212-3p	mmu_chr17_0855000
mmu-miR-212-3p	mmu_Srgap2_0026000
mmu-miR-212-3p	mmu_Rapgef6_0014000
mmu-miR-212-3p	mmu_Unc13c_0074000
mmu-miR-212-3p	mmu_Unc13c_0066000
mmu-miR-212-3p	mmu_Dbndd1_0001000
mmu-miR-212-3p	mmu_Zc2hc1a_0001000
mmu-miR-212-3p	mmu_Zc2hc1a_0006000
mmu-miR-212-3p	mmu_Zc2hc1a_0002000
mmu-miR-212-3p	mmu_Zc2hc1a_0005000
mmu-miR-212-3p	mmu_Cenpo_0001000
mmu-miR-212-3p	mmu_Kyat3_0001000
mmu-miR-212-3p	mmu_Ubqln1_0018000
mmu-miR-212-3p	mmu_Taf1d_0003000
mmu-miR-212-3p	mmu_Crim1_0038000
mmu-miR-212-3p	mmu_Ctnna1_0021000
mmu-miR-212-3p	mmu_Ctnna1_0022000
mmu-miR-212-3p	mmu_Ctnna1_0023000
mmu-miR-212-3p	mmu_Myo1f_0006000
mmu-miR-212-3p	mmu_Lzts2_0001000
mmu-miR-212-3p	mmu_chr11_2031000
mmu-miR-212-3p	mmu_Col6a2_0029000
mmu-miR-212-3p	mmu_Lrrfip2_0067000
mmu-miR-212-3p	mmu_Lrrfip2_0071000
mmu-miR-212-3p	mmu_Snd1_0040000
mmu-miR-212-3p	mmu_Slc27a2_0006000
mmu-miR-212-3p	mmu_Slu7_0011000
mmu-miR-212-3p	mmu_Uggt2_0081000
mmu-miR-212-3p	mmu_Cep350_0022000
mmu-miR-212-3p	mmu_Nudt9_0009000
mmu-miR-212-3p	mmu_chr13_0962000
mmu-miR-212-3p	mmu_Carmil2_0007000
mmu-miR-212-3p	mmu_Tnr_0010000
mmu-miR-212-3p	mmu_Parva_0018000
mmu-miR-212-3p	mmu_Spag9_0016000
mmu-miR-212-3p	mmu_Spag9_0051000
mmu-miR-212-3p	mmu_Spag9_0063000
mmu-miR-212-3p	mmu_Spag9_0064000
mmu-miR-212-3p	mmu_Spag9_0065000
mmu-miR-212-3p	mmu_Spag9_0067000
mmu-miR-212-3p	mmu_Sfxn5_0024000
mmu-miR-212-3p	mmu_Snrnp200_0033000
mmu-miR-212-3p	mmu_Nasp_0017000
mmu-miR-212-3p	mmu_Phactr4_0021000
mmu-miR-212-3p	mmu_Adgre5_0007000
mmu-miR-212-3p	mmu_Cntnap5b_0053000
mmu-miR-212-3p	mmu_Cntnap5b_0055000
mmu-miR-212-3p	mmu_Drc1_0004000
mmu-miR-212-3p	mmu_4930593A02Rik_0052000
mmu-miR-212-3p	mmu_chrX_1043000
mmu-miR-212-3p	mmu_Gpbp1l1_0016000
mmu-miR-212-3p	mmu_Msra_0011000
mmu-miR-212-3p	mmu_Ubn1_0014000
mmu-miR-212-3p	mmu_Gm25200_0002000
mmu-miR-212-3p	mmu_Aak1_0049000
mmu-miR-212-3p	mmu_Mtus1_0006000
mmu-miR-212-3p	mmu_Nrg3_0030000
mmu-miR-212-3p	mmu_Pvalb_0001000
mmu-miR-212-3p	mmu_Cnbd2_0009000
mmu-miR-212-3p	mmu_Rrp12_0002000
mmu-miR-212-3p	mmu_Faim_0006000
mmu-miR-212-3p	mmu_Tut4_0081000
mmu-miR-212-3p	mmu_Stam2_0009000
mmu-miR-212-3p	mmu_Arhgap17_0014000
mmu-miR-212-3p	mmu_chr6_1019000
mmu-miR-212-3p	mmu_Trappc9_0025000
mmu-miR-212-3p	mmu_Ptpn4_0022000
mmu-miR-212-3p	mmu_Smc2_0011000
mmu-miR-212-3p	mmu_Tut7_0043000
mmu-miR-212-3p	mmu_Enthd1_0004000
mmu-miR-212-3p	mmu_Enthd1_0001000
mmu-miR-212-3p	mmu_Prpf40b_0006000
mmu-miR-212-3p	mmu_chr2_2364000
mmu-miR-212-3p	mmu_Zfp568_0008000
mmu-miR-212-3p	mmu_Zfp568_0006000
mmu-miR-212-3p	mmu_Golga1_0045000
mmu-miR-212-3p	mmu_4930593A02Rik_0044000
mmu-miR-212-3p	mmu_Sorl1_0022000
mmu-miR-212-3p	mmu_Cul4a_0018000
mmu-miR-212-3p	mmu_L3mbtl4_0015000
mmu-miR-212-3p	mmu_Nxph1_0006000
mmu-miR-212-3p	mmu_chr15_0655000
mmu-miR-212-3p	mmu_chr15_0656000
mmu-miR-212-3p	mmu_chr15_0659000
mmu-miR-212-3p	mmu_4930599N23Rik_0003000
mmu-miR-212-3p	mmu_Dnal1_0016000
mmu-miR-212-3p	mmu_Trappc9_0034000
mmu-miR-212-3p	mmu_Spag9_0042000
mmu-miR-212-3p	mmu_Dnal1_0014000
mmu-miR-212-3p	mmu_Patj_0104000
mmu-miR-212-3p	mmu_Patj_0109000
mmu-miR-212-3p	mmu_Arhgef38_0009000
mmu-miR-212-3p	mmu_Tlr2_0001000
mmu-miR-212-3p	mmu_Ptpn11_0008000
mmu-miR-212-3p	mmu_Atg4c_0027000
mmu-miR-212-3p	mmu_Rapgef5_0045000
mmu-miR-212-3p	mmu_Nlgn1_0071000
mmu-miR-212-3p	mmu_Plekha5_0042000
mmu-miR-212-3p	mmu_Cpped1_0006000
mmu-miR-212-3p	mmu_Cpped1_0009000
mmu-miR-212-3p	mmu_Vti1a_0015000
mmu-miR-212-3p	mmu_Vti1a_0012000
mmu-miR-212-3p	mmu_Ahctf1_0003000
mmu-miR-212-3p	mmu_Acy3_0001000
mmu-miR-212-3p	mmu_Dop1a_0041000
mmu-miR-212-3p	mmu_Sh3gl3_0009000
mmu-miR-212-3p	mmu_Fabp1_0007000
mmu-miR-212-3p	mmu_Gltp_0003000
mmu-miR-212-3p	mmu_Igfbp3_0002000
mmu-miR-212-3p	mmu_Gm1043_0011000
mmu-miR-212-3p	mmu_chr17_0855000
mmu-miR-212-3p	mmu_Srgap2_0026000
mmu-miR-212-3p	mmu_Rapgef6_0014000
mmu-miR-212-3p	mmu_Unc13c_0074000
mmu-miR-212-3p	mmu_Unc13c_0066000
mmu-miR-212-3p	mmu_Dbndd1_0001000
mmu-miR-212-3p	mmu_Zc2hc1a_0001000
mmu-miR-212-3p	mmu_Zc2hc1a_0006000
mmu-miR-212-3p	mmu_Zc2hc1a_0002000
mmu-miR-212-3p	mmu_Zc2hc1a_0005000
mmu-miR-212-3p	mmu_Cenpo_0001000
mmu-miR-212-3p	mmu_Kyat3_0001000
mmu-miR-212-3p	mmu_Ubqln1_0018000
mmu-miR-212-3p	mmu_Taf1d_0003000
mmu-miR-212-3p	mmu_Crim1_0038000
mmu-miR-212-3p	mmu_Ctnna1_0021000
mmu-miR-212-3p	mmu_Ctnna1_0022000
mmu-miR-212-3p	mmu_Ctnna1_0023000
mmu-miR-212-3p	mmu_Myo1f_0006000
mmu-miR-212-3p	mmu_Lzts2_0001000
mmu-miR-212-3p	mmu_chr11_2031000
mmu-miR-212-3p	mmu_Col6a2_0029000
mmu-miR-212-3p	mmu_Lrrfip2_0067000
mmu-miR-212-3p	mmu_Lrrfip2_0071000
mmu-miR-212-3p	mmu_Snd1_0040000
mmu-miR-212-3p	mmu_Slc27a2_0006000
mmu-miR-212-3p	mmu_Slu7_0011000
mmu-miR-212-3p	mmu_Uggt2_0081000
mmu-miR-212-3p	mmu_Cep350_0022000
mmu-miR-212-3p	mmu_Nudt9_0009000
mmu-miR-212-3p	mmu_chr13_0962000
mmu-miR-212-3p	mmu_Carmil2_0007000
mmu-miR-212-3p	mmu_Tnr_0010000
mmu-miR-212-3p	mmu_Parva_0018000
mmu-miR-212-3p	mmu_Spag9_0016000
mmu-miR-212-3p	mmu_Spag9_0051000
mmu-miR-212-3p	mmu_Spag9_0063000
mmu-miR-212-3p	mmu_Spag9_0064000
mmu-miR-212-3p	mmu_Spag9_0065000
mmu-miR-212-3p	mmu_Spag9_0067000
mmu-miR-212-3p	mmu_Sfxn5_0024000
mmu-miR-212-3p	mmu_Snrnp200_0033000
mmu-miR-212-3p	mmu_Nasp_0017000
mmu-miR-212-3p	mmu_Phactr4_0021000
mmu-miR-212-3p	mmu_Adgre5_0007000
mmu-miR-212-3p	mmu_Cntnap5b_0053000
mmu-miR-212-3p	mmu_Cntnap5b_0055000
mmu-miR-212-3p	mmu_Drc1_0004000
mmu-miR-212-3p	mmu_4930593A02Rik_0052000
mmu-miR-125b-5p	mmu_Man1a2_0052000
mmu-miR-125b-5p	mmu_Adamts19_0026000
mmu-miR-125b-5p	mmu_Cnbd2_0009000
mmu-miR-125b-5p	mmu_Zdhhc1_0002000
mmu-miR-125b-5p	mmu_Wnt9b_0001000
mmu-miR-125b-5p	mmu_Magi1_0109000
mmu-miR-125b-5p	mmu_chr9_1895000
mmu-miR-125b-5p	mmu_Kif21a_0031000
mmu-miR-125b-5p	mmu_Kif21a_0006000
mmu-miR-125b-5p	mmu_Kif21a_0026000
mmu-miR-125b-5p	mmu_Kif21a_0028000
mmu-miR-125b-5p	mmu_Kif21a_0029000
mmu-miR-125b-5p	mmu_Kif21a_0002000
mmu-miR-125b-5p	mmu_Kif21a_0018000
mmu-miR-125b-5p	mmu_Kif21a_0012000
mmu-miR-125b-5p	mmu_Kif21a_0016000
mmu-miR-125b-5p	mmu_Acsl3_0025000
mmu-miR-125b-5p	mmu_Slc38a3_0005000
mmu-miR-125b-5p	mmu_Trappc9_0065000
mmu-miR-125b-5p	mmu_Mpdz_0003000
mmu-miR-125b-5p	mmu_Zfp704_0006000
mmu-miR-125b-5p	mmu_Zfp704_0016000
mmu-miR-125b-5p	mmu_Cryz_0008000
mmu-miR-125b-5p	mmu_Nudt9_0002000
mmu-miR-125b-5p	mmu_Camta1_0020000
mmu-miR-125b-5p	mmu_Mndal_0016000
mmu-miR-125b-5p	mmu_Ifi203_0007000
mmu-miR-125b-5p	mmu_Atp6v0a4_0011000
mmu-miR-125b-5p	mmu_Shank3_0014000
mmu-miR-125b-5p	mmu_Shank3_0020000
mmu-miR-125b-5p	mmu_Shank3_0015000
mmu-miR-125b-5p	mmu_Nudt9_0009000
mmu-miR-125b-5p	mmu_Drc1_0003000
mmu-miR-125b-5p	mmu_Man1a2_0052000
mmu-miR-125b-5p	mmu_Adamts19_0026000
mmu-miR-125b-5p	mmu_Cnbd2_0009000
mmu-miR-125b-5p	mmu_Zdhhc1_0002000
mmu-miR-125b-5p	mmu_Wnt9b_0001000
mmu-miR-125b-5p	mmu_Magi1_0109000
mmu-miR-125b-5p	mmu_chr9_1895000
mmu-miR-125b-5p	mmu_Kif21a_0031000
mmu-miR-125b-5p	mmu_Kif21a_0006000
mmu-miR-125b-5p	mmu_Kif21a_0026000
mmu-miR-125b-5p	mmu_Kif21a_0028000
mmu-miR-125b-5p	mmu_Kif21a_0029000
mmu-miR-125b-5p	mmu_Kif21a_0002000
mmu-miR-125b-5p	mmu_Kif21a_0018000
mmu-miR-125b-5p	mmu_Kif21a_0012000
mmu-miR-125b-5p	mmu_Kif21a_0016000
mmu-miR-125b-5p	mmu_Acsl3_0025000
mmu-miR-125b-5p	mmu_Slc38a3_0005000
mmu-miR-125b-5p	mmu_Trappc9_0065000
mmu-miR-125b-5p	mmu_Mpdz_0003000
mmu-miR-125b-5p	mmu_Zfp704_0006000
mmu-miR-125b-5p	mmu_Zfp704_0016000
mmu-miR-125b-5p	mmu_Cryz_0008000
mmu-miR-125b-5p	mmu_Nudt9_0002000
mmu-miR-125b-5p	mmu_Camta1_0020000
mmu-miR-125b-5p	mmu_Mndal_0016000
mmu-miR-125b-5p	mmu_Ifi203_0007000
mmu-miR-125b-5p	mmu_Atp6v0a4_0011000
mmu-miR-125b-5p	mmu_Shank3_0014000
mmu-miR-125b-5p	mmu_Shank3_0020000
mmu-miR-125b-5p	mmu_Shank3_0015000
mmu-miR-125b-5p	mmu_Nudt9_0009000
mmu-miR-125b-5p	mmu_Drc1_0003000
mmu-miR-351-5p	mmu_chr6_2007000
mmu-miR-351-5p	mmu_chr2_3108000
mmu-miR-351-5p	mmu_Adamtsl3_0019000
mmu-miR-351-5p	mmu_Gm15506_0001000
mmu-miR-351-5p	mmu_Cyp2j9_0005000
mmu-miR-351-5p	mmu_Pon3_0006000
mmu-miR-351-5p	mmu_Herc3_0003000
mmu-miR-351-5p	mmu_Gm25200_0002000
mmu-miR-351-5p	mmu_chr5_0299000
mmu-miR-351-5p	mmu_Aak1_0048000
mmu-miR-351-5p	mmu_Mgat4a_0033000
mmu-miR-351-5p	mmu_Nrap_0026000
mmu-miR-351-5p	mmu_Nrap_0025000
mmu-miR-351-5p	mmu_Nek4_0013000
mmu-miR-351-5p	mmu_Nek4_0014000
mmu-miR-351-5p	mmu_Akap17b_0009000
mmu-miR-351-5p	mmu_Akap17b_0011000
mmu-miR-351-5p	mmu_Pvalb_0001000
mmu-miR-351-5p	mmu_Ccdc66_0024000
mmu-miR-351-5p	mmu_chr1_0676000
mmu-miR-351-5p	mmu_Mndal_0003000
mmu-miR-351-5p	mmu_Mndal_0004000
mmu-miR-351-5p	mmu_Mndal_0013000
mmu-miR-351-5p	mmu_Gapvd1_0007000
mmu-miR-351-5p	mmu_Immp2l_0018000
mmu-miR-351-5p	mmu_Immp2l_0021000
mmu-miR-351-5p	mmu_Bach2it1_0001000
mmu-miR-351-5p	mmu_Stam2_0015000
mmu-miR-351-5p	mmu_Trdn_0086000
mmu-miR-351-5p	mmu_Rpl22_0001000
mmu-miR-351-5p	mmu_Slc25a40_0007000
mmu-miR-351-5p	mmu_Trappc9_0025000
mmu-miR-351-5p	mmu_chr8_0130000
mmu-miR-351-5p	mmu_chr10_0106000
mmu-miR-351-5p	mmu_Cabcoco1_0004000
mmu-miR-351-5p	mmu_chr5_2373000
mmu-miR-351-5p	mmu_chr14_0218000
mmu-miR-351-5p	mmu_Fyn_0021000
mmu-miR-351-5p	mmu_Iqsec1_0017000
mmu-miR-351-5p	mmu_Pcdhga4_0001000
mmu-miR-351-5p	mmu_Gm15169_0001000
mmu-miR-351-5p	mmu_chr14_1753000
mmu-miR-351-5p	mmu_chrX_0506000
mmu-miR-351-5p	mmu_Dzip1l_0004000
mmu-miR-351-5p	mmu_Dzip1l_0007000
mmu-miR-351-5p	mmu_Prpf40b_0006000
mmu-miR-351-5p	mmu_B630019A10Rik_0001000
mmu-miR-351-5p	mmu_Zfp568_0008000
mmu-miR-351-5p	mmu_Zfp568_0006000
mmu-miR-351-5p	mmu_Zfp568_0007000
mmu-miR-351-5p	mmu_Ubac1_0018000
mmu-miR-351-5p	mmu_Csmd2_0066000
mmu-miR-351-5p	mmu_Dnaic2_0007000
mmu-miR-351-5p	mmu_Dsp_0019000
mmu-miR-351-5p	mmu_Dsp_0020000
mmu-miR-351-5p	mmu_C4b_0017000
mmu-miR-351-5p	mmu_Ubr1_0036000
mmu-miR-351-5p	mmu_Ubr1_0030000
mmu-miR-351-5p	mmu_Kif21a_0016000
mmu-miR-351-5p	mmu_chrX_0934000
mmu-miR-351-5p	mmu_Bbs4_0016000
mmu-miR-351-5p	mmu_Mrps35_0005000
mmu-miR-351-5p	mmu_chr18_0843000
mmu-miR-351-5p	mmu_Luc7l_0020000
mmu-miR-351-5p	mmu_Lrp1b_0179000
mmu-miR-351-5p	mmu_Lrp1b_0169000
mmu-miR-351-5p	mmu_B130055M24Rik_0001000
mmu-miR-351-5p	mmu_Pign_0055000
mmu-miR-351-5p	mmu_Ddx11_0002000
mmu-miR-351-5p	mmu_Nup133_0021000
mmu-miR-351-5p	mmu_Brd7_0009000
mmu-miR-351-5p	mmu_Ifnar1_0003000
mmu-miR-351-5p	mmu_Catspere1_0025000
mmu-miR-351-5p	mmu_Naaladl2_0008000
mmu-miR-351-5p	mmu_Mga_0069000
mmu-miR-351-5p	mmu_Trappc9_0065000
mmu-miR-351-5p	mmu_Cdk19_0022000
mmu-miR-351-5p	mmu_Cdk19_0023000
mmu-miR-351-5p	mmu_Arhgef38_0009000
mmu-miR-351-5p	mmu_Pum3_0019000
mmu-miR-351-5p	mmu_Ptpn11_0008000
mmu-miR-351-5p	mmu_chr7_2891000
mmu-miR-351-5p	mmu_Dock9_0067000
mmu-miR-351-5p	mmu_Cdkal1_0036000
mmu-miR-351-5p	mmu_Cdkal1_0049000
mmu-miR-351-5p	mmu_chr14_1456000
mmu-miR-351-5p	mmu_Gm37165_0002000
mmu-miR-351-5p	mmu_chr12_0537000
mmu-miR-351-5p	mmu_Camk2g_0003000
mmu-miR-351-5p	mmu_Camk2g_0007000
mmu-miR-351-5p	mmu_Obscn_0050000
mmu-miR-351-5p	mmu_Gm15318_0001000
mmu-miR-351-5p	mmu_chr4_0596000
mmu-miR-351-5p	mmu_chr16_0098000
mmu-miR-351-5p	mmu_Megf11_0012000
mmu-miR-351-5p	mmu_Dop1a_0042000
mmu-miR-351-5p	mmu_Efcab5_0036000
mmu-miR-351-5p	mmu_Top1_0022000
mmu-miR-351-5p	mmu_Top1_0048000
mmu-miR-351-5p	mmu_Atp2a2_0033000
mmu-miR-351-5p	mmu_Dip2c_0029000
mmu-miR-351-5p	mmu_Dip2c_0028000
mmu-miR-351-5p	mmu_Tmcc2_0005000
mmu-miR-351-5p	mmu_Ick_0020000
mmu-miR-351-5p	mmu_Syne3_0006000
mmu-miR-351-5p	mmu_Syne3_0004000
mmu-miR-351-5p	mmu_Ttc21b_0035000
mmu-miR-351-5p	mmu_Ywhab_0002000
mmu-miR-351-5p	mmu_Unc13c_0074000
mmu-miR-351-5p	mmu_Unc13c_0066000
mmu-miR-351-5p	mmu_chr3_0541000
mmu-miR-351-5p	mmu_chr17_0631000
mmu-miR-351-5p	mmu_chr10_1177000
mmu-miR-351-5p	mmu_Ryr1_0020000
mmu-miR-351-5p	mmu_Gspt1_0040000
mmu-miR-351-5p	mmu_Gspt1_0029000
mmu-miR-351-5p	mmu_Gspt1_0014000
mmu-miR-351-5p	mmu_Gspt1_0006000
mmu-miR-351-5p	mmu_Col3a1_0067000
mmu-miR-351-5p	mmu_Yes1_0006000
mmu-miR-351-5p	mmu_Slc25a12_0015000
mmu-miR-351-5p	mmu_Mtg1_0006000
mmu-miR-351-5p	mmu_Mtg1_0004000
mmu-miR-351-5p	mmu_Slc25a25_0001000
mmu-miR-351-5p	mmu_Apaf1_0029000
mmu-miR-351-5p	mmu_Ercc4_0007000
mmu-miR-351-5p	mmu_Ctnna1_0021000
mmu-miR-351-5p	mmu_Ctnna1_0022000
mmu-miR-351-5p	mmu_Klhdc7a_0001000
mmu-miR-351-5p	mmu_Ube2cbp_0017000
mmu-miR-351-5p	mmu_Col19a1_0039000
mmu-miR-351-5p	mmu_chr7_1874000
mmu-miR-351-5p	mmu_Xaf1_0001000
mmu-miR-351-5p	mmu_Tmem50a_0003000
mmu-miR-351-5p	mmu_Tmem50a_0013000
mmu-miR-351-5p	mmu_Atp2a1_0020000
mmu-miR-351-5p	mmu_Bptf_0050000
mmu-miR-351-5p	mmu_Invs_0017000
mmu-miR-351-5p	mmu_Nup205_0078000
mmu-miR-351-5p	mmu_Airn_0009000
mmu-miR-351-5p	mmu_Gtf3c2_0012000
mmu-miR-351-5p	mmu_Gm28052_0010000
mmu-miR-351-5p	mmu_chr14_1248000
mmu-miR-351-5p	mmu_Smarcal1_0019000
mmu-miR-351-5p	mmu_Fip1l1_0046000
mmu-miR-351-5p	mmu_Fip1l1_0047000
mmu-miR-351-5p	mmu_chr16_0909000
mmu-miR-351-5p	mmu_chr12_0845000
mmu-miR-351-5p	mmu_Auts2_0050000
mmu-miR-351-5p	mmu_Dpp6_0057000
mmu-miR-351-5p	mmu_Dpp6_0058000
mmu-miR-351-5p	mmu_Col6a1_0024000
mmu-miR-351-5p	mmu_Epb41l4b_0062000
mmu-miR-351-5p	mmu_Epb41_0065000
mmu-miR-351-5p	mmu_Epb41_0041000
mmu-miR-351-5p	mmu_Epb41_0032000
mmu-miR-351-5p	mmu_Epb41_0061000
mmu-miR-351-5p	mmu_chr14_0643000
mmu-miR-351-5p	mmu_chr15_0975000
mmu-miR-351-5p	mmu_Iqgap1_0039000
mmu-miR-351-5p	mmu_Cep350_0022000
mmu-miR-351-5p	mmu_Shank3_0017000
mmu-miR-351-5p	mmu_chr18_0889000
mmu-miR-351-5p	mmu_H13_0007000
mmu-miR-351-5p	mmu_Ccnk_0012000
mmu-miR-351-5p	mmu_Dgcr8_0001000
mmu-miR-351-5p	mmu_Armc2_0017000
mmu-miR-351-5p	mmu_C2cd3_0006000
mmu-miR-351-5p	mmu_chr10_0532000
mmu-miR-351-5p	mmu_Gnptg_0002000
mmu-miR-351-5p	mmu_Cabin1_0012000
mmu-miR-351-5p	mmu_Shank2_0026000
mmu-miR-351-5p	mmu_Ttc19_0017000
mmu-miR-351-5p	mmu_Wdr59_0024000
mmu-miR-351-5p	mmu_Drosha_0023000
mmu-miR-351-5p	mmu_Kif9_0024000
mmu-miR-351-5p	mmu_Esyt2_0063000
mmu-miR-351-5p	mmu_Ptk2_0014000
mmu-miR-351-5p	mmu_Wdfy3_0025000
mmu-miR-351-5p	mmu_Rbm20_0018000
mmu-miR-351-5p	mmu_Patj_0110000
mmu-miR-351-5p	mmu_Parva_0017000
mmu-miR-351-5p	mmu_Clk4_0016000
mmu-miR-351-5p	mmu_Clk4_0025000
mmu-miR-351-5p	mmu_Agbl4_0052000
mmu-miR-351-5p	mmu_Rere_0067000
mmu-miR-351-5p	mmu_Nasp_0017000
mmu-miR-351-5p	mmu_Phactr4_0018000
mmu-miR-351-5p	mmu_chr11_1089000
mmu-miR-351-5p	mmu_Scn1a_0005000
mmu-miR-351-5p	mmu_Il1r1_0007000
mmu-miR-351-5p	mmu_Ehmt1_0106000
mmu-miR-351-5p	mmu_Ubr4_0069000
mmu-miR-351-5p	mmu_Trp53bp1_0030000
mmu-miR-351-5p	mmu_Trp53bp1_0021000
mmu-miR-351-5p	mmu_Eef2k_0007000
mmu-miR-351-5p	mmu_Camk1d_0023000
mmu-miR-351-5p	mmu_Fto_0003000
mmu-miR-351-5p	mmu_Fto_0011000
mmu-miR-351-5p	mmu_Fto_0001000
mmu-miR-351-5p	mmu_chr16_0623000
mmu-miR-351-5p	mmu_Anks6_0007000
mmu-miR-351-5p	mmu_Anks6_0010000
mmu-miR-351-5p	mmu_Fam118b_0001000
mmu-miR-351-5p	mmu_Fam118b_0007000
mmu-miR-351-5p	mmu_chr6_2007000
mmu-miR-351-5p	mmu_chr2_3108000
mmu-miR-351-5p	mmu_Adamtsl3_0019000
mmu-miR-351-5p	mmu_Gm15506_0001000
mmu-miR-351-5p	mmu_Cyp2j9_0005000
mmu-miR-351-5p	mmu_Pon3_0006000
mmu-miR-351-5p	mmu_Herc3_0003000
mmu-miR-351-5p	mmu_Gm25200_0002000
mmu-miR-351-5p	mmu_chr5_0299000
mmu-miR-351-5p	mmu_Aak1_0048000
mmu-miR-351-5p	mmu_Mgat4a_0033000
mmu-miR-351-5p	mmu_Nrap_0026000
mmu-miR-351-5p	mmu_Nrap_0025000
mmu-miR-351-5p	mmu_Nek4_0013000
mmu-miR-351-5p	mmu_Nek4_0014000
mmu-miR-351-5p	mmu_Akap17b_0009000
mmu-miR-351-5p	mmu_Akap17b_0011000
mmu-miR-351-5p	mmu_Pvalb_0001000
mmu-miR-351-5p	mmu_Ccdc66_0024000
mmu-miR-351-5p	mmu_chr1_0676000
mmu-miR-351-5p	mmu_Mndal_0003000
mmu-miR-351-5p	mmu_Mndal_0004000
mmu-miR-351-5p	mmu_Mndal_0013000
mmu-miR-351-5p	mmu_Gapvd1_0007000
mmu-miR-351-5p	mmu_Immp2l_0018000
mmu-miR-351-5p	mmu_Immp2l_0021000
mmu-miR-351-5p	mmu_Bach2it1_0001000
mmu-miR-351-5p	mmu_Stam2_0015000
mmu-miR-351-5p	mmu_Trdn_0086000
mmu-miR-351-5p	mmu_Rpl22_0001000
mmu-miR-351-5p	mmu_Slc25a40_0007000
mmu-miR-351-5p	mmu_Trappc9_0025000
mmu-miR-351-5p	mmu_chr8_0130000
mmu-miR-351-5p	mmu_chr10_0106000
mmu-miR-351-5p	mmu_Cabcoco1_0004000
mmu-miR-351-5p	mmu_chr5_2373000
mmu-miR-351-5p	mmu_chr14_0218000
mmu-miR-351-5p	mmu_Fyn_0021000
mmu-miR-351-5p	mmu_Iqsec1_0017000
mmu-miR-351-5p	mmu_Pcdhga4_0001000
mmu-miR-351-5p	mmu_Gm15169_0001000
mmu-miR-351-5p	mmu_chr14_1753000
mmu-miR-351-5p	mmu_chrX_0506000
mmu-miR-351-5p	mmu_Dzip1l_0004000
mmu-miR-351-5p	mmu_Dzip1l_0007000
mmu-miR-351-5p	mmu_Prpf40b_0006000
mmu-miR-351-5p	mmu_B630019A10Rik_0001000
mmu-miR-351-5p	mmu_Zfp568_0008000
mmu-miR-351-5p	mmu_Zfp568_0006000
mmu-miR-351-5p	mmu_Zfp568_0007000
mmu-miR-351-5p	mmu_Ubac1_0018000
mmu-miR-351-5p	mmu_Csmd2_0066000
mmu-miR-351-5p	mmu_Dnaic2_0007000
mmu-miR-351-5p	mmu_Dsp_0019000
mmu-miR-351-5p	mmu_Dsp_0020000
mmu-miR-351-5p	mmu_C4b_0017000
mmu-miR-351-5p	mmu_Ubr1_0036000
mmu-miR-351-5p	mmu_Ubr1_0030000
mmu-miR-351-5p	mmu_Kif21a_0016000
mmu-miR-351-5p	mmu_chrX_0934000
mmu-miR-351-5p	mmu_Bbs4_0016000
mmu-miR-351-5p	mmu_Mrps35_0005000
mmu-miR-351-5p	mmu_chr18_0843000
mmu-miR-351-5p	mmu_Luc7l_0020000
mmu-miR-351-5p	mmu_Lrp1b_0179000
mmu-miR-351-5p	mmu_Lrp1b_0169000
mmu-miR-351-5p	mmu_B130055M24Rik_0001000
mmu-miR-351-5p	mmu_Pign_0055000
mmu-miR-351-5p	mmu_Ddx11_0002000
mmu-miR-351-5p	mmu_Nup133_0021000
mmu-miR-351-5p	mmu_Brd7_0009000
mmu-miR-351-5p	mmu_Ifnar1_0003000
mmu-miR-351-5p	mmu_Catspere1_0025000
mmu-miR-351-5p	mmu_Naaladl2_0008000
mmu-miR-351-5p	mmu_Mga_0069000
mmu-miR-351-5p	mmu_Trappc9_0065000
mmu-miR-351-5p	mmu_Cdk19_0022000
mmu-miR-351-5p	mmu_Cdk19_0023000
mmu-miR-351-5p	mmu_Arhgef38_0009000
mmu-miR-351-5p	mmu_Pum3_0019000
mmu-miR-351-5p	mmu_Ptpn11_0008000
mmu-miR-351-5p	mmu_chr7_2891000
mmu-miR-351-5p	mmu_Dock9_0067000
mmu-miR-351-5p	mmu_Cdkal1_0036000
mmu-miR-351-5p	mmu_Cdkal1_0049000
mmu-miR-351-5p	mmu_chr14_1456000
mmu-miR-351-5p	mmu_Gm37165_0002000
mmu-miR-351-5p	mmu_chr12_0537000
mmu-miR-351-5p	mmu_Camk2g_0003000
mmu-miR-351-5p	mmu_Camk2g_0007000
mmu-miR-351-5p	mmu_Obscn_0050000
mmu-miR-351-5p	mmu_Gm15318_0001000
mmu-miR-351-5p	mmu_chr4_0596000
mmu-miR-351-5p	mmu_chr16_0098000
mmu-miR-351-5p	mmu_Megf11_0012000
mmu-miR-351-5p	mmu_Dop1a_0042000
mmu-miR-351-5p	mmu_Efcab5_0036000
mmu-miR-351-5p	mmu_Top1_0022000
mmu-miR-351-5p	mmu_Top1_0048000
mmu-miR-351-5p	mmu_Atp2a2_0033000
mmu-miR-351-5p	mmu_Dip2c_0029000
mmu-miR-351-5p	mmu_Dip2c_0028000
mmu-miR-351-5p	mmu_Tmcc2_0005000
mmu-miR-351-5p	mmu_Ick_0020000
mmu-miR-351-5p	mmu_Syne3_0006000
mmu-miR-351-5p	mmu_Syne3_0004000
mmu-miR-351-5p	mmu_Ttc21b_0035000
mmu-miR-351-5p	mmu_Ywhab_0002000
mmu-miR-351-5p	mmu_Unc13c_0074000
mmu-miR-351-5p	mmu_Unc13c_0066000
mmu-miR-351-5p	mmu_chr3_0541000
mmu-miR-351-5p	mmu_chr17_0631000
mmu-miR-351-5p	mmu_chr10_1177000
mmu-miR-351-5p	mmu_Ryr1_0020000
mmu-miR-351-5p	mmu_Gspt1_0040000
mmu-miR-351-5p	mmu_Gspt1_0029000
mmu-miR-351-5p	mmu_Gspt1_0014000
mmu-miR-351-5p	mmu_Gspt1_0006000
mmu-miR-351-5p	mmu_Col3a1_0067000
mmu-miR-351-5p	mmu_Yes1_0006000
mmu-miR-351-5p	mmu_Slc25a12_0015000
mmu-miR-351-5p	mmu_Mtg1_0006000
mmu-miR-351-5p	mmu_Mtg1_0004000
mmu-miR-351-5p	mmu_Slc25a25_0001000
mmu-miR-351-5p	mmu_Apaf1_0029000
mmu-miR-351-5p	mmu_Ercc4_0007000
mmu-miR-351-5p	mmu_Ctnna1_0021000
mmu-miR-351-5p	mmu_Ctnna1_0022000
mmu-miR-351-5p	mmu_Klhdc7a_0001000
mmu-miR-351-5p	mmu_Ube2cbp_0017000
mmu-miR-351-5p	mmu_Col19a1_0039000
mmu-miR-351-5p	mmu_chr7_1874000
mmu-miR-351-5p	mmu_Xaf1_0001000
mmu-miR-351-5p	mmu_Tmem50a_0003000
mmu-miR-351-5p	mmu_Tmem50a_0013000
mmu-miR-351-5p	mmu_Atp2a1_0020000
mmu-miR-351-5p	mmu_Bptf_0050000
mmu-miR-351-5p	mmu_Invs_0017000
mmu-miR-351-5p	mmu_Nup205_0078000
mmu-miR-351-5p	mmu_Airn_0009000
mmu-miR-351-5p	mmu_Gtf3c2_0012000
mmu-miR-351-5p	mmu_Gm28052_0010000
mmu-miR-351-5p	mmu_chr14_1248000
mmu-miR-351-5p	mmu_Smarcal1_0019000
mmu-miR-351-5p	mmu_Fip1l1_0046000
mmu-miR-351-5p	mmu_Fip1l1_0047000
mmu-miR-351-5p	mmu_chr16_0909000
mmu-miR-351-5p	mmu_chr12_0845000
mmu-miR-351-5p	mmu_Auts2_0050000
mmu-miR-351-5p	mmu_Dpp6_0057000
mmu-miR-351-5p	mmu_Dpp6_0058000
mmu-miR-351-5p	mmu_Col6a1_0024000
mmu-miR-351-5p	mmu_Epb41l4b_0062000
mmu-miR-351-5p	mmu_Epb41_0065000
mmu-miR-351-5p	mmu_Epb41_0041000
mmu-miR-351-5p	mmu_Epb41_0032000
mmu-miR-351-5p	mmu_Epb41_0061000
mmu-miR-351-5p	mmu_chr14_0643000
mmu-miR-351-5p	mmu_chr15_0975000
mmu-miR-351-5p	mmu_Iqgap1_0039000
mmu-miR-351-5p	mmu_Cep350_0022000
mmu-miR-351-5p	mmu_Shank3_0017000
mmu-miR-351-5p	mmu_chr18_0889000
mmu-miR-351-5p	mmu_H13_0007000
mmu-miR-351-5p	mmu_Ccnk_0012000
mmu-miR-351-5p	mmu_Dgcr8_0001000
mmu-miR-351-5p	mmu_Armc2_0017000
mmu-miR-351-5p	mmu_C2cd3_0006000
mmu-miR-351-5p	mmu_chr10_0532000
mmu-miR-351-5p	mmu_Gnptg_0002000
mmu-miR-351-5p	mmu_Cabin1_0012000
mmu-miR-351-5p	mmu_Shank2_0026000
mmu-miR-351-5p	mmu_Ttc19_0017000
mmu-miR-351-5p	mmu_Wdr59_0024000
mmu-miR-351-5p	mmu_Drosha_0023000
mmu-miR-351-5p	mmu_Kif9_0024000
mmu-miR-351-5p	mmu_Esyt2_0063000
mmu-miR-351-5p	mmu_Ptk2_0014000
mmu-miR-351-5p	mmu_Wdfy3_0025000
mmu-miR-351-5p	mmu_Rbm20_0018000
mmu-miR-351-5p	mmu_Patj_0110000
mmu-miR-351-5p	mmu_Parva_0017000
mmu-miR-351-5p	mmu_Clk4_0016000
mmu-miR-351-5p	mmu_Clk4_0025000
mmu-miR-351-5p	mmu_Agbl4_0052000
mmu-miR-351-5p	mmu_Rere_0067000
mmu-miR-351-5p	mmu_Nasp_0017000
mmu-miR-351-5p	mmu_Phactr4_0018000
mmu-miR-351-5p	mmu_chr11_1089000
mmu-miR-351-5p	mmu_Scn1a_0005000
mmu-miR-351-5p	mmu_Il1r1_0007000
mmu-miR-351-5p	mmu_Ehmt1_0106000
mmu-miR-351-5p	mmu_Ubr4_0069000
mmu-miR-351-5p	mmu_Trp53bp1_0030000
mmu-miR-351-5p	mmu_Trp53bp1_0021000
mmu-miR-351-5p	mmu_Eef2k_0007000
mmu-miR-351-5p	mmu_Camk1d_0023000
mmu-miR-351-5p	mmu_Fto_0003000
mmu-miR-351-5p	mmu_Fto_0011000
mmu-miR-351-5p	mmu_Fto_0001000
mmu-miR-351-5p	mmu_chr16_0623000
mmu-miR-351-5p	mmu_Anks6_0007000
mmu-miR-351-5p	mmu_Anks6_0010000
mmu-miR-351-5p	mmu_Fam118b_0001000
mmu-miR-351-5p	mmu_Fam118b_0007000
mmu-miR-212-3p	mmu_chrX_1043000
mmu-miR-212-3p	mmu_Gpbp1l1_0016000
mmu-miR-212-3p	mmu_Msra_0011000
mmu-miR-212-3p	mmu_Ubn1_0014000
mmu-miR-212-3p	mmu_Gm25200_0002000
mmu-miR-212-3p	mmu_Aak1_0049000
mmu-miR-212-3p	mmu_Mtus1_0006000
mmu-miR-212-3p	mmu_Nrg3_0030000
mmu-miR-212-3p	mmu_Pvalb_0001000
mmu-miR-212-3p	mmu_Cnbd2_0009000
mmu-miR-212-3p	mmu_Rrp12_0002000
mmu-miR-212-3p	mmu_Faim_0006000
mmu-miR-212-3p	mmu_Tut4_0081000
mmu-miR-212-3p	mmu_Stam2_0009000
mmu-miR-212-3p	mmu_Arhgap17_0014000
mmu-miR-212-3p	mmu_chr6_1019000
mmu-miR-212-3p	mmu_Trappc9_0025000
mmu-miR-212-3p	mmu_Ptpn4_0022000
mmu-miR-212-3p	mmu_Smc2_0011000
mmu-miR-212-3p	mmu_Tut7_0043000
mmu-miR-212-3p	mmu_Enthd1_0004000
mmu-miR-212-3p	mmu_Enthd1_0001000
mmu-miR-212-3p	mmu_Prpf40b_0006000
mmu-miR-212-3p	mmu_chr2_2364000
mmu-miR-212-3p	mmu_Zfp568_0008000
mmu-miR-212-3p	mmu_Zfp568_0006000
mmu-miR-212-3p	mmu_Golga1_0045000
mmu-miR-212-3p	mmu_4930593A02Rik_0044000
mmu-miR-212-3p	mmu_Sorl1_0022000
mmu-miR-212-3p	mmu_Cul4a_0018000
mmu-miR-212-3p	mmu_L3mbtl4_0015000
mmu-miR-212-3p	mmu_Nxph1_0006000
mmu-miR-212-3p	mmu_chr15_0655000
mmu-miR-212-3p	mmu_chr15_0656000
mmu-miR-212-3p	mmu_chr15_0659000
mmu-miR-212-3p	mmu_4930599N23Rik_0003000
mmu-miR-212-3p	mmu_Dnal1_0016000
mmu-miR-212-3p	mmu_Trappc9_0034000
mmu-miR-212-3p	mmu_Spag9_0042000
mmu-miR-212-3p	mmu_Dnal1_0014000
mmu-miR-212-3p	mmu_Patj_0104000
mmu-miR-212-3p	mmu_Patj_0109000
mmu-miR-212-3p	mmu_Arhgef38_0009000
mmu-miR-212-3p	mmu_Tlr2_0001000
mmu-miR-212-3p	mmu_Ptpn11_0008000
mmu-miR-212-3p	mmu_Atg4c_0027000
mmu-miR-212-3p	mmu_Rapgef5_0045000
mmu-miR-212-3p	mmu_Nlgn1_0071000
mmu-miR-212-3p	mmu_Plekha5_0042000
mmu-miR-212-3p	mmu_Cpped1_0006000
mmu-miR-212-3p	mmu_Cpped1_0009000
mmu-miR-212-3p	mmu_Vti1a_0015000
mmu-miR-212-3p	mmu_Vti1a_0012000
mmu-miR-212-3p	mmu_Ahctf1_0003000
mmu-miR-212-3p	mmu_Acy3_0001000
mmu-miR-212-3p	mmu_Dop1a_0041000
mmu-miR-212-3p	mmu_Sh3gl3_0009000
mmu-miR-212-3p	mmu_Fabp1_0007000
mmu-miR-212-3p	mmu_Gltp_0003000
mmu-miR-212-3p	mmu_Igfbp3_0002000
mmu-miR-212-3p	mmu_Gm1043_0011000
mmu-miR-212-3p	mmu_chr17_0855000
mmu-miR-212-3p	mmu_Srgap2_0026000
mmu-miR-212-3p	mmu_Rapgef6_0014000
mmu-miR-212-3p	mmu_Unc13c_0074000
mmu-miR-212-3p	mmu_Unc13c_0066000
mmu-miR-212-3p	mmu_Dbndd1_0001000
mmu-miR-212-3p	mmu_Zc2hc1a_0001000
mmu-miR-212-3p	mmu_Zc2hc1a_0006000
mmu-miR-212-3p	mmu_Zc2hc1a_0002000
mmu-miR-212-3p	mmu_Zc2hc1a_0005000
mmu-miR-212-3p	mmu_Cenpo_0001000
mmu-miR-212-3p	mmu_Kyat3_0001000
mmu-miR-212-3p	mmu_Ubqln1_0018000
mmu-miR-212-3p	mmu_Taf1d_0003000
mmu-miR-212-3p	mmu_Crim1_0038000
mmu-miR-212-3p	mmu_Ctnna1_0021000
mmu-miR-212-3p	mmu_Ctnna1_0022000
mmu-miR-212-3p	mmu_Ctnna1_0023000
mmu-miR-212-3p	mmu_Myo1f_0006000
mmu-miR-212-3p	mmu_Lzts2_0001000
mmu-miR-212-3p	mmu_chr11_2031000
mmu-miR-212-3p	mmu_Col6a2_0029000
mmu-miR-212-3p	mmu_Lrrfip2_0067000
mmu-miR-212-3p	mmu_Lrrfip2_0071000
mmu-miR-212-3p	mmu_Snd1_0040000
mmu-miR-212-3p	mmu_Slc27a2_0006000
mmu-miR-212-3p	mmu_Slu7_0011000
mmu-miR-212-3p	mmu_Uggt2_0081000
mmu-miR-212-3p	mmu_Cep350_0022000
mmu-miR-212-3p	mmu_Nudt9_0009000
mmu-miR-212-3p	mmu_chr13_0962000
mmu-miR-212-3p	mmu_Carmil2_0007000
mmu-miR-212-3p	mmu_Tnr_0010000
mmu-miR-212-3p	mmu_Parva_0018000
mmu-miR-212-3p	mmu_Spag9_0016000
mmu-miR-212-3p	mmu_Spag9_0051000
mmu-miR-212-3p	mmu_Spag9_0063000
mmu-miR-212-3p	mmu_Spag9_0064000
mmu-miR-212-3p	mmu_Spag9_0065000
mmu-miR-212-3p	mmu_Spag9_0067000
mmu-miR-212-3p	mmu_Sfxn5_0024000
mmu-miR-212-3p	mmu_Snrnp200_0033000
mmu-miR-212-3p	mmu_Nasp_0017000
mmu-miR-212-3p	mmu_Phactr4_0021000
mmu-miR-212-3p	mmu_Adgre5_0007000
mmu-miR-212-3p	mmu_Cntnap5b_0053000
mmu-miR-212-3p	mmu_Cntnap5b_0055000
mmu-miR-212-3p	mmu_Drc1_0004000
mmu-miR-212-3p	mmu_4930593A02Rik_0052000
mmu-miR-212-3p	mmu_chrX_1043000
mmu-miR-212-3p	mmu_Gpbp1l1_0016000
mmu-miR-212-3p	mmu_Msra_0011000
mmu-miR-212-3p	mmu_Ubn1_0014000
mmu-miR-212-3p	mmu_Gm25200_0002000
mmu-miR-212-3p	mmu_Aak1_0049000
mmu-miR-212-3p	mmu_Mtus1_0006000
mmu-miR-212-3p	mmu_Nrg3_0030000
mmu-miR-212-3p	mmu_Pvalb_0001000
mmu-miR-212-3p	mmu_Cnbd2_0009000
mmu-miR-212-3p	mmu_Rrp12_0002000
mmu-miR-212-3p	mmu_Faim_0006000
mmu-miR-212-3p	mmu_Tut4_0081000
mmu-miR-212-3p	mmu_Stam2_0009000
mmu-miR-212-3p	mmu_Arhgap17_0014000
mmu-miR-212-3p	mmu_chr6_1019000
mmu-miR-212-3p	mmu_Trappc9_0025000
mmu-miR-212-3p	mmu_Ptpn4_0022000
mmu-miR-212-3p	mmu_Smc2_0011000
mmu-miR-212-3p	mmu_Tut7_0043000
mmu-miR-212-3p	mmu_Enthd1_0004000
mmu-miR-212-3p	mmu_Enthd1_0001000
mmu-miR-212-3p	mmu_Prpf40b_0006000
mmu-miR-212-3p	mmu_chr2_2364000
mmu-miR-212-3p	mmu_Zfp568_0008000
mmu-miR-212-3p	mmu_Zfp568_0006000
mmu-miR-212-3p	mmu_Golga1_0045000
mmu-miR-212-3p	mmu_4930593A02Rik_0044000
mmu-miR-212-3p	mmu_Sorl1_0022000
mmu-miR-212-3p	mmu_Cul4a_0018000
mmu-miR-212-3p	mmu_L3mbtl4_0015000
mmu-miR-212-3p	mmu_Nxph1_0006000
mmu-miR-212-3p	mmu_chr15_0655000
mmu-miR-212-3p	mmu_chr15_0656000
mmu-miR-212-3p	mmu_chr15_0659000
mmu-miR-212-3p	mmu_4930599N23Rik_0003000
mmu-miR-212-3p	mmu_Dnal1_0016000
mmu-miR-212-3p	mmu_Trappc9_0034000
mmu-miR-212-3p	mmu_Spag9_0042000
mmu-miR-212-3p	mmu_Dnal1_0014000
mmu-miR-212-3p	mmu_Patj_0104000
mmu-miR-212-3p	mmu_Patj_0109000
mmu-miR-212-3p	mmu_Arhgef38_0009000
mmu-miR-212-3p	mmu_Tlr2_0001000
mmu-miR-212-3p	mmu_Ptpn11_0008000
mmu-miR-212-3p	mmu_Atg4c_0027000
mmu-miR-212-3p	mmu_Rapgef5_0045000
mmu-miR-212-3p	mmu_Nlgn1_0071000
mmu-miR-212-3p	mmu_Plekha5_0042000
mmu-miR-212-3p	mmu_Cpped1_0006000
mmu-miR-212-3p	mmu_Cpped1_0009000
mmu-miR-212-3p	mmu_Vti1a_0015000
mmu-miR-212-3p	mmu_Vti1a_0012000
mmu-miR-212-3p	mmu_Ahctf1_0003000
mmu-miR-212-3p	mmu_Acy3_0001000
mmu-miR-212-3p	mmu_Dop1a_0041000
mmu-miR-212-3p	mmu_Sh3gl3_0009000
mmu-miR-212-3p	mmu_Fabp1_0007000
mmu-miR-212-3p	mmu_Gltp_0003000
mmu-miR-212-3p	mmu_Igfbp3_0002000
mmu-miR-212-3p	mmu_Gm1043_0011000
mmu-miR-212-3p	mmu_chr17_0855000
mmu-miR-212-3p	mmu_Srgap2_0026000
mmu-miR-212-3p	mmu_Rapgef6_0014000
mmu-miR-212-3p	mmu_Unc13c_0074000
mmu-miR-212-3p	mmu_Unc13c_0066000
mmu-miR-212-3p	mmu_Dbndd1_0001000
mmu-miR-212-3p	mmu_Zc2hc1a_0001000
mmu-miR-212-3p	mmu_Zc2hc1a_0006000
mmu-miR-212-3p	mmu_Zc2hc1a_0002000
mmu-miR-212-3p	mmu_Zc2hc1a_0005000
mmu-miR-212-3p	mmu_Cenpo_0001000
mmu-miR-212-3p	mmu_Kyat3_0001000
mmu-miR-212-3p	mmu_Ubqln1_0018000
mmu-miR-212-3p	mmu_Taf1d_0003000
mmu-miR-212-3p	mmu_Crim1_0038000
mmu-miR-212-3p	mmu_Ctnna1_0021000
mmu-miR-212-3p	mmu_Ctnna1_0022000
mmu-miR-212-3p	mmu_Ctnna1_0023000
mmu-miR-212-3p	mmu_Myo1f_0006000
mmu-miR-212-3p	mmu_Lzts2_0001000
mmu-miR-212-3p	mmu_chr11_2031000
mmu-miR-212-3p	mmu_Col6a2_0029000
mmu-miR-212-3p	mmu_Lrrfip2_0067000
mmu-miR-212-3p	mmu_Lrrfip2_0071000
mmu-miR-212-3p	mmu_Snd1_0040000
mmu-miR-212-3p	mmu_Slc27a2_0006000
mmu-miR-212-3p	mmu_Slu7_0011000
mmu-miR-212-3p	mmu_Uggt2_0081000
mmu-miR-212-3p	mmu_Cep350_0022000
mmu-miR-212-3p	mmu_Nudt9_0009000
mmu-miR-212-3p	mmu_chr13_0962000
mmu-miR-212-3p	mmu_Carmil2_0007000
mmu-miR-212-3p	mmu_Tnr_0010000
mmu-miR-212-3p	mmu_Parva_0018000
mmu-miR-212-3p	mmu_Spag9_0016000
mmu-miR-212-3p	mmu_Spag9_0051000
mmu-miR-212-3p	mmu_Spag9_0063000
mmu-miR-212-3p	mmu_Spag9_0064000
mmu-miR-212-3p	mmu_Spag9_0065000
mmu-miR-212-3p	mmu_Spag9_0067000
mmu-miR-212-3p	mmu_Sfxn5_0024000
mmu-miR-212-3p	mmu_Snrnp200_0033000
mmu-miR-212-3p	mmu_Nasp_0017000
mmu-miR-212-3p	mmu_Phactr4_0021000
mmu-miR-212-3p	mmu_Adgre5_0007000
mmu-miR-212-3p	mmu_Cntnap5b_0053000
mmu-miR-212-3p	mmu_Cntnap5b_0055000
mmu-miR-212-3p	mmu_Drc1_0004000
mmu-miR-212-3p	mmu_4930593A02Rik_0052000
mmu-miR-133c	mmu_chr7_0263000
mmu-miR-133c	mmu_Herc3_0001000
mmu-miR-133c	mmu_Fndc3b_0054000
mmu-miR-133c	mmu_chr4_1246000
mmu-miR-133c	mmu_Arhgap44_0026000
mmu-miR-133c	mmu_Arhgap44_0028000
mmu-miR-133c	mmu_Arhgap44_0024000
mmu-miR-133c	mmu_Arhgap44_0021000
mmu-miR-133c	mmu_chr8_0130000
mmu-miR-133c	mmu_Tmem116_0009000
mmu-miR-133c	mmu_Anks3_0011000
mmu-miR-133c	mmu_Enthd1_0001000
mmu-miR-133c	mmu_Spin1_0016000
mmu-miR-133c	mmu_Clmn_0009000
mmu-miR-133c	mmu_Gucy1b1_0003000
mmu-miR-133c	mmu_chr15_0659000
mmu-miR-133c	mmu_Ints4_0029000
mmu-miR-133c	mmu_Ppm1e_0020000
mmu-miR-133c	mmu_Ptms_0030000
mmu-miR-133c	mmu_Slc38a3_0005000
mmu-miR-133c	mmu_chr2_1677000
mmu-miR-133c	mmu_Cwf19l2_0045000
mmu-miR-133c	mmu_Dhx37_0005000
mmu-miR-133c	mmu_Dnajc28_0001000
mmu-miR-133c	mmu_Rin2_0017000
mmu-miR-133c	mmu_Ahi1_0011000
mmu-miR-133c	mmu_Gltp_0003000
mmu-miR-133c	mmu_Atp2a2_0033000
mmu-miR-133c	mmu_Ttc21b_0035000
mmu-miR-133c	mmu_Chd4_0005000
mmu-miR-133c	mmu_chr3_0541000
mmu-miR-133c	mmu_Avil_0001000
mmu-miR-133c	mmu_Adamts17_0035000
mmu-miR-133c	mmu_D7Ertd443e_0002000
mmu-miR-133c	mmu_Themis_0020000
mmu-miR-133c	mmu_Eml1_0037000
mmu-miR-133c	mmu_chr2_1230000
mmu-miR-133c	mmu_Atp2a1_0002000
mmu-miR-133c	mmu_Parp9_0002000
mmu-miR-133c	mmu_Col6a2_0029000
mmu-miR-133c	mmu_chr9_1251000
mmu-miR-133c	mmu_Cep350_0003000
mmu-miR-133c	mmu_Cep350_0025000
mmu-miR-133c	mmu_Cep350_0022000
mmu-miR-133c	mmu_Cep350_0008000
mmu-miR-133c	mmu_Shank3_0017000
mmu-miR-133c	mmu_Shank3_0019000
mmu-miR-133c	mmu_Ptprk_0029000
mmu-miR-133c	mmu_Stk38_0013000
mmu-miR-133c	mmu_Rere_0067000
mmu-miR-133c	mmu_Trp53bp1_0001000
mmu-miR-133c	mmu_chr17_2006000
mmu-miR-133c	mmu_Eef2k_0007000
mmu-miR-133c	mmu_Camk1d_0023000
mmu-miR-133c	mmu_Bdp1_0018000
mmu-miR-133c	mmu_Bdp1_0025000
mmu-miR-133c	mmu_Bdp1_0022000
mmu-miR-133c	mmu_Fto_0003000
mmu-miR-133c	mmu_Fto_0011000
mmu-miR-133c	mmu_Fto_0001000
mmu-miR-133c	mmu_Rsrc1_0041000
mmu-miR-7077-5p	mmu_chr2_1517000
mmu-miR-7077-5p	mmu_Ahrr_0004000
mmu-miR-7077-5p	mmu_Wipf1_0002000
mmu-miR-7077-5p	mmu_Gpbp1l1_0016000
mmu-miR-7077-5p	mmu_Secisbp2_0010000
mmu-miR-7077-5p	mmu_Kat6a_0039000
mmu-miR-7077-5p	mmu_chr10_1893000
mmu-miR-7077-5p	mmu_Slc24a2_0015000
mmu-miR-7077-5p	mmu_Herc3_0003000
mmu-miR-7077-5p	mmu_Herc3_0002000
mmu-miR-7077-5p	mmu_Trrap_0003000
mmu-miR-7077-5p	mmu_chr1_2063000
mmu-miR-7077-5p	mmu_chr12_0786000
mmu-miR-7077-5p	mmu_Kdm3a_0026000
mmu-miR-7077-5p	mmu_Gm48448_0001000
mmu-miR-7077-5p	mmu_Rbm19_0004000
mmu-miR-7077-5p	mmu_Dnajc13_0044000
mmu-miR-7077-5p	mmu_Nrap_0026000
mmu-miR-7077-5p	mmu_Nrap_0025000
mmu-miR-7077-5p	mmu_Nrap_0023000
mmu-miR-7077-5p	mmu_Slc25a20_0002000
mmu-miR-7077-5p	mmu_Slc25a20_0001000
mmu-miR-7077-5p	mmu_Mllt10_0042000
mmu-miR-7077-5p	mmu_Mllt10_0110000
mmu-miR-7077-5p	mmu_Mllt10_0109000
mmu-miR-7077-5p	mmu_Zdhhc1_0002000
mmu-miR-7077-5p	mmu_Immp2l_0018000
mmu-miR-7077-5p	mmu_Immp2l_0021000
mmu-miR-7077-5p	mmu_Cmip_0013000
mmu-miR-7077-5p	mmu_Cmip_0018000
mmu-miR-7077-5p	mmu_Bach2it1_0002000
mmu-miR-7077-5p	mmu_Bach2it1_0003000
mmu-miR-7077-5p	mmu_Gm9733_0002000
mmu-miR-7077-5p	mmu_Arhgap17_0024000
mmu-miR-7077-5p	mmu_Sars_0008000
mmu-miR-7077-5p	mmu_Gm13479_0008000
mmu-miR-7077-5p	mmu_5330417C22Rik_0015000
mmu-miR-7077-5p	mmu_5330417C22Rik_0014000
mmu-miR-7077-5p	mmu_5330417C22Rik_0007000
mmu-miR-7077-5p	mmu_Trappc9_0025000
mmu-miR-7077-5p	mmu_Tmem116_0009000
mmu-miR-7077-5p	mmu_Bcl11b_0022000
mmu-miR-7077-5p	mmu_Anks3_0011000
mmu-miR-7077-5p	mmu_Anks3_0004000
mmu-miR-7077-5p	mmu_Ubr2_0020000
mmu-miR-7077-5p	mmu_Ubr2_0016000
mmu-miR-7077-5p	mmu_1700007F19Rik_0002000
mmu-miR-7077-5p	mmu_Ddhd1_0026000
mmu-miR-7077-5p	mmu_chr7_0950000
mmu-miR-7077-5p	mmu_Iqsec1_0017000
mmu-miR-7077-5p	mmu_Enthd1_0004000
mmu-miR-7077-5p	mmu_Enthd1_0001000
mmu-miR-7077-5p	mmu_Clk2_0014000
mmu-miR-7077-5p	mmu_Prpf40b_0006000
mmu-miR-7077-5p	mmu_chr9_0567000
mmu-miR-7077-5p	mmu_Chd1l_0003000
mmu-miR-7077-5p	mmu_Ctnna2_0009000
mmu-miR-7077-5p	mmu_Csmd2_0066000
mmu-miR-7077-5p	mmu_Dnaic2_0007000
mmu-miR-7077-5p	mmu_Sorl1_0022000
mmu-miR-7077-5p	mmu_Fam234a_0002000
mmu-miR-7077-5p	mmu_C4b_0017000
mmu-miR-7077-5p	mmu_Slc16a14_0005000
mmu-miR-7077-5p	mmu_Slc16a14_0006000
mmu-miR-7077-5p	mmu_chr19_0094000
mmu-miR-7077-5p	mmu_chrX_0934000
mmu-miR-7077-5p	mmu_Washc3_0005000
mmu-miR-7077-5p	mmu_Ppm1e_0020000
mmu-miR-7077-5p	mmu_Cdh8_0031000
mmu-miR-7077-5p	mmu_Cdh8_0035000
mmu-miR-7077-5p	mmu_Sptlc2_0014000
mmu-miR-7077-5p	mmu_Trappc9_0034000
mmu-miR-7077-5p	mmu_Rsl1d1_0001000
mmu-miR-7077-5p	mmu_Pign_0055000
mmu-miR-7077-5p	mmu_Parg_0011000
mmu-miR-7077-5p	mmu_4930474H20Rik_0002000
mmu-miR-7077-5p	mmu_Arid5b_0011000
mmu-miR-7077-5p	mmu_Ifnar1_0004000
mmu-miR-7077-5p	mmu_Platr25_0002000
mmu-miR-7077-5p	mmu_Naaladl2_0008000
mmu-miR-7077-5p	mmu_Arhgef12_0064000
mmu-miR-7077-5p	mmu_Gucy1b1_0013000
mmu-miR-7077-5p	mmu_Trappc9_0065000
mmu-miR-7077-5p	mmu_Runx1t1_0011000
mmu-miR-7077-5p	mmu_chr6_1126000
mmu-miR-7077-5p	mmu_Rapgef5_0045000
mmu-miR-7077-5p	mmu_Stx18_0022000
mmu-miR-7077-5p	mmu_Stx18_0025000
mmu-miR-7077-5p	mmu_Fhod3_0016000
mmu-miR-7077-5p	mmu_Gm37165_0002000
mmu-miR-7077-5p	mmu_9530077C05Rik_0005000
mmu-miR-7077-5p	mmu_9530077C05Rik_0006000
mmu-miR-7077-5p	mmu_Camk2g_0003000
mmu-miR-7077-5p	mmu_Camk2g_0007000
mmu-miR-7077-5p	mmu_Gm12066_0001000
mmu-miR-7077-5p	mmu_chr5_1002000
mmu-miR-7077-5p	mmu_chr3_0248000
mmu-miR-7077-5p	mmu_Cpped1_0008000
mmu-miR-7077-5p	mmu_chr7_0040000
mmu-miR-7077-5p	mmu_Gm15155_0009000
mmu-miR-7077-5p	mmu_Fbp1_0005000
mmu-miR-7077-5p	mmu_Nsd1_0133000
mmu-miR-7077-5p	mmu_chr16_0098000
mmu-miR-7077-5p	mmu_Trappc9_0019000
mmu-miR-7077-5p	mmu_Trappc9_0032000
mmu-miR-7077-5p	mmu_Trappc9_0037000
mmu-miR-7077-5p	mmu_Wipf1_0007000
mmu-miR-7077-5p	mmu_Dhx9_0040000
mmu-miR-7077-5p	mmu_Sh3gl3_0011000
mmu-miR-7077-5p	mmu_Itgav_0013000
mmu-miR-7077-5p	mmu_Itgav_0014000
mmu-miR-7077-5p	mmu_Top1_0022000
mmu-miR-7077-5p	mmu_Top1_0048000
mmu-miR-7077-5p	mmu_Top1_0049000
mmu-miR-7077-5p	mmu_Gltp_0003000
mmu-miR-7077-5p	mmu_Ttll13_0003000
mmu-miR-7077-5p	mmu_Smyd2_0004000
mmu-miR-7077-5p	mmu_Phf21b_0007000
mmu-miR-7077-5p	mmu_Phf21b_0001000
mmu-miR-7077-5p	mmu_Lama1_0002000
mmu-miR-7077-5p	mmu_Gm2682_0008000
mmu-miR-7077-5p	mmu_Gm2682_0007000
mmu-miR-7077-5p	mmu_Arhgef2_0012000
mmu-miR-7077-5p	mmu_Piwil1_0011000
mmu-miR-7077-5p	mmu_Piwil1_0010000
mmu-miR-7077-5p	mmu_Piwil1_0006000
mmu-miR-7077-5p	mmu_Piwil1_0007000
mmu-miR-7077-5p	mmu_chr9_1401000
mmu-miR-7077-5p	mmu_Unc13c_0074000
mmu-miR-7077-5p	mmu_chr17_0631000
mmu-miR-7077-5p	mmu_Hao1_0016000
mmu-miR-7077-5p	mmu_Slc35a1_0004000
mmu-miR-7077-5p	mmu_Thrb_0029000
mmu-miR-7077-5p	mmu_Thrb_0031000
mmu-miR-7077-5p	mmu_Slc25a12_0026000
mmu-miR-7077-5p	mmu_Slc25a12_0015000
mmu-miR-7077-5p	mmu_Sec24b_0002000
mmu-miR-7077-5p	mmu_Slc25a46_0020000
mmu-miR-7077-5p	mmu_chr6_1641000
mmu-miR-7077-5p	mmu_Tgfbr3_0002000
mmu-miR-7077-5p	mmu_Ptpdc1_0008000
mmu-miR-7077-5p	mmu_Fap_0002000
mmu-miR-7077-5p	mmu_Gm14453_0001000
mmu-miR-7077-5p	mmu_Tcea1_0006000
mmu-miR-7077-5p	mmu_Adamts17_0035000
mmu-miR-7077-5p	mmu_Slc25a25_0005000
mmu-miR-7077-5p	mmu_Mefv_0001000
mmu-miR-7077-5p	mmu_Crim1_0036000
mmu-miR-7077-5p	mmu_Crim1_0037000
mmu-miR-7077-5p	mmu_Ctnna1_0021000
mmu-miR-7077-5p	mmu_Ctnna1_0022000
mmu-miR-7077-5p	mmu_Ptprk_0059000
mmu-miR-7077-5p	mmu_Klhdc7a_0001000
mmu-miR-7077-5p	mmu_chr10_1355000
mmu-miR-7077-5p	mmu_Ccdc162_0012000
mmu-miR-7077-5p	mmu_Cenpe_0018000
mmu-miR-7077-5p	mmu_Cog7_0026000
mmu-miR-7077-5p	mmu_Cog7_0022000
mmu-miR-7077-5p	mmu_Acbd3_0002000
mmu-miR-7077-5p	mmu_4930430A15Rik_0030000
mmu-miR-7077-5p	mmu_4930430A15Rik_0029000
mmu-miR-7077-5p	mmu_Cdh7_0039000
mmu-miR-7077-5p	mmu_Nop9_0004000
mmu-miR-7077-5p	mmu_Tmem243_0006000
mmu-miR-7077-5p	mmu_Epha7_0024000
mmu-miR-7077-5p	mmu_chr19_0191000
mmu-miR-7077-5p	mmu_Lzts2_0001000
mmu-miR-7077-5p	mmu_Gtf3c2_0012000
mmu-miR-7077-5p	mmu_Gtf3c2_0017000
mmu-miR-7077-5p	mmu_Gtf3c2_0016000
mmu-miR-7077-5p	mmu_Lrba_0090000
mmu-miR-7077-5p	mmu_Auts2_0012000
mmu-miR-7077-5p	mmu_Auts2_0005000
mmu-miR-7077-5p	mmu_Sema5a_0058000
mmu-miR-7077-5p	mmu_Sema5b_0008000
mmu-miR-7077-5p	mmu_Hspa12a_0007000
mmu-miR-7077-5p	mmu_Ttc17_0030000
mmu-miR-7077-5p	mmu_Parp9_0001000
mmu-miR-7077-5p	mmu_Parp9_0002000
mmu-miR-7077-5p	mmu_Aplf_0007000
mmu-miR-7077-5p	mmu_chr12_1088000
mmu-miR-7077-5p	mmu_Auts2_0050000
mmu-miR-7077-5p	mmu_Col6a1_0024000
mmu-miR-7077-5p	mmu_Lrrc8c_0004000
mmu-miR-7077-5p	mmu_Epb41l4b_0061000
mmu-miR-7077-5p	mmu_Epb41l4b_0034000
mmu-miR-7077-5p	mmu_Epb41_0041000
mmu-miR-7077-5p	mmu_Epb41_0032000
mmu-miR-7077-5p	mmu_Herc2_0073000
mmu-miR-7077-5p	mmu_Sdhaf2_0003000
mmu-miR-7077-5p	mmu_Gtf2ird1_0001000
mmu-miR-7077-5p	mmu_chr8_0025000
mmu-miR-7077-5p	mmu_Cdkl5_0025000
mmu-miR-7077-5p	mmu_Gtf3c2_0015000
mmu-miR-7077-5p	mmu_Shank3_0019000
mmu-miR-7077-5p	mmu_Shank3_0014000
mmu-miR-7077-5p	mmu_Shank3_0020000
mmu-miR-7077-5p	mmu_Shank3_0015000
mmu-miR-7077-5p	mmu_Shank3_0016000
mmu-miR-7077-5p	mmu_Kif3b_0003000
mmu-miR-7077-5p	mmu_Specc1_0049000
mmu-miR-7077-5p	mmu_Auts2_0009000
mmu-miR-7077-5p	mmu_chr16_1250000
mmu-miR-7077-5p	mmu_Msrb2_0001000
mmu-miR-7077-5p	mmu_Eif3b_0024000
mmu-miR-7077-5p	mmu_Gnptg_0002000
mmu-miR-7077-5p	mmu_Abhd3_0008000
mmu-miR-7077-5p	mmu_Spata3_0003000
mmu-miR-7077-5p	mmu_chr16_0664000
mmu-miR-7077-5p	mmu_Lgmn_0012000
mmu-miR-7077-5p	mmu_Nudt9_0009000
mmu-miR-7077-5p	mmu_Urb1_0002000
mmu-miR-7077-5p	mmu_Dhx30_0017000
mmu-miR-7077-5p	mmu_Adgrl3_0071000
mmu-miR-7077-5p	mmu_Tenm4_0047000
mmu-miR-7077-5p	mmu_Tenm4_0046000
mmu-miR-7077-5p	mmu_Tenm4_0042000
mmu-miR-7077-5p	mmu_chr13_0962000
mmu-miR-7077-5p	mmu_chr2_1441000
mmu-miR-7077-5p	mmu_Stox2_0015000
mmu-miR-7077-5p	mmu_Glis3_0006000
mmu-miR-7077-5p	mmu_Parva_0017000
mmu-miR-7077-5p	mmu_Apbb2_0022000
mmu-miR-7077-5p	mmu_chr11_0137000
mmu-miR-7077-5p	mmu_Tfcp2_0008000
mmu-miR-7077-5p	mmu_Spdya_0001000
mmu-miR-7077-5p	mmu_Dmxl2_0011000
mmu-miR-7077-5p	mmu_Arl13b_0008000
mmu-miR-7077-5p	mmu_Epb41l2_0010000
mmu-miR-7077-5p	mmu_Osgin2_0004000
mmu-miR-7077-5p	mmu_Osgin2_0003000
mmu-miR-7077-5p	mmu_Osgin2_0002000
mmu-miR-7077-5p	mmu_Depdc5_0024000
mmu-miR-7077-5p	mmu_chr16_0089000
mmu-miR-7077-5p	mmu_Cyp4v3_0010000
mmu-miR-7077-5p	mmu_Arfgef2_0010000
mmu-miR-7077-5p	mmu_Arfgef2_0011000
mmu-miR-7077-5p	mmu_Nsdhl_0005000
mmu-miR-7077-5p	mmu_Lrig1_0004000
mmu-miR-7077-5p	mmu_Zfp598_0002000
mmu-miR-7077-5p	mmu_Eef2k_0007000
mmu-miR-7077-5p	mmu_Snapc3_0020000
mmu-miR-7077-5p	mmu_Mtmr4_0010000
mmu-miR-7077-5p	mmu_Drc1_0003000
mmu-miR-7077-5p	mmu_Drc1_0004000
mmu-miR-7077-5p	mmu_Drc1_0005000
mmu-miR-7077-5p	mmu_4930593A02Rik_0038000
mmu-miR-7077-5p	mmu_4930593A02Rik_0054000
mmu-miR-7077-5p	mmu_Sergef_0016000
mmu-miR-7077-5p	mmu_Sergef_0023000
mmu-miR-7077-5p	mmu_Sergef_0025000
mmu-miR-7077-5p	mmu_Sergef_0024000
mmu-miR-7077-5p	mmu_Sergef_0022000
mmu-miR-7077-5p	mmu_Focad_0027000
mmu-miR-7077-5p	mmu_Focad_0015000
mmu-miR-7077-5p	mmu_Focad_0030000
mmu-miR-7077-5p	mmu_chr2_1517000
mmu-miR-7077-5p	mmu_Ahrr_0004000
mmu-miR-7077-5p	mmu_Wipf1_0002000
mmu-miR-7077-5p	mmu_Gpbp1l1_0016000
mmu-miR-7077-5p	mmu_Secisbp2_0010000
mmu-miR-7077-5p	mmu_Kat6a_0039000
mmu-miR-7077-5p	mmu_chr10_1893000
mmu-miR-7077-5p	mmu_Slc24a2_0015000
mmu-miR-7077-5p	mmu_Herc3_0003000
mmu-miR-7077-5p	mmu_Herc3_0002000
mmu-miR-7077-5p	mmu_Trrap_0003000
mmu-miR-7077-5p	mmu_chr1_2063000
mmu-miR-7077-5p	mmu_chr12_0786000
mmu-miR-7077-5p	mmu_Kdm3a_0026000
mmu-miR-7077-5p	mmu_Gm48448_0001000
mmu-miR-7077-5p	mmu_Rbm19_0004000
mmu-miR-7077-5p	mmu_Dnajc13_0044000
mmu-miR-7077-5p	mmu_Nrap_0026000
mmu-miR-7077-5p	mmu_Nrap_0025000
mmu-miR-7077-5p	mmu_Nrap_0023000
mmu-miR-7077-5p	mmu_Slc25a20_0002000
mmu-miR-7077-5p	mmu_Slc25a20_0001000
mmu-miR-7077-5p	mmu_Mllt10_0042000
mmu-miR-7077-5p	mmu_Mllt10_0110000
mmu-miR-7077-5p	mmu_Mllt10_0109000
mmu-miR-7077-5p	mmu_Zdhhc1_0002000
mmu-miR-7077-5p	mmu_Immp2l_0018000
mmu-miR-7077-5p	mmu_Immp2l_0021000
mmu-miR-7077-5p	mmu_Cmip_0013000
mmu-miR-7077-5p	mmu_Cmip_0018000
mmu-miR-7077-5p	mmu_Bach2it1_0002000
mmu-miR-7077-5p	mmu_Bach2it1_0003000
mmu-miR-7077-5p	mmu_Gm9733_0002000
mmu-miR-7077-5p	mmu_Arhgap17_0024000
mmu-miR-7077-5p	mmu_Sars_0008000
mmu-miR-7077-5p	mmu_Gm13479_0008000
mmu-miR-7077-5p	mmu_5330417C22Rik_0015000
mmu-miR-7077-5p	mmu_5330417C22Rik_0014000
mmu-miR-7077-5p	mmu_5330417C22Rik_0007000
mmu-miR-7077-5p	mmu_Trappc9_0025000
mmu-miR-7077-5p	mmu_Tmem116_0009000
mmu-miR-7077-5p	mmu_Bcl11b_0022000
mmu-miR-7077-5p	mmu_Anks3_0011000
mmu-miR-7077-5p	mmu_Anks3_0004000
mmu-miR-7077-5p	mmu_Ubr2_0020000
mmu-miR-7077-5p	mmu_Ubr2_0016000
mmu-miR-7077-5p	mmu_1700007F19Rik_0002000
mmu-miR-7077-5p	mmu_Ddhd1_0026000
mmu-miR-7077-5p	mmu_chr7_0950000
mmu-miR-7077-5p	mmu_Iqsec1_0017000
mmu-miR-7077-5p	mmu_Enthd1_0004000
mmu-miR-7077-5p	mmu_Enthd1_0001000
mmu-miR-7077-5p	mmu_Clk2_0014000
mmu-miR-7077-5p	mmu_Prpf40b_0006000
mmu-miR-7077-5p	mmu_chr9_0567000
mmu-miR-7077-5p	mmu_Chd1l_0003000
mmu-miR-7077-5p	mmu_Ctnna2_0009000
mmu-miR-7077-5p	mmu_Csmd2_0066000
mmu-miR-7077-5p	mmu_Dnaic2_0007000
mmu-miR-7077-5p	mmu_Sorl1_0022000
mmu-miR-7077-5p	mmu_Fam234a_0002000
mmu-miR-7077-5p	mmu_C4b_0017000
mmu-miR-7077-5p	mmu_Slc16a14_0005000
mmu-miR-7077-5p	mmu_Slc16a14_0006000
mmu-miR-7077-5p	mmu_chr19_0094000
mmu-miR-7077-5p	mmu_chrX_0934000
mmu-miR-7077-5p	mmu_Washc3_0005000
mmu-miR-7077-5p	mmu_Ppm1e_0020000
mmu-miR-7077-5p	mmu_Cdh8_0031000
mmu-miR-7077-5p	mmu_Cdh8_0035000
mmu-miR-7077-5p	mmu_Sptlc2_0014000
mmu-miR-7077-5p	mmu_Trappc9_0034000
mmu-miR-7077-5p	mmu_Rsl1d1_0001000
mmu-miR-7077-5p	mmu_Pign_0055000
mmu-miR-7077-5p	mmu_Parg_0011000
mmu-miR-7077-5p	mmu_4930474H20Rik_0002000
mmu-miR-7077-5p	mmu_Arid5b_0011000
mmu-miR-7077-5p	mmu_Ifnar1_0004000
mmu-miR-7077-5p	mmu_Platr25_0002000
mmu-miR-7077-5p	mmu_Naaladl2_0008000
mmu-miR-7077-5p	mmu_Arhgef12_0064000
mmu-miR-7077-5p	mmu_Gucy1b1_0013000
mmu-miR-7077-5p	mmu_Trappc9_0065000
mmu-miR-7077-5p	mmu_Runx1t1_0011000
mmu-miR-7077-5p	mmu_chr6_1126000
mmu-miR-7077-5p	mmu_Rapgef5_0045000
mmu-miR-7077-5p	mmu_Stx18_0022000
mmu-miR-7077-5p	mmu_Stx18_0025000
mmu-miR-7077-5p	mmu_Fhod3_0016000
mmu-miR-7077-5p	mmu_Gm37165_0002000
mmu-miR-7077-5p	mmu_9530077C05Rik_0005000
mmu-miR-7077-5p	mmu_9530077C05Rik_0006000
mmu-miR-7077-5p	mmu_Camk2g_0003000
mmu-miR-7077-5p	mmu_Camk2g_0007000
mmu-miR-7077-5p	mmu_Gm12066_0001000
mmu-miR-7077-5p	mmu_chr5_1002000
mmu-miR-7077-5p	mmu_chr3_0248000
mmu-miR-7077-5p	mmu_Cpped1_0008000
mmu-miR-7077-5p	mmu_chr7_0040000
mmu-miR-7077-5p	mmu_Gm15155_0009000
mmu-miR-7077-5p	mmu_Fbp1_0005000
mmu-miR-7077-5p	mmu_Nsd1_0133000
mmu-miR-7077-5p	mmu_chr16_0098000
mmu-miR-7077-5p	mmu_Trappc9_0019000
mmu-miR-7077-5p	mmu_Trappc9_0032000
mmu-miR-7077-5p	mmu_Trappc9_0037000
mmu-miR-7077-5p	mmu_Wipf1_0007000
mmu-miR-7077-5p	mmu_Dhx9_0040000
mmu-miR-7077-5p	mmu_Sh3gl3_0011000
mmu-miR-7077-5p	mmu_Itgav_0013000
mmu-miR-7077-5p	mmu_Itgav_0014000
mmu-miR-7077-5p	mmu_Top1_0022000
mmu-miR-7077-5p	mmu_Top1_0048000
mmu-miR-7077-5p	mmu_Top1_0049000
mmu-miR-7077-5p	mmu_Gltp_0003000
mmu-miR-7077-5p	mmu_Ttll13_0003000
mmu-miR-7077-5p	mmu_Smyd2_0004000
mmu-miR-7077-5p	mmu_Phf21b_0007000
mmu-miR-7077-5p	mmu_Phf21b_0001000
mmu-miR-7077-5p	mmu_Lama1_0002000
mmu-miR-7077-5p	mmu_Gm2682_0008000
mmu-miR-7077-5p	mmu_Gm2682_0007000
mmu-miR-7077-5p	mmu_Arhgef2_0012000
mmu-miR-7077-5p	mmu_Piwil1_0011000
mmu-miR-7077-5p	mmu_Piwil1_0010000
mmu-miR-7077-5p	mmu_Piwil1_0006000
mmu-miR-7077-5p	mmu_Piwil1_0007000
mmu-miR-7077-5p	mmu_chr9_1401000
mmu-miR-7077-5p	mmu_Unc13c_0074000
mmu-miR-7077-5p	mmu_chr17_0631000
mmu-miR-7077-5p	mmu_Hao1_0016000
mmu-miR-7077-5p	mmu_Slc35a1_0004000
mmu-miR-7077-5p	mmu_Thrb_0029000
mmu-miR-7077-5p	mmu_Thrb_0031000
mmu-miR-7077-5p	mmu_Slc25a12_0026000
mmu-miR-7077-5p	mmu_Slc25a12_0015000
mmu-miR-7077-5p	mmu_Sec24b_0002000
mmu-miR-7077-5p	mmu_Slc25a46_0020000
mmu-miR-7077-5p	mmu_chr6_1641000
mmu-miR-7077-5p	mmu_Tgfbr3_0002000
mmu-miR-7077-5p	mmu_Ptpdc1_0008000
mmu-miR-7077-5p	mmu_Fap_0002000
mmu-miR-7077-5p	mmu_Gm14453_0001000
mmu-miR-7077-5p	mmu_Tcea1_0006000
mmu-miR-7077-5p	mmu_Adamts17_0035000
mmu-miR-7077-5p	mmu_Slc25a25_0005000
mmu-miR-7077-5p	mmu_Mefv_0001000
mmu-miR-7077-5p	mmu_Crim1_0036000
mmu-miR-7077-5p	mmu_Crim1_0037000
mmu-miR-7077-5p	mmu_Ctnna1_0021000
mmu-miR-7077-5p	mmu_Ctnna1_0022000
mmu-miR-7077-5p	mmu_Ptprk_0059000
mmu-miR-7077-5p	mmu_Klhdc7a_0001000
mmu-miR-7077-5p	mmu_chr10_1355000
mmu-miR-7077-5p	mmu_Ccdc162_0012000
mmu-miR-7077-5p	mmu_Cenpe_0018000
mmu-miR-7077-5p	mmu_Cog7_0026000
mmu-miR-7077-5p	mmu_Cog7_0022000
mmu-miR-7077-5p	mmu_Acbd3_0002000
mmu-miR-7077-5p	mmu_4930430A15Rik_0030000
mmu-miR-7077-5p	mmu_4930430A15Rik_0029000
mmu-miR-7077-5p	mmu_Cdh7_0039000
mmu-miR-7077-5p	mmu_Nop9_0004000
mmu-miR-7077-5p	mmu_Tmem243_0006000
mmu-miR-7077-5p	mmu_Epha7_0024000
mmu-miR-7077-5p	mmu_chr19_0191000
mmu-miR-7077-5p	mmu_Lzts2_0001000
mmu-miR-7077-5p	mmu_Gtf3c2_0012000
mmu-miR-7077-5p	mmu_Gtf3c2_0017000
mmu-miR-7077-5p	mmu_Gtf3c2_0016000
mmu-miR-7077-5p	mmu_Lrba_0090000
mmu-miR-7077-5p	mmu_Auts2_0012000
mmu-miR-7077-5p	mmu_Auts2_0005000
mmu-miR-7077-5p	mmu_Sema5a_0058000
mmu-miR-7077-5p	mmu_Sema5b_0008000
mmu-miR-7077-5p	mmu_Hspa12a_0007000
mmu-miR-7077-5p	mmu_Ttc17_0030000
mmu-miR-7077-5p	mmu_Parp9_0001000
mmu-miR-7077-5p	mmu_Parp9_0002000
mmu-miR-7077-5p	mmu_Aplf_0007000
mmu-miR-7077-5p	mmu_chr12_1088000
mmu-miR-7077-5p	mmu_Auts2_0050000
mmu-miR-7077-5p	mmu_Col6a1_0024000
mmu-miR-7077-5p	mmu_Lrrc8c_0004000
mmu-miR-7077-5p	mmu_Epb41l4b_0061000
mmu-miR-7077-5p	mmu_Epb41l4b_0034000
mmu-miR-7077-5p	mmu_Epb41_0041000
mmu-miR-7077-5p	mmu_Epb41_0032000
mmu-miR-7077-5p	mmu_Herc2_0073000
mmu-miR-7077-5p	mmu_Sdhaf2_0003000
mmu-miR-7077-5p	mmu_Gtf2ird1_0001000
mmu-miR-7077-5p	mmu_chr8_0025000
mmu-miR-7077-5p	mmu_Cdkl5_0025000
mmu-miR-7077-5p	mmu_Gtf3c2_0015000
mmu-miR-7077-5p	mmu_Shank3_0019000
mmu-miR-7077-5p	mmu_Shank3_0014000
mmu-miR-7077-5p	mmu_Shank3_0020000
mmu-miR-7077-5p	mmu_Shank3_0015000
mmu-miR-7077-5p	mmu_Shank3_0016000
mmu-miR-7077-5p	mmu_Kif3b_0003000
mmu-miR-7077-5p	mmu_Specc1_0049000
mmu-miR-7077-5p	mmu_Auts2_0009000
mmu-miR-7077-5p	mmu_chr16_1250000
mmu-miR-7077-5p	mmu_Msrb2_0001000
mmu-miR-7077-5p	mmu_Eif3b_0024000
mmu-miR-7077-5p	mmu_Gnptg_0002000
mmu-miR-7077-5p	mmu_Abhd3_0008000
mmu-miR-7077-5p	mmu_Spata3_0003000
mmu-miR-7077-5p	mmu_chr16_0664000
mmu-miR-7077-5p	mmu_Lgmn_0012000
mmu-miR-7077-5p	mmu_Nudt9_0009000
mmu-miR-7077-5p	mmu_Urb1_0002000
mmu-miR-7077-5p	mmu_Dhx30_0017000
mmu-miR-7077-5p	mmu_Adgrl3_0071000
mmu-miR-7077-5p	mmu_Tenm4_0047000
mmu-miR-7077-5p	mmu_Tenm4_0046000
mmu-miR-7077-5p	mmu_Tenm4_0042000
mmu-miR-7077-5p	mmu_chr13_0962000
mmu-miR-7077-5p	mmu_chr2_1441000
mmu-miR-7077-5p	mmu_Stox2_0015000
mmu-miR-7077-5p	mmu_Glis3_0006000
mmu-miR-7077-5p	mmu_Parva_0017000
mmu-miR-7077-5p	mmu_Apbb2_0022000
mmu-miR-7077-5p	mmu_chr11_0137000
mmu-miR-7077-5p	mmu_Tfcp2_0008000
mmu-miR-7077-5p	mmu_Spdya_0001000
mmu-miR-7077-5p	mmu_Dmxl2_0011000
mmu-miR-7077-5p	mmu_Arl13b_0008000
mmu-miR-7077-5p	mmu_Epb41l2_0010000
mmu-miR-7077-5p	mmu_Osgin2_0004000
mmu-miR-7077-5p	mmu_Osgin2_0003000
mmu-miR-7077-5p	mmu_Osgin2_0002000
mmu-miR-7077-5p	mmu_Depdc5_0024000
mmu-miR-7077-5p	mmu_chr16_0089000
mmu-miR-7077-5p	mmu_Cyp4v3_0010000
mmu-miR-7077-5p	mmu_Arfgef2_0010000
mmu-miR-7077-5p	mmu_Arfgef2_0011000
mmu-miR-7077-5p	mmu_Nsdhl_0005000
mmu-miR-7077-5p	mmu_Lrig1_0004000
mmu-miR-7077-5p	mmu_Zfp598_0002000
mmu-miR-7077-5p	mmu_Eef2k_0007000
mmu-miR-7077-5p	mmu_Snapc3_0020000
mmu-miR-7077-5p	mmu_Mtmr4_0010000
mmu-miR-7077-5p	mmu_Drc1_0003000
mmu-miR-7077-5p	mmu_Drc1_0004000
mmu-miR-7077-5p	mmu_Drc1_0005000
mmu-miR-7077-5p	mmu_4930593A02Rik_0038000
mmu-miR-7077-5p	mmu_4930593A02Rik_0054000
mmu-miR-7077-5p	mmu_Sergef_0016000
mmu-miR-7077-5p	mmu_Sergef_0023000
mmu-miR-7077-5p	mmu_Sergef_0025000
mmu-miR-7077-5p	mmu_Sergef_0024000
mmu-miR-7077-5p	mmu_Sergef_0022000
mmu-miR-7077-5p	mmu_Focad_0027000
mmu-miR-7077-5p	mmu_Focad_0015000
mmu-miR-7077-5p	mmu_Focad_0030000
mmu-miR-7077-5p	mmu_chr2_1517000
mmu-miR-7077-5p	mmu_Ahrr_0004000
mmu-miR-7077-5p	mmu_Wipf1_0002000
mmu-miR-7077-5p	mmu_Gpbp1l1_0016000
mmu-miR-7077-5p	mmu_Secisbp2_0010000
mmu-miR-7077-5p	mmu_Kat6a_0039000
mmu-miR-7077-5p	mmu_chr10_1893000
mmu-miR-7077-5p	mmu_Slc24a2_0015000
mmu-miR-7077-5p	mmu_Herc3_0003000
mmu-miR-7077-5p	mmu_Herc3_0002000
mmu-miR-7077-5p	mmu_Trrap_0003000
mmu-miR-7077-5p	mmu_chr1_2063000
mmu-miR-7077-5p	mmu_chr12_0786000
mmu-miR-7077-5p	mmu_Kdm3a_0026000
mmu-miR-7077-5p	mmu_Gm48448_0001000
mmu-miR-7077-5p	mmu_Rbm19_0004000
mmu-miR-7077-5p	mmu_Dnajc13_0044000
mmu-miR-7077-5p	mmu_Nrap_0026000
mmu-miR-7077-5p	mmu_Nrap_0025000
mmu-miR-7077-5p	mmu_Nrap_0023000
mmu-miR-7077-5p	mmu_Slc25a20_0002000
mmu-miR-7077-5p	mmu_Slc25a20_0001000
mmu-miR-7077-5p	mmu_Mllt10_0042000
mmu-miR-7077-5p	mmu_Mllt10_0110000
mmu-miR-7077-5p	mmu_Mllt10_0109000
mmu-miR-7077-5p	mmu_Zdhhc1_0002000
mmu-miR-7077-5p	mmu_Immp2l_0018000
mmu-miR-7077-5p	mmu_Immp2l_0021000
mmu-miR-7077-5p	mmu_Cmip_0013000
mmu-miR-7077-5p	mmu_Cmip_0018000
mmu-miR-7077-5p	mmu_Bach2it1_0002000
mmu-miR-7077-5p	mmu_Bach2it1_0003000
mmu-miR-7077-5p	mmu_Gm9733_0002000
mmu-miR-7077-5p	mmu_Arhgap17_0024000
mmu-miR-7077-5p	mmu_Sars_0008000
mmu-miR-7077-5p	mmu_Gm13479_0008000
mmu-miR-7077-5p	mmu_5330417C22Rik_0015000
mmu-miR-7077-5p	mmu_5330417C22Rik_0014000
mmu-miR-7077-5p	mmu_5330417C22Rik_0007000
mmu-miR-7077-5p	mmu_Trappc9_0025000
mmu-miR-7077-5p	mmu_Tmem116_0009000
mmu-miR-7077-5p	mmu_Bcl11b_0022000
mmu-miR-7077-5p	mmu_Anks3_0011000
mmu-miR-7077-5p	mmu_Anks3_0004000
mmu-miR-7077-5p	mmu_Ubr2_0020000
mmu-miR-7077-5p	mmu_Ubr2_0016000
mmu-miR-7077-5p	mmu_1700007F19Rik_0002000
mmu-miR-7077-5p	mmu_Ddhd1_0026000
mmu-miR-7077-5p	mmu_chr7_0950000
mmu-miR-7077-5p	mmu_Iqsec1_0017000
[truncated: 6,126 more rows]

## Sheet: raw date
Genes Up-Regulated In Neuro2a Htt25Q-ni Vs Htt72Q-ni Vs Htt72Q-i Transcriptional Signature 3 PMID28743452
Genes Up-Regulated In Neuro2a Htt25Q-ni Vs Htt72Q-ni Vs Htt72Q-i Transcriptional Signature 4 PMID28743452
Genes Up-Regulated In Expression In 10 Wk Frataxin KO Friedreich Ataxia Mice GSE31208
PC12 Htt-Q74 Vs PC12 Htt-Q23 Upon 96 H Of Induction PMID28499347
Up-regulated Genes In LPS TAT Or DAQ Activated Microglia PMID16384912
Genes Changed In Non-Induced PC12 Cells Vs Induced Q74 PC12 Cells Both Treated With Vehicle GSE119557
Genes Down-Regulated In Myotonic Dystrophy 1 Markers In Human Skeletal Muscle GSE48828
Genes Down-Regulated In Myotonic Dystrophy 2 Markers In Human Skeletal Muscle GSE48828
PC12 Htt-Q74 Vs PC12 Htt-Q23 Upon 72 H Of Induction PMID28499347
Genes Down-Regulated In Genes Changed In HDACi 4B Treated Vs Untreated Friedreich Ataxia Carrier Blood Cells GSE30933
Expression In 10 Wk Frataxin KO Friedreich Ataxia Mice GSE31208
Genes Changed In Microglia Of AD Model Mice PMID26001565
Genes Changed In Pons Of ATXN3-KI HET Mice GSE117605
Genes Changed In Pons Of ATXN3-KI HOM Mice GSE117605
Genes Changed In Pons Of YAC84Q Tg(hATXN3) Mice GSE117605
Genes Down-Regulated In Friedreich Ataxia iPSCs Expression Vs HES-2 Cell Line GSE22651
Genes Down-Regulated In Myotonic Dystrophy 1 Markers In Human Skeletal Muscle E-D-7014
Genes Down-Regulated In Myotonic Dystrophy 2 Markers In Human Skeletal Muscle E-D-7014
Genes Down-Regulated In Neuro2a Htt25Q-ni Vs Htt72Q-ni Vs Htt72Q-i Transcriptional Signature 4 PMID28743452
Genes Down-Regulated In Non-Induced PC12 Cells Vs Induced Q74 PC12 Cells Both Treated With Vehicle GSE119557
Genes Up-Regulated In Expression In The Heart Of Mice Inducibly Expressing Celf1 For 72 H GSE56185
Genes Up-Regulated In Influence Of Hsp90 Inhibitor On Expression In WT Mice GSE29681
Genes Up-Regulated In Neuro2a Htt25Q-ni Vs Htt72Q-ni Vs Htt72Q-i Transcriptional Signature 2 PMID28743452
Genes Up-Regulated In PC12 Htt-Q74 Vs PC12 Htt-Q23 Upon 72 H Of Induction PMID28499347
Genes Up-Regulated In PC12 Htt-Q74 Vs PC12 Htt-Q23 Upon 96 H Of Induction PMID28499347
Genes Up-Regulated In Meclizine Treated STHdhQ111 Vs Control GSE129143
Myotonic Dystrophy 1 Markers In Human Skeletal Muscle GSE48828
Myotonic Dystrophy 2 Markers In Human Skeletal Muscle GSE48828
Genes Up-Regulated In Endothelial Cells Of HD Patients Vs Control PMID32681824
FOXP1 Up-Regulated Genes In Human Neural Cells GSE62718
Genes Down-Regulated In Expression In H9 Line NSCs Vs ESCs GSE34201
Genes Up-Regulated In Friedreich Ataxia iPSCs Expression Vs IMR90 Cell Line GSE22651
Genes Up-Regulated In Human Granule Cells Vs Basket Cells GSE101912
PLC Pericyte Lineage Cell-Enriched Genes PMID30078729
Genes Changed In Cyproheptadine Treated STHdhQ111 Vs Control GSE129143
Cortex RNA M22 Module (Darkgreen) PMID26900923
Genes Changed In HDACi 4B Treated Vs Untreated Friedreich Ataxia Carrier Blood Cells GSE30933
Genes Down-Regulated In Non-myotonic Dystrophy Markers In Human Skeletal Muscle GSE48828
Genes Up-Regulated In Cyproheptadine Treated STHdhQ111 Vs Control GSE129143
Liver RNA M38 Module (Plum1) PMID26900923
Locuses With Increased DNA Methylation In Caudate Nucleus Of HD Vs Control GSE72778
Changes In DNA Methylation In Caudate Nucleus Of HD Vs Control GSE72778
PC12 Htt-Q74 Vs PC12 Htt-Q23 Upon 120 H Of Induction PMID28499347
Friedreich Ataxia iPSCs Expression Vs BG03 Cell Line GSE22651
Genes Down-Regulated In Microglia Vs Monocytes PMID28671693
PC12 Htt-Q74 Vs PC12 Htt-Q23 Overall PMID28499347
Mouse Cortex Corticospinal Neuron Markers PMID19013282
Genes Down-Regulated In Control Vs Mitomycin Treated NSCs GSE24116
Genes Changed In Endothelial Cells Of HD Patients Vs Control PMID32681824
Genes Down-Regulated In Friedreich Ataxia iPSCs Expression Vs BG03 Cell Line GSE22651
Genes Down-Regulated In Genes Changed In HDACi 9B Treated Vs Untreated Friedreich Ataxia Carrier Blood Cells GSE30933
Genes Down-Regulated In Neuro2a Htt25Q-ni Vs Htt72Q-ni Vs Htt72Q-i Transcriptional Signature 2 PMID28743452
PC12 Htt-Q74 Vs PC12 Htt-Q23 Upon 48 H Of Induction PMID28499347
Locuses With Decreased DNA Methylation In Caudate Nucleus Of HD Vs Control GSE72778
Expression In The Heart Of Mice Inducibly Expressing Celf1 For 72 H GSE56185
FOXP1 Regulated Genes In Human Neural Cells GSE62718
Genes Down-Regulated In Friedreich Ataxia iPSCs Expression Vs Mel1 P51 Cell Line GSE22651
Genes Down-Regulated In Genes Changed In HDACi 106 Treated Vs Untreated Friedreich Ataxia Carrier Blood Cells GSE30933
Genes Up-Regulated In HD Fibroblasts Treated With ZFP-C Vs Control GSE127820
Genes Up-Regulated In Neuro2a Htt72Q-ni Vs Htt25Q-ni PMID28743452
Genes Up-Regulated In Brain And Spinal Cord Derived OPCs From P7 Vs E13.5 Mice PMID30078729
Genes Up-Regulated In Diacylglycerol Kinase Inhibitor II Treated STHdhQ111 Vs Control GSE129143
Genes Up-Regulated In Microglia Of AD Model Mice PMID26001565
HD-specific Set Of Genes (Cluster 1) PMID28499347
Microglia Genes Up-Regulated After Activation PMID15579277
Neuron Gene Markers PMID17151600
STHdhQ7/Q7 Vs STHdhQ111/Q111 Cells In Normal Conditions GSE38001
NP1a Neural Progenitor Cell-Enriched Genes PMID30078729
Constitutive And Activity-Dependent Synaptic AMPA Receptor Delivery In HD CHDI114
Genes Up-Regulated In Neuro2a Htt72Q (72Q-ni+72Q-i) Vs Htt25Q (25Q-ni) PMID28743452
OPC1cyc Oligodendrocyte Precursor Cell-Enriched Genes PMID30078729
Top Astrocyte-Expressed Genes In Humans And Mice PMID29892006
Top Neuron-Expressed Genes In Humans And Mice PMID29892006
COP Committed Oligodendrocyte Precursor Cell-Enriched Genes PMID30078729
ChIP-seq For H3K27ac In R6/1 Vs WT Down GSE140117
Genes Changed In Meclizine Treated STHdhQ111 Vs Control GSE129143
Genes Up-Regulated In Mouse Spinal Cord Derived OPCs From P7 Vs E13.5 Mice PMID30078729
Top Endothelial Cell-Expressed Genes In Humans And Mice PMID29892006
Top Microglia-Enriched Genes In Humans And Mice PMID29892006
Top Microglia-Specific Genes In Humans And Mice PMID29892006
Genes Changed In HDACi 9B Treated Vs Untreated Friedreich Ataxia Carrier Blood Cells GSE30933
OPC1b Oligodendrocyte Precursor Cell-Enriched Genes PMID30078729
NP3 Neural Progenitor Cell-Enriched Genes PMID30078729
Genes Enriched In Microglia Vs Astrocytes Or Oligodendrocytes PMID23954174
Influence Of Hsp90 Inhibitor On Expression In WT Mice GSE29681
Down-regulated Genes In Pons Of ATXN3 KO Mice GSE117605
Genes Changed In Human Granule Cells Vs Basket Cells GSE101912
Genes Up-Regulated In Expression In VUB01 Vs VUB03 MPCs GSE7177
Liver RNA M1 Module (Turquoise) PMID26900923
Genes Up-Regulated In Expression In Striatal Cells Of HdhQ111 HD Mice GSE3583
Genes Up-Regulated In STHdhQ7/Q7 Vs STHdhQ111/Q111 Cells In Normal Conditions GSE38001
Non-Myotonic Dystrophy Markers In Human Skeletal Muscle GSE48828
Expression In Mbnl1/2 KO MEFs Treated With Control siRNA Vs Untreated WT MEFs GSE60487
Genes Up-Regulated In Expression In Mbnl1/2 KO MEFs Treated With Control siRNA Vs Untreated WT MEFs GSE60487
Down-regulated Genes In Pons Of ATXN3-KI HET Mice GSE117605
Down-regulated Genes In Pons Of ATXN3-KI HOM Mice GSE117605
Down-regulated Genes In Pons Of ATXN3-dupKI HET Mice GSE117605
Down-regulated Genes In Pons Of YAC15Q Tg(hATXN3) Mice GSE117605
Down-regulated Genes In Pons Of YAC84Q Tg(hATXN3) Mice GSE117605
Expression In VUB01 Vs VUB03 MPCs GSE7177
Expression In Quadriceps Muscle Of 16 Wk Mbnl1 KO Myotonic Dystrophy Mice GSE39911
Genes Changed In Microglia Of ALS Model Mice PMID26001565
Genes Changed In Microglia Vs Monocytes PMID28671693
Genes Changed In Pons Of ATXN3 KO Mice GSE117605
Genes Changed In Pons Of ATXN3-dupKI HET Mice GSE117605
Genes Down-Regulated In Expression In 1 D WT Mice Vs 4 Wk HSALR Myotonic Dystrophy Mice GSE60487
Genes Down-Regulated In Expression In SI-187 Line NSCs Vs ESCs GSE34201
Genes Down-Regulated In Expression In VUB01 Line NSCs Vs ESCs GSE34201
Genes Down-Regulated In Expression In VUB05 Line NSCs Vs ESCs GSE34201
Genes Down-Regulated In Genes Changed In Vehicle Treated Vs Untreated Friedreich Ataxia Patient Blood Cells GSE30933
Genes Down-Regulated In HD Neurons Treated With ZFP-A Vs Control GSE127821
Genes Down-Regulated In PC12 Htt-Q74 Vs PC12 Htt-Q23 Upon 96 H Of Induction PMID28499347
Genes Down-Regulated In Vehicle Treated PBMCs From Friedreich Ataxia Patients Vs Controls GSE30933
Genes Up-Regulated In Expression In NSCs Lines HD180i.5 And HD60i.4 From HD Patients GSE37517
Genes Up-Regulated In Friedreich Ataxia iPSCs Expression Vs HDF Cell Line GSE22651
Genes Up-Regulated In HD Markers In Human Caudate Nucleus (HG-U133A) E-AFMX-6
Genes Up-Regulated In Neuro2a Htt25Q-ni Vs Htt72Q-ni Vs Htt72Q-i Transcriptional Signature 1 PMID28743452
Genes Up-Regulated In Neuro2a Htt72Q-i Vs Htt25Q-ni PMID28743452
Genes Up-Regulated In Microglia Of ALS Model Mice PMID26001565
Genes Up-Regulated Upon ZFP mHtt Repressor Treatment In R6/2 Astrocytes PMID31619545
HDACi-106 Treated PBMCs From Friedreich Ataxia Carriers Vs Controls GSE30933
Myotonic Dystrophy 1 Up-Regulated Genes In Human Skeletal Muscle GSE86356
OPC1a Oligodendrocyte Precursor Cell-Enriched Genes PMID30078729
Striatum RNA M23 Module (Darkturquoise) PMID26900923
The Global Proteome Data Of The Soluble Fraction From The Brains Of Q175 And WT Mice PMID31138642
EVLMC Embryonic Vascular And Leptomeningeal Cell-Enriched Genes PMID30078729
PnVLMC Post-Natal Vascular And Leptomeningeal Cell-Enriched Genes PMID30078729
Genes Changed In iSPNs Of zQ175DN Vs HdhQ20 PMID32681824
Genes Changed In Pons Of YAC15Q Tg(hATXN3) Mice GSE117605
Up-regulated Genes In Pons Of ATXN3-KI HET Mice GSE117605
Friedreich Ataxia iPSCs Expression Vs MR90C2P27 Cell Line GSE22651
Ubiquitinated Soluble Proteins In The Brains Of Q175 Mice PMID31138642
Up-regulated Genes In Pons Of YAC84Q Tg(hATXN3) Mice GSE117605
Htt Up-Regulated Genes In Mouse MEFs GSE11139
Hdac4 Interactome In Whole Brain Of Q20 And Q140 HD Mice PMID31040226
Genes Down-Regulated In Expression In SA01 Line NSCs Vs ESCs GSE34201
The Global Ubiquitinome Data Of The Insoluble Fraction From The Brains Of Q175 And WT Mice PMID31138642
Striatum RNA M1 Module (Turquoise) PMID26900923
Up-regulated Genes In Pons Of ATXN3-KI HOM Mice GSE117605
Genes Down-Regulated In Friedreich Ataxia iPSCs Expression Vs ES4CL2 Cell Line GSE22651
Caudal Serotonergic Neuron-Enriched Genes PMID20071532
Expression In Skeletal Muscle Of HSALR 20B Myotonic Dystrophy Mice GSE24920
Genes Down-Regulated In HD Markers In Mouse STHdh Cells GSE11358
Genes Down-Regulated In iSPNs Of zQ175DN Vs HdhQ20 PMID32681824
LGN Interneuron Gene Module PMID19638972
NFOL Newly Formed Oligodendrocyte-Enriched Genes PMID30078729
Genes Up-Regulated In Friedreich Ataxia iPSCs Expression Vs SC30 Cell Line GSE22651
Genes Changed In HDACi 106 Vs Vehicle Treated Friedreich Ataxia Patient Blood Cells GSE30933
Genes Down-Regulated In Expression In SIVF017 Line NSCs Vs ESCs GSE34201
Genes Up-Regulated In Expression In Cerebrum Of 22 Wk R6/1 HD Mice GSE3621
Genes Up-Regulated In Friedreich Ataxia iPSCs Expression Vs Pel Stem Cell Line GSE22651
DOID:898 autosomal dominant polycystic kidney disease
DOID:1612 breast cancer
DOID:684 hepatocellular carcinoma
DOID:9008138 Ductal Carcinoma
DOID:0080322 polycystic kidney disease
DOID:9001285 Alcoholic Liver Diseases
DOID:8923 skin melanoma
DOID:2154 nephroblastoma
DOID:9006223 Kidney Reperfusion Injury
DOID:3021 acute kidney failure
DOID:9002928 Colonic Neoplasms
DOID:9003936 Cardiomegaly
DOID:6432 pulmonary hypertension
DOID:305 carcinoma
DOID:0080718 GNE myopathy
DOID:3068 glioblastoma
DOID:9007608 Neoplastic Cell Transformation
DOID:9000918 Disease Progression
DOID:9001041 Asphyxia
DOID:3672 rhabdoid cancer
DOID:3965 Merkel cell carcinoma
DOID:5688 Werner syndrome
DOID:8717 decubitus ulcer
DOID:9005600 Infarction
DOID:8691 mycosis fungoides
DOID:4450 renal cell carcinoma
DOID:9000039 Spinal Cord Injuries
DOID:1793 pancreatic cancer
DOID:9005233 Mammary Neoplasms Experimental
DOID:1781 thyroid gland cancer
DOID:9000111 Radiation Injuries
DOID:12337 varicocele
DOID:12510 retinal ischemia
DOID:13543 hyperparathyroidism
DOID:14268 sclerosing cholangitis
DOID:9005100 Aberrant Crypt Foci
DOID:5394 prolactinoma
DOID:9005175 Ulcer
DOID:9003646 Arterial Thrombosis
DOID:0060213 frontotemporal dementia and/or amyotrophic lateral sclerosis-1
DOID:9000585 Intervertebral Disc Disease
DOID:9006281 Temporomandibular Joint Disorders
DOID:9003049 Femur Head Necrosis
DOID:3908 lung non-small cell carcinoma
DOID:0050852 Limb Ischemia
DOID:9008013 Sporadic Papillary Renal Cell Carcinoma
DOID:9001390 Testis Reperfusion Injury
DOID:9004203 Chromosome Breakage
DOID:9923 developmental coordination disorder
DOID:13948 bladder neck obstruction
DOID:5408 Paget's disease of bone
DOID:0080733 Ehlers-Danlos syndrome dermatosparaxis type
DOID:9007970 Chronic Cerebral Hypoperfusion
DOID:9007748 Retinal Neovascularization
DOID:9004240 Phyllodes Tumor
DOID:9004643 Urologic Neoplasms
DOID:10964 cholesteatoma of middle ear
DOID:9006827 Lung Reperfusion Injury
DOID:0001816 angiosarcoma
DOID:10763 hypertension
DOID:1107 esophageal carcinoma
DOID:9004713 Acute-Phase Reaction
DOID:4247 coronary restenosis
DOID:1040 chronic lymphocytic leukemia
DOID:8584 Burkitt lymphoma
DOID:9002661 Diabetes Complications
DOID:13413 hepatic encephalopathy
DOID:9002909 Oxygen-Induced Retinopathy
DOID:9004914 Postmenopausal Osteoporosis
DOID:9006676 Micronuclei Chromosome-Defective
DOID:9005643 Experimental Diabetes Mellitus
DOID:9000855 Radiation Injuries Experimental
DOID:11981 morbid obesity
DOID:9008939 Breast Neoplasms
DOID:8567 Hodgkin's lymphoma
DOID:0110861 autosomal recessive polycystic kidney disease
DOID:11132 prostatic hypertrophy
DOID:3213 demyelinating disease
DOID:9001403 Bronchopulmonary Dysplasia
DOID:10283 prostate cancer
DOID:9002304 Prostatic Neoplasms
DOID:9006647 Experimental Autoimmune Neuritis
DOID:4905 pancreatic carcinoma
DOID:4467 clear cell renal cell carcinoma
DOID:0080630 B-lymphoblastic leukemia/lymphoma
DOID:9296 cleft lip
DOID:127 leiomyoma
DOID:0050855 renal fibrosis
DOID:0060060 non-Hodgkin lymphoma
DOID:9002221 Hyperplasia
DOID:1074 kidney failure
DOID:3069 malignant astrocytoma
DOID:0060074 ductal carcinoma in situ
DOID:8634 prostate carcinoma in situ
DOID:9001708 Hemorrhagic Shock
DOID:9006182 Carotid Artery Injuries
DOID:9008691 Liver Injury
DOID:9002910 Hearing Loss Noise-Induced
DOID:2526 prostate adenocarcinoma
DOID:9004547 Thyroid Neoplasms
DOID:0050745 diffuse large B-cell lymphoma
DOID:14743 trichorhinophalangeal syndrome type I
DOID:684 hepatocellular carcinoma
DOID:9008023 Memory Disorders
DOID:1686 glaucoma
DOID:0060318 acute promyelocytic leukemia
DOID:1883 hepatitis C
DOID:3008 invasive ductal carcinoma
DOID:898 autosomal dominant polycystic kidney disease
DOID:9004464 Skin Neoplasms
DOID:3347 osteosarcoma
DOID:9007730 Burns
DOID:9002676 Cerebral Hemorrhage
DOID:0050902 medulloblastoma
DOID:0050156 idiopathic pulmonary fibrosis
DOID:9000438 Subarachnoid Hemorrhage
DOID:3969 thyroid gland papillary carcinoma
DOID:674 cleft palate
DOID:0080600 COVID-19
DOID:9002170 Experimental Neoplasms
DOID:9000117 Esophageal Neoplasms
DOID:5409 lung small cell carcinoma
DOID:769 neuroblastoma
DOID:0050908 myelodysplastic syndrome
DOID:2746 glycogen storage disease V
DOID:9003676 Hypoxia-Ischemia Brain
DOID:9003373 Uterine Cervical Neoplasms
DOID:9004283 Transplant Rejection
DOID:4448 macular degeneration
DOID:1682 congenital heart disease
DOID:12236 primary biliary cholangitis
DOID:14566 disease of cellular proliferation
DOID:9007715 Endometrial Neoplasms
DOID:8893 psoriasis
DOID:850 lung disease
DOID:8947 diabetic retinopathy
DOID:5426 primary ovarian insufficiency
DOID:299 adenocarcinoma
DOID:9952 acute lymphoblastic leukemia
DOID:11476 osteoporosis
DOID:2394 ovarian cancer
DOID:9004616 Left Ventricular Hypertrophy
DOID:1324 lung cancer
DOID:9007188 Liver Neoplasms
DOID:1749 squamous cell carcinoma
DOID:9001586 Experimental Liver Neoplasms
DOID:3525 middle cerebral artery infarction
DOID:9452 fatty liver disease
DOID:8398 osteoarthritis
DOID:332 amyotrophic lateral sclerosis
DOID:3748 esophagus squamous cell carcinoma
DOID:0060224 atrial fibrillation
DOID:11984 hypertrophic cardiomyopathy
DOID:9006205 Animal Disease Models
DOID:9004575 Neoplasm Invasiveness
DOID:2316 brain ischemia
DOID:9002211 Hyperalgesia
DOID:9002762 Ovarian Neoplasms
DOID:224 transient cerebral ischemia
DOID:9002457 Experimental Arthritis
DOID:9007102 Myocardial Ischemia
DOID:9119 acute myeloid leukemia
DOID:5082 liver cirrhosis
DOID:7148 rheumatoid arthritis
DOID:9007838 Myocardial Reperfusion Injury
DOID:9002165 Diabetic Nephropathies
DOID:11054 urinary bladder cancer
DOID:3910 lung adenocarcinoma
DOID:9000217 Stomach Neoplasms
DOID:9005172 Lung Neoplasms
DOID:6000 congestive heart failure
DOID:9004009 Reperfusion Injury
DOID:2841 asthma
DOID:9008443 Colorectal Neoplasms
DOID:5844 myocardial infarction
DOID:1612 breast cancer
DOID:9000965 Neoplasm Metastasis
DOID:10652 Alzheimer's disease
DOID:9970 obesity
DOID:9352 type 2 diabetes mellitus
DOID:9256 colorectal cancer
DOID:9001573 Experimental Liver Cirrhosis
