# Supplementary material for: Identification of autophagy-related genes in intestinal ischemia-reperfusion injury and their role in immune infiltration
Source: Front Physiol. 2025 May 26;16:1601968. doi: 10.3389/fphys.2025.1601968 (PMC12146356; doi:10.3389/fphys.2025.1601968)
Supplement: Supplementary file 11 [file Table9.xls]

## Sheet: drugs prediction
Enrichment FDR	nGenes	Pathway Genes	Fold Enrichment	Pathway	URL	Genes
0.000432883356206337	4	482	36.4647302904564	Hydrogen Peroxide	HTTP://CTDBASE.ORG/	Gabarapl1 Hif1a Myc Sqstm1
0.000781587212828478	4	665	26.4300751879699	Rotenone	HTTP://CTDBASE.ORG/	Gabarapl1 Hif1a Myc Sqstm1
0.0011647145930471	4	875	20.0868571428571	Isoproterenol	HTTP://CTDBASE.ORG/	Gabarapl1 Hif1a Myc Sqstm1
0.0011647145930471	2	22	399.454545454545	Trigonelline	HTTP://CTDBASE.ORG/	Myc Sqstm1
0.00208822701644336	3	329	40.0668693009119	Arsenic Trioxide	HTTP://CTDBASE.ORG/	Hif1a Myc Sqstm1
0.00208822701644336	2	39	225.333333333333	Niacinamide	HTTP://CTDBASE.ORG/	Myc Sqstm1
0.00253123244027997	2	48	183.083333333333	O(2)-vinyl-1-(pyrrolidin-1-yl)diazen-1-ium-1,2-diolate	HTTP://CTDBASE.ORG/	Myc Sqstm1
0.00253123244027997	2	51	172.313725490196	Saponins	HTTP://CTDBASE.ORG/	Hif1a Myc
0.00271638991027668	2	56	156.928571428571	Taurocholic Acid	HTTP://CTDBASE.ORG/	Myc Sqstm1
0.0032992930831792	2	65	135.2	Dactinomycin	HTTP://CTDBASE.ORG/	Myc Sqstm1
0.00422361458238129	3	515	25.5961165048544	Glucose	HTTP://CTDBASE.ORG/	Hif1a Myc Sqstm1
0.00422361458238129	3	526	25.0608365019011	Nicotine	HTTP://CTDBASE.ORG/	Hif1a Myc Sqstm1
0.00424608895362916	2	84	104.619047619048	Lead nitrate	HTTP://CTDBASE.ORG/	Myc Sqstm1
0.0044271233619441	2	89	98.7415730337079	Lithium Chloride	HTTP://CTDBASE.ORG/	Myc Sqstm1
0.00451230052135649	2	93	94.494623655914	Cycloheximide	HTTP://CTDBASE.ORG/	Hif1a Myc
0.00489166079829506	2	100	87.88	Methylformamide	HTTP://CTDBASE.ORG/	Gabarapl1 Sqstm1
0.00544748050625744	2	115	76.4173913043478	2-(2-amino-3-methoxyphenyl)-4H-1-benzopyran-4-one	HTTP://CTDBASE.ORG/	Hif1a Myc
0.00544748050625744	3	664	19.8524096385542	Cadmium	HTTP://CTDBASE.ORG/	Hif1a Myc Sqstm1
0.00544748050625744	2	110	79.8909090909091	Fulvestrant	HTTP://CTDBASE.ORG/	Hif1a Myc
0.00591921855716321	2	123	71.4471544715447	Epigallocatechin gallate	HTTP://CTDBASE.ORG/	Myc Sqstm1
0.00649080380832356	2	132	66.5757575757576	Vitamin K 3	HTTP://CTDBASE.ORG/	Hif1a Sqstm1
0.0077838469335492	2	148	59.3783783783784	Flusilazole	HTTP://CTDBASE.ORG/	Hif1a Myc
0.00785184870687435	2	152	57.8157894736842	2-(4-morpholinyl)-8-phenyl-4H-1-benzopyran-4-one	HTTP://CTDBASE.ORG/	Hif1a Sqstm1
0.0079639571402218	1	3	1464.66666666667	5-(4-ethylbenzylidene)-2-thioxothiazolidin-4-one	HTTP://CTDBASE.ORG/	Myc
0.0079639571402218	1	3	1464.66666666667	Acarbose	HTTP://CTDBASE.ORG/	Sqstm1
0.0079639571402218	1	3	1464.66666666667	Chlorodibromomethane	HTTP://CTDBASE.ORG/	Myc
0.0079639571402218	2	178	49.3707865168539	Drugs Chinese Herbal	HTTP://CTDBASE.ORG/	Hif1a Myc
0.0079639571402218	1	3	1464.66666666667	Ginsenoside Rg2	HTTP://CTDBASE.ORG/	Sqstm1
0.0079639571402218	1	3	1464.66666666667	Metarrestin	HTTP://CTDBASE.ORG/	Sqstm1
0.0079639571402218	1	3	1464.66666666667	ML-SA1 compound	HTTP://CTDBASE.ORG/	Sqstm1
0.0079639571402218	3	830	15.8819277108434	Perfluorooctanoic acid	HTTP://CTDBASE.ORG/	Gabarapl1 Myc Sqstm1
0.0079639571402218	2	168	52.3095238095238	Sirolimus	HTTP://CTDBASE.ORG/	Gabarapl1 Sqstm1
0.0079639571402218	1	3	1464.66666666667	STA 9090	HTTP://CTDBASE.ORG/	Myc
0.00875955533475867	1	4	1098.5	9-(6-aminopyridin-3-yl)-1-(3-(trifluoromethyl)phenyl)benzo(h)(1,6)naphthyridin-2(1H)-one	HTTP://CTDBASE.ORG/	Sqstm1
0.00875955533475867	1	4	1098.5	Bafilomycin A	HTTP://CTDBASE.ORG/	Sqstm1
0.00875955533475867	1	4	1098.5	Beta-thujaplicin	HTTP://CTDBASE.ORG/	Sqstm1
0.00875955533475867	3	995	13.2482412060301	Doxorubicin	HTTP://CTDBASE.ORG/	Hif1a Myc Sqstm1
0.00875955533475867	1	4	1098.5	N-carbamylglutamate	HTTP://CTDBASE.ORG/	Sqstm1
0.00875955533475867	3	974	13.5338809034908	Paraquat	HTTP://CTDBASE.ORG/	Gabarapl1 Myc Sqstm1
0.00875955533475867	1	4	1098.5	Zeaxanthins	HTTP://CTDBASE.ORG/	Hif1a
0.00921890580381207	1	6	732.333333333333	1,10-phenanthroline	HTTP://CTDBASE.ORG/	Hif1a
0.00921890580381207	1	6	732.333333333333	1-(5-chloro-6-(trifluoromethoxy)-1H-benzoimidazol-2-yl)-1H-pyrazole-4-carboxylic acid	HTTP://CTDBASE.ORG/	Hif1a
0.00921890580381207	1	6	732.333333333333	2-Methoxyestradiol	HTTP://CTDBASE.ORG/	Hif1a
0.00921890580381207	1	5	878.8	3,4-dihydroxybenzoate	HTTP://CTDBASE.ORG/	Hif1a
0.00921890580381207	1	6	732.333333333333	4-benzyl-2-methyl-1,2,4-thiadiazolidine-3,5-dione	HTTP://CTDBASE.ORG/	Myc
0.00921890580381207	1	6	732.333333333333	4-methylumbelliferone 8-carbaldehyde	HTTP://CTDBASE.ORG/	Sqstm1
0.00921890580381207	2	234	37.5555555555556	Acetylcysteine	HTTP://CTDBASE.ORG/	Hif1a Sqstm1
0.00921890580381207	1	5	878.8	Beryllium fluoride	HTTP://CTDBASE.ORG/	Myc
0.00921890580381207	2	224	39.2321428571429	Bleomycin	HTTP://CTDBASE.ORG/	Hif1a Myc
0.00921890580381207	3	1084	12.1605166051661	Cisplatin	HTTP://CTDBASE.ORG/	Gabarapl1 Hif1a Sqstm1
0.00921890580381207	1	6	732.333333333333	Clioquinol	HTTP://CTDBASE.ORG/	Hif1a
0.00921890580381207	2	250	35.152	Fenofibrate	HTTP://CTDBASE.ORG/	Hif1a Myc
0.00921890580381207	1	6	732.333333333333	Lactulose	HTTP://CTDBASE.ORG/	Sqstm1
0.00921890580381207	1	6	732.333333333333	Manganese tetrakis-(N-ethyl-2 pyridyl) porphyrin	HTTP://CTDBASE.ORG/	Myc
0.00921890580381207	1	6	732.333333333333	Melibiose	HTTP://CTDBASE.ORG/	Sqstm1
0.00921890580381207	2	238	36.9243697478992	Nickel	HTTP://CTDBASE.ORG/	Hif1a Myc
0.00921890580381207	1	6	732.333333333333	Pyrithione zinc	HTTP://CTDBASE.ORG/	Sqstm1
0.00985482431953228	1	8	549.25	3-(5'-hydroxymethyl-2'-furyl)-1-benzylindazole	HTTP://CTDBASE.ORG/	Hif1a
0.00985482431953228	1	7	627.714285714286	4,6-dimorpholino-N-(4-nitrophenyl)-1,3,5-triazin-2-amine	HTTP://CTDBASE.ORG/	Sqstm1
0.00985482431953228	2	301	29.1960132890365	Benzene	HTTP://CTDBASE.ORG/	Gabarapl1 Myc
0.00985482431953228	1	8	549.25	Bromopyruvate	HTTP://CTDBASE.ORG/	Hif1a
0.00985482431953228	3	1293	10.1948955916473	Cadmium Chloride	HTTP://CTDBASE.ORG/	Hif1a Myc Sqstm1
0.00985482431953228	2	305	28.8131147540984	Curcumin	HTTP://CTDBASE.ORG/	Hif1a Myc
0.00985482431953228	2	296	29.6891891891892	Cyanoginosin LR	HTTP://CTDBASE.ORG/	Myc Sqstm1
0.00985482431953228	1	8	549.25	Dibromoacetic acid	HTTP://CTDBASE.ORG/	Myc
0.00985482431953228	1	7	627.714285714286	Leucine	HTTP://CTDBASE.ORG/	Sqstm1
0.00985482431953228	1	8	549.25	Limonene	HTTP://CTDBASE.ORG/	Myc
0.00985482431953228	1	8	549.25	N-Acetylcysteinamide	HTTP://CTDBASE.ORG/	Hif1a
0.00985482431953228	1	7	627.714285714286	Norisoboldine	HTTP://CTDBASE.ORG/	Hif1a
0.00985482431953228	2	281	31.2740213523132	N-(oxo-5,6-dihydrophenanthridin-2-yl)-N,N-dimethylacetamide hydrochloride	HTTP://CTDBASE.ORG/	Myc Sqstm1
0.00985482431953228	1	7	627.714285714286	SC-66 compound	HTTP://CTDBASE.ORG/	Sqstm1
0.00985482431953228	1	8	549.25	Temsirolimus	HTTP://CTDBASE.ORG/	Sqstm1
0.00985482431953228	1	8	549.25	Toxaphene	HTTP://CTDBASE.ORG/	Myc
0.0106486647888726	1	9	488.222222222222	3-(2,4-dichloro-5-methoxyphenyl)-2-sulfanyl-4(3H)-quinazolinone	HTTP://CTDBASE.ORG/	Sqstm1
0.0114635383384744	1	11	399.454545454545	1,25-dihydroxyvitamin D	HTTP://CTDBASE.ORG/	Myc
0.0114635383384744	1	11	399.454545454545	Alpinetin	HTTP://CTDBASE.ORG/	Sqstm1
0.0114635383384744	3	1410	9.34893617021276	Cyclosporine	HTTP://CTDBASE.ORG/	Hif1a Myc Sqstm1
0.0114635383384744	1	11	399.454545454545	Dihydromyricetin	HTTP://CTDBASE.ORG/	Sqstm1
0.0114635383384744	1	11	399.454545454545	GW 7647	HTTP://CTDBASE.ORG/	Myc
0.0114635383384744	1	11	399.454545454545	Oils Volatile	HTTP://CTDBASE.ORG/	Sqstm1
0.0114635383384744	1	11	399.454545454545	PP242	HTTP://CTDBASE.ORG/	Sqstm1
0.0114635383384744	1	11	399.454545454545	Radon	HTTP://CTDBASE.ORG/	Sqstm1
0.0114635383384744	1	10	439.4	STO 609	HTTP://CTDBASE.ORG/	Sqstm1
0.0114635383384744	1	10	439.4	Triethylene glycol dimethacrylate	HTTP://CTDBASE.ORG/	Sqstm1
0.0115426520340163	1	12	366.166666666667	3-((6-(2-methoxyphenyl)pyrimidin-4-yl)amino)phenyl)methane sulfonamide	HTTP://CTDBASE.ORG/	Myc
0.0115426520340163	2	358	24.5474860335196	9,10-Dimethyl-1,2-benzanthracene	HTTP://CTDBASE.ORG/	Hif1a Myc
0.0115426520340163	1	12	366.166666666667	Carbon Disulfide	HTTP://CTDBASE.ORG/	Sqstm1
0.0115426520340163	2	369	23.8157181571816	Decitabine	HTTP://CTDBASE.ORG/	Gabarapl1 Myc
0.0115426520340163	1	12	366.166666666667	Epalrestat	HTTP://CTDBASE.ORG/	Hif1a
0.0115426520340163	1	12	366.166666666667	Ginsenoside Rg3	HTTP://CTDBASE.ORG/	Sqstm1
0.0115426520340163	3	1455	9.05979381443299	Resveratrol	HTTP://CTDBASE.ORG/	Hif1a Myc Sqstm1
0.0115586960243167	1	14	313.857142857143	5,7-dihydroxy-6-methoxy-2-phenylchromen-4-one	HTTP://CTDBASE.ORG/	Hif1a
0.0115586960243167	1	13	338	Alachlor	HTTP://CTDBASE.ORG/	Myc
0.0115586960243167	1	13	338	Androstanols	HTTP://CTDBASE.ORG/	Myc
0.0115586960243167	1	14	313.857142857143	Anticholesteremic Agents	HTTP://CTDBASE.ORG/	Sqstm1
0.0115586960243167	1	14	313.857142857143	AZD 6244	HTTP://CTDBASE.ORG/	Myc
0.0115586960243167	2	380	23.1263157894737	Benzyloxycarbonylleucyl-leucyl-leucine aldehyde	HTTP://CTDBASE.ORG/	Hif1a Myc
0.0115586960243167	1	13	338	Butylhydroxybutylnitrosamine	HTTP://CTDBASE.ORG/	Myc
0.0115586960243167	1	14	313.857142857143	Cytarabine	HTTP://CTDBASE.ORG/	Hif1a
0.0115586960243167	3	1540	8.55974025974026	Dextran Sulfate	HTTP://CTDBASE.ORG/	Hif1a Myc Sqstm1
0.0115586960243167	1	13	338	Dibutyldichlorotin	HTTP://CTDBASE.ORG/	Myc
0.0115586960243167	1	14	313.857142857143	Lupeol	HTTP://CTDBASE.ORG/	Myc
0.0115586960243167	1	13	338	Phenylhydrazine	HTTP://CTDBASE.ORG/	Myc
0.0115586960243167	1	14	313.857142857143	Pirfenidone	HTTP://CTDBASE.ORG/	Hif1a
0.0115586960243167	1	14	313.857142857143	Thiamine	HTTP://CTDBASE.ORG/	Sqstm1
0.0115586960243167	1	14	313.857142857143	Trichloroacetic Acid	HTTP://CTDBASE.ORG/	Myc
0.0116160894845025	1	15	292.933333333333	Bicyclol	HTTP://CTDBASE.ORG/	Myc
0.0116160894845025	4	3666	4.79432624113475	Hexabromocyclododecane	HTTP://CTDBASE.ORG/	Gabarapl1 Hif1a Myc Sqstm1
0.0116160894845025	1	15	292.933333333333	HU 308	HTTP://CTDBASE.ORG/	Sqstm1
0.0116160894845025	2	407	21.5921375921376	Lipopolysaccharide E coli O55-B5	HTTP://CTDBASE.ORG/	Hif1a Sqstm1
0.0116160894845025	1	15	292.933333333333	NG-Nitroarginine Methyl Ester	HTTP://CTDBASE.ORG/	Myc
0.0116160894845025	1	15	292.933333333333	Salvianolic acid B	HTTP://CTDBASE.ORG/	Myc
0.0116160894845025	1	15	292.933333333333	Tetraarsenic tetrasulfide	HTTP://CTDBASE.ORG/	Myc
0.0121739001922466	1	16	274.625	Epicatechin gallate	HTTP://CTDBASE.ORG/	Myc
0.0121739001922466	1	16	274.625	Indirubin	HTTP://CTDBASE.ORG/	Myc
0.0121978225038665	2	430	20.4372093023256	Tunicamycin	HTTP://CTDBASE.ORG/	Hif1a Sqstm1
0.01271250437463	1	17	258.470588235294	Arsenic trichloride	HTTP://CTDBASE.ORG/	Myc
0.0129956872526549	2	448	19.6160714285714	Tetradecanoylphorbol Acetate	HTTP://CTDBASE.ORG/	Hif1a Myc
0.0130141453148331	1	18	244.111111111111	Bromodichloromethane	HTTP://CTDBASE.ORG/	Myc
0.0130141453148331	1	18	244.111111111111	GANT 61	HTTP://CTDBASE.ORG/	Myc
0.0130141453148331	1	18	244.111111111111	O-Aminoazotoluene	HTTP://CTDBASE.ORG/	Myc
0.0132963539045858	1	19	231.263157894737	Anemoside B4	HTTP://CTDBASE.ORG/	Sqstm1
0.0132963539045858	1	19	231.263157894737	Deguelin	HTTP://CTDBASE.ORG/	Myc
0.0132963539045858	1	19	231.263157894737	Gemcitabine	HTTP://CTDBASE.ORG/	Myc
0.0132963539045858	1	19	231.263157894737	Soman	HTTP://CTDBASE.ORG/	Myc
0.0135609378212552	1	20	219.7	3,3'-diindolylmethane	HTTP://CTDBASE.ORG/	Myc
0.0135609378212552	1	20	219.7	Alginic Acid	HTTP://CTDBASE.ORG/	Sqstm1
0.0135609378212552	1	20	219.7	Hemin	HTTP://CTDBASE.ORG/	Hif1a
0.0135609378212552	1	20	219.7	Hydroxychloroquine	HTTP://CTDBASE.ORG/	Sqstm1
0.013809487277263	1	21	209.238095238095	Budesonide	HTTP://CTDBASE.ORG/	Myc
0.013809487277263	1	21	209.238095238095	Phloretin	HTTP://CTDBASE.ORG/	Hif1a
0.013809487277263	1	21	209.238095238095	Reserpine	HTTP://CTDBASE.ORG/	Myc
0.013809487277263	1	21	209.238095238095	Thymol	HTTP://CTDBASE.ORG/	Myc
0.0139137674978861	2	495	17.7535353535354	GW 4064	HTTP://CTDBASE.ORG/	Hif1a Sqstm1
0.0140434067667909	1	22	199.727272727273	Apicidin	HTTP://CTDBASE.ORG/	Myc
0.0140434067667909	1	22	199.727272727273	Nimbolide	HTTP://CTDBASE.ORG/	Hif1a
0.0140434067667909	1	22	199.727272727273	Wogonin	HTTP://CTDBASE.ORG/	Hif1a
0.0140644457247557	1	23	191.04347826087	Bafilomycin A1	HTTP://CTDBASE.ORG/	Sqstm1
0.0140644457247557	1	23	191.04347826087	Gemfibrozil	HTTP://CTDBASE.ORG/	Myc
0.0140644457247557	1	23	191.04347826087	Glucaric Acid	HTTP://CTDBASE.ORG/	Myc
0.0140644457247557	1	23	191.04347826087	Manganese(III)-tetrakis(4-benzoic acid)porphyrin	HTTP://CTDBASE.ORG/	Hif1a
0.0140644457247557	1	23	191.04347826087	Tricarbonyldichlororuthenium (II) dimer	HTTP://CTDBASE.ORG/	Hif1a
0.0140644457247557	1	23	191.04347826087	Y 27632	HTTP://CTDBASE.ORG/	Hif1a
0.0141860252832064	1	24	183.083333333333	1,1-dimethylbutyl-1-deoxy-Delta(9)-THC	HTTP://CTDBASE.ORG/	Hif1a
0.0141860252832064	1	24	183.083333333333	GW0742	HTTP://CTDBASE.ORG/	Myc
0.0141860252832064	1	24	183.083333333333	HU 211	HTTP://CTDBASE.ORG/	Sqstm1
0.0141860252832064	1	24	183.083333333333	Pimagedine	HTTP://CTDBASE.ORG/	Hif1a
0.0141860252832064	2	526	16.7072243346008	Sodium bichromate	HTTP://CTDBASE.ORG/	Myc Sqstm1
0.0142856604428838	2	530	16.5811320754717	1-Methyl-4-phenylpyridinium	HTTP://CTDBASE.ORG/	Hif1a Sqstm1
0.0142856604428838	1	25	175.76	Anisomycin	HTTP://CTDBASE.ORG/	Sqstm1
0.0142856604428838	1	25	175.76	Chir 99021	HTTP://CTDBASE.ORG/	Sqstm1
0.0142856604428838	1	25	175.76	Dimethyl Fumarate	HTTP://CTDBASE.ORG/	Sqstm1
0.0142856604428838	1	25	175.76	Trehalose	HTTP://CTDBASE.ORG/	Sqstm1
0.014385616136971	1	26	169	1-nitropyrene	HTTP://CTDBASE.ORG/	Myc
0.014385616136971	1	26	169	7,14-dihydroxydocosa-4,8,10,12,16,19-hexaenoic acid	HTTP://CTDBASE.ORG/	Hif1a
0.014385616136971	1	26	169	Flufenoxuron	HTTP://CTDBASE.ORG/	Sqstm1
0.014385616136971	1	26	169	Sunitinib	HTTP://CTDBASE.ORG/	Sqstm1
0.014385616136971	1	26	169	Theaflavin	HTTP://CTDBASE.ORG/	Myc
0.0144575242615488	2	551	15.9491833030853	4-hydroxy-2-nonenal	HTTP://CTDBASE.ORG/	Gabarapl1 Sqstm1
0.0157422103766844	1	29	151.51724137931	Fasudil	HTTP://CTDBASE.ORG/	Hif1a
0.0157422103766844	1	29	151.51724137931	Nickel subsulfide	HTTP://CTDBASE.ORG/	Hif1a
0.0162666848264472	2	591	14.8697123519459	N-butoxyethanol	HTTP://CTDBASE.ORG/	Myc Sqstm1
0.0163180446938951	1	31	141.741935483871	2,4-Dichlorophenoxyacetic Acid	HTTP://CTDBASE.ORG/	Myc
0.0163180446938951	1	31	141.741935483871	2-methyl-2H-pyrazole-3-carboxylic acid (2-methyl-4-o-tolylazophenyl)amide	HTTP://CTDBASE.ORG/	Sqstm1
0.0163180446938951	2	599	14.6711185308848	Copper	HTTP://CTDBASE.ORG/	Gabarapl1 Sqstm1
0.0163180446938951	4	4437	3.96123506874014	Valproic Acid	HTTP://CTDBASE.ORG/	Gabarapl1 Hif1a Myc Sqstm1
0.0165439133747766	1	32	137.312	Aluminum	HTTP://CTDBASE.ORG/	Sqstm1
0.0165439133747766	1	32	137.312	Mancozeb	HTTP://CTDBASE.ORG/	Myc
0.0165439133747766	2	606	14.5016501650165	Tetrabromobisphenol A	HTTP://CTDBASE.ORG/	Myc Sqstm1
0.0165691460668877	1	33	133.151515151515	2,2-bis(4-glycidyloxyphenyl)propane	HTTP://CTDBASE.ORG/	Hif1a
0.0165691460668877	1	33	133.151515151515	4-(4-((5-(4,5-dimethyl-2-nitrophenyl)-2-furanyl)methylene)-4,5-dihydro-3-methyl-5-oxo-1H-pyrazol-1-yl)benzoic acid	HTTP://CTDBASE.ORG/	Myc
0.0165691460668877	1	33	133.151515151515	Citreoviridin	HTTP://CTDBASE.ORG/	Sqstm1
0.0165691460668877	2	616	14.2662337662338	Mono-(2-ethylhexyl)phthalate	HTTP://CTDBASE.ORG/	Hif1a Myc
0.0165691460668877	1	33	133.151515151515	Propofol	HTTP://CTDBASE.ORG/	Hif1a
0.0169721462129297	1	34	129.235294117647	3-methyladenine	HTTP://CTDBASE.ORG/	Sqstm1
0.0170681091634338	4	4571	3.84511047910742	Soot	HTTP://CTDBASE.ORG/	Gabarapl1 Hif1a Myc Sqstm1
0.0172723382902951	1	35	125.542857142857	Coenzyme Q10	HTTP://CTDBASE.ORG/	Sqstm1
0.0177544660538221	1	37	118.756756756757	Entinostat	HTTP://CTDBASE.ORG/	Hif1a
0.0177544660538221	1	37	118.756756756757	Imatinib Mesylate	HTTP://CTDBASE.ORG/	Sqstm1
0.0177544660538221	1	37	118.756756756757	Pyruvaldehyde	HTTP://CTDBASE.ORG/	Hif1a
0.0177544660538221	1	37	118.756756756757	Tetramethylpyrazine	HTTP://CTDBASE.ORG/	Hif1a
0.0177544660538221	1	37	118.756756756757	Vinyl carbamate	HTTP://CTDBASE.ORG/	Myc
0.0181330244832389	1	38	115.631578947368	Bromodeoxyuridine	HTTP://CTDBASE.ORG/	Myc
0.0183268275677807	1	40	109.85	2-amino-1-methyl-6-phenylimidazo(4,5-b)pyridine	HTTP://CTDBASE.ORG/	Myc
0.0183268275677807	1	39	112.666666666667	Acetylcholine	HTTP://CTDBASE.ORG/	Sqstm1
0.0183268275677807	1	40	109.85	Gingerol	HTTP://CTDBASE.ORG/	Hif1a
0.0183268275677807	2	676	13	Mustard Gas	HTTP://CTDBASE.ORG/	Hif1a Myc
0.0183268275677807	1	40	109.85	Saccharin	HTTP://CTDBASE.ORG/	Myc
0.0183268275677807	2	684	12.8479532163743	Streptozocin	HTTP://CTDBASE.ORG/	Hif1a Sqstm1
0.0183268275677807	2	675	13.0192592592593	Sulforaphane	HTTP://CTDBASE.ORG/	Myc Sqstm1
0.0183268275677807	1	40	109.85	Tanshinone	HTTP://CTDBASE.ORG/	Myc
0.0186423970214805	1	41	107.170731707317	Tri-o-cresyl phosphate	HTTP://CTDBASE.ORG/	Sqstm1
0.0187056500434604	1	42	104.619047619048	Butyric Acid	HTTP://CTDBASE.ORG/	Myc
0.0187056500434604	1	42	104.619047619048	Corosolic acid	HTTP://CTDBASE.ORG/	Sqstm1
0.0187056500434604	1	42	104.619047619048	Deferoxamine	HTTP://CTDBASE.ORG/	Hif1a
0.0187056500434604	1	42	104.619047619048	Penicillin G	HTTP://CTDBASE.ORG/	Myc
0.0187372956117752	2	703	12.5007112375533	Dronabinol	HTTP://CTDBASE.ORG/	Myc Sqstm1
0.0189558521453465	1	43	102.186046511628	Ketamine	HTTP://CTDBASE.ORG/	Sqstm1
0.0192974581863108	1	44	99.8636363636364	DDT	HTTP://CTDBASE.ORG/	Myc
0.0196355688679016	1	45	97.6444444444445	Linuron	HTTP://CTDBASE.ORG/	Hif1a
0.0197014728097756	2	729	12.0548696844993	Perfluorooctane sulfonic acid	HTTP://CTDBASE.ORG/	Myc Sqstm1
0.0197734852732127	1	46	95.5217391304348	Celastrol	HTTP://CTDBASE.ORG/	Myc
0.0197734852732127	1	46	95.5217391304348	Diazinon	HTTP://CTDBASE.ORG/	Myc
0.0202197332956242	3	2379	5.54098360655738	Sodium arsenite	HTTP://CTDBASE.ORG/	Hif1a Myc Sqstm1
0.0202308087924483	3	2384	5.52936241610738	Oxygen	HTTP://CTDBASE.ORG/	Hif1a Myc Sqstm1
0.0202308087924483	1	48	91.5416666666667	Perfosfamide	HTTP://CTDBASE.ORG/	Hif1a
0.0202308087924483	1	48	91.5416666666667	Triclosan	HTTP://CTDBASE.ORG/	Myc
0.020551123062832	1	49	89.6734693877551	Vitamin E	HTTP://CTDBASE.ORG/	Hif1a
0.0207689234531277	1	50	87.88	1-trifluoromethoxyphenyl-3-(1-propionylpiperidine-4-yl)urea	HTTP://CTDBASE.ORG/	Myc
0.0207689234531277	1	50	87.88	6-formylindolo(3,2-b)carbazole	HTTP://CTDBASE.ORG/	Sqstm1
0.0210819829690499	1	51	86.156862745098	Eugenol	HTTP://CTDBASE.ORG/	Myc
0.0212915823623281	1	52	84.5	1,2-bis(2-aminophenoxy)ethane N,N,N',N'-tetraacetic acid acetoxymethyl ester	HTTP://CTDBASE.ORG/	Myc
0.0212915823623281	1	52	84.5	Aluminum Chloride	HTTP://CTDBASE.ORG/	Sqstm1
0.0213976844326149	1	53	82.9056603773585	Notoginsenoside R1	HTTP://CTDBASE.ORG/	Sqstm1
0.0213976844326149	1	53	82.9056603773585	Obeticholic acid	HTTP://CTDBASE.ORG/	Sqstm1
0.0213976844326149	1	53	82.9056603773585	Pterostilbene	HTTP://CTDBASE.ORG/	Sqstm1
0.0220987921997401	1	55	79.8909090909091	Tocopherols	HTTP://CTDBASE.ORG/	Myc
0.0234951428344416	2	835	10.5245508982036	Arsenite	HTTP://CTDBASE.ORG/	Hif1a Sqstm1
0.0234951428344416	1	59	74.4745762711864	Eicosapentaenoic Acid	HTTP://CTDBASE.ORG/	Sqstm1
0.0236606605936859	1	60	73.2333333333333	Chlordan	HTTP://CTDBASE.ORG/	Myc
0.0236606605936859	1	60	73.2333333333333	Lipopolysaccharide E. coli O26-B6	HTTP://CTDBASE.ORG/	Hif1a
0.0238765762667802	2	848	10.3632075471698	Progesterone	HTTP://CTDBASE.ORG/	Hif1a Myc
0.0240103219284998	1	62	70.8709677419355	Endosulfan	HTTP://CTDBASE.ORG/	Myc
0.0240103219284998	1	62	70.8709677419355	Estrogens	HTTP://CTDBASE.ORG/	Sqstm1
0.0240103219284998	1	62	70.8709677419355	Graphite	HTTP://CTDBASE.ORG/	Sqstm1
0.0241804269737509	1	63	69.7460317460317	(3R)-((2,3-dihydro-5-methyl-3-((4-morpholinyl)methyl)pyrrolo-(1,2,3-de)-1,4-benzoxazin-6-yl)(1-naphthalenyl))methanone	HTTP://CTDBASE.ORG/	Myc
0.0241804269737509	1	63	69.7460317460317	Oleanolic Acid	HTTP://CTDBASE.ORG/	Myc
0.0244542789191893	1	64	68.6562	Genipin	HTTP://CTDBASE.ORG/	Sqstm1
0.0247256700772078	1	65	67.6	Taurine	HTTP://CTDBASE.ORG/	Sqstm1
0.0253710291968274	1	67	65.5820895522388	Acetylhydrazine	HTTP://CTDBASE.ORG/	Myc
0.0260105270265676	1	69	63.6811594202899	Emodin	HTTP://CTDBASE.ORG/	Hif1a
0.0262713601189143	1	70	62.7714285714286	Dorsomorphin	HTTP://CTDBASE.ORG/	Sqstm1
0.0267861356767164	1	72	61.0277777777778	Antimycin A	HTTP://CTDBASE.ORG/	Sqstm1
0.0267861356767164	1	72	61.0277777777778	Polyhexamethyleneguanidine	HTTP://CTDBASE.ORG/	Myc
0.0270401368042287	1	73	60.1917808219178	Iron	HTTP://CTDBASE.ORG/	Hif1a
0.0276582100068686	1	75	58.5866666666667	Chloroform	HTTP://CTDBASE.ORG/	Myc
0.0279061880925518	1	76	57.8157894736842	Cylindrospermopsin	HTTP://CTDBASE.ORG/	Sqstm1
0.0279174158491694	1	77	57.0649350649351	Chenodeoxycholic Acid	HTTP://CTDBASE.ORG/	Sqstm1
0.0279174158491694	1	77	57.0649350649351	S-(1,1,2,2-tetrafluoroethyl)cysteine	HTTP://CTDBASE.ORG/	Sqstm1
0.0279174158491694	1	77	57.0649350649351	Trimethyltin	HTTP://CTDBASE.ORG/	Hif1a
0.0281600715410072	1	78	56.3333333333333	Wortmannin	HTTP://CTDBASE.ORG/	Sqstm1
0.0282837814520333	1	79	55.620253164557	Cholesterol Dietary	HTTP://CTDBASE.ORG/	Sqstm1
0.0282837814520333	1	79	55.620253164557	Lycopene	HTTP://CTDBASE.ORG/	Sqstm1
0.0295833101670047	1	83	52.9397590361446	Mifepristone	HTTP://CTDBASE.ORG/	Myc
0.0297663934658354	3	2915	4.5221269296741	Dibutyl Phthalate	HTTP://CTDBASE.ORG/	Gabarapl1 Myc Sqstm1
0.0300443797325881	1	85	51.6941176470588	Blood Glucose	HTTP://CTDBASE.ORG/	Sqstm1
0.0302537762550389	1	87	50.5057471264368	Cholic Acid	HTTP://CTDBASE.ORG/	Sqstm1
0.0302537762550389	1	86	51.093023255814	Manganese	HTTP://CTDBASE.ORG/	Hif1a
0.0302537762550389	1	87	50.5057471264368	Methyldithiocarbamate	HTTP://CTDBASE.ORG/	Hif1a
0.0302537762550389	1	87	50.5057471264368	Zinc chloride	HTTP://CTDBASE.ORG/	Hif1a
0.0305767100659039	1	89	49.3707865168539	Croton Oil	HTTP://CTDBASE.ORG/	Myc
0.0305767100659039	2	1032	8.51550387596899	Trichloroethylene	HTTP://CTDBASE.ORG/	Myc Sqstm1
0.0305767100659039	1	89	49.3707865168539	Trichostatin A	HTTP://CTDBASE.ORG/	Myc
0.0315650221944448	1	93	47.247311827957	Acetaldehyde	HTTP://CTDBASE.ORG/	Myc
0.0315650221944448	1	93	47.247311827957	Chloroquine	HTTP://CTDBASE.ORG/	Sqstm1
0.0315650221944448	1	93	47.247311827957	Cupric chloride	HTTP://CTDBASE.ORG/	Sqstm1
0.0324476022832287	1	96	45.7708333333333	Ochratoxin A	HTTP://CTDBASE.ORG/	Myc
0.0326555490613449	1	97	45.2989690721649	Retinol acetate	HTTP://CTDBASE.ORG/	Sqstm1
0.0328962125066513	2	1087	8.08463661453542	Dichloroacetic Acid	HTTP://CTDBASE.ORG/	Hif1a Myc
0.0336780959806621	2	1105	7.95294117647059	Succimer	HTTP://CTDBASE.ORG/	Myc Sqstm1
0.0336780959806621	1	101	43.5049504950495	Triiodothyronine	HTTP://CTDBASE.ORG/	Sqstm1
0.0337991789330091	1	102	43.078431372549	Docosahexaenoic Acids	HTTP://CTDBASE.ORG/	Sqstm1
0.0339976741960991	1	103	42.6601941747573	Methylnitronitrosoguanidine	HTTP://CTDBASE.ORG/	Myc
0.0341946061159263	1	104	42.25	Dinoprostone	HTTP://CTDBASE.ORG/	Hif1a
0.0343899923988603	1	105	41.847619047619	Palmitic Acid	HTTP://CTDBASE.ORG/	Sqstm1
0.035287606768143	1	109	40.3119266055046	Monomethylarsonous acid	HTTP://CTDBASE.ORG/	Myc
0.035287606768143	1	109	40.3119266055046	Nickel chloride	HTTP://CTDBASE.ORG/	Hif1a
0.035287606768143	2	1144	7.68181818181818	Pentachlorophenol	HTTP://CTDBASE.ORG/	Hif1a Sqstm1
0.0353460088994448	1	110	39.9454545454545	Curdlan	HTTP://CTDBASE.ORG/	Myc
0.0353460088994448	2	1154	7.61525129982669	Magnetite Nanoparticles	HTTP://CTDBASE.ORG/	Myc Sqstm1
0.0358476440087829	1	112	39.2321428571429	Ciprofibrate	HTTP://CTDBASE.ORG/	Sqstm1
0.0372933290041405	1	117	37.5555555555556	Fluoxetine	HTTP://CTDBASE.ORG/	Sqstm1
0.0378169607399966	2	1203	7.3050706566916	Pregnenolone Carbonitrile	HTTP://CTDBASE.ORG/	Myc Zfyve1
0.0382658001440408	3	3324	3.96570397111913	Phenobarbital	HTTP://CTDBASE.ORG/	Hif1a Myc Sqstm1
0.0396913803042908	1	126	34.8730158730159	Diethyl maleate	HTTP://CTDBASE.ORG/	Sqstm1
0.0401679957233895	1	128	34.3281	U 0126	HTTP://CTDBASE.ORG/	Sqstm1
0.0401869133786884	1	129	34.062015503876	Manganese chloride	HTTP://CTDBASE.ORG/	Hif1a
0.0401869133786884	1	129	34.062015503876	Phenytoin	HTTP://CTDBASE.ORG/	Myc
0.0403496105478675	1	130	33.8	Aspartame	HTTP://CTDBASE.ORG/	Myc
0.0414275082851174	1	134	32.7910447761194	Pyrazolanthrone	HTTP://CTDBASE.ORG/	Sqstm1
0.0423461441574214	1	138	31.8405797101449	Mercury	HTTP://CTDBASE.ORG/	Myc
0.0423461441574214	2	1299	6.76520400307929	Testosterone	HTTP://CTDBASE.ORG/	Hif1a Myc
0.0437054710572351	1	143	30.7272727272727	1-Naphthylisothiocyanate	HTTP://CTDBASE.ORG/	Hif1a
0.0456543702838267	1	150	29.2933333333333	Hydrogen Sulfide	HTTP://CTDBASE.ORG/	Hif1a
0.0459312132152944	1	152	28.9078947368421	Cholesterol	HTTP://CTDBASE.ORG/	Sqstm1
0.0459312132152944	2	1366	6.43338213762811	Diethylnitrosamine	HTTP://CTDBASE.ORG/	Myc Sqstm1
0.0475519493647599	1	158	27.8101265822785	Urethane	HTTP://CTDBASE.ORG/	Myc
0.0476824139652076	1	159	27.6352201257862	4-vinyl-1-cyclohexene dioxide	HTTP://CTDBASE.ORG/	Hif1a
0.0478119216773252	1	160	27.4625	Melatonin	HTTP://CTDBASE.ORG/	Sqstm1
0.0489448865320527	1	165	26.630303030303	Nickel sulfate	HTTP://CTDBASE.ORG/	Myc
0.0489448865320527	1	165	26.630303030303	Phosgene	HTTP://CTDBASE.ORG/	Myc
0.0499415564561135	1	169	26	Graphene oxide	HTTP://CTDBASE.ORG/	Sqstm1
0.0512203049669657	1	174	25.2528735632184	Piperonyl Butoxide	HTTP://CTDBASE.ORG/	Myc
0.0517360383328799	1	177	24.8248587570621	Copper Sulfate	HTTP://CTDBASE.ORG/	Sqstm1
0.0517360383328799	1	177	24.8248587570621	Ginkgo biloba extract	HTTP://CTDBASE.ORG/	Myc
0.05213437412846	1	179	24.5474860335196	Cholecalciferol	HTTP://CTDBASE.ORG/	Hif1a
0.052195239377735	2	1497	5.87040748162993	Lipopolysaccharides	HTTP://CTDBASE.ORG/	Hif1a Sqstm1
0.052195239377735	2	1495	5.87826086956522	Vinylidene chloride	HTTP://CTDBASE.ORG/	Gabarapl1 Myc
0.0536990863470186	1	187	23.4973262032086	Methylnitrosourea	HTTP://CTDBASE.ORG/	Myc
0.0536990863470186	1	187	23.4973262032086	Sodium Selenite	HTTP://CTDBASE.ORG/	Sqstm1
0.0546456085753995	1	191	23.0052356020942	Ascorbic Acid	HTTP://CTDBASE.ORG/	Myc
0.055600525292407	2	1560	5.63333333333333	Decamethrin	HTTP://CTDBASE.ORG/	Gabarapl1 Sqstm1
0.0556806314461169	1	196	22.4183673469388	Zearalenone	HTTP://CTDBASE.ORG/	Sqstm1
0.0563315355683501	1	199	22.0804020100503	Lipopolysaccharide Escherichia coli O111 B4	HTTP://CTDBASE.ORG/	Hif1a
0.0584856868501408	3	4042	3.26125680356259	Ozone	HTTP://CTDBASE.ORG/	Gabarapl1 Hif1a Myc
0.0587221010126271	1	209	21.0239234449761	Benzalkonium Compounds	HTTP://CTDBASE.ORG/	Hif1a
0.0596601480166626	3	4082	3.22929936305732	Particulate Matter	HTTP://CTDBASE.ORG/	Hif1a Myc Sqstm1
0.059709316265615	1	214	20.5327102803738	Atrazine	HTTP://CTDBASE.ORG/	Sqstm1
0.0606064586087673	1	218	20.1559633027523	Cobaltous chloride	HTTP://CTDBASE.ORG/	Hif1a
0.0607585387690825	2	1660	5.29397590361446	Silver	HTTP://CTDBASE.ORG/	Gabarapl1 Sqstm1
0.0618402593190725	1	224	19.6160714285714	Dietary Sucrose	HTTP://CTDBASE.ORG/	Sqstm1
0.062450558370717	1	227	19.3568281938326	Caffeine	HTTP://CTDBASE.ORG/	Hif1a
0.0662739785214663	1	242	18.1570247933884	Fluorouracil	HTTP://CTDBASE.ORG/	Myc
0.0685455509703015	2	1785	4.92324929971989	Methidathion	HTTP://CTDBASE.ORG/	Hif1a Sqstm1
0.0706355215888321	1	260	16.9	Beta-N-methylamino-L-alanine	HTTP://CTDBASE.ORG/	Sqstm1
0.0727896676158829	1	269	16.3345724907063	Cyclophosphamide	HTTP://CTDBASE.ORG/	Hif1a
0.0734886488654387	2	1864	4.71459227467811	1,4-bis(2-(3,5-dichloropyridyloxy))benzene	HTTP://CTDBASE.ORG/	Myc Sqstm1
0.0739048428914833	1	275	15.9781818181818	Rimonabant	HTTP://CTDBASE.ORG/	Hif1a
0.0741954612262931	1	277	15.8628158844765	Plant Extracts	HTTP://CTDBASE.ORG/	Myc
0.0778520472348014	2	1934	4.54395036194416	Trimellitic anhydride	HTTP://CTDBASE.ORG/	Hif1a Myc
0.0789260025089071	2	1952	4.50204918032787	Sodium arsenate	HTTP://CTDBASE.ORG/	Hif1a Sqstm1
0.0809855029728558	1	306	14.359477124183	Tacrolimus	HTTP://CTDBASE.ORG/	Myc
0.0820166301471347	1	311	14.1286173633441	Abrine	HTTP://CTDBASE.ORG/	Myc
0.0827849630129991	1	315	13.9492063492064	Potassium Cyanide	HTTP://CTDBASE.ORG/	Hif1a
0.0832934921208207	1	318	13.8176100628931	Maneb	HTTP://CTDBASE.ORG/	Myc
0.0837948431112462	1	322	13.6459627329193	Fumonisin B1	HTTP://CTDBASE.ORG/	Sqstm1
0.0837948431112462	2	2036	4.31630648330059	Tobacco Smoke Pollution	HTTP://CTDBASE.ORG/	Myc Sqstm1
0.0850495394937737	1	328	13.3963414634146	Cocaine	HTTP://CTDBASE.ORG/	Sqstm1
0.0867958722275147	1	336	13.077380952381	Hydrogen Cyanide	HTTP://CTDBASE.ORG/	Hif1a
0.0877640387051627	1	342	12.8479532163743	2,3,7,8-tetrachlorodibenzofuran	HTTP://CTDBASE.ORG/	Hif1a
0.0877640387051627	1	341	12.8856304985337	Antigens Bacterial	HTTP://CTDBASE.ORG/	Hif1a
0.0879953613367472	1	344	12.7732558139535	Methylmercuric chloride	HTTP://CTDBASE.ORG/	Sqstm1
0.08820715738218	1	347	12.6628242074928	Furan	HTTP://CTDBASE.ORG/	Myc
0.08820715738218	1	347	12.6628242074928	Naphthalene	HTTP://CTDBASE.ORG/	Myc
0.0882391927393762	2	2126	4.13358419567262	Bisphenol F	HTTP://CTDBASE.ORG/	Hif1a Myc
0.0923233360325892	1	366	12.0054644808743	1-Methyl-4-phenyl-1,2,3,6-tetrahydropyridine	HTTP://CTDBASE.ORG/	Hif1a
0.0930215070677033	1	370	11.8756756756757	Hypochlorous Acid	HTTP://CTDBASE.ORG/	Sqstm1
0.0970990502489134	1	388	11.3247422680412	Parathion	HTTP://CTDBASE.ORG/	Gabarapl1
0.100178115738687	1	402	10.9303482587065	Amphotericin B deoxycholate drug combination	HTTP://CTDBASE.ORG/	Myc
0.103820835746888	2	2348	3.7427597955707	Clofibrate	HTTP://CTDBASE.ORG/	Myc Sqstm1
0.109575832043787	1	444	9.8963963963964	Captan	HTTP://CTDBASE.ORG/	Myc
0.109963615685156	1	447	9.82997762863535	Ethylnitrosourea	HTTP://CTDBASE.ORG/	Myc
0.110348744580404	1	450	9.76444444444444	3-(4'-hydroxy-3'-adamantylbiphenyl-4-yl)acrylic acid	HTTP://CTDBASE.ORG/	Myc
0.114609517740912	1	470	9.34893617021277	Cannabidiol	HTTP://CTDBASE.ORG/	Sqstm1
0.114609517740912	1	471	9.32908704883227	Methylmercury Compounds	HTTP://CTDBASE.ORG/	Sqstm1
0.119839303082817	1	495	8.87676767676768	Ovalbumin	HTTP://CTDBASE.ORG/	Hif1a
0.136890326826431	1	571	7.69527145359019	(+)-JQ1 compound	HTTP://CTDBASE.ORG/	Myc
0.13886896799143	2	2809	3.12851548593806	Aflatoxin B1	HTTP://CTDBASE.ORG/	Myc Zfyve1
0.145111202820167	1	611	7.19148936170213	Methamphetamine	HTTP://CTDBASE.ORG/	Sqstm1
0.146707763732429	1	620	7.08709677419355	MRK 003	HTTP://CTDBASE.ORG/	Myc
0.147624871769217	1	626	7.01916932907348	Diethylstilbestrol	HTTP://CTDBASE.ORG/	Myc
0.149199606913757	1	635	6.91968503937008	Pantogab	HTTP://CTDBASE.ORG/	Zfyve1
0.152083621470919	1	650	6.76	Toxins Biological	HTTP://CTDBASE.ORG/	Myc
0.154942095172056	1	666	6.5975975975976	Methotrexate	HTTP://CTDBASE.ORG/	Myc
0.154942095172056	1	667	6.58770614692654	Rosiglitazone	HTTP://CTDBASE.ORG/	Hif1a
0.162097339680297	1	702	6.25925925925926	1-methylanthracene	HTTP://CTDBASE.ORG/	Myc
0.167233964567153	1	728	6.03571428571429	Fluoranthene	HTTP://CTDBASE.ORG/	Myc
0.171036805018434	1	748	5.87433155080214	Triptolide	HTTP://CTDBASE.ORG/	Myc
0.182187618570941	1	803	5.4719800747198	N-nitroso-tris-chloroethylurea	HTTP://CTDBASE.ORG/	Myc
0.182520121971853	1	807	5.44485749690211	N-(2-(1,1'-bicyclopropyl)-2-ylphenyl)-3-(difluoromethyl)-1-methyl-1H-pyrazole-4-carboxamide	HTTP://CTDBASE.ORG/	Zfyve1
0.191248400059436	2	3467	2.53475627343525	Methionine	HTTP://CTDBASE.ORG/	Hif1a Myc
0.196125018771443	2	3526	2.49234259784458	Choline	HTTP://CTDBASE.ORG/	Hif1a Myc
0.19976260404577	1	898	4.89309576837416	Ciguatoxins	HTTP://CTDBASE.ORG/	Myc

## Sheet: Result
Enrichment FDR	nGenes	Pathway Genes	Fold Enrichment	Pathway	URL	Genes
0.00116471	2	22	399.455	Trigonelline	HTTP://CTDBASE.ORG/	Myc Sqstm1
0.00208823	2	39	225.333	Niacinamide	HTTP://CTDBASE.ORG/	Myc Sqstm1
0.00253123	2	48	183.083	O(2)-vinyl-1-(pyrrolidin-1-yl)diazen-1-ium-1,2-diolate	HTTP://CTDBASE.ORG/	Myc Sqstm1
0.00253123	2	51	172.314	Saponins	HTTP://CTDBASE.ORG/	Hif1a Myc
0.00271639	2	56	156.929	Taurocholic Acid	HTTP://CTDBASE.ORG/	Myc Sqstm1
0.00329929	2	65	135.2	Dactinomycin	HTTP://CTDBASE.ORG/	Myc Sqstm1
0.00424609	2	84	104.619	Lead nitrate	HTTP://CTDBASE.ORG/	Myc Sqstm1
0.00442712	2	89	98.7416	Lithium Chloride	HTTP://CTDBASE.ORG/	Myc Sqstm1
0.0045123	2	93	94.4946	Cycloheximide	HTTP://CTDBASE.ORG/	Hif1a Myc
0.00489166	2	100	87.88	Methylformamide	HTTP://CTDBASE.ORG/	Gabarapl1 Sqstm1
0.00544748	2	110	79.8909	Fulvestrant	HTTP://CTDBASE.ORG/	Hif1a Myc
0.00544748	2	115	76.4174	2-(2-amino-3-methoxyphenyl)-4H-1-benzopyran-4-one	HTTP://CTDBASE.ORG/	Hif1a Myc
0.00591922	2	123	71.4472	Epigallocatechin gallate	HTTP://CTDBASE.ORG/	Myc Sqstm1
0.00208823	3	329	40.0669	Arsenic Trioxide	HTTP://CTDBASE.ORG/	Hif1a Myc Sqstm1
0.000432883	4	482	36.4647	Hydrogen Peroxide	HTTP://CTDBASE.ORG/	Gabarapl1 Hif1a Myc Sqstm1
0.000781587	4	665	26.4301	Rotenone	HTTP://CTDBASE.ORG/	Gabarapl1 Hif1a Myc Sqstm1
0.00422362	3	515	25.5961	Glucose	HTTP://CTDBASE.ORG/	Hif1a Myc Sqstm1
0.00422362	3	526	25.0608	Nicotine	HTTP://CTDBASE.ORG/	Hif1a Myc Sqstm1
0.00116471	4	875	20.0869	Isoproterenol	HTTP://CTDBASE.ORG/	Gabarapl1 Hif1a Myc Sqstm1
0.00544748050625744	3	664	19.8524	Cadmium	HTTP://CTDBASE.ORG/	Hif1a Myc Sqstm1
